# Supplementary material for: Loss of Gene Information: Discrepancies between RNA Sequencing, cDNA Microarray, and qRT-PCR
Source: MDPI journal article supplement (doi:10.3390/ijms22179349), 2021-08-28
Supplement: s1 [file s1]

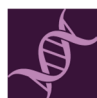

Article

# Supplementary Material: Loss of Gene Information: Discrepancies between RNA Sequencing, cDNA Microarray and qRT-PCR

Nicole Rachinger <sup>1</sup>, Stefan Fischer <sup>2</sup>, Ines Böhme <sup>1</sup>, Lisa Linck-Paulus <sup>1</sup>, Silke Kuphal <sup>1</sup>, Melanie Kappelmann-Fenzl <sup>2</sup> and Anja K. Bosserhoff <sup>1,\*</sup>

<sup>1</sup> Institute of Biochemistry, Friedrich-Alexander University Erlangen-Nürnberg (FAU), Fahrstraße 17, 91054, Erlangen, Germany

<sup>2</sup> Faculty of Computer Science, Deggendorf Institute of Technology, Dieter-Görlitz-Platz 1, 94469, Deggendorf, Germany

\* Correspondence: anja.bosserhoff@fau.de

## Supplementary Figures:

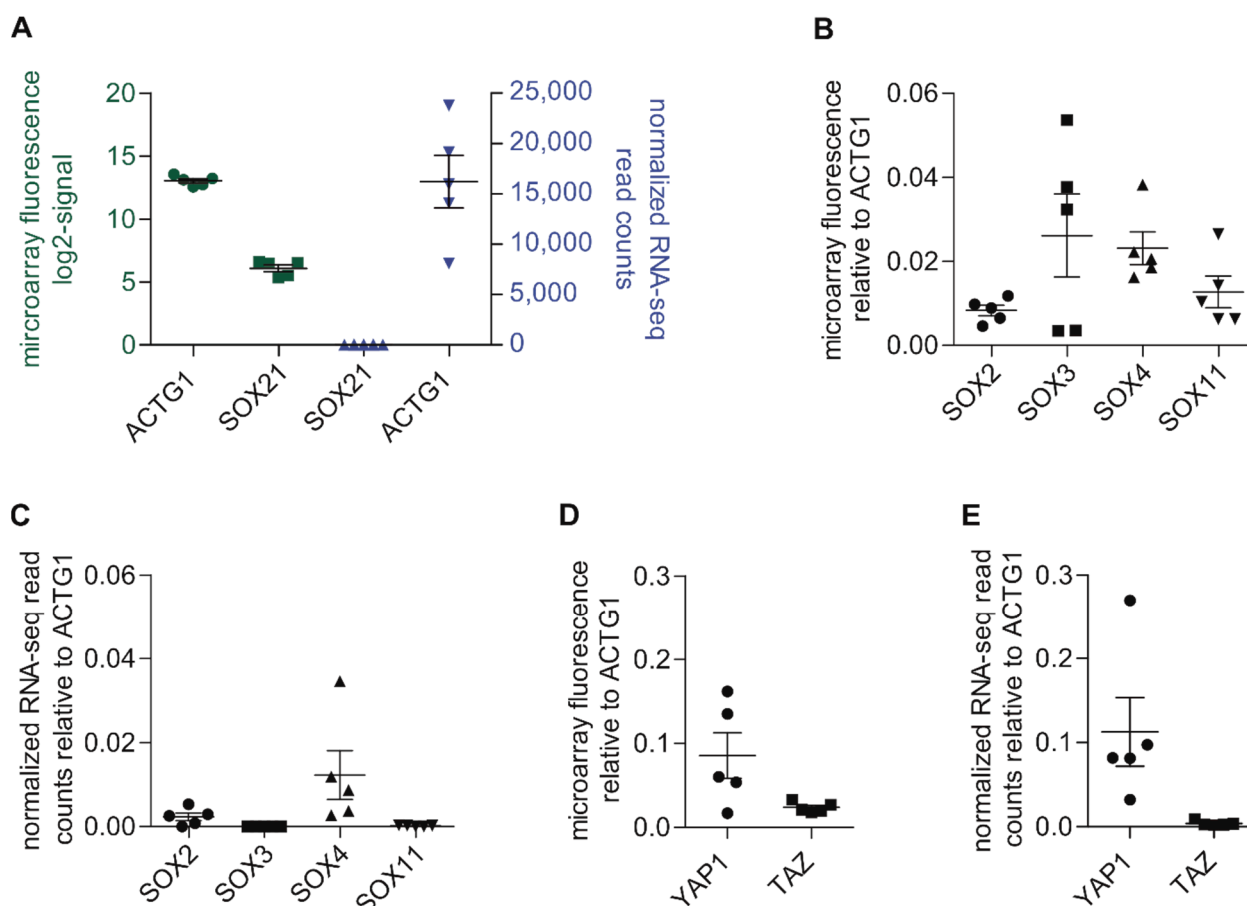

**Figure S1.** Comparison of the transcriptomic expression analysis by cDNA microarray and RNA-seq of different genes. **A)** Evaluation of the raw data from transcriptome analysis by cDNA microarray (Supplementary Table S1 and S4) and RNA-seq (Supplementary Table S2 and S5) for ACTG1 and SOX21. **B)** Analysis of the microarray detection of further SOX genes. **C)** RNA-Seq read counts depicted for further SOX gene family members. **D)** Transcriptomic profile of YAP1 and TAZ measured by microarray. **E)** Representation of RNA-seq read counts of YAP1 and TAZ. Unless otherwise declared ACTG1 was used for normalization of each method and cell line separately. Therefore datasets (cDNA microarray: Supplementary Table S1 and S4; RNA-seq: Supplementary Table S2 and S5) of five different cell lines were used. The box plots show the mean  $\pm$  SEM.

**A**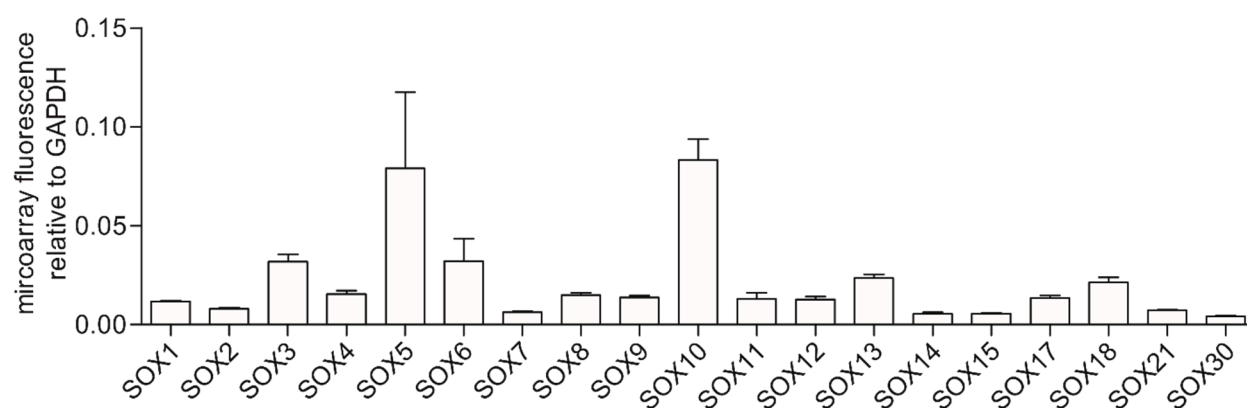**B**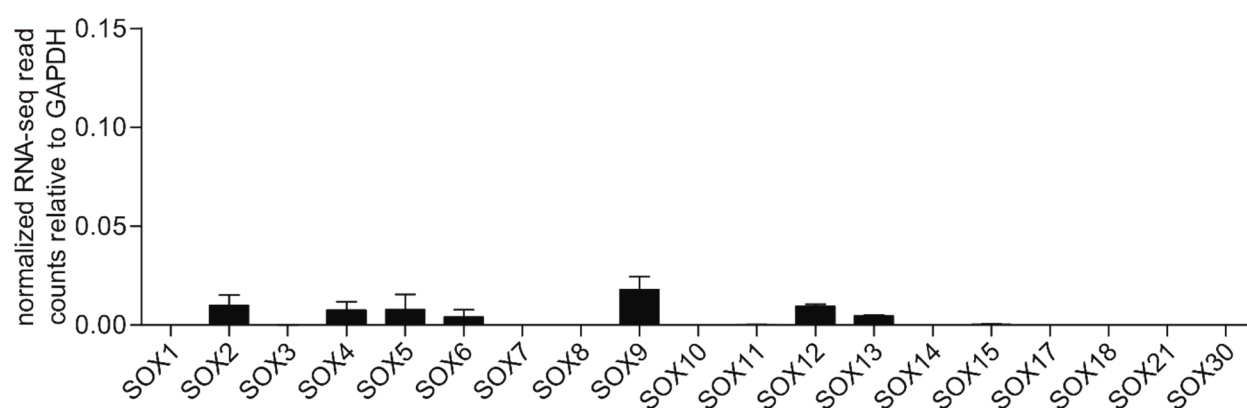**C**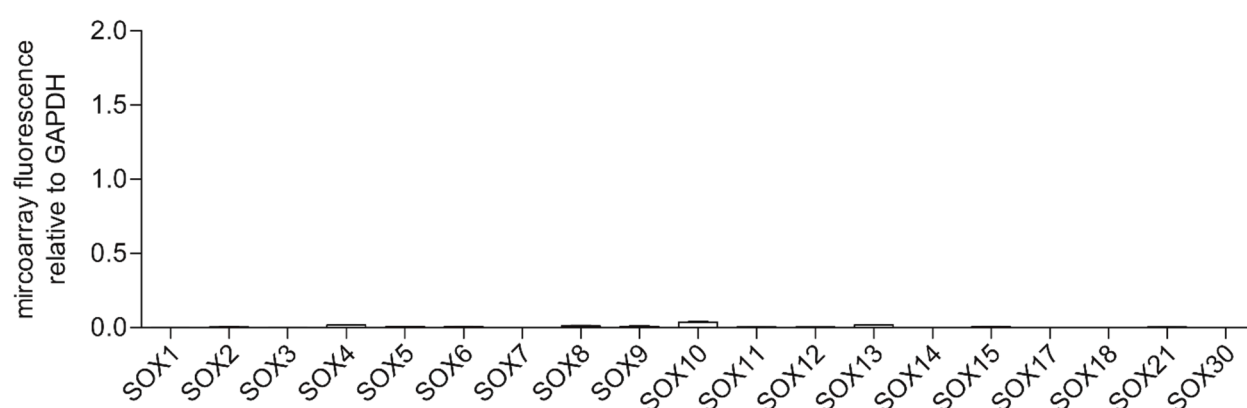**D**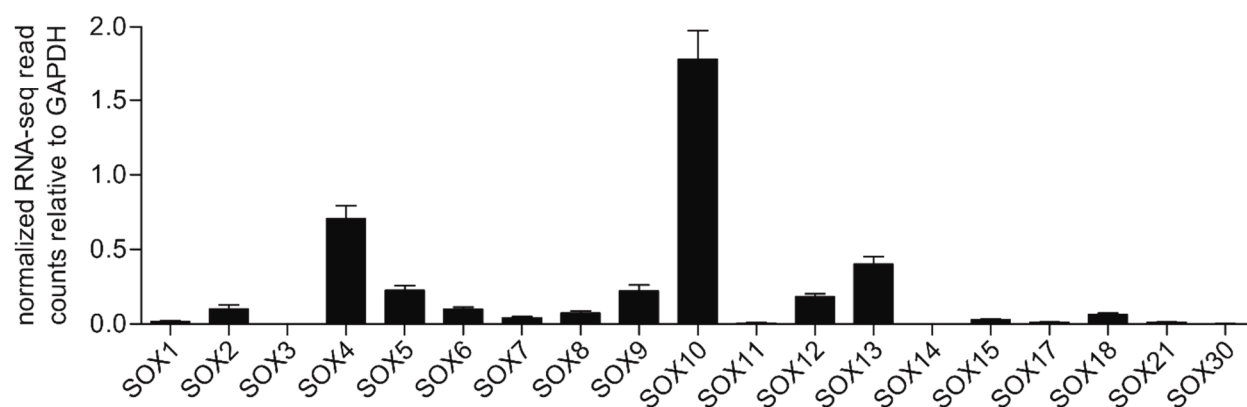

**Figure S2: Comparison of the transcriptomic expression analysis for the SOX gene family by cDNA microarray and RNA-seq of different fragmentation methods.** **A)** Detection profile analyzed by cDNA array (Supplementary Table S4) for three different melanoma cell lines. **B)** RNA-seq detection profile (Supplementary Table S5) for the SOX gene family by chemically fragmented RNA was shown. **C)** Depicts the cDNA array data from Hoek et al. (GSE4845 GPL570) for the SOX gene family profile. **D)** RNA-seq data from Kunz et al. (GSE112509) with mechanically fragmented RNA were shown. For all datasets GAPDH fluorescence signal for microarray analysis or read counts for RNA-seq analysis was used as reference. Box plots show the mean  $\pm$  SEM.

### Supplementary Tables:

Table S1: cDNA microarray dataset 1.

Table S2: RNA-seq dataset 1.

Table S3: Listed genes not detectable within RNA-seq dataset 1.

Table S4: cDNA microarray dataset 2.

Table S5: RNA-seq dataset 2.

**Table S6: Main criteria for measurable genes by cDNA microarray and RNA-seq.** Summary of expression data, GC content, free energy and length of RNA for different genes, defining a trend for the detection of genes by RNA-seq dependent on the  $|\text{free energy}|$  divided by the RNA length.

| name of the gene | cDNA array <sup>1</sup> | normalized RNA-seq reads <sup>1</sup> | GC content <sup>2</sup> in percent | free energy <sup>3</sup> (RNA fold) in kcal·mol <sup>-1</sup> | length in bp (base pairs) | quotient of $ \text{free energy} $ to length in kcal·mol <sup>-1</sup> ·bp <sup>-1</sup> |
|------------------|-------------------------|---------------------------------------|------------------------------------|---------------------------------------------------------------|---------------------------|------------------------------------------------------------------------------------------|
| GAPDH            | 12,911.93               | 14,152.95                             | 56.1                               | -484.65                                                       | 1285                      | 0.377                                                                                    |
| ACTG1            | 10,075.86               | 16,387.26                             | 56.1                               | -748.40                                                       | 2038                      | 0.367                                                                                    |
| SOX21            | 91.39                   | 0.72                                  | 55.6                               | -1208.90                                                      | 2924                      | 0.413                                                                                    |
| SOX2             | 103.78                  | 57.36                                 | 50.7                               | -877.91                                                       | 2512                      | 0.349                                                                                    |
| SOX3             | 405.60                  | 0.19                                  | 63.3                               | -907.24                                                       | 2085                      | 0.435                                                                                    |
| SOX4             | 164.29                  | 97.37                                 | 52.5                               | -1896.38                                                      | 4869                      | 0.389                                                                                    |
| YAP1             | 1,140.21                | 1,383.82                              | 43.5                               | -1730.04                                                      | 5401                      | 0.320                                                                                    |
| TAZ              | 268.69                  | 39.17                                 | 60.4                               | -818.68                                                       | 1906                      | 0.429                                                                                    |

<sup>1</sup> values out of Supplementary Table S1 and S2 rounded to two decimal places. <sup>2</sup> data from endmemo DNA/RNA GC content calculator. <sup>3</sup> calculated with Zuker algorithm by the RNAfold server of the ViennaRNA Web service.
