# Supplementary material for: Loss of Gene Information: Discrepancies between RNA Sequencing, cDNA Microarray, and qRT-PCR
Source: Int J Mol Sci. 2021 Aug 28;22(17):9349. doi: 10.3390/ijms22179349 (PMC8430810; doi:10.3390/ijms22179349)
Supplement: Supplementary file 1 [file ijms-22-09349-s001.zip]

Archive with 6 entries (6 files):
- Supplementary figures table6.pdf
- Supplementary_Table_S1.xlsx
- Supplementary_Table_S2.xlsx
- Supplementary_Table_S3.xlsx
- Supplementary_Table_S4.xlsx
- Supplementary_Table_S5.xlsx
