# Supplementary material for: Loss of Gene Information: Discrepancies between RNA Sequencing, cDNA Microarray, and qRT-PCR
Source: Int J Mol Sci. 2021 Aug 28;22(17):9349. doi: 10.3390/ijms22179349 (PMC8430810; doi:10.3390/ijms22179349)
Supplement: Supplementary file 1 [file ijms-22-09349-s001.zip › Supplementary_Table_S1.xlsx]

## Sheet: P044_Affymetrix Result_RMA
Probe Set ID	P044_03_Mel_Im_1_log2 Signal	P044_04_Mel_Im_2_log2 Signal	P044_07_Mel_Juso_1_log2 Signal	P044_08_Mel_Juso_2_log2 Signal		average_log2 Signal_Mel_Im	average_log2 Signal_Juso		Gene Accession	Gene Symbol	Gene Description	Cytoband	mRNA Accession	mRNA Source	mRna - Description	mRNA Assignment Score	mRNA Assignment Coverage	mRNA - Direct Probes	mRNA - Possible Probes	mRNA - xhyb	UniGene ID	UniGene Expression Information	Chromosome	Strand	Start	Stop	SwissProt mRna Accession	SwissProt accession	GO Biological Process ID	GO Biological Process Term	GO Biological Process Evidence	GO Cellular Component ID	GO Cellular Component Term	GO Cellular Component Evidence	GO Molecular Function ID	GO Molecular Function Term	GO Molecular Function Evidence	Pathway Source	Pathway Name	Protein Domains - Source	Protein Dom - Acc or domain name	Protein Domains - Description	transcript_cluster_id	total_probes	crosshyb_type	category
17016403	5.80941	7.89304	2.4489	3.13355		6.85123	2.79123		NM_003534	HIST1H3G	histone cluster 1, H3g	6p22.1	NM_003534	RefSeq	Homo sapiens histone cluster 1, H3g (HIST1H3G), mRNA.	100	100	9	9	TRUE	Hs.247813	blood| kidney| skin| kidney tumor| normal| skin tumor	chr6	-	26271146	26271612	NM_003534	P68431	GO:0006325 // GO:0006334 // GO:0006335 // GO:0007596 // GO:0060968	chromatin organization // nucleosome assembly // DNA replication-dependent nucleosome assembly // blood coagulation // regulation of gene silencing	traceable author statement // inferred from electronic annotation // inferred from direct assay // traceable author statement // inferred from direct assay	GO:0000228 // GO:0000786 // GO:0005576 // GO:0005634 // GO:0005634 // GO:0005654 // GO:0005694 // GO:0016020 // GO:0043234 // GO:0070062	nuclear chromosome // nucleosome // extracellular region // nucleus // nucleus // nucleoplasm // chromosome // membrane // protein complex // extracellular vesicular exosome	inferred from direct assay // inferred from electronic annotation // traceable author statement // inferred from direct assay // inferred from electronic annotation // traceable author statement // inferred from electronic annotation // inferred from direct assay // inferred from direct assay // inferred from direct assay	GO:0003677 // GO:0005515 // GO:0046982	DNA binding // protein binding // protein heterodimerization activity	inferred from electronic annotation // inferred from physical interaction // inferred from electronic annotation	---	---	---	---	---	17016403	9	1	main
17016499	7.42681	9.25816	5.20031	4.8117		8.34249	5.006		NM_005322	HIST1H1B	histone cluster 1, H1b	6p22.1	NM_005322	RefSeq	Homo sapiens histone cluster 1, H1b (HIST1H1B), mRNA.	100	100	11	11	TRUE	Hs.131956	bladder| intestine| skin| colorectal tumor| normal| fetus| adult	chr6	-	27834570	27835359	NM_005322	P16401	GO:0000122 // GO:0006325 // GO:0006334 // GO:0030307 // GO:0050821 // GO:0051574 // GO:0071169	negative regulation of transcription from RNA polymerase II promoter // chromatin organization // nucleosome assembly // positive regulation of cell growth // protein stabilization // positive regulation of histone H3-K9 methylation // establishment of protein localization to chromatin	inferred from mutant phenotype // inferred from mutant phenotype // inferred from electronic annotation // inferred from mutant phenotype // inferred from mutant phenotype // inferred from mutant phenotype // inferred from mutant phenotype	GO:0000786 // GO:0000790 // GO:0005720 // GO:0070062 // GO:0005634 // GO:0005694	nucleosome // nuclear chromatin // nuclear heterochromatin // extracellular vesicular exosome // nucleus // chromosome	inferred from electronic annotation // inferred from direct assay // inferred from direct assay // inferred from direct assay // inferred from electronic annotation // inferred from electronic annotation	GO:0031490 // GO:0042826 // GO:0044822 // GO:0003677	chromatin DNA binding // histone deacetylase binding // poly(A) RNA binding // DNA binding	inferred from mutant phenotype // inferred from physical interaction // inferred from direct assay // inferred from electronic annotation	---	---	---	---	---	17016499	11	1	main
16719515	8.91079	10.2636	10.3332	9.11003		9.58722	9.72163		NM_001145966	MKI67	marker of proliferation Ki-67	10q26.2	NM_001145966	RefSeq	Homo sapiens marker of proliferation Ki-67 (MKI67), transcript variant 2, mRNA.	100	88	28	28	FALSE	Hs.80976 // Hs.689823	adrenal gland| ascites| bladder| blood| bone| bone marrow| brain| cervix| connective tissue| embryonic tissue| esophagus| eye| heart| intestine| kidney| larynx| liver| lung| lymph| lymph node| mammary gland| mouth| muscle| ovary| pancreas| pharynx| placenta| prostate| skin| spleen| stomach| testis| thymus| thyroid| uterus| vascular|adrenal tumor| bladder carcinoma| breast (mammary gland) tumor| c…	chr10	-	129894923	129924649	NM_001145966	P46013	GO:0006259 // GO:0007126 // GO:0008283 // GO:0014070 // GO:0030212 // GO:0031100 // GO:0034605 // GO:0007049 // GO:0008283	DNA metabolic process // meiotic nuclear division // cell proliferation // response to organic cyclic compound // hyaluronan metabolic process // organ regeneration // cellular response to heat // cell cycle // cell proliferation	inferred from electronic annotation // inferred from electronic annotation // traceable author statement // inferred from electronic annotation // inferred from electronic annotation // inferred from electronic annotation // inferred from electronic annotation // inferred from electronic annotation // inferred from electronic annotation	GO:0000775 // GO:0000793 // GO:0005634 // GO:0005730 // GO:0005737 // GO:0005622 // GO:0005634 // GO:0005694 // GO:0005730 // GO:0016020	chromosome, centromeric region // condensed chromosome // nucleus // nucleolus // cytoplasm // intracellular // nucleus // chromosome // nucleolus // membrane	inferred from electronic annotation // inferred from electronic annotation // inferred from direct assay // inferred from direct assay // inferred from electronic annotation // inferred from electronic annotation // inferred from electronic annotation // inferred from electronic annotation // inferred from electronic annotation // inferred from direct assay	GO:0005515 // GO:0005524 // GO:0008022 // GO:0044822 // GO:0000166	protein binding // ATP binding // protein C-terminus binding // poly(A) RNA binding // nucleotide binding	inferred from physical interaction // inferred from electronic annotation // inferred from physical interaction // inferred from direct assay // inferred from electronic annotation	---	---	---	---	---	16719515	32	1	main
16989636	8.78666	9.77374	9.5917	8.26104		9.2802	8.92637		NM_005733	KIF20A	kinesin family member 20A	5q31	NM_005733	RefSeq	Homo sapiens kinesin family member 20A (KIF20A), mRNA.	90	90	19	21	TRUE	Hs.718626	adrenal gland| ascites| blood| bone marrow| brain| cervix| connective tissue| embryonic tissue| esophagus| eye| heart| intestine| kidney| liver| lung| lymph| lymph node| mammary gland| mouth| muscle| ovary| pancreas| placenta| skin| testis| thymus| thyroid| tonsil| trachea| uterus| vascular|adrenal tumor| bladder carcinoma| breast (mammary gland) tumor| cervical tumor| chondrosarcoma| colorectal …	chr5	+	137514408	137523404	NM_005733	O95235	GO:0000278 // GO:0000910 // GO:0001578 // GO:0007018 // GO:0008152 // GO:0015031 // GO:0016192 // GO:0000910 // GO:0006810	mitotic cell cycle // cytokinesis // microtubule bundle formation // microtubule-based movement // metabolic process // protein transport // vesicle-mediated transport // cytokinesis // transport	traceable author statement // inferred from direct assay // inferred from direct assay // inferred from electronic annotation // inferred from electronic annotation // inferred from electronic annotation // traceable author statement // inferred from electronic annotation // inferred from electronic annotation	GO:0005654 // GO:0005794 // GO:0005819 // GO:0005871 // GO:0005874 // GO:0005737 // GO:0005794 // GO:0005819 // GO:0005856	nucleoplasm // Golgi apparatus // spindle // kinesin complex // microtubule // cytoplasm // Golgi apparatus // spindle // cytoskeleton	traceable author statement // inferred from electronic annotation // inferred from direct assay // inferred from electronic annotation // inferred from electronic annotation // inferred from electronic annotation // traceable author statement // inferred from electronic annotation // inferred from electronic annotation	GO:0003777 // GO:0005215 // GO:0005524 // GO:0008017 // GO:0019901 // GO:0000166	microtubule motor activity // transporter activity // ATP binding // microtubule binding // protein kinase binding // nucleotide binding	inferred from electronic annotation // traceable author statement // inferred from electronic annotation // inferred from electronic annotation // inferred from physical interaction // inferred from electronic annotation	---	---	---	---	---	16989636	21	1	main
16844312	9.70407	10.4462	10.6609	9.46147		10.0752	10.0612		NM_001067	TOP2A	topoisomerase (DNA) II alpha 170kDa	17q21-q22	NM_001067	RefSeq	Homo sapiens topoisomerase (DNA) II alpha 170kDa (TOP2A), mRNA.	97	97	33	34	TRUE	Hs.156346	adrenal gland| ascites| bladder| blood| bone| bone marrow| brain| cervix| connective tissue| ear| embryonic tissue| esophagus| eye| heart| intestine| kidney| liver| lung| lymph| lymph node| mammary gland| mouth| muscle| ovary| pancreas| pharynx| placenta| prostate| salivary gland| skin| spleen| stomach| testis| thymus| trachea| uterus| vascular|adrenal tumor| bladder carcinoma| breast (mammary gl…	chr17	-	38544768	38574408	NM_001067	P11388	GO:0000278 // GO:0000712 // GO:0000819 // GO:0006200 // GO:0006200 // GO:0006260 // GO:0006265 // GO:0006266 // GO:0006268 // GO:0006281 // GO:0006312 // GO:0006974 // GO:0007059 // GO:0030263 // GO:0040016 // GO:0043065 // GO:0044774 // GO:0045070 // GO:0045870 // GO:0045944 // GO:0048015 // GO:0000712 // GO:0000819 // GO:0006259 // GO:0006265 // GO:0006268 // GO:0006312 // GO:0007059 // GO:0030…	mitotic cell cycle // resolution of meiotic recombination intermediates // sister chromatid segregation // ATP catabolic process // ATP catabolic process // DNA replication // DNA topological change // DNA ligation // DNA unwinding involved in DNA replication // DNA repair // mitotic recombination // cellular response to DNA damage stimulus // chromosome segregation // apoptotic chromosome conden…	traceable author statement // not recorded // not recorded // inferred from direct assay // inferred from electronic annotation // non-traceable author statement // inferred from direct assay // inferred from direct assay // not recorded // non-traceable author statement // not recorded // inferred from direct assay // inferred from mutant phenotype // inferred from direct assay // inferred from …	GO:0000228 // GO:0000793 // GO:0005634 // GO:0005654 // GO:0005654 // GO:0005730 // GO:0005814 // GO:0009295 // GO:0009330 // GO:0019035 // GO:0043234 // GO:0005634 // GO:0005654 // GO:0005737 // GO:0009295 // GO:0043234 // GO:0005730	nuclear chromosome // condensed chromosome // nucleus // nucleoplasm // nucleoplasm // nucleolus // centriole // nucleoid // DNA topoisomerase complex (ATP-hydrolyzing) // viral integration complex // protein complex // nucleus // nucleoplasm // cytoplasm // nucleoid // protein complex // nucleolus	inferred from direct assay // inferred from electronic annotation // inferred from direct assay // inferred from direct assay // traceable author statement // inferred from direct assay // inferred from direct assay // not recorded // inferred from direct assay // non-traceable author statement // inferred from physical interaction // inferred from electronic annotation // inferred from electroni…	GO:0000287 // GO:0003677 // GO:0003682 // GO:0003918 // GO:0005080 // GO:0005515 // GO:0005524 // GO:0008022 // GO:0008094 // GO:0008144 // GO:0008301 // GO:0019899 // GO:0042803 // GO:0042826 // GO:0043130 // GO:0044822 // GO:0046982 // GO:0000166 // GO:0000287 // GO:0003677 // GO:0003916 // GO:0003918 // GO:0008301 // GO:0016853 // GO:0046872	magnesium ion binding // DNA binding // chromatin binding // DNA topoisomerase type II (ATP-hydrolyzing) activity // protein kinase C binding // protein binding // ATP binding // protein C-terminus binding // DNA-dependent ATPase activity // drug binding // DNA binding, bending // enzyme binding // protein homodimerization activity // histone deacetylase binding // ubiquitin binding // poly(A) RN…	inferred from direct assay // inferred from direct assay // inferred from direct assay // inferred from direct assay // inferred from physical interaction // inferred from physical interaction // inferred from electronic annotation // inferred from physical interaction // inferred from direct assay // inferred from direct assay // inferred from direct assay // inferred from physical interaction /…	---	---	---	---	---	16844312	34	1	main
16697695	7.76713	8.5854	8.02445	6.95594		8.17627	7.49019		NM_014875	KIF14	kinesin family member 14	1q32.1	NM_014875	RefSeq	Homo sapiens kinesin family member 14 (KIF14), mRNA.	100	100	29	29	FALSE	Hs.3104	bladder| embryonic tissue| eye| kidney| larynx| liver| lung| lymph node| mammary gland| ovary| prostate| testis| thymus| uterus| bladder carcinoma| breast (mammary gland) tumor| germ cell tumor| head and neck tumor| kidney tumor| liver tumor| lung tumor| normal| ovarian tumor| prostate cancer| retinoblastoma| soft tissue/muscle tissue tumor|embryoid body| blastocyst| fetus| adult	chr1	-	200520625	200589862	NM_014875	Q15058	GO:0007018 // GO:0008152 // GO:0030155 // GO:0030334 // GO:0032487 // GO:0033624 // GO:0034446 // GO:0045184	microtubule-based movement // metabolic process // regulation of cell adhesion // regulation of cell migration // regulation of Rap protein signal transduction // negative regulation of integrin activation // substrate adhesion-dependent cell spreading // establishment of protein localization	inferred from electronic annotation // inferred from electronic annotation // inferred from mutant phenotype // inferred from mutant phenotype // inferred from mutant phenotype // inferred from mutant phenotype // inferred from direct assay // inferred from direct assay	GO:0005634 // GO:0005737 // GO:0005819 // GO:0005871 // GO:0005874 // GO:0005856 // GO:0005874 // GO:0016020	nucleus // cytoplasm // spindle // kinesin complex // microtubule // cytoskeleton // microtubule // membrane	inferred from electronic annotation // inferred from electronic annotation // inferred from electronic annotation // inferred from electronic annotation // inferred from direct assay // inferred from electronic annotation // inferred from electronic annotation // inferred from direct assay	GO:0003777 // GO:0005515 // GO:0005524 // GO:0008017 // GO:0030165 // GO:0000166	microtubule motor activity // protein binding // ATP binding // microtubule binding // PDZ domain binding // nucleotide binding	inferred from electronic annotation // inferred from physical interaction // inferred from electronic annotation // inferred from electronic annotation // inferred from direct assay // inferred from electronic annotation	---	---	---	---	---	16697695	29	1	main
17045198	9.74653	10.4683	10.9167	9.40204		10.1074	10.1593		NM_001284301	ANLN	anillin, actin binding protein	7p15-p14	NM_001284301	RefSeq	Homo sapiens anillin, actin binding protein (ANLN), transcript variant 2, mRNA.	83	83	24	29	TRUE	Hs.62180	ascites| bladder| blood| bone| bone marrow| brain| cervix| connective tissue| embryonic tissue| esophagus| heart| intestine| kidney| liver| lung| lymph| lymph node| mammary gland| mouth| muscle| nerve| ovary| pharynx| placenta| prostate| salivary gland| skin| stomach| testis| thymus| thyroid| trachea| uterus| vascular| bladder carcinoma| breast (mammary gland) tumor| cervical tumor| chondrosarcom…	chr7	+	36429415	36493400	NM_001284301	Q9NQW6	GO:0000281 // GO:0000921 // GO:0007067 // GO:0007096 // GO:0007049 // GO:0051301	mitotic cytokinesis // septin ring assembly // mitotic nuclear division // regulation of exit from mitosis // cell cycle // cell division	inferred from direct assay // traceable author statement // inferred from electronic annotation // traceable author statement // inferred from electronic annotation // inferred from electronic annotation	GO:0005634 // GO:0005730 // GO:0005826 // GO:0015629 // GO:0043231 // GO:0005634 // GO:0005737 // GO:0005856 // GO:0005938	nucleus // nucleolus // actomyosin contractile ring // actin cytoskeleton // intracellular membrane-bounded organelle // nucleus // cytoplasm // cytoskeleton // cell cortex	inferred from direct assay // inferred from direct assay // inferred from direct assay // inferred from direct assay // inferred from direct assay // inferred from electronic annotation // inferred from electronic annotation // inferred from electronic annotation // inferred from electronic annotation	GO:0003779 // GO:0003779 // GO:0003779	actin binding // actin binding // actin binding	inferred from direct assay // inferred from electronic annotation // traceable author statement	---	---	---	---	---	17045198	29	1	main
16697544	6.76426	8.042	8.50868	7.14387		7.40313	7.82628		NM_001206846	ASPM	asp (abnormal spindle) homolog, microcephaly associated (Drosophila)	1q31	NM_001206846	RefSeq	Homo sapiens asp (abnormal spindle) homolog, microcephaly associated (Drosophila) (ASPM), transcript variant 2, mRNA.	100	88	29	29	FALSE	Hs.121028	adrenal gland| blood| bone| bone marrow| brain| connective tissue| embryonic tissue| esophagus| eye| heart| intestine| kidney| liver| lung| lymph| lymph node| mammary gland| mouth| muscle| placenta| prostate| skin| spleen| testis| thymus| umbilical cord| uterus| vascular|adrenal tumor| breast (mammary gland) tumor| chondrosarcoma| colorectal tumor| esophageal tumor| gastrointestinal tumor| germ c…	chr1	-	197053257	197115824	NM_001206846	Q8IZT6	GO:0001764 // GO:0002052 // GO:0007067 // GO:0007283 // GO:0021873 // GO:0045665 // GO:0045769 // GO:0048477 // GO:0048589 // GO:0051661 // GO:0090263 // GO:0007049 // GO:0007420 // GO:0051301	neuron migration // positive regulation of neuroblast proliferation // mitotic nuclear division // spermatogenesis // forebrain neuroblast division // negative regulation of neuron differentiation // negative regulation of asymmetric cell division // oogenesis // developmental growth // maintenance of centrosome location // positive regulation of canonical Wnt signaling pathway // cell cycle // b…	inferred from electronic annotation // inferred from electronic annotation // inferred from electronic annotation // inferred from electronic annotation // inferred from electronic annotation // inferred from electronic annotation // inferred from electronic annotation // inferred from electronic annotation // inferred from electronic annotation // inferred from electronic annotation // inferred …	GO:0000922 // GO:0005634 // GO:0005737 // GO:0030496 // GO:0005819 // GO:0005856	spindle pole // nucleus // cytoplasm // midbody // spindle // cytoskeleton	inferred from electronic annotation // inferred from electronic annotation // inferred from electronic annotation // inferred from electronic annotation // inferred from electronic annotation // inferred from electronic annotation	GO:0005516	calmodulin binding	inferred from electronic annotation	---	---	---	---	---	16697544	33	1	main
16817017	9.42232	10.6206	10.4773	9.35566		10.0215	9.91648		NM_005030	PLK1	polo-like kinase 1	16p12.2	NM_005030	RefSeq	Homo sapiens polo-like kinase 1 (PLK1), mRNA.	96	96	24	25	TRUE	Hs.592049	ascites| bladder| blood| bone| bone marrow| brain| cervix| connective tissue| embryonic tissue| esophagus| eye| heart| intestine| kidney| liver| lung| lymph| lymph node| mammary gland| mouth| muscle| ovary| pancreas| parathyroid| placenta| prostate| salivary gland| skin| spleen| stomach| testis| thymus| thyroid| tonsil| trachea| umbilical cord| uterus| vascular| bladder carcinoma| breast (mammary…	chr16	+	23690143	23701688	NM_005030	P53350	GO:0000070 // GO:0000086 // GO:0000086 // GO:0000122 // GO:0000278 // GO:0000281 // GO:0000910 // GO:0000910 // GO:0001578 // GO:0006468 // GO:0007067 // GO:0007067 // GO:0007077 // GO:0007091 // GO:0007092 // GO:0007094 // GO:0007346 // GO:0008283 // GO:0010800 // GO:0016567 // GO:0018105 // GO:0030071 // GO:0031145 // GO:0031572 // GO:0031648 // GO:0032436 // GO:0040038 // GO:0043066 // GO:0043…	mitotic sister chromatid segregation // G2/M transition of mitotic cell cycle // G2/M transition of mitotic cell cycle // negative regulation of transcription from RNA polymerase II promoter // mitotic cell cycle // mitotic cytokinesis // cytokinesis // cytokinesis // microtubule bundle formation // protein phosphorylation // mitotic nuclear division // mitotic nuclear division // mitotic nuclear…	inferred from mutant phenotype // inferred from direct assay // traceable author statement // inferred from mutant phenotype // traceable author statement // inferred from direct assay // inferred from direct assay // inferred from mutant phenotype // inferred from direct assay // inferred from direct assay // inferred from direct assay // inferred from mutant phenotype // traceable author statem…	GO:0000776 // GO:0000922 // GO:0000942 // GO:0005634 // GO:0005654 // GO:0005730 // GO:0005737 // GO:0005813 // GO:0005819 // GO:0005829 // GO:0005876 // GO:0015630 // GO:0030496 // GO:0051233 // GO:0000775 // GO:0000776 // GO:0000777 // GO:0000922 // GO:0005634 // GO:0005694 // GO:0005737 // GO:0005815 // GO:0005819 // GO:0005856 // GO:0030496 // GO:0051233	kinetochore // spindle pole // condensed nuclear chromosome outer kinetochore // nucleus // nucleoplasm // nucleolus // cytoplasm // centrosome // spindle // cytosol // spindle microtubule // microtubule cytoskeleton // midbody // spindle midzone // chromosome, centromeric region // kinetochore // condensed chromosome kinetochore // spindle pole // nucleus // chromosome // cytoplasm // microtubul…	inferred from direct assay // inferred from direct assay // inferred from direct assay // inferred from direct assay // traceable author statement // inferred from direct assay // inferred from direct assay // inferred from direct assay // inferred from direct assay // traceable author statement // inferred from direct assay // inferred from direct assay // inferred from direct assay // inferred …	GO:0004672 // GO:0004674 // GO:0004674 // GO:0004674 // GO:0005515 // GO:0005524 // GO:0008017 // GO:0010997 // GO:0016301 // GO:0019901 // GO:0000166 // GO:0004672 // GO:0004672 // GO:0004674 // GO:0004674 // GO:0016301 // GO:0016740 // GO:0016772	protein kinase activity // protein serine/threonine kinase activity // protein serine/threonine kinase activity // protein serine/threonine kinase activity // protein binding // ATP binding // microtubule binding // anaphase-promoting complex binding // kinase activity // protein kinase binding // nucleotide binding // protein kinase activity // protein kinase activity // protein serine/threonine…	inferred from direct assay // not recorded // inferred from direct assay // inferred from mutant phenotype // inferred from physical interaction // inferred from electronic annotation // inferred from direct assay // inferred from physical interaction // traceable author statement // inferred from physical interaction // inferred from electronic annotation // inferred from electronic annotation /…	GenMAPP	Cell_cycle_KEGG	---	---	---	16817017	25	1	main
17005865	9.47117	11.3411	11.5992	10.3654		10.4061	10.9823		NM_003521	HIST1H2BM	histone cluster 1, H2bm	6p22.1	NM_003521	RefSeq	Homo sapiens histone cluster 1, H2bm (HIST1H2BM), mRNA.	100	100	10	10	TRUE	Hs.182432	ascites| mammary gland| testis| breast (mammary gland) tumor| gastrointestinal tumor| adult	chr6	+	27782822	27783267	NM_003521	Q99879	GO:0006325 // GO:0006334 // GO:0006334	chromatin organization // nucleosome assembly // nucleosome assembly	traceable author statement // non-traceable author statement // inferred from electronic annotation	GO:0000786 // GO:0005634 // GO:0005654 // GO:0070062 // GO:0000786 // GO:0005634 // GO:0005694	nucleosome // nucleus // nucleoplasm // extracellular vesicular exosome // nucleosome // nucleus // chromosome	non-traceable author statement // inferred from direct assay // traceable author statement // inferred from direct assay // inferred from electronic annotation // inferred from electronic annotation // inferred from electronic annotation	GO:0003677 // GO:0046982 // GO:0003677	DNA binding // protein heterodimerization activity // DNA binding	non-traceable author statement // inferred from electronic annotation // inferred from electronic annotation	---	---	---	---	---	17005865	10	1	main
16793225	8.47097	9.21622	8.96122	7.63866		8.84359	8.29994		NM_001146015	DLGAP5	discs, large (Drosophila) homolog-associated protein 5	14q22.3	NM_001146015	RefSeq	Homo sapiens discs, large (Drosophila) homolog-associated protein 5 (DLGAP5), transcript variant 2, mRNA.	89	89	33	37	TRUE	Hs.77695	ascites| bladder| blood| bone| bone marrow| brain| connective tissue| embryonic tissue| eye| heart| intestine| kidney| liver| lung| lymph| lymph node| mammary gland| mouth| muscle| ovary| placenta| salivary gland| skin| spleen| stomach| testis| thymus| thyroid| trachea| uterus| vascular| breast (mammary gland) tumor| chondrosarcoma| colorectal tumor| gastrointestinal tumor| germ cell tumor| gliom…	chr14	-	55614830	55658396	NM_001146015	Q15398	GO:0000087 // GO:0000087 // GO:0007079 // GO:0007267 // GO:0008283 // GO:0016311 // GO:0016311 // GO:0045842 // GO:0007049	mitotic M phase // mitotic M phase // mitotic chromosome movement towards spindle pole // cell-cell signaling // cell proliferation // dephosphorylation // dephosphorylation // positive regulation of mitotic metaphase/anaphase transition // cell cycle	inferred from direct assay // inferred from sequence or structural similarity // non-traceable author statement // inferred from electronic annotation // non-traceable author statement // inferred from direct assay // inferred from sequence or structural similarity // non-traceable author statement // inferred from electronic annotation	GO:0005634 // GO:0005634 // GO:0005737 // GO:0005815 // GO:0031616 // GO:0031616 // GO:0005634 // GO:0005737 // GO:0005819 // GO:0005856	nucleus // nucleus // cytoplasm // microtubule organizing center // spindle pole centrosome // spindle pole centrosome // nucleus // cytoplasm // spindle // cytoskeleton	inferred from direct assay // inferred from sequence or structural similarity // inferred from direct assay // inferred from direct assay // inferred from direct assay // inferred from sequence or structural similarity // inferred from electronic annotation // inferred from electronic annotation // inferred from electronic annotation // inferred from electronic annotation	GO:0004721 // GO:0004721 // GO:0005515	phosphoprotein phosphatase activity // phosphoprotein phosphatase activity // protein binding	inferred from direct assay // inferred from sequence or structural similarity // inferred from physical interaction	---	---	---	---	---	16793225	37	1	main
17005858	6.97739	9.03152	9.33361	8.28735		8.00446	8.81048		NM_003509	HIST1H2AI	histone cluster 1, H2ai	6p22.1	NM_003509	RefSeq	Homo sapiens histone cluster 1, H2ai (HIST1H2AI), mRNA.	100	100	9	9	TRUE	Hs.534035	blood| brain| mouth| thymus| chondrosarcoma| head and neck tumor| normal| primitive neuroectodermal tumor of the CNS	chr6	+	27775899	27776445	NM_003509	P0C0S8	GO:0006334 // GO:0008150	nucleosome assembly // biological_process	inferred from electronic annotation // no biological data available	GO:0000786 // GO:0005634 // GO:0005634 // GO:0005694 // GO:0070062	nucleosome // nucleus // nucleus // chromosome // extracellular vesicular exosome	inferred from electronic annotation // inferred from direct assay // inferred from electronic annotation // inferred from electronic annotation // inferred from direct assay	GO:0003677 // GO:0005515 // GO:0019899 // GO:0046982	DNA binding // protein binding // enzyme binding // protein heterodimerization activity	inferred from electronic annotation // inferred from physical interaction // inferred from physical interaction // inferred from electronic annotation	---	---	---	---	---	17005858	9	3	main
16799598	7.72461	8.76229	8.35438	7.07948		8.24345	7.71693		NM_144508	CASC5	cancer susceptibility candidate 5	15q14	NM_144508	RefSeq	Homo sapiens cancer susceptibility candidate 5 (CASC5), transcript variant 2, mRNA.	86	86	25	29	TRUE	Hs.181855	bladder| blood| bone| bone marrow| brain| cervix| embryonic tissue| intestine| kidney| liver| lung| lymph node| mammary gland| mouth| muscle| ovary| pancreas| prostate| salivary gland| skin| stomach| testis| thymus| trachea| bladder carcinoma| breast (mammary gland) tumor| cervical tumor| chondrosarcoma| colorectal tumor| gastrointestinal tumor| germ cell tumor| head and neck tumor| kidney tumor|…	chr15	+	40886218	40956540	NM_144508	Q8NG31	GO:0000278 // GO:0001675 // GO:0006334 // GO:0007067 // GO:0008608 // GO:0010923 // GO:0034080 // GO:0034501 // GO:0071173 // GO:0007049 // GO:0007059 // GO:0051301	mitotic cell cycle // acrosome assembly // nucleosome assembly // mitotic nuclear division // attachment of spindle microtubules to kinetochore // negative regulation of phosphatase activity // centromere-specific nucleosome assembly // protein localization to kinetochore // spindle assembly checkpoint // cell cycle // chromosome segregation // cell division	traceable author statement // non-traceable author statement // traceable author statement // inferred from electronic annotation // inferred from direct assay // inferred from direct assay // traceable author statement // inferred from direct assay // inferred from direct assay // inferred from electronic annotation // inferred from electronic annotation // inferred from electronic annotation	GO:0000777 // GO:0001669 // GO:0005634 // GO:0005654 // GO:0005730 // GO:0005737 // GO:0005829 // GO:0070062 // GO:0000775 // GO:0000776 // GO:0005634 // GO:0005694	condensed chromosome kinetochore // acrosomal vesicle // nucleus // nucleoplasm // nucleolus // cytoplasm // cytosol // extracellular vesicular exosome // chromosome, centromeric region // kinetochore // nucleus // chromosome	inferred from electronic annotation // inferred from direct assay // inferred from direct assay // traceable author statement // inferred from direct assay // inferred from direct assay // traceable author statement // inferred from direct assay // inferred from electronic annotation // inferred from electronic annotation // inferred from electronic annotation // inferred from electronic annotati…	GO:0005515	protein binding	inferred from physical interaction	---	---	---	---	---	16799598	29	1	main
16965346	8.77852	9.76788	10.3301	8.99557		9.2732	9.66285		NM_022346	NCAPG	non-SMC condensin I complex, subunit G	4p15.33	NM_022346	RefSeq	Homo sapiens non-SMC condensin I complex, subunit G (NCAPG), transcript variant 1, mRNA.	90	90	19	21	TRUE	Hs.567567	ascites| blood| bone| bone marrow| brain| cervix| connective tissue| embryonic tissue| eye| heart| intestine| kidney| liver| lung| lymph| lymph node| mammary gland| mouth| muscle| ovary| pancreas| placenta| prostate| salivary gland| skin| stomach| testis| thymus| thyroid| tonsil| uterus| vascular| breast (mammary gland) tumor| cervical tumor| chondrosarcoma| colorectal tumor| gastrointestinal tum…	chr4	+	17812525	17846488	NM_022346	Q9BPX3	GO:0000278 // GO:0007076 // GO:0007076 // GO:0007049 // GO:0007067 // GO:0007076 // GO:0030261 // GO:0051301	mitotic cell cycle // mitotic chromosome condensation // mitotic chromosome condensation // cell cycle // mitotic nuclear division // mitotic chromosome condensation // chromosome condensation // cell division	traceable author statement // inferred from direct assay // non-traceable author statement // inferred from electronic annotation // inferred from electronic annotation // inferred from electronic annotation // inferred from electronic annotation // inferred from electronic annotation	GO:0000796 // GO:0005634 // GO:0005737 // GO:0005813 // GO:0005829 // GO:0015629 // GO:0000793 // GO:0000796 // GO:0005634 // GO:0005694 // GO:0005737 // GO:0016020	condensin complex // nucleus // cytoplasm // centrosome // cytosol // actin cytoskeleton // condensed chromosome // condensin complex // nucleus // chromosome // cytoplasm // membrane	inferred from direct assay // non-traceable author statement // inferred from direct assay // inferred from direct assay // traceable author statement // inferred from direct assay // inferred from electronic annotation // inferred from electronic annotation // inferred from electronic annotation // inferred from electronic annotation // inferred from electronic annotation // inferred from direct…	GO:0005515	protein binding	inferred from physical interaction	---	---	---	---	---	16965346	21	1	main
16800764	10.2618	10.6399	9.17337	9.17713		10.4508	9.17525		ENST00000341459	SLC24A5	solute carrier family 24 (sodium/potassium/calcium exchanger), member 5	15q21.1	ENST00000341459	ENSEMBL	ensembl_havana_transcript:known chromosome:GRCh38:15:48120972:48142672:1 gene:ENSG00000188467 gene_biotype:protein_coding transcript_biotype:protein_coding	78	78	18	23	TRUE	Hs.710240	brain| embryonic tissue| intestine| kidney| liver| lung| lymph node| mammary gland| pancreas| placenta| prostate| skin| stomach| testis| thymus| uterus| vascular| breast (mammary gland) tumor| colorectal tumor| gastrointestinal tumor| germ cell tumor| kidney tumor| liver tumor| lung tumor| normal| primitive neuroectodermal tumor of the CNS| prostate cancer| skin tumor| uterine tumor|embryoid body…	chr15	+	48413169	48434869	ENST00000341459	Q71RS6	GO:0006811 // GO:0006813 // GO:0006816 // GO:0034220 // GO:0035725 // GO:0050896 // GO:0055085 // GO:0006810 // GO:0006811 // GO:0006814 // GO:0055085	ion transport // potassium ion transport // calcium ion transport // ion transmembrane transport // sodium ion transmembrane transport // response to stimulus // transmembrane transport // transport // ion transport // sodium ion transport // transmembrane transport	traceable author statement // inferred from electronic annotation // inferred from electronic annotation // inferred from direct assay // inferred from direct assay // inferred from electronic annotation // traceable author statement // inferred from electronic annotation // inferred from electronic annotation // inferred from electronic annotation // inferred from electronic annotation	GO:0005802 // GO:0005886 // GO:0016021 // GO:0042470 // GO:0005794 // GO:0016020	trans-Golgi network // plasma membrane // integral component of membrane // melanosome // Golgi apparatus // membrane	inferred from direct assay // traceable author statement // inferred from electronic annotation // inferred from electronic annotation // inferred from electronic annotation // inferred from electronic annotation	GO:0008273 // GO:0015293 // GO:0015297	calcium, potassium:sodium antiporter activity // symporter activity // antiporter activity	inferred from direct assay // inferred from electronic annotation // inferred from electronic annotation	---	---	Pfam	IPR004837	Sodium/calcium exchanger membrane region	16800764	23	1	main
16979515	8.97353	9.57779	10.0992	8.57923		9.27566	9.3392		NM_001237	CCNA2	cyclin A2	4q27	NM_001237	RefSeq	Homo sapiens cyclin A2 (CCNA2), mRNA.	100	100	25	25	TRUE	Hs.58974	ascites| bladder| blood| bone| bone marrow| brain| cervix| connective tissue| embryonic tissue| esophagus| eye| intestine| kidney| liver| lung| lymph| lymph node| mammary gland| mouth| muscle| nerve| pancreas| placenta| prostate| salivary gland| skin| stomach| testis| thymus| uterus| vascular| bladder carcinoma| breast (mammary gland) tumor| cervical tumor| chondrosarcoma| colorectal tumor| esoph…	chr4	-	122737488	122745088	NM_001237	P20248	GO:0000079 // GO:0000086 // GO:0000278 // GO:0007067 // GO:0007095 // GO:0007265 // GO:0010389 // GO:0031100 // GO:0032355 // GO:0033762 // GO:0045893 // GO:0048146 // GO:0007049 // GO:0051301 // GO:0051726	regulation of cyclin-dependent protein serine/threonine kinase activity // G2/M transition of mitotic cell cycle // mitotic cell cycle // mitotic nuclear division // mitotic G2 DNA damage checkpoint // Ras protein signal transduction // regulation of G2/M transition of mitotic cell cycle // organ regeneration // response to estradiol // response to glucagon // positive regulation of transcription…	inferred from electronic annotation // traceable author statement // traceable author statement // inferred from electronic annotation // traceable author statement // inferred from expression pattern // inferred from electronic annotation // inferred from electronic annotation // inferred from electronic annotation // inferred from electronic annotation // inferred from electronic annotation // …	GO:0001939 // GO:0001940 // GO:0005634 // GO:0005654 // GO:0005737 // GO:0005634 // GO:0005737	female pronucleus // male pronucleus // nucleus // nucleoplasm // cytoplasm // nucleus // cytoplasm	inferred from electronic annotation // inferred from electronic annotation // inferred from direct assay // traceable author statement // inferred from direct assay // inferred from electronic annotation // inferred from electronic annotation	GO:0005515 // GO:0019901	protein binding // protein kinase binding	inferred from physical interaction // inferred from electronic annotation	GenMAPP	Cell_cycle_KEGG	---	---	---	16979515	25	1	main
16768406	10.6441	10.3248	9.93763	10.3714		10.4845	10.1545		NM_002345	LUM	lumican	12q21.33	NM_002345	RefSeq	Homo sapiens lumican (LUM), mRNA.	100	88	21	21	FALSE	Hs.406475	adipose tissue| adrenal gland| bladder| blood| bone| bone marrow| brain| cervix| connective tissue| ear| embryonic tissue| esophagus| eye| heart| intestine| kidney| larynx| liver| lung| lymph node| mammary gland| mouth| muscle| nerve| ovary| pancreas| parathyroid| pharynx| pituitary gland| placenta| prostate| salivary gland| skin| spleen| stomach| testis| thymus| trachea| umbilical cord| uterus| …	chr12	-	91496406	91505608	NM_002345	P51884	GO:0005975 // GO:0007601 // GO:0014070 // GO:0018146 // GO:0030198 // GO:0030199 // GO:0030203 // GO:0042339 // GO:0042340 // GO:0044281 // GO:0045944 // GO:0051216 // GO:0070848 // GO:0007601 // GO:0030199	carbohydrate metabolic process // visual perception // response to organic cyclic compound // keratan sulfate biosynthetic process // extracellular matrix organization // collagen fibril organization // glycosaminoglycan metabolic process // keratan sulfate metabolic process // keratan sulfate catabolic process // small molecule metabolic process // positive regulation of transcription from RNA p…	traceable author statement // inferred from electronic annotation // inferred from electronic annotation // traceable author statement // traceable author statement // non-traceable author statement // traceable author statement // traceable author statement // traceable author statement // traceable author statement // inferred from electronic annotation // inferred from electronic annotation //…	GO:0005576 // GO:0005576 // GO:0005578 // GO:0005583 // GO:0005615 // GO:0005796 // GO:0031012 // GO:0031012 // GO:0043202 // GO:0070062 // GO:0005576 // GO:0005578	extracellular region // extracellular region // proteinaceous extracellular matrix // fibrillar collagen trimer // extracellular space // Golgi lumen // extracellular matrix // extracellular matrix // lysosomal lumen // extracellular vesicular exosome // extracellular region // proteinaceous extracellular matrix	non-traceable author statement // traceable author statement // traceable author statement // inferred from direct assay // inferred from direct assay // traceable author statement // inferred from direct assay // inferred from sequence or structural similarity // traceable author statement // inferred from direct assay // inferred from electronic annotation // inferred from electronic annotation	GO:0005201 // GO:0005518	extracellular matrix structural constituent // collagen binding	non-traceable author statement // inferred from direct assay	---	---	---	---	---	16768406	24	1	main
16978568	7.84438	8.7874	8.48443	7.28878		8.31589	7.88661		NM_001286734	CENPE	centromere protein E, 312kDa	4q24-q25	NM_001286734	RefSeq	Homo sapiens centromere protein E, 312kDa (CENPE), transcript variant 2, mRNA.	91	91	42	46	TRUE	Hs.75573	adrenal gland| ascites| bone| bone marrow| brain| connective tissue| embryonic tissue| heart| intestine| kidney| liver| lung| lymph| lymph node| mammary gland| mouth| pancreas| placenta| prostate| skin| spleen| testis| thymus| thyroid| uterus| vascular|adrenal tumor| breast (mammary gland) tumor| chondrosarcoma| colorectal tumor| gastrointestinal tumor| germ cell tumor| glioma| head and neck tumo…	chr4	-	104026963	104119566	NM_001286734	Q02224	GO:0000089 // GO:0000278 // GO:0007018 // GO:0007079 // GO:0007080 // GO:0007275 // GO:0007596 // GO:0008152 // GO:0008152 // GO:0019886 // GO:0045860 // GO:0051382 // GO:0007018 // GO:0007049 // GO:0007067 // GO:0051301	mitotic metaphase // mitotic cell cycle // microtubule-based movement // mitotic chromosome movement towards spindle pole // mitotic metaphase plate congression // multicellular organismal development // blood coagulation // metabolic process // metabolic process // antigen processing and presentation of exogenous peptide antigen via MHC class II // positive regulation of protein kinase activity …	traceable author statement // traceable author statement // traceable author statement // traceable author statement // traceable author statement // inferred from electronic annotation // traceable author statement // inferred from electronic annotation // inferred from mutant phenotype // traceable author statement // inferred from mutant phenotype // non-traceable author statement // inferred …	GO:0000775 // GO:0000776 // GO:0000778 // GO:0000779 // GO:0000940 // GO:0005634 // GO:0005737 // GO:0005819 // GO:0005829 // GO:0005871 // GO:0005874 // GO:0015630 // GO:0000775 // GO:0000776 // GO:0000777 // GO:0000940 // GO:0005634 // GO:0005694 // GO:0005737 // GO:0005856 // GO:0005874 // GO:0016020	chromosome, centromeric region // kinetochore // condensed nuclear chromosome kinetochore // condensed chromosome, centromeric region // condensed chromosome outer kinetochore // nucleus // cytoplasm // spindle // cytosol // kinesin complex // microtubule // microtubule cytoskeleton // chromosome, centromeric region // kinetochore // condensed chromosome kinetochore // condensed chromosome outer …	inferred from direct assay // inferred from direct assay // inferred from electronic annotation // inferred from direct assay // traceable author statement // inferred from mutant phenotype // inferred from direct assay // inferred from electronic annotation // traceable author statement // inferred from electronic annotation // inferred from direct assay // inferred from direct assay // inferred…	GO:0003777 // GO:0005515 // GO:0005524 // GO:0008017 // GO:0043515 // GO:0000166 // GO:0003777	microtubule motor activity // protein binding // ATP binding // microtubule binding // kinetochore binding // nucleotide binding // microtubule motor activity	inferred from mutant phenotype // inferred from physical interaction // inferred from electronic annotation // inferred from electronic annotation // inferred from direct assay // inferred from electronic annotation // inferred from electronic annotation	---	---	---	---	---	16978568	46	1	main
16777278	7.43803	8.37705	9.12417	7.6395		7.90754	8.38183		NM_001166017	SKA3	spindle and kinetochore associated complex subunit 3	13q12.11	NM_001166017	RefSeq	Homo sapiens spindle and kinetochore associated complex subunit 3 (SKA3), transcript variant 2, mRNA.	100	77	17	17	FALSE	Hs.88523	adrenal gland| ascites| bladder| blood| bone| brain| cervix| connective tissue| embryonic tissue| eye| intestine| kidney| liver| lung| lymph node| mammary gland| pancreas| placenta| salivary gland| skin| stomach| testis| thymus| tonsil| uterus| vascular|adrenal tumor| breast (mammary gland) tumor| cervical tumor| chondrosarcoma| colorectal tumor| gastrointestinal tumor| germ cell tumor| glioma| k…	chr13	-	21727734	21750741	NM_001166017	Q8IX90	GO:0007059 // GO:0007067 // GO:0031110 // GO:0007049 // GO:0007067 // GO:0051301	chromosome segregation // mitotic nuclear division // regulation of microtubule polymerization or depolymerization // cell cycle // mitotic nuclear division // cell division	inferred from mutant phenotype // inferred from mutant phenotype // inferred from direct assay // inferred from electronic annotation // inferred from electronic annotation // inferred from electronic annotation	GO:0000940 // GO:0005737 // GO:0005876 // GO:0000775 // GO:0000776 // GO:0000777 // GO:0005694 // GO:0005819 // GO:0005856 // GO:0005874	condensed chromosome outer kinetochore // cytoplasm // spindle microtubule // chromosome, centromeric region // kinetochore // condensed chromosome kinetochore // chromosome // spindle // cytoskeleton // microtubule	inferred from direct assay // inferred from electronic annotation // inferred from direct assay // inferred from electronic annotation // inferred from electronic annotation // inferred from electronic annotation // inferred from electronic annotation // inferred from electronic annotation // inferred from electronic annotation // inferred from electronic annotation	GO:0005515	protein binding	inferred from physical interaction	---	---	---	---	---	16777278	22	1	main
16901957	7.18008	8.07119	8.42559	7.25623		7.62564	7.84091		NM_152515	CKAP2L	cytoskeleton associated protein 2-like	2q13	NM_152515	RefSeq	Homo sapiens cytoskeleton associated protein 2-like (CKAP2L), mRNA.	83	83	20	24	TRUE	Hs.434250	adrenal gland| bladder| blood| bone| bone marrow| brain| cervix| embryonic tissue| intestine| kidney| liver| lymph node| mammary gland| mouth| nerve| placenta| skin| spleen| testis| thymus| uterus|adrenal tumor| bladder carcinoma| breast (mammary gland) tumor| cervical tumor| chondrosarcoma| colorectal tumor| germ cell tumor| head and neck tumor| kidney tumor| leukemia| liver tumor| lymphoma| nor…	chr2	-	113493930	113522254	NM_152515	Q8IYA6	---	---	---	GO:0000922 // GO:0005737 // GO:0005813 // GO:0005856	spindle pole // cytoplasm // centrosome // cytoskeleton	inferred from electronic annotation // inferred from electronic annotation // inferred from direct assay // inferred from electronic annotation	---	---	---	---	---	---	---	---	16901957	24	1	main
16968680	8.13376	9.46432	6.94213	8.17429		8.79904	7.55821		NM_001251830	SPP1	secreted phosphoprotein 1	4q22.1	NM_001251830	RefSeq	Homo sapiens secreted phosphoprotein 1 (SPP1), transcript variant 5, mRNA.	80	80	16	20	TRUE	Hs.313	adipose tissue| adrenal gland| bladder| blood| bone| bone marrow| brain| cervix| connective tissue| ear| embryonic tissue| esophagus| eye| heart| intestine| kidney| larynx| liver| lung| lymph node| mammary gland| mouth| muscle| nerve| ovary| pancreas| pharynx| placenta| prostate| skin| spleen| stomach| testis| thymus| thyroid| trachea| umbilical cord| uterus| vascular|adrenal tumor| bladder carci…	chr4	+	88896802	88904563	NM_001251830	P10451	GO:0001649 // GO:0006954 // GO:0007155 // GO:0007566 // GO:0010811 // GO:0022617 // GO:0030198 // GO:0030593 // GO:0031214 // GO:0033280 // GO:0045780 // GO:0046697 // GO:0048545 // GO:0048685 // GO:0001503 // GO:0010033 // GO:0030154	osteoblast differentiation // inflammatory response // cell adhesion // embryo implantation // positive regulation of cell-substrate adhesion // extracellular matrix disassembly // extracellular matrix organization // neutrophil chemotaxis // biomineral tissue development // response to vitamin D // positive regulation of bone resorption // decidualization // response to steroid hormone // negati…	inferred from electronic annotation // inferred from electronic annotation // inferred from electronic annotation // traceable author statement // inferred from electronic annotation // traceable author statement // traceable author statement // inferred from electronic annotation // inferred from electronic annotation // inferred from direct assay // inferred from electronic annotation // tracea…	GO:0005576 // GO:0005615 // GO:0042995 // GO:0045177 // GO:0048471 // GO:0070062 // GO:0005576 // GO:0005615 // GO:0005737 // GO:0031988	extracellular region // extracellular space // cell projection // apical part of cell // perinuclear region of cytoplasm // extracellular vesicular exosome // extracellular region // extracellular space // cytoplasm // membrane-bounded vesicle	traceable author statement // inferred from direct assay // inferred from electronic annotation // inferred from electronic annotation // inferred from electronic annotation // inferred from direct assay // inferred from electronic annotation // inferred from electronic annotation // inferred from electronic annotation // inferred from electronic annotation	GO:0005125 // GO:0005515 // GO:0050840	cytokine activity // protein binding // extracellular matrix binding	inferred from electronic annotation // inferred from physical interaction // inferred from electronic annotation	GenMAPP	TGF_Beta_Signaling_Pathway	---	---	---	16968680	20	1	main
16688386	7.20058	8.02643	8.13078	6.72309		7.61351	7.42694		NM_001114120	DEPDC1	DEP domain containing 1	1p31.2	NM_001114120	RefSeq	Homo sapiens DEP domain containing 1 (DEPDC1), transcript variant 1, mRNA.	100	93	27	27	FALSE	Hs.445098	ascites| blood| bone| bone marrow| brain| connective tissue| embryonic tissue| esophagus| eye| intestine| kidney| liver| lung| lymph| lymph node| mammary gland| mouth| nerve| ovary| placenta| prostate| salivary gland| skin| stomach| testis| thymus| umbilical cord| uterus| vascular| breast (mammary gland) tumor| esophageal tumor| gastrointestinal tumor| germ cell tumor| head and neck tumor| kidney…	chr1	-	68939835	68962904	NM_001114120	Q5TB30	GO:0006351 // GO:0035556 // GO:0043547 // GO:0045892 // GO:0006355 // GO:0007165	transcription, DNA-templated // intracellular signal transduction // positive regulation of GTPase activity // negative regulation of transcription, DNA-templated // regulation of transcription, DNA-templated // signal transduction	inferred from electronic annotation // inferred from electronic annotation // inferred from electronic annotation // inferred from direct assay // inferred from electronic annotation // inferred from electronic annotation	GO:0005634 // GO:0017053 // GO:0005622 // GO:0005634	nucleus // transcriptional repressor complex // intracellular // nucleus	inferred from direct assay // inferred from direct assay // inferred from electronic annotation // inferred from electronic annotation	GO:0005096 // GO:0005515	GTPase activator activity // protein binding	inferred from electronic annotation // inferred from physical interaction	---	---	---	---	---	16688386	29	1	main
16725041	6.75355	8.44031	9.15506	7.52637		7.59693	8.34071		NM_001142703	FAM111B	family with sequence similarity 111, member B	11q12.1	NM_001142703	RefSeq	Homo sapiens family with sequence similarity 111, member B (FAM111B), transcript variant 2, mRNA.	100	42	8	8	FALSE	Hs.186579	bladder| blood| brain| embryonic tissue| heart| kidney| lymph node| mammary gland| prostate| spleen| testis| thymus| trachea| vascular| bladder carcinoma| germ cell tumor| normal| prostate cancer| blastocyst| fetus| neonate| adult	chr11	+	58874658	58894888	NM_001142703	Q6SJ93	GO:0008152	metabolic process	inferred from electronic annotation	---	---	---	GO:0003824	catalytic activity	inferred from electronic annotation	---	---	---	---	---	16725041	19	1	main
17067332	7.14187	8.2759	8.98082	7.72836		7.70889	8.35459		NM_001017420	ESCO2	establishment of sister chromatid cohesion N-acetyltransferase 2	8p21.1	NM_001017420	RefSeq	Homo sapiens establishment of sister chromatid cohesion N-acetyltransferase 2 (ESCO2), mRNA.	60	60	21	35	TRUE	Hs.99480	bladder| blood| bone| bone marrow| brain| ear| embryonic tissue| eye| intestine| kidney| liver| lung| lymph node| mammary gland| mouth| muscle| ovary| pancreas| placenta| salivary gland| skin| testis| thymus| uterus| bladder carcinoma| breast (mammary gland) tumor| chondrosarcoma| germ cell tumor| glioma| kidney tumor| leukemia| lung tumor| normal| ovarian tumor| skin tumor| soft tissue/muscle ti…	chr8	+	27629466	27670157	NM_001017420	Q56NI9	GO:0000278 // GO:0006275 // GO:0034421 // GO:0007049	mitotic cell cycle // regulation of DNA replication // post-translational protein acetylation // cell cycle	traceable author statement // inferred from mutant phenotype // inferred from mutant phenotype // inferred from electronic annotation	GO:0000785 // GO:0005634 // GO:0005654 // GO:0005794 // GO:0005634 // GO:0005694	chromatin // nucleus // nucleoplasm // Golgi apparatus // nucleus // chromosome	inferred from direct assay // inferred from direct assay // traceable author statement // inferred from direct assay // inferred from electronic annotation // inferred from electronic annotation	GO:0016746 // GO:0046872 // GO:0016740	transferase activity, transferring acyl groups // metal ion binding // transferase activity	inferred from electronic annotation // inferred from electronic annotation // inferred from electronic annotation	---	---	---	---	---	17067332	35	1	main
16961172	6.85873	5.56103	8.6212	8.27728		6.20988	8.44924		NM_000055	BCHE	butyrylcholinesterase	3q26.1-q26.2	NM_000055	RefSeq	Homo sapiens butyrylcholinesterase (BCHE), mRNA.	65	65	15	23	TRUE	Hs.420483	adrenal gland| bone| brain| connective tissue| ear| embryonic tissue| eye| heart| intestine| kidney| liver| lung| lymph| mammary gland| muscle| nerve| pancreas| prostate| skin| spleen| stomach| testis| thyroid| trachea| umbilical cord| uterus|adrenal tumor| breast (mammary gland) tumor| germ cell tumor| glioma| head and neck tumor| kidney tumor| liver tumor| lymphoma| non-neoplasia| normal| ovari…	chr3	-	165490692	165555260	NM_000055	P06276	GO:0007271 // GO:0007612 // GO:0008285 // GO:0014016 // GO:0019695 // GO:0042493 // GO:0043279 // GO:0044267 // GO:0050783 // GO:0050805 // GO:0051384 // GO:0051593 // GO:0007271 // GO:0007584 // GO:0019695 // GO:0019695 // GO:0008152	synaptic transmission, cholinergic // learning // negative regulation of cell proliferation // neuroblast differentiation // choline metabolic process // response to drug // response to alkaloid // cellular protein metabolic process // cocaine metabolic process // negative regulation of synaptic transmission // response to glucocorticoid // response to folic acid // synaptic transmission, choline…	not recorded // inferred from electronic annotation // inferred from electronic annotation // inferred from electronic annotation // not recorded // inferred from electronic annotation // inferred from electronic annotation // traceable author statement // traceable author statement // inferred from electronic annotation // inferred from electronic annotation // inferred from electronic annotatio…	GO:0005576 // GO:0005576 // GO:0005615 // GO:0005641 // GO:0005788 // GO:0016020 // GO:0072562 // GO:0005576 // GO:0005615 // GO:0005615 // GO:0005783 // GO:0005788 // GO:0005788	extracellular region // extracellular region // extracellular space // nuclear envelope lumen // endoplasmic reticulum lumen // membrane // blood microparticle // extracellular region // extracellular space // extracellular space // endoplasmic reticulum // endoplasmic reticulum lumen // endoplasmic reticulum lumen	non-traceable author statement // traceable author statement // not recorded // inferred from electronic annotation // not recorded // inferred from electronic annotation // inferred from direct assay // inferred from electronic annotation // --- // inferred from electronic annotation // inferred from electronic annotation // --- // inferred from electronic annotation	GO:0001540 // GO:0003824 // GO:0003990 // GO:0003990 // GO:0004104 // GO:0019899 // GO:0033265 // GO:0042802 // GO:0003990 // GO:0004104 // GO:0004104 // GO:0016787	beta-amyloid binding // catalytic activity // acetylcholinesterase activity // acetylcholinesterase activity // cholinesterase activity // enzyme binding // choline binding // identical protein binding // acetylcholinesterase activity // cholinesterase activity // cholinesterase activity // hydrolase activity	non-traceable author statement // non-traceable author statement // not recorded // inferred from sequence or structural similarity // inferred from direct assay // non-traceable author statement // inferred from electronic annotation // inferred from physical interaction // --- // inferred from electronic annotation // traceable author statement // inferred from electronic annotation	GenMAPP	Irinotecan_pathway_PharmGKB	---	---	---	16961172	23	1	main
16792079	6.63766	5.1637	3.21948	4.00082		5.90068	3.61015		OTTHUMT00000409618	RP11-116N8.4	novel transcript	---	OTTHUMT00000409618	Havana transcript	cdna:all chromosome:VEGA56:14:36061026:36067190:-1 Gene:OTTHUMG00000170569	100	100	21	21	TRUE	---	---	chr14	-	36530232	36536396	---	---	---	---	---	---	---	---	---	---	---	---	---	---	---	---	16792079	21	1	main
16939960	6.61074	8.00783	8.06857	6.95374		7.30929	7.51115		NM_020242	KIF15	kinesin family member 15	3p21.31	NM_020242	RefSeq	Homo sapiens kinesin family member 15 (KIF15), mRNA.	85	85	29	34	TRUE	Hs.658939	ascites| blood| bone| brain| embryonic tissue| esophagus| eye| intestine| kidney| liver| lung| lymph node| mammary gland| mouth| pancreas| placenta| prostate| salivary gland| skin| spleen| stomach| testis| thymus| uterus| vascular| breast (mammary gland) tumor| chondrosarcoma| colorectal tumor| esophageal tumor| gastrointestinal tumor| germ cell tumor| head and neck tumor| kidney tumor| liver tum…	chr3	+	44803209	44914868	NM_020242	Q9NS87	GO:0007018 // GO:0007067 // GO:0007596 // GO:0008152 // GO:0008152 // GO:0008283 // GO:0019886 // GO:0007018	microtubule-based movement // mitotic nuclear division // blood coagulation // metabolic process // metabolic process // cell proliferation // antigen processing and presentation of exogenous peptide antigen via MHC class II // microtubule-based movement	traceable author statement // traceable author statement // traceable author statement // inferred from electronic annotation // traceable author statement // traceable author statement // traceable author statement // inferred from electronic annotation	GO:0005813 // GO:0005819 // GO:0005829 // GO:0005873 // GO:0005874 // GO:0005737 // GO:0005856 // GO:0005871 // GO:0016020	centrosome // spindle // cytosol // plus-end kinesin complex // microtubule // cytoplasm // cytoskeleton // kinesin complex // membrane	traceable author statement // inferred from electronic annotation // traceable author statement // traceable author statement // inferred from electronic annotation // inferred from electronic annotation // inferred from electronic annotation // inferred from electronic annotation // inferred from direct assay	GO:0003677 // GO:0003774 // GO:0003777 // GO:0005524 // GO:0008017 // GO:0000166	DNA binding // motor activity // microtubule motor activity // ATP binding // microtubule binding // nucleotide binding	traceable author statement // traceable author statement // inferred from electronic annotation // inferred from electronic annotation // inferred from electronic annotation // inferred from electronic annotation	---	---	---	---	---	16939960	34	1	main
16860888	9.20094	9.80804	8.83914	9.18696		9.50449	9.01305		NM_001136007	FXYD3	FXYD domain containing ion transport regulator 3	19q13.12	NM_001136007	RefSeq	Homo sapiens FXYD domain containing ion transport regulator 3 (FXYD3), transcript variant 3, mRNA.	83	83	15	18	TRUE	Hs.301350	adipose tissue| ascites| bladder| blood| bone marrow| brain| connective tissue| esophagus| eye| heart| intestine| kidney| liver| lung| mammary gland| mouth| muscle| nerve| ovary| pancreas| pharynx| placenta| prostate| salivary gland| skin| stomach| trachea| uterus| bladder carcinoma| breast (mammary gland) tumor| chondrosarcoma| colorectal tumor| esophageal tumor| gastrointestinal tumor| germ cel…	chr19	+	35606732	35615228	NM_001136007	Q14802	GO:0006821 // GO:0034220 // GO:0050790 // GO:0055085 // GO:1902476 // GO:1902476 // GO:0006810 // GO:0006811 // GO:0006821	chloride transport // ion transmembrane transport // regulation of catalytic activity // transmembrane transport // chloride transmembrane transport // chloride transmembrane transport // transport // ion transport // chloride transport	traceable author statement // traceable author statement // inferred from electronic annotation // traceable author statement // inferred from electronic annotation // traceable author statement // inferred from electronic annotation // inferred from electronic annotation // inferred from electronic annotation	GO:0005789 // GO:0005886 // GO:0005887 // GO:0034707 // GO:0070062 // GO:0016020 // GO:0016021	endoplasmic reticulum membrane // plasma membrane // integral component of plasma membrane // chloride channel complex // extracellular vesicular exosome // membrane // integral component of membrane	inferred from electronic annotation // traceable author statement // traceable author statement // inferred from electronic annotation // inferred from direct assay // inferred from electronic annotation // inferred from electronic annotation	GO:0005254 // GO:0051117 // GO:0005216 // GO:0005254	chloride channel activity // ATPase binding // ion channel activity // chloride channel activity	inferred from electronic annotation // inferred from electronic annotation // inferred from electronic annotation // traceable author statement	---	---	---	---	---	16860888	18	1	main
17079293	5.90509	7.1615	7.89584	6.58891		6.53329	7.24237		NM_057749	CCNE2	cyclin E2	8q22.1	NM_057749	RefSeq	Homo sapiens cyclin E2 (CCNE2), mRNA.	67	67	18	27	TRUE	Hs.521693	bladder| bone| bone marrow| brain| cervix| embryonic tissue| eye| intestine| kidney| liver| lung| lymph node| mammary gland| muscle| ovary| pancreas| pharynx| placenta| prostate| skin| testis| thymus| thyroid| uterus| bladder carcinoma| breast (mammary gland) tumor| cervical tumor| colorectal tumor| germ cell tumor| glioma| head and neck tumor| leukemia| liver tumor| lung tumor| non-neoplasia| no…	chr8	-	95891998	95908906	NM_057749	O96020	GO:0000075 // GO:0000079 // GO:0000082 // GO:0000278 // GO:0006270 // GO:0051301 // GO:0000079 // GO:0000082 // GO:0007049 // GO:0051726	cell cycle checkpoint // regulation of cyclin-dependent protein serine/threonine kinase activity // G1/S transition of mitotic cell cycle // mitotic cell cycle // DNA replication initiation // cell division // regulation of cyclin-dependent protein serine/threonine kinase activity // G1/S transition of mitotic cell cycle // cell cycle // regulation of cell cycle	traceable author statement // inferred from electronic annotation // traceable author statement // traceable author statement // inferred from electronic annotation // inferred from electronic annotation // traceable author statement // inferred from electronic annotation // inferred from electronic annotation // inferred from electronic annotation	GO:0005654 // GO:0005829 // GO:0005634	nucleoplasm // cytosol // nucleus	traceable author statement // traceable author statement // inferred from electronic annotation	GO:0005515 // GO:0016538 // GO:0019901	protein binding // cyclin-dependent protein serine/threonine kinase regulator activity // protein kinase binding	inferred from physical interaction // inferred from electronic annotation // inferred from electronic annotation	GenMAPP // GenMAPP	Cell_cycle_KEGG // G1_to_S_cell_cycle_Reactome	---	---	---	17079293	27	1	main
16799793	9.19177	9.78415	10.3402	8.97804		9.48796	9.6591		NM_001243142	NUSAP1	nucleolar and spindle associated protein 1	15q15.1	NM_001243142	RefSeq	Homo sapiens nucleolar and spindle associated protein 1 (NUSAP1), transcript variant 4, mRNA.	96	96	24	25	TRUE	Hs.615092	adrenal gland| ascites| bladder| blood| bone| bone marrow| brain| cervix| connective tissue| embryonic tissue| esophagus| eye| heart| intestine| kidney| liver| lung| lymph| lymph node| mammary gland| mouth| muscle| ovary| pancreas| pharynx| placenta| prostate| skin| spleen| stomach| testis| thymus| thyroid| uterus| vascular|adrenal tumor| bladder carcinoma| breast (mammary gland) tumor| cervical …	chr15	+	41624892	41673248	NM_001243142	Q9BXS6	GO:0000070 // GO:0000281 // GO:0007076 // GO:0040001 // GO:0045840 // GO:0000226 // GO:0000281 // GO:0007049 // GO:0007067 // GO:0040001 // GO:0051301	mitotic sister chromatid segregation // mitotic cytokinesis // mitotic chromosome condensation // establishment of mitotic spindle localization // positive regulation of mitosis // microtubule cytoskeleton organization // mitotic cytokinesis // cell cycle // mitotic nuclear division // establishment of mitotic spindle localization // cell division	inferred from direct assay // inferred from direct assay // inferred from direct assay // inferred from direct assay // inferred from direct assay // inferred from electronic annotation // inferred from electronic annotation // inferred from electronic annotation // inferred from electronic annotation // inferred from electronic annotation // inferred from electronic annotation	GO:0005634 // GO:0005694 // GO:0005730 // GO:0005737 // GO:0005876 // GO:0005634 // GO:0005730 // GO:0005737 // GO:0005819 // GO:0005856 // GO:0005874	nucleus // chromosome // nucleolus // cytoplasm // spindle microtubule // nucleus // nucleolus // cytoplasm // spindle // cytoskeleton // microtubule	inferred from direct assay // inferred from electronic annotation // inferred from direct assay // inferred from direct assay // inferred from electronic annotation // inferred from electronic annotation // inferred from electronic annotation // inferred from electronic annotation // inferred from electronic annotation // inferred from electronic annotation // inferred from electronic annotation	GO:0003677 // GO:0008017 // GO:0044822	DNA binding // microtubule binding // poly(A) RNA binding	inferred from electronic annotation // inferred from electronic annotation // inferred from direct assay	---	---	---	---	---	16799793	25	1	main
16850517	5.69866	6.79693	7.50102	6.14055		6.24779	6.82079		NM_006101	NDC80	NDC80 kinetochore complex component	18p11.32	NM_006101	RefSeq	Homo sapiens NDC80 kinetochore complex component (NDC80), mRNA.	100	100	30	30	TRUE	Hs.414407	ascites| bladder| blood| bone| bone marrow| brain| cervix| connective tissue| embryonic tissue| heart| intestine| kidney| liver| lung| lymph| lymph node| mammary gland| mouth| muscle| ovary| pancreas| pharynx| placenta| prostate| skin| stomach| testis| thymus| thyroid| uterus| vascular| bladder carcinoma| breast (mammary gland) tumor| cervical tumor| chondrosarcoma| colorectal tumor| gastrointest…	chr18	+	2571510	2616634	NM_006101	O14777	GO:0000070 // GO:0000132 // GO:0000278 // GO:0007049 // GO:0007051 // GO:0007052 // GO:0007059 // GO:0007067 // GO:0008608 // GO:0048015 // GO:0007049 // GO:0007067 // GO:0051301	mitotic sister chromatid segregation // establishment of mitotic spindle orientation // mitotic cell cycle // cell cycle // spindle organization // mitotic spindle organization // chromosome segregation // mitotic nuclear division // attachment of spindle microtubules to kinetochore // phosphatidylinositol-mediated signaling // cell cycle // mitotic nuclear division // cell division	traceable author statement // inferred from mutant phenotype // traceable author statement // non-traceable author statement // non-traceable author statement // inferred from mutant phenotype // inferred from mutant phenotype // traceable author statement // inferred from mutant phenotype // non-traceable author statement // inferred from electronic annotation // inferred from electronic annotat…	GO:0000775 // GO:0000776 // GO:0000777 // GO:0000942 // GO:0005634 // GO:0005829 // GO:0031262 // GO:0000775 // GO:0000776 // GO:0000777 // GO:0005634 // GO:0005694 // GO:0016020	chromosome, centromeric region // kinetochore // condensed chromosome kinetochore // condensed nuclear chromosome outer kinetochore // nucleus // cytosol // Ndc80 complex // chromosome, centromeric region // kinetochore // condensed chromosome kinetochore // nucleus // chromosome // membrane	traceable author statement // inferred from direct assay // inferred from direct assay // inferred from direct assay // traceable author statement // traceable author statement // inferred from direct assay // inferred from electronic annotation // inferred from electronic annotation // inferred from electronic annotation // inferred from electronic annotation // inferred from electronic annotati…	GO:0005515	protein binding	inferred from physical interaction	---	---	---	---	---	16850517	30	1	main
16767335	8.77801	10.1379	5.13581	5.71759		9.45794	5.4267		NM_001005502	CPM	carboxypeptidase M	12q14.3	NM_001005502	RefSeq	Homo sapiens carboxypeptidase M (CPM), transcript variant 3, mRNA.	100	74	20	20	FALSE	Hs.654387	adrenal gland| bladder| blood| bone| bone marrow| brain| cervix| connective tissue| embryonic tissue| esophagus| eye| heart| intestine| kidney| liver| lung| lymph node| mammary gland| muscle| ovary| pharynx| placenta| prostate| skin| spleen| stomach| testis| thymus| uterus|adrenal tumor| breast (mammary gland) tumor| cervical tumor| chondrosarcoma| esophageal tumor| gastrointestinal tumor| germ c…	chr12	-	69235977	69365350	NM_001005502	P14384	GO:0006508 // GO:0009653	proteolysis // anatomical structure morphogenesis	inferred from electronic annotation // traceable author statement	GO:0005886 // GO:0031225 // GO:0070062 // GO:0005886 // GO:0016020	plasma membrane // anchored component of membrane // extracellular vesicular exosome // plasma membrane // membrane	inferred from electronic annotation // inferred from electronic annotation // inferred from direct assay // traceable author statement // inferred from electronic annotation	GO:0004180 // GO:0004181 // GO:0008270 // GO:0004180 // GO:0004181 // GO:0008233 // GO:0008237 // GO:0016787 // GO:0046872	carboxypeptidase activity // metallocarboxypeptidase activity // zinc ion binding // carboxypeptidase activity // metallocarboxypeptidase activity // peptidase activity // metallopeptidase activity // hydrolase activity // metal ion binding	traceable author statement // inferred from electronic annotation // inferred from electronic annotation // inferred from electronic annotation // traceable author statement // inferred from electronic annotation // inferred from electronic annotation // inferred from electronic annotation // inferred from electronic annotation	---	---	---	---	---	16767335	27	1	main
16868838	7.67301	8.80628	9.42091	7.80196		8.23964	8.61143		NM_182513	SPC24	SPC24, NDC80 kinetochore complex component	19p13.2	NM_182513	RefSeq	Homo sapiens SPC24, NDC80 kinetochore complex component (SPC24), mRNA.	85	85	22	26	TRUE	Hs.381225	ascites| blood| bone| brain| cervix| connective tissue| embryonic tissue| eye| intestine| kidney| liver| lung| lymph| ovary| pancreas| prostate| skin| stomach| testis| thymus| cervical tumor| chondrosarcoma| colorectal tumor| gastrointestinal tumor| germ cell tumor| glioma| kidney tumor| leukemia| liver tumor| lung tumor| lymphoma| normal| ovarian tumor| pancreatic tumor| primitive neuroectoderma…	chr19	-	11257444	11266484	NM_182513	Q8NBT2	GO:0000278 // GO:0007067 // GO:0007049 // GO:0051301	mitotic cell cycle // mitotic nuclear division // cell cycle // cell division	traceable author statement // inferred from electronic annotation // inferred from electronic annotation // inferred from electronic annotation	GO:0000777 // GO:0005634 // GO:0005730 // GO:0005829 // GO:0031262 // GO:0000775 // GO:0000776 // GO:0005634 // GO:0005694	condensed chromosome kinetochore // nucleus // nucleolus // cytosol // Ndc80 complex // chromosome, centromeric region // kinetochore // nucleus // chromosome	inferred from electronic annotation // inferred from direct assay // inferred from direct assay // traceable author statement // inferred from direct assay // inferred from electronic annotation // inferred from electronic annotation // inferred from electronic annotation // inferred from electronic annotation	GO:0005515	protein binding	inferred from physical interaction	---	---	---	---	---	16868838	26	1	main
16882975	7.62132	8.63392	8.72346	7.60881		8.12762	8.16613		NM_001281710	NCAPH	non-SMC condensin I complex, subunit H	2q11.2	NM_001281710	RefSeq	Homo sapiens non-SMC condensin I complex, subunit H (NCAPH), transcript variant 2, mRNA.	91	91	30	33	TRUE	Hs.308045	adrenal gland| ascites| bladder| blood| bone| bone marrow| brain| connective tissue| embryonic tissue| esophagus| eye| intestine| kidney| larynx| liver| lung| lymph node| mammary gland| mouth| muscle| ovary| pancreas| placenta| skin| spleen| stomach| testis| thymus| tonsil| uterus| vascular|adrenal tumor| breast (mammary gland) tumor| chondrosarcoma| colorectal tumor| esophageal tumor| gastrointe…	chr2	+	97001484	97041274	NM_001281710	Q15003	GO:0000278 // GO:0007076 // GO:0007049 // GO:0007067 // GO:0007076 // GO:0030261 // GO:0051301	mitotic cell cycle // mitotic chromosome condensation // cell cycle // mitotic nuclear division // mitotic chromosome condensation // chromosome condensation // cell division	traceable author statement // inferred from direct assay // inferred from electronic annotation // inferred from electronic annotation // inferred from electronic annotation // inferred from electronic annotation // inferred from electronic annotation	GO:0000796 // GO:0005634 // GO:0005737 // GO:0005829 // GO:0015630 // GO:0000796 // GO:0005694 // GO:0005737 // GO:0016020	condensin complex // nucleus // cytoplasm // cytosol // microtubule cytoskeleton // condensin complex // chromosome // cytoplasm // membrane	inferred from direct assay // inferred from electronic annotation // inferred from direct assay // traceable author statement // inferred from direct assay // inferred from electronic annotation // inferred from electronic annotation // inferred from electronic annotation // inferred from direct assay	GO:0005515	protein binding	inferred from physical interaction	---	---	---	---	---	16882975	33	1	main
16779546	6.76445	8.18887	8.48772	6.84046		7.47666	7.66409		NM_001042517	DIAPH3	diaphanous-related formin 3	13q21.2	NM_001042517	RefSeq	Homo sapiens diaphanous-related formin 3 (DIAPH3), transcript variant 1, mRNA.	100	87	26	26	FALSE	Hs.283127	adrenal gland| bladder| blood| bone| brain| connective tissue| embryonic tissue| intestine| kidney| liver| lung| lymph node| mammary gland| muscle| pancreas| placenta| prostate| skin| testis| thymus| uterus|adrenal tumor| bladder carcinoma| breast (mammary gland) tumor| chondrosarcoma| colorectal tumor| germ cell tumor| liver tumor| normal| pancreatic tumor| prostate cancer| skin tumor| soft tiss…	chr13	-	60239717	60738119	NM_001042517	Q9NSV4	GO:0007283 // GO:0030036 // GO:0016043	spermatogenesis // actin cytoskeleton organization // cellular component organization	inferred from electronic annotation // inferred from electronic annotation // inferred from electronic annotation	GO:0005634 // GO:0005829 // GO:0005737	nucleus // cytosol // cytoplasm	inferred from electronic annotation // inferred from electronic annotation // inferred from electronic annotation	GO:0003779 // GO:0017048	actin binding // Rho GTPase binding	inferred from electronic annotation // inferred from electronic annotation	---	---	---	---	---	16779546	30	1	main
16692636	9.30716	11.1105	10.2923	9.53433		10.2089	9.91331		NM_175065	HIST2H2AB	histone cluster 2, H2ab	1q21	NM_175065	RefSeq	Homo sapiens histone cluster 2, H2ab (HIST2H2AB), mRNA.	100	100	15	15	FALSE	Hs.664173	prostate| normal	chr1	-	149859019	149859466	NM_175065	Q8IUE6	GO:0006334 // GO:0008150	nucleosome assembly // biological_process	inferred from electronic annotation // no biological data available	GO:0000786 // GO:0005634 // GO:0070062 // GO:0005634 // GO:0005694	nucleosome // nucleus // extracellular vesicular exosome // nucleus // chromosome	inferred from electronic annotation // inferred from direct assay // inferred from direct assay // inferred from electronic annotation // inferred from electronic annotation	GO:0003677 // GO:0046982 // GO:0003674	DNA binding // protein heterodimerization activity // molecular_function	inferred from electronic annotation // inferred from electronic annotation // no biological data available	---	---	---	---	---	16692636	15	1	main
17015637	6.39939	8.3257	4.79313	5.04397		7.36254	4.91855		NM_017770	ELOVL2	ELOVL fatty acid elongase 2	6p24.2	NM_017770	RefSeq	Homo sapiens ELOVL fatty acid elongase 2 (ELOVL2), mRNA.	100	100	24	24	TRUE	Hs.656436	bladder| brain| ear| embryonic tissue| eye| kidney| liver| lung| mammary gland| muscle| nerve| parathyroid| placenta| prostate| testis| germ cell tumor| glioma| kidney tumor| liver tumor| normal| prostate cancer| retinoblastoma| blastocyst| fetus| adult	chr6	-	10980992	11044624	NM_017770	Q9NXB9	GO:0006636 // GO:0019432 // GO:0033559 // GO:0034626 // GO:0035338 // GO:0036109 // GO:0042761 // GO:0043651 // GO:0044255 // GO:0044281 // GO:0000038 // GO:0006629 // GO:0006631 // GO:0006633 // GO:0034626 // GO:0042761	unsaturated fatty acid biosynthetic process // triglyceride biosynthetic process // unsaturated fatty acid metabolic process // fatty acid elongation, polyunsaturated fatty acid // long-chain fatty-acyl-CoA biosynthetic process // alpha-linolenic acid metabolic process // very long-chain fatty acid biosynthetic process // linoleic acid metabolic process // cellular lipid metabolic process // smal…	inferred from electronic annotation // traceable author statement // traceable author statement // inferred from direct assay // traceable author statement // traceable author statement // inferred from direct assay // traceable author statement // traceable author statement // traceable author statement // inferred from electronic annotation // inferred from electronic annotation // inferred fro…	GO:0005783 // GO:0005789 // GO:0016021 // GO:0005783 // GO:0005789 // GO:0016020	endoplasmic reticulum // endoplasmic reticulum membrane // integral component of membrane // endoplasmic reticulum // endoplasmic reticulum membrane // membrane	inferred from direct assay // traceable author statement // inferred from electronic annotation // inferred from electronic annotation // inferred from electronic annotation // inferred from electronic annotation	GO:0005515 // GO:0009922 // GO:0009922 // GO:0016740 // GO:0016747	protein binding // fatty acid elongase activity // fatty acid elongase activity // transferase activity // transferase activity, transferring acyl groups other than amino-acyl groups	inferred from physical interaction // inferred from direct assay // inferred from electronic annotation // inferred from electronic annotation // inferred from electronic annotation	---	---	---	---	---	17015637	24	1	main
16677201	8.43992	9.45924	10.1696	9.02473		8.94958	9.59716		AF195765	DTL	denticleless E3 ubiquitin protein ligase homolog (Drosophila)	1q32	AF195765	GenBank	Homo sapiens L2DTL protein (L2DTL) mRNA, complete cds.	100	83	24	24	FALSE	Hs.656473	ascites| bladder| blood| bone| bone marrow| brain| cervix| connective tissue| embryonic tissue| eye| heart| intestine| kidney| larynx| liver| lung| lymph| lymph node| mammary gland| mouth| nerve| ovary| pancreas| placenta| prostate| skin| spleen| testis| thymus| trachea| umbilical cord| uterus| vascular| breast (mammary gland) tumor| cervical tumor| chondrosarcoma| colorectal tumor| gastrointesti…	chr1	+	212208919	212280742	AF195765	Q9NZJ0	GO:0000209 // GO:0000209 // GO:0006260 // GO:0006511 // GO:0006511 // GO:0006513 // GO:0006974 // GO:0009411 // GO:0019985 // GO:0031572 // GO:0051726 // GO:0006974 // GO:0016567	protein polyubiquitination // protein polyubiquitination // DNA replication // ubiquitin-dependent protein catabolic process // ubiquitin-dependent protein catabolic process // protein monoubiquitination // cellular response to DNA damage stimulus // response to UV // translesion synthesis // G2 DNA damage checkpoint // regulation of cell cycle // cellular response to DNA damage stimulus // prote…	inferred from direct assay // traceable author statement // inferred from electronic annotation // inferred from direct assay // traceable author statement // inferred from direct assay // inferred from direct assay // inferred from direct assay // inferred from direct assay // inferred from mutant phenotype // inferred from mutant phenotype // inferred from electronic annotation // inferred from…	GO:0005634 // GO:0005694 // GO:0005730 // GO:0005737 // GO:0005813 // GO:0031464 // GO:0031465 // GO:0031965 // GO:0043231 // GO:0005634 // GO:0005737 // GO:0005815 // GO:0005856 // GO:0016020	nucleus // chromosome // nucleolus // cytoplasm // centrosome // Cul4A-RING E3 ubiquitin ligase complex // Cul4B-RING E3 ubiquitin ligase complex // nuclear membrane // intracellular membrane-bounded organelle // nucleus // cytoplasm // microtubule organizing center // cytoskeleton // membrane	inferred from direct assay // inferred from electronic annotation // inferred from direct assay // inferred from direct assay // inferred from direct assay // inferred from direct assay // inferred from direct assay // inferred from electronic annotation // inferred from direct assay // inferred from electronic annotation // inferred from electronic annotation // inferred from electronic annotati…	GO:0004842 // GO:0005515	ubiquitin-protein transferase activity // protein binding	inferred from direct assay // inferred from physical interaction	---	---	---	---	---	16677201	29	1	main
16760048	7.47705	8.61536	8.90989	7.54656		8.0462	8.22822		ENST00000537018	FOXM1	forkhead box M1	12p13	ENST00000537018	ENSEMBL	havana:known chromosome:GRCh38:12:2864885:2874137:-1 gene:ENSG00000111206 gene_biotype:protein_coding transcript_biotype:processed_transcript	100	27	8	8	FALSE	Hs.239	adipose tissue| adrenal gland| ascites| bladder| blood| bone| brain| cervix| connective tissue| embryonic tissue| esophagus| eye| heart| intestine| kidney| larynx| liver| lung| lymph| lymph node| mammary gland| mouth| muscle| ovary| pancreas| placenta| prostate| salivary gland| skin| stomach| testis| thymus| thyroid| uterus| vascular|adrenal tumor| bladder carcinoma| breast (mammary gland) tumor|…	chr12	-	2966847	2986321	ENST00000537018	Q08050	GO:0000086 // GO:0000086 // GO:0000122 // GO:0000278 // GO:0001558 // GO:0001570 // GO:0001889 // GO:0006281 // GO:0006355 // GO:0006355 // GO:0006366 // GO:0006366 // GO:0006978 // GO:0007049 // GO:0007389 // GO:0008284 // GO:0009888 // GO:0032873 // GO:0042127 // GO:0045892 // GO:0045893 // GO:0045944 // GO:0045944 // GO:0046578 // GO:0051090 // GO:0051726 // GO:0071156 // GO:0090344 // GO:2000…	G2/M transition of mitotic cell cycle // G2/M transition of mitotic cell cycle // negative regulation of transcription from RNA polymerase II promoter // mitotic cell cycle // regulation of cell growth // vasculogenesis // liver development // DNA repair // regulation of transcription, DNA-templated // regulation of transcription, DNA-templated // transcription from RNA polymerase II promoter // …	inferred from direct assay // traceable author statement // inferred from mutant phenotype // traceable author statement // traceable author statement // not recorded // not recorded // inferred from electronic annotation // inferred from direct assay // traceable author statement // not recorded // inferred from direct assay // inferred from mutant phenotype // traceable author statement // not …	GO:0005634 // GO:0005654 // GO:0005667 // GO:0005730 // GO:0005737 // GO:0005634	nucleus // nucleoplasm // transcription factor complex // nucleolus // cytoplasm // nucleus	inferred from direct assay // traceable author statement // not recorded // inferred from direct assay // inferred from direct assay // inferred from electronic annotation	GO:0003677 // GO:0003677 // GO:0003690 // GO:0003700 // GO:0003700 // GO:0003705 // GO:0005515 // GO:0008134 // GO:0008301 // GO:0019901 // GO:0043565 // GO:0044212 // GO:0003677 // GO:0003700	DNA binding // DNA binding // double-stranded DNA binding // sequence-specific DNA binding transcription factor activity // sequence-specific DNA binding transcription factor activity // RNA polymerase II distal enhancer sequence-specific DNA binding transcription factor activity // protein binding // transcription factor binding // DNA binding, bending // protein kinase binding // sequence-speci…	inferred from direct assay // traceable author statement // not recorded // inferred from direct assay // traceable author statement // not recorded // inferred from physical interaction // not recorded // not recorded // inferred from physical interaction // inferred from electronic annotation // inferred from electronic annotation // inferred from electronic annotation // inferred from electron…	---	---	---	---	---	16760048	30	1	main
16909081	9.01409	7.49329	7.94093	8.17854		8.25369	8.05973		NM_001290263	DOCK10	dedicator of cytokinesis 10	2q36.2	NM_001290263	RefSeq	Homo sapiens dedicator of cytokinesis 10 (DOCK10), transcript variant DOCK10.2, mRNA.	84	84	46	55	TRUE	Hs.46578	adipose tissue| blood| bone| bone marrow| brain| connective tissue| embryonic tissue| eye| heart| intestine| kidney| larynx| lung| lymph node| mammary gland| muscle| ovary| pancreas| prostate| skin| spleen| testis| thymus| uterus| vascular| breast (mammary gland) tumor| chondrosarcoma| colorectal tumor| germ cell tumor| glioma| head and neck tumor| kidney tumor| leukemia| lung tumor| lymphoma| no…	chr2	-	225629807	225907330	NM_001290263	Q96BY6	GO:0007264 // GO:0030334 // GO:0032319 // GO:0032321 // GO:0043547	small GTPase mediated signal transduction // regulation of cell migration // regulation of Rho GTPase activity // positive regulation of Rho GTPase activity // positive regulation of GTPase activity	inferred from electronic annotation // inferred from direct assay // inferred from electronic annotation // inferred from electronic annotation // inferred from electronic annotation	GO:0070062 // GO:0016020	extracellular vesicular exosome // membrane	inferred from direct assay // inferred from direct assay	GO:0005089 // GO:0017048 // GO:0003674 // GO:0005085	Rho guanyl-nucleotide exchange factor activity // Rho GTPase binding // molecular_function // guanyl-nucleotide exchange factor activity	inferred from electronic annotation // inferred from electronic annotation // no biological data available // inferred from electronic annotation	---	---	---	---	---	16909081	55	1	main
16800355	7.5306	8.65142	9.46909	8.35241		8.09101	8.91075		NM_001167941	WDR76	WD repeat domain 76	15q15.3	NM_001167941	RefSeq	Homo sapiens WD repeat domain 76 (WDR76), transcript variant 2, mRNA.	88	88	28	32	TRUE	Hs.250154	blood| bone| bone marrow| brain| cervix| embryonic tissue| esophagus| eye| intestine| kidney| larynx| liver| lung| lymph node| mammary gland| mouth| muscle| ovary| pancreas| placenta| prostate| skin| spleen| stomach| testis| thymus| trachea| uterus| vascular| breast (mammary gland) tumor| cervical tumor| colorectal tumor| esophageal tumor| gastrointestinal tumor| germ cell tumor| head and neck tu…	chr15	+	44119112	44160617	NM_001167941	Q9H967	---	---	---	---	---	---	---	---	---	---	---	---	---	---	16800355	32	1	main
16936761	7.58841	6.4627	9.51977	9.61822		7.02555	9.569		NM_001253387	CHL1	cell adhesion molecule L1-like	3p26.1	NM_001253387	RefSeq	Homo sapiens cell adhesion molecule L1-like (CHL1), transcript variant 2, mRNA.	55	55	24	44	TRUE	Hs.148909 // Hs.731409	adipose tissue| adrenal gland| brain| connective tissue| embryonic tissue| eye| intestine| kidney| liver| lung| mammary gland| mouth| muscle| nerve| ovary| placenta| skin| spleen| testis| trachea| uterus| vascular| breast (mammary gland) tumor| germ cell tumor| glioma| head and neck tumor| kidney tumor| non-neoplasia| normal| ovarian tumor| primitive neuroectodermal tumor of the CNS| skin tumor| …	chr3	+	238279	451100	NM_001253387	O00533	GO:0001764 // GO:0007155 // GO:0007165 // GO:0007411 // GO:0008344 // GO:0035640 // GO:0043524 // GO:0050890 // GO:0007155 // GO:0007275 // GO:0007399 // GO:0007411 // GO:0030154 // GO:0031175	neuron migration // cell adhesion // signal transduction // axon guidance // adult locomotory behavior // exploration behavior // negative regulation of neuron apoptotic process // cognition // cell adhesion // multicellular organismal development // nervous system development // axon guidance // cell differentiation // neuron projection development	inferred from electronic annotation // inferred from electronic annotation // traceable author statement // traceable author statement // inferred from electronic annotation // inferred from electronic annotation // inferred from electronic annotation // inferred from electronic annotation // traceable author statement // inferred from electronic annotation // inferred from electronic annotation …	GO:0005578 // GO:0005886 // GO:0016021 // GO:0030425 // GO:0045177 // GO:0005576 // GO:0016020 // GO:0016021	proteinaceous extracellular matrix // plasma membrane // integral component of membrane // dendrite // apical part of cell // extracellular region // membrane // integral component of membrane	inferred from electronic annotation // inferred from electronic annotation // inferred from electronic annotation // inferred from electronic annotation // inferred from electronic annotation // inferred from electronic annotation // inferred from electronic annotation // traceable author statement	GO:0002020	protease binding	inferred from electronic annotation	---	---	---	---	---	16936761	44	1	main
17094889	7.76966	5.53307	3.40202	3.98707		6.65137	3.69454		NR_121120	LOC101927258	uncharacterized LOC101927258	9q21.13	NR_121120	RefSeq	Homo sapiens uncharacterized LOC101927258 (LOC101927258), transcript variant 1, long non-coding RNA.	100	100	24	24	TRUE	---	---	chr9	-	75486644	75489025	---	---	---	---	---	---	---	---	---	---	---	---	---	---	---	---	17094889	24	1	main
16953454	7.13227	8.58149	11.5372	11.0825		7.85688	11.3099		NM_033199	UCN2	urocortin 2	3p21.3	NM_033199	RefSeq	Homo sapiens urocortin 2 (UCN2), mRNA.	100	100	21	21	TRUE	Hs.631914	skin| testis| uterus| skin tumor| uterine tumor	chr3	-	48599151	48601206	NM_033199	Q96RP3	GO:0006171 // GO:0006950 // GO:0007586 // GO:0008283 // GO:0010629 // GO:0033685 // GO:0046882 // GO:0071385 // GO:0071456 // GO:0006950 // GO:0007586	cAMP biosynthetic process // response to stress // digestion // cell proliferation // negative regulation of gene expression // negative regulation of luteinizing hormone secretion // negative regulation of follicle-stimulating hormone secretion // cellular response to glucocorticoid stimulus // cellular response to hypoxia // response to stress // digestion	inferred from expression pattern // non-traceable author statement // non-traceable author statement // inferred from electronic annotation // inferred from electronic annotation // inferred from electronic annotation // inferred from electronic annotation // inferred from electronic annotation // inferred from electronic annotation // inferred from electronic annotation // inferred from electron…	GO:0005576 // GO:0005615 // GO:0005576	extracellular region // extracellular space // extracellular region	non-traceable author statement // inferred from electronic annotation // inferred from electronic annotation	GO:0005102 // GO:0005179 // GO:0042562 // GO:0051431 // GO:0001664	receptor binding // hormone activity // hormone binding // corticotropin-releasing hormone receptor 2 binding // G-protein coupled receptor binding	inferred from physical interaction // inferred from electronic annotation // inferred from physical interaction // inferred from electronic annotation // inferred from electronic annotation	---	---	---	---	---	16953454	21	1	main
16694617	6.82323	7.7263	8.44604	7.47879		7.27477	7.96241		NM_178229	IQGAP3	IQ motif containing GTPase activating protein 3	1q21.3	NM_178229	RefSeq	Homo sapiens IQ motif containing GTPase activating protein 3 (IQGAP3), mRNA.	100	94	31	31	FALSE	Hs.591495	adrenal gland| ascites| blood| bone| bone marrow| brain| connective tissue| embryonic tissue| intestine| kidney| liver| lung| lymph node| mammary gland| mouth| ovary| prostate| skin| stomach| testis| thyroid| uterus|adrenal tumor| breast (mammary gland) tumor| chondrosarcoma| colorectal tumor| gastrointestinal tumor| germ cell tumor| glioma| head and neck tumor| kidney tumor| leukemia| liver tumo…	chr1	-	156495197	156542396	NM_178229	Q86VI3	GO:0000082 // GO:0000187 // GO:0007265 // GO:0008361 // GO:0010628 // GO:0010629 // GO:0032320 // GO:0033601 // GO:0070371 // GO:0071310 // GO:0001934 // GO:0007165 // GO:0007264 // GO:0043547 // GO:0051056	G1/S transition of mitotic cell cycle // activation of MAPK activity // Ras protein signal transduction // regulation of cell size // positive regulation of gene expression // negative regulation of gene expression // positive regulation of Ras GTPase activity // positive regulation of mammary gland epithelial cell proliferation // ERK1 and ERK2 cascade // cellular response to organic substance /…	inferred from electronic annotation // inferred from electronic annotation // inferred from electronic annotation // inferred from electronic annotation // inferred from electronic annotation // inferred from electronic annotation // inferred from electronic annotation // inferred from electronic annotation // inferred from electronic annotation // inferred from electronic annotation // inferred …	GO:0005737 // GO:0005911 // GO:0016328 // GO:0005622	cytoplasm // cell-cell junction // lateral plasma membrane // intracellular	inferred from electronic annotation // inferred from electronic annotation // inferred from electronic annotation // inferred from electronic annotation	GO:0005099 // GO:0005516 // GO:0017048 // GO:0005096 // GO:0017016	Ras GTPase activator activity // calmodulin binding // Rho GTPase binding // GTPase activator activity // Ras GTPase binding	inferred from electronic annotation // inferred from electronic annotation // inferred from electronic annotation // inferred from electronic annotation // inferred from electronic annotation	---	---	---	---	---	16694617	33	1	main
17087413	7.09181	8.53143	7.76063	7.9289		7.81162	7.84476		NM_024642	GALNT12	polypeptide N-acetylgalactosaminyltransferase 12	9q22.33	NM_024642	RefSeq	Homo sapiens polypeptide N-acetylgalactosaminyltransferase 12 (GALNT12), mRNA.	92	92	24	26	TRUE	Hs.47099	bone marrow| brain| embryonic tissue| heart| intestine| kidney| lung| lymph node| mouth| muscle| ovary| pancreas| pituitary gland| prostate| salivary gland| stomach| testis| thyroid| trachea| uterus| vascular| colorectal tumor| gastrointestinal tumor| germ cell tumor| glioma| head and neck tumor| kidney tumor| leukemia| lung tumor| lymphoma| non-neoplasia| normal| ovarian tumor| pancreatic tumor|…	chr9	+	101569981	101612363	NM_024642	Q8IXK2	GO:0016266 // GO:0043687 // GO:0044267 // GO:0006486 // GO:0008152	O-glycan processing // post-translational protein modification // cellular protein metabolic process // protein glycosylation // metabolic process	traceable author statement // traceable author statement // traceable author statement // inferred from electronic annotation // inferred from electronic annotation	GO:0000139 // GO:0016021 // GO:0000139 // GO:0005794 // GO:0016020	Golgi membrane // integral component of membrane // Golgi membrane // Golgi apparatus // membrane	traceable author statement // inferred from electronic annotation // inferred from electronic annotation // inferred from electronic annotation // inferred from electronic annotation	GO:0004653 // GO:0046872 // GO:0016740 // GO:0016757	polypeptide N-acetylgalactosaminyltransferase activity // metal ion binding // transferase activity // transferase activity, transferring glycosyl groups	inferred from electronic annotation // inferred from electronic annotation // inferred from electronic annotation // inferred from electronic annotation	---	---	---	---	---	17087413	26	1	main
17080648	9.02362	8.27154	8.59193	8.57619		8.64758	8.58406		NM_005328	HAS2	hyaluronan synthase 2	8q24.12	NM_005328	RefSeq	Homo sapiens hyaluronan synthase 2 (HAS2), mRNA.	86	86	19	22	TRUE	Hs.159226	bone| bone marrow| cervix| embryonic tissue| liver| lung| muscle| skin| thyroid| vascular| cervical tumor| chondrosarcoma| germ cell tumor| head and neck tumor| normal| soft tissue/muscle tissue tumor|embryoid body| blastocyst| fetus| adult	chr8	-	122624356	122653680	NM_005328	Q92819	GO:0001570 // GO:0001822 // GO:0008284 // GO:0030213 // GO:0030213 // GO:0030213 // GO:0030213 // GO:0030335 // GO:0035810 // GO:0036120 // GO:0036302 // GO:0045226 // GO:0060349 // GO:0070295 // GO:0071347 // GO:0071356 // GO:0071498 // GO:0085029 // GO:0090500 // GO:1900625 // GO:0001570 // GO:0001822 // GO:0030212 // GO:0035810 // GO:0036302 // GO:0045226 // GO:0070295 // GO:0085029 // GO:0090…	vasculogenesis // kidney development // positive regulation of cell proliferation // hyaluronan biosynthetic process // hyaluronan biosynthetic process // hyaluronan biosynthetic process // hyaluronan biosynthetic process // positive regulation of cell migration // positive regulation of urine volume // cellular response to platelet-derived growth factor stimulus // atrioventricular canal develop…	inferred from sequence or structural similarity // inferred from sequence or structural similarity // inferred from mutant phenotype // inferred from direct assay // inferred from electronic annotation // inferred from mutant phenotype // inferred from sequence or structural similarity // inferred from mutant phenotype // inferred from sequence or structural similarity // inferred from direct ass…	GO:0005887 // GO:0005887 // GO:0016020 // GO:0016021	integral component of plasma membrane // integral component of plasma membrane // membrane // integral component of membrane	inferred from direct assay // inferred from electronic annotation // inferred from electronic annotation // inferred from electronic annotation	GO:0050501 // GO:0050501 // GO:0016740 // GO:0016757 // GO:0050501	hyaluronan synthase activity // hyaluronan synthase activity // transferase activity // transferase activity, transferring glycosyl groups // hyaluronan synthase activity	inferred from mutant phenotype // inferred from sequence or structural similarity // inferred from electronic annotation // inferred from electronic annotation // inferred from electronic annotation	---	---	---	---	---	17080648	22	1	main
17084904	7.38655	8.12202	8.96262	8.08133		7.75428	8.52198		NM_001256685	MELK	maternal embryonic leucine zipper kinase	9p13.2	NM_001256685	RefSeq	Homo sapiens maternal embryonic leucine zipper kinase (MELK), transcript variant 2, mRNA.	84	84	26	31	TRUE	Hs.184339	ascites| bladder| blood| bone| bone marrow| brain| cervix| connective tissue| embryonic tissue| esophagus| eye| heart| intestine| kidney| liver| lung| lymph| lymph node| mammary gland| mouth| muscle| ovary| pharynx| placenta| prostate| skin| spleen| stomach| testis| thymus| trachea| uterus| vascular| breast (mammary gland) tumor| cervical tumor| chondrosarcoma| colorectal tumor| esophageal tumor|…	chr9	+	36572859	36677679	NM_001256685	Q14680	GO:0000086 // GO:0006915 // GO:0008283 // GO:0008631 // GO:0018108 // GO:0018108 // GO:0030097 // GO:0043065 // GO:0046777 // GO:0061351 // GO:0006468 // GO:0006915 // GO:0007049 // GO:0016310 // GO:0043065 // GO:0061351	G2/M transition of mitotic cell cycle // apoptotic process // cell proliferation // intrinsic apoptotic signaling pathway in response to oxidative stress // peptidyl-tyrosine phosphorylation // peptidyl-tyrosine phosphorylation // hemopoiesis // positive regulation of apoptotic process // protein autophosphorylation // neural precursor cell proliferation // protein phosphorylation // apoptotic pr…	traceable author statement // inferred from direct assay // inferred from direct assay // inferred from electronic annotation // inferred from direct assay // inferred from electronic annotation // inferred from sequence or structural similarity // inferred from sequence or structural similarity // inferred from direct assay // inferred from sequence or structural similarity // inferred from elec…	GO:0005886 // GO:0005938 // GO:0005737 // GO:0005886 // GO:0016020 // GO:0016020	plasma membrane // cell cortex // cytoplasm // plasma membrane // membrane // membrane	inferred from direct assay // inferred from direct assay // inferred from electronic annotation // inferred from electronic annotation // inferred from direct assay // inferred from electronic annotation	GO:0004674 // GO:0004715 // GO:0005509 // GO:0005515 // GO:0005524 // GO:0008289 // GO:0000166 // GO:0004672 // GO:0004674 // GO:0004715 // GO:0016301 // GO:0016740 // GO:0016772	protein serine/threonine kinase activity // non-membrane spanning protein tyrosine kinase activity // calcium ion binding // protein binding // ATP binding // lipid binding // nucleotide binding // protein kinase activity // protein serine/threonine kinase activity // non-membrane spanning protein tyrosine kinase activity // kinase activity // transferase activity // transferase activity, transfe…	inferred from direct assay // inferred from direct assay // inferred from direct assay // inferred from physical interaction // inferred from electronic annotation // inferred from electronic annotation // inferred from electronic annotation // inferred from electronic annotation // inferred from electronic annotation // inferred from electronic annotation // inferred from electronic annotation /…	---	---	---	---	---	17084904	31	1	main
16722299	5.86829	7.1886	7.57621	7.50853		6.52844	7.54237		NM_000922	PDE3B	phosphodiesterase 3B, cGMP-inhibited	11p15.1	NM_000922	RefSeq	Homo sapiens phosphodiesterase 3B, cGMP-inhibited (PDE3B), mRNA.	100	94	32	32	FALSE	Hs.445711	bladder| blood| bone| bone marrow| brain| cervix| connective tissue| eye| heart| intestine| kidney| liver| lung| mammary gland| mouth| muscle| pancreas| pituitary gland| placenta| prostate| skin| stomach| testis| thymus| vascular| breast (mammary gland) tumor| cervical tumor| chondrosarcoma| colorectal tumor| germ cell tumor| head and neck tumor| kidney tumor| leukemia| liver tumor| normal| pancr…	chr11	+	14665269	14893605	NM_000922	Q13370	GO:0001525 // GO:0006198 // GO:0007162 // GO:0007596 // GO:0008286 // GO:0016525 // GO:0031018 // GO:0032869 // GO:0033629 // GO:0042593 // GO:0043951 // GO:0050796 // GO:0050995 // GO:0007165 // GO:0008152	angiogenesis // cAMP catabolic process // negative regulation of cell adhesion // blood coagulation // insulin receptor signaling pathway // negative regulation of angiogenesis // endocrine pancreas development // cellular response to insulin stimulus // negative regulation of cell adhesion mediated by integrin // glucose homeostasis // negative regulation of cAMP-mediated signaling // regulation…	inferred from electronic annotation // inferred from expression pattern // inferred from mutant phenotype // traceable author statement // traceable author statement // inferred from mutant phenotype // inferred from electronic annotation // inferred from sequence or structural similarity // inferred by curator // inferred from electronic annotation // inferred by curator // inferred from electro…	GO:0005783 // GO:0005794 // GO:0005829 // GO:0016020 // GO:0016021 // GO:0032045 // GO:0016020	endoplasmic reticulum // Golgi apparatus // cytosol // membrane // integral component of membrane // guanyl-nucleotide exchange factor complex // membrane	inferred from sequence or structural similarity // inferred from sequence or structural similarity // traceable author statement // inferred from direct assay // inferred from electronic annotation // inferred from direct assay // inferred from electronic annotation	GO:0004114 // GO:0004119 // GO:0005515 // GO:0043422 // GO:0046872 // GO:0003824 // GO:0004114 // GO:0008081 // GO:0016787	3',5'-cyclic-nucleotide phosphodiesterase activity // cGMP-inhibited cyclic-nucleotide phosphodiesterase activity // protein binding // protein kinase B binding // metal ion binding // catalytic activity // 3',5'-cyclic-nucleotide phosphodiesterase activity // phosphoric diester hydrolase activity // hydrolase activity	traceable author statement // traceable author statement // inferred from physical interaction // inferred from sequence or structural similarity // inferred from electronic annotation // inferred from electronic annotation // inferred from electronic annotation // inferred from electronic annotation // inferred from electronic annotation	---	---	---	---	---	16722299	34	1	main
16877019	8.55864	9.31706	9.84896	8.81604		8.93785	9.3325		NM_001034	RRM2	ribonucleotide reductase M2	2p25-p24	NM_001034	RefSeq	Homo sapiens ribonucleotide reductase M2 (RRM2), transcript variant 2, mRNA.	55	55	17	31	TRUE	Hs.226390	adrenal gland| ascites| bladder| blood| bone| bone marrow| brain| cervix| connective tissue| embryonic tissue| esophagus| eye| heart| intestine| kidney| liver| lung| lymph| lymph node| mammary gland| mouth| muscle| nerve| ovary| pancreas| placenta| prostate| salivary gland| skin| spleen| stomach| testis| thymus| thyroid| tonsil| trachea| umbilical cord| uterus| vascular|adrenal tumor| bladder car…	chr2	+	10262455	10271546	NM_001034	P31350	GO:0000082 // GO:0000083 // GO:0000278 // GO:0006260 // GO:0009186 // GO:0009263 // GO:0015949 // GO:0044281 // GO:0051290 // GO:0055086 // GO:0055114 // GO:0009262 // GO:0009263 // GO:0051259	G1/S transition of mitotic cell cycle // regulation of transcription involved in G1/S transition of mitotic cell cycle // mitotic cell cycle // DNA replication // deoxyribonucleoside diphosphate metabolic process // deoxyribonucleotide biosynthetic process // nucleobase-containing small molecule interconversion // small molecule metabolic process // protein heterotetramerization // nucleobase-con…	traceable author statement // traceable author statement // traceable author statement // inferred from electronic annotation // inferred from electronic annotation // inferred from sequence or structural similarity // traceable author statement // traceable author statement // inferred from electronic annotation // traceable author statement // inferred from electronic annotation // inferred fro…	GO:0005634 // GO:0005654 // GO:0005737 // GO:0005829 // GO:0005737	nucleus // nucleoplasm // cytoplasm // cytosol // cytoplasm	inferred from direct assay // traceable author statement // inferred from direct assay // traceable author statement // inferred from electronic annotation	GO:0004748 // GO:0004748 // GO:0005515 // GO:0046872 // GO:0004748 // GO:0016491	ribonucleoside-diphosphate reductase activity, thioredoxin disulfide as acceptor // ribonucleoside-diphosphate reductase activity, thioredoxin disulfide as acceptor // protein binding // metal ion binding // ribonucleoside-diphosphate reductase activity, thioredoxin disulfide as acceptor // oxidoreductase activity	inferred from sequence or structural similarity // non-traceable author statement // inferred from physical interaction // inferred from electronic annotation // inferred from electronic annotation // inferred from electronic annotation	HumanCyc // HumanCyc // HumanCyc	PWY-6125 // PWY-6126 // PWY0-166	---	---	---	16877019	31	1	main
16707468	8.38939	9.42792	10.0965	8.74403		8.90866	9.42024		NM_004523	KIF11	kinesin family member 11	10q24.1	NM_004523	RefSeq	Homo sapiens kinesin family member 11 (KIF11), mRNA.	100	100	37	37	FALSE	Hs.8878	adrenal gland| ascites| blood| bone| bone marrow| brain| cervix| connective tissue| embryonic tissue| esophagus| eye| heart| intestine| kidney| liver| lung| lymph node| mammary gland| mouth| muscle| ovary| pancreas| pharynx| placenta| prostate| skin| stomach| testis| thymus| trachea| uterus| vascular|adrenal tumor| breast (mammary gland) tumor| cervical tumor| chondrosarcoma| colorectal tumor| es…	chr10	+	94352825	94415152	NM_004523	P52732	GO:0007018 // GO:0007051 // GO:0007052 // GO:0007067 // GO:0007100 // GO:0007596 // GO:0008152 // GO:0008152 // GO:0019886 // GO:0090307 // GO:0007018 // GO:0007049 // GO:0007067 // GO:0051301	microtubule-based movement // spindle organization // mitotic spindle organization // mitotic nuclear division // mitotic centrosome separation // blood coagulation // metabolic process // metabolic process // antigen processing and presentation of exogenous peptide antigen via MHC class II // spindle assembly involved in mitosis // microtubule-based movement // cell cycle // mitotic nuclear divi…	traceable author statement // inferred from mutant phenotype // traceable author statement // traceable author statement // inferred from electronic annotation // traceable author statement // inferred from electronic annotation // traceable author statement // traceable author statement // inferred from direct assay // inferred from electronic annotation // inferred from electronic annotation //…	GO:0000922 // GO:0005737 // GO:0005819 // GO:0005829 // GO:0005871 // GO:0005874 // GO:0005876 // GO:0000922 // GO:0005737 // GO:0005819 // GO:0005856 // GO:0005871 // GO:0005874 // GO:0016020	spindle pole // cytoplasm // spindle // cytosol // kinesin complex // microtubule // spindle microtubule // spindle pole // cytoplasm // spindle // cytoskeleton // kinesin complex // microtubule // membrane	inferred from direct assay // inferred from direct assay // inferred from direct assay // traceable author statement // inferred from electronic annotation // inferred from direct assay // inferred from direct assay // inferred from electronic annotation // inferred from electronic annotation // traceable author statement // inferred from electronic annotation // traceable author statement // inf…	GO:0003777 // GO:0005524 // GO:0008017 // GO:0019901 // GO:0032403 // GO:0000166 // GO:0003777	microtubule motor activity // ATP binding // microtubule binding // protein kinase binding // protein complex binding // nucleotide binding // microtubule motor activity	inferred from electronic annotation // inferred from electronic annotation // inferred from electronic annotation // inferred from physical interaction // inferred from direct assay // inferred from electronic annotation // traceable author statement	---	---	---	---	---	16707468	37	1	main
16677425	7.47363	8.57398	9.02536	7.97882		8.0238	8.50209		NM_016343	CENPF	centromere protein F, 350/400kDa	1q41	NM_016343	RefSeq	Homo sapiens centromere protein F, 350/400kDa (CENPF), mRNA.	100	85	17	17	FALSE	Hs.497741	adrenal gland| ascites| bladder| blood| bone| bone marrow| brain| connective tissue| embryonic tissue| esophagus| eye| heart| intestine| kidney| liver| lung| lymph node| mammary gland| muscle| ovary| pancreas| placenta| prostate| salivary gland| skin| spleen| stomach| testis| thymus| uterus|adrenal tumor| bladder carcinoma| breast (mammary gland) tumor| chondrosarcoma| colorectal tumor| esophagea…	chr1	+	214776532	214837931	NM_016343	P49454	GO:0000085 // GO:0000086 // GO:0000087 // GO:0000087 // GO:0000278 // GO:0000278 // GO:0006260 // GO:0007059 // GO:0007059 // GO:0007067 // GO:0007094 // GO:0007517 // GO:0008283 // GO:0010389 // GO:0015031 // GO:0015031 // GO:0016202 // GO:0030154 // GO:0042493 // GO:0045892 // GO:0051310 // GO:0051382 // GO:0051726 // GO:0007049 // GO:0007275 // GO:0016202 // GO:0051301	mitotic G2 phase // G2/M transition of mitotic cell cycle // mitotic M phase // mitotic M phase // mitotic cell cycle // mitotic cell cycle // DNA replication // chromosome segregation // chromosome segregation // mitotic nuclear division // mitotic spindle assembly checkpoint // muscle organ development // cell proliferation // regulation of G2/M transition of mitotic cell cycle // protein trans…	inferred from mutant phenotype // traceable author statement // inferred from direct assay // inferred from mutant phenotype // inferred from mutant phenotype // traceable author statement // inferred from electronic annotation // inferred from mutant phenotype // non-traceable author statement // inferred from electronic annotation // non-traceable author statement // inferred from electronic an…	GO:0000775 // GO:0000776 // GO:0000785 // GO:0000922 // GO:0000940 // GO:0000940 // GO:0005634 // GO:0005635 // GO:0005730 // GO:0005737 // GO:0005819 // GO:0005829 // GO:0016363 // GO:0030496 // GO:0045120 // GO:0048471 // GO:0000775 // GO:0000776 // GO:0000777 // GO:0005634 // GO:0005694 // GO:0005737 // GO:0005819 // GO:0005856 // GO:0016363	chromosome, centromeric region // kinetochore // chromatin // spindle pole // condensed chromosome outer kinetochore // condensed chromosome outer kinetochore // nucleus // nuclear envelope // nucleolus // cytoplasm // spindle // cytosol // nuclear matrix // midbody // pronucleus // perinuclear region of cytoplasm // chromosome, centromeric region // kinetochore // condensed chromosome kinetochor…	inferred from direct assay // inferred from direct assay // non-traceable author statement // inferred from direct assay // inferred from direct assay // traceable author statement // inferred from direct assay // inferred from direct assay // inferred from direct assay // inferred from direct assay // inferred from direct assay // traceable author statement // inferred from direct assay // infer…	GO:0003682 // GO:0005515 // GO:0008022 // GO:0008134 // GO:0042803 // GO:0045502 // GO:0008134 // GO:0042803 // GO:0045502	chromatin binding // protein binding // protein C-terminus binding // transcription factor binding // protein homodimerization activity // dynein binding // transcription factor binding // protein homodimerization activity // dynein binding	non-traceable author statement // inferred from physical interaction // inferred from physical interaction // inferred from physical interaction // inferred from physical interaction // inferred from direct assay // inferred from electronic annotation // inferred from electronic annotation // inferred from electronic annotation	---	---	---	---	---	16677425	20	1	main
16977396	8.38556	9.16705	7.51511	7.7011		8.77631	7.6081		NM_001037582	SCD5	stearoyl-CoA desaturase 5	4q21.22	NM_001037582	RefSeq	Homo sapiens stearoyl-CoA desaturase 5 (SCD5), transcript variant 1, mRNA.	65	65	17	26	TRUE	Hs.379191	adrenal gland| blood| bone| bone marrow| brain| ear| embryonic tissue| eye| intestine| kidney| liver| lung| lymph node| mammary gland| muscle| nerve| ovary| pancreas| parathyroid| pharynx| pituitary gland| placenta| prostate| skin| stomach| testis| thyroid| uterus| vascular|adrenal tumor| breast (mammary gland) tumor| chondrosarcoma| colorectal tumor| gastrointestinal tumor| germ cell tumor| glio…	chr4	-	83550690	83720010	NM_001037582	Q86SK9	GO:0006633 // GO:0055114 // GO:0006629 // GO:0006631	fatty acid biosynthetic process // oxidation-reduction process // lipid metabolic process // fatty acid metabolic process	inferred from electronic annotation // inferred from electronic annotation // inferred from electronic annotation // inferred from electronic annotation	GO:0005789 // GO:0016021 // GO:0005783 // GO:0016020	endoplasmic reticulum membrane // integral component of membrane // endoplasmic reticulum // membrane	inferred from electronic annotation // inferred from electronic annotation // inferred from electronic annotation // inferred from electronic annotation	GO:0004768 // GO:0005506 // GO:0016491 // GO:0016717 // GO:0046872	stearoyl-CoA 9-desaturase activity // iron ion binding // oxidoreductase activity // oxidoreductase activity, acting on paired donors, with oxidation of a pair of donors resulting in the reduction of molecular oxygen to two molecules of water // metal ion binding	inferred from electronic annotation // inferred from electronic annotation // inferred from electronic annotation // inferred from electronic annotation // inferred from electronic annotation	---	---	---	---	---	16977396	26	1	main
16913957	7.53557	8.86598	9.13845	7.93937		8.20078	8.53891		NM_001278610	MYBL2	v-myb avian myeloblastosis viral oncogene homolog-like 2	20q13.1	NM_001278610	RefSeq	Homo sapiens v-myb avian myeloblastosis viral oncogene homolog-like 2 (MYBL2), transcript variant 2, mRNA.	92	92	23	25	TRUE	Hs.179718	adrenal gland| ascites| bladder| blood| bone| bone marrow| brain| cervix| connective tissue| embryonic tissue| esophagus| eye| heart| intestine| kidney| larynx| liver| lung| lymph| lymph node| mammary gland| mouth| muscle| ovary| pancreas| placenta| prostate| salivary gland| skin| spleen| stomach| testis| thymus| thyroid| tonsil| umbilical cord| uterus| vascular|adrenal tumor| breast (mammary gla…	chr20	+	42295709	42345136	NM_001278610	P10244	GO:0000086 // GO:0000278 // GO:0006351 // GO:0045944 // GO:0051726 // GO:0090307 // GO:0006355 // GO:0007049	G2/M transition of mitotic cell cycle // mitotic cell cycle // transcription, DNA-templated // positive regulation of transcription from RNA polymerase II promoter // regulation of cell cycle // spindle assembly involved in mitosis // regulation of transcription, DNA-templated // cell cycle	traceable author statement // traceable author statement // inferred from electronic annotation // inferred from direct assay // traceable author statement // inferred from electronic annotation // inferred from electronic annotation // inferred from electronic annotation	GO:0005634 // GO:0005654 // GO:0005730 // GO:0031523 // GO:0005634	nucleus // nucleoplasm // nucleolus // Myb complex // nucleus	inferred from direct assay // traceable author statement // inferred from direct assay // inferred from electronic annotation // inferred from electronic annotation	GO:0000978 // GO:0001077 // GO:0003682 // GO:0003700 // GO:0005515 // GO:0003677 // GO:0003700	RNA polymerase II core promoter proximal region sequence-specific DNA binding // RNA polymerase II core promoter proximal region sequence-specific DNA binding transcription factor activity involved in positive regulation of transcription // chromatin binding // sequence-specific DNA binding transcription factor activity // protein binding // DNA binding // sequence-specific DNA binding transcript…	inferred from direct assay // inferred from direct assay // inferred from electronic annotation // traceable author statement // inferred from physical interaction // inferred from electronic annotation // inferred from electronic annotation	---	---	---	---	---	16913957	25	1	main
17016363	3.25492	4.84147	5.37127	3.48363		4.0482	4.42745		NM_003537	HIST1H3B	histone cluster 1, H3b	6p22.1	NM_003537	RefSeq	Homo sapiens histone cluster 1, H3b (HIST1H3B), mRNA.	100	100	8	8	TRUE	Hs.533292	kidney| liver| testis| thymus| normal| primitive neuroectodermal tumor of the CNS| fetus	chr6	-	26031817	26032288	NM_003537	P68431	GO:0006325 // GO:0006334 // GO:0006335 // GO:0007596 // GO:0060968	chromatin organization // nucleosome assembly // DNA replication-dependent nucleosome assembly // blood coagulation // regulation of gene silencing	traceable author statement // inferred from electronic annotation // inferred from direct assay // traceable author statement // inferred from direct assay	GO:0000228 // GO:0000786 // GO:0005576 // GO:0005634 // GO:0005634 // GO:0005654 // GO:0005694 // GO:0016020 // GO:0043234 // GO:0070062	nuclear chromosome // nucleosome // extracellular region // nucleus // nucleus // nucleoplasm // chromosome // membrane // protein complex // extracellular vesicular exosome	inferred from direct assay // inferred from electronic annotation // traceable author statement // inferred from direct assay // inferred from electronic annotation // traceable author statement // inferred from electronic annotation // inferred from direct assay // inferred from direct assay // inferred from direct assay	GO:0003677 // GO:0005515 // GO:0046982	DNA binding // protein binding // protein heterodimerization activity	inferred from electronic annotation // inferred from physical interaction // inferred from electronic annotation	---	---	---	---	---	17016363	8	3	main
16942958	8.343	6.99918	9.94635	9.69423		7.67109	9.82029		NM_005233	EPHA3	EPH receptor A3	3p11.2	NM_005233	RefSeq	Homo sapiens EPH receptor A3 (EPHA3), transcript variant 1, mRNA.	93	93	28	30	TRUE	Hs.123642	brain| connective tissue| eye| intestine| kidney| lung| mammary gland| mouth| muscle| pancreas| placenta| prostate| skin| spleen| testis| trachea| uterus| breast (mammary gland) tumor| chondrosarcoma| germ cell tumor| non-neoplasia| normal| pancreatic tumor| primitive neuroectodermal tumor of the CNS| prostate cancer| skin tumor| fetus| juvenile| adult	chr3	+	89156674	89531284	NM_005233	P29320	GO:0007155 // GO:0010717 // GO:0010976 // GO:0016477 // GO:0018108 // GO:0032319 // GO:0032956 // GO:0048013 // GO:0051893 // GO:0070507 // GO:0071300 // GO:0097155 // GO:0097156 // GO:0006468 // GO:0007169 // GO:0016310 // GO:0048013	cell adhesion // regulation of epithelial to mesenchymal transition // positive regulation of neuron projection development // cell migration // peptidyl-tyrosine phosphorylation // regulation of Rho GTPase activity // regulation of actin cytoskeleton organization // ephrin receptor signaling pathway // regulation of focal adhesion assembly // regulation of microtubule cytoskeleton organization /…	inferred from electronic annotation // inferred from sequence or structural similarity // inferred from mutant phenotype // inferred from sequence or structural similarity // inferred from electronic annotation // inferred from direct assay // inferred from direct assay // inferred from direct assay // inferred from direct assay // inferred from direct assay // inferred from mutant phenotype // i…	GO:0005576 // GO:0005769 // GO:0005887 // GO:0005886 // GO:0005887 // GO:0016020 // GO:0016021	extracellular region // early endosome // integral component of plasma membrane // plasma membrane // integral component of plasma membrane // membrane // integral component of membrane	inferred from electronic annotation // inferred from direct assay // inferred from direct assay // inferred from electronic annotation // inferred from electronic annotation // inferred from electronic annotation // inferred from electronic annotation	GO:0005004 // GO:0005515 // GO:0005524 // GO:0000166 // GO:0004672 // GO:0004713 // GO:0004714 // GO:0005003 // GO:0016301 // GO:0016740 // GO:0016772	GPI-linked ephrin receptor activity // protein binding // ATP binding // nucleotide binding // protein kinase activity // protein tyrosine kinase activity // transmembrane receptor protein tyrosine kinase activity // ephrin receptor activity // kinase activity // transferase activity // transferase activity, transferring phosphorus-containing groups	inferred from direct assay // inferred from physical interaction // inferred from electronic annotation // inferred from electronic annotation // inferred from electronic annotation // inferred from electronic annotation // inferred from electronic annotation // inferred from electronic annotation // inferred from electronic annotation // inferred from electronic annotation // inferred from elect…	---	---	---	---	---	16942958	30	1	main
16847432	6.52304	7.86296	8.6051	7.67988		7.193	8.14249		NM_032043	BRIP1	BRCA1 interacting protein C-terminal helicase 1	17q22.2	NM_032043	RefSeq	Homo sapiens BRCA1 interacting protein C-terminal helicase 1 (BRIP1), mRNA.	100	100	37	37	TRUE	Hs.128903	blood| bone| bone marrow| brain| embryonic tissue| esophagus| eye| intestine| liver| lymph node| mammary gland| muscle| prostate| skin| testis| thyroid| uterus| breast (mammary gland) tumor| chondrosarcoma| colorectal tumor| esophageal tumor| germ cell tumor| head and neck tumor| leukemia| liver tumor| normal| prostate cancer| retinoblastoma| skin tumor| soft tissue/muscle tissue tumor| uterine t…	chr17	-	59756547	59940920	NM_032043	Q9BX63	GO:0000077 // GO:0006200 // GO:0006302 // GO:0006357 // GO:0032508 // GO:0032508 // GO:0044281 // GO:0006139 // GO:0006281 // GO:0006974 // GO:0008152	DNA damage checkpoint // ATP catabolic process // double-strand break repair // regulation of transcription from RNA polymerase II promoter // DNA duplex unwinding // DNA duplex unwinding // small molecule metabolic process // nucleobase-containing compound metabolic process // DNA repair // cellular response to DNA damage stimulus // metabolic process	non-traceable author statement // inferred from electronic annotation // non-traceable author statement // inferred from direct assay // inferred from electronic annotation // non-traceable author statement // traceable author statement // inferred from electronic annotation // inferred from electronic annotation // inferred from electronic annotation // inferred from electronic annotation	GO:0005634 // GO:0005634 // GO:0005737 // GO:0031965 // GO:0005634	nucleus // nucleus // cytoplasm // nuclear membrane // nucleus	inferred from direct assay // non-traceable author statement // inferred from direct assay // inferred from direct assay // inferred from electronic annotation	GO:0003677 // GO:0004003 // GO:0005515 // GO:0005524 // GO:0046872 // GO:0051539 // GO:0000166 // GO:0003676 // GO:0003677 // GO:0004003 // GO:0004386 // GO:0008026 // GO:0016787 // GO:0016817 // GO:0016818 // GO:0051536	DNA binding // ATP-dependent DNA helicase activity // protein binding // ATP binding // metal ion binding // 4 iron, 4 sulfur cluster binding // nucleotide binding // nucleic acid binding // DNA binding // ATP-dependent DNA helicase activity // helicase activity // ATP-dependent helicase activity // hydrolase activity // hydrolase activity, acting on acid anhydrides // hydrolase activity, acting …	non-traceable author statement // non-traceable author statement // inferred from physical interaction // inferred from electronic annotation // inferred from electronic annotation // inferred from electronic annotation // inferred from electronic annotation // inferred from electronic annotation // inferred from electronic annotation // inferred from electronic annotation // inferred from electr…	---	---	---	---	---	16847432	37	1	main
16705159	6.95594	7.65523	8.54849	7.21866		7.30558	7.88358		NM_001170406	CDK1	cyclin-dependent kinase 1	10q21.1	NM_001170406	RefSeq	Homo sapiens cyclin-dependent kinase 1 (CDK1), transcript variant 4, mRNA.	100	35	8	8	FALSE	Hs.732435	adrenal gland| ascites| bladder| blood| bone| bone marrow| brain| cervix| connective tissue| embryonic tissue| esophagus| eye| heart| intestine| kidney| liver| lung| lymph| lymph node| mammary gland| mouth| muscle| ovary| pancreas| pharynx| pituitary gland| placenta| prostate| salivary gland| skin| stomach| testis| thymus| tonsil| umbilical cord| uterus| vascular|adrenal tumor| breast (mammary gl…	chr10	+	62538089	62554610	NM_001170406	P06493	GO:0000082 // GO:0000083 // GO:0000086 // GO:0000165 // GO:0000186 // GO:0000187 // GO:0000226 // GO:0000278 // GO:0002224 // GO:0002755 // GO:0002756 // GO:0006260 // GO:0006281 // GO:0006461 // GO:0006915 // GO:0007067 // GO:0007077 // GO:0007095 // GO:0007098 // GO:0007173 // GO:0007264 // GO:0007265 // GO:0007344 // GO:0007411 // GO:0007569 // GO:0008286 // GO:0008543 // GO:0009636 // GO:0010…	G1/S transition of mitotic cell cycle // regulation of transcription involved in G1/S transition of mitotic cell cycle // G2/M transition of mitotic cell cycle // MAPK cascade // activation of MAPKK activity // activation of MAPK activity // microtubule cytoskeleton organization // mitotic cell cycle // toll-like receptor signaling pathway // MyD88-dependent toll-like receptor signaling pathway /…	traceable author statement // traceable author statement // traceable author statement // traceable author statement // traceable author statement // traceable author statement // traceable author statement // traceable author statement // traceable author statement // traceable author statement // traceable author statement // traceable author statement // traceable author statement // inferred …	GO:0005634 // GO:0005654 // GO:0005737 // GO:0005739 // GO:0005813 // GO:0005829 // GO:0005876 // GO:0030496 // GO:0070062 // GO:0072686 // GO:0005634 // GO:0005737 // GO:0005739 // GO:0005815 // GO:0005856 // GO:0016020	nucleus // nucleoplasm // cytoplasm // mitochondrion // centrosome // cytosol // spindle microtubule // midbody // extracellular vesicular exosome // mitotic spindle // nucleus // cytoplasm // mitochondrion // microtubule organizing center // cytoskeleton // membrane	inferred from direct assay // traceable author statement // inferred from direct assay // traceable author statement // inferred from direct assay // traceable author statement // inferred from direct assay // inferred from direct assay // inferred from direct assay // inferred from direct assay // inferred from electronic annotation // inferred from electronic annotation // inferred from electro…	GO:0004672 // GO:0004674 // GO:0004693 // GO:0004693 // GO:0005515 // GO:0005524 // GO:0008353 // GO:0030332 // GO:0030544 // GO:0035173 // GO:0000166 // GO:0004672 // GO:0004674 // GO:0004693 // GO:0008353 // GO:0016301 // GO:0016740 // GO:0016772	protein kinase activity // protein serine/threonine kinase activity // cyclin-dependent protein serine/threonine kinase activity // cyclin-dependent protein serine/threonine kinase activity // protein binding // ATP binding // RNA polymerase II carboxy-terminal domain kinase activity // cyclin binding // Hsp70 protein binding // histone kinase activity // nucleotide binding // protein kinase acti…	non-traceable author statement // inferred from direct assay // inferred from direct assay // traceable author statement // inferred from physical interaction // inferred from electronic annotation // inferred from direct assay // inferred from electronic annotation // inferred from electronic annotation // inferred from electronic annotation // inferred from electronic annotation // inferred fro…	GenMAPP	Cell_cycle_KEGG	---	---	---	16705159	23	1	main
16842673	7.74397	8.66052	8.49986	7.3305		8.20224	7.91518		NM_006461	SPAG5	sperm associated antigen 5	17q11.2	NM_006461	RefSeq	Homo sapiens sperm associated antigen 5 (SPAG5), mRNA.	100	100	24	24	TRUE	Hs.514033	adrenal gland| ascites| blood| bone| bone marrow| brain| cervix| connective tissue| embryonic tissue| eye| intestine| kidney| liver| lung| lymph| lymph node| mammary gland| mouth| muscle| ovary| pancreas| placenta| prostate| salivary gland| skin| stomach| testis| thymus| thyroid| umbilical cord| uterus| vascular|adrenal tumor| bladder carcinoma| breast (mammary gland) tumor| cervical tumor| chond…	chr17	-	26904583	26926297	NM_006461	Q96R06	GO:0000070 // GO:0007049 // GO:0007051 // GO:0007051 // GO:0007059 // GO:0048015 // GO:0051988 // GO:0007049 // GO:0007067 // GO:0051301 // GO:0051988 // GO:0008152	mitotic sister chromatid segregation // cell cycle // spindle organization // spindle organization // chromosome segregation // phosphatidylinositol-mediated signaling // regulation of attachment of spindle microtubules to kinetochore // cell cycle // mitotic nuclear division // cell division // regulation of attachment of spindle microtubules to kinetochore // metabolic process	inferred from mutant phenotype // non-traceable author statement // inferred from mutant phenotype // non-traceable author statement // inferred from mutant phenotype // non-traceable author statement // inferred from mutant phenotype // inferred from electronic annotation // inferred from electronic annotation // inferred from electronic annotation // inferred from electronic annotation // infer…	GO:0000776 // GO:0000777 // GO:0000922 // GO:0005737 // GO:0005815 // GO:0005876 // GO:0030496 // GO:0035371 // GO:0072686 // GO:0000775 // GO:0000776 // GO:0005694 // GO:0005819 // GO:0005856 // GO:0005874	kinetochore // condensed chromosome kinetochore // spindle pole // cytoplasm // microtubule organizing center // spindle microtubule // midbody // microtubule plus-end // mitotic spindle // chromosome, centromeric region // kinetochore // chromosome // spindle // cytoskeleton // microtubule	inferred from direct assay // inferred from electronic annotation // inferred from electronic annotation // inferred from electronic annotation // inferred from electronic annotation // inferred from electronic annotation // inferred from electronic annotation // inferred from direct assay // inferred from direct assay // inferred from electronic annotation // inferred from electronic annotation …	GO:0005515 // GO:0016772	protein binding // transferase activity, transferring phosphorus-containing groups	inferred from physical interaction // inferred from electronic annotation	---	---	---	---	---	16842673	24	1	main
16784299	8.28443	8.58215	9.02458	7.90301		8.43329	8.4638		NM_001130851	CDKN3	cyclin-dependent kinase inhibitor 3	14q22	NM_001130851	RefSeq	Homo sapiens cyclin-dependent kinase inhibitor 3 (CDKN3), transcript variant 2, mRNA.	100	45	9	9	FALSE	Hs.84113	adrenal gland| ascites| bladder| blood| bone| bone marrow| brain| connective tissue| embryonic tissue| eye| heart| intestine| kidney| larynx| liver| lung| lymph| lymph node| mammary gland| mouth| ovary| pancreas| pharynx| placenta| prostate| skin| stomach| testis| umbilical cord| uterus|adrenal tumor| bladder carcinoma| breast (mammary gland) tumor| chondrosarcoma| colorectal tumor| gastrointesti…	chr14	+	54863567	54886936	NM_001130851	Q16667	GO:0000079 // GO:0000082 // GO:0007050 // GO:0008285 // GO:0035335 // GO:0035335 // GO:0007049 // GO:0007050 // GO:0016311 // GO:0016310	regulation of cyclin-dependent protein serine/threonine kinase activity // G1/S transition of mitotic cell cycle // cell cycle arrest // negative regulation of cell proliferation // peptidyl-tyrosine dephosphorylation // peptidyl-tyrosine dephosphorylation // cell cycle // cell cycle arrest // dephosphorylation // phosphorylation	traceable author statement // traceable author statement // inferred from direct assay // traceable author statement // inferred from direct assay // inferred from electronic annotation // inferred from electronic annotation // traceable author statement // inferred from electronic annotation // inferred from electronic annotation	GO:0005737 // GO:0048471 // GO:0005737 // GO:0048471	cytoplasm // perinuclear region of cytoplasm // cytoplasm // perinuclear region of cytoplasm	inferred from direct assay // inferred from direct assay // inferred from electronic annotation // inferred from electronic annotation	GO:0004722 // GO:0004725 // GO:0005515 // GO:0008138 // GO:0004721 // GO:0004725 // GO:0016787 // GO:0016791 // GO:0016301	protein serine/threonine phosphatase activity // protein tyrosine phosphatase activity // protein binding // protein tyrosine/serine/threonine phosphatase activity // phosphoprotein phosphatase activity // protein tyrosine phosphatase activity // hydrolase activity // phosphatase activity // kinase activity	inferred from direct assay // inferred from direct assay // inferred from physical interaction // traceable author statement // inferred from electronic annotation // inferred from electronic annotation // inferred from electronic annotation // inferred from electronic annotation // inferred from electronic annotation	---	---	---	---	---	16784299	20	1	main
16736891	7.51577	8.64521	8.47393	7.31651		8.08049	7.89522		NM_031217	KIF18A	kinesin family member 18A	11p14.1	NM_031217	RefSeq	Homo sapiens kinesin family member 18A (KIF18A), mRNA.	100	89	32	32	FALSE	Hs.301052	ascites| bladder| blood| bone| bone marrow| brain| cervix| connective tissue| embryonic tissue| esophagus| eye| intestine| kidney| liver| lung| lymph| lymph node| mammary gland| muscle| placenta| prostate| skin| stomach| testis| thymus| thyroid| trachea| uterus| vascular| bladder carcinoma| breast (mammary gland) tumor| cervical tumor| colorectal tumor| esophageal tumor| gastrointestinal tumor| g…	chr11	-	28042163	28129746	NM_031217	Q8NI77	GO:0000278 // GO:0006200 // GO:0007018 // GO:0007019 // GO:0007080 // GO:0007596 // GO:0008152 // GO:0015031 // GO:0019886 // GO:0006810 // GO:0007018 // GO:0008152	mitotic cell cycle // ATP catabolic process // microtubule-based movement // microtubule depolymerization // mitotic metaphase plate congression // blood coagulation // metabolic process // protein transport // antigen processing and presentation of exogenous peptide antigen via MHC class II // transport // microtubule-based movement // metabolic process	traceable author statement // inferred from direct assay // traceable author statement // inferred from direct assay // inferred from direct assay // traceable author statement // inferred from direct assay // inferred from electronic annotation // traceable author statement // inferred from electronic annotation // inferred from electronic annotation // inferred from electronic annotation	GO:0001726 // GO:0005634 // GO:0005737 // GO:0005815 // GO:0005828 // GO:0005829 // GO:0005871 // GO:0005901 // GO:0015630 // GO:0001726 // GO:0005634 // GO:0005737 // GO:0005856 // GO:0005874 // GO:0042995	ruffle // nucleus // cytoplasm // microtubule organizing center // kinetochore microtubule // cytosol // kinesin complex // caveola // microtubule cytoskeleton // ruffle // nucleus // cytoplasm // cytoskeleton // microtubule // cell projection	inferred from direct assay // inferred from direct assay // inferred from direct assay // inferred from electronic annotation // inferred from direct assay // traceable author statement // inferred from electronic annotation // inferred from direct assay // inferred from direct assay // inferred from electronic annotation // inferred from electronic annotation // inferred from electronic annotati…	GO:0003779 // GO:0005515 // GO:0005524 // GO:0008017 // GO:0008574 // GO:0043130 // GO:0051010 // GO:0070463 // GO:0000166 // GO:0003777 // GO:0008017	actin binding // protein binding // ATP binding // microtubule binding // plus-end-directed microtubule motor activity // ubiquitin binding // microtubule plus-end binding // tubulin-dependent ATPase activity // nucleotide binding // microtubule motor activity // microtubule binding	inferred from physical interaction // inferred from physical interaction // inferred from electronic annotation // inferred from direct assay // inferred from direct assay // inferred from direct assay // inferred from direct assay // inferred from direct assay // inferred from electronic annotation // inferred from electronic annotation // inferred from electronic annotation	---	---	---	---	---	16736891	36	1	main
17016400	7.7936	9.09174	9.73109	8.57995		8.44267	9.15552		NM_021018	HIST1H3F	histone cluster 1, H3f	6p22.2	NM_021018	RefSeq	Homo sapiens histone cluster 1, H3f (HIST1H3F), mRNA.	100	100	10	10	TRUE	Hs.247814	brain| connective tissue| liver| skin| non-neoplasia| normal| fetus	chr6	-	26250370	26250835	NM_021018	P68431	GO:0006325 // GO:0006335 // GO:0007596 // GO:0060968 // GO:0006334	chromatin organization // DNA replication-dependent nucleosome assembly // blood coagulation // regulation of gene silencing // nucleosome assembly	traceable author statement // inferred from direct assay // traceable author statement // inferred from direct assay // inferred from electronic annotation	GO:0000228 // GO:0000786 // GO:0005576 // GO:0005634 // GO:0005654 // GO:0043234 // GO:0070062 // GO:0005634 // GO:0005694 // GO:0016020	nuclear chromosome // nucleosome // extracellular region // nucleus // nucleoplasm // protein complex // extracellular vesicular exosome // nucleus // chromosome // membrane	inferred from direct assay // inferred from electronic annotation // traceable author statement // inferred from direct assay // traceable author statement // inferred from direct assay // inferred from direct assay // inferred from electronic annotation // inferred from electronic annotation // inferred from direct assay	GO:0003677 // GO:0005515 // GO:0046982	DNA binding // protein binding // protein heterodimerization activity	inferred from electronic annotation // inferred from physical interaction // inferred from electronic annotation	---	---	---	---	---	17016400	10	1	main
16985599	7.48311	8.42887	8.94507	7.54366		7.95599	8.24437		NM_031966	CCNB1	cyclin B1	5q12	NM_031966	RefSeq	Homo sapiens cyclin B1 (CCNB1), mRNA.	85	85	17	20	TRUE	Hs.23960	adipose tissue| adrenal gland| ascites| bladder| blood| bone| bone marrow| brain| cervix| connective tissue| ear| embryonic tissue| esophagus| eye| heart| intestine| kidney| larynx| liver| lung| lymph| lymph node| mammary gland| mouth| muscle| ovary| pancreas| pharynx| pituitary gland| placenta| prostate| salivary gland| skin| spleen| stomach| testis| thymus| thyroid| tonsil| trachea| umbilical c…	chr5	+	68462837	68474072	NM_031966	P14635	GO:0000079 // GO:0000082 // GO:0000086 // GO:0000278 // GO:0001556 // GO:0001701 // GO:0001933 // GO:0006461 // GO:0006468 // GO:0007077 // GO:0007080 // GO:0007283 // GO:0009612 // GO:0010629 // GO:0031145 // GO:0031442 // GO:0033129 // GO:0042246 // GO:0042493 // GO:0043148 // GO:0045931 // GO:0046680 // GO:0048565 // GO:0051437 // GO:0051439 // GO:0051726 // GO:0051987 // GO:0055015 // GO:0060…	regulation of cyclin-dependent protein serine/threonine kinase activity // G1/S transition of mitotic cell cycle // G2/M transition of mitotic cell cycle // mitotic cell cycle // oocyte maturation // in utero embryonic development // negative regulation of protein phosphorylation // protein complex assembly // protein phosphorylation // mitotic nuclear envelope disassembly // mitotic metaphase pl…	inferred from electronic annotation // traceable author statement // traceable author statement // traceable author statement // inferred from electronic annotation // inferred from electronic annotation // inferred from electronic annotation // inferred from electronic annotation // inferred from electronic annotation // traceable author statement // inferred from mutant phenotype // inferred fr…	GO:0000922 // GO:0000942 // GO:0005634 // GO:0005654 // GO:0005737 // GO:0005813 // GO:0005829 // GO:0016020 // GO:0005634 // GO:0005737 // GO:0005815 // GO:0005856	spindle pole // condensed nuclear chromosome outer kinetochore // nucleus // nucleoplasm // cytoplasm // centrosome // cytosol // membrane // nucleus // cytoplasm // microtubule organizing center // cytoskeleton	inferred from direct assay // inferred from direct assay // inferred from direct assay // traceable author statement // inferred from direct assay // inferred from direct assay // traceable author statement // inferred from electronic annotation // inferred from electronic annotation // inferred from electronic annotation // inferred from electronic annotation // inferred from electronic annotati…	GO:0005113 // GO:0005515 // GO:0016301 // GO:0019901 // GO:0019901	patched binding // protein binding // kinase activity // protein kinase binding // protein kinase binding	inferred from physical interaction // inferred from physical interaction // inferred from electronic annotation // inferred from physical interaction // inferred from electronic annotation	GenMAPP // GenMAPP	Cell_cycle_KEGG // G1_to_S_cell_cycle_Reactome	---	---	---	16985599	20	1	main
16834436	9.11418	9.75271	5.25945	4.93499		9.43344	5.09722		NM_005854	RAMP2	receptor (G protein-coupled) activity modifying protein 2	17q12-q21.1	NM_005854	RefSeq	Homo sapiens receptor (G protein-coupled) activity modifying protein 2 (RAMP2), mRNA.	100	100	16	16	TRUE	Hs.514193	brain| eye| heart| kidney| lung| mammary gland| pancreas| placenta| prostate| spleen| thyroid| uterus| breast (mammary gland) tumor| glioma| head and neck tumor| lung tumor| normal| pancreatic tumor| primitive neuroectodermal tumor of the CNS| prostate cancer| uterine tumor| fetus| adult	chr17	+	40913212	40915059	NM_005854	O60895	GO:0001525 // GO:0001570 // GO:0001666 // GO:0002040 // GO:0006171 // GO:0006816 // GO:0006886 // GO:0007186 // GO:0007507 // GO:0007565 // GO:0008217 // GO:0008277 // GO:0010628 // GO:0015031 // GO:0030819 // GO:0031623 // GO:0032355 // GO:0032570 // GO:0032870 // GO:0034333 // GO:0035924 // GO:0043116 // GO:0045766 // GO:0070830 // GO:0070831 // GO:0072659 // GO:0097084 // GO:2000352 // GO:2001…	angiogenesis // vasculogenesis // response to hypoxia // sprouting angiogenesis // cAMP biosynthetic process // calcium ion transport // intracellular protein transport // G-protein coupled receptor signaling pathway // heart development // female pregnancy // regulation of blood pressure // regulation of G-protein coupled receptor protein signaling pathway // positive regulation of gene expressi…	inferred from direct assay // inferred from mutant phenotype // inferred from electronic annotation // inferred from sequence or structural similarity // inferred from direct assay // inferred from direct assay // inferred from electronic annotation // inferred from electronic annotation // inferred from sequence or structural similarity // inferred from electronic annotation // inferred from seq…	GO:0005737 // GO:0005764 // GO:0005886 // GO:0005886 // GO:0005887 // GO:0005905 // GO:0009986 // GO:0043235 // GO:0016020 // GO:0016021	cytoplasm // lysosome // plasma membrane // plasma membrane // integral component of plasma membrane // coated pit // cell surface // receptor complex // membrane // integral component of membrane	inferred from direct assay // traceable author statement // inferred from direct assay // traceable author statement // traceable author statement // traceable author statement // inferred from direct assay // inferred from direct assay // inferred from electronic annotation // inferred from electronic annotation	GO:0005515 // GO:0008565 // GO:0015026 // GO:0008565 // GO:0015026	protein binding // protein transporter activity // coreceptor activity // protein transporter activity // coreceptor activity	inferred from physical interaction // inferred from direct assay // inferred from sequence or structural similarity // inferred from electronic annotation // inferred from electronic annotation	GenMAPP	Smooth_muscle_contraction	---	---	---	16834436	16	1	main
17067102	6.78648	7.6406	8.05791	6.94336		7.21354	7.50064		NM_152562	CDCA2	cell division cycle associated 2	8p21.2	NM_152562	RefSeq	Homo sapiens cell division cycle associated 2 (CDCA2), mRNA.	94	94	30	32	TRUE	Hs.33366	ascites| blood| bone| bone marrow| brain| cervix| connective tissue| embryonic tissue| eye| intestine| kidney| liver| lung| lymph node| mammary gland| muscle| placenta| prostate| skin| stomach| testis| uterus| vascular| chondrosarcoma| colorectal tumor| gastrointestinal tumor| germ cell tumor| kidney tumor| leukemia| liver tumor| lung tumor| lymphoma| non-neoplasia| normal| primitive neuroectoder…	chr8	+	25316511	25365436	NM_152562	Q69YH5	GO:0007067 // GO:0007049 // GO:0035307 // GO:0051301	mitotic nuclear division // cell cycle // positive regulation of protein dephosphorylation // cell division	inferred from electronic annotation // inferred from electronic annotation // inferred from mutant phenotype // inferred from electronic annotation	GO:0005634 // GO:0005730 // GO:0005737 // GO:0005634 // GO:0005694	nucleus // nucleolus // cytoplasm // nucleus // chromosome	inferred from direct assay // inferred from direct assay // inferred from direct assay // inferred from electronic annotation // inferred from direct assay	---	---	---	---	---	---	---	---	17067102	32	1	main
16909700	8.51723	9.55698	9.39433	8.39105		9.03711	8.89269		NM_018410	HJURP	Holliday junction recognition protein	2q37.1	NM_018410	RefSeq	Homo sapiens Holliday junction recognition protein (HJURP), transcript variant 1, mRNA.	81	81	17	21	TRUE	Hs.532968	adrenal gland| ascites| blood| bone| bone marrow| brain| cervix| connective tissue| embryonic tissue| esophagus| eye| heart| intestine| kidney| liver| lung| lymph| lymph node| mammary gland| mouth| muscle| ovary| pancreas| placenta| skin| stomach| testis| thymus| tonsil| uterus| vascular|adrenal tumor| breast (mammary gland) tumor| chondrosarcoma| colorectal tumor| esophageal tumor| gastrointesti…	chr2	-	234742062	234763212	NM_018410	Q8NCD3	GO:0006334 // GO:0007049 // GO:0007059 // GO:0034080 // GO:0034080 // GO:0043254 // GO:0051101	nucleosome assembly // cell cycle // chromosome segregation // centromere-specific nucleosome assembly // centromere-specific nucleosome assembly // regulation of protein complex assembly // regulation of DNA binding	traceable author statement // inferred from electronic annotation // inferred from mutant phenotype // inferred from mutant phenotype // traceable author statement // inferred from direct assay // inferred from direct assay	GO:0000775 // GO:0000777 // GO:0005634 // GO:0005654 // GO:0005730 // GO:0005737 // GO:0000775 // GO:0005634 // GO:0005694 // GO:0005730	chromosome, centromeric region // condensed chromosome kinetochore // nucleus // nucleoplasm // nucleolus // cytoplasm // chromosome, centromeric region // nucleus // chromosome // nucleolus	inferred from direct assay // inferred from direct assay // inferred from direct assay // traceable author statement // inferred from direct assay // inferred from direct assay // inferred from electronic annotation // inferred from electronic annotation // inferred from electronic annotation // inferred from electronic annotation	GO:0003677 // GO:0005515 // GO:0042393 // GO:0042393 // GO:0042802	DNA binding // protein binding // histone binding // histone binding // identical protein binding	inferred from electronic annotation // inferred from physical interaction // inferred from direct assay // inferred from physical interaction // inferred from physical interaction	---	---	---	---	---	16909700	21	1	main
16931384	8.0352	9.16259	8.41326	7.44009		8.5989	7.92667		NM_016426	GTSE1	G-2 and S-phase expressed 1	22q13.2-q13.3	NM_016426	RefSeq	Homo sapiens G-2 and S-phase expressed 1 (GTSE1), mRNA.	84	84	16	19	TRUE	Hs.386189 // Hs.439524	adipose tissue| adrenal gland| ascites| blood| bone marrow| brain| cervix| embryonic tissue| esophagus| intestine| kidney| liver| lung| lymph| lymph node| mammary gland| mouth| muscle| ovary| pancreas| placenta| prostate| skin| testis| thymus| thyroid| uterus| vascular|adrenal tumor| breast (mammary gland) tumor| cervical tumor| chondrosarcoma| colorectal tumor| esophageal tumor| gastrointestinal…	chr22	+	46692638	46726707	NM_016426	Q9NYZ3	GO:0000085 // GO:0006977 // GO:0007017 // GO:0008033 // GO:0032259	mitotic G2 phase // DNA damage response, signal transduction by p53 class mediator resulting in cell cycle arrest // microtubule-based process // tRNA processing // methylation	non-traceable author statement // non-traceable author statement // non-traceable author statement // inferred from electronic annotation // inferred from electronic annotation	GO:0005881 // GO:0005737 // GO:0005856 // GO:0005874 // GO:0016020 // GO:0005739 // GO:0005739	cytoplasmic microtubule // cytoplasm // cytoskeleton // microtubule // membrane // mitochondrion // mitochondrion	non-traceable author statement // inferred from electronic annotation // inferred from electronic annotation // inferred from electronic annotation // inferred from direct assay // inferred from electronic annotation // inferred from sequence or structural similarity	GO:0005515 // GO:0003674 // GO:0000049 // GO:0000166 // GO:0003723 // GO:0005524 // GO:0016740 // GO:0016783 // GO:0008168	protein binding // molecular_function // tRNA binding // nucleotide binding // RNA binding // ATP binding // transferase activity // sulfurtransferase activity // methyltransferase activity	inferred from physical interaction // no biological data available // inferred from electronic annotation // inferred from electronic annotation // inferred from electronic annotation // inferred from electronic annotation // inferred from electronic annotation // inferred from electronic annotation // inferred from electronic annotation	---	---	---	---	---	16931384	19	1	main
16663958	8.41459	9.08254	8.78323	7.87081		8.74857	8.32702		ENST00000372217	KIF2C	kinesin family member 2C	1p34.1	ENST00000372217	ENSEMBL	ensembl_havana_transcript:known chromosome:GRCh38:1:44746406:44767767:1 gene:ENSG00000142945 gene_biotype:protein_coding transcript_biotype:protein_coding	100	65	15	15	FALSE	Hs.720061 // Hs.733568	ascites| bladder| blood| bone| bone marrow| brain| cervix| connective tissue| embryonic tissue| esophagus| eye| heart| intestine| kidney| larynx| liver| lung| lymph| lymph node| mammary gland| mouth| muscle| ovary| pituitary gland| placenta| prostate| skin| stomach| testis| thymus| uterus| vascular| breast (mammary gland) tumor| cervical tumor| chondrosarcoma| colorectal tumor| esophageal tumor| …	chr1	+	45205490	45233439	ENST00000372217	Q99661	GO:0000278 // GO:0007018 // GO:0007019 // GO:0007019 // GO:0007059 // GO:0007067 // GO:0007596 // GO:0008152 // GO:0008152 // GO:0008283 // GO:0019886 // GO:0030951 // GO:0051983 // GO:0007018 // GO:0007049 // GO:0007067 // GO:0051301	mitotic cell cycle // microtubule-based movement // microtubule depolymerization // microtubule depolymerization // chromosome segregation // mitotic nuclear division // blood coagulation // metabolic process // metabolic process // cell proliferation // antigen processing and presentation of exogenous peptide antigen via MHC class II // establishment or maintenance of microtubule cytoskeleton po…	traceable author statement // traceable author statement // inferred from direct assay // inferred from mutant phenotype // inferred from electronic annotation // inferred from electronic annotation // traceable author statement // inferred from electronic annotation // traceable author statement // traceable author statement // traceable author statement // inferred from mutant phenotype // infe…	GO:0000775 // GO:0000776 // GO:0000777 // GO:0005634 // GO:0005829 // GO:0005871 // GO:0005881 // GO:0015630 // GO:0035371 // GO:0000775 // GO:0005874 // GO:0000776 // GO:0005694 // GO:0005737 // GO:0005856 // GO:0005871 // GO:0016020	chromosome, centromeric region // kinetochore // condensed chromosome kinetochore // nucleus // cytosol // kinesin complex // cytoplasmic microtubule // microtubule cytoskeleton // microtubule plus-end // chromosome, centromeric region // microtubule // kinetochore // chromosome // cytoplasm // cytoskeleton // kinesin complex // membrane	inferred from direct assay // inferred from direct assay // inferred from electronic annotation // inferred from electronic annotation // traceable author statement // inferred from electronic annotation // inferred from sequence or structural similarity // inferred from direct assay // inferred from direct assay // inferred from electronic annotation // inferred from electronic annotation // inf…	GO:0003777 // GO:0005515 // GO:0005524 // GO:0019237 // GO:0051010 // GO:0008017 // GO:0000166 // GO:0003777	microtubule motor activity // protein binding // ATP binding // centromeric DNA binding // microtubule plus-end binding // microtubule binding // nucleotide binding // microtubule motor activity	inferred from electronic annotation // inferred from physical interaction // inferred from electronic annotation // traceable author statement // inferred from direct assay // inferred from electronic annotation // inferred from electronic annotation // traceable author statement	---	---	Pfam	IPR001752	Kinesin, motor domain	16663958	23	1	main
17000439	6.79545	7.64641	7.76788	6.71633		7.22093	7.24211		NM_001287582	CDC25C	cell division cycle 25C	5q31	NM_001287582	RefSeq	Homo sapiens cell division cycle 25C (CDC25C), transcript variant 3, mRNA.	80	80	28	35	TRUE	Hs.656	blood| bone| brain| cervix| connective tissue| embryonic tissue| eye| heart| intestine| larynx| liver| lung| lymph node| mammary gland| ovary| pancreas| placenta| prostate| skin| testis| thymus| tonsil| uterus| breast (mammary gland) tumor| cervical tumor| chondrosarcoma| colorectal tumor| germ cell tumor| glioma| head and neck tumor| liver tumor| lung tumor| lymphoma| normal| ovarian tumor| panc…	chr5	-	137620954	137674044	NM_001287582	P30307	GO:0000079 // GO:0000086 // GO:0000086 // GO:0000278 // GO:0006260 // GO:0007067 // GO:0007088 // GO:0007283 // GO:0008283 // GO:0016032 // GO:0035335 // GO:0035335 // GO:0051726 // GO:0006470 // GO:0007049 // GO:0051301	regulation of cyclin-dependent protein serine/threonine kinase activity // G2/M transition of mitotic cell cycle // G2/M transition of mitotic cell cycle // mitotic cell cycle // DNA replication // mitotic nuclear division // regulation of mitosis // spermatogenesis // cell proliferation // viral process // peptidyl-tyrosine dephosphorylation // peptidyl-tyrosine dephosphorylation // regulation o…	traceable author statement // inferred from genetic interaction // traceable author statement // traceable author statement // traceable author statement // inferred from electronic annotation // traceable author statement // inferred from electronic annotation // traceable author statement // inferred from electronic annotation // inferred from electronic annotation // non-traceable author state…	GO:0005634 // GO:0005654 // GO:0005829 // GO:0048471 // GO:0005622 // GO:0005634 // GO:0005737	nucleus // nucleoplasm // cytosol // perinuclear region of cytoplasm // intracellular // nucleus // cytoplasm	inferred from direct assay // traceable author statement // traceable author statement // inferred from electronic annotation // inferred from electronic annotation // inferred from electronic annotation // inferred from electronic annotation	GO:0004725 // GO:0005515 // GO:0019901 // GO:0050699 // GO:0004721 // GO:0004725 // GO:0016787	protein tyrosine phosphatase activity // protein binding // protein kinase binding // WW domain binding // phosphoprotein phosphatase activity // protein tyrosine phosphatase activity // hydrolase activity	non-traceable author statement // inferred from physical interaction // inferred from physical interaction // inferred from physical interaction // inferred from electronic annotation // inferred from electronic annotation // inferred from electronic annotation	GenMAPP	Cell_cycle_KEGG	---	---	---	17000439	35	1	main
16913681	7.2237	7.86313	8.61715	7.30136		7.54342	7.95926		NM_030919	FAM83D	family with sequence similarity 83, member D	20q11.23	NM_030919	RefSeq	Homo sapiens family with sequence similarity 83, member D (FAM83D), mRNA.	100	100	20	20	TRUE	Hs.726442	adrenal gland| ascites| brain| cervix| embryonic tissue| esophagus| eye| heart| intestine| kidney| liver| lung| lymph| lymph node| mammary gland| muscle| ovary| pancreas| placenta| skin| stomach| testis| thymus| thyroid| trachea| uterus| vascular|adrenal tumor| breast (mammary gland) tumor| cervical tumor| colorectal tumor| esophageal tumor| gastrointestinal tumor| germ cell tumor| head and neck …	chr20	+	37554955	37581703	NM_030919	Q9H4H8	GO:0007067 // GO:0007049 // GO:0051301	mitotic nuclear division // cell cycle // cell division	inferred from electronic annotation // inferred from electronic annotation // inferred from electronic annotation	GO:0000922 // GO:0005737 // GO:0005819 // GO:0005856	spindle pole // cytoplasm // spindle // cytoskeleton	inferred from electronic annotation // inferred from electronic annotation // inferred from electronic annotation // inferred from electronic annotation	---	---	---	---	---	---	---	---	16913681	20	1	main
16904573	10.2862	11.2138	7.71234	8.06312		10.75	7.88773		OTTHUMT00000333609	AC009495.4	putative novel transcript	---	OTTHUMT00000333609	Havana transcript	cdna:all chromosome:VEGA56:2:165794857:165846091:-1 Gene:OTTHUMG00000154038	100	100	16	16	TRUE	---	---	chr2	-	166651367	166702601	---	---	---	---	---	---	---	---	---	---	---	---	---	---	---	---	16904573	16	1	main
16956714	8.74967	9.15023	11.2116	10.8229		8.94995	11.0173		NM_080927	DCBLD2	discoidin, CUB and LCCL domain containing 2	3q12.1|3	NM_080927	RefSeq	Homo sapiens discoidin, CUB and LCCL domain containing 2 (DCBLD2), mRNA.	79	79	19	24	TRUE	Hs.203691	adrenal gland| ascites| bone| brain| connective tissue| embryonic tissue| esophagus| eye| heart| intestine| kidney| liver| lung| lymph node| mammary gland| mouth| muscle| nerve| ovary| pancreas| parathyroid| pharynx| placenta| prostate| skin| stomach| testis| thymus| thyroid| trachea| umbilical cord| uterus| vascular|adrenal tumor| breast (mammary gland) tumor| chondrosarcoma| colorectal tumor| e…	chr3	-	98514785	98620533	NM_080927	Q96PD2	GO:0007155 // GO:0030308 // GO:0030522 // GO:0042060	cell adhesion // negative regulation of cell growth // intracellular receptor signaling pathway // wound healing	inferred from electronic annotation // inferred from direct assay // non-traceable author statement // inferred from direct assay	GO:0005887 // GO:0009986 // GO:0016020 // GO:0016021	integral component of plasma membrane // cell surface // membrane // integral component of membrane	inferred from direct assay // inferred from direct assay // inferred from electronic annotation // inferred from electronic annotation	GO:0005515	protein binding	inferred from physical interaction	---	---	---	---	---	16956714	24	1	main
16988703	7.58419	8.69603	9.18989	8.05549		8.14011	8.62269		NM_005573	LMNB1	lamin B1	5q23.2	NM_005573	RefSeq	Homo sapiens lamin B1 (LMNB1), transcript variant 1, mRNA.	83	83	29	35	TRUE	Hs.89497	adrenal gland| bladder| blood| bone| bone marrow| brain| cervix| connective tissue| embryonic tissue| esophagus| eye| heart| intestine| kidney| larynx| liver| lung| lymph| lymph node| mammary gland| mouth| muscle| ovary| pancreas| placenta| prostate| skin| spleen| stomach| testis| thymus| thyroid| uterus|adrenal tumor| bladder carcinoma| breast (mammary gland) tumor| cervical tumor| chondrosarcom…	chr5	+	126112315	126172712	NM_005573	P20700	GO:0006915 // GO:0006921	apoptotic process // cellular component disassembly involved in execution phase of apoptosis	traceable author statement // traceable author statement	GO:0005635 // GO:0005637 // GO:0005638 // GO:0005654 // GO:0031965 // GO:0005634 // GO:0005635 // GO:0005638 // GO:0005654 // GO:0005882 // GO:0016020 // GO:0016020	nuclear envelope // nuclear inner membrane // lamin filament // nucleoplasm // nuclear membrane // nucleus // nuclear envelope // lamin filament // nucleoplasm // intermediate filament // membrane // membrane	traceable author statement // inferred from electronic annotation // inferred from electronic annotation // traceable author statement // inferred from direct assay // inferred from electronic annotation // inferred from electronic annotation // traceable author statement // inferred from electronic annotation // inferred from electronic annotation // inferred from direct assay // inferred from e…	GO:0005198 // GO:0043274 // GO:0005198	structural molecule activity // phospholipase binding // structural molecule activity	inferred from electronic annotation // inferred from electronic annotation // traceable author statement	---	---	---	---	---	16988703	35	1	main
16852312	6.8556	8.09924	8.34603	7.44019		7.47742	7.89311		NM_001039535	SKA1	spindle and kinetochore associated complex subunit 1	18q21.1	NM_001039535	RefSeq	Homo sapiens spindle and kinetochore associated complex subunit 1 (SKA1), transcript variant 1, mRNA.	100	100	23	23	TRUE	Hs.134726	adrenal gland| blood| bone marrow| brain| cervix| embryonic tissue| eye| intestine| kidney| liver| lung| lymph| lymph node| mammary gland| ovary| pancreas| pharynx| placenta| prostate| salivary gland| skin| testis| thymus| tonsil| uterus| vascular|adrenal tumor| cervical tumor| colorectal tumor| germ cell tumor| glioma| kidney tumor| leukemia| liver tumor| lung tumor| lymphoma| normal| ovarian tu…	chr18	+	47901365	47920543	NM_001039535	Q96BD8	GO:0000278 // GO:0007059 // GO:0007067 // GO:0031110 // GO:0051301 // GO:0007049 // GO:0007067 // GO:0051301	mitotic cell cycle // chromosome segregation // mitotic nuclear division // regulation of microtubule polymerization or depolymerization // cell division // cell cycle // mitotic nuclear division // cell division	traceable author statement // inferred from mutant phenotype // inferred from mutant phenotype // inferred from direct assay // inferred from mutant phenotype // inferred from electronic annotation // inferred from electronic annotation // inferred from electronic annotation	GO:0000940 // GO:0005829 // GO:0005876 // GO:0015630 // GO:0000775 // GO:0000776 // GO:0000777 // GO:0005694 // GO:0005737 // GO:0005819 // GO:0005856 // GO:0005874	condensed chromosome outer kinetochore // cytosol // spindle microtubule // microtubule cytoskeleton // chromosome, centromeric region // kinetochore // condensed chromosome kinetochore // chromosome // cytoplasm // spindle // cytoskeleton // microtubule	inferred from direct assay // traceable author statement // inferred from direct assay // inferred from direct assay // inferred from electronic annotation // inferred from electronic annotation // inferred from electronic annotation // inferred from electronic annotation // inferred from electronic annotation // inferred from electronic annotation // inferred from electronic annotation // inferr…	GO:0005515 // GO:0008017	protein binding // microtubule binding	inferred from physical interaction // inferred from direct assay	---	---	---	---	---	16852312	23	1	main
16749583	6.93392	6.36791	7.53983	7.45397		6.65092	7.4969		ENST00000182377	FAR2	fatty acyl CoA reductase 2	12p11.22	ENST00000182377	ENSEMBL	ensembl_havana_transcript:known chromosome:GRCh38:12:29223665:29334073:1 gene:ENSG00000064763 gene_biotype:protein_coding transcript_biotype:protein_coding	96	74	22	23	FALSE	Hs.728955 // Hs.684482	bladder| blood| brain| connective tissue| ear| embryonic tissue| eye| heart| intestine| kidney| lung| mammary gland| ovary| placenta| prostate| skin| stomach| testis| thymus| trachea| uterus| bladder carcinoma| breast (mammary gland) tumor| colorectal tumor| germ cell tumor| glioma| kidney tumor| leukemia| non-neoplasia| normal| ovarian tumor| primitive neuroectodermal tumor of the CNS| prostate …	chr12	+	29302036	29493913	ENST00000182377	Q96K12	GO:0008611 // GO:0035336 // GO:0044255 // GO:0044281 // GO:0055114 // GO:0006694 // GO:0009058 // GO:0044237 // GO:0006629	ether lipid biosynthetic process // long-chain fatty-acyl-CoA metabolic process // cellular lipid metabolic process // small molecule metabolic process // oxidation-reduction process // steroid biosynthetic process // biosynthetic process // cellular metabolic process // lipid metabolic process	traceable author statement // inferred from direct assay // traceable author statement // traceable author statement // inferred from electronic annotation // inferred from electronic annotation // inferred from electronic annotation // inferred from electronic annotation // inferred from electronic annotation	GO:0005777 // GO:0005778 // GO:0005782 // GO:0005789 // GO:0016021 // GO:0005777 // GO:0005783 // GO:0016020	peroxisome // peroxisomal membrane // peroxisomal matrix // endoplasmic reticulum membrane // integral component of membrane // peroxisome // endoplasmic reticulum // membrane	inferred from sequence or structural similarity // inferred from electronic annotation // traceable author statement // inferred from electronic annotation // inferred from electronic annotation // inferred from electronic annotation // inferred from electronic annotation // inferred from electronic annotation	GO:0050062 // GO:0080019 // GO:0003824 // GO:0003854 // GO:0016616 // GO:0050662 // GO:0080019 // GO:0016491 // GO:0016620	long-chain-fatty-acyl-CoA reductase activity // fatty-acyl-CoA reductase (alcohol-forming) activity // catalytic activity // 3-beta-hydroxy-delta5-steroid dehydrogenase activity // oxidoreductase activity, acting on the CH-OH group of donors, NAD or NADP as acceptor // coenzyme binding // fatty-acyl-CoA reductase (alcohol-forming) activity // oxidoreductase activity // oxidoreductase activity, ac…	inferred from electronic annotation // inferred from direct assay // inferred from electronic annotation // inferred from electronic annotation // inferred from electronic annotation // inferred from electronic annotation // inferred from electronic annotation // inferred from electronic annotation // inferred from electronic annotation	---	---	Pfam // Pfam // Pfam // Pfam // Pfam	IPR001509 // IPR002225 // IPR003869 // IPR013120 // IPR026055	NAD-dependent epimerase/dehydratase, N-terminal domain // 3-beta hydroxysteroid dehydrogenase/isomerase // Polysaccharide biosynthesis protein, CapD-like domain // Male sterility, NAD-binding // Fatty acyl-CoA reductase	16749583	31	1	main
16951485	7.54814	8.39779	9.09938	7.54376		7.97297	8.32157		NM_001012410	SGOL1	shugoshin-like 1 (S. pombe)	3p24.3	NM_001012410	RefSeq	Homo sapiens shugoshin-like 1 (S. pombe) (SGOL1), transcript variant A2, mRNA.	84	84	16	19	TRUE	Hs.105153	blood| bone| bone marrow| brain| cervix| embryonic tissue| esophagus| eye| intestine| kidney| liver| lung| lymph node| mammary gland| ovary| pharynx| placenta| prostate| salivary gland| testis| thymus| vascular| breast (mammary gland) tumor| cervical tumor| colorectal tumor| esophageal tumor| gastrointestinal tumor| germ cell tumor| kidney tumor| leukemia| liver tumor| normal| ovarian tumor| prim…	chr3	-	20202083	20227784	NM_001012410	Q5FBB7	GO:0000278 // GO:0007059 // GO:0007067 // GO:0008608 // GO:0010457 // GO:0010457 // GO:0045132 // GO:0007049 // GO:0007059 // GO:0045132 // GO:0051301	mitotic cell cycle // chromosome segregation // mitotic nuclear division // attachment of spindle microtubules to kinetochore // centriole-centriole cohesion // centriole-centriole cohesion // meiotic chromosome segregation // cell cycle // chromosome segregation // meiotic chromosome segregation // cell division	traceable author statement // inferred from direct assay // inferred from electronic annotation // inferred from direct assay // inferred from direct assay // inferred from mutant phenotype // inferred from mutant phenotype // inferred from electronic annotation // inferred from electronic annotation // inferred from electronic annotation // inferred from electronic annotation	GO:0000775 // GO:0000776 // GO:0000777 // GO:0000779 // GO:0000780 // GO:0000922 // GO:0005634 // GO:0005730 // GO:0005737 // GO:0005813 // GO:0005829 // GO:0030892 // GO:0000775 // GO:0000776 // GO:0000922 // GO:0005634 // GO:0005694 // GO:0005737 // GO:0005815 // GO:0005856	chromosome, centromeric region // kinetochore // condensed chromosome kinetochore // condensed chromosome, centromeric region // condensed nuclear chromosome, centromeric region // spindle pole // nucleus // nucleolus // cytoplasm // centrosome // cytosol // mitotic cohesin complex // chromosome, centromeric region // kinetochore // spindle pole // nucleus // chromosome // cytoplasm // microtubul…	inferred from direct assay // inferred from direct assay // inferred from electronic annotation // inferred from direct assay // inferred from electronic annotation // inferred from direct assay // inferred from direct assay // inferred from direct assay // inferred from direct assay // inferred from direct assay // traceable author statement // inferred from direct assay // inferred from electro…	GO:0005515 // GO:0019900	protein binding // kinase binding	inferred from physical interaction // inferred from direct assay	---	---	---	---	---	16951485	19	1	main
16760621	7.24869	8.3922	8.02429	7.52278		7.82044	7.77354		NM_031299	CDCA3	cell division cycle associated 3	12p13	NM_031299	RefSeq	Homo sapiens cell division cycle associated 3 (CDCA3), transcript variant 1, mRNA.	100	52	12	12	FALSE	Hs.524216	ascites| blood| bone| bone marrow| brain| connective tissue| embryonic tissue| eye| heart| intestine| kidney| liver| lung| lymph| lymph node| mammary gland| muscle| ovary| pancreas| pituitary gland| placenta| prostate| skin| stomach| testis| thymus| uterus| chondrosarcoma| colorectal tumor| gastrointestinal tumor| germ cell tumor| glioma| kidney tumor| leukemia| liver tumor| lung tumor| lymphoma|…	chr12	-	6953963	6961230	NM_031299	Q99618	GO:0007067 // GO:0016567 // GO:0007049 // GO:0008150 // GO:0051301	mitotic nuclear division // protein ubiquitination // cell cycle // biological_process // cell division	inferred from electronic annotation // inferred from electronic annotation // inferred from electronic annotation // no biological data available // inferred from electronic annotation	GO:0005829 // GO:0005575 // GO:0005737	cytosol // cellular_component // cytoplasm	inferred from electronic annotation // no biological data available // inferred from electronic annotation	GO:0003674	molecular_function	no biological data available	---	---	---	---	---	16760621	23	1	main
17075776	7.91936	8.68276	9.57486	8.29906		8.30106	8.93696		NM_001278945	PBK	PDZ binding kinase	8p21.2	NM_001278945	RefSeq	Homo sapiens PDZ binding kinase (PBK), transcript variant 2, mRNA.	86	86	19	22	TRUE	Hs.104741	ascites| blood| bone| bone marrow| brain| cervix| connective tissue| embryonic tissue| esophagus| eye| heart| intestine| kidney| liver| lung| lymph node| mammary gland| muscle| ovary| placenta| prostate| salivary gland| skin| stomach| testis| thymus| uterus| vascular| breast (mammary gland) tumor| cervical tumor| chondrosarcoma| esophageal tumor| gastrointestinal tumor| germ cell tumor| glioma| l…	chr8	-	27667137	27695612	NM_001278945	Q96KB5	GO:0006468 // GO:0007067 // GO:0016310	protein phosphorylation // mitotic nuclear division // phosphorylation	inferred from electronic annotation // non-traceable author statement // inferred from electronic annotation	GO:0005575	cellular_component	no biological data available	GO:0004674 // GO:0005515 // GO:0005524 // GO:0000166 // GO:0004672 // GO:0004674 // GO:0016301 // GO:0016740 // GO:0016772	protein serine/threonine kinase activity // protein binding // ATP binding // nucleotide binding // protein kinase activity // protein serine/threonine kinase activity // kinase activity // transferase activity // transferase activity, transferring phosphorus-containing groups	traceable author statement // inferred from physical interaction // inferred from electronic annotation // inferred from electronic annotation // inferred from electronic annotation // inferred from electronic annotation // inferred from electronic annotation // inferred from electronic annotation // inferred from electronic annotation	---	---	---	---	---	17075776	22	1	main
17023658	8.8661	7.39726	5.88721	5.28371		8.13168	5.58546		NM_015529	MOXD1	monooxygenase, DBH-like 1	6q23.2	NM_015529	RefSeq	Homo sapiens monooxygenase, DBH-like 1 (MOXD1), mRNA.	77	77	23	30	TRUE	Hs.6909	adrenal gland| bone| bone marrow| brain| connective tissue| ear| embryonic tissue| eye| intestine| kidney| larynx| liver| lung| mouth| ovary| pancreas| placenta| prostate| skin| stomach| testis| thyroid| trachea| uterus| vascular|adrenal tumor| chondrosarcoma| colorectal tumor| gastrointestinal tumor| germ cell tumor| glioma| head and neck tumor| liver tumor| lung tumor| non-neoplasia| normal| ov…	chr6	-	132617194	132722684	NM_015529	Q6UVY6	GO:0055114	oxidation-reduction process	inferred from electronic annotation	GO:0005789 // GO:0016021 // GO:0005783 // GO:0016020	endoplasmic reticulum membrane // integral component of membrane // endoplasmic reticulum // membrane	inferred from electronic annotation // inferred from electronic annotation // inferred from electronic annotation // inferred from electronic annotation	GO:0005507 // GO:0016715 // GO:0003824 // GO:0004497 // GO:0016491 // GO:0046872	copper ion binding // oxidoreductase activity, acting on paired donors, with incorporation or reduction of molecular oxygen, reduced ascorbate as one donor, and incorporation of one atom of oxygen // catalytic activity // monooxygenase activity // oxidoreductase activity // metal ion binding	inferred from electronic annotation // inferred from electronic annotation // inferred from electronic annotation // inferred from electronic annotation // inferred from electronic annotation // inferred from electronic annotation	---	---	---	---	---	17023658	30	1	main
16679411	6.57472	7.09473	8.67761	7.89498		6.83472	8.2863		NM_003686	EXO1	exonuclease 1	1q42-q43	NM_003686	RefSeq	Homo sapiens exonuclease 1 (EXO1), transcript variant 3, mRNA.	100	76	31	31	FALSE	Hs.498248	adrenal gland| ascites| bone| bone marrow| brain| cervix| connective tissue| ear| embryonic tissue| eye| heart| intestine| kidney| liver| lung| lymph node| mammary gland| mouth| placenta| salivary gland| skin| stomach| testis| thymus| uterus|adrenal tumor| breast (mammary gland) tumor| cervical tumor| chondrosarcoma| gastrointestinal tumor| germ cell tumor| glioma| head and neck tumor| kidney tum…	chr1	+	242011269	242058450	NM_003686	Q9UQ84	GO:0000737 // GO:0000738 // GO:0002455 // GO:0006281 // GO:0006298 // GO:0006298 // GO:0006298 // GO:0006298 // GO:0006310 // GO:0007126 // GO:0016446 // GO:0045190 // GO:0090305 // GO:0090305 // GO:0090502 // GO:0002376 // GO:0006281 // GO:0006298 // GO:0006310 // GO:0006974 // GO:0090305	DNA catabolic process, endonucleolytic // DNA catabolic process, exonucleolytic // humoral immune response mediated by circulating immunoglobulin // DNA repair // mismatch repair // mismatch repair // mismatch repair // mismatch repair // DNA recombination // meiotic nuclear division // somatic hypermutation of immunoglobulin genes // isotype switching // nucleic acid phosphodiester bond hydrolys…	inferred from direct assay // inferred from direct assay // inferred from electronic annotation // traceable author statement // inferred from direct assay // inferred from mutant phenotype // inferred from physical interaction // inferred from sequence or structural similarity // inferred from genetic interaction // inferred from electronic annotation // inferred from electronic annotation // in…	GO:0005634 // GO:0005634	nucleus // nucleus	inferred from direct assay // inferred from electronic annotation	GO:0003677 // GO:0004523 // GO:0004527 // GO:0005515 // GO:0008409 // GO:0035312 // GO:0043566 // GO:0045145 // GO:0046872 // GO:0048256 // GO:0051908 // GO:0003677 // GO:0003677 // GO:0003824 // GO:0004518 // GO:0004519 // GO:0004527 // GO:0008409 // GO:0016787 // GO:0016788	DNA binding // RNA-DNA hybrid ribonuclease activity // exonuclease activity // protein binding // 5'-3' exonuclease activity // 5'-3' exodeoxyribonuclease activity // structure-specific DNA binding // single-stranded DNA 5'-3' exodeoxyribonuclease activity // metal ion binding // flap endonuclease activity // double-stranded DNA 5'-3' exodeoxyribonuclease activity // DNA binding // DNA binding //…	inferred from direct assay // traceable author statement // traceable author statement // inferred from physical interaction // inferred from sequence or structural similarity // inferred from direct assay // inferred from electronic annotation // inferred from direct assay // inferred from electronic annotation // inferred from direct assay // inferred from direct assay // inferred from electron…	---	---	---	---	---	16679411	41	1	main
16847207	6.7025	8.0501	5.20404	4.93937		7.3763	5.07171		ENST00000364127	RNU1-85P	RNA, U1 small nuclear 85, pseudogene	---	ENST00000364127	ENSEMBL	ncrna:known chromosome:GRCh38:17:58679527:58679690:-1 gene:ENSG00000200997 gene_biotype:snRNA transcript_biotype:snRNA	100	100	9	9	TRUE	---	---	chr17	-	56756888	56757051	---	---	---	---	---	---	---	---	---	---	---	---	---	---	---	---	16847207	9	1	main
16792076	8.96108	7.65804	6.5966	6.40525		8.30956	6.50093		---	---	---	---	NONHSAT036405	NONCODE	Non-coding transcript identified by NONCODE: Linc	100	100	18	18	TRUE	---	---	chr14	-	36516920	36518080	---	---	---	---	---	---	---	---	---	---	---	---	---	---	---	---	16792076	18	1	main
16671013	7.08742	6.36117	4.19102	4.50581		6.7243	4.34842		OTTHUMT00000034017	RP11-107M16.2	novel transcript	---	OTTHUMT00000034017	Havana transcript	cdna:all chromosome:VEGA56:1:152205858:152207057:1 Gene:OTTHUMG00000012244	100	100	20	20	FALSE	---	---	chr1	+	152178334	152179533	---	---	---	---	---	---	---	---	---	---	---	---	---	---	---	---	16671013	20	1	main
16957170	7.22426	8.24212	8.97294	7.83201		7.7332	8.40248		NM_020890	KIAA1524	KIAA1524	3q13.13	NM_020890	RefSeq	Homo sapiens KIAA1524 (KIAA1524), mRNA.	88	88	21	24	TRUE	Hs.591308	blood| bone marrow| brain| cervix| embryonic tissue| esophagus| heart| intestine| kidney| liver| lung| lymph node| mammary gland| mouth| muscle| testis| thymus| trachea| uterus| vascular| breast (mammary gland) tumor| cervical tumor| colorectal tumor| esophageal tumor| germ cell tumor| glioma| head and neck tumor| leukemia| lung tumor| normal| ovarian tumor| primitive neuroectodermal tumor of the…	chr3	-	108268711	108308491	NM_020890	Q8TCG1	---	---	---	GO:0005737 // GO:0005886 // GO:0016021 // GO:0005737 // GO:0016020	cytoplasm // plasma membrane // integral component of membrane // cytoplasm // membrane	inferred from direct assay // inferred from direct assay // inferred from electronic annotation // inferred from electronic annotation // inferred from electronic annotation	GO:0005515	protein binding	inferred from physical interaction	---	---	---	---	---	16957170	24	1	main
16849379	7.49471	8.18696	10.3439	8.57127		7.84084	9.45759		NM_003258	TK1	thymidine kinase 1, soluble	17q23.2-q25.3	NM_003258	RefSeq	Homo sapiens thymidine kinase 1, soluble (TK1), mRNA.	100	100	25	25	TRUE	Hs.515122	adrenal gland| ascites| bladder| blood| bone| bone marrow| brain| cervix| embryonic tissue| esophagus| eye| heart| intestine| kidney| liver| lung| lymph| lymph node| mammary gland| mouth| muscle| nerve| ovary| pancreas| pharynx| placenta| prostate| salivary gland| skin| stomach| testis| thyroid| tonsil| uterus|adrenal tumor| breast (mammary gland) tumor| cervical tumor| chondrosarcoma| colorectal…	chr17	-	76170160	76183314	NM_003258	P04183	GO:0001889 // GO:0006139 // GO:0006206 // GO:0006260 // GO:0009157 // GO:0009157 // GO:0009165 // GO:0009636 // GO:0014856 // GO:0016310 // GO:0031667 // GO:0043097 // GO:0044281 // GO:0046104 // GO:0046688 // GO:0048565 // GO:0051289 // GO:0051414 // GO:0055086 // GO:0060138 // GO:0009165	liver development // nucleobase-containing compound metabolic process // pyrimidine nucleobase metabolic process // DNA replication // deoxyribonucleoside monophosphate biosynthetic process // deoxyribonucleoside monophosphate biosynthetic process // nucleotide biosynthetic process // response to toxic substance // skeletal muscle cell proliferation // phosphorylation // response to nutrient leve…	inferred from electronic annotation // traceable author statement // traceable author statement // inferred from electronic annotation // inferred from electronic annotation // traceable author statement // not recorded // inferred from electronic annotation // inferred from electronic annotation // inferred from electronic annotation // inferred from electronic annotation // traceable author sta…	GO:0005829 // GO:0005737	cytosol // cytoplasm	traceable author statement // inferred from electronic annotation	GO:0004797 // GO:0005524 // GO:0008270 // GO:0019206 // GO:0042802 // GO:0000166 // GO:0004797 // GO:0016301 // GO:0016740 // GO:0019206 // GO:0042802 // GO:0046872	thymidine kinase activity // ATP binding // zinc ion binding // nucleoside kinase activity // identical protein binding // nucleotide binding // thymidine kinase activity // kinase activity // transferase activity // nucleoside kinase activity // identical protein binding // metal ion binding	inferred from electronic annotation // inferred from electronic annotation // inferred from direct assay // not recorded // inferred from physical interaction // inferred from electronic annotation // traceable author statement // inferred from electronic annotation // inferred from electronic annotation // --- // inferred from electronic annotation // inferred from electronic annotation	HumanCyc // HumanCyc	P1-PWY // PWY0-181	---	---	---	16849379	25	1	main
16917969	8.13475	7.81166	4.73265	4.9246		7.97321	4.82862		NM_001900	CST5	cystatin D	20p11.21	NM_001900	RefSeq	Homo sapiens cystatin D (CST5), mRNA.	100	100	12	12	TRUE	Hs.121489	mammary gland| salivary gland| breast (mammary gland) tumor| normal| adult	chr20	-	23856572	23860387	NM_001900	P28325	GO:0010951 // GO:0010951 // GO:0010951 // GO:0010466	negative regulation of endopeptidase activity // negative regulation of endopeptidase activity // negative regulation of endopeptidase activity // negative regulation of peptidase activity	inferred from direct assay // inferred from electronic annotation // traceable author statement // inferred from electronic annotation	GO:0005576 // GO:0070062 // GO:0005576	extracellular region // extracellular vesicular exosome // extracellular region	inferred from direct assay // inferred from direct assay // inferred from electronic annotation	GO:0004869 // GO:0005515 // GO:0004869 // GO:0004869 // GO:0030414	cysteine-type endopeptidase inhibitor activity // protein binding // cysteine-type endopeptidase inhibitor activity // cysteine-type endopeptidase inhibitor activity // peptidase inhibitor activity	inferred from direct assay // inferred from physical interaction // inferred from electronic annotation // traceable author statement // inferred from electronic annotation	---	---	---	---	---	16917969	12	1	main
17070120	5.85763	6.6433	7.58296	7.85837		6.25047	7.72066		NM_031461	CRISPLD1	cysteine-rich secretory protein LCCL domain containing 1	8q21.11	NM_031461	RefSeq	Homo sapiens cysteine-rich secretory protein LCCL domain containing 1 (CRISPLD1), transcript variant 1, mRNA.	95	95	40	42	TRUE	Hs.436542	bone| bone marrow| brain| connective tissue| ear| embryonic tissue| esophagus| eye| heart| kidney| liver| lung| mammary gland| mouth| ovary| pancreas| placenta| prostate| stomach| testis| thymus| trachea| uterus| vascular| breast (mammary gland) tumor| chondrosarcoma| esophageal tumor| gastrointestinal tumor| germ cell tumor| glioma| head and neck tumor| leukemia| non-neoplasia| normal| ovarian t…	chr8	+	75896708	75946793	NM_031461	Q9H336	GO:0060325	face morphogenesis	inferred from mutant phenotype	GO:0070062 // GO:0005576	extracellular vesicular exosome // extracellular region	inferred from direct assay // inferred from electronic annotation	GO:0003674	molecular_function	no biological data available	---	---	---	---	---	17070120	42	1	main
16798919	8.23532	8.91957	9.38012	7.99647		8.57745	8.68829		NM_001286480	ARHGAP11A	Rho GTPase activating protein 11A	15q13.2	NM_001286480	RefSeq	Homo sapiens Rho GTPase activating protein 11A (ARHGAP11A), transcript variant 4, mRNA.	83	83	15	18	TRUE	Hs.591130	adrenal gland| ascites| bladder| blood| bone| bone marrow| brain| connective tissue| embryonic tissue| eye| heart| intestine| kidney| larynx| liver| lung| lymph| lymph node| mouth| muscle| pancreas| placenta| prostate| skin| stomach| testis| thymus| trachea| uterus| vascular|adrenal tumor| bladder carcinoma| chondrosarcoma| colorectal tumor| gastrointestinal tumor| germ cell tumor| glioma| head a…	chr15	+	32907691	32932150	NM_001286480	Q6P4F7	GO:0007264 // GO:0043547 // GO:0051056 // GO:0007165	small GTPase mediated signal transduction // positive regulation of GTPase activity // regulation of small GTPase mediated signal transduction // signal transduction	traceable author statement // inferred from electronic annotation // traceable author statement // inferred from electronic annotation	GO:0005829 // GO:0005622	cytosol // intracellular	traceable author statement // inferred from electronic annotation	GO:0005096	GTPase activator activity	inferred from electronic annotation	---	---	---	---	---	16798919	18	1	main
16931225	6.81842	7.77215	6.1248	5.89982		7.29528	6.01231		OTTHUMT00000322250	RIBC2	RIB43A domain with coiled-coils 2	---	OTTHUMT00000322250	Havana transcript	cdna:all chromosome:VEGA56:22:45413691:45432496:1 Gene:OTTHUMG00000151332	76	76	19	25	TRUE	---	---	chr22	+	45809572	45828376	NM_015653	Q9H4K1	---	---	---	---	---	---	---	---	---	---	---	Pfam	IPR008805	RIB43A	16931225	25	1	main
16761012	8.6087	8.36677	5.29549	6.88393		8.48774	6.08971		NM_000014	A2M	alpha-2-macroglobulin	12p13.31	NM_000014	RefSeq	Homo sapiens alpha-2-macroglobulin (A2M), mRNA.	100	72	21	21	FALSE	Hs.212838	adipose tissue| adrenal gland| bladder| blood| bone| bone marrow| brain| cervix| connective tissue| ear| embryonic tissue| esophagus| eye| heart| intestine| kidney| larynx| liver| lung| lymph node| mammary gland| mouth| muscle| nerve| ovary| pancreas| parathyroid| pharynx| pituitary gland| placenta| prostate| skin| spleen| stomach| testis| thymus| thyroid| trachea| uterus| vascular|adrenal tumor|…	chr12	-	9220260	9268825	NM_000014	P01023	GO:0001869 // GO:0002576 // GO:0007264 // GO:0007596 // GO:0007597 // GO:0010951 // GO:0010951 // GO:0022617 // GO:0030168 // GO:0030198 // GO:0048863 // GO:0051056 // GO:0010466	negative regulation of complement activation, lectin pathway // platelet degranulation // small GTPase mediated signal transduction // blood coagulation // blood coagulation, intrinsic pathway // negative regulation of endopeptidase activity // negative regulation of endopeptidase activity // extracellular matrix disassembly // platelet activation // extracellular matrix organization // stem cell…	inferred from direct assay // traceable author statement // traceable author statement // traceable author statement // traceable author statement // inferred from direct assay // inferred from electronic annotation // traceable author statement // traceable author statement // traceable author statement // inferred from electronic annotation // traceable author statement // inferred from electro…	GO:0005576 // GO:0005576 // GO:0005829 // GO:0031093 // GO:0070062 // GO:0072562 // GO:0005576 // GO:0005615	extracellular region // extracellular region // cytosol // platelet alpha granule lumen // extracellular vesicular exosome // blood microparticle // extracellular region // extracellular space	non-traceable author statement // traceable author statement // traceable author statement // traceable author statement // inferred from direct assay // inferred from direct assay // inferred from electronic annotation // inferred from electronic annotation	GO:0002020 // GO:0004867 // GO:0005102 // GO:0005515 // GO:0019838 // GO:0019899 // GO:0019959 // GO:0019966 // GO:0043120 // GO:0048306 // GO:0004866 // GO:0004867 // GO:0030414	protease binding // serine-type endopeptidase inhibitor activity // receptor binding // protein binding // growth factor binding // enzyme binding // interleukin-8 binding // interleukin-1 binding // tumor necrosis factor binding // calcium-dependent protein binding // endopeptidase inhibitor activity // serine-type endopeptidase inhibitor activity // peptidase inhibitor activity	inferred from physical interaction // inferred from direct assay // inferred from mutant phenotype // inferred from physical interaction // inferred from direct assay // inferred from physical interaction // inferred from physical interaction // inferred from direct assay // inferred from direct assay // inferred from physical interaction // inferred from electronic annotation // inferred from el…	---	---	---	---	---	16761012	29	1	main
16691883	6.03381	6.36511	6.67396	5.77606		6.19946	6.22501		ENST00000369175	FAM72C	family with sequence similarity 72, member C	1q21.2	ENST00000369175	ENSEMBL	havana:novel chromosome:GRCh38:1:143955878:143971965:-1 gene:ENSG00000263513 gene_biotype:protein_coding transcript_biotype:protein_coding gene:ENSG00000203817	100	50	5	5	FALSE	Hs.568238 // Hs.744303 // Hs.735819	embryonic tissue| lung| skin| spleen| testis| germ cell tumor| lung tumor| normal| skin tumor| fetus| adult // bone marrow| pancreas| prostate| leukemia| normal| pancreatic tumor| prostate cancer // mammary gland| breast (mammary gland) tumor| adult	chr1	-	143896452	143913143	ENST00000369175	H0Y354	---	---	---	---	---	---	---	---	---	---	---	---	---	---	16691883	10	3	main
16840902	9.18537	10.2317	9.79792	8.97724		9.70853	9.38758		NM_001256834	AURKB	aurora kinase B	17p13.1	NM_001256834	RefSeq	Homo sapiens aurora kinase B (AURKB), transcript variant 2, mRNA.	100	100	19	19	TRUE	Hs.442658	ascites| bladder| blood| bone| bone marrow| brain| cervix| connective tissue| embryonic tissue| esophagus| eye| intestine| kidney| liver| lung| lymph| lymph node| mammary gland| muscle| ovary| pancreas| pharynx| placenta| prostate| salivary gland| skin| stomach| testis| thymus| tonsil| uterus| breast (mammary gland) tumor| cervical tumor| chondrosarcoma| colorectal tumor| esophageal tumor| gastro…	chr17	-	8108049	8113936	NM_001256834	Q96GD4	GO:0000122 // GO:0000278 // GO:0002903 // GO:0006468 // GO:0007568 // GO:0008283 // GO:0008608 // GO:0009838 // GO:0016570 // GO:0031145 // GO:0031565 // GO:0031577 // GO:0032091 // GO:0032466 // GO:0032467 // GO:0032467 // GO:0034501 // GO:0034644 // GO:0036089 // GO:0043146 // GO:0043988 // GO:0046777 // GO:0051256 // GO:0051256 // GO:0051983 // GO:0006468 // GO:0007049 // GO:0007067 // GO:0016…	negative regulation of transcription from RNA polymerase II promoter // mitotic cell cycle // negative regulation of B cell apoptotic process // protein phosphorylation // aging // cell proliferation // attachment of spindle microtubules to kinetochore // abscission // histone modification // anaphase-promoting complex-dependent proteasomal ubiquitin-dependent protein catabolic process // cytokin…	inferred from direct assay // traceable author statement // inferred from direct assay // inferred from direct assay // inferred from electronic annotation // inferred from electronic annotation // traceable author statement // inferred from sequence or structural similarity // traceable author statement // traceable author statement // inferred from sequence or structural similarity // inferred …	GO:0000779 // GO:0000780 // GO:0005634 // GO:0005730 // GO:0005819 // GO:0005829 // GO:0010369 // GO:0030496 // GO:0030496 // GO:0032133 // GO:0032133 // GO:0045171 // GO:0000775 // GO:0005634 // GO:0005694 // GO:0005737 // GO:0005819 // GO:0005856 // GO:0030496 // GO:0032133	condensed chromosome, centromeric region // condensed nuclear chromosome, centromeric region // nucleus // nucleolus // spindle // cytosol // chromocenter // midbody // midbody // chromosome passenger complex // chromosome passenger complex // intercellular bridge // chromosome, centromeric region // nucleus // chromosome // cytoplasm // spindle // cytoskeleton // midbody // chromosome passenger …	inferred from direct assay // inferred from direct assay // inferred from direct assay // inferred from direct assay // traceable author statement // traceable author statement // inferred from electronic annotation // inferred from direct assay // traceable author statement // inferred from physical interaction // traceable author statement // inferred from direct assay // inferred from electron…	GO:0004674 // GO:0004712 // GO:0005515 // GO:0005524 // GO:0035174 // GO:0046872 // GO:0000166 // GO:0004672 // GO:0004674 // GO:0016301 // GO:0016740 // GO:0016772	protein serine/threonine kinase activity // protein serine/threonine/tyrosine kinase activity // protein binding // ATP binding // histone serine kinase activity // metal ion binding // nucleotide binding // protein kinase activity // protein serine/threonine kinase activity // kinase activity // transferase activity // transferase activity, transferring phosphorus-containing groups	inferred from direct assay // traceable author statement // inferred from physical interaction // inferred from electronic annotation // inferred from sequence or structural similarity // inferred from electronic annotation // inferred from electronic annotation // inferred from electronic annotation // inferred from electronic annotation // inferred from electronic annotation // inferred from el…	---	---	---	---	---	16840902	19	1	main
17016221	6.94953	7.8908	5.33592	6.03674		7.42016	5.68633		NM_014722	FAM65B	family with sequence similarity 65, member B	6p22.3-p21.32	NM_014722	RefSeq	Homo sapiens family with sequence similarity 65, member B (FAM65B), transcript variant 1, mRNA.	77	77	17	22	TRUE	Hs.559459	adipose tissue| blood| bone marrow| brain| connective tissue| embryonic tissue| eye| intestine| kidney| liver| lung| lymph node| mammary gland| muscle| pancreas| pharynx| pituitary gland| placenta| prostate| skin| spleen| stomach| testis| thymus| thyroid| tonsil| trachea| uterus| vascular| breast (mammary gland) tumor| chondrosarcoma| colorectal tumor| germ cell tumor| glioma| leukemia| lymphoma|…	chr6	-	24804513	25042238	NM_014722	Q9Y4F9	GO:0007517 // GO:0030154 // GO:0007275	muscle organ development // cell differentiation // multicellular organismal development	inferred from electronic annotation // inferred from electronic annotation // inferred from electronic annotation	GO:0005739 // GO:0005856 // GO:0030175 // GO:0005737 // GO:0042995	mitochondrion // cytoskeleton // filopodium // cytoplasm // cell projection	inferred from electronic annotation // inferred from electronic annotation // inferred from electronic annotation // inferred from electronic annotation // inferred from electronic annotation	---	---	---	---	---	---	---	---	17016221	22	1	main
16670387	7.49513	8.97211	9.269	8.22227		8.23362	8.74564		NM_001005464	HIST2H3A	histone cluster 2, H3a	1q21.2	NM_001005464	RefSeq	Homo sapiens histone cluster 2, H3a (HIST2H3A), mRNA.	100	70	19	19	FALSE	Hs.706618	---	chr1	+	149824181	149825836	NM_001005464	Q71DI3	GO:0006334 // GO:0007596	nucleosome assembly // blood coagulation	inferred from electronic annotation // traceable author statement	GO:0000786 // GO:0005576 // GO:0005634 // GO:0005634 // GO:0005654 // GO:0005694 // GO:0070062	nucleosome // extracellular region // nucleus // nucleus // nucleoplasm // chromosome // extracellular vesicular exosome	inferred from electronic annotation // traceable author statement // inferred from direct assay // inferred from electronic annotation // traceable author statement // inferred from electronic annotation // inferred from direct assay	GO:0003677 // GO:0005515 // GO:0046982	DNA binding // protein binding // protein heterodimerization activity	inferred from electronic annotation // inferred from physical interaction // inferred from electronic annotation	---	---	---	---	---	16670387	27	3	main
16692616	7.49513	8.97211	9.269	8.22227		8.23362	8.74564		NM_001005464	HIST2H3A	histone cluster 2, H3a	1q21.2	NM_001005464	RefSeq	Homo sapiens histone cluster 2, H3a (HIST2H3A), mRNA.	100	70	19	19	FALSE	Hs.706618	---	chr1	-	149811110	149812765	NM_001005464	Q71DI3	GO:0006334 // GO:0007596	nucleosome assembly // blood coagulation	inferred from electronic annotation // traceable author statement	GO:0000786 // GO:0005576 // GO:0005634 // GO:0005634 // GO:0005654 // GO:0005694 // GO:0070062	nucleosome // extracellular region // nucleus // nucleus // nucleoplasm // chromosome // extracellular vesicular exosome	inferred from electronic annotation // traceable author statement // inferred from direct assay // inferred from electronic annotation // traceable author statement // inferred from electronic annotation // inferred from direct assay	GO:0003677 // GO:0005515 // GO:0046982	DNA binding // protein binding // protein heterodimerization activity	inferred from electronic annotation // inferred from physical interaction // inferred from electronic annotation	---	---	---	---	---	16692616	27	3	main
16909595	7.21584	6.12256	4.82554	4.95425		6.6692	4.8899		NM_002242	KCNJ13	potassium inwardly-rectifying channel, subfamily J, member 13	2q37	NM_002242	RefSeq	Homo sapiens potassium inwardly-rectifying channel, subfamily J, member 13 (KCNJ13), transcript variant 1, mRNA.	79	79	23	29	TRUE	Hs.467338	adrenal gland| brain| eye| intestine| kidney| liver| lung| muscle| parathyroid| prostate| skin| thymus|adrenal tumor| germ cell tumor| kidney tumor| normal| fetus| juvenile| adult	chr2	-	233624856	233641278	NM_002242	O60928	GO:0006813 // GO:0034765 // GO:0071805 // GO:0071805 // GO:0006810 // GO:0006811 // GO:0006813	potassium ion transport // regulation of ion transmembrane transport // potassium ion transmembrane transport // potassium ion transmembrane transport // transport // ion transport // potassium ion transport	non-traceable author statement // inferred from electronic annotation // inferred from electronic annotation // non-traceable author statement // inferred from electronic annotation // inferred from electronic annotation // inferred from electronic annotation	GO:0016021 // GO:0016020	integral component of membrane // membrane	inferred from electronic annotation // inferred from electronic annotation	GO:0005242 // GO:0005242 // GO:0005244	inward rectifier potassium channel activity // inward rectifier potassium channel activity // voltage-gated ion channel activity	non-traceable author statement // inferred from electronic annotation // inferred from electronic annotation	---	---	---	---	---	16909595	29	1	main
16779958	10.0615	8.9522	10.0239	10.1222		9.50683	10.0731		NM_000115	EDNRB	endothelin receptor type B	13q22	NM_000115	RefSeq	Homo sapiens endothelin receptor type B (EDNRB), transcript variant 1, mRNA.	95	74	19	20	FALSE	Hs.82002	adrenal gland| brain| connective tissue| ear| embryonic tissue| eye| heart| intestine| kidney| liver| lung| mammary gland| mouth| muscle| nerve| ovary| pancreas| placenta| prostate| skin| spleen| stomach| testis| trachea| uterus| vascular|adrenal tumor| breast (mammary gland) tumor| gastrointestinal tumor| germ cell tumor| glioma| head and neck tumor| kidney tumor| liver tumor| lung tumor| non-ne…	chr13	-	78469616	78549664	NM_000115	P24530	GO:0000122 // GO:0000122 // GO:0001755 // GO:0001934 // GO:0006885 // GO:0007166 // GO:0007194 // GO:0007200 // GO:0007204 // GO:0007399 // GO:0007422 // GO:0007497 // GO:0007568 // GO:0008217 // GO:0008284 // GO:0014043 // GO:0014070 // GO:0014826 // GO:0019233 // GO:0019934 // GO:0030318 // GO:0031620 // GO:0032269 // GO:0035645 // GO:0035810 // GO:0035815 // GO:0042045 // GO:0042310 // GO:0042…	negative regulation of transcription from RNA polymerase II promoter // negative regulation of transcription from RNA polymerase II promoter // neural crest cell migration // positive regulation of protein phosphorylation // regulation of pH // cell surface receptor signaling pathway // negative regulation of adenylate cyclase activity // phospholipase C-activating G-protein coupled receptor sign…	inferred from mutant phenotype // inferred from sequence or structural similarity // inferred from electronic annotation // inferred from electronic annotation // inferred from electronic annotation // traceable author statement // traceable author statement // inferred from electronic annotation // inferred from electronic annotation // traceable author statement // inferred from electronic anno…	GO:0005886 // GO:0005887 // GO:0031965 // GO:0045121 // GO:0005886 // GO:0016020 // GO:0016021	plasma membrane // integral component of plasma membrane // nuclear membrane // membrane raft // plasma membrane // membrane // integral component of membrane	traceable author statement // traceable author statement // inferred from electronic annotation // inferred from electronic annotation // inferred from electronic annotation // inferred from electronic annotation // inferred from electronic annotation	GO:0004962 // GO:0004962 // GO:0005515 // GO:0017046 // GO:0031702 // GO:0004871 // GO:0004930 // GO:0004962	endothelin receptor activity // endothelin receptor activity // protein binding // peptide hormone binding // type 1 angiotensin receptor binding // signal transducer activity // G-protein coupled receptor activity // endothelin receptor activity	inferred from direct assay // inferred from mutant phenotype // inferred from physical interaction // inferred from physical interaction // inferred from electronic annotation // inferred from electronic annotation // inferred from electronic annotation // inferred from electronic annotation	GenMAPP // GenMAPP // GenMAPP	Prostaglandin_synthesis_regulation // GPCRDB_Class_A_Rhodopsin-like // Peptide_GPCRs	---	---	---	16779958	27	1	main
16707551	7.38504	8.01267	9.07738	7.74158		7.69885	8.40948		NM_001127182	CEP55	centrosomal protein 55kDa	10q23.33	NM_001127182	RefSeq	Homo sapiens centrosomal protein 55kDa (CEP55), transcript variant 2, mRNA.	100	74	20	20	FALSE	Hs.14559	ascites| bladder| blood| bone| bone marrow| brain| cervix| connective tissue| embryonic tissue| eye| intestine| kidney| liver| lung| lymph| lymph node| mammary gland| mouth| muscle| ovary| pancreas| parathyroid| placenta| prostate| skin| testis| thymus| uterus| vascular| bladder carcinoma| breast (mammary gland) tumor| cervical tumor| chondrosarcoma| colorectal tumor| gastrointestinal tumor| germ…	chr10	+	95256369	95288849	NM_001127182	Q53EZ4	GO:0000281 // GO:0007067 // GO:0045184 // GO:0007049 // GO:0051301	mitotic cytokinesis // mitotic nuclear division // establishment of protein localization // cell cycle // cell division	inferred from genetic interaction // inferred from electronic annotation // inferred from mutant phenotype // inferred from electronic annotation // inferred from electronic annotation	GO:0005813 // GO:0005814 // GO:0030496 // GO:0032154 // GO:0045171 // GO:0005737 // GO:0005815 // GO:0005856 // GO:0016020 // GO:0030496	centrosome // centriole // midbody // cleavage furrow // intercellular bridge // cytoplasm // microtubule organizing center // cytoskeleton // membrane // midbody	inferred from direct assay // inferred from electronic annotation // inferred from direct assay // inferred from electronic annotation // inferred from electronic annotation // inferred from electronic annotation // inferred from electronic annotation // inferred from electronic annotation // inferred from direct assay // inferred from electronic annotation	GO:0005515	protein binding	inferred from physical interaction	---	---	---	---	---	16707551	27	1	main
16991638	5.87848	6.58787	4.89839	4.44475		6.23317	4.67157		OTTHUMT00000373933	RP11-542A14.1	novel transcript	---	OTTHUMT00000373933	Havana transcript	cdna:all chromosome:VEGA56:5:158424585:158452758:1 Gene:OTTHUMG00000163518	100	100	26	26	TRUE	---	---	chr5	+	157851593	157879766	---	---	---	---	---	---	---	---	---	---	---	---	---	---	---	---	16991638	26	1	main
17064939	8.5601	9.38965	8.78336	7.68686		8.97487	8.23511		NM_001281932	NCAPG2	non-SMC condensin II complex, subunit G2	7q36.3	NM_001281932	RefSeq	Homo sapiens non-SMC condensin II complex, subunit G2 (NCAPG2), transcript variant 2, mRNA.	75	75	27	36	TRUE	Hs.18616	ascites| blood| bone| bone marrow| brain| cervix| connective tissue| embryonic tissue| eye| intestine| kidney| larynx| liver| lung| lymph| lymph node| mammary gland| mouth| muscle| ovary| placenta| prostate| salivary gland| skin| stomach| testis| thymus| thyroid| tonsil| trachea| uterus| breast (mammary gland) tumor| cervical tumor| chondrosarcoma| colorectal tumor| gastrointestinal tumor| germ c…	chr7	-	158424003	158497520	NM_001281932	Q86XI2	GO:0000278 // GO:0001833 // GO:0007067 // GO:0030261 // GO:0007049 // GO:0051301	mitotic cell cycle // inner cell mass cell proliferation // mitotic nuclear division // chromosome condensation // cell cycle // cell division	traceable author statement // inferred from electronic annotation // inferred from electronic annotation // inferred from electronic annotation // inferred from electronic annotation // inferred from electronic annotation	GO:0005634 // GO:0005654 // GO:0005730 // GO:0005634 // GO:0016020	nucleus // nucleoplasm // nucleolus // nucleus // membrane	inferred from direct assay // traceable author statement // inferred from direct assay // inferred from electronic annotation // inferred from direct assay	GO:0005515 // GO:0035064	protein binding // methylated histone binding	inferred from physical interaction // inferred from direct assay	---	---	---	---	---	17064939	36	1	main
16957951	6.59115	7.48767	7.65233	6.49142		7.03941	7.07188		NM_199420	POLQ	polymerase (DNA directed), theta	3q13.33	NM_199420	RefSeq	Homo sapiens polymerase (DNA directed), theta (POLQ), mRNA.	96	96	24	25	TRUE	Hs.241517	adrenal gland| blood| bone| brain| connective tissue| ear| embryonic tissue| eye| intestine| kidney| larynx| liver| lung| lymph| lymph node| mammary gland| mouth| muscle| ovary| pharynx| skin| stomach| testis| thymus| trachea| uterus| vascular|adrenal tumor| breast (mammary gland) tumor| colorectal tumor| germ cell tumor| glioma| head and neck tumor| kidney tumor| leukemia| lymphoma| normal| ovar…	chr3	-	121150273	121265488	NM_199420	O75417	GO:0006200 // GO:0006261 // GO:0006261 // GO:0006261 // GO:0006281 // GO:0006260 // GO:0006281 // GO:0006974	ATP catabolic process // DNA-dependent DNA replication // DNA-dependent DNA replication // DNA-dependent DNA replication // DNA repair // DNA replication // DNA repair // cellular response to DNA damage stimulus	inferred from direct assay // inferred from direct assay // inferred from electronic annotation // traceable author statement // inferred from electronic annotation // inferred from electronic annotation // traceable author statement // inferred from electronic annotation	GO:0005654	nucleoplasm	traceable author statement	GO:0003684 // GO:0003887 // GO:0004386 // GO:0005524 // GO:0043142 // GO:0000166 // GO:0003676 // GO:0003677 // GO:0003887 // GO:0003887 // GO:0016740 // GO:0016779	damaged DNA binding // DNA-directed DNA polymerase activity // helicase activity // ATP binding // single-stranded DNA-dependent ATPase activity // nucleotide binding // nucleic acid binding // DNA binding // DNA-directed DNA polymerase activity // DNA-directed DNA polymerase activity // transferase activity // nucleotidyltransferase activity	traceable author statement // inferred from direct assay // inferred from electronic annotation // inferred from electronic annotation // inferred from direct assay // inferred from electronic annotation // inferred from electronic annotation // inferred from electronic annotation // inferred from electronic annotation // traceable author statement // inferred from electronic annotation // inferr…	---	---	---	---	---	16957951	25	1	main
17092531	7.84529	8.0486	5.37051	5.30685		7.94695	5.33868		NM_144966	FREM1	FRAS1 related extracellular matrix 1	9p22.3	NM_144966	RefSeq	Homo sapiens FRAS1 related extracellular matrix 1 (FREM1), transcript variant 1, mRNA.	89	89	34	38	TRUE	Hs.50850	bone| brain| connective tissue| ear| embryonic tissue| eye| heart| intestine| kidney| liver| lung| muscle| nerve| ovary| placenta| skin| testis| uterus| germ cell tumor| kidney tumor| non-neoplasia| normal| ovarian tumor| primitive neuroectodermal tumor of the CNS| skin tumor| soft tissue/muscle tissue tumor| uterine tumor|embryoid body| blastocyst| fetus| juvenile| adult	chr9	-	14734664	14910993	NM_144966	Q5H8C1	GO:0007154 // GO:0007160 // GO:0097094 // GO:0007155 // GO:0007275	cell communication // cell-matrix adhesion // craniofacial suture morphogenesis // cell adhesion // multicellular organismal development	inferred from electronic annotation // inferred from electronic annotation // inferred from mutant phenotype // inferred from electronic annotation // inferred from electronic annotation	GO:0005604 // GO:0016021 // GO:0005576 // GO:0005578	basement membrane // integral component of membrane // extracellular region // proteinaceous extracellular matrix	inferred from electronic annotation // inferred from electronic annotation // inferred from electronic annotation // inferred from electronic annotation	GO:0030246 // GO:0046872	carbohydrate binding // metal ion binding	inferred from electronic annotation // inferred from electronic annotation	---	---	---	---	---	17092531	38	1	main
16802461	5.98952	6.61717	3.99781	4.15389		6.30335	4.07585		NR_026949	LINC00277	long intergenic non-protein coding RNA 277	15q23	NR_026949	RefSeq	Homo sapiens long intergenic non-protein coding RNA 277 (LINC00277), long non-coding RNA.	67	67	18	27	TRUE	Hs.177927	brain| lung| mammary gland| skin| testis| uterus| breast (mammary gland) tumor| lung tumor| normal| primitive neuroectodermal tumor of the CNS| skin tumor| uterine tumor| juvenile| adult	chr15	+	69365266	69392275	NR_026949	A8K809	---	---	---	---	---	---	---	---	---	---	---	---	---	---	16802461	27	1	main
16755712	7.97591	9.1745	4.55913	4.65826		8.57521	4.60869		NM_001286615	ANO4	anoctamin 4	12q23.1	NM_001286615	RefSeq	Homo sapiens anoctamin 4 (ANO4), transcript variant 1, mRNA.	100	81	25	25	FALSE	Hs.58785	brain| embryonic tissue| kidney| lung| pituitary gland| prostate| skin| testis| uterus| germ cell tumor| head and neck tumor| kidney tumor| normal|embryoid body| fetus| adult	chr12	+	101111304	101522419	NM_001286615	Q32M45	GO:0006821 // GO:0034220 // GO:0055085 // GO:1902476	chloride transport // ion transmembrane transport // transmembrane transport // chloride transmembrane transport	inferred from direct assay // traceable author statement // traceable author statement // inferred from direct assay	GO:0005622 // GO:0005886 // GO:0005886 // GO:0016021 // GO:0005886 // GO:0016020	intracellular // plasma membrane // plasma membrane // integral component of membrane // plasma membrane // membrane	inferred from sequence or structural similarity // inferred from direct assay // traceable author statement // inferred from electronic annotation // inferred from electronic annotation // inferred from electronic annotation	GO:0005229	intracellular calcium activated chloride channel activity	inferred from direct assay	---	---	---	---	---	16755712	31	1	main
16732584	6.82798	6.92388	5.02309	4.97675		6.87593	4.99992		NM_003105	SORL1	sortilin-related receptor, L(DLR class) A repeats containing	11q23.2-q24.2	NM_003105	RefSeq	Homo sapiens sortilin-related receptor, L(DLR class) A repeats containing (SORL1), mRNA.	98	79	41	42	FALSE	Hs.368592	adipose tissue| bladder| blood| bone| bone marrow| brain| connective tissue| ear| embryonic tissue| esophagus| eye| heart| intestine| kidney| liver| lung| lymph| lymph node| mammary gland| mouth| muscle| nerve| ovary| pancreas| parathyroid| pharynx| pituitary gland| placenta| prostate| skin| spleen| stomach| testis| thymus| thyroid| trachea| uterus| vascular| breast (mammary gland) tumor| chondro…	chr11	+	121322912	121504471	NM_003105	Q92673	GO:0000042 // GO:0006605 // GO:0006605 // GO:0006622 // GO:0006869 // GO:0006892 // GO:0006898 // GO:0007165 // GO:0008203 // GO:0008219 // GO:0008283 // GO:0014910 // GO:0016477 // GO:0032091 // GO:0032460 // GO:0043407 // GO:0045053 // GO:0045732 // GO:0050768 // GO:0051604 // GO:0070863 // GO:1901215 // GO:1902430 // GO:1902430 // GO:1902771 // GO:1902948 // GO:1902953 // GO:1902955 // GO:1902…	protein targeting to Golgi // protein targeting // protein targeting // protein targeting to lysosome // lipid transport // post-Golgi vesicle-mediated transport // receptor-mediated endocytosis // signal transduction // cholesterol metabolic process // cell death // cell proliferation // regulation of smooth muscle cell migration // cell migration // negative regulation of protein binding // neg…	inferred from direct assay // inferred from direct assay // inferred from mutant phenotype // inferred from direct assay // inferred from electronic annotation // inferred from direct assay // traceable author statement // traceable author statement // inferred from electronic annotation // inferred from electronic annotation // inferred from electronic annotation // inferred from direct assay //…	GO:0005615 // GO:0005641 // GO:0005768 // GO:0005769 // GO:0005769 // GO:0005771 // GO:0005783 // GO:0005794 // GO:0005802 // GO:0005887 // GO:0016020 // GO:0031985 // GO:0034362 // GO:0043025 // GO:0055037 // GO:0070062 // GO:0005576 // GO:0005768 // GO:0005794 // GO:0016020 // GO:0016021	extracellular space // nuclear envelope lumen // endosome // early endosome // early endosome // multivesicular body // endoplasmic reticulum // Golgi apparatus // trans-Golgi network // integral component of plasma membrane // membrane // Golgi cisterna // low-density lipoprotein particle // neuronal cell body // recycling endosome // extracellular vesicular exosome // extracellular region // en…	inferred from direct assay // inferred from direct assay // inferred from direct assay // inferred from direct assay // inferred from mutant phenotype // inferred from electronic annotation // inferred from direct assay // inferred from direct assay // inferred from direct assay // traceable author statement // inferred from direct assay // inferred from direct assay // inferred from electronic a…	GO:0001540 // GO:0001540 // GO:0004888 // GO:0005515 // GO:0030169 // GO:0030306	beta-amyloid binding // beta-amyloid binding // transmembrane signaling receptor activity // protein binding // low-density lipoprotein particle binding // ADP-ribosylation factor binding	inferred from direct assay // inferred from physical interaction // traceable author statement // inferred from physical interaction // inferred from physical interaction // inferred from physical interaction	---	---	---	---	---	16732584	53	1	main
17024980	5.88698	6.7157	6.95802	6.05422		6.30134	6.50612		NM_001142522	FBXO5	F-box protein 5	6q25.2	NM_001142522	RefSeq	Homo sapiens F-box protein 5 (FBXO5), transcript variant 2, mRNA.	68	68	17	25	TRUE	Hs.520506	blood| bone marrow| brain| cervix| connective tissue| embryonic tissue| esophagus| eye| intestine| kidney| liver| lung| lymph| lymph node| mammary gland| muscle| nerve| ovary| pancreas| pharynx| placenta| prostate| skin| stomach| testis| thymus| tonsil| uterus| vascular| breast (mammary gland) tumor| cervical tumor| colorectal tumor| esophageal tumor| gastrointestinal tumor| germ cell tumor| glio…	chr6	-	153291658	153304740	NM_001142522	Q9UKT4	GO:0000082 // GO:0000083 // GO:0000278 // GO:0001556 // GO:0007057 // GO:0007091 // GO:0007346 // GO:0016050 // GO:0031145 // GO:0045835 // GO:0046785 // GO:0051436 // GO:0051437 // GO:0051439 // GO:0060565 // GO:0007049 // GO:0007067 // GO:0007346 // GO:0040020 // GO:0051225 // GO:0051301	G1/S transition of mitotic cell cycle // regulation of transcription involved in G1/S transition of mitotic cell cycle // mitotic cell cycle // oocyte maturation // spindle assembly involved in female meiosis I // metaphase/anaphase transition of mitotic cell cycle // regulation of mitotic cell cycle // vesicle organization // anaphase-promoting complex-dependent proteasomal ubiquitin-dependent p…	traceable author statement // traceable author statement // traceable author statement // inferred from electronic annotation // inferred from electronic annotation // traceable author statement // inferred from sequence or structural similarity // inferred from electronic annotation // traceable author statement // inferred from electronic annotation // inferred from electronic annotation // inf…	GO:0005634 // GO:0005654 // GO:0005730 // GO:0005737 // GO:0005819 // GO:0005829 // GO:0005634 // GO:0005737 // GO:0005819 // GO:0005856	nucleus // nucleoplasm // nucleolus // cytoplasm // spindle // cytosol // nucleus // cytoplasm // spindle // cytoskeleton	inferred from direct assay // traceable author statement // inferred from direct assay // inferred from direct assay // inferred from direct assay // traceable author statement // inferred from electronic annotation // inferred from electronic annotation // inferred from electronic annotation // inferred from electronic annotation	GO:0005515 // GO:0019901 // GO:0046872	protein binding // protein kinase binding // metal ion binding	inferred from physical interaction // inferred from physical interaction // inferred from electronic annotation	---	---	---	---	---	17024980	25	1	main
16766318	6.94889	7.80228	7.71103	7.09729		7.37559	7.40416		NM_000946	PRIM1	primase, DNA, polypeptide 1 (49kDa)	12q13	NM_000946	RefSeq	Homo sapiens primase, DNA, polypeptide 1 (49kDa) (PRIM1), mRNA.	100	78	21	21	FALSE	Hs.534339	ascites| bladder| blood| bone| bone marrow| brain| cervix| embryonic tissue| eye| heart| intestine| kidney| larynx| liver| lung| lymph| lymph node| mammary gland| mouth| pancreas| pharynx| placenta| prostate| salivary gland| skin| stomach| testis| thymus| tonsil| uterus| bladder carcinoma| breast (mammary gland) tumor| cervical tumor| chondrosarcoma| colorectal tumor| gastrointestinal tumor| germ…	chr12	-	57125046	57146157	NM_000946	P49642	GO:0000082 // GO:0000278 // GO:0000722 // GO:0000723 // GO:0006269 // GO:0006270 // GO:0006271 // GO:0032201 // GO:0006260 // GO:0006269	G1/S transition of mitotic cell cycle // mitotic cell cycle // telomere maintenance via recombination // telomere maintenance // DNA replication, synthesis of RNA primer // DNA replication initiation // DNA strand elongation involved in DNA replication // telomere maintenance via semi-conservative replication // DNA replication // DNA replication, synthesis of RNA primer	traceable author statement // traceable author statement // traceable author statement // traceable author statement // inferred from electronic annotation // traceable author statement // traceable author statement // traceable author statement // inferred from electronic annotation // traceable author statement	GO:0005654 // GO:1990077 // GO:0016020	nucleoplasm // primosome complex // membrane	traceable author statement // inferred from electronic annotation // inferred from direct assay	GO:0003896 // GO:0046872 // GO:0003896 // GO:0003899 // GO:0016740 // GO:0016779	DNA primase activity // metal ion binding // DNA primase activity // DNA-directed RNA polymerase activity // transferase activity // nucleotidyltransferase activity	inferred from electronic annotation // inferred from electronic annotation // traceable author statement // inferred from electronic annotation // inferred from electronic annotation // inferred from electronic annotation	GenMAPP // GenMAPP	DNA_replication_Reactome // G1_to_S_cell_cycle_Reactome	---	---	---	16766318	27	1	main
16695437	6.82308	6.46052	3.41226	3.22596		6.6418	3.31911		NM_001256030	CD48	CD48 molecule	1q21.3-q22	NM_001256030	RefSeq	Homo sapiens CD48 molecule (CD48), transcript variant 2, mRNA.	100	48	10	10	FALSE	Hs.243564	blood| bone marrow| brain| connective tissue| eye| kidney| lung| lymph| lymph node| mammary gland| muscle| nerve| pancreas| pharynx| placenta| prostate| skin| spleen| stomach| testis| thymus| tonsil| uterus| vascular| breast (mammary gland) tumor| chondrosarcoma| gastrointestinal tumor| germ cell tumor| glioma| leukemia| lymphoma| non-neoplasia| normal| pancreatic tumor| skin tumor| soft tissue/m…	chr1	-	160648536	160681641	NM_001256030	P09326	GO:0006952 // GO:0007165 // GO:0007596 // GO:0042110 // GO:0045576 // GO:0050900	defense response // signal transduction // blood coagulation // T cell activation // mast cell activation // leukocyte migration	traceable author statement // inferred from electronic annotation // traceable author statement // inferred from electronic annotation // inferred from electronic annotation // traceable author statement	GO:0005886 // GO:0005887 // GO:0009897 // GO:0043234 // GO:0045121 // GO:0046658 // GO:0070062 // GO:0005886 // GO:0016020 // GO:0016020 // GO:0016021 // GO:0031225	plasma membrane // integral component of plasma membrane // external side of plasma membrane // protein complex // membrane raft // anchored component of plasma membrane // extracellular vesicular exosome // plasma membrane // membrane // membrane // integral component of membrane // anchored component of membrane	traceable author statement // traceable author statement // inferred from electronic annotation // inferred from electronic annotation // inferred from direct assay // inferred from electronic annotation // inferred from direct assay // inferred from electronic annotation // inferred from direct assay // inferred from electronic annotation // inferred from electronic annotation // inferred from e…	GO:0003823 // GO:0004872 // GO:0005515	antigen binding // receptor activity // protein binding	inferred from electronic annotation // inferred from electronic annotation // inferred from physical interaction	---	---	---	---	---	16695437	21	1	main
17060921	4.50787	6.27393	2.45731	2.41935		5.3909	2.43833		ENST00000384723	RNU6-1104P	RNA, U6 small nuclear 1104, pseudogene	---	ENST00000384723	ENSEMBL	ncrna:known chromosome:GRCh38:7:101269938:101270041:-1 gene:ENSG00000207454 gene_biotype:snRNA transcript_biotype:snRNA	100	100	11	11	TRUE	---	---	chr7	-	100913219	100913322	---	---	---	---	---	---	---	---	---	---	---	---	---	---	---	---	17060921	11	3	main
16669437	10.261	11.3988	11.7782	11.0409		10.8299	11.4095		NR_027337	HIST2H2BA	histone cluster 2, H2ba (pseudogene)	1p11.2	NR_027337	RefSeq	Homo sapiens histone cluster 2, H2ba (pseudogene) (HIST2H2BA), non-coding RNA.	100	92	11	11	FALSE	Hs.742189	adrenal gland| brain| lung| skin| uterus| glioma| normal| skin tumor| adult	chr1	+	120906028	120915073	---	---	---	---	---	---	---	---	---	---	---	---	---	---	---	---	16669437	12	3	main
16904551	8.77165	9.58448	6.14513	6.56682		9.17807	6.35598		ENST00000392701	GALNT3	polypeptide N-acetylgalactosaminyltransferase 3	2q24-q31	ENST00000392701	ENSEMBL	ensembl_havana_transcript:known chromosome:GRCh38:2:165747591:165794682:-1 gene:ENSG00000115339 gene_biotype:protein_coding transcript_biotype:protein_coding	76	76	26	34	TRUE	Hs.170986 // Hs.707375 // Hs.709093	ascites| bladder| bone marrow| brain| embryonic tissue| esophagus| eye| intestine| kidney| larynx| liver| lung| lymph node| mammary gland| mouth| muscle| ovary| pancreas| parathyroid| pharynx| placenta| prostate| salivary gland| skin| stomach| testis| thymus| trachea| uterus| bladder carcinoma| breast (mammary gland) tumor| colorectal tumor| esophageal tumor| gastrointestinal tumor| germ cell tum…	chr2	-	166604101	166651192	ENST00000392701	Q14435	GO:0005975 // GO:0016266 // GO:0018242 // GO:0018243 // GO:0043687 // GO:0044267 // GO:0006486 // GO:0008152	carbohydrate metabolic process // O-glycan processing // protein O-linked glycosylation via serine // protein O-linked glycosylation via threonine // post-translational protein modification // cellular protein metabolic process // protein glycosylation // metabolic process	non-traceable author statement // traceable author statement // inferred from direct assay // inferred from direct assay // traceable author statement // traceable author statement // inferred from electronic annotation // inferred from electronic annotation	GO:0000139 // GO:0005794 // GO:0016020 // GO:0016021 // GO:0032580 // GO:0048471 // GO:0005634 // GO:0005737 // GO:0005794 // GO:0016020 // GO:0016021	Golgi membrane // Golgi apparatus // membrane // integral component of membrane // Golgi cisterna membrane // perinuclear region of cytoplasm // nucleus // cytoplasm // Golgi apparatus // membrane // integral component of membrane	traceable author statement // inferred from direct assay // traceable author statement // inferred from electronic annotation // inferred from electronic annotation // inferred from direct assay // inferred from direct assay // inferred from direct assay // inferred from electronic annotation // inferred from electronic annotation // traceable author statement	GO:0004653 // GO:0005509 // GO:0030145 // GO:0016757 // GO:0004653 // GO:0004653 // GO:0016740 // GO:0046872	polypeptide N-acetylgalactosaminyltransferase activity // calcium ion binding // manganese ion binding // transferase activity, transferring glycosyl groups // polypeptide N-acetylgalactosaminyltransferase activity // polypeptide N-acetylgalactosaminyltransferase activity // transferase activity // metal ion binding	inferred from direct assay // inferred from direct assay // inferred from direct assay // inferred from electronic annotation // inferred from electronic annotation // traceable author statement // inferred from electronic annotation // inferred from electronic annotation	---	---	Pfam // Pfam	IPR000772 // IPR001173	Ricin B lectin domain // Glycosyltransferase 2-like	16904551	34	1	main
16758336	8.25945	8.98996	8.53294	7.69915		8.62471	8.11605		NM_014708	KNTC1	kinetochore associated 1	12q24.31	NM_014708	RefSeq	Homo sapiens kinetochore associated 1 (KNTC1), mRNA.	100	85	57	57	FALSE	Hs.300559	ascites| bladder| blood| bone| brain| cervix| connective tissue| embryonic tissue| eye| heart| intestine| kidney| liver| lung| lymph node| muscle| pancreas| pharynx| pituitary gland| placenta| prostate| skin| stomach| testis| thymus| thyroid| trachea| uterus| cervical tumor| chondrosarcoma| colorectal tumor| gastrointestinal tumor| germ cell tumor| head and neck tumor| kidney tumor| leukemia| liv…	chr12	+	123011793	123110947	NM_014708	P50748	GO:0000278 // GO:0006461 // GO:0007067 // GO:0007093 // GO:0007096 // GO:0007049 // GO:0051301	mitotic cell cycle // protein complex assembly // mitotic nuclear division // mitotic cell cycle checkpoint // regulation of exit from mitosis // cell cycle // cell division	traceable author statement // non-traceable author statement // inferred from electronic annotation // inferred from direct assay // non-traceable author statement // inferred from electronic annotation // inferred from electronic annotation	GO:0000777 // GO:0000922 // GO:0005634 // GO:0005737 // GO:0005828 // GO:0005829 // GO:0005886 // GO:0015629 // GO:0000775 // GO:0000776 // GO:0005634 // GO:0005694 // GO:0005737 // GO:0005819 // GO:0005856	condensed chromosome kinetochore // spindle pole // nucleus // cytoplasm // kinetochore microtubule // cytosol // plasma membrane // actin cytoskeleton // chromosome, centromeric region // kinetochore // nucleus // chromosome // cytoplasm // spindle // cytoskeleton	inferred from electronic annotation // inferred from direct assay // non-traceable author statement // inferred from direct assay // inferred from direct assay // traceable author statement // inferred from direct assay // inferred from direct assay // inferred from electronic annotation // inferred from electronic annotation // inferred from electronic annotation // inferred from electronic anno…	GO:0005515	protein binding	inferred from physical interaction	---	---	---	---	---	16758336	67	1	main
17121912	5.0632	5.91238	5.20255	4.25109		5.48779	4.72682		NR_024391	LINC00669	long intergenic non-protein coding RNA 669	18q12.2-q12.3	NR_024391	RefSeq	Homo sapiens long intergenic non-protein coding RNA 669 (LINC00669), long non-coding RNA.	100	100	25	25	TRUE	Hs.649350	bone marrow| brain| connective tissue| intestine| mammary gland| skin| testis| colorectal tumor| glioma| normal| primitive neuroectodermal tumor of the CNS| skin tumor| soft tissue/muscle tissue tumor| fetus| infant| adult	chrU	+	1	1928	---	---	---	---	---	---	---	---	---	---	---	---	---	---	---	---	17121912	25	3	rescue
16967631	6.58957	6.22709	5.48502	5.27099		6.40833	5.37801		NM_001098484	SLC4A4	solute carrier family 4 (sodium bicarbonate cotransporter), member 4	4q21	NM_001098484	RefSeq	Homo sapiens solute carrier family 4 (sodium bicarbonate cotransporter), member 4 (SLC4A4), transcript variant 1, mRNA.	93	93	26	28	TRUE	Hs.5462	bladder| bone marrow| brain| connective tissue| eye| heart| intestine| kidney| liver| lung| muscle| nerve| ovary| pancreas| prostate| skin| spleen| stomach| thyroid| trachea| vascular| chondrosarcoma| colorectal tumor| gastrointestinal tumor| germ cell tumor| glioma| head and neck tumor| kidney tumor| leukemia| non-neoplasia| normal| ovarian tumor| pancreatic tumor| prostate cancer| fetus| infant…	chr4	+	72053003	72437804	NM_001098484	Q9Y6R1	GO:0006810 // GO:0006811 // GO:0015701 // GO:0035725 // GO:0055085 // GO:0006810 // GO:0006811 // GO:0006814 // GO:0006820 // GO:0015701	transport // ion transport // bicarbonate transport // sodium ion transmembrane transport // transmembrane transport // transport // ion transport // sodium ion transport // anion transport // bicarbonate transport	traceable author statement // traceable author statement // traceable author statement // traceable author statement // traceable author statement // inferred from electronic annotation // inferred from electronic annotation // inferred from electronic annotation // inferred from electronic annotation // inferred from electronic annotation	GO:0005886 // GO:0005887 // GO:0016323 // GO:0070062 // GO:0005886 // GO:0016020 // GO:0016021	plasma membrane // integral component of plasma membrane // basolateral plasma membrane // extracellular vesicular exosome // plasma membrane // membrane // integral component of membrane	traceable author statement // traceable author statement // inferred from electronic annotation // inferred from direct assay // inferred from electronic annotation // inferred from electronic annotation // inferred from electronic annotation	GO:0005452 // GO:0005515 // GO:0008510 // GO:0005215 // GO:0008509 // GO:0015293	inorganic anion exchanger activity // protein binding // sodium:bicarbonate symporter activity // transporter activity // anion transmembrane transporter activity // symporter activity	inferred from electronic annotation // inferred from physical interaction // traceable author statement // inferred from electronic annotation // inferred from electronic annotation // inferred from electronic annotation	---	---	---	---	---	16967631	28	1	main
16669630	7.1441	8.24339	5.07272	4.86962		7.69375	4.97117		ENST00000364829	RNU1-59P	RNA, U1 small nuclear 59, pseudogene	---	ENST00000364829	ENSEMBL	ncrna:known chromosome:GRCh38:1:149162783:149162944:-1 gene:ENSG00000201699 gene_biotype:snRNA transcript_biotype:snRNA	50	100	4	8	FALSE	---	---	chr1	+	144534038	144534199	---	---	---	---	---	---	---	---	---	---	---	---	---	---	---	---	16669630	8	3	main
16804631	7.31386	8.55289	8.44234	7.28285		7.93338	7.8626		NM_152259	TICRR	TOPBP1-interacting checkpoint and replication regulator	15q26.1	NM_152259	RefSeq	Homo sapiens TOPBP1-interacting checkpoint and replication regulator (TICRR), mRNA.	90	90	18	20	TRUE	Hs.441708	ascites| blood| bone| brain| cervix| embryonic tissue| eye| heart| intestine| larynx| liver| lung| lymph node| mammary gland| mouth| muscle| ovary| salivary gland| testis| thymus| uterus| bladder carcinoma| breast (mammary gland) tumor| cervical tumor| chondrosarcoma| colorectal tumor| gastrointestinal tumor| germ cell tumor| head and neck tumor| leukemia| lung tumor| normal| ovarian tumor| retin…	chr15	+	90118713	90174287	NM_152259	Q7Z2Z1	GO:0000075 // GO:0001731 // GO:0006260 // GO:0006281 // GO:0010212 // GO:0030174 // GO:0033314 // GO:0006260 // GO:0006281 // GO:0006974 // GO:0007049 // GO:0010212 // GO:0033314	cell cycle checkpoint // formation of translation preinitiation complex // DNA replication // DNA repair // response to ionizing radiation // regulation of DNA-dependent DNA replication initiation // mitotic DNA replication checkpoint // DNA replication // DNA repair // cellular response to DNA damage stimulus // cell cycle // response to ionizing radiation // mitotic DNA replication checkpoint	inferred from sequence or structural similarity // inferred from sequence or structural similarity // inferred from sequence or structural similarity // inferred from sequence or structural similarity // inferred from sequence or structural similarity // inferred from mutant phenotype // inferred from sequence or structural similarity // inferred from electronic annotation // inferred from electr…	GO:0005634 // GO:0005730 // GO:0005634	nucleus // nucleolus // nucleus	inferred from direct assay // inferred from direct assay // inferred from electronic annotation	GO:0003682 // GO:0005515	chromatin binding // protein binding	inferred from direct assay // inferred from physical interaction	---	---	---	---	---	16804631	20	1	main
16929573	8.20105	9.29984	9.68973	8.6069		8.75045	9.14831		ENST00000216122	MCM5	minichromosome maintenance complex component 5	22q13.1	ENST00000216122	ENSEMBL	ensembl_havana_transcript:known chromosome:GRCh38:22:35400063:35425430:1 gene:ENSG00000100297 gene_biotype:protein_coding transcript_biotype:protein_coding	76	76	19	25	TRUE	Hs.517582 // Hs.607034 // Hs.659728	adrenal gland| ascites| bladder| blood| bone| bone marrow| brain| cervix| connective tissue| embryonic tissue| esophagus| eye| heart| intestine| kidney| liver| lung| lymph| lymph node| mammary gland| mouth| muscle| ovary| pancreas| pharynx| pituitary gland| placenta| prostate| salivary gland| skin| spleen| stomach| testis| thymus| thyroid| tonsil| trachea| uterus| vascular|adrenal tumor| breast (…	chr22	+	35796056	35820495	ENST00000216122	P33992	GO:0000082 // GO:0000278 // GO:0006260 // GO:0006270 // GO:0006271 // GO:0032508 // GO:0006260 // GO:0007049 // GO:0051301	G1/S transition of mitotic cell cycle // mitotic cell cycle // DNA replication // DNA replication initiation // DNA strand elongation involved in DNA replication // DNA duplex unwinding // DNA replication // cell cycle // cell division	traceable author statement // traceable author statement // traceable author statement // inferred from electronic annotation // traceable author statement // inferred from electronic annotation // inferred from electronic annotation // inferred from electronic annotation // inferred from electronic annotation	GO:0005634 // GO:0005654 // GO:0005730 // GO:0042555 // GO:0005634 // GO:0005634 // GO:0016020 // GO:0042555	nucleus // nucleoplasm // nucleolus // MCM complex // nucleus // nucleus // membrane // MCM complex	inferred from direct assay // traceable author statement // inferred from direct assay // inferred from direct assay // traceable author statement // inferred from electronic annotation // inferred from direct assay // inferred from electronic annotation	GO:0003677 // GO:0003678 // GO:0005515 // GO:0005524 // GO:0000166 // GO:0004386 // GO:0016787	DNA binding // DNA helicase activity // protein binding // ATP binding // nucleotide binding // helicase activity // hydrolase activity	inferred from electronic annotation // inferred from electronic annotation // inferred from physical interaction // inferred from electronic annotation // inferred from electronic annotation // inferred from electronic annotation // inferred from electronic annotation	GenMAPP // GenMAPP // GenMAPP	Cell_cycle_KEGG // DNA_replication_Reactome // G1_to_S_cell_cycle_Reactome	Pfam	IPR001208	Mini-chromosome maintenance, DNA-dependent ATPase	16929573	25	1	main
16912379	10.2347	10.7859	10.7106	9.72814		10.5103	10.2194		NM_012112	TPX2	TPX2, microtubule-associated	20q11.2	NM_012112	RefSeq	Homo sapiens TPX2, microtubule-associated (TPX2), mRNA.	100	100	30	30	TRUE	Hs.244580	adrenal gland| ascites| bladder| blood| bone| bone marrow| brain| cervix| connective tissue| ear| embryonic tissue| esophagus| eye| heart| intestine| kidney| larynx| liver| lung| lymph| lymph node| mammary gland| mouth| muscle| nerve| ovary| pancreas| pharynx| placenta| prostate| salivary gland| skin| spleen| stomach| testis| thymus| thyroid| tonsil| trachea| uterus| vascular|adrenal tumor| bladd…	chr20	+	30326904	30389608	NM_012112	Q9ULW0	GO:0006915 // GO:0007067 // GO:0008283 // GO:0032147 // GO:0060236 // GO:0007049 // GO:0007067 // GO:0051301 // GO:0060236	apoptotic process // mitotic nuclear division // cell proliferation // activation of protein kinase activity // regulation of mitotic spindle organization // cell cycle // mitotic nuclear division // cell division // regulation of mitotic spindle organization	inferred from electronic annotation // inferred from electronic annotation // traceable author statement // inferred from direct assay // inferred from sequence or structural similarity // inferred from electronic annotation // traceable author statement // inferred from electronic annotation // inferred from electronic annotation	GO:0000922 // GO:0005634 // GO:0005730 // GO:0005737 // GO:0005819 // GO:0005874 // GO:0015630 // GO:0000922 // GO:0005634 // GO:0005634 // GO:0005819 // GO:0005819 // GO:0005856	spindle pole // nucleus // nucleolus // cytoplasm // spindle // microtubule // microtubule cytoskeleton // spindle pole // nucleus // nucleus // spindle // spindle // cytoskeleton	inferred from direct assay // inferred from direct assay // inferred from direct assay // inferred from electronic annotation // inferred from sequence or structural similarity // inferred from electronic annotation // inferred from direct assay // inferred from electronic annotation // inferred from electronic annotation // traceable author statement // inferred from electronic annotation // tra…	GO:0005515 // GO:0005524 // GO:0005525 // GO:0019901 // GO:0019901	protein binding // ATP binding // GTP binding // protein kinase binding // protein kinase binding	inferred from physical interaction // traceable author statement // traceable author statement // inferred from physical interaction // inferred from electronic annotation	---	---	---	---	---	16912379	30	1	main
16673154	6.48904	7.19107	7.43682	6.5611		6.84005	6.99896		NM_031423	NUF2	NUF2, NDC80 kinetochore complex component	1q23.3	NM_031423	RefSeq	Homo sapiens NUF2, NDC80 kinetochore complex component (NUF2), transcript variant 2, mRNA.	100	58	11	11	FALSE	Hs.651950	blood| bone| bone marrow| brain| connective tissue| ear| embryonic tissue| eye| intestine| kidney| liver| lung| lymph| lymph node| mammary gland| muscle| ovary| pancreas| placenta| prostate| salivary gland| skin| stomach| testis| thymus| uterus| vascular| bladder carcinoma| breast (mammary gland) tumor| chondrosarcoma| colorectal tumor| gastrointestinal tumor| germ cell tumor| kidney tumor| leuke…	chr1	+	163236366	163325554	NM_031423	Q9BZD4	GO:0000278 // GO:0007059 // GO:0007067 // GO:0007049 // GO:0051301	mitotic cell cycle // chromosome segregation // mitotic nuclear division // cell cycle // cell division	traceable author statement // non-traceable author statement // inferred from electronic annotation // inferred from electronic annotation // inferred from electronic annotation	GO:0000775 // GO:0000777 // GO:0005634 // GO:0005829 // GO:0031262 // GO:0000775 // GO:0000776 // GO:0005694 // GO:0016020	chromosome, centromeric region // condensed chromosome kinetochore // nucleus // cytosol // Ndc80 complex // chromosome, centromeric region // kinetochore // chromosome // membrane	non-traceable author statement // inferred from electronic annotation // inferred from electronic annotation // traceable author statement // inferred from direct assay // inferred from electronic annotation // inferred from electronic annotation // inferred from electronic annotation // inferred from direct assay	GO:0005515 // GO:0003674	protein binding // molecular_function	inferred from physical interaction // no biological data available	---	---	---	---	---	16673154	19	1	main
16962022	7.1656	8.53784	5.93579	6.20437		7.85172	6.07008		NM_014398	LAMP3	lysosomal-associated membrane protein 3	3q26.3-q27	NM_014398	RefSeq	Homo sapiens lysosomal-associated membrane protein 3 (LAMP3), mRNA.	77	77	23	30	TRUE	Hs.518448	bladder| blood| brain| connective tissue| embryonic tissue| esophagus| kidney| larynx| liver| lung| lymph node| mammary gland| mouth| pharynx| placenta| salivary gland| spleen| stomach| testis| thymus| trachea| vascular| breast (mammary gland) tumor| chondrosarcoma| esophageal tumor| gastrointestinal tumor| germ cell tumor| head and neck tumor| kidney tumor| non-neoplasia| normal| soft tissue/mus…	chr3	-	182840001	182881627	NM_014398	Q9UQV4	GO:0002376 // GO:0008283	immune system process // cell proliferation	inferred from electronic annotation // traceable author statement	GO:0005765 // GO:0016021 // GO:0097233 // GO:0005764 // GO:0005765 // GO:0016020 // GO:0030659 // GO:0031410	lysosomal membrane // integral component of membrane // alveolar lamellar body membrane // lysosome // lysosomal membrane // membrane // cytoplasmic vesicle membrane // cytoplasmic vesicle	inferred from electronic annotation // inferred from electronic annotation // inferred from electronic annotation // inferred from electronic annotation // traceable author statement // inferred from electronic annotation // inferred from electronic annotation // inferred from electronic annotation	---	---	---	---	---	---	---	---	16962022	30	1	main
17070492	6.66924	7.45075	4.70462	5.72171		7.05999	5.21316		ENST00000285393	ATP6V0D2	ATPase, H+ transporting, lysosomal 38kDa, V0 subunit d2	---	ENST00000285393	ENSEMBL	ensembl_havana_transcript:known chromosome:GRCh38:8:86098837:86154228:1 gene:ENSG00000147614 gene_biotype:protein_coding transcript_biotype:protein_coding	81	81	21	26	TRUE	Hs.436360 // Hs.583941 // Hs.709047	blood| embryonic tissue| kidney| lung| skin| spleen| kidney tumor| normal| skin tumor|embryoid body| fetus| neonate| adult // ovary| ovarian tumor // adult	chr8	+	86999552	87166457	ENST00000285393	Q8N8Y2	GO:0006879 // GO:0008286 // GO:0015991 // GO:0033572 // GO:0051701 // GO:0055085 // GO:0090382 // GO:0006810 // GO:0006811 // GO:0015992	cellular iron ion homeostasis // insulin receptor signaling pathway // ATP hydrolysis coupled proton transport // transferrin transport // interaction with host // transmembrane transport // phagosome maturation // transport // ion transport // proton transport	traceable author statement // traceable author statement // inferred from electronic annotation // traceable author statement // traceable author statement // traceable author statement // traceable author statement // inferred from electronic annotation // inferred from electronic annotation // inferred from electronic annotation	GO:0005769 // GO:0010008 // GO:0016020 // GO:0016324 // GO:0016471 // GO:0030670 // GO:0033179 // GO:0070062 // GO:0005768	early endosome // endosome membrane // membrane // apical plasma membrane // vacuolar proton-transporting V-type ATPase complex // phagocytic vesicle membrane // proton-transporting V-type ATPase, V0 domain // extracellular vesicular exosome // endosome	inferred from electronic annotation // traceable author statement // inferred from direct assay // inferred from direct assay // inferred from direct assay // traceable author statement // inferred from electronic annotation // inferred from direct assay // inferred from electronic annotation	GO:0005515 // GO:0015078	protein binding // hydrogen ion transmembrane transporter activity	inferred from physical interaction // inferred from electronic annotation	---	---	Pfam	IPR002843	ATPase, V0 complex, c/d subunit	17070492	26	1	main
16904576	8.48264	10.0569	7.03659	7.33541		9.26975	7.186		OTTHUMT00000333594	AC009495.3	putative novel transcript	---	OTTHUMT00000333594	Havana transcript	cdna:all chromosome:VEGA56:2:165833048:165839098:-1 Gene:OTTHUMG00000154037	100	100	19	19	TRUE	---	---	chr2	-	166689558	166695608	---	---	---	---	---	---	---	---	---	---	---	---	---	---	---	---	16904576	19	1	main
16801557	7.11437	7.80574	8.11322	7.05954		7.46005	7.58638		NM_004701	CCNB2	cyclin B2	15q22.2	NM_004701	RefSeq	Homo sapiens cyclin B2 (CCNB2), mRNA.	79	79	22	28	TRUE	Hs.194698	adrenal gland| ascites| bladder| blood| bone| bone marrow| brain| cervix| connective tissue| embryonic tissue| esophagus| eye| heart| intestine| kidney| liver| lung| lymph| lymph node| mammary gland| muscle| ovary| pancreas| pharynx| placenta| prostate| skin| stomach| testis| thymus| thyroid| tonsil| uterus| vascular|adrenal tumor| bladder carcinoma| breast (mammary gland) tumor| cervical tumor| …	chr15	+	59397277	59417244	NM_004701	O95067	GO:0000079 // GO:0000086 // GO:0000278 // GO:0001701 // GO:0007067 // GO:0007077 // GO:0040007 // GO:0043029 // GO:0048538 // GO:0051726 // GO:0007049 // GO:0051301 // GO:0051726	regulation of cyclin-dependent protein serine/threonine kinase activity // G2/M transition of mitotic cell cycle // mitotic cell cycle // in utero embryonic development // mitotic nuclear division // mitotic nuclear envelope disassembly // growth // T cell homeostasis // thymus development // regulation of cell cycle // cell cycle // cell division // regulation of cell cycle	inferred from electronic annotation // traceable author statement // traceable author statement // inferred from electronic annotation // inferred from electronic annotation // traceable author statement // inferred from electronic annotation // inferred from electronic annotation // inferred from electronic annotation // traceable author statement // inferred from electronic annotation // inferr…	GO:0005654 // GO:0005813 // GO:0005829 // GO:0015630 // GO:0016020 // GO:0005634	nucleoplasm // centrosome // cytosol // microtubule cytoskeleton // membrane // nucleus	traceable author statement // inferred from direct assay // traceable author statement // inferred from direct assay // inferred from electronic annotation // inferred from electronic annotation	GO:0005515 // GO:0019901	protein binding // protein kinase binding	inferred from physical interaction // inferred from electronic annotation	GenMAPP	Cell_cycle_KEGG	---	---	---	16801557	28	1	main
16943944	7.79792	8.07183	8.04015	8.02268		7.93488	8.03142		NM_001004196	CD200	CD200 molecule	3q13.2	NM_001004196	RefSeq	Homo sapiens CD200 molecule (CD200), transcript variant 2, mRNA.	100	100	16	16	TRUE	Hs.79015	adipose tissue| bladder| blood| bone marrow| brain| connective tissue| ear| embryonic tissue| eye| heart| intestine| kidney| liver| lung| lymph node| ovary| pancreas| pharynx| pituitary gland| placenta| prostate| skin| spleen| stomach| testis| thymus| thyroid| trachea| umbilical cord| uterus| vascular| bladder carcinoma| chondrosarcoma| colorectal tumor| gastrointestinal tumor| germ cell tumor| g…	chr3	+	112051915	112082056	NM_001004196	P41217	GO:0050776	regulation of immune response	traceable author statement	GO:0005886 // GO:0005887 // GO:0005886 // GO:0016020 // GO:0016021	plasma membrane // integral component of plasma membrane // plasma membrane // membrane // integral component of membrane	traceable author statement // traceable author statement // inferred from electronic annotation // inferred from electronic annotation // inferred from electronic annotation	GO:0005515	protein binding	inferred from physical interaction	---	---	---	---	---	16943944	16	1	main
16747014	6.13516	7.01051	6.62333	5.85094		6.57283	6.23713		NM_001130862	RAD51AP1	RAD51 associated protein 1	12p13.2-p13.1	NM_001130862	RefSeq	Homo sapiens RAD51 associated protein 1 (RAD51AP1), transcript variant 1, mRNA.	100	79	22	22	FALSE	Hs.730696	ascites| bladder| blood| bone marrow| brain| cervix| connective tissue| embryonic tissue| esophagus| eye| heart| intestine| kidney| liver| lung| lymph| lymph node| mammary gland| mouth| pancreas| pharynx| placenta| prostate| salivary gland| skin| stomach| testis| thymus| uterus| vascular| bladder carcinoma| breast (mammary gland) tumor| cervical tumor| colorectal tumor| esophageal tumor| gastroin…	chr12	+	4647950	4669214	NM_001130862	Q96B01	GO:0000724 // GO:0006281 // GO:0010569 // GO:0071479 // GO:0006281 // GO:0006281 // GO:0006310 // GO:0006974	double-strand break repair via homologous recombination // DNA repair // regulation of double-strand break repair via homologous recombination // cellular response to ionizing radiation // DNA repair // DNA repair // DNA recombination // cellular response to DNA damage stimulus	non-traceable author statement // non-traceable author statement // inferred from direct assay // inferred from direct assay // inferred from electronic annotation // traceable author statement // inferred from electronic annotation // inferred from electronic annotation	GO:0005634 // GO:0005634 // GO:0005634	nucleus // nucleus // nucleus	inferred by curator // inferred from electronic annotation // traceable author statement	GO:0003690 // GO:0003697 // GO:0003723 // GO:0005515 // GO:0003677 // GO:0003690 // GO:0003690 // GO:0003697 // GO:0003697 // GO:0003723 // GO:0003723	double-stranded DNA binding // single-stranded DNA binding // RNA binding // protein binding // DNA binding // double-stranded DNA binding // double-stranded DNA binding // single-stranded DNA binding // single-stranded DNA binding // RNA binding // RNA binding	inferred from direct assay // inferred from direct assay // inferred from direct assay // inferred from physical interaction // inferred from electronic annotation // inferred from electronic annotation // traceable author statement // inferred from electronic annotation // traceable author statement // inferred from electronic annotation // traceable author statement	---	---	---	---	---	16747014	28	1	main
17113710	10.5281	11.444	9.42042	9.99555		10.986	9.70799		NM_017938	TMEM255A	transmembrane protein 255A	Xq24	NM_017938	RefSeq	Homo sapiens transmembrane protein 255A (TMEM255A), transcript variant 1, mRNA.	82	82	18	22	TRUE	Hs.437563	blood| brain| connective tissue| eye| kidney| liver| nerve| placenta| skin| spleen| testis| thymus| trachea| germ cell tumor| glioma| liver tumor| non-neoplasia| normal| skin tumor| soft tissue/muscle tissue tumor| fetus| juvenile| adult	chrX	-	119392505	119445411	NM_017938	Q5JRV8	---	---	---	GO:0016021 // GO:0016020	integral component of membrane // membrane	inferred from electronic annotation // inferred from electronic annotation	---	---	---	---	---	---	---	---	17113710	22	1	main
16847199	6.59259	7.537	6.8049	7.15132		7.0648	6.97811		---	---	---	---	ENST00000390893	ENSEMBL	ncrna:novel chromosome:GRCh38:17:58631641:58631836:-1 gene:ENSG00000212195 gene_biotype:snoRNA transcript_biotype:snoRNA	100	100	15	15	TRUE	---	---	chr17	-	56709003	56709197	---	---	---	---	---	---	---	---	---	---	---	---	---	---	---	---	16847199	15	1	main
16663514	9.38901	10.2545	9.88806	8.39996		9.82175	9.14401		NM_001255	CDC20	cell division cycle 20	1p34.1	NM_001255	RefSeq	Homo sapiens cell division cycle 20 (CDC20), mRNA.	100	65	15	15	FALSE	Hs.524947	adrenal gland| ascites| blood| bone| bone marrow| brain| cervix| connective tissue| embryonic tissue| eye| heart| intestine| kidney| larynx| liver| lung| lymph| lymph node| mammary gland| muscle| nerve| ovary| pancreas| placenta| prostate| salivary gland| skin| stomach| testis| thymus| tonsil| trachea| uterus|adrenal tumor| bladder carcinoma| breast (mammary gland) tumor| cervical tumor| chondros…	chr1	+	43824599	43828874	NM_001255	Q12834	GO:0000278 // GO:0007049 // GO:0007067 // GO:0007094 // GO:0008284 // GO:0016567 // GO:0031145 // GO:0031145 // GO:0031915 // GO:0040020 // GO:0050773 // GO:0051436 // GO:0051437 // GO:0051439 // GO:0051488 // GO:0090129 // GO:0007049 // GO:0007399 // GO:0030154 // GO:0031915 // GO:0051301 // GO:0090129	mitotic cell cycle // cell cycle // mitotic nuclear division // mitotic spindle assembly checkpoint // positive regulation of cell proliferation // protein ubiquitination // anaphase-promoting complex-dependent proteasomal ubiquitin-dependent protein catabolic process // anaphase-promoting complex-dependent proteasomal ubiquitin-dependent protein catabolic process // positive regulation of synapt…	traceable author statement // traceable author statement // inferred from electronic annotation // traceable author statement // inferred from electronic annotation // inferred from electronic annotation // inferred from direct assay // traceable author statement // inferred from sequence or structural similarity // inferred from electronic annotation // inferred from electronic annotation // tra…	GO:0000922 // GO:0005634 // GO:0005654 // GO:0005680 // GO:0005730 // GO:0005737 // GO:0005813 // GO:0005819 // GO:0005829 // GO:0048471 // GO:0005737 // GO:0005815 // GO:0005856 // GO:0043234	spindle pole // nucleus // nucleoplasm // anaphase-promoting complex // nucleolus // cytoplasm // centrosome // spindle // cytosol // perinuclear region of cytoplasm // cytoplasm // microtubule organizing center // cytoskeleton // protein complex	inferred from electronic annotation // inferred from direct assay // traceable author statement // inferred from direct assay // inferred from direct assay // inferred from direct assay // inferred from electronic annotation // traceable author statement // traceable author statement // inferred from electronic annotation // inferred from electronic annotation // inferred from electronic annotati…	GO:0005515 // GO:0008022 // GO:0019899	protein binding // protein C-terminus binding // enzyme binding	inferred from physical interaction // inferred from physical interaction // inferred from physical interaction	GenMAPP	Cell_cycle_KEGG	---	---	---	16663514	23	1	main
16702571	6.61017	7.58195	8.57506	7.4061		7.09606	7.99058		NM_018518	MCM10	minichromosome maintenance complex component 10	10p13	NM_018518	RefSeq	Homo sapiens minichromosome maintenance complex component 10 (MCM10), transcript variant 2, mRNA.	100	86	18	18	FALSE	Hs.198363	ascites| blood| bone| bone marrow| brain| cervix| embryonic tissue| eye| heart| intestine| kidney| larynx| liver| lymph| lymph node| mammary gland| placenta| prostate| salivary gland| skin| testis| thymus| uterus| vascular| breast (mammary gland) tumor| cervical tumor| chondrosarcoma| colorectal tumor| gastrointestinal tumor| germ cell tumor| glioma| head and neck tumor| kidney tumor| leukemia| l…	chr10	+	13203554	13253104	NM_018518	Q7L590	GO:0000082 // GO:0000278 // GO:0006260 // GO:0008283 // GO:0006260	G1/S transition of mitotic cell cycle // mitotic cell cycle // DNA replication // cell proliferation // DNA replication	traceable author statement // traceable author statement // traceable author statement // inferred from electronic annotation // inferred from electronic annotation	GO:0005634 // GO:0005654 // GO:0005730 // GO:0005737 // GO:0005634	nucleus // nucleoplasm // nucleolus // cytoplasm // nucleus	inferred from direct assay // traceable author statement // inferred from direct assay // inferred from direct assay // inferred from electronic annotation	GO:0003677 // GO:0005515 // GO:0042802 // GO:0046872	DNA binding // protein binding // identical protein binding // metal ion binding	inferred from electronic annotation // inferred from physical interaction // inferred from physical interaction // inferred from electronic annotation	---	---	---	---	---	16702571	21	1	main
16804902	6.85325	7.86719	8.42393	7.33209		7.36022	7.87801		NM_000057	BLM	Bloom syndrome, RecQ helicase-like	15q26.1	NM_000057	RefSeq	Homo sapiens Bloom syndrome, RecQ helicase-like (BLM), transcript variant 1, mRNA.	79	79	22	28	TRUE	Hs.725208	blood| brain| cervix| connective tissue| embryonic tissue| eye| heart| intestine| kidney| larynx| liver| lung| lymph node| mammary gland| muscle| ovary| pharynx| placenta| salivary gland| skin| spleen| testis| thymus| tonsil| trachea| uterus| breast (mammary gland) tumor| colorectal tumor| germ cell tumor| kidney tumor| leukemia| normal| retinoblastoma| skin tumor| soft tissue/muscle tissue tumor…	chr15	+	91260558	91358859	NM_000057	P54132	GO:0000079 // GO:0000085 // GO:0000723 // GO:0000724 // GO:0000729 // GO:0000733 // GO:0006200 // GO:0006200 // GO:0006281 // GO:0006310 // GO:0006974 // GO:0006974 // GO:0010165 // GO:0031297 // GO:0031572 // GO:0032508 // GO:0032508 // GO:0032508 // GO:0045893 // GO:0045910 // GO:0045950 // GO:0046632 // GO:0046641 // GO:0048478 // GO:0051098 // GO:0051259 // GO:0051782 // GO:0070244 // GO:0071…	regulation of cyclin-dependent protein serine/threonine kinase activity // mitotic G2 phase // telomere maintenance // double-strand break repair via homologous recombination // DNA double-strand break processing // DNA strand renaturation // ATP catabolic process // ATP catabolic process // DNA repair // DNA recombination // cellular response to DNA damage stimulus // cellular response to DNA da…	inferred from mutant phenotype // non-traceable author statement // inferred from electronic annotation // non-traceable author statement // inferred from direct assay // inferred from direct assay // inferred from direct assay // inferred from electronic annotation // non-traceable author statement // non-traceable author statement // inferred from direct assay // inferred from mutant phenotype …	GO:0000228 // GO:0000781 // GO:0000800 // GO:0001673 // GO:0005634 // GO:0005657 // GO:0005730 // GO:0005737 // GO:0016363 // GO:0016605 // GO:0045120 // GO:0005622 // GO:0005634	nuclear chromosome // chromosome, telomeric region // lateral element // male germ cell nucleus // nucleus // replication fork // nucleolus // cytoplasm // nuclear matrix // PML body // pronucleus // intracellular // nucleus	inferred from direct assay // inferred from direct assay // inferred from direct assay // inferred from electronic annotation // inferred from direct assay // inferred from electronic annotation // inferred from direct assay // inferred from electronic annotation // inferred from direct assay // inferred from direct assay // inferred from electronic annotation // inferred from electronic annotati…	GO:0000405 // GO:0002039 // GO:0003697 // GO:0004003 // GO:0004003 // GO:0004386 // GO:0005515 // GO:0005524 // GO:0008026 // GO:0009378 // GO:0016887 // GO:0036310 // GO:0043140 // GO:0051880 // GO:0000166 // GO:0003676 // GO:0003677 // GO:0003824 // GO:0004386 // GO:0005524 // GO:0008026 // GO:0016787 // GO:0016818	bubble DNA binding // p53 binding // single-stranded DNA binding // ATP-dependent DNA helicase activity // ATP-dependent DNA helicase activity // helicase activity // protein binding // ATP binding // ATP-dependent helicase activity // four-way junction helicase activity // ATPase activity // annealing helicase activity // ATP-dependent 3'-5' DNA helicase activity // G-quadruplex DNA binding // n…	inferred from direct assay // inferred from physical interaction // inferred from direct assay // inferred from direct assay // inferred from mutant phenotype // inferred from direct assay // inferred from physical interaction // inferred from direct assay // inferred from direct assay // inferred from direct assay // inferred from direct assay // inferred from direct assay // inferred from elect…	---	---	---	---	---	16804902	28	1	main
16743686	7.26525	7.75286	11.4704	11.0874		7.50905	11.2789		NM_002424	MMP8	matrix metallopeptidase 8 (neutrophil collagenase)	11q22.3	NM_002424	RefSeq	Homo sapiens matrix metallopeptidase 8 (neutrophil collagenase) (MMP8), mRNA.	100	96	22	22	FALSE	Hs.161839	blood| bone marrow| connective tissue| liver| skin| thymus| leukemia| normal| skin tumor| soft tissue/muscle tissue tumor| fetus| neonate| adult	chr11	-	102582526	102597781	NM_002424	P22894	GO:0006508 // GO:0022617 // GO:0030198 // GO:0030574 // GO:0006508 // GO:0030574	proteolysis // extracellular matrix disassembly // extracellular matrix organization // collagen catabolic process // proteolysis // collagen catabolic process	inferred from direct assay // traceable author statement // traceable author statement // traceable author statement // inferred from electronic annotation // inferred from electronic annotation	GO:0005576 // GO:0005578 // GO:0005615 // GO:0005576 // GO:0031012 // GO:0005581	extracellular region // proteinaceous extracellular matrix // extracellular space // extracellular region // extracellular matrix // collagen trimer	traceable author statement // inferred from electronic annotation // inferred from direct assay // inferred from electronic annotation // inferred from electronic annotation // inferred from electronic annotation	GO:0004222 // GO:0004252 // GO:0005509 // GO:0008270 // GO:0008233 // GO:0008237 // GO:0008270 // GO:0016787 // GO:0046872	metalloendopeptidase activity // serine-type endopeptidase activity // calcium ion binding // zinc ion binding // peptidase activity // metallopeptidase activity // zinc ion binding // hydrolase activity // metal ion binding	inferred from electronic annotation // inferred from direct assay // inferred from electronic annotation // traceable author statement // inferred from electronic annotation // inferred from electronic annotation // inferred from electronic annotation // inferred from electronic annotation // inferred from electronic annotation	GenMAPP	Matrix_Metalloproteinases	---	---	---	16743686	23	1	main
16665621	7.54943	7.85386	8.0337	8.34755		7.70164	8.19063		NM_001293274	CACHD1	cache domain containing 1	1p31.3	NM_001293274	RefSeq	Homo sapiens cache domain containing 1 (CACHD1), transcript variant 2, mRNA.	100	88	21	21	FALSE	Hs.443891	adrenal gland| bone| brain| connective tissue| embryonic tissue| eye| heart| intestine| kidney| liver| lung| lymph node| mammary gland| mouth| muscle| pancreas| parathyroid| pharynx| placenta| prostate| skin| spleen| stomach| testis| thymus| thyroid| trachea| uterus|adrenal tumor| bladder carcinoma| breast (mammary gland) tumor| chondrosarcoma| colorectal tumor| gastrointestinal tumor| germ cell …	chr1	+	64936428	65158741	NM_001293274	Q5VU97	GO:0006816 // GO:0006810 // GO:0006811	calcium ion transport // transport // ion transport	inferred from electronic annotation // inferred from electronic annotation // inferred from electronic annotation	GO:0016021 // GO:0016020	integral component of membrane // membrane	inferred from electronic annotation // inferred from electronic annotation	---	---	---	---	---	---	---	---	16665621	24	1	main
17096623	9.0297	9.21158	5.56274	5.88657		9.12064	5.72466		NM_001127610	BAAT	bile acid CoA:amino acid N-acyltransferase	9q22.3	NM_001127610	RefSeq	Homo sapiens bile acid CoA:amino acid N-acyltransferase (BAAT), transcript variant 2, mRNA.	100	100	17	17	TRUE	Hs.284712	bladder| heart| liver| lung| muscle| skin| germ cell tumor| liver tumor| normal| skin tumor| fetus| adult	chr9	-	104122699	104147287	NM_001127610	Q14032	GO:0001889 // GO:0002152 // GO:0006544 // GO:0006631 // GO:0006637 // GO:0006699 // GO:0006699 // GO:0008206 // GO:0015721 // GO:0019530 // GO:0031100 // GO:0044281 // GO:0006629 // GO:0006637 // GO:0008206	liver development // bile acid conjugation // glycine metabolic process // fatty acid metabolic process // acyl-CoA metabolic process // bile acid biosynthetic process // bile acid biosynthetic process // bile acid metabolic process // bile acid and bile salt transport // taurine metabolic process // organ regeneration // small molecule metabolic process // lipid metabolic process // acyl-CoA met…	inferred from electronic annotation // inferred from direct assay // inferred from direct assay // inferred from electronic annotation // inferred from direct assay // inferred from direct assay // traceable author statement // traceable author statement // traceable author statement // inferred from direct assay // inferred from electronic annotation // traceable author statement // inferred fro…	GO:0005777 // GO:0005782 // GO:0005829 // GO:0005829 // GO:0005737 // GO:0005777 // GO:0005829	peroxisome // peroxisomal matrix // cytosol // cytosol // cytoplasm // peroxisome // cytosol	inferred from direct assay // traceable author statement // inferred from direct assay // traceable author statement // inferred from electronic annotation // inferred from electronic annotation // inferred from electronic annotation	GO:0005102 // GO:0016290 // GO:0016410 // GO:0047963 // GO:0052815 // GO:0052816 // GO:0052817 // GO:0016740 // GO:0016746 // GO:0016787 // GO:0016790 // GO:0047963	receptor binding // palmitoyl-CoA hydrolase activity // N-acyltransferase activity // glycine N-choloyltransferase activity // medium-chain acyl-CoA hydrolase activity // long-chain acyl-CoA hydrolase activity // very long chain acyl-CoA hydrolase activity // transferase activity // transferase activity, transferring acyl groups // hydrolase activity // thiolester hydrolase activity // glycine N-…	inferred from physical interaction // inferred from electronic annotation // inferred from direct assay // inferred from direct assay // inferred from direct assay // inferred from direct assay // inferred from direct assay // inferred from electronic annotation // inferred from electronic annotation // inferred from electronic annotation // inferred from electronic annotation // inferred from el…	---	---	---	---	---	17096623	17	1	main
16972616	6.63287	7.21829	7.8286	7.07807		6.92558	7.45333		NM_018248	NEIL3	nei endonuclease VIII-like 3 (E. coli)	4q34.3	NM_018248	RefSeq	Homo sapiens nei endonuclease VIII-like 3 (E. coli) (NEIL3), mRNA.	90	90	18	20	TRUE	Hs.405467	bladder| blood| bone| bone marrow| brain| embryonic tissue| eye| heart| kidney| liver| lung| lymph| lymph node| mammary gland| pancreas| salivary gland| skin| testis| thymus| tonsil| umbilical cord| uterus| vascular| bladder carcinoma| breast (mammary gland) tumor| germ cell tumor| glioma| kidney tumor| leukemia| liver tumor| lymphoma| normal| pancreatic tumor| primitive neuroectodermal tumor of …	chr4	+	178230990	178284097	NM_018248	Q8TAT5	GO:0000737 // GO:0000737 // GO:0006284 // GO:0006289 // GO:0006281 // GO:0006284 // GO:0006974 // GO:0008152	DNA catabolic process, endonucleolytic // DNA catabolic process, endonucleolytic // base-excision repair // nucleotide-excision repair // DNA repair // base-excision repair // cellular response to DNA damage stimulus // metabolic process	inferred from direct assay // inferred from electronic annotation // inferred from sequence or structural similarity // inferred from electronic annotation // inferred from electronic annotation // inferred from electronic annotation // inferred from electronic annotation // inferred from electronic annotation	GO:0005634 // GO:0005634	nucleus // nucleus	inferred from direct assay // inferred from electronic annotation	GO:0000405 // GO:0003684 // GO:0003690 // GO:0003697 // GO:0003906 // GO:0008270 // GO:0019104 // GO:0019104 // GO:0000405 // GO:0003676 // GO:0003677 // GO:0003690 // GO:0003824 // GO:0003906 // GO:0016787 // GO:0016798 // GO:0016799 // GO:0016829 // GO:0046872	bubble DNA binding // damaged DNA binding // double-stranded DNA binding // single-stranded DNA binding // DNA-(apurinic or apyrimidinic site) lyase activity // zinc ion binding // DNA N-glycosylase activity // DNA N-glycosylase activity // bubble DNA binding // nucleic acid binding // DNA binding // double-stranded DNA binding // catalytic activity // DNA-(apurinic or apyrimidinic site) lyase ac…	inferred from sequence or structural similarity // inferred from electronic annotation // inferred from sequence or structural similarity // inferred from direct assay // inferred from direct assay // inferred from electronic annotation // inferred from direct assay // inferred from sequence or structural similarity // inferred from electronic annotation // inferred from electronic annotation // …	---	---	---	---	---	16972616	20	1	main
16672946	8.84005	9.01309	9.76181	9.90086		8.92657	9.83134		NM_001184866	FCRLA	Fc receptor-like A	1q23.3	NM_001184866	RefSeq	Homo sapiens Fc receptor-like A (FCRLA), transcript variant 1, mRNA.	100	68	13	13	FALSE	Hs.266331	blood| bone marrow| brain| connective tissue| heart| intestine| kidney| lung| lymph| lymph node| mammary gland| mouth| muscle| pancreas| pharynx| skin| spleen| stomach| thymus| tonsil| breast (mammary gland) tumor| chondrosarcoma| gastrointestinal tumor| germ cell tumor| head and neck tumor| kidney tumor| leukemia| lymphoma| non-neoplasia| normal| skin tumor| soft tissue/muscle tissue tumor| fetu…	chr1	+	161676762	161684142	NM_001184866	Q7L513	GO:0030154	cell differentiation	inferred from electronic annotation	GO:0005576 // GO:0005737 // GO:0005737	extracellular region // cytoplasm // cytoplasm	inferred from electronic annotation // inferred from direct assay // inferred from electronic annotation	---	---	---	---	---	---	---	---	16672946	19	1	main
16917963	11.9128	10.7167	7.26945	7.38205		11.3147	7.32575		NM_001322	CST2	cystatin SA	20p11.21	NM_001322	RefSeq	Homo sapiens cystatin SA (CST2), mRNA.	100	100	10	10	TRUE	Hs.669305	intestine| pancreas| salivary gland| skin| stomach| testis| uterus| colorectal tumor| gastrointestinal tumor| normal| pancreatic tumor| skin tumor| uterine tumor| adult	chr20	-	23804404	23807368	NM_001322	P09228	GO:0001580 // GO:0010951 // GO:0010951 // GO:0010466	detection of chemical stimulus involved in sensory perception of bitter taste // negative regulation of endopeptidase activity // negative regulation of endopeptidase activity // negative regulation of peptidase activity	inferred from direct assay // inferred from electronic annotation // traceable author statement // inferred from electronic annotation	GO:0005615 // GO:0005576	extracellular space // extracellular region	inferred from direct assay // inferred from electronic annotation	GO:0004869 // GO:0004869 // GO:0030414	cysteine-type endopeptidase inhibitor activity // cysteine-type endopeptidase inhibitor activity // peptidase inhibitor activity	inferred from electronic annotation // traceable author statement // inferred from electronic annotation	---	---	---	---	---	16917963	10	1	main
16813342	8.04198	8.79507	9.25401	8.18855		8.41852	8.72128		NM_001267580	PRC1	protein regulator of cytokinesis 1	15q26.1	NM_001267580	RefSeq	Homo sapiens protein regulator of cytokinesis 1 (PRC1), transcript variant 4, mRNA.	64	64	14	22	TRUE	Hs.366401	adrenal gland| ascites| bladder| blood| bone| bone marrow| brain| cervix| connective tissue| embryonic tissue| esophagus| eye| heart| intestine| kidney| larynx| liver| lung| lymph| lymph node| mammary gland| mouth| muscle| nerve| ovary| pancreas| parathyroid| pituitary gland| placenta| prostate| skin| stomach| testis| thymus| trachea| umbilical cord| uterus| vascular|adrenal tumor| bladder carcin…	chr15	-	91509268	91538859	NM_001267580	O43663	GO:0000022 // GO:0000910 // GO:0000226 // GO:0000910 // GO:0000910 // GO:0007049 // GO:0051301	mitotic spindle elongation // cytokinesis // microtubule cytoskeleton organization // cytokinesis // cytokinesis // cell cycle // cell division	traceable author statement // inferred from direct assay // inferred from electronic annotation // inferred from electronic annotation // traceable author statement // inferred from electronic annotation // inferred from electronic annotation	GO:0000922 // GO:0005634 // GO:0005730 // GO:0005737 // GO:0005819 // GO:0005876 // GO:0005886 // GO:0015630 // GO:0005634 // GO:0005634 // GO:0005737 // GO:0005856 // GO:0005874	spindle pole // nucleus // nucleolus // cytoplasm // spindle // spindle microtubule // plasma membrane // microtubule cytoskeleton // nucleus // nucleus // cytoplasm // cytoskeleton // microtubule	inferred from electronic annotation // inferred from direct assay // inferred from direct assay // inferred from direct assay // inferred from direct assay // traceable author statement // inferred from direct assay // inferred from direct assay // inferred from electronic annotation // traceable author statement // inferred from electronic annotation // inferred from electronic annotation // inf…	GO:0005515 // GO:0008017 // GO:0019901 // GO:0042802	protein binding // microtubule binding // protein kinase binding // identical protein binding	inferred from physical interaction // inferred from electronic annotation // inferred from physical interaction // inferred from physical interaction	---	---	---	---	---	16813342	22	1	main
17013126	8.39305	8.43645	9.6255	9.55991		8.41475	9.5927		NM_001032394	GPR126	G protein-coupled receptor 126	6q24.1	NM_001032394	RefSeq	Homo sapiens G protein-coupled receptor 126 (GPR126), transcript variant a2, mRNA.	75	75	24	32	TRUE	Hs.743302	ascites| bone| brain| connective tissue| ear| embryonic tissue| eye| heart| intestine| kidney| liver| lung| lymph| mammary gland| mouth| muscle| nerve| pancreas| pituitary gland| placenta| prostate| skin| stomach| testis| thymus| trachea| umbilical cord| uterus| vascular| breast (mammary gland) tumor| chondrosarcoma| colorectal tumor| gastrointestinal tumor| germ cell tumor| head and neck tumor| …	chr6	+	142622991	142767403	NM_001032394	Q86SQ4	GO:0007186 // GO:0007218 // GO:0007165 // GO:0007166 // GO:0007186	G-protein coupled receptor signaling pathway // neuropeptide signaling pathway // signal transduction // cell surface receptor signaling pathway // G-protein coupled receptor signaling pathway	traceable author statement // inferred from electronic annotation // inferred from electronic annotation // inferred from electronic annotation // inferred from electronic annotation	GO:0005886 // GO:0016021 // GO:0016020 // GO:0016021	plasma membrane // integral component of membrane // membrane // integral component of membrane	inferred from electronic annotation // inferred from electronic annotation // inferred from electronic annotation // traceable author statement	GO:0004930 // GO:0004871 // GO:0004888 // GO:0004930	G-protein coupled receptor activity // signal transducer activity // transmembrane signaling receptor activity // G-protein coupled receptor activity	inferred from electronic annotation // inferred from electronic annotation // inferred from electronic annotation // traceable author statement	---	---	---	---	---	17013126	32	1	main
16750761	7.18833	8.18023	8.09919	6.9868		7.68428	7.54299		NM_001100620	TROAP	trophinin associated protein	12q13.12	NM_001100620	RefSeq	Homo sapiens trophinin associated protein (TROAP), transcript variant 2, mRNA.	100	38	11	11	FALSE	Hs.524399	ascites| bladder| blood| bone| bone marrow| brain| cervix| connective tissue| embryonic tissue| eye| heart| intestine| kidney| liver| lung| lymph| lymph node| mammary gland| mouth| muscle| nerve| ovary| placenta| prostate| skin| spleen| stomach| testis| thymus| thyroid| umbilical cord| uterus| vascular| bladder carcinoma| breast (mammary gland) tumor| cervical tumor| chondrosarcoma| colorectal tu…	chr12	+	49716971	49725514	NM_001100620	Q12815	GO:0007155 // GO:0007155	cell adhesion // cell adhesion	inferred from electronic annotation // traceable author statement	GO:0005737 // GO:0005737	cytoplasm // cytoplasm	inferred from electronic annotation // traceable author statement	GO:0005515	protein binding	inferred from physical interaction	---	---	---	---	---	16750761	29	1	main
16685165	7.24102	7.82461	7.87854	6.79879		7.53281	7.33867		NM_001190481	CLSPN	claspin	1p34.2	NM_001190481	RefSeq	Homo sapiens claspin (CLSPN), transcript variant 2, mRNA.	100	81	17	17	FALSE	Hs.175613	adrenal gland| ascites| bladder| blood| bone| bone marrow| brain| embryonic tissue| eye| intestine| kidney| larynx| liver| lung| lymph node| mammary gland| muscle| pharynx| placenta| prostate| skin| stomach| testis| uterus| vascular|adrenal tumor| bladder carcinoma| breast (mammary gland) tumor| chondrosarcoma| colorectal tumor| gastrointestinal tumor| germ cell tumor| glioma| head and neck tumor…	chr1	-	36185819	36235568	NM_001190481	Q9HAW4	GO:0000077 // GO:0006260 // GO:0006281 // GO:0006915 // GO:0006921 // GO:0018105 // GO:0031572 // GO:0032147 // GO:0033314 // GO:0006974 // GO:0007049	DNA damage checkpoint // DNA replication // DNA repair // apoptotic process // cellular component disassembly involved in execution phase of apoptosis // peptidyl-serine phosphorylation // G2 DNA damage checkpoint // activation of protein kinase activity // mitotic DNA replication checkpoint // cellular response to DNA damage stimulus // cell cycle	inferred from mutant phenotype // traceable author statement // inferred from electronic annotation // traceable author statement // traceable author statement // inferred from direct assay // inferred from direct assay // inferred from direct assay // inferred from mutant phenotype // inferred from electronic annotation // inferred from electronic annotation	GO:0005654 // GO:0005634	nucleoplasm // nucleus	traceable author statement // inferred from electronic annotation	GO:0003677 // GO:0005515 // GO:0010997	DNA binding // protein binding // anaphase-promoting complex binding	inferred from electronic annotation // inferred from physical interaction // inferred from physical interaction	---	---	---	---	---	16685165	21	1	main
16705507	8.53838	7.78878	6.26089	5.64645		8.16358	5.95367		NM_002727	SRGN	serglycin	10q22.1	NM_002727	RefSeq	Homo sapiens serglycin (SRGN), transcript variant 1, mRNA.	100	100	20	20	FALSE	Hs.1908	adrenal gland| ascites| blood| bone| bone marrow| brain| connective tissue| ear| embryonic tissue| eye| heart| intestine| kidney| liver| lung| lymph node| mammary gland| mouth| muscle| nerve| ovary| pancreas| parathyroid| pharynx| pituitary gland| placenta| prostate| skin| spleen| stomach| testis| tonsil| uterus| vascular|adrenal tumor| bladder carcinoma| breast (mammary gland) tumor| chondrosarc…	chr10	+	70847828	70864567	NM_002727	P10124	GO:0002576 // GO:0007596 // GO:0008626 // GO:0016485 // GO:0030168 // GO:0030502 // GO:0031214 // GO:0033364 // GO:0033371 // GO:0033373 // GO:0033382 // GO:0050710 // GO:0006915 // GO:0016485 // GO:0033364 // GO:0033371 // GO:0033373 // GO:0033382 // GO:0050710	platelet degranulation // blood coagulation // granzyme-mediated apoptotic signaling pathway // protein processing // platelet activation // negative regulation of bone mineralization // biomineral tissue development // mast cell secretory granule organization // T cell secretory granule organization // maintenance of protease location in mast cell secretory granule // maintenance of granzyme B l…	traceable author statement // traceable author statement // inferred from direct assay // inferred from sequence or structural similarity // traceable author statement // inferred from direct assay // inferred from electronic annotation // inferred from sequence or structural similarity // inferred from sequence or structural similarity // inferred from sequence or structural similarity // inferr…	GO:0005576 // GO:0005615 // GO:0005794 // GO:0031093 // GO:0042588 // GO:0042629 // GO:0005576 // GO:0005615 // GO:0005794 // GO:0042629	extracellular region // extracellular space // Golgi apparatus // platelet alpha granule lumen // zymogen granule // mast cell granule // extracellular region // extracellular space // Golgi apparatus // mast cell granule	traceable author statement // inferred from direct assay // inferred from direct assay // traceable author statement // inferred from electronic annotation // inferred from sequence or structural similarity // inferred from electronic annotation // inferred from electronic annotation // inferred from electronic annotation // inferred from electronic annotation	GO:0005515 // GO:0005518	protein binding // collagen binding	inferred from physical interaction // inferred from electronic annotation	---	---	---	---	---	16705507	20	1	main
16838359	7.21643	7.5048	9.66864	7.96088		7.36062	8.81476		NM_001012270	BIRC5	baculoviral IAP repeat containing 5	17q25	NM_001012270	RefSeq	Homo sapiens baculoviral IAP repeat containing 5 (BIRC5), transcript variant 2, mRNA.	86	86	19	22	TRUE	Hs.744872	adrenal gland| ascites| blood| bone| bone marrow| brain| cervix| connective tissue| embryonic tissue| esophagus| eye| heart| intestine| kidney| liver| lung| lymph| lymph node| mammary gland| mouth| muscle| ovary| pancreas| placenta| prostate| salivary gland| skin| spleen| stomach| testis| thymus| thyroid| tonsil| umbilical cord| uterus| vascular|adrenal tumor| breast (mammary gland) tumor| cervic…	chr17	+	76210277	76221716	NM_001012270	O15392	GO:0000086 // GO:0000278 // GO:0000910 // GO:0006351 // GO:0006468 // GO:0006915 // GO:0007059 // GO:0007067 // GO:0007067 // GO:0008284 // GO:0010951 // GO:0031503 // GO:0031536 // GO:0031577 // GO:0043066 // GO:0043066 // GO:0043154 // GO:0043154 // GO:0045892 // GO:0045931 // GO:0051301 // GO:0051303 // GO:0006355 // GO:0007049 // GO:0010466 // GO:0051301 // GO:0000226 // GO:0009790 // GO:0043…	G2/M transition of mitotic cell cycle // mitotic cell cycle // cytokinesis // transcription, DNA-templated // protein phosphorylation // apoptotic process // chromosome segregation // mitotic nuclear division // mitotic nuclear division // positive regulation of cell proliferation // negative regulation of endopeptidase activity // protein complex localization // positive regulation of exit from …	inferred from direct assay // traceable author statement // inferred from mutant phenotype // inferred from electronic annotation // inferred from direct assay // inferred from electronic annotation // inferred from electronic annotation // inferred from electronic annotation // traceable author statement // traceable author statement // inferred from electronic annotation // inferred from mutant…	GO:0000228 // GO:0000775 // GO:0000777 // GO:0005634 // GO:0005737 // GO:0005814 // GO:0005819 // GO:0005829 // GO:0005829 // GO:0005874 // GO:0005876 // GO:0005881 // GO:0030496 // GO:0031021 // GO:0032133 // GO:0000775 // GO:0000776 // GO:0000777 // GO:0005634 // GO:0005694 // GO:0005737 // GO:0005856 // GO:0030496	nuclear chromosome // chromosome, centromeric region // condensed chromosome kinetochore // nucleus // cytoplasm // centriole // spindle // cytosol // cytosol // microtubule // spindle microtubule // cytoplasmic microtubule // midbody // interphase microtubule organizing center // chromosome passenger complex // chromosome, centromeric region // kinetochore // condensed chromosome kinetochore // …	inferred from direct assay // inferred from direct assay // inferred from direct assay // inferred from direct assay // inferred from direct assay // inferred from direct assay // inferred from electronic annotation // inferred from direct assay // traceable author statement // inferred from electronic annotation // inferred from direct assay // inferred from direct assay // inferred from direct …	GO:0004869 // GO:0005515 // GO:0008017 // GO:0008017 // GO:0008270 // GO:0008270 // GO:0008536 // GO:0015631 // GO:0019899 // GO:0042802 // GO:0042803 // GO:0042803 // GO:0043027 // GO:0046872 // GO:0046982 // GO:0048037 // GO:0050897 // GO:0051087 // GO:0030414 // GO:0004872 // GO:0008233	cysteine-type endopeptidase inhibitor activity // protein binding // microtubule binding // microtubule binding // zinc ion binding // zinc ion binding // Ran GTPase binding // tubulin binding // enzyme binding // identical protein binding // protein homodimerization activity // protein homodimerization activity // cysteine-type endopeptidase inhibitor activity involved in apoptotic process // me…	inferred from electronic annotation // inferred from physical interaction // inferred from direct assay // traceable author statement // inferred from direct assay // non-traceable author statement // inferred from physical interaction // inferred from direct assay // inferred from physical interaction // inferred from physical interaction // inferred from direct assay // inferred from physical i…	GenMAPP	Apoptosis	---	---	---	16838359	22	1	main
16698984	6.79472	7.0313	7.74908	6.79012		6.91301	7.2696		NM_001204182	NEK2	NIMA-related kinase 2	1q32.3	NM_001204182	RefSeq	Homo sapiens NIMA-related kinase 2 (NEK2), transcript variant 3, mRNA.	100	65	17	17	FALSE	Hs.153704	ascites| bladder| blood| bone| bone marrow| brain| cervix| connective tissue| embryonic tissue| intestine| kidney| larynx| liver| lung| lymph node| mammary gland| ovary| pancreas| placenta| prostate| salivary gland| skin| stomach| testis| thymus| uterus| vascular| bladder carcinoma| breast (mammary gland) tumor| cervical tumor| chondrosarcoma| colorectal tumor| gastrointestinal tumor| germ cell t…	chr1	-	211831598	211848972	NM_001204182	P51955	GO:0000070 // GO:0000086 // GO:0000278 // GO:0001824 // GO:0006468 // GO:0007059 // GO:0007067 // GO:0007088 // GO:0007126 // GO:0043392 // GO:0046602 // GO:0046777 // GO:0046777 // GO:0051225 // GO:0051299 // GO:0051988 // GO:0090307 // GO:0006468 // GO:0006468 // GO:0007049 // GO:0007059 // GO:0007067 // GO:0016310 // GO:0051301 // GO:1903126	mitotic sister chromatid segregation // G2/M transition of mitotic cell cycle // mitotic cell cycle // blastocyst development // protein phosphorylation // chromosome segregation // mitotic nuclear division // regulation of mitosis // meiotic nuclear division // negative regulation of DNA binding // regulation of mitotic centrosome separation // protein autophosphorylation // protein autophosphor…	inferred from electronic annotation // traceable author statement // traceable author statement // inferred from electronic annotation // inferred from direct assay // inferred from direct assay // traceable author statement // traceable author statement // inferred from electronic annotation // inferred from electronic annotation // traceable author statement // inferred from direct assay // inf…	GO:0000776 // GO:0000777 // GO:0000794 // GO:0000922 // GO:0005634 // GO:0005730 // GO:0005737 // GO:0005813 // GO:0005829 // GO:0005874 // GO:0030496 // GO:0043234 // GO:0045171 // GO:0000775 // GO:0000776 // GO:0005634 // GO:0005694 // GO:0005737 // GO:0005813 // GO:0005815 // GO:0005856	kinetochore // condensed chromosome kinetochore // condensed nuclear chromosome // spindle pole // nucleus // nucleolus // cytoplasm // centrosome // cytosol // microtubule // midbody // protein complex // intercellular bridge // chromosome, centromeric region // kinetochore // nucleus // chromosome // cytoplasm // centrosome // microtubule organizing center // cytoskeleton	inferred from direct assay // inferred from electronic annotation // inferred from electronic annotation // inferred from electronic annotation // inferred from direct assay // inferred from electronic annotation // inferred from direct assay // inferred from direct assay // traceable author statement // inferred from electronic annotation // inferred from electronic annotation // inferred from m…	GO:0004672 // GO:0004674 // GO:0005515 // GO:0005524 // GO:0019903 // GO:0046872 // GO:0000166 // GO:0004672 // GO:0004672 // GO:0004674 // GO:0016301 // GO:0016740 // GO:0016772	protein kinase activity // protein serine/threonine kinase activity // protein binding // ATP binding // protein phosphatase binding // metal ion binding // nucleotide binding // protein kinase activity // protein kinase activity // protein serine/threonine kinase activity // kinase activity // transferase activity // transferase activity, transferring phosphorus-containing groups	inferred from direct assay // traceable author statement // inferred from physical interaction // inferred from electronic annotation // inferred from physical interaction // inferred from electronic annotation // inferred from electronic annotation // inferred from electronic annotation // inferred from mutant phenotype // inferred from electronic annotation // inferred from electronic annotatio…	---	---	---	---	---	16698984	26	1	main
17048228	6.78616	7.16373	7.5528	7.21446		6.97494	7.38363		NM_003505	FZD1	frizzled class receptor 1	7q21	NM_003505	RefSeq	Homo sapiens frizzled class receptor 1 (FZD1), mRNA.	100	100	21	21	TRUE	Hs.94234	ascites| bladder| blood| bone| brain| connective tissue| ear| embryonic tissue| eye| heart| intestine| kidney| larynx| liver| lung| mammary gland| muscle| nerve| ovary| pancreas| placenta| prostate| skin| spleen| stomach| testis| trachea| uterus| vascular| breast (mammary gland) tumor| chondrosarcoma| colorectal tumor| gastrointestinal tumor| germ cell tumor| glioma| head and neck tumor| leukemia…	chr7	+	90893783	90898132	NM_003505	Q9UP38	GO:0001934 // GO:0001944 // GO:0003149 // GO:0003150 // GO:0003151 // GO:0007199 // GO:0007223 // GO:0007267 // GO:0007409 // GO:0007420 // GO:0008406 // GO:0030182 // GO:0030514 // GO:0030855 // GO:0035414 // GO:0035425 // GO:0042493 // GO:0044338 // GO:0044339 // GO:0045892 // GO:0045893 // GO:0048286 // GO:0051091 // GO:0060022 // GO:0060070 // GO:0090090 // GO:0090179 // GO:0001944 // GO:0007…	positive regulation of protein phosphorylation // vasculature development // membranous septum morphogenesis // muscular septum morphogenesis // outflow tract morphogenesis // G-protein coupled receptor signaling pathway coupled to cGMP nucleotide second messenger // Wnt signaling pathway, calcium modulating pathway // cell-cell signaling // axonogenesis // brain development // gonad development …	inferred from electronic annotation // not recorded // inferred from electronic annotation // inferred from electronic annotation // inferred from electronic annotation // not recorded // not recorded // inferred from direct assay // not recorded // not recorded // not recorded // inferred from sequence or structural similarity // not recorded // not recorded // inferred from electronic annotatio…	GO:0005737 // GO:0005886 // GO:0009986 // GO:0016021 // GO:0032589 // GO:0045177 // GO:0005737 // GO:0005886 // GO:0016020 // GO:0032589 // GO:0045177	cytoplasm // plasma membrane // cell surface // integral component of membrane // neuron projection membrane // apical part of cell // cytoplasm // plasma membrane // membrane // neuron projection membrane // apical part of cell	not recorded // traceable author statement // inferred from direct assay // inferred from electronic annotation // not recorded // not recorded // --- // inferred from electronic annotation // inferred from electronic annotation // --- // ---	GO:0004930 // GO:0005102 // GO:0005109 // GO:0005515 // GO:0017147 // GO:0030165 // GO:0042813 // GO:0004871 // GO:0004888 // GO:0017147 // GO:0042813	G-protein coupled receptor activity // receptor binding // frizzled binding // protein binding // Wnt-protein binding // PDZ domain binding // Wnt-activated receptor activity // signal transducer activity // transmembrane signaling receptor activity // Wnt-protein binding // Wnt-activated receptor activity	inferred from electronic annotation // inferred from physical interaction // inferred from physical interaction // inferred from physical interaction // inferred from physical interaction // inferred from physical interaction // inferred from direct assay // inferred from electronic annotation // inferred from electronic annotation // inferred from electronic annotation // inferred from electroni…	GenMAPP	Wnt_signaling	---	---	---	17048228	21	1	main
16706685	7.27512	8.44082	6.06633	5.63875		7.85797	5.85254		NM_001010848	NRG3	neuregulin 3	10q22-q23	NM_001010848	RefSeq	Homo sapiens neuregulin 3 (NRG3), transcript variant 1, mRNA.	100	56	14	14	FALSE	Hs.125119	brain| eye| kidney| liver| muscle| skin| germ cell tumor| non-neoplasia| normal| primitive neuroectodermal tumor of the CNS| skin tumor| fetus| infant| adult	chr10	+	83635070	84746935	NM_001010848	P56975	GO:0001558 // GO:0007171 // GO:0007389 // GO:0060596 // GO:0030879 // GO:0009790	regulation of cell growth // activation of transmembrane receptor protein tyrosine kinase activity // pattern specification process // mammary placode formation // mammary gland development // embryo development	non-traceable author statement // non-traceable author statement // inferred from electronic annotation // inferred from electronic annotation // inferred from electronic annotation // inferred from electronic annotation	GO:0005576 // GO:0005887 // GO:0005576 // GO:0005886 // GO:0016020 // GO:0016021	extracellular region // integral component of plasma membrane // extracellular region // plasma membrane // membrane // integral component of membrane	non-traceable author statement // non-traceable author statement // inferred from electronic annotation // inferred from electronic annotation // inferred from electronic annotation // inferred from electronic annotation	GO:0008083 // GO:0030297 // GO:0030971 // GO:0008083 // GO:0005102	growth factor activity // transmembrane receptor protein tyrosine kinase activator activity // receptor tyrosine kinase binding // growth factor activity // receptor binding	non-traceable author statement // non-traceable author statement // non-traceable author statement // inferred from electronic annotation // inferred from electronic annotation	---	---	---	---	---	16706685	25	1	main
16996722	5.89057	7.30708	8.03795	7.18863		6.59882	7.61329		NM_001267038	CENPK	centromere protein K	5q12.3	NM_001267038	RefSeq	Homo sapiens centromere protein K (CENPK), transcript variant 2, mRNA.	65	65	20	31	TRUE	Hs.529778	ascites| bladder| blood| bone marrow| brain| cervix| embryonic tissue| intestine| kidney| liver| lung| lymph| lymph node| mammary gland| mouth| muscle| pancreas| pharynx| placenta| prostate| salivary gland| skin| stomach| testis| uterus| bladder carcinoma| breast (mammary gland) tumor| cervical tumor| colorectal tumor| gastrointestinal tumor| germ cell tumor| glioma| kidney tumor| leukemia| liver…	chr5	-	64813593	64858998	NM_001267038	Q9BS16	GO:0000278 // GO:0006334 // GO:0034080 // GO:0045944	mitotic cell cycle // nucleosome assembly // centromere-specific nucleosome assembly // positive regulation of transcription from RNA polymerase II promoter	traceable author statement // traceable author statement // traceable author statement // inferred from electronic annotation	GO:0000777 // GO:0005654 // GO:0005829 // GO:0000775 // GO:0000776 // GO:0005634 // GO:0005694	condensed chromosome kinetochore // nucleoplasm // cytosol // chromosome, centromeric region // kinetochore // nucleus // chromosome	inferred from electronic annotation // traceable author statement // traceable author statement // inferred from electronic annotation // inferred from electronic annotation // inferred from electronic annotation // inferred from electronic annotation	---	---	---	---	---	---	---	---	16996722	31	1	main
16836492	10.0469	10.499	11.1919	10.2019		10.2729	10.6969		NM_018304	PRR11	proline rich 11	17q22	NM_018304	RefSeq	Homo sapiens proline rich 11 (PRR11), mRNA.	100	100	27	27	TRUE	Hs.631750	ascites| blood| bone| bone marrow| brain| cervix| connective tissue| ear| embryonic tissue| esophagus| eye| heart| intestine| kidney| liver| lung| lymph| lymph node| mammary gland| mouth| muscle| ovary| pancreas| placenta| prostate| skin| stomach| testis| thymus| uterus| vascular| breast (mammary gland) tumor| cervical tumor| chondrosarcoma| esophageal tumor| gastrointestinal tumor| germ cell tum…	chr17	+	57232860	57284070	NM_018304	Q96HE9	---	---	---	GO:0005737 // GO:0016020	cytoplasm // membrane	inferred from electronic annotation // inferred from direct assay	---	---	---	---	---	---	---	---	16836492	27	1	main
17122318	5.98515	5.43102	6.85335	6.59547		5.70809	6.72441		XM_005275934	LOC100505498	uncharacterized LOC100505498	---	XM_005275934	RefSeq	PREDICTED: Homo sapiens uncharacterized LOC100505498 (LOC100505498), mRNA.	100	100	26	26	TRUE	Hs.42192	connective tissue| eye| kidney| skin| testis| thymus| normal| soft tissue/muscle tissue tumor| adult	chrU	+	1	530	---	---	---	---	---	---	---	---	---	---	---	---	---	---	---	---	17122318	26	3	rescue
16986351	8.04376	9.16849	6.17147	6.09291		8.60612	6.13219		NM_001285460	IQGAP2	IQ motif containing GTPase activating protein 2	5q13.3	NM_001285460	RefSeq	Homo sapiens IQ motif containing GTPase activating protein 2 (IQGAP2), transcript variant 2, mRNA.	66	66	29	44	TRUE	Hs.291030	adipose tissue| adrenal gland| ascites| blood| bone marrow| brain| connective tissue| ear| embryonic tissue| esophagus| eye| intestine| kidney| larynx| liver| lung| lymph node| mouth| muscle| ovary| pancreas| parathyroid| placenta| prostate| salivary gland| skin| spleen| stomach| testis| thyroid| trachea| uterus|adrenal tumor| chondrosarcoma| colorectal tumor| esophageal tumor| gastrointestinal t…	chr5	+	75699074	76003957	NM_001285460	Q13576	GO:0007165 // GO:0007264 // GO:0032320 // GO:0043086 // GO:0007165 // GO:0043547 // GO:0051056	signal transduction // small GTPase mediated signal transduction // positive regulation of Ras GTPase activity // negative regulation of catalytic activity // signal transduction // positive regulation of GTPase activity // regulation of small GTPase mediated signal transduction	traceable author statement // inferred from electronic annotation // inferred from electronic annotation // traceable author statement // inferred from electronic annotation // inferred from electronic annotation // inferred from electronic annotation	GO:0005874 // GO:0005902 // GO:0015629 // GO:0070062 // GO:0005622	microtubule // microvillus // actin cytoskeleton // extracellular vesicular exosome // intracellular	inferred from direct assay // inferred from electronic annotation // traceable author statement // inferred from direct assay // inferred from electronic annotation	GO:0003779 // GO:0005095 // GO:0005099 // GO:0005516 // GO:0005547 // GO:0005096	actin binding // GTPase inhibitor activity // Ras GTPase activator activity // calmodulin binding // phosphatidylinositol-3,4,5-trisphosphate binding // GTPase activator activity	traceable author statement // traceable author statement // inferred from electronic annotation // inferred from electronic annotation // inferred from direct assay // inferred from electronic annotation	GenMAPP	G13_Signaling_Pathway	---	---	---	16986351	44	1	main
17027710	7.48918	8.26605	8.17503	7.18564		7.87762	7.68033		NM_001077511	TCF19	transcription factor 19	6p21.3	NM_001077511	RefSeq	Homo sapiens transcription factor 19 (TCF19), transcript variant 2, mRNA.	89	89	24	27	TRUE	Hs.584807	adrenal gland| ascites| bladder| blood| bone| bone marrow| brain| cervix| connective tissue| embryonic tissue| esophagus| eye| heart| intestine| kidney| larynx| liver| lung| lymph| lymph node| mammary gland| mouth| muscle| pancreas| pharynx| placenta| prostate| skin| spleen| stomach| testis| thymus| trachea| uterus| vascular|adrenal tumor| breast (mammary gland) tumor| cervical tumor| chondrosarc…	chr6_cox_hap2	+	2641076	2646745	NM_001077511	Q9Y242	GO:0006351 // GO:0006357 // GO:0008283 // GO:0006355	transcription, DNA-templated // regulation of transcription from RNA polymerase II promoter // cell proliferation // regulation of transcription, DNA-templated	inferred from electronic annotation // traceable author statement // traceable author statement // inferred from electronic annotation	GO:0005634	nucleus	inferred from electronic annotation	GO:0003700 // GO:0008270 // GO:0046872	sequence-specific DNA binding transcription factor activity // zinc ion binding // metal ion binding	traceable author statement // inferred from electronic annotation // inferred from electronic annotation	---	---	---	---	---	17027710	27	3	main
17030560	7.48918	8.26605	8.17503	7.18564		7.87762	7.68033		NM_001077511	TCF19	transcription factor 19	6p21.3	NM_001077511	RefSeq	Homo sapiens transcription factor 19 (TCF19), transcript variant 2, mRNA.	89	89	24	27	TRUE	Hs.584807	adrenal gland| ascites| bladder| blood| bone| bone marrow| brain| cervix| connective tissue| embryonic tissue| esophagus| eye| heart| intestine| kidney| larynx| liver| lung| lymph| lymph node| mammary gland| mouth| muscle| pancreas| pharynx| placenta| prostate| skin| spleen| stomach| testis| thymus| trachea| uterus| vascular|adrenal tumor| breast (mammary gland) tumor| cervical tumor| chondrosarc…	chr6_dbb_hap3	+	2423447	2429116	NM_001077511	Q9Y242	GO:0006351 // GO:0006357 // GO:0008283 // GO:0006355	transcription, DNA-templated // regulation of transcription from RNA polymerase II promoter // cell proliferation // regulation of transcription, DNA-templated	inferred from electronic annotation // traceable author statement // traceable author statement // inferred from electronic annotation	GO:0005634	nucleus	inferred from electronic annotation	GO:0003700 // GO:0008270 // GO:0046872	sequence-specific DNA binding transcription factor activity // zinc ion binding // metal ion binding	traceable author statement // inferred from electronic annotation // inferred from electronic annotation	---	---	---	---	---	17030560	27	3	main
17033265	7.48918	8.26605	8.17503	7.18564		7.87762	7.68033		NM_001077511	TCF19	transcription factor 19	6p21.3	NM_001077511	RefSeq	Homo sapiens transcription factor 19 (TCF19), transcript variant 2, mRNA.	89	89	24	27	TRUE	Hs.584807	adrenal gland| ascites| bladder| blood| bone| bone marrow| brain| cervix| connective tissue| embryonic tissue| esophagus| eye| heart| intestine| kidney| larynx| liver| lung| lymph| lymph node| mammary gland| mouth| muscle| pancreas| pharynx| placenta| prostate| skin| spleen| stomach| testis| thymus| trachea| uterus| vascular|adrenal tumor| breast (mammary gland) tumor| cervical tumor| chondrosarc…	chr6_mann_hap4	+	2474707	2480336	NM_001077511	Q9Y242	GO:0006351 // GO:0006357 // GO:0008283 // GO:0006355	transcription, DNA-templated // regulation of transcription from RNA polymerase II promoter // cell proliferation // regulation of transcription, DNA-templated	inferred from electronic annotation // traceable author statement // traceable author statement // inferred from electronic annotation	GO:0005634	nucleus	inferred from electronic annotation	GO:0003700 // GO:0008270 // GO:0046872	sequence-specific DNA binding transcription factor activity // zinc ion binding // metal ion binding	traceable author statement // inferred from electronic annotation // inferred from electronic annotation	---	---	---	---	---	17033265	27	3	main
17035356	7.48918	8.26605	8.17503	7.18564		7.87762	7.68033		NM_001077511	TCF19	transcription factor 19	6p21.3	NM_001077511	RefSeq	Homo sapiens transcription factor 19 (TCF19), transcript variant 2, mRNA.	89	89	24	27	TRUE	Hs.584807	adrenal gland| ascites| bladder| blood| bone| bone marrow| brain| cervix| connective tissue| embryonic tissue| esophagus| eye| heart| intestine| kidney| larynx| liver| lung| lymph| lymph node| mammary gland| mouth| muscle| pancreas| pharynx| placenta| prostate| skin| spleen| stomach| testis| thymus| trachea| uterus| vascular|adrenal tumor| breast (mammary gland) tumor| cervical tumor| chondrosarc…	chr6_mcf_hap5	+	2508286	2513915	NM_001077511	Q9Y242	GO:0006351 // GO:0006357 // GO:0008283 // GO:0006355	transcription, DNA-templated // regulation of transcription from RNA polymerase II promoter // cell proliferation // regulation of transcription, DNA-templated	inferred from electronic annotation // traceable author statement // traceable author statement // inferred from electronic annotation	GO:0005634	nucleus	inferred from electronic annotation	GO:0003700 // GO:0008270 // GO:0046872	sequence-specific DNA binding transcription factor activity // zinc ion binding // metal ion binding	traceable author statement // inferred from electronic annotation // inferred from electronic annotation	---	---	---	---	---	17035356	27	3	main
17038044	7.48918	8.26605	8.17503	7.18564		7.87762	7.68033		NM_001077511	TCF19	transcription factor 19	6p21.3	NM_001077511	RefSeq	Homo sapiens transcription factor 19 (TCF19), transcript variant 2, mRNA.	89	89	24	27	TRUE	Hs.584807	adrenal gland| ascites| bladder| blood| bone| bone marrow| brain| cervix| connective tissue| embryonic tissue| esophagus| eye| heart| intestine| kidney| larynx| liver| lung| lymph| lymph node| mammary gland| mouth| muscle| pancreas| pharynx| placenta| prostate| skin| spleen| stomach| testis| thymus| trachea| uterus| vascular|adrenal tumor| breast (mammary gland) tumor| cervical tumor| chondrosarc…	chr6_qbl_hap6	+	2422170	2427844	NM_001077511	Q9Y242	GO:0006351 // GO:0006357 // GO:0008283 // GO:0006355	transcription, DNA-templated // regulation of transcription from RNA polymerase II promoter // cell proliferation // regulation of transcription, DNA-templated	inferred from electronic annotation // traceable author statement // traceable author statement // inferred from electronic annotation	GO:0005634	nucleus	inferred from electronic annotation	GO:0003700 // GO:0008270 // GO:0046872	sequence-specific DNA binding transcription factor activity // zinc ion binding // metal ion binding	traceable author statement // inferred from electronic annotation // inferred from electronic annotation	---	---	---	---	---	17038044	27	3	main
17040632	7.48918	8.26605	8.17503	7.18564		7.87762	7.68033		NM_001077511	TCF19	transcription factor 19	6p21.3	NM_001077511	RefSeq	Homo sapiens transcription factor 19 (TCF19), transcript variant 2, mRNA.	89	89	24	27	TRUE	Hs.584807	adrenal gland| ascites| bladder| blood| bone| bone marrow| brain| cervix| connective tissue| embryonic tissue| esophagus| eye| heart| intestine| kidney| larynx| liver| lung| lymph| lymph node| mammary gland| mouth| muscle| pancreas| pharynx| placenta| prostate| skin| spleen| stomach| testis| thymus| trachea| uterus| vascular|adrenal tumor| breast (mammary gland) tumor| cervical tumor| chondrosarc…	chr6_ssto_hap7	+	2461255	2466929	NM_001077511	Q9Y242	GO:0006351 // GO:0006357 // GO:0008283 // GO:0006355	transcription, DNA-templated // regulation of transcription from RNA polymerase II promoter // cell proliferation // regulation of transcription, DNA-templated	inferred from electronic annotation // traceable author statement // traceable author statement // inferred from electronic annotation	GO:0005634	nucleus	inferred from electronic annotation	GO:0003700 // GO:0008270 // GO:0046872	sequence-specific DNA binding transcription factor activity // zinc ion binding // metal ion binding	traceable author statement // inferred from electronic annotation // inferred from electronic annotation	---	---	---	---	---	17040632	27	3	main
16709268	5.48893	6.65161	4.58334	4.78397		6.07027	4.68366		AB033899	ACSL5	acyl-CoA synthetase long-chain family member 5	10q25.1-q25.2	AB033899	GenBank	Homo sapiens FACL5 mRNA for fatty acid coenzyme A ligase 5, complete cds.	93	68	14	15	FALSE	Hs.11638	ascites| bladder| blood| bone| bone marrow| brain| cervix| connective tissue| embryonic tissue| eye| heart| intestine| kidney| liver| lung| lymph| lymph node| mammary gland| mouth| muscle| nerve| ovary| pancreas| pharynx| placenta| prostate| skin| spleen| stomach| testis| thymus| tonsil| trachea| uterus| vascular| bladder carcinoma| breast (mammary gland) tumor| cervical tumor| chondrosarcoma| co…	chr10	+	114133776	114188138	AB033899	Q9ULC5	GO:0001676 // GO:0001676 // GO:0019432 // GO:0035338 // GO:0044255 // GO:0044281 // GO:2001236 // GO:0006629 // GO:0006631 // GO:0008152	long-chain fatty acid metabolic process // long-chain fatty acid metabolic process // triglyceride biosynthetic process // long-chain fatty-acyl-CoA biosynthetic process // cellular lipid metabolic process // small molecule metabolic process // regulation of extrinsic apoptotic signaling pathway // lipid metabolic process // fatty acid metabolic process // metabolic process	inferred from direct assay // inferred from electronic annotation // traceable author statement // traceable author statement // traceable author statement // traceable author statement // inferred from direct assay // inferred from electronic annotation // inferred from electronic annotation // inferred from electronic annotation	GO:0005634 // GO:0005730 // GO:0005739 // GO:0005741 // GO:0005743 // GO:0005783 // GO:0005789 // GO:0016021 // GO:0005739 // GO:0005783 // GO:0005789 // GO:0016020 // GO:0016020	nucleus // nucleolus // mitochondrion // mitochondrial outer membrane // mitochondrial inner membrane // endoplasmic reticulum // endoplasmic reticulum membrane // integral component of membrane // mitochondrion // endoplasmic reticulum // endoplasmic reticulum membrane // membrane // membrane	inferred from direct assay // inferred from direct assay // inferred from direct assay // inferred from electronic annotation // inferred from electronic annotation // inferred from direct assay // traceable author statement // inferred from electronic annotation // inferred from electronic annotation // inferred from electronic annotation // inferred from electronic annotation // inferred from d…	GO:0004467 // GO:0004467 // GO:0005524 // GO:0000166 // GO:0003824 // GO:0016874	long-chain fatty acid-CoA ligase activity // long-chain fatty acid-CoA ligase activity // ATP binding // nucleotide binding // catalytic activity // ligase activity	inferred from direct assay // inferred from electronic annotation // inferred from electronic annotation // inferred from electronic annotation // inferred from electronic annotation // inferred from electronic annotation	GenMAPP // HumanCyc // HumanCyc // MetaCyc // MetaCyc // MetaCyc // MetaCyc	Fatty_Acid_Degradation // PWY-5136 // FAO-PWY // PWY66-391 // PWY-7288 // PWY-5136 // FAO-PWY	---	---	---	16709268	22	1	main
17077004	10.977	10.3502	11.0065	10.9402		10.6636	10.9733		NM_003068	SNAI2	snail family zinc finger 2	8q11	NM_003068	RefSeq	Homo sapiens snail family zinc finger 2 (SNAI2), mRNA.	90	90	18	20	TRUE	Hs.360174	adrenal gland| bladder| bone| bone marrow| brain| cervix| connective tissue| embryonic tissue| esophagus| eye| heart| intestine| kidney| larynx| liver| lung| mammary gland| mouth| muscle| ovary| pancreas| placenta| prostate| skin| spleen| thymus| uterus| vascular| bladder carcinoma| breast (mammary gland) tumor| cervical tumor| chondrosarcoma| esophageal tumor| germ cell tumor| glioma| head and n…	chr8	-	49830236	49834299	NM_003068	O43623	GO:0000122 // GO:0000122 // GO:0001649 // GO:0001837 // GO:0003198 // GO:0003273 // GO:0006366 // GO:0006933 // GO:0007219 // GO:0007605 // GO:0009790 // GO:0010839 // GO:0010957 // GO:0014032 // GO:0030335 // GO:0032331 // GO:0032642 // GO:0033629 // GO:0035066 // GO:0035414 // GO:0035921 // GO:0043473 // GO:0043518 // GO:0044344 // GO:0045600 // GO:0045667 // GO:0050872 // GO:0060021 // GO:0060…	negative regulation of transcription from RNA polymerase II promoter // negative regulation of transcription from RNA polymerase II promoter // osteoblast differentiation // epithelial to mesenchymal transition // epithelial to mesenchymal transition involved in endocardial cushion formation // cell migration involved in endocardial cushion formation // transcription from RNA polymerase II promot…	inferred from direct assay // inferred from mutant phenotype // inferred from expression pattern // inferred from mutant phenotype // inferred from sequence or structural similarity // inferred from sequence or structural similarity // inferred from electronic annotation // inferred from electronic annotation // inferred from mutant phenotype // inferred from mutant phenotype // inferred from ele…	GO:0000790 // GO:0005634 // GO:0005737 // GO:0005634	nuclear chromatin // nucleus // cytoplasm // nucleus	inferred from direct assay // inferred from direct assay // inferred from electronic annotation // inferred from electronic annotation	GO:0001078 // GO:0003682 // GO:0003705 // GO:0043565 // GO:0046872 // GO:0001078 // GO:0003676 // GO:0003677	RNA polymerase II core promoter proximal region sequence-specific DNA binding transcription factor activity involved in negative regulation of transcription // chromatin binding // RNA polymerase II distal enhancer sequence-specific DNA binding transcription factor activity // sequence-specific DNA binding // metal ion binding // RNA polymerase II core promoter proximal region sequence-specific D…	inferred from direct assay // inferred from electronic annotation // inferred from electronic annotation // inferred from direct assay // inferred from electronic annotation // inferred from electronic annotation // inferred from electronic annotation // inferred from electronic annotation	---	---	---	---	---	17077004	20	1	main
17076726	11.5739	11.6909	11.8276	11.8177		11.6324	11.8226		NM_000930	PLAT	plasminogen activator, tissue	8p12	NM_000930	RefSeq	Homo sapiens plasminogen activator, tissue (PLAT), transcript variant 1, mRNA.	71	71	17	24	TRUE	Hs.491582	adipose tissue| adrenal gland| bone| bone marrow| brain| cervix| connective tissue| ear| embryonic tissue| esophagus| eye| heart| intestine| kidney| larynx| liver| lung| lymph| mammary gland| mouth| muscle| ovary| pancreas| parathyroid| pharynx| placenta| prostate| skin| stomach| testis| thymus| thyroid| trachea| uterus| vascular| bladder carcinoma| breast (mammary gland) tumor| cervical tumor| c…	chr8	-	42032236	42065242	NM_000930	P00750	GO:0001666 // GO:0006464 // GO:0006508 // GO:0007596 // GO:0014909 // GO:0031639 // GO:0035249 // GO:0042730 // GO:0043434 // GO:0045861 // GO:0048008 // GO:0048167 // GO:0051384 // GO:0051591 // GO:0060279 // GO:0006508 // GO:0031639 // GO:0042060	response to hypoxia // cellular protein modification process // proteolysis // blood coagulation // smooth muscle cell migration // plasminogen activation // synaptic transmission, glutamatergic // fibrinolysis // response to peptide hormone // negative regulation of proteolysis // platelet-derived growth factor receptor signaling pathway // regulation of synaptic plasticity // response to glucoc…	inferred from electronic annotation // traceable author statement // inferred from electronic annotation // traceable author statement // inferred from electronic annotation // inferred from direct assay // inferred from electronic annotation // traceable author statement // inferred from electronic annotation // inferred from direct assay // inferred from electronic annotation // inferred from e…	GO:0005576 // GO:0005615 // GO:0005737 // GO:0009986 // GO:0030141 // GO:0031012 // GO:0045177 // GO:0045202 // GO:0070062 // GO:0005576 // GO:0005737	extracellular region // extracellular space // cytoplasm // cell surface // secretory granule // extracellular matrix // apical part of cell // synapse // extracellular vesicular exosome // extracellular region // cytoplasm	traceable author statement // inferred from electronic annotation // inferred from direct assay // inferred from direct assay // inferred from electronic annotation // inferred from direct assay // inferred from electronic annotation // inferred from electronic annotation // inferred from direct assay // inferred from electronic annotation // inferred from electronic annotation	GO:0004252 // GO:0004252 // GO:0005515 // GO:0003824 // GO:0004252 // GO:0008233 // GO:0008236 // GO:0016787	serine-type endopeptidase activity // serine-type endopeptidase activity // protein binding // catalytic activity // serine-type endopeptidase activity // peptidase activity // serine-type peptidase activity // hydrolase activity	inferred from direct assay // traceable author statement // inferred from physical interaction // inferred from electronic annotation // inferred from electronic annotation // inferred from electronic annotation // inferred from electronic annotation // inferred from electronic annotation	GenMAPP	Blood_Clotting_Cascade	---	---	---	17076726	24	1	main
16876431	10.0905	11.1655	9.16029	8.94154		10.628	9.05092		---	---	---	---	ENST00000620022	ENSEMBL	ncrna:novel chromosome:GRCh38:1:146409903:146410062:1 gene:ENSG00000274428 gene_biotype:snRNA transcript_biotype:snRNA	100	100	8	8	TRUE	---	---	chrU	-	544948	545107	---	---	---	---	---	---	---	---	---	---	---	---	---	---	---	---	16876431	8	3	main
16829369	7.19531	8.34454	8.06588	7.35453		7.76993	7.71021		NM_000135	FANCA	Fanconi anemia, complementation group A	16q24.3	NM_000135	RefSeq	Homo sapiens Fanconi anemia, complementation group A (FANCA), transcript variant 1, mRNA.	95	95	38	40	TRUE	Hs.744083	adrenal gland| bladder| blood| bone| brain| cervix| embryonic tissue| eye| intestine| kidney| liver| lung| lymph| lymph node| mammary gland| muscle| ovary| pancreas| placenta| prostate| skin| spleen| stomach| testis| thymus| thyroid| umbilical cord| uterus|adrenal tumor| bladder carcinoma| breast (mammary gland) tumor| cervical tumor| chondrosarcoma| colorectal tumor| gastrointestinal tumor| germ…	chr16	-	89803959	89883065	NM_000135	O15360	GO:0006281 // GO:0006461 // GO:0007140 // GO:0008584 // GO:0008585 // GO:0042127 // GO:0006281 // GO:0006974	DNA repair // protein complex assembly // male meiosis // male gonad development // female gonad development // regulation of cell proliferation // DNA repair // cellular response to DNA damage stimulus	traceable author statement // traceable author statement // inferred from electronic annotation // inferred from electronic annotation // inferred from electronic annotation // inferred from electronic annotation // inferred from electronic annotation // inferred from electronic annotation	GO:0005634 // GO:0005654 // GO:0005730 // GO:0005737 // GO:0043240 // GO:0005634 // GO:0005634 // GO:0005737 // GO:0005737	nucleus // nucleoplasm // nucleolus // cytoplasm // Fanconi anaemia nuclear complex // nucleus // nucleus // cytoplasm // cytoplasm	inferred from direct assay // traceable author statement // inferred from direct assay // inferred from direct assay // inferred from direct assay // inferred from electronic annotation // traceable author statement // inferred from electronic annotation // traceable author statement	GO:0005515	protein binding	inferred from physical interaction	---	---	---	---	---	16829369	40	1	main
16838841	8.26663	8.91372	6.00239	5.55698		8.59018	5.77969		NM_001290212	TSPAN10	tetraspanin 10	17q25.3	NM_001290212	RefSeq	Homo sapiens tetraspanin 10 (TSPAN10), transcript variant 1, mRNA.	78	78	14	18	TRUE	Hs.740811	brain| eye| lymph node| nerve| prostate| skin| uterus| lymphoma| normal| primitive neuroectodermal tumor of the CNS| skin tumor| uterine tumor| fetus| juvenile| adult	chr17	+	79609349	79615779	NM_001290212	Q9H1Z9	GO:0072594	establishment of protein localization to organelle	inferred from direct assay	GO:0016021 // GO:0016020	integral component of membrane // membrane	inferred from electronic annotation // inferred from electronic annotation	GO:0019899	enzyme binding	inferred from physical interaction	---	---	---	---	---	16838841	18	1	main
16944410	10.8292	10.5883	5.10529	4.7514		10.7088	4.92834		NM_001206960	PLA1A	phospholipase A1 member A	3q13.13-q13.2	NM_001206960	RefSeq	Homo sapiens phospholipase A1 member A (PLA1A), transcript variant 2, mRNA.	66	66	23	35	TRUE	Hs.437451	blood| brain| connective tissue| eye| heart| kidney| liver| lung| mammary gland| parathyroid| pharynx| prostate| skin| testis| uterus| breast (mammary gland) tumor| germ cell tumor| leukemia| liver tumor| lung tumor| non-neoplasia| normal| skin tumor| uterine tumor| fetus| juvenile| adult	chr3	+	119316689	119348658	NM_001206960	Q53H76	GO:0006629 // GO:0006658 // GO:0016042 // GO:0006629	lipid metabolic process // phosphatidylserine metabolic process // lipid catabolic process // lipid metabolic process	traceable author statement // traceable author statement // inferred from electronic annotation // inferred from electronic annotation	GO:0070062 // GO:0005576	extracellular vesicular exosome // extracellular region	inferred from direct assay // inferred from electronic annotation	GO:0008970 // GO:0003824 // GO:0016787	phosphatidylcholine 1-acylhydrolase activity // catalytic activity // hydrolase activity	traceable author statement // inferred from electronic annotation // inferred from electronic annotation	---	---	---	---	---	16944410	35	1	main
17052619	6.3073	7.14689	4.71919	4.83264		6.72709	4.77592		ENST00000390394	TRBV20-1	T cell receptor beta variable 20-1	---	ENST00000390394	ENSEMBL	havana_ig_gene:known chromosome:GRCh38:7:142626649:142627399:1 gene:ENSG00000211747 gene_biotype:TR_V_gene transcript_biotype:TR_V_gene	100	100	13	13	TRUE	Hs.728330	blood| heart| lymph node| pharynx| thymus| normal| fetus| adult	chr7	+	142334163	142334913	ENST00000390394	A2NZM1	---	---	---	---	---	---	GO:0005515	protein binding	inferred from electronic annotation	---	---	Pfam	IPR013106	Immunoglobulin V-set domain	17052619	13	1	main
16968697	7.59449	7.99995	8.28331	8.40726		7.79722	8.34529		NM_000297	PKD2	polycystic kidney disease 2 (autosomal dominant)	4q22.1	NM_000297	RefSeq	Homo sapiens polycystic kidney disease 2 (autosomal dominant) (PKD2), mRNA.	85	85	29	34	TRUE	Hs.181272	ascites| bladder| bone| bone marrow| brain| connective tissue| ear| embryonic tissue| eye| heart| kidney| larynx| liver| lung| lymph node| mammary gland| mouth| muscle| ovary| pancreas| parathyroid| pituitary gland| placenta| prostate| skin| stomach| testis| thymus| tonsil| umbilical cord| uterus| vascular| breast (mammary gland) tumor| chondrosarcoma| gastrointestinal tumor| germ cell tumor| gli…	chr4	+	88928799	88998931	NM_000297	Q13563	GO:0001658 // GO:0001889 // GO:0001892 // GO:0001947 // GO:0003127 // GO:0006816 // GO:0006816 // GO:0007050 // GO:0007259 // GO:0007368 // GO:0007507 // GO:0008285 // GO:0021510 // GO:0021915 // GO:0030814 // GO:0031587 // GO:0031659 // GO:0034614 // GO:0035502 // GO:0035725 // GO:0035904 // GO:0042127 // GO:0042994 // GO:0045429 // GO:0045944 // GO:0045944 // GO:0050982 // GO:0050982 // GO:0051…	branching involved in ureteric bud morphogenesis // liver development // embryonic placenta development // heart looping // detection of nodal flow // calcium ion transport // calcium ion transport // cell cycle arrest // JAK-STAT cascade // determination of left/right symmetry // heart development // negative regulation of cell proliferation // spinal cord development // neural tube development …	inferred from expression pattern // inferred from expression pattern // inferred from sequence or structural similarity // inferred from mutant phenotype // inferred from sequence or structural similarity // inferred from direct assay // inferred from sequence or structural similarity // inferred from sequence or structural similarity // inferred from sequence or structural similarity // inferred…	GO:0002133 // GO:0005737 // GO:0005737 // GO:0005783 // GO:0005783 // GO:0005789 // GO:0005886 // GO:0005887 // GO:0005911 // GO:0005929 // GO:0009925 // GO:0030027 // GO:0031512 // GO:0031513 // GO:0031941 // GO:0036064 // GO:0045180 // GO:0060170 // GO:0070062 // GO:0071458 // GO:0071556 // GO:0072686 // GO:0002133 // GO:0005737 // GO:0005783 // GO:0005886 // GO:0005911 // GO:0005929 // GO:0016…	polycystin complex // cytoplasm // cytoplasm // endoplasmic reticulum // endoplasmic reticulum // endoplasmic reticulum membrane // plasma membrane // integral component of plasma membrane // cell-cell junction // cilium // basal plasma membrane // lamellipodium // motile primary cilium // nonmotile primary cilium // filamentous actin // ciliary basal body // basal cortex // ciliary membrane // e…	inferred from sequence or structural similarity // inferred from direct assay // inferred from mutant phenotype // inferred from direct assay // inferred from mutant phenotype // inferred from direct assay // inferred from direct assay // inferred from direct assay // inferred from sequence or structural similarity // inferred from sequence or structural similarity // inferred from direct assay /…	GO:0005102 // GO:0005244 // GO:0005245 // GO:0005248 // GO:0005267 // GO:0005509 // GO:0005515 // GO:0008092 // GO:0022843 // GO:0042802 // GO:0042802 // GO:0042803 // GO:0042805 // GO:0043398 // GO:0044325 // GO:0048763 // GO:0051117 // GO:0051219 // GO:0051371 // GO:0005102 // GO:0005267 // GO:0005509 // GO:0015267 // GO:0042802 // GO:0046872 // GO:0051117 // GO:0051393	receptor binding // voltage-gated ion channel activity // voltage-gated calcium channel activity // voltage-gated sodium channel activity // potassium channel activity // calcium ion binding // protein binding // cytoskeletal protein binding // voltage-gated cation channel activity // identical protein binding // identical protein binding // protein homodimerization activity // actinin binding //…	inferred from physical interaction // inferred from direct assay // inferred from direct assay // inferred from direct assay // inferred from sequence or structural similarity // inferred from sequence or structural similarity // inferred from physical interaction // inferred from direct assay // inferred from direct assay // inferred from physical interaction // inferred from sequence or structu…	---	---	---	---	---	16968697	34	1	main
17122608	5.93921	5.44382	6.85118	6.62753		5.69151	6.73936		XM_005275934	LOC100505498	uncharacterized LOC100505498	---	XM_005275934	RefSeq	PREDICTED: Homo sapiens uncharacterized LOC100505498 (LOC100505498), mRNA.	92	92	24	26	TRUE	Hs.42192	connective tissue| eye| kidney| skin| testis| thymus| normal| soft tissue/muscle tissue tumor| adult	chrU	+	1	629	---	---	---	---	---	---	---	---	---	---	---	---	---	---	---	---	17122608	26	3	rescue
16718263	7.28166	6.61613	5.25185	6.36893		6.9489	5.81039		NM_001013031	SORCS1	sortilin-related VPS10 domain containing receptor 1	10q23-q25	NM_001013031	RefSeq	Homo sapiens sortilin-related VPS10 domain containing receptor 1 (SORCS1), transcript variant 2, mRNA.	100	75	21	21	FALSE	Hs.591915	adrenal gland| brain| connective tissue| ear| embryonic tissue| eye| intestine| kidney| muscle| prostate| germ cell tumor| kidney tumor| normal| primitive neuroectodermal tumor of the CNS| soft tissue/muscle tissue tumor| fetus| infant| adult	chr10	-	108333421	108924466	NM_001013031	Q8WY21	GO:0007218	neuropeptide signaling pathway	non-traceable author statement	GO:0016020 // GO:0016021 // GO:0016020	membrane // integral component of membrane // membrane	inferred from direct assay // inferred from electronic annotation // inferred from electronic annotation	GO:0005515 // GO:0008188	protein binding // neuropeptide receptor activity	inferred from physical interaction // non-traceable author statement	---	---	---	---	---	16718263	28	1	main
16991859	7.23207	8.64522	8.88894	7.89997		7.93865	8.39445		NM_001142556	HMMR	hyaluronan-mediated motility receptor (RHAMM)	5q34	NM_001142556	RefSeq	Homo sapiens hyaluronan-mediated motility receptor (RHAMM) (HMMR), transcript variant 1, mRNA.	86	86	18	21	TRUE	Hs.740467	ascites| bladder| blood| bone marrow| brain| connective tissue| embryonic tissue| esophagus| eye| intestine| kidney| liver| lung| lymph node| mammary gland| mouth| muscle| nerve| ovary| placenta| prostate| salivary gland| skin| stomach| testis| thymus| uterus| vascular| bladder carcinoma| breast (mammary gland) tumor| chondrosarcoma| colorectal tumor| esophageal tumor| gastrointestinal tumor| ger…	chr5	+	162887175	162918951	NM_001142556	O75330	GO:0005975 // GO:0030203 // GO:0030212 // GO:0030214 // GO:0044281	carbohydrate metabolic process // glycosaminoglycan metabolic process // hyaluronan metabolic process // hyaluronan catabolic process // small molecule metabolic process	traceable author statement // traceable author statement // traceable author statement // traceable author statement // traceable author statement	GO:0005737 // GO:0005886 // GO:0009986 // GO:0016020	cytoplasm // plasma membrane // cell surface // membrane	inferred from electronic annotation // traceable author statement // inferred from electronic annotation // inferred from direct assay	GO:0005540	hyaluronic acid binding	inferred from electronic annotation	---	---	---	---	---	16991859	21	1	main
16826160	7.43836	8.07617	8.93223	7.57212		7.75726	8.25218		NM_024745	SHCBP1	SHC SH2-domain binding protein 1	16q11.2	NM_024745	RefSeq	Homo sapiens SHC SH2-domain binding protein 1 (SHCBP1), mRNA.	91	91	20	22	TRUE	Hs.123253	blood| bone| bone marrow| brain| cervix| connective tissue| ear| embryonic tissue| esophagus| intestine| kidney| liver| lung| lymph node| mammary gland| muscle| ovary| placenta| prostate| skin| testis| thymus| trachea| uterus| breast (mammary gland) tumor| cervical tumor| chondrosarcoma| esophageal tumor| germ cell tumor| glioma| leukemia| liver tumor| lung tumor| non-neoplasia| normal| ovarian t…	chr16	-	46614466	46655538	NM_024745	Q8NEM2	GO:0008543 // GO:2000177 // GO:0008543 // GO:2000177	fibroblast growth factor receptor signaling pathway // regulation of neural precursor cell proliferation // fibroblast growth factor receptor signaling pathway // regulation of neural precursor cell proliferation	inferred from sequence or structural similarity // inferred from sequence or structural similarity // inferred from electronic annotation // inferred from electronic annotation	---	---	---	GO:0042169	SH2 domain binding	inferred from electronic annotation	---	---	---	---	---	16826160	22	1	main
16845794	7.53672	8.67483	8.38139	7.74605		8.10578	8.06372		NM_001264573	KIF18B	kinesin family member 18B	17q21.31	NM_001264573	RefSeq	Homo sapiens kinesin family member 18B (KIF18B), transcript variant 2, mRNA.	100	100	19	19	TRUE	Hs.135094	bladder| blood| brain| embryonic tissue| intestine| kidney| liver| lung| lymph| lymph node| muscle| ovary| prostate| testis| uterus| bladder carcinoma| colorectal tumor| gastrointestinal tumor| germ cell tumor| glioma| kidney tumor| leukemia| liver tumor| lymphoma| non-neoplasia| normal| ovarian tumor| prostate cancer| soft tissue/muscle tissue tumor| uterine tumor|embryoid body| blastocyst| fetu…	chr17	-	43003360	43025082	NM_001264573	Q86Y91	GO:0000278 // GO:0007018 // GO:0007019 // GO:0007067 // GO:0008152 // GO:0008152 // GO:0051302 // GO:0007049 // GO:0051301	mitotic cell cycle // microtubule-based movement // microtubule depolymerization // mitotic nuclear division // metabolic process // metabolic process // regulation of cell division // cell cycle // cell division	inferred from direct assay // inferred from electronic annotation // inferred from direct assay // inferred from electronic annotation // inferred from direct assay // inferred from electronic annotation // inferred from direct assay // inferred from electronic annotation // inferred from electronic annotation	GO:0000235 // GO:0005634 // GO:0005730 // GO:0005737 // GO:0005871 // GO:0005886 // GO:0035371 // GO:0005634 // GO:0005737 // GO:0005856 // GO:0005874	astral microtubule // nucleus // nucleolus // cytoplasm // kinesin complex // plasma membrane // microtubule plus-end // nucleus // cytoplasm // cytoskeleton // microtubule	inferred from direct assay // inferred from direct assay // inferred from direct assay // inferred from direct assay // inferred from electronic annotation // inferred from direct assay // inferred from direct assay // inferred from electronic annotation // inferred from electronic annotation // inferred from electronic annotation // inferred from electronic annotation	GO:0003774 // GO:0003777 // GO:0005515 // GO:0005524 // GO:0008017 // GO:0019894 // GO:0000166	motor activity // microtubule motor activity // protein binding // ATP binding // microtubule binding // kinesin binding // nucleotide binding	inferred from direct assay // inferred from electronic annotation // inferred from physical interaction // inferred from electronic annotation // inferred from electronic annotation // inferred from physical interaction // inferred from electronic annotation	---	---	---	---	---	16845794	19	1	main
17121206	6.36602	7.75541	4.47393	4.44744		7.06072	4.46068		NR_026949	LINC00277	long intergenic non-protein coding RNA 277	15q23	NR_026949	RefSeq	Homo sapiens long intergenic non-protein coding RNA 277 (LINC00277), long non-coding RNA.	100	100	23	23	TRUE	Hs.177927	brain| lung| mammary gland| skin| testis| uterus| breast (mammary gland) tumor| lung tumor| normal| primitive neuroectodermal tumor of the CNS| skin tumor| uterine tumor| juvenile| adult	chrU	+	1	1038	NR_026949	A8K809	---	---	---	---	---	---	---	---	---	---	---	---	---	---	17121206	23	3	rescue
16877956	7.59201	8.62642	8.37989	7.71581		8.10921	8.04785		NM_001809	CENPA	centromere protein A	2p23.3	NM_001809	RefSeq	Homo sapiens centromere protein A (CENPA), transcript variant 1, mRNA.	81	81	21	26	TRUE	Hs.1594	adrenal gland| ascites| blood| bone| brain| cervix| connective tissue| embryonic tissue| eye| intestine| kidney| liver| lung| lymph| lymph node| mammary gland| muscle| pancreas| placenta| prostate| salivary gland| skin| stomach| testis| tonsil| uterus|adrenal tumor| breast (mammary gland) tumor| cervical tumor| chondrosarcoma| colorectal tumor| gastrointestinal tumor| germ cell tumor| glioma| hea…	chr2	+	27008865	27023935	NM_001809	P49450	GO:0000132 // GO:0000278 // GO:0006334 // GO:0016032 // GO:0034080 // GO:0051382 // GO:0071459 // GO:0006334	establishment of mitotic spindle orientation // mitotic cell cycle // nucleosome assembly // viral process // centromere-specific nucleosome assembly // kinetochore assembly // protein localization to chromosome, centromeric region // nucleosome assembly	inferred from mutant phenotype // traceable author statement // traceable author statement // inferred from electronic annotation // traceable author statement // inferred from direct assay // inferred from direct assay // inferred from electronic annotation	GO:0000775 // GO:0000778 // GO:0000780 // GO:0000786 // GO:0000939 // GO:0005634 // GO:0005654 // GO:0005829 // GO:0000775 // GO:0000775 // GO:0000776 // GO:0000777 // GO:0005634 // GO:0005634 // GO:0005694	chromosome, centromeric region // condensed nuclear chromosome kinetochore // condensed nuclear chromosome, centromeric region // nucleosome // condensed chromosome inner kinetochore // nucleus // nucleoplasm // cytosol // chromosome, centromeric region // chromosome, centromeric region // kinetochore // condensed chromosome kinetochore // nucleus // nucleus // chromosome	inferred from direct assay // inferred from direct assay // inferred from direct assay // inferred from electronic annotation // inferred from electronic annotation // inferred from direct assay // traceable author statement // traceable author statement // inferred from electronic annotation // traceable author statement // inferred from electronic annotation // inferred from electronic annotati…	GO:0003677 // GO:0003682 // GO:0005515 // GO:0046982	DNA binding // chromatin binding // protein binding // protein heterodimerization activity	inferred from electronic annotation // traceable author statement // inferred from physical interaction // inferred from electronic annotation	---	---	---	---	---	16877956	26	1	main
16802519	9.16262	10.1669	9.71535	8.58179		9.66478	9.14857		NM_001281301	KIF23	kinesin family member 23	15q23	NM_001281301	RefSeq	Homo sapiens kinesin family member 23 (KIF23), transcript variant 3, mRNA.	60	60	15	25	TRUE	Hs.270845	ascites| blood| bone| bone marrow| brain| cervix| connective tissue| embryonic tissue| eye| heart| intestine| kidney| liver| lymph| lymph node| mammary gland| mouth| muscle| ovary| pancreas| pharynx| placenta| prostate| skin| stomach| testis| thymus| trachea| uterus| breast (mammary gland) tumor| cervical tumor| chondrosarcoma| colorectal tumor| gastrointestinal tumor| germ cell tumor| glioma| he…	chr15	+	69706585	69740764	NM_001281301	Q02241	GO:0000022 // GO:0000278 // GO:0000910 // GO:0007018 // GO:0007596 // GO:0008152 // GO:0008152 // GO:0019886 // GO:0032467 // GO:0051256 // GO:0007018 // GO:0007049 // GO:0007067 // GO:0051301	mitotic spindle elongation // mitotic cell cycle // cytokinesis // microtubule-based movement // blood coagulation // metabolic process // metabolic process // antigen processing and presentation of exogenous peptide antigen via MHC class II // positive regulation of cytokinesis // spindle midzone assembly involved in mitosis // microtubule-based movement // cell cycle // mitotic nuclear division…	traceable author statement // traceable author statement // inferred from mutant phenotype // traceable author statement // traceable author statement // inferred from electronic annotation // traceable author statement // traceable author statement // inferred from mutant phenotype // inferred from mutant phenotype // inferred from electronic annotation // inferred from electronic annotation // …	GO:0005634 // GO:0005654 // GO:0005730 // GO:0005813 // GO:0005819 // GO:0005829 // GO:0005871 // GO:0005874 // GO:0030496 // GO:0045171 // GO:0072686 // GO:0097149 // GO:0005634 // GO:0005737 // GO:0005819 // GO:0005819 // GO:0005856 // GO:0005871 // GO:0030496	nucleus // nucleoplasm // nucleolus // centrosome // spindle // cytosol // kinesin complex // microtubule // midbody // intercellular bridge // mitotic spindle // centralspindlin complex // nucleus // cytoplasm // spindle // spindle // cytoskeleton // kinesin complex // midbody	inferred from direct assay // traceable author statement // inferred from direct assay // inferred from direct assay // inferred from direct assay // traceable author statement // inferred from electronic annotation // inferred from electronic annotation // inferred from direct assay // inferred from electronic annotation // inferred from direct assay // inferred from direct assay // inferred fro…	GO:0003777 // GO:0005515 // GO:0005524 // GO:0008017 // GO:0000166 // GO:0003777 // GO:0008017	microtubule motor activity // protein binding // ATP binding // microtubule binding // nucleotide binding // microtubule motor activity // microtubule binding	inferred from electronic annotation // inferred from physical interaction // inferred from electronic annotation // inferred from direct assay // inferred from electronic annotation // traceable author statement // inferred from electronic annotation	---	---	---	---	---	16802519	25	1	main
17016509	5.62215	7.26399	4.61679	4.70365		6.44307	4.66022		---	---	---	---	---	---	---	---	---	---	---	---	---	---	chr6	-	27858093	27858588	---	---	---	---	---	---	---	---	---	---	---	---	---	---	---	---	17016509	9	3	main
16911338	7.20411	8.05644	7.39764	7.0644		7.63028	7.23102		NM_000933	PLCB4	phospholipase C, beta 4	20p12	NM_000933	RefSeq	Homo sapiens phospholipase C, beta 4 (PLCB4), transcript variant 1, mRNA.	91	91	32	35	TRUE	Hs.472101	ascites| bladder| bone| brain| connective tissue| ear| embryonic tissue| eye| heart| intestine| kidney| liver| lung| mammary gland| mouth| muscle| nerve| pancreas| placenta| prostate| salivary gland| skin| stomach| testis| thymus| thyroid| trachea| uterus| breast (mammary gland) tumor| chondrosarcoma| colorectal tumor| gastrointestinal tumor| germ cell tumor| head and neck tumor| kidney tumor| le…	chr20	+	9049410	9461889	NM_000933	Q15147	GO:0016042 // GO:0035556 // GO:0043647 // GO:0044281 // GO:0006629 // GO:0007165	lipid catabolic process // intracellular signal transduction // inositol phosphate metabolic process // small molecule metabolic process // lipid metabolic process // signal transduction	inferred from electronic annotation // inferred from electronic annotation // traceable author statement // traceable author statement // inferred from electronic annotation // inferred from electronic annotation	GO:0005634 // GO:0005790 // GO:0005829 // GO:0014069 // GO:0030425	nucleus // smooth endoplasmic reticulum // cytosol // postsynaptic density // dendrite	inferred from electronic annotation // inferred from electronic annotation // traceable author statement // inferred from electronic annotation // inferred from electronic annotation	GO:0004435 // GO:0004629 // GO:0004871 // GO:0005509 // GO:0008081 // GO:0016787	phosphatidylinositol phospholipase C activity // phospholipase C activity // signal transducer activity // calcium ion binding // phosphoric diester hydrolase activity // hydrolase activity	inferred from electronic annotation // traceable author statement // inferred from electronic annotation // inferred from electronic annotation // inferred from electronic annotation // inferred from electronic annotation	HumanCyc	LIPASYN-PWY	---	---	---	16911338	35	1	main
16957715	8.03051	8.74433	7.2308	7.61884		8.38742	7.42482		NM_001015887	IGSF11	immunoglobulin superfamily, member 11	3q13.32	NM_001015887	RefSeq	Homo sapiens immunoglobulin superfamily, member 11 (IGSF11), transcript variant 2, mRNA.	55	55	16	29	TRUE	Hs.112873	adrenal gland| brain| embryonic tissue| eye| kidney| mammary gland| nerve| ovary| pancreas| skin| testis| breast (mammary gland) tumor| germ cell tumor| glioma| non-neoplasia| normal| ovarian tumor| skin tumor| soft tissue/muscle tissue tumor| fetus| juvenile| adult	chr3	-	118619404	118864915	NM_001015887	Q5DX21	GO:0007155 // GO:0040008	cell adhesion // regulation of growth	inferred from electronic annotation // inferred from electronic annotation	GO:0005886 // GO:0016021 // GO:0070062 // GO:0016020	plasma membrane // integral component of membrane // extracellular vesicular exosome // membrane	inferred from electronic annotation // inferred from electronic annotation // inferred from direct assay // inferred from electronic annotation	---	---	---	---	---	---	---	---	16957715	29	1	main
16751190	5.96664	6.43014	3.87216	3.93158		6.19839	3.90187		NM_014033	METTL7A	methyltransferase like 7A	12q13.12	NM_014033	RefSeq	Homo sapiens methyltransferase like 7A (METTL7A), mRNA.	100	90	19	19	FALSE	Hs.744021	adipose tissue| adrenal gland| bladder| blood| brain| connective tissue| eye| heart| intestine| kidney| larynx| liver| lung| lymph| lymph node| mammary gland| mouth| pancreas| parathyroid| pharynx| pituitary gland| placenta| prostate| salivary gland| spleen| stomach| testis| thymus| thyroid| trachea| uterus| vascular| breast (mammary gland) tumor| chondrosarcoma| colorectal tumor| gastrointestina…	chr12	+	51317255	51326300	NM_014033	Q9H8H3	GO:0032259 // GO:0008152	methylation // metabolic process	inferred from electronic annotation // inferred from electronic annotation	GO:0005783 // GO:0005811 // GO:0016020 // GO:0070062	endoplasmic reticulum // lipid particle // membrane // extracellular vesicular exosome	inferred from electronic annotation // inferred from electronic annotation // inferred from electronic annotation // inferred from direct assay	GO:0008168 // GO:0016740	methyltransferase activity // transferase activity	inferred from electronic annotation // inferred from electronic annotation	---	---	---	---	---	16751190	21	1	main
16912192	6.67636	7.68377	7.73994	6.63613		7.18007	7.18803		NM_021067	GINS1	GINS complex subunit 1 (Psf1 homolog)	20p11.21	NM_021067	RefSeq	Homo sapiens GINS complex subunit 1 (Psf1 homolog) (GINS1), mRNA.	75	75	18	24	TRUE	Hs.658464	bladder| blood| bone| brain| cervix| embryonic tissue| eye| intestine| kidney| liver| lung| lymph| lymph node| mammary gland| ovary| placenta| prostate| skin| testis| uterus| vascular| breast (mammary gland) tumor| cervical tumor| chondrosarcoma| colorectal tumor| germ cell tumor| glioma| kidney tumor| leukemia| liver tumor| lung tumor| lymphoma| non-neoplasia| normal| primitive neuroectodermal t…	chr20	+	25388323	25433264	NM_021067	Q14691	GO:0000278 // GO:0001833 // GO:0006271 // GO:0006260	mitotic cell cycle // inner cell mass cell proliferation // DNA strand elongation involved in DNA replication // DNA replication	traceable author statement // inferred from electronic annotation // traceable author statement // inferred from electronic annotation	GO:0005634 // GO:0005654 // GO:0005737 // GO:0005634 // GO:0005737	nucleus // nucleoplasm // cytoplasm // nucleus // cytoplasm	inferred from direct assay // traceable author statement // inferred from direct assay // inferred from electronic annotation // inferred from electronic annotation	---	---	---	---	---	---	---	---	16912192	24	1	main
16781591	4.55412	4.75322	3.55076	3.58288		4.65367	3.56682		NM_005615	RNASE6	ribonuclease, RNase A family, k6	14q11.2	NM_005615	RefSeq	Homo sapiens ribonuclease, RNase A family, k6 (RNASE6), mRNA.	100	100	20	20	FALSE	Hs.23262	adrenal gland| bone| brain| connective tissue| eye| intestine| kidney| lung| lymph node| mammary gland| ovary| pancreas| pharynx| placenta| prostate| spleen| testis| tonsil| uterus| vascular|adrenal tumor| chondrosarcoma| germ cell tumor| glioma| kidney tumor| leukemia| non-neoplasia| normal| ovarian tumor| pancreatic tumor| uterine tumor| fetus| adult	chr14	+	21249210	21250626	NM_005615	Q93091	GO:0006401 // GO:0006952 // GO:0090501 // GO:0090502 // GO:0090305 // GO:0008152	RNA catabolic process // defense response // RNA phosphodiester bond hydrolysis // RNA phosphodiester bond hydrolysis, endonucleolytic // nucleic acid phosphodiester bond hydrolysis // metabolic process	traceable author statement // traceable author statement // traceable author statement // inferred from electronic annotation // inferred from electronic annotation // inferred from electronic annotation	GO:0005576 // GO:0070062 // GO:0005576	extracellular region // extracellular vesicular exosome // extracellular region	traceable author statement // inferred from direct assay // inferred from electronic annotation	GO:0003676 // GO:0004540 // GO:0016892 // GO:0004518 // GO:0004519 // GO:0016787	nucleic acid binding // ribonuclease activity // endoribonuclease activity, producing 3'-phosphomonoesters // nuclease activity // endonuclease activity // hydrolase activity	inferred from electronic annotation // traceable author statement // inferred from electronic annotation // inferred from electronic annotation // inferred from electronic annotation // inferred from electronic annotation	---	---	---	---	---	16781591	20	1	main
17016956	6.94471	7.81703	7.30266	6.60065		7.38087	6.95166		NM_007243	NRM	nurim (nuclear envelope membrane protein)	6p21.33	NM_007243	RefSeq	Homo sapiens nurim (nuclear envelope membrane protein) (NRM), transcript variant 1, mRNA.	78	78	21	27	TRUE	Hs.519993	ascites| blood| brain| cervix| connective tissue| embryonic tissue| eye| intestine| kidney| liver| lung| lymph| lymph node| mammary gland| muscle| ovary| pancreas| placenta| prostate| stomach| testis| tonsil| uterus| breast (mammary gland) tumor| cervical tumor| colorectal tumor| gastrointestinal tumor| germ cell tumor| glioma| kidney tumor| leukemia| liver tumor| lung tumor| lymphoma| non-neopla…	chr6	-	30655824	30659197	NM_007243	Q8IXM6	GO:0008150	biological_process	no biological data available	GO:0005635 // GO:0005637 // GO:0016021 // GO:0005634 // GO:0016020 // GO:0016020	nuclear envelope // nuclear inner membrane // integral component of membrane // nucleus // membrane // membrane	inferred from direct assay // inferred from electronic annotation // inferred from electronic annotation // inferred from electronic annotation // inferred from direct assay // inferred from electronic annotation	GO:0003674	molecular_function	no biological data available	---	---	---	---	---	17016956	27	3	main
17026696	6.94471	7.81703	7.30266	6.60065		7.38087	6.95166		NM_007243	NRM	nurim (nuclear envelope membrane protein)	6p21.33	NM_007243	RefSeq	Homo sapiens nurim (nuclear envelope membrane protein) (NRM), transcript variant 1, mRNA.	78	78	21	27	TRUE	Hs.519993	ascites| blood| brain| cervix| connective tissue| embryonic tissue| eye| intestine| kidney| liver| lung| lymph| lymph node| mammary gland| muscle| ovary| pancreas| placenta| prostate| stomach| testis| tonsil| uterus| breast (mammary gland) tumor| cervical tumor| colorectal tumor| gastrointestinal tumor| germ cell tumor| glioma| kidney tumor| leukemia| liver tumor| lung tumor| lymphoma| non-neopla…	chr6_apd_hap1	-	1967470	1970843	NM_007243	Q8IXM6	GO:0008150	biological_process	no biological data available	GO:0005635 // GO:0005637 // GO:0016021 // GO:0005634 // GO:0016020 // GO:0016020	nuclear envelope // nuclear inner membrane // integral component of membrane // nucleus // membrane // membrane	inferred from direct assay // inferred from electronic annotation // inferred from electronic annotation // inferred from electronic annotation // inferred from direct assay // inferred from electronic annotation	GO:0003674	molecular_function	no biological data available	---	---	---	---	---	17026696	27	3	main
17028847	6.94471	7.81703	7.30266	6.60065		7.38087	6.95166		NM_007243	NRM	nurim (nuclear envelope membrane protein)	6p21.33	NM_007243	RefSeq	Homo sapiens nurim (nuclear envelope membrane protein) (NRM), transcript variant 1, mRNA.	78	78	21	27	TRUE	Hs.519993	ascites| blood| brain| cervix| connective tissue| embryonic tissue| eye| intestine| kidney| liver| lung| lymph| lymph node| mammary gland| muscle| ovary| pancreas| placenta| prostate| stomach| testis| tonsil| uterus| breast (mammary gland) tumor| cervical tumor| colorectal tumor| gastrointestinal tumor| germ cell tumor| glioma| kidney tumor| leukemia| liver tumor| lung tumor| lymphoma| non-neopla…	chr6_cox_hap2	-	2167897	2171270	NM_007243	Q8IXM6	GO:0008150	biological_process	no biological data available	GO:0005635 // GO:0005637 // GO:0016021 // GO:0005634 // GO:0016020 // GO:0016020	nuclear envelope // nuclear inner membrane // integral component of membrane // nucleus // membrane // membrane	inferred from direct assay // inferred from electronic annotation // inferred from electronic annotation // inferred from electronic annotation // inferred from direct assay // inferred from electronic annotation	GO:0003674	molecular_function	no biological data available	---	---	---	---	---	17028847	27	3	main
17031625	6.94471	7.81703	7.30266	6.60065		7.38087	6.95166		NM_007243	NRM	nurim (nuclear envelope membrane protein)	6p21.33	NM_007243	RefSeq	Homo sapiens nurim (nuclear envelope membrane protein) (NRM), transcript variant 1, mRNA.	78	78	21	27	TRUE	Hs.519993	ascites| blood| brain| cervix| connective tissue| embryonic tissue| eye| intestine| kidney| liver| lung| lymph| lymph node| mammary gland| muscle| ovary| pancreas| placenta| prostate| stomach| testis| tonsil| uterus| breast (mammary gland) tumor| cervical tumor| colorectal tumor| gastrointestinal tumor| germ cell tumor| glioma| kidney tumor| leukemia| liver tumor| lung tumor| lymphoma| non-neopla…	chr6_dbb_hap3	-	1949486	1952859	NM_007243	Q8IXM6	GO:0008150	biological_process	no biological data available	GO:0005635 // GO:0005637 // GO:0016021 // GO:0005634 // GO:0016020 // GO:0016020	nuclear envelope // nuclear inner membrane // integral component of membrane // nucleus // membrane // membrane	inferred from direct assay // inferred from electronic annotation // inferred from electronic annotation // inferred from electronic annotation // inferred from direct assay // inferred from electronic annotation	GO:0003674	molecular_function	no biological data available	---	---	---	---	---	17031625	27	3	main
17034080	6.94471	7.81703	7.30266	6.60065		7.38087	6.95166		NM_007243	NRM	nurim (nuclear envelope membrane protein)	6p21.33	NM_007243	RefSeq	Homo sapiens nurim (nuclear envelope membrane protein) (NRM), transcript variant 1, mRNA.	78	78	21	27	TRUE	Hs.519993	ascites| blood| brain| cervix| connective tissue| embryonic tissue| eye| intestine| kidney| liver| lung| lymph| lymph node| mammary gland| muscle| ovary| pancreas| placenta| prostate| stomach| testis| tonsil| uterus| breast (mammary gland) tumor| cervical tumor| colorectal tumor| gastrointestinal tumor| germ cell tumor| glioma| kidney tumor| leukemia| liver tumor| lung tumor| lymphoma| non-neopla…	chr6_mann_hap4	-	2003920	2007293	NM_007243	Q8IXM6	GO:0008150	biological_process	no biological data available	GO:0005635 // GO:0005637 // GO:0016021 // GO:0005634 // GO:0016020 // GO:0016020	nuclear envelope // nuclear inner membrane // integral component of membrane // nucleus // membrane // membrane	inferred from direct assay // inferred from electronic annotation // inferred from electronic annotation // inferred from electronic annotation // inferred from direct assay // inferred from electronic annotation	GO:0003674	molecular_function	no biological data available	---	---	---	---	---	17034080	27	3	main
17036347	6.94471	7.81703	7.30266	6.60065		7.38087	6.95166		NM_007243	NRM	nurim (nuclear envelope membrane protein)	6p21.33	NM_007243	RefSeq	Homo sapiens nurim (nuclear envelope membrane protein) (NRM), transcript variant 1, mRNA.	78	78	21	27	TRUE	Hs.519993	ascites| blood| brain| cervix| connective tissue| embryonic tissue| eye| intestine| kidney| liver| lung| lymph| lymph node| mammary gland| muscle| ovary| pancreas| placenta| prostate| stomach| testis| tonsil| uterus| breast (mammary gland) tumor| cervical tumor| colorectal tumor| gastrointestinal tumor| germ cell tumor| glioma| kidney tumor| leukemia| liver tumor| lung tumor| lymphoma| non-neopla…	chr6_mcf_hap5	-	2037709	2041082	NM_007243	Q8IXM6	GO:0008150	biological_process	no biological data available	GO:0005635 // GO:0005637 // GO:0016021 // GO:0005634 // GO:0016020 // GO:0016020	nuclear envelope // nuclear inner membrane // integral component of membrane // nucleus // membrane // membrane	inferred from direct assay // inferred from electronic annotation // inferred from electronic annotation // inferred from electronic annotation // inferred from direct assay // inferred from electronic annotation	GO:0003674	molecular_function	no biological data available	---	---	---	---	---	17036347	27	3	main
17039123	6.94471	7.81703	7.30266	6.60065		7.38087	6.95166		NM_007243	NRM	nurim (nuclear envelope membrane protein)	6p21.33	NM_007243	RefSeq	Homo sapiens nurim (nuclear envelope membrane protein) (NRM), transcript variant 1, mRNA.	78	78	21	27	TRUE	Hs.519993	ascites| blood| brain| cervix| connective tissue| embryonic tissue| eye| intestine| kidney| liver| lung| lymph| lymph node| mammary gland| muscle| ovary| pancreas| placenta| prostate| stomach| testis| tonsil| uterus| breast (mammary gland) tumor| cervical tumor| colorectal tumor| gastrointestinal tumor| germ cell tumor| glioma| kidney tumor| leukemia| liver tumor| lung tumor| lymphoma| non-neopla…	chr6_qbl_hap6	-	1948757	1952130	NM_007243	Q8IXM6	GO:0008150	biological_process	no biological data available	GO:0005635 // GO:0005637 // GO:0016021 // GO:0005634 // GO:0016020 // GO:0016020	nuclear envelope // nuclear inner membrane // integral component of membrane // nucleus // membrane // membrane	inferred from direct assay // inferred from electronic annotation // inferred from electronic annotation // inferred from electronic annotation // inferred from direct assay // inferred from electronic annotation	GO:0003674	molecular_function	no biological data available	---	---	---	---	---	17039123	27	3	main
17046654	4.22941	4.23423	4.54752	4.23452		4.23182	4.39102		ENST00000410432	RNU6-96P	RNA, U6 small nuclear 96, pseudogene	---	ENST00000410432	ENSEMBL	ncrna:known chromosome:GRCh38:7:66395191:66395286:1 gene:ENSG00000222364 gene_biotype:snRNA transcript_biotype:snRNA	100	100	12	12	TRUE	---	---	chr7	+	65860178	65860273	---	---	---	---	---	---	---	---	---	---	---	---	---	---	---	---	17046654	12	3	main
16686271	9.47601	10.3906	7.32417	7.27181		9.93328	7.29799		NR_002753	RNU5F-1	RNA, U5F small nuclear 1	1p34.1	NR_002753	RefSeq	Homo sapiens RNA, U5F small nuclear 1 (RNU5F-1), small nuclear RNA.	100	100	10	10	FALSE	---	---	chr1	-	45187458	45187574	---	---	---	---	---	---	---	---	---	---	---	---	---	---	---	---	16686271	10	3	main
16688339	7.38028	7.88808	8.04575	8.3772		7.63418	8.21147		NM_001002292	WLS	wntless Wnt ligand secretion mediator	1p31.3	NM_001002292	RefSeq	Homo sapiens wntless Wnt ligand secretion mediator (WLS), transcript variant 2, mRNA.	100	53	10	10	FALSE	Hs.647659	adipose tissue| adrenal gland| ascites| bladder| blood| bone| bone marrow| brain| cervix| connective tissue| ear| embryonic tissue| esophagus| eye| heart| intestine| kidney| liver| lung| mammary gland| mouth| muscle| ovary| parathyroid| pharynx| placenta| prostate| salivary gland| skin| spleen| stomach| testis| thymus| trachea| umbilical cord| uterus| vascular|adrenal tumor| bladder carcinoma| br…	chr1	-	68564142	68698803	NM_001002292	Q5T9L3	GO:0001707 // GO:0009948 // GO:0016055 // GO:0043123 // GO:0090263 // GO:0007275	mesoderm formation // anterior/posterior axis specification // Wnt signaling pathway // positive regulation of I-kappaB kinase/NF-kappaB signaling // positive regulation of canonical Wnt signaling pathway // multicellular organismal development	inferred from electronic annotation // inferred from electronic annotation // inferred from electronic annotation // inferred from sequence or structural similarity // inferred from mutant phenotype // inferred from electronic annotation	GO:0000139 // GO:0005886 // GO:0016021 // GO:0030659 // GO:0031901 // GO:0000139 // GO:0005794 // GO:0016020 // GO:0031410	Golgi membrane // plasma membrane // integral component of membrane // cytoplasmic vesicle membrane // early endosome membrane // Golgi membrane // Golgi apparatus // membrane // cytoplasmic vesicle	traceable author statement // traceable author statement // inferred from electronic annotation // inferred from electronic annotation // traceable author statement // inferred from electronic annotation // inferred from electronic annotation // inferred from electronic annotation // inferred from electronic annotation	GO:0004871 // GO:0005515 // GO:0017147	signal transducer activity // protein binding // Wnt-protein binding	inferred from sequence or structural similarity // inferred from physical interaction // inferred from electronic annotation	---	---	---	---	---	16688339	19	1	main
17010760	9.17412	9.20481	10.6527	10.1182		9.18946	10.3855		NM_001204813	NT5E	5-nucleotidase, ecto (CD73)	6q14-q21	NM_001204813	RefSeq	Homo sapiens 5-nucleotidase, ecto (CD73) (NT5E), transcript variant 2, mRNA.	69	69	20	29	TRUE	Hs.153952	bladder| blood| bone| bone marrow| brain| cervix| connective tissue| embryonic tissue| esophagus| eye| heart| intestine| kidney| liver| lung| lymph node| mammary gland| mouth| muscle| ovary| pancreas| pituitary gland| placenta| prostate| skin| spleen| stomach| testis| thymus| thyroid| trachea| uterus| vascular| breast (mammary gland) tumor| cervical tumor| chondrosarcoma| colorectal tumor| gastro…	chr6	+	86159302	86205509	NM_001204813	P21589	GO:0006144 // GO:0006195 // GO:0006196 // GO:0006206 // GO:0006259 // GO:0016311 // GO:0016311 // GO:0016311 // GO:0044281 // GO:0046086 // GO:0046135 // GO:0050728 // GO:0055086 // GO:0009166 // GO:0016311	purine nucleobase metabolic process // purine nucleotide catabolic process // AMP catabolic process // pyrimidine nucleobase metabolic process // DNA metabolic process // dephosphorylation // dephosphorylation // dephosphorylation // small molecule metabolic process // adenosine biosynthetic process // pyrimidine nucleoside catabolic process // negative regulation of inflammatory response // nucl…	traceable author statement // traceable author statement // inferred from electronic annotation // traceable author statement // traceable author statement // not recorded // inferred from electronic annotation // traceable author statement // traceable author statement // inferred from electronic annotation // traceable author statement // inferred from electronic annotation // traceable author …	GO:0005737 // GO:0005886 // GO:0005886 // GO:0016020 // GO:0031225 // GO:0070062 // GO:0005886 // GO:0016020	cytoplasm // plasma membrane // plasma membrane // membrane // anchored component of membrane // extracellular vesicular exosome // plasma membrane // membrane	inferred from direct assay // inferred from direct assay // traceable author statement // traceable author statement // inferred from electronic annotation // inferred from direct assay // inferred from electronic annotation // inferred from electronic annotation	GO:0000166 // GO:0008253 // GO:0046872 // GO:0008253 // GO:0008253 // GO:0008253 // GO:0016787 // GO:0016788	nucleotide binding // 5'-nucleotidase activity // metal ion binding // 5'-nucleotidase activity // 5'-nucleotidase activity // 5'-nucleotidase activity // hydrolase activity // hydrolase activity, acting on ester bonds	inferred from electronic annotation // not recorded // inferred from electronic annotation // --- // inferred from electronic annotation // traceable author statement // inferred from electronic annotation // inferred from electronic annotation	---	---	---	---	---	17010760	29	1	main
16966855	9.34858	7.8151	4.45693	5.05136		8.58184	4.75414		NM_000222	KIT	v-kit Hardy-Zuckerman 4 feline sarcoma viral oncogene homolog	4q12	NM_000222	RefSeq	Homo sapiens v-kit Hardy-Zuckerman 4 feline sarcoma viral oncogene homolog (KIT), transcript variant 1, mRNA.	84	84	16	19	TRUE	Hs.479754	adipose tissue| bladder| brain| connective tissue| ear| embryonic tissue| eye| heart| intestine| kidney| liver| lung| mammary gland| muscle| nerve| ovary| pancreas| placenta| skin| spleen| testis| thymus| trachea| umbilical cord| uterus| bladder carcinoma| breast (mammary gland) tumor| chondrosarcoma| colorectal tumor| germ cell tumor| glioma| kidney tumor| non-neoplasia| normal| ovarian tumor| p…	chr4	+	55524085	55606881	NM_000222	P10721	GO:0000187 // GO:0001541 // GO:0002318 // GO:0002320 // GO:0002327 // GO:0002371 // GO:0002551 // GO:0006687 // GO:0006954 // GO:0007165 // GO:0007173 // GO:0007283 // GO:0007283 // GO:0007286 // GO:0008284 // GO:0008354 // GO:0008360 // GO:0008542 // GO:0008543 // GO:0008584 // GO:0010628 // GO:0010863 // GO:0014068 // GO:0018108 // GO:0019221 // GO:0019827 // GO:0023014 // GO:0023014 // GO:0030…	activation of MAPK activity // ovarian follicle development // myeloid progenitor cell differentiation // lymphoid progenitor cell differentiation // immature B cell differentiation // dendritic cell cytokine production // mast cell chemotaxis // glycosphingolipid metabolic process // inflammatory response // signal transduction // epidermal growth factor receptor signaling pathway // spermatogen…	inferred from direct assay // inferred from sequence or structural similarity // inferred from electronic annotation // inferred from electronic annotation // inferred from sequence or structural similarity // inferred from sequence or structural similarity // inferred from direct assay // inferred from electronic annotation // inferred from sequence or structural similarity // traceable author s…	GO:0001669 // GO:0005615 // GO:0005886 // GO:0009897 // GO:0009898 // GO:0016021 // GO:0042629 // GO:0005737 // GO:0005886 // GO:0009986 // GO:0016020	acrosomal vesicle // extracellular space // plasma membrane // external side of plasma membrane // cytoplasmic side of plasma membrane // integral component of membrane // mast cell granule // cytoplasm // plasma membrane // cell surface // membrane	inferred from electronic annotation // inferred from direct assay // traceable author statement // inferred from electronic annotation // inferred from electronic annotation // inferred from electronic annotation // inferred from mutant phenotype // inferred from electronic annotation // inferred from electronic annotation // inferred from electronic annotation // inferred from electronic annotat…	GO:0002020 // GO:0004713 // GO:0004714 // GO:0004716 // GO:0005020 // GO:0005515 // GO:0005524 // GO:0019955 // GO:0042803 // GO:0046872 // GO:0000166 // GO:0004672 // GO:0004713 // GO:0004714 // GO:0004716 // GO:0016301 // GO:0016740 // GO:0016772 // GO:0019955	protease binding // protein tyrosine kinase activity // transmembrane receptor protein tyrosine kinase activity // receptor signaling protein tyrosine kinase activity // stem cell factor receptor activity // protein binding // ATP binding // cytokine binding // protein homodimerization activity // metal ion binding // nucleotide binding // protein kinase activity // protein tyrosine kinase activi…	inferred from electronic annotation // traceable author statement // inferred from direct assay // inferred from electronic annotation // inferred from electronic annotation // inferred from physical interaction // inferred from electronic annotation // inferred from direct assay // inferred from physical interaction // inferred from electronic annotation // inferred from electronic annotation //…	---	---	---	---	---	16966855	19	1	main
17050154	6.19088	6.15527	7.78938	6.95775		6.17307	7.37357		NM_002736	PRKAR2B	protein kinase, cAMP-dependent, regulatory, type II, beta	7q22	NM_002736	RefSeq	Homo sapiens protein kinase, cAMP-dependent, regulatory, type II, beta (PRKAR2B), mRNA.	84	84	21	25	TRUE	Hs.433068	adipose tissue| adrenal gland| blood| bone| bone marrow| brain| embryonic tissue| eye| heart| intestine| kidney| larynx| lung| lymph| lymph node| mammary gland| nerve| ovary| pancreas| parathyroid| pituitary gland| placenta| prostate| salivary gland| skin| stomach| testis| trachea| umbilical cord| vascular|adrenal tumor| breast (mammary gland) tumor| gastrointestinal tumor| germ cell tumor| gliom…	chr7	+	106685094	106802256	NM_002736	P31323	GO:0000086 // GO:0000278 // GO:0006112 // GO:0006631 // GO:0006833 // GO:0007165 // GO:0007173 // GO:0007202 // GO:0007596 // GO:0007612 // GO:0008543 // GO:0034199 // GO:0035556 // GO:0044281 // GO:0045087 // GO:0048011 // GO:0050796 // GO:0055085 // GO:0071377 // GO:2000480 // GO:0001932 // GO:0016310 // GO:0045859	G2/M transition of mitotic cell cycle // mitotic cell cycle // energy reserve metabolic process // fatty acid metabolic process // water transport // signal transduction // epidermal growth factor receptor signaling pathway // activation of phospholipase C activity // blood coagulation // learning // fibroblast growth factor receptor signaling pathway // activation of protein kinase A activity //…	traceable author statement // traceable author statement // traceable author statement // inferred from electronic annotation // traceable author statement // traceable author statement // traceable author statement // traceable author statement // traceable author statement // inferred from electronic annotation // traceable author statement // traceable author statement // traceable author stat…	GO:0005737 // GO:0005813 // GO:0005829 // GO:0005886 // GO:0005952 // GO:0005737 // GO:0005886 // GO:0016020	cytoplasm // centrosome // cytosol // plasma membrane // cAMP-dependent protein kinase complex // cytoplasm // plasma membrane // membrane	inferred from direct assay // inferred from direct assay // traceable author statement // inferred from direct assay // inferred from electronic annotation // inferred from electronic annotation // inferred from electronic annotation // inferred from electronic annotation	GO:0004862 // GO:0008603 // GO:0030552 // GO:0031625 // GO:0034236 // GO:0000166 // GO:0008603 // GO:0008603 // GO:0016301	cAMP-dependent protein kinase inhibitor activity // cAMP-dependent protein kinase regulator activity // cAMP binding // ubiquitin protein ligase binding // protein kinase A catalytic subunit binding // nucleotide binding // cAMP-dependent protein kinase regulator activity // cAMP-dependent protein kinase regulator activity // kinase activity	inferred from direct assay // inferred from direct assay // inferred from electronic annotation // inferred from direct assay // inferred from physical interaction // inferred from electronic annotation // inferred from electronic annotation // traceable author statement // inferred from electronic annotation	GenMAPP // GenMAPP // GenMAPP	G_Protein_Signaling // Calcium_regulation_in_cardiac_cells // Smooth_muscle_contraction	---	---	---	17050154	25	1	main
17104484	7.52572	7.62226	8.35023	7.47862		7.57399	7.91443		NM_012310	KIF4A	kinesin family member 4A	Xq13.1	NM_012310	RefSeq	Homo sapiens kinesin family member 4A (KIF4A), mRNA.	89	89	8	9	TRUE	Hs.648326	adrenal gland| ascites| blood| bone| bone marrow| brain| cervix| connective tissue| embryonic tissue| eye| heart| intestine| kidney| liver| lung| lymph| lymph node| mammary gland| mouth| muscle| nerve| ovary| pancreas| placenta| prostate| skin| stomach| testis| thymus| thyroid| trachea| uterus| vascular|adrenal tumor| breast (mammary gland) tumor| cervical tumor| chondrosarcoma| colorectal tumor|…	chrX	+	69509879	69640774	NM_012310	O95239	GO:0006996 // GO:0007018 // GO:0007411 // GO:0007596 // GO:0008089 // GO:0008152 // GO:0008152 // GO:0019886 // GO:0007018	organelle organization // microtubule-based movement // axon guidance // blood coagulation // anterograde axon cargo transport // metabolic process // metabolic process // antigen processing and presentation of exogenous peptide antigen via MHC class II // microtubule-based movement	traceable author statement // traceable author statement // traceable author statement // traceable author statement // traceable author statement // inferred from electronic annotation // traceable author statement // traceable author statement // inferred from electronic annotation	GO:0005634 // GO:0005694 // GO:0005730 // GO:0005737 // GO:0005829 // GO:0005871 // GO:0005876 // GO:0016363 // GO:0030496 // GO:0005634 // GO:0005737 // GO:0005819 // GO:0005856 // GO:0005874 // GO:0016020 // GO:0030496	nucleus // chromosome // nucleolus // cytoplasm // cytosol // kinesin complex // spindle microtubule // nuclear matrix // midbody // nucleus // cytoplasm // spindle // cytoskeleton // microtubule // membrane // midbody	inferred from direct assay // inferred from electronic annotation // inferred from direct assay // traceable author statement // traceable author statement // inferred from electronic annotation // traceable author statement // inferred from electronic annotation // inferred from direct assay // inferred from electronic annotation // inferred from electronic annotation // inferred from electronic…	GO:0003677 // GO:0003777 // GO:0005524 // GO:0008017 // GO:0000166 // GO:0003777	DNA binding // microtubule motor activity // ATP binding // microtubule binding // nucleotide binding // microtubule motor activity	inferred from electronic annotation // inferred from electronic annotation // inferred from electronic annotation // inferred from electronic annotation // inferred from electronic annotation // traceable author statement	---	---	---	---	---	17104484	9	1	main
16904780	4.98284	5.82413	6.46845	5.45693		5.40349	5.96269		NM_020675	SPC25	SPC25, NDC80 kinetochore complex component	2q31.1	NM_020675	RefSeq	Homo sapiens SPC25, NDC80 kinetochore complex component (SPC25), mRNA.	70	70	16	23	TRUE	Hs.421956	adrenal gland| bladder| blood| bone| bone marrow| brain| embryonic tissue| eye| intestine| kidney| liver| lung| lymph| lymph node| mammary gland| ovary| pancreas| pharynx| placenta| prostate| skin| testis|adrenal tumor| bladder carcinoma| breast (mammary gland) tumor| chondrosarcoma| germ cell tumor| glioma| kidney tumor| leukemia| liver tumor| lung tumor| lymphoma| normal| ovarian tumor| pancrea…	chr2	-	169690642	169769881	NM_020675	Q9HBM1	GO:0000278 // GO:0007052 // GO:0007059 // GO:0007067 // GO:0007049 // GO:0051301	mitotic cell cycle // mitotic spindle organization // chromosome segregation // mitotic nuclear division // cell cycle // cell division	traceable author statement // inferred from mutant phenotype // inferred from mutant phenotype // inferred from electronic annotation // inferred from electronic annotation // inferred from electronic annotation	GO:0000777 // GO:0005634 // GO:0005829 // GO:0031262 // GO:0000775 // GO:0000776 // GO:0000777 // GO:0005694	condensed chromosome kinetochore // nucleus // cytosol // Ndc80 complex // chromosome, centromeric region // kinetochore // condensed chromosome kinetochore // chromosome	inferred from direct assay // inferred from electronic annotation // traceable author statement // inferred from direct assay // inferred from electronic annotation // inferred from electronic annotation // inferred from electronic annotation // inferred from electronic annotation	GO:0005515	protein binding	inferred from physical interaction	---	---	---	---	---	16904780	23	1	main
16877473	6.31281	7.67344	7.60621	6.54839		6.99313	7.0773		NM_001130009	GEN1	GEN1 Holliday junction 5 flap endonuclease	2p24.2	NM_001130009	RefSeq	Homo sapiens GEN1 Holliday junction 5 flap endonuclease (GEN1), transcript variant 2, mRNA.	95	95	19	20	TRUE	Hs.467793	bladder| bone marrow| brain| connective tissue| embryonic tissue| intestine| kidney| liver| lung| lymph node| mammary gland| mouth| muscle| ovary| parathyroid| pharynx| placenta| prostate| skin| spleen| stomach| testis| thymus| uterus| chondrosarcoma| colorectal tumor| gastrointestinal tumor| germ cell tumor| head and neck tumor| non-neoplasia| normal| ovarian tumor| skin tumor| soft tissue/muscl…	chr2	+	17935125	17966632	NM_001130009	Q17RS7	GO:0000724 // GO:0000737 // GO:0010824 // GO:0071139 // GO:0071140 // GO:0090267 // GO:0006281 // GO:0006974 // GO:0090305	double-strand break repair via homologous recombination // DNA catabolic process, endonucleolytic // regulation of centrosome duplication // resolution of recombination intermediates // resolution of mitotic recombination intermediates // positive regulation of mitotic cell cycle spindle assembly checkpoint // DNA repair // cellular response to DNA damage stimulus // nucleic acid phosphodiester b…	inferred from mutant phenotype // inferred from mutant phenotype // inferred from mutant phenotype // inferred from mutant phenotype // inferred from mutant phenotype // inferred from mutant phenotype // inferred from electronic annotation // inferred from electronic annotation // inferred from electronic annotation	GO:0005634 // GO:0005813 // GO:0070062	nucleus // centrosome // extracellular vesicular exosome	inferred from electronic annotation // inferred from direct assay // inferred from direct assay	GO:0003677 // GO:0008821 // GO:0046872 // GO:0003824 // GO:0004518 // GO:0004519 // GO:0016787	DNA binding // crossover junction endodeoxyribonuclease activity // metal ion binding // catalytic activity // nuclease activity // endonuclease activity // hydrolase activity	inferred from electronic annotation // inferred from mutant phenotype // inferred from electronic annotation // inferred from electronic annotation // inferred from electronic annotation // inferred from electronic annotation // inferred from electronic annotation	---	---	---	---	---	16877473	20	1	main
17016043	10.6662	11.2361	8.73436	8.16147		10.9512	8.44791		NM_001080480	MBOAT1	membrane bound O-acyltransferase domain containing 1	6p22.3	NM_001080480	RefSeq	Homo sapiens membrane bound O-acyltransferase domain containing 1 (MBOAT1), transcript variant 1, mRNA.	100	100	27	27	TRUE	Hs.377830	ascites| blood| bone| brain| connective tissue| ear| embryonic tissue| eye| intestine| kidney| larynx| liver| lung| mammary gland| mouth| ovary| pancreas| placenta| prostate| skin| testis| thymus| trachea| uterus| breast (mammary gland) tumor| chondrosarcoma| colorectal tumor| gastrointestinal tumor| germ cell tumor| head and neck tumor| kidney tumor| leukemia| liver tumor| non-neoplasia| normal|…	chr6	-	20100935	20212670	NM_001080480	Q6ZNC8	GO:0006644 // GO:0036150 // GO:0036152 // GO:0044281 // GO:0046474 // GO:0006629 // GO:0006644 // GO:0008654	phospholipid metabolic process // phosphatidylserine acyl-chain remodeling // phosphatidylethanolamine acyl-chain remodeling // small molecule metabolic process // glycerophospholipid biosynthetic process // lipid metabolic process // phospholipid metabolic process // phospholipid biosynthetic process	traceable author statement // traceable author statement // traceable author statement // traceable author statement // traceable author statement // inferred from electronic annotation // inferred from electronic annotation // inferred from electronic annotation	GO:0005789 // GO:0016021 // GO:0016020	endoplasmic reticulum membrane // integral component of membrane // membrane	traceable author statement // inferred from electronic annotation // inferred from electronic annotation	GO:0016747 // GO:0016740 // GO:0016746	transferase activity, transferring acyl groups other than amino-acyl groups // transferase activity // transferase activity, transferring acyl groups	inferred from electronic annotation // inferred from electronic annotation // inferred from electronic annotation	---	---	---	---	---	17016043	27	1	main
16841137	7.65238	7.37024	9.06071	8.56899		7.51131	8.81485		NM_001130831	GAS7	growth arrest-specific 7	17p13.1	NM_001130831	RefSeq	Homo sapiens growth arrest-specific 7 (GAS7), transcript variant d, mRNA.	81	81	13	16	TRUE	Hs.462214	adipose tissue| adrenal gland| blood| bone| brain| connective tissue| ear| embryonic tissue| eye| heart| intestine| kidney| lung| lymph node| mammary gland| mouth| muscle| nerve| ovary| pancreas| pharynx| pituitary gland| placenta| prostate| skin| spleen| stomach| testis| thymus| thyroid| trachea| uterus| vascular|adrenal tumor| bladder carcinoma| breast (mammary gland) tumor| gastrointestinal tu…	chr17	-	9813926	10101868	NM_001130831	O60861	GO:0006355 // GO:0007050 // GO:0008360 // GO:0030041 // GO:0048812 // GO:0051017 // GO:0007275 // GO:0007399 // GO:0030154 // GO:0030182	regulation of transcription, DNA-templated // cell cycle arrest // regulation of cell shape // actin filament polymerization // neuron projection morphogenesis // actin filament bundle assembly // multicellular organismal development // nervous system development // cell differentiation // neuron differentiation	traceable author statement // traceable author statement // inferred from electronic annotation // inferred from electronic annotation // inferred from electronic annotation // inferred from electronic annotation // inferred from electronic annotation // inferred from electronic annotation // inferred from electronic annotation // inferred from electronic annotation	GO:0001726 // GO:0005737 // GO:0005884	ruffle // cytoplasm // actin filament	inferred from electronic annotation // inferred from electronic annotation // inferred from electronic annotation	GO:0003700 // GO:0051015	sequence-specific DNA binding transcription factor activity // actin filament binding	traceable author statement // inferred from electronic annotation	---	---	---	---	---	16841137	16	1	main
16692834	8.03226	7.61525	4.28777	4.17416		7.82376	4.23096		ENST00000448301	CTSS	cathepsin S	1q21	ENST00000448301	ENSEMBL	ensembl_havana_transcript:known chromosome:GRCh38:1:150732567:150765792:-1 gene:ENSG00000163131 gene_biotype:protein_coding transcript_biotype:protein_coding	100	73	19	19	FALSE	Hs.181301	adipose tissue| adrenal gland| ascites| bladder| blood| bone marrow| brain| cervix| connective tissue| ear| esophagus| eye| heart| intestine| kidney| liver| lung| lymph| lymph node| mammary gland| mouth| muscle| ovary| pancreas| pharynx| placenta| prostate| salivary gland| skin| spleen| stomach| testis| thymus| tonsil| trachea| uterus| vascular|adrenal tumor| bladder carcinoma| breast (mammary gl…	chr1	-	150702551	150738433	ENST00000448301	P25774	GO:0002224 // GO:0002250 // GO:0002474 // GO:0002480 // GO:0006508 // GO:0006955 // GO:0019882 // GO:0019886 // GO:0022617 // GO:0030198 // GO:0030574 // GO:0034769 // GO:0042590 // GO:0045087 // GO:0051603 // GO:0097067 // GO:0006508	toll-like receptor signaling pathway // adaptive immune response // antigen processing and presentation of peptide antigen via MHC class I // antigen processing and presentation of exogenous peptide antigen via MHC class I, TAP-independent // proteolysis // immune response // antigen processing and presentation // antigen processing and presentation of exogenous peptide antigen via MHC class II /…	traceable author statement // inferred from expression pattern // traceable author statement // traceable author statement // traceable author statement // traceable author statement // traceable author statement // traceable author statement // traceable author statement // traceable author statement // inferred from direct assay // inferred from direct assay // traceable author statement // tra…	GO:0005576 // GO:0005576 // GO:0005615 // GO:0005764 // GO:0036021 // GO:0043202 // GO:0043231 // GO:0016020 // GO:0005764	extracellular region // extracellular region // extracellular space // lysosome // endolysosome lumen // lysosomal lumen // intracellular membrane-bounded organelle // membrane // lysosome	non-traceable author statement // traceable author statement // inferred from direct assay // inferred from direct assay // traceable author statement // traceable author statement // inferred from direct assay // inferred from electronic annotation // inferred from electronic annotation	GO:0001968 // GO:0004197 // GO:0005518 // GO:0043236 // GO:0043394 // GO:0004197 // GO:0008234 // GO:0008233 // GO:0016787	fibronectin binding // cysteine-type endopeptidase activity // collagen binding // laminin binding // proteoglycan binding // cysteine-type endopeptidase activity // cysteine-type peptidase activity // peptidase activity // hydrolase activity	inferred from physical interaction // inferred from direct assay // inferred from direct assay // inferred from direct assay // inferred from physical interaction // traceable author statement // inferred from electronic annotation // inferred from electronic annotation // inferred from electronic annotation	---	---	Pfam // Pfam	IPR000668 // IPR013201	Peptidase C1A, papain C-terminal // Proteinase inhibitor I29, cathepsin propeptide	16692834	26	1	main
16698697	9.02574	9.663	5.74257	5.59198		9.34437	5.66728		NM_001142473	FAIM3	Fas apoptotic inhibitory molecule 3	1q32.1	NM_001142473	RefSeq	Homo sapiens Fas apoptotic inhibitory molecule 3 (FAIM3), transcript variant 3, mRNA.	100	65	17	17	FALSE	Hs.744273	adipose tissue| blood| bone| brain| connective tissue| esophagus| eye| heart| intestine| lung| lymph node| mammary gland| pancreas| pharynx| pituitary gland| placenta| prostate| salivary gland| spleen| stomach| thymus| tonsil| trachea| uterus| vascular| breast (mammary gland) tumor| chondrosarcoma| colorectal tumor| gastrointestinal tumor| germ cell tumor| glioma| leukemia| lymphoma| non-neoplasi…	chr1	-	207076630	207096592	NM_001142473	O60667	GO:0002376 // GO:0006968 // GO:0043066	immune system process // cellular defense response // negative regulation of apoptotic process	inferred from electronic annotation // traceable author statement // traceable author statement	GO:0005576 // GO:0016021 // GO:0016020	extracellular region // integral component of membrane // membrane	inferred from electronic annotation // inferred from electronic annotation // inferred from electronic annotation	---	---	---	---	---	---	---	---	16698697	26	1	main
16979043	7.31146	5.68347	4.36092	5.35474		6.49746	4.85783		OTTHUMT00000366003	RP11-269F21.2	novel transcript	---	OTTHUMT00000366003	Havana transcript	cdna:all chromosome:VEGA56:4:111804418:111809694:-1 Gene:OTTHUMG00000161755	100	100	19	19	TRUE	---	---	chr4	-	112725574	112730850	---	---	---	---	---	---	---	---	---	---	---	---	---	---	---	---	16979043	19	1	main
16819082	8.94994	9.00511	11.49	11.2603		8.97753	11.3751		NM_017839	LPCAT2	lysophosphatidylcholine acyltransferase 2	16q12.2	NM_017839	RefSeq	Homo sapiens lysophosphatidylcholine acyltransferase 2 (LPCAT2), mRNA.	100	100	22	22	TRUE	Hs.460857	bladder| blood| bone marrow| brain| connective tissue| embryonic tissue| eye| intestine| kidney| lung| lymph node| mouth| muscle| nerve| ovary| pancreas| parathyroid| placenta| prostate| salivary gland| skin| testis| thymus| thyroid| trachea| uterus| vascular| bladder carcinoma| chondrosarcoma| colorectal tumor| germ cell tumor| glioma| head and neck tumor| kidney tumor| leukemia| lung tumor| lym…	chr16	+	55542910	55620582	NM_017839	Q7L5N7	GO:0006644 // GO:0006663 // GO:0036151 // GO:0036151 // GO:0044281 // GO:0046474 // GO:0061024 // GO:0006629 // GO:0006644 // GO:0006663 // GO:0008152 // GO:0008654 // GO:0061024	phospholipid metabolic process // platelet activating factor biosynthetic process // phosphatidylcholine acyl-chain remodeling // phosphatidylcholine acyl-chain remodeling // small molecule metabolic process // glycerophospholipid biosynthetic process // membrane organization // lipid metabolic process // phospholipid metabolic process // platelet activating factor biosynthetic process // metabol…	traceable author statement // inferred from sequence or structural similarity // inferred from direct assay // traceable author statement // traceable author statement // traceable author statement // inferred from sequence or structural similarity // inferred from electronic annotation // inferred from electronic annotation // inferred from electronic annotation // inferred from electronic annot…	GO:0000139 // GO:0005783 // GO:0005783 // GO:0005789 // GO:0005795 // GO:0005811 // GO:0016021 // GO:0005783 // GO:0005789 // GO:0005794 // GO:0005795 // GO:0005811 // GO:0016020	Golgi membrane // endoplasmic reticulum // endoplasmic reticulum // endoplasmic reticulum membrane // Golgi stack // lipid particle // integral component of membrane // endoplasmic reticulum // endoplasmic reticulum membrane // Golgi apparatus // Golgi stack // lipid particle // membrane	inferred from electronic annotation // inferred from direct assay // inferred from sequence or structural similarity // traceable author statement // inferred from sequence or structural similarity // inferred from direct assay // inferred from electronic annotation // inferred from electronic annotation // inferred from electronic annotation // inferred from electronic annotation // inferred fro…	GO:0003841 // GO:0005509 // GO:0047184 // GO:0047184 // GO:0047192 // GO:0016740 // GO:0016746 // GO:0046872 // GO:0047184 // GO:0047192	1-acylglycerol-3-phosphate O-acyltransferase activity // calcium ion binding // 1-acylglycerophosphocholine O-acyltransferase activity // 1-acylglycerophosphocholine O-acyltransferase activity // 1-alkylglycerophosphocholine O-acetyltransferase activity // transferase activity // transferase activity, transferring acyl groups // metal ion binding // 1-acylglycerophosphocholine O-acyltransferase a…	inferred from electronic annotation // inferred from electronic annotation // inferred from direct assay // inferred from sequence or structural similarity // inferred from sequence or structural similarity // inferred from electronic annotation // inferred from electronic annotation // inferred from electronic annotation // inferred from electronic annotation // inferred from electronic annotati…	---	---	---	---	---	16819082	22	1	main
16737843	7.4319	8.24998	5.70573	6.07162		7.84094	5.88867		NM_002334	LRP4	low density lipoprotein receptor-related protein 4	11p11.2	NM_002334	RefSeq	Homo sapiens low density lipoprotein receptor-related protein 4 (LRP4), mRNA.	100	91	30	30	FALSE	Hs.4930	blood| brain| cervix| connective tissue| ear| embryonic tissue| eye| heart| intestine| kidney| larynx| lung| mouth| muscle| nerve| pharynx| placenta| skin| testis| thymus| thyroid| trachea| uterus| cervical tumor| chondrosarcoma| colorectal tumor| gastrointestinal tumor| germ cell tumor| glioma| head and neck tumor| leukemia| lung tumor| non-neoplasia| normal| primitive neuroectodermal tumor of t…	chr11	-	46878268	46940193	NM_002334	O75096	GO:0001822 // GO:0001932 // GO:0001942 // GO:0006897 // GO:0009953 // GO:0009954 // GO:0016055 // GO:0030198 // GO:0030279 // GO:0042475 // GO:0042733 // GO:0048813 // GO:0050771 // GO:0050808 // GO:0051124 // GO:0051290 // GO:0060173 // GO:0071340 // GO:0090090 // GO:0090090 // GO:0097104 // GO:0097105 // GO:1901631 // GO:0001822 // GO:0007275 // GO:0008104 // GO:0030154 // GO:0030178 // GO:0030…	kidney development // regulation of protein phosphorylation // hair follicle development // endocytosis // dorsal/ventral pattern formation // proximal/distal pattern formation // Wnt signaling pathway // extracellular matrix organization // negative regulation of ossification // odontogenesis of dentin-containing tooth // embryonic digit morphogenesis // dendrite morphogenesis // negative regula…	inferred from direct assay // inferred from electronic annotation // inferred from electronic annotation // inferred from electronic annotation // inferred from electronic annotation // inferred from electronic annotation // inferred from electronic annotation // traceable author statement // inferred from mutant phenotype // inferred from electronic annotation // inferred from electronic annotat…	GO:0009986 // GO:0009986 // GO:0014069 // GO:0016021 // GO:0016600 // GO:0030425 // GO:0031594 // GO:0043025 // GO:0097060 // GO:0005886 // GO:0016020	cell surface // cell surface // postsynaptic density // integral component of membrane // flotillin complex // dendrite // neuromuscular junction // neuronal cell body // synaptic membrane // plasma membrane // membrane	inferred from direct assay // inferred from sequence or structural similarity // inferred from sequence or structural similarity // inferred from electronic annotation // inferred from sequence or structural similarity // inferred from sequence or structural similarity // inferred from sequence or structural similarity // inferred from sequence or structural similarity // inferred from sequence o…	GO:0005509 // GO:0005515 // GO:0030971 // GO:0042803 // GO:0097110 // GO:0030971	calcium ion binding // protein binding // receptor tyrosine kinase binding // protein homodimerization activity // scaffold protein binding // receptor tyrosine kinase binding	inferred from electronic annotation // inferred from physical interaction // inferred from sequence or structural similarity // inferred from electronic annotation // inferred from sequence or structural similarity // inferred from electronic annotation	---	---	---	---	---	16737843	33	1	main
16790744	9.52055	9.41043	5.45381	5.23631		9.46549	5.34506		NM_012244	SLC7A8	solute carrier family 7 (amino acid transporter light chain, L system), member 8	14q11.2	NM_012244	RefSeq	Homo sapiens solute carrier family 7 (amino acid transporter light chain, L system), member 8 (SLC7A8), transcript variant 1, mRNA.	100	61	11	11	FALSE	Hs.596643	adipose tissue| adrenal gland| bladder| blood| bone| bone marrow| brain| connective tissue| embryonic tissue| esophagus| eye| intestine| kidney| larynx| liver| lung| mammary gland| mouth| muscle| ovary| pancreas| parathyroid| placenta| prostate| skin| spleen| stomach| testis| thymus| thyroid| trachea| uterus| vascular|adrenal tumor| bladder carcinoma| breast (mammary gland) tumor| chondrosarcoma|…	chr14	-	23594504	23652883	NM_012244	Q9UHI5	GO:0006520 // GO:0006810 // GO:0006811 // GO:0006865 // GO:0006865 // GO:0007596 // GO:0009636 // GO:0015695 // GO:0015804 // GO:0050900 // GO:0055065 // GO:0055085 // GO:1901998 // GO:1902475 // GO:0003333 // GO:0006810 // GO:0006865 // GO:0015807	cellular amino acid metabolic process // transport // ion transport // amino acid transport // amino acid transport // blood coagulation // response to toxic substance // organic cation transport // neutral amino acid transport // leukocyte migration // metal ion homeostasis // transmembrane transport // toxin transport // L-alpha-amino acid transmembrane transport // amino acid transmembrane tra…	traceable author statement // traceable author statement // traceable author statement // inferred from direct assay // traceable author statement // traceable author statement // non-traceable author statement // inferred from direct assay // inferred from sequence or structural similarity // traceable author statement // non-traceable author statement // traceable author statement // inferred f…	GO:0005737 // GO:0005886 // GO:0005886 // GO:0005887 // GO:0016323 // GO:0070062 // GO:0005886 // GO:0016020 // GO:0016021	cytoplasm // plasma membrane // plasma membrane // integral component of plasma membrane // basolateral plasma membrane // extracellular vesicular exosome // plasma membrane // membrane // integral component of membrane	inferred from electronic annotation // inferred from direct assay // traceable author statement // traceable author statement // inferred from electronic annotation // inferred from direct assay // inferred from electronic annotation // inferred from electronic annotation // inferred from electronic annotation	GO:0005515 // GO:0015101 // GO:0015171 // GO:0015171 // GO:0015171 // GO:0015175 // GO:0015179 // GO:0019534 // GO:0042605 // GO:0015171 // GO:0015171	protein binding // organic cation transmembrane transporter activity // amino acid transmembrane transporter activity // amino acid transmembrane transporter activity // amino acid transmembrane transporter activity // neutral amino acid transmembrane transporter activity // L-amino acid transmembrane transporter activity // toxin transporter activity // peptide antigen binding // amino acid tran…	inferred from physical interaction // inferred from direct assay // not recorded // inferred from direct assay // inferred from sequence or structural similarity // traceable author statement // inferred from electronic annotation // inferred from direct assay // inferred from sequence or structural similarity // --- // inferred from electronic annotation	---	---	---	---	---	16790744	18	1	main
[truncated: 47,942 more rows]
