# Supplementary material for: Loss of Gene Information: Discrepancies between RNA Sequencing, cDNA Microarray, and qRT-PCR
Source: Int J Mol Sci. 2021 Aug 28;22(17):9349. doi: 10.3390/ijms22179349 (PMC8430810; doi:10.3390/ijms22179349)
Supplement: Supplementary file 1 [file ijms-22-09349-s001.zip › Supplementary_Table_S2.xlsx]

## Sheet: DESeq2_Suppl 2_com
	GeneSymbol	Mel_Im_untreated_rep1	MelIm_untreated_rep2	Mel_Juso_untreated_rep1	Mel_Juso_untreated_rep2
1	DDX11L1	0	0	2.75222	0
2	WASH7P	1.02868	3.409	3.66962	0
3	MIR6859-1	0	0	2.75222	0
4	RP11-34P13.3	0	0	0	0
5	OR4G11P	0	0	0	4.82792
6	OR4F5	0	0.6818	0	0
7	RP11-34P13.7	0	0	0.917406	0
8	RP11-34P13.13	2.05736	2.0454	0.917406	0
9	FO538757.3	0	0.6818	1.83481	0
10	FO538757.2	28.8031	9.5452	50.4573	8.44886
11	AP006222.2	3.08605	3.409	0	2.41396
12	RPL23AP24	0	0	0	0
13	RP4-669L17.10	4.11473	4.7726	0.917406	0
14	RP5-857K21.4	0	0	0	0
15	MTND1P23	0	0.6818	0.917406	0
16	MTND2P28	279.801	16.3632	63.301	144.838
17	AC114498.1	1.02868	4.0908	1.83481	3.62094
18	MTCO1P12	152.245	184.086	49.5399	74.8328
19	MTCO2P12	15.4302	8.8634	9.17406	10.8628
20	MTATP8P1	2.05736	0	0.917406	0
21	MTATP6P1	881.58	542.713	469.712	497.276
22	MTCO3P12	27.7744	19.0904	22.0177	8.44886
23	CICP3	1.02868	0	0	0
24	RP11-206L10.2	16.4589	14.3178	22.0177	8.44886
25	RNU6-1199P	0	0.6818	0	0
26	RP11-206L10.4	0	1.3636	0	0
27	RP11-206L10.9	14.4015	11.5906	68.8054	89.3165
28	RP11-206L10.8	6.17209	4.0908	8.25665	27.7605
29	FAM87B	3.08605	0	11.0089	13.2768
30	LINC01128	48.348	66.8164	222.93	196.738
31	LINC00115	1.02868	3.409	4.58703	15.6907
32	FAM41C	0	0	1.83481	0
33	TUBB8P11	0	0.6818	0	0
34	RP11-54O7.1	0	0	0.917406	1.20698
35	RP11-54O7.3	0	0	0.917406	0
36	SAMD11	1.02868	1.3636	2.75222	0
37	NOC2L	791.056	948.384	1079.79	301.745
38	KLHL17	27.7744	40.2262	47.7051	9.65584
39	PLEKHN1	4.11473	1.3636	8.25665	0
40	PERM1	8.22945	2.0454	17.4307	1.20698
41	RP11-54O7.17	0	0	0.917406	0
42	HES4	1.02868	0.6818	4.58703	0
43	ISG15	6.17209	0.6818	0	0
44	RP11-54O7.10	0	0	0	0
45	RP11-54O7.11	0	0	0	0
46	AGRN	371.354	176.586	279.809	57.935
47	RP11-465B22.3	5.14341	4.0908	37.6136	9.65584
48	RP11-54O7.18	0	1.3636	5.50444	0
49	RNF223	4.11473	0	1.83481	1.20698
50	C1orf159	33.9465	21.1358	22.0177	9.65584
51	TTLL10	0	0	0	0
52	TNFRSF18	0	0	0	0
53	SDF4	488.624	348.4	522.921	78.4537
54	B3GALT6	60.6922	72.9526	115.593	91.7305
55	FAM132A	0	0	0.917406	0
56	RP5-902P8.12	1.02868	1.3636	0	1.20698
57	UBE2J2	198.536	207.267	244.947	136.389
58	RP5-902P8.10	0	0.6818	2.75222	2.41396
59	SCNN1D	1.02868	0	11.9263	1.20698
60	ACAP3	165.618	60.6802	130.272	25.3466
61	PUSL1	51.4341	43.6352	30.2744	4.82792
62	CPSF3L	503.025	319.764	478.886	149.666
63	RP5-890O3.9	15.4302	31.3628	28.4396	14.4838
64	CPTP	31.8891	27.9538	66.0532	18.1047
65	TAS1R3	1.02868	2.0454	5.50444	0
66	DVL1	135.786	68.8618	129.354	22.9326
67	MXRA8	2.05736	3.409	2.75222	2.41396
68	AURKAIP1	232.482	222.949	194.49	30.1745
69	RP5-890O3.3	0	1.3636	0	0
70	CCNL2	725.221	678.391	1099.97	525.036
71	RP4-758J18.2	116.241	77.7252	86.2362	13.2768
72	MRPL20	503.025	704.3	299.992	318.643
73	RP4-758J18.13	15.4302	35.4536	16.5133	37.4164
74	ANKRD65	0	0.6818	0	0
75	RP4-758J18.7	0	0	0	0
76	RP4-758J18.10	3.08605	0.6818	0	0
77	VWA1	45.262	40.908	26.6048	2.41396
78	ATAD3C	1.02868	1.3636	0	2.41396
79	ATAD3B	250.998	254.312	135.776	60.349
80	ATAD3A	170.761	173.177	164.216	20.5187
81	TMEM240	5.14341	1.3636	0	0
82	SSU72	846.605	763.616	1181.62	630.044
83	RP5-832C2.5	3.08605	4.7726	16.5133	4.82792
84	C1orf233	1.02868	6.1362	32.1092	0
85	RP11-345P4.9	9.25814	7.4998	39.4485	7.24188
86	MIB2	6.17209	5.4544	37.6136	13.2768
87	CDK11B	138.872	162.268	161.463	72.4188
88	SLC35E2B	258.199	173.177	192.655	95.3514
89	RP11-345P4.7	18.5163	4.0908	13.7611	8.44886
90	RP11-345P4.6	8.22945	5.4544	1.83481	3.62094
91	CDK11A	9.25814	5.4544	15.5959	7.24188
92	RP1-283E3.8	20.5736	12.9542	13.7611	13.2768
93	RP1-283E3.4	28.8031	10.9088	76.1447	31.3815
94	SLC35E2	25.717	15.6814	33.944	7.24188
95	NADK	437.19	394.762	298.157	129.147
96	GNB1	3609.64	2484.48	2586.17	2936.58
97	RP1-140A9.1	3.08605	0.6818	0.917406	1.20698
98	CALML6	0	0	0.917406	0
99	TMEM52	1.02868	0	1.83481	0
100	GABRD	0	0	0.917406	0
101	RP11-547D24.3	2.05736	0	0	0
102	PRKCZ	150.188	109.088	112.841	48.2792
103	RP5-892K4.1	4.11473	4.7726	0	2.41396
104	RP11-181G12.2	8.22945	2.0454	7.33925	4.82792
105	FAAP20	75.0938	81.1342	57.7966	33.7954
106	RP11-181G12.4	0	0	0.917406	0
107	SKI	371.354	150.678	219.26	307.78
108	MORN1	56.5775	36.8172	90.8232	28.9675
109	RP4-740C4.5	3.08605	2.0454	11.9263	0
110	RP4-740C4.7	1.02868	2.0454	6.42184	6.0349
111	RER1	1012.22	1283.15	917.406	860.577
112	PEX10	144.015	108.406	72.4751	56.7281
113	PLCH2	0	0	1.83481	0
114	PANK4	147.101	187.495	105.502	59.142
115	RP3-395M20.12	1.02868	0	4.58703	0
116	RP3-395M20.8	182.077	54.544	102.749	26.5536
117	TNFRSF14	1063.66	494.987	775.208	203.98
118	RP3-395M20.7	21.6023	0.6818	10.0915	3.62094
119	RP3-395M20.9	7.20077	0	6.42184	4.82792
120	FAM213B	168.704	327.264	106.419	90.5235
121	MMEL1	1.02868	0.6818	0	0
122	RP13-436F16.1	0	0	0	0
123	TTC34	15.4302	0.6818	8.25665	14.4838
124	RP11-740P5.3	0	0	0	0
125	LINC00982	0	0	0.917406	1.20698
126	PRDM16	1.02868	0	15.5959	2.41396
127	RP11-193J6.1	0	0	0	0
128	RP11-22L13.1	0	0	2.75222	1.20698
129	ARHGEF16	8.22945	2.0454	5.50444	0
130	RP11-168F9.2	0	0	0	0
131	MEGF6	2.05736	0	4.58703	0
132	MIR551A	0	0	0	0
133	RP11-46F15.2	0	0	3.66962	0
134	TPRG1L	292.146	127.497	161.463	155.7
135	WRAP73	151.216	78.407	146.785	57.935
136	TP73	1.02868	0	0	0
137	RP5-1092A11.5	0	0	0	0
138	RP5-1092A11.2	0	0	0	0
139	TP73-AS1	0	0	0	0
140	CCDC27	1.02868	0.6818	0	0
141	SMIM1	1.02868	0	1.83481	0
142	LRRC47	313.748	484.76	418.337	289.675
143	RN7SL574P	0	2.0454	0	0
144	RP1-286D6.5	1.02868	4.7726	3.66962	2.41396
145	CEP104	450.563	343.627	451.364	296.917
146	DFFB	90.524	81.1342	83.4839	76.0397
147	C1orf174	350.78	394.081	207.334	231.74
148	LINC01134	4.11473	0.6818	7.33925	7.24188
149	LINC01346	0	0	0	0
150	RP5-1166F10.1	0	1.3636	0	0
151	AJAP1	0	0	1.83481	2.41396
152	NPHP4	211.908	90.6794	100.915	45.8652
153	AL356261.1	2.05736	0	0	0
154	KCNAB2	2351.57	657.937	2158.66	389.855
155	CHD5	1.02868	0	17.4307	1.20698
156	RPL22	2411.23	4717.38	2241.22	1937.2
157	RP1-120G22.11	4.11473	1.3636	4.58703	4.82792
158	RNF207	25.717	20.454	41.2833	24.1396
159	ICMT	1750.82	3046.97	1919.21	2257.05
160	LINC00337	5.14341	4.7726	1.83481	2.41396
161	HES3	0	0	0	0
162	GPR153	496.853	299.992	877.04	166.563
163	ACOT7	1344.49	461.579	995.385	363.301
164	HES2	41.1473	8.8634	12.8437	1.20698
165	ESPN	1.02868	0	0	0
166	TNFRSF25	0	1.3636	6.42184	2.41396
167	PLEKHG5	5.14341	2.7272	17.4307	2.41396
168	NOL9	962.846	1513.6	1036.67	1094.73
169	RNU6-731P	0	0	0	2.41396
170	RP11-58A11.2	5.14341	3.409	8.25665	7.24188
171	TAS1R1	2.05736	0.6818	0.917406	0
172	ZBTB48	93.61	55.9076	98.1624	15.6907
173	KLHL21	238.654	505.896	606.405	383.82
174	PHF13	273.629	246.812	192.655	232.947
175	THAP3	77.1511	71.589	74.3099	19.3117
176	DNAJC11	697.446	797.025	772.456	423.65
177	RP11-312B8.1	2.05736	4.0908	4.58703	9.65584
178	CAMTA1	273.629	237.948	177.977	353.645
179	RP11-312B8.2	2.05736	0	0	4.82792
180	CAMTA1-IT1	2.05736	0	0	0
181	RP3-453P22.2	0	0	0	0
182	RP4-549F15.1	0	0	0	0
183	RP11-338N10.1	0	0	1.83481	0
184	RP11-338N10.2	0	0	1.83481	0
185	RP11-338N10.3	0	0	7.33925	2.41396
186	VAMP3	1391.81	2173.58	815.574	1403.72
187	RP3-467L1.6	2.05736	4.7726	6.42184	28.9675
188	PER3	526.685	444.534	317.422	369.336
189	RP3-467L1.4	5.14341	2.0454	4.58703	2.41396
190	UTS2	0	3.409	0	0
191	TNFRSF9	0	0	0	0
192	PARK7	1869.11	2024.27	1499.04	1392.85
193	Y_RNA	3.08605	2.7272	0.917406	4.82792
194	ERRFI1	177.962	425.443	336.688	383.82
195	RP11-431K24.1	0	0.6818	0	0
196	CTA-215D11.4	0	0	0.917406	0
197	RERE	959.76	265.22	481.638	578.143
198	RP5-1115A15.1	1.02868	3.409	2.75222	4.82792
199	SNORA77	0	0	0	1.20698
200	RP5-1115A15.2	1.02868	0.6818	0	0
201	RPL7P11	7.20077	2.7272	0.917406	2.41396
202	RPL7P7	7.20077	2.0454	0.917406	4.82792
203	Y_RNA	0	1.3636	0	2.41396
204	RP4-633I8.3	0	0	0	2.41396
205	RP4-633I8.4	2.05736	3.409	0	1.20698
206	ENO1	14594.9	23968.7	18198.6	10930.4
207	Metazoa_SRP	4.11473	11.5906	13.7611	3.62094
208	MIR6728	1.02868	2.7272	0.917406	1.20698
209	ENO1-IT1	16.4589	31.3628	25.6874	9.65584
210	ENO1-AS1	4.11473	1.3636	1.83481	3.62094
211	HMGN2P17	1.02868	0.6818	0	2.41396
212	RP3-477M7.5	0	0	0.917406	0
213	CA6	4.11473	30.681	0	0
214	SLC2A5	1.02868	0.6818	0	0
215	GPR157	192.363	284.311	177.977	103.8
216	MIR34AHG	80.2372	79.0888	82.5665	39.8303
217	RP3-510D11.2	16.4589	8.1816	5.50444	2.41396
218	RP3-510D11.4	2.05736	0.6818	0.917406	0
219	H6PD	686.131	275.447	906.397	207.601
220	SPSB1	484.509	509.987	139.446	53.1071
221	RNA5SP40	3.08605	0.6818	0.917406	0
222	SLC25A33	329.178	572.712	277.057	370.543
223	RP13-15M17.1	5.14341	7.4998	3.66962	4.82792
224	TMEM201	209.851	186.131	138.528	73.6258
225	PIK3CD	417.645	283.629	986.211	293.296
226	PIK3CD-AS1	0	0	0	0
227	PIK3CD-AS2	83.3232	38.1808	26.6048	10.8628
228	CLSTN1	2087.2	1086.79	988.964	716.946
229	MZT1P1	1.02868	0.6818	0	1.20698
230	AL357140.1	0	0	0	0
231	CTNNBIP1	165.618	111.133	203.664	153.286
232	LZIC	469.079	792.252	349.532	488.827
233	RP11-84A14.4	5.14341	9.5452	2.75222	1.20698
234	NMNAT1	201.622	324.537	197.242	162.942
235	RN7SKP269	3.08605	3.409	3.66962	0
236	MIR5697	1.02868	1.3636	1.83481	0
237	RBP7	0	0.6818	0	0
238	UBE4B	1046.17	902.704	973.368	1038
239	RP11-496H15.2	1.02868	0	0.917406	3.62094
240	PGAM1P11	2.05736	0	0	2.41396
241	RNU6-828P	0	0	0.917406	0
242	KIF1B	2269.27	1487.69	2076.09	2273.95
243	MIR1273D	0	0.6818	0.917406	0
244	RNU6-37P	2.05736	0	1.83481	2.41396
245	PGD	1182.98	797.025	809.152	471.929
246	RP4-736L20.3	0	0	0	0
247	APITD1-CORT	0	0.6818	0.917406	2.41396
248	APITD1	16.4589	21.1358	22.0177	57.935
249	CORT	1.02868	0.6818	0.917406	1.20698
250	DFFA	954.617	1643.14	1651.33	1176.81
251	PEX14	131.671	100.225	111.924	37.4164
252	RN7SL614P	2.05736	1.3636	0	1.20698
253	CASZ1	25.717	8.8634	11.0089	8.44886
254	RP4-734G22.3	10.2868	0.6818	2.75222	0
255	C1orf127	5.14341	0.6818	0	0
256	TARDBP	547.259	608.166	604.57	984.896
257	MASP2	25.717	8.1816	26.6048	31.3815
258	RP4-635E18.8	6.17209	2.7272	13.7611	12.0698
259	SRM	601.779	302.038	294.487	147.252
260	EXOSC10	1539.94	1954.04	1083.46	1093.52
261	RP4-635E18.7	4.11473	4.0908	0.917406	6.0349
262	Metazoa_SRP	3.08605	2.7272	2.75222	3.62094
263	RP4-635E18.6	1.02868	2.7272	2.75222	8.44886
264	MTOR	3733.09	2686.98	2166.91	1612.53
265	MTOR-AS1	8.22945	3.409	2.75222	9.65584
266	RNU6-537P	0	0.6818	0.917406	0
267	ANGPTL7	13.3729	17.7268	6.42184	10.8628
268	RNU6-291P	0	0	0	0
269	RPL39P6	1.02868	3.409	0.917406	4.82792
270	UBIAD1	216.023	259.084	372.467	324.678
271	UBE2V2P3	1.02868	0	4.58703	2.41396
272	PTCHD2	0	0	2.75222	1.20698
273	RP1-69M21.2	0	0	0	0
274	FBXO2	16.4589	3.409	3.66962	3.62094
275	FBXO44	136.815	69.5436	231.186	55.5211
276	FBXO6	90.524	47.0442	44.9529	18.1047
277	MAD2L2	308.605	183.404	244.03	73.6258
278	DRAXIN	7.20077	1.3636	0	0
279	AGTRAP	154.302	64.0892	73.3925	9.65584
280	MTHFR	450.563	141.133	166.05	53.1071
281	CLCN6	546.23	246.812	253.204	187.082
282	NPPA-AS1	16.4589	4.7726	3.66962	2.41396
283	NPPA	4.11473	0.6818	1.83481	7.24188
284	NPPB	0	0	0	0
285	RNU5E-1	347.694	214.767	118.345	772.467
286	RNU5E-4P	54.5201	36.8172	7.33925	36.2094
287	KIAA2013	239.683	273.402	376.136	235.361
288	PLOD1	2871.05	1118.83	3361.38	1340.95
289	MFN2	2147.89	2357.67	2086.18	1196.12
290	RP5-1077B9.5	0	0	0	0
291	MIIP	78.1798	49.0896	44.9529	3.62094
292	Y_RNA	2.05736	0	0	0
293	RN7SL649P	1.02868	0	0	0
294	TNFRSF8	2.05736	2.0454	0	0
295	TNFRSF1B	32.9178	57.953	8.25665	3.62094
296	VPS13D	2609.77	1188.38	2427.46	2601.04
297	AC243836.1	0	0	0	1.20698
298	SNORA59A	1.02868	0.6818	1.83481	2.41396
299	RP5-888M10.2	0	0	0	0
300	DHRS3	68.9217	102.27	116.511	65.1769
301	RNU6ATAC18P	0	0	0	0
302	RP11-474O21.5	2.05736	1.3636	2.75222	0
303	PRAMEF1	0	0	0	0
304	HNRNPCL1	0	2.0454	0.917406	1.20698
305	PRAMEF4	0	0	0	0
306	HNRNPCL3	0	0	0	0
307	HNRNPCL2	0	0	0	0
308	LRRC38	0	0	0	0
309	PRDM2	690.245	565.212	517.417	785.744
310	RP11-344F13.1	0	0.6818	0	0
311	RP4-704D23.1	1.02868	0	0	0
312	KAZN	333.293	150.678	223.847	113.456
313	TMEM51-AS1	66.8643	21.8176	14.6785	8.44886
314	TMEM51	421.76	486.805	167.885	120.698
315	C1orf195	29.8318	10.227	3.66962	13.2768
316	RP1-21O18.3	18.5163	6.818	0.917406	4.82792
317	RP5-903E17.2	2.05736	4.7726	12.8437	6.0349
318	FHAD1	113.155	304.083	103.667	98.9724
319	RP3-467K16.2	0	2.7272	0	2.41396
320	RP3-467K16.7	4.11473	8.8634	8.25665	1.20698
321	RP3-467K16.4	2.05736	2.7272	1.83481	0
322	EFHD2	264.371	441.807	181.646	115.87
323	CTRC	0	0.6818	0	0
324	CELA2B	1.02868	0	0	1.20698
325	CASP9	112.126	88.634	76.1447	63.9699
326	DNAJC16	509.197	634.074	462.373	581.764
327	SCARNA21	2.05736	0.6818	0	0
328	RP4-680D5.8	1.02868	1.3636	0	2.41396
329	AGMAT	29.8318	51.8168	4.58703	6.0349
330	RP4-680D5.2	1.02868	0	1.83481	0
331	CHCHD2P6	1.02868	1.3636	1.83481	2.41396
332	RNU7-179P	0	0	0	0
333	DDI2	686.131	1011.79	790.804	1038
334	RP4-680D5.9	1.02868	3.409	1.83481	2.41396
335	PLEKHM2	474.222	261.13	512.83	114.663
336	RP11-288I21.1	16.4589	12.2724	15.5959	12.0698
337	SLC25A34	5.14341	5.4544	8.25665	10.8628
338	FBLIM1	225.281	97.4974	3.66962	0
339	Metazoa_SRP	1.02868	0	0	0
340	RPL12P14	0	2.0454	0	2.41396
341	UQCRHL	222.195	204.54	247.7	183.461
342	RP11-169K16.8	0	0	0.917406	0
343	FLJ37453	18.5163	11.5906	15.5959	8.44886
344	SPEN	1651.03	672.255	1656.84	2142.39
345	RP1-134O19.3	1.02868	1.3636	0.917406	4.82792
346	ZBTB17	120.356	51.8168	91.7406	8.44886
347	RP11-5P18.1	1.02868	0	0	1.20698
348	HSPB7	22.631	4.7726	0.917406	0
349	CLCNKA	8.22945	0	0.917406	0
350	RP11-5P18.10	0	0	3.66962	0
351	CLCNKB	1.02868	0	2.75222	0
352	FAM131C	0	0	25.6874	0
353	EPHA2	250.998	141.133	266.048	48.2792
354	RP11-276H7.2	3.08605	0.6818	1.83481	0
355	RP11-276H7.3	1.02868	0	0	0
356	ARHGEF19	12.3442	5.4544	17.4307	4.82792
357	ANO7P1	2.05736	0	2.75222	0
358	RSG1	15.4302	9.5452	10.0915	1.20698
359	MT1XP1	0	0	0.917406	1.20698
360	FBXO42	293.174	352.491	358.706	378.992
361	SZRD1	744.766	842.023	715.577	487.62
362	RP11-430L17.1	3.08605	1.3636	5.50444	10.8628
363	SPATA21	3.08605	2.0454	7.33925	2.41396
364	NECAP2	278.773	332.719	249.534	264.329
365	RP4-798A10.2	14.4015	6.1362	7.33925	10.8628
366	CROCCP3	27.7744	17.7268	34.8614	47.0722
367	RNU1-1	23.6597	30.681	4.58703	12.0698
368	RP4-798A10.7	1.02868	4.0908	0	0
369	RP4-798A10.4	0	0	0	0
370	RP5-875O13.1	7.20077	6.818	0	0
371	NBPF1	239.683	203.176	198.16	172.598
372	RP5-1182A14.5	3.08605	0.6818	2.75222	1.20698
373	CROCCP2	60.6922	36.8172	41.2833	8.44886
374	MST1P2	17.4876	6.818	18.3481	1.20698
375	RNU1-3	0	3.409	0	0
376	EIF1AXP1	4.11473	4.7726	13.7611	16.8977
377	CROCC	279.801	170.45	74.3099	6.0349
378	RNU1-4	4.11473	2.0454	0	0
379	MST1L	8.22945	0.6818	7.33925	3.62094
380	RP11-108M9.3	8.22945	9.5452	0	0
381	RP11-108M9.4	28.8031	10.227	19.2655	19.3117
382	RP11-108M9.5	1.02868	2.0454	0	0
383	RNU1-2	27.7744	31.3628	12.8437	12.0698
384	RP11-108M9.6	3.08605	2.0454	3.66962	2.41396
385	MFAP2	119.327	70.2254	2.75222	0
386	RP1-37C10.3	1.02868	1.3636	0.917406	1.20698
387	ATP13A2	578.119	303.401	359.623	98.9724
388	SDHB	2293.96	2210.4	1599.04	1483.38
389	PADI2	10.2868	9.5452	18.3481	12.0698
390	RP11-380J14.1	0	0	0	0
391	PADI1	2.05736	11.5906	0	0
392	PADI3	2.05736	2.0454	1.83481	2.41396
393	AC004824.2	0	0	0	0
394	PADI6	0	0	0	0
395	RCC2	2409.17	2909.92	1479.78	969.205
396	ARHGEF10L	63.7783	30.681	77.0621	8.44886
397	ACTL8	1.02868	2.7272	1.83481	0
398	KLHDC7A	0	0	0	1.20698
399	DYNLL1P3	0	0	1.83481	0
400	PAX7	0	0	0	0
401	TAS1R2	0	0	0	0
402	RP13-279N23.2	0	0	0	0
403	ALDH4A1	150.188	67.4982	33.944	18.1047
404	MIR1290	0	0	0	0
405	IFFO2	300.375	534.531	487.143	352.438
406	RP5-1126H10.2	4.11473	4.0908	19.2655	9.65584
407	UBR4	8258.26	3159.46	4733.81	4055.45
408	RP1-43E13.2	0	1.3636	4.58703	0
409	EMC1	2249.73	2062.45	1733.9	1420.62
410	MRTO4	711.848	1409.28	1012.82	872.647
411	AKR7L	32.9178	0.6818	3.66962	2.41396
412	AKR7A3	3.08605	8.8634	1.83481	4.82792
413	RP4-657E11.10	12.3442	6.818	6.42184	13.2768
414	AKR7A2	327.121	285.674	293.57	218.463
415	RNU6-1099P	2.05736	0.6818	0.917406	2.41396
416	PQLC2	70.979	102.952	88.9884	41.0373
417	CAPZB	1630.46	843.387	766.951	870.233
418	RN7SL277P	2.05736	0	0	1.20698
419	RP5-1056L3.1	1.02868	0.6818	0	0
420	MINOS1	472.165	233.858	232.104	409.166
421	RP5-1056L3.3	40.1186	6.1362	10.0915	9.65584
422	NBL1	494.796	278.856	161.463	15.6907
423	HTR6	1.02868	0	4.58703	2.41396
424	TMCO4	234.539	188.177	296.322	108.628
425	OTUD3	347.694	499.76	422.924	532.278
426	PLA2G2A	1.02868	0.6818	0	2.41396
427	PLA2G5	0	1.3636	0	0
428	PLA2G2D	0	0	0	0
429	RP3-340N1.2	1.02868	4.0908	0	1.20698
430	PLA2G2C	0	0	0	0
431	UBXN10-AS1	2.05736	0	0	0
432	UBXN10	54.5201	48.4078	0	0
433	VWA5B1	2.05736	0.6818	0	0
434	LINC01141	0	0	0	0
435	CAMK2N1	43.2046	10.9088	90.8232	184.668
436	MUL1	237.625	279.538	338.523	201.566
437	FAM43B	0	0.6818	0	0
438	CDA	2.05736	2.0454	0.917406	2.41396
439	PINK1	29.8318	30.681	55.0444	15.6907
440	PINK1-AS	28.8031	47.0442	44.0355	47.0722
441	DDOST	2637.54	2466.75	2454.98	1025.93
442	KIF17	373.411	233.858	120.18	24.1396
443	RP5-930J4.5	0	0	0	0
444	SH2D5	19.545	51.8168	123.85	65.1769
445	RP5-930J4.2	0	0	0	2.41396
446	HP1BP3	3259.89	3717.86	1969.67	2658.98
447	EIF4G3	1905.12	1782.23	1829.31	1868.41
448	RNU7-200P	0	0	0	0
449	MIR1256	1.02868	0	0	3.62094
450	RPS15AP6	4.11473	0.6818	0.917406	4.82792
451	RP11-487E1.2	3.08605	1.3636	1.83481	0
452	HSPE1P27	6.17209	0.6818	3.66962	6.0349
453	ECE1	732.421	774.525	729.338	347.61
454	RP3-329E20.2	3.08605	2.7272	0.917406	1.20698
455	RP5-1071N3.1	3.08605	2.7272	2.75222	2.41396
456	PPP1R11P1	0	0	0	0
457	NBPF2P	10.2868	7.4998	12.8437	7.24188
458	NBPF3	188.249	220.903	299.074	249.845
459	ALPL	3.08605	4.0908	0	0
460	RAP1GAP	481.423	136.36	5.50444	0
461	USP48	2389.63	1928.13	1338.5	1675.29
462	U7	1.02868	0.6818	0	0
463	RP11-132G19.3	0	2.7272	0	1.20698
464	LDLRAD2	0	0	0.917406	2.41396
465	HSPG2	577.09	197.04	728.42	114.663
466	RP11-26H16.1	0	0	1.83481	2.41396
467	RP1-224A6.3	3.08605	0	3.66962	0
468	LINC00339	153.274	123.406	123.85	74.8328
469	CDC42	2506.9	5435.31	1593.53	3360.23
470	CDC42-IT1	2.05736	0.6818	5.50444	1.20698
471	RP1-224A6.8	4.11473	0.6818	4.58703	7.24188
472	RP1-224A6.9	4.11473	4.7726	4.58703	25.3466
473	WNT4	4.11473	6.1362	9.17406	4.82792
474	RP11-415K20.1	0	0	0	1.20698
475	ZBTB40	852.777	824.978	816.491	674.702
476	ZBTB40-IT1	5.14341	2.7272	4.58703	8.44886
477	EPHA8	1.02868	0	0	0
478	EPHB2	1.02868	1.3636	4.58703	0
479	C1orf234	0	0.6818	0	0
480	KDM1A	1717.9	6845.28	1519.22	1544.93
481	RP1-184J9.2	0	5.4544	2.75222	1.20698
482	MIR3115	1.02868	0	0	0
483	MIR4419A	0	0.6818	0	1.20698
484	LUZP1	1215.9	1384.74	759.612	1275.78
485	RP5-979D14.1	2.05736	2.0454	0	2.41396
486	RNU6-514P	0	0.6818	0	2.41396
487	RNU6-135P	1.02868	0	0	0
488	HTR1D	0	2.0454	0.917406	1.20698
489	LINC01355	51.4341	31.3628	32.1092	82.0746
490	HNRNPR	2272.36	3843.31	2665.98	3252.81
491	ZNF436	153.274	239.994	107.336	183.461
492	ZNF436-AS1	13.3729	15.6814	16.5133	9.65584
493	RP5-1057J7.7	0	0.6818	0	0
494	TCEA3	109.04	22.4994	2.75222	2.41396
495	ASAP3	116.241	59.9984	124.767	60.349
496	E2F2	135.786	129.542	183.481	178.633
497	RP1-150O5.3	2.05736	0	0.917406	2.41396
498	ID3	218.081	107.043	15.5959	49.4862
499	RPL11	6992.98	7942.97	7430.99	4706.02
500	TCEB3	1099.66	2316.08	1120.15	1100.77
501	TCEB3-AS1	27.7744	14.9996	16.5133	7.24188
502	PITHD1	379.584	604.075	325.679	362.094
503	LYPLA2	210.88	210.676	143.115	48.2792
504	GALE	1270.42	957.248	544.022	101.386
505	HMGCL	276.715	135.678	198.16	74.8328
506	FUCA1	503.025	603.393	538.517	336.747
507	CNR2	0	0	0.917406	1.20698
508	BTBD6P1	0	0	0.917406	1.20698
509	RP11-4M23.4	0	0	0	1.20698
510	PNRC2	855.863	1641.78	501.821	790.572
511	SRSF10	1811.51	2747.66	1544.91	2784.5
512	MYOM3	0	0	0.917406	0
513	IL22RA1	4.11473	6.1362	0	0
514	IFNLR1	116.241	89.3158	0	1.20698
515	GRHL3	1.02868	2.7272	1.83481	0
516	STPG1	100.811	108.406	132.106	97.7654
517	NIPAL3	528.742	282.265	620.166	569.695
518	RCAN3	346.666	558.394	307.331	497.276
519	SRRM1	1333.17	1161.79	748.603	1227.5
520	CLIC4	3217.72	3135.6	2885.24	1885.3
521	RNU6-1208P	3.08605	0	0.917406	4.82792
522	RUNX3	327.121	297.947	855.022	471.929
523	MIR6731	0	1.3636	0.917406	0
524	RP11-84D1.1	12.3442	9.5452	40.3659	30.1745
525	RP11-84D1.2	0	0.6818	0	0
526	MIR4425	1.02868	0.6818	0	0
527	SYF2	412.501	498.396	460.538	416.408
528	RSRP1	303.461	397.49	239.443	308.987
529	RP3-465N24.6	5.14341	3.409	0.917406	2.41396
530	RP3-465N24.5	1.02868	0	0	0
531	RHD	4.11473	0	0	0
532	SDHDP6	0	3.409	6.42184	0
533	RP11-335G20.7	0	0	1.83481	0
534	TMEM50A	721.106	869.977	471.547	837.644
535	RHCE	5.14341	2.7272	0.917406	2.41396
536	RP3-469D22.1	1.02868	1.3636	3.66962	0
537	TMEM57	360.039	535.213	483.473	602.283
538	LDLRAP1	554.459	406.353	159.629	129.147
539	RP11-70P17.1	6.17209	2.7272	1.83481	0
540	MAN1C1	139.901	86.5886	2.75222	2.41396
541	RP1-187B23.1	4.11473	0.6818	0	0
542	SEPN1	1272.48	348.4	1107.31	346.403
543	RP1-317E23.3	3.08605	3.409	8.25665	6.0349
544	MTFR1L	485.538	363.4	437.603	333.126
545	AUNIP	224.253	359.991	158.711	229.326
546	RP1-125I3.2	1.02868	4.7726	0	0
547	PAQR7	53.4915	63.4074	46.7877	24.1396
548	Y_RNA	0	0	0	0
549	STMN1	2753.78	3580.13	1727.48	3970.96
550	SNRPFP2	0	0.6818	0	1.20698
551	RP1-125I3.4	2.05736	0.6818	1.83481	0
552	PAFAH2	236.597	282.265	143.115	109.835
553	SCARNA17	0	0.6818	0	0
554	EXTL1	30.8605	42.2716	413.75	130.354
555	SLC30A2	5.14341	4.0908	37.6136	13.2768
556	TRIM63	526.685	1081.34	111.006	55.5211
557	PDIK1L	182.077	258.402	193.573	254.673
558	FAM110D	1.02868	7.4998	0	0
559	RP11-96L14.7	2.05736	0.6818	0	0
560	ZNF593	3.08605	4.0908	3.66962	1.20698
561	CNKSR1	5.14341	1.3636	2.75222	0
562	RP11-231P20.2	0	0	3.66962	0
563	CEP85	596.635	664.755	616.497	556.418
564	RP11-231P20.5	2.05736	2.0454	1.83481	3.62094
565	SH3BGRL3	313.748	246.13	374.302	208.808
566	UBXN11	70.979	40.908	96.3276	16.8977
567	CD52	8.22945	0.6818	0	0
568	AIM1L	1.02868	0	3.66962	4.82792
569	LIN28A	0	4.0908	0.917406	3.62094
570	DHDDS	411.473	605.439	509.16	357.266
571	RP3-476K8.4	5.14341	4.0908	4.58703	2.41396
572	RP3-476K8.3	5.14341	2.0454	2.75222	6.0349
573	HMGN2	1165.5	3316.96	1187.12	1771.85
574	RPS6KA1	370.325	304.083	221.095	142.424
575	RP5-968P14.2	9.25814	8.1816	11.9263	9.65584
576	ARID1A	1340.37	495.669	842.179	773.674
577	PIGV	191.335	92.7248	227.517	167.77
578	RN7SL165P	0	0	0	0
579	ZDHHC18	193.392	174.541	201.829	98.9724
580	SFN	1.02868	0	0	0
581	GPN2	191.335	232.494	212.838	141.217
582	GPATCH3	79.2085	89.3158	95.4102	47.0722
583	NUDC	858.949	1157.7	1169.69	669.874
584	NR0B2	0	0	0	0
585	KDF1	0	0	0.917406	2.41396
586	RPL12P13	0	0.6818	0.917406	0
587	OSTCP2	0	0.6818	0.917406	1.20698
588	TRNP1	34.9752	28.6356	180.729	137.596
589	FAM46B	37.0325	27.9538	4.58703	3.62094
590	AL137860.1	0	0.6818	0	0
591	SLC9A1	320.949	154.769	205.499	78.4537
592	CHCHD3P3	1.02868	4.0908	8.25665	1.20698
593	NPM1P39	12.3442	19.0904	17.4307	12.0698
594	WDTC1	316.834	128.178	329.349	118.284
595	Y_RNA	1.02868	0	0	0
596	RP11-4K3__A.3	0	0	1.83481	1.20698
597	TMEM222	165.618	138.405	137.611	27.7605
598	RNU6-48P	0	1.3636	0	4.82792
599	ACTG1P20	6.17209	1.3636	3.66962	2.41396
600	SYTL1	4.11473	3.409	4.58703	1.20698
601	MAP3K6	132.7	95.452	144.033	37.4164
602	RP1-144C9.2	1.02868	1.3636	0	0
603	GPR3	61.7209	58.6348	86.2362	66.3839
604	WASF2	1953.47	797.706	1074.28	1146.63
605	RP4-752I6.1	3.08605	0.6818	1.83481	3.62094
606	RP1-159A19.4	0	0	0	0
607	AHDC1	80.2372	55.9076	26.6048	19.3117
608	FGR	0	0.6818	0	1.20698
609	RP1-159A19.3	4.11473	6.1362	11.0089	1.20698
610	RP11-288L9.1	1.02868	1.3636	0	0
611	IFI6	301.404	353.854	143.115	153.286
612	RP11-288L9.4	5.14341	0.6818	0.917406	0
613	FAM76A	123.442	285.674	139.446	178.633
614	RP3-426I6.2	1.02868	3.409	0.917406	4.82792
615	RPEP3	0	1.3636	0.917406	0
616	STX12	627.496	661.346	363.293	630.044
617	RP3-426I6.5	2.05736	0.6818	0	1.20698
618	AL020997.1	1.02868	0	0	0
619	RP3-426I6.6	0	2.0454	1.83481	3.62094
620	PPP1R8	449.534	765.662	539.435	482.792
621	SCARNA1	12.3442	6.818	7.33925	14.4838
622	THEMIS2	67.893	66.8164	31.1918	28.9675
623	RPA2	423.817	1055.43	380.723	587.799
624	SMPDL3B	6.17209	0.6818	0	0
625	RP11-460I13.2	0	0.6818	0	0
626	XKR8	54.5201	21.1358	0	2.41396
627	EYA3	2164.35	2246.53	365.128	595.041
628	RP11-460I13.6	1.02868	2.0454	1.83481	0
629	RN7SL559P	9.25814	5.4544	2.75222	2.41396
630	SPCS2P4	2.05736	0.6818	8.25665	4.82792
631	RP5-1053E7.3	1.02868	0	0.917406	0
632	PTAFR	1.02868	4.7726	2.75222	4.82792
633	DNAJC8	1225.16	2124.49	1069.7	1354.23
634	ATPIF1	263.343	381.808	173.39	226.912
635	RP5-1092A3.4	3.08605	3.409	4.58703	3.62094
636	RP5-1092A3.5	0	0	0.917406	0
637	SESN2	219.109	109.77	425.676	41.0373
638	MED18	159.446	172.495	124.767	135.182
639	PHACTR4	595.607	475.215	536.682	634.872
640	Y_RNA	0	1.3636	0	8.44886
641	RP1-308E4.1	1.02868	0.6818	0	1.20698
642	RNU6ATAC27P	2.05736	1.3636	0.917406	1.20698
643	RCC1	829.118	1165.2	652.276	529.864
644	SNHG3	1040	1203.38	1298.13	1007.83
645	SNORA73B	5606.32	2267.67	4533.82	2013.24
646	PRDX3P2	1.02868	5.4544	5.50444	13.2768
647	RP4-669K10.8	3.08605	2.7272	11.9263	25.3466
648	TRNAU1AP	216.023	339.537	134.859	129.147
649	SNHG12	287.002	327.946	256.874	292.089
650	SNORD99	14.4015	19.0904	10.0915	9.65584
651	TAF12	196.478	330.673	168.803	140.01
652	RAB42	42.176	17.7268	1.83481	0
653	RP11-442N24__B.1	6.17209	10.227	7.33925	1.20698
654	RNU11	1.02868	2.7272	0	0
655	GMEB1	213.966	237.948	126.602	241.396
656	SCARNA24	0	0	0	1.20698
657	YTHDF2	1925.69	2200.85	1205.47	1817.71
658	OPRD1	342.551	293.174	0	1.20698
659	Y_RNA	0	1.3636	0	0
660	EPB41	1399.01	1259.29	736.677	614.353
661	RP4-604A21.1	4.11473	0	8.25665	1.20698
662	Metazoa_SRP	0	0	0	0
663	TMEM200B	11.3155	12.9542	0.917406	1.20698
664	RP11-242O24.3	3.08605	2.0454	3.66962	2.41396
665	SRSF4	761.225	794.297	542.187	789.365
666	MECR	236.597	177.95	227.517	77.2467
667	RP11-467D18.2	7.20077	6.1362	7.33925	0
668	PTPRU	62.7496	271.357	38.531	6.0349
669	RP3-437I16.1	1.02868	4.0908	0	0
670	RP4-656G21.1	0	0	1.83481	1.20698
671	RP4-591L5.1	0	0	0.917406	0
672	RP4-591L5.2	0	0	0	0
673	MATN1	2.05736	6.1362	4.58703	0
674	MATN1-AS1	18.5163	5.4544	28.4396	16.8977
675	LAPTM5	4.11473	1.3636	148.62	240.189
676	RP5-1125N11.1	23.6597	33.4082	119.263	101.386
677	RP5-1125N11.2	0	4.7726	4.58703	8.44886
678	RN7SKP91	1.02868	0	2.75222	0
679	RP1-65J11.5	0	1.3636	0	0
680	SDC3	4512.83	4216.25	3171.47	1057.31
681	PUM1	1393.86	1335.65	1336.66	1075.42
682	RP11-201O14.1	2.05736	3.409	2.75222	9.65584
683	RP11-201O14.2	1.02868	0.6818	1.83481	0
684	RP11-490K7.1	0	0	0.917406	0
685	NKAIN1	1.02868	4.0908	9.17406	6.0349
686	SNRNP40	841.462	1537.46	715.577	878.681
687	RP11-490K7.4	7.20077	8.8634	4.58703	12.0698
688	ZCCHC17	418.673	1142.02	432.098	514.173
689	RP11-266K22.2	1.02868	2.0454	0.917406	4.82792
690	FABP3	120.356	112.497	19.2655	21.7256
691	SERINC2	92.5814	22.4994	17.4307	3.62094
692	RP11-439L8.2	4.11473	0	0	0
693	LINC01226	0	0	0	0
694	TINAGL1	17.4876	13.636	0.917406	0
695	HCRTR1	0	1.3636	0.917406	3.62094
696	PEF1	328.149	400.217	321.092	153.286
697	RP11-73M7.6	2.05736	2.0454	8.25665	3.62094
698	RP11-73M7.9	0	0	0	0
699	COL16A1	4.11473	24.5448	177.977	37.4164
700	ADGRB2	16.4589	4.0908	35.7788	6.0349
701	MIR4254	0	0	0	0
702	RP11-84A19.3	0	0	0	0
703	SPOCD1	1.02868	4.7726	3.66962	1.20698
704	RP11-84A19.2	0	0.6818	0	0
705	RP11-84A19.4	6.17209	5.4544	2.75222	8.44886
706	PTP4A2	1954.5	3574	2410.94	2960.72
707	AL136115.1	1.02868	1.3636	0.917406	1.20698
708	RP4-534N18.2	9.25814	3.409	3.66962	0
709	KHDRBS1	2426.66	919.067	1099.97	2208.77
710	RP11-277A4.4	5.14341	1.3636	2.75222	12.0698
711	TMEM39B	86.4093	49.7714	55.0444	38.6234
712	MIR5585	0	0	0	1.20698
713	KPNA6	1786.82	2547.21	1985.27	2048.25
714	TXLNA	1484.39	2408.8	1877.93	1436.31
715	CCDC28B	45.262	19.7722	22.9351	8.44886
716	RP4-622L5.7	0	0	1.83481	0
717	IQCC	52.4628	55.9076	42.2007	43.4513
718	DCDC2B	9.25814	2.0454	17.4307	8.44886
719	TMEM234	85.3806	86.5886	52.2921	42.2443
720	EIF3I	3436.83	4448.75	3019.18	2085.66
721	MTMR9LP	125.499	70.2254	267.883	68.7979
722	FAM167B	428.96	169.086	88.071	7.24188
723	LCK	1.02868	0	0	0
724	HDAC1	1473.07	2232.21	1159.6	1200.95
725	MARCKSL1	817.802	880.204	808.235	926.961
726	RP4-811H24.9	3.08605	1.3636	0	0
727	TSSK3	30.8605	5.4544	11.9263	9.65584
728	FAM229A	15.4302	7.4998	20.1829	8.44886
729	BSDC1	354.895	432.943	521.087	302.952
730	GAPDHP20	0	0.6818	0	0
731	RP11-395N6.4	0	0	0	1.20698
732	LRRC37A12P	0	0	0	0
733	RN7SL122P	1.02868	0.6818	0	0
734	ZBTB8B	22.631	34.7718	7.33925	9.65584
735	ZBTB8A	57.6062	95.452	68.8054	88.1095
736	ZBTB8OS	298.318	482.715	255.039	421.236
737	Y_RNA	1.02868	0.6818	0	0
738	RBBP4	2890.6	1954.04	1590.78	3215.39
739	SYNC	9.25814	12.9542	21.1003	10.8628
740	RP11-114B7.6	0	0	0	0
741	KIAA1522	329.178	118.633	164.216	82.0746
742	YARS	2681.77	2714.93	5547.55	1666.84
743	S100PBP	587.377	587.03	322.009	450.204
744	FNDC5	7.20077	5.4544	6.42184	3.62094
745	HPCA	3.08605	0.6818	0.917406	1.20698
746	TMEM54	56.5775	19.7722	21.1003	2.41396
747	RNF19B	526.685	708.391	262.378	195.531
748	RP5-1174N9.2	1.02868	0.6818	0	0
749	RP4-803A2.1	1.02868	1.3636	0.917406	0
750	RP4-803A2.2	6.17209	5.4544	1.83481	1.20698
751	RP1-117O3.2	14.4015	8.8634	17.4307	24.1396
752	AK2	2560.39	4184.89	2866.89	2522.59
753	Metazoa_SRP	5.14341	8.1816	1.83481	3.62094
754	AZIN2	28.8031	80.4524	54.1269	18.1047
755	RP11-131M11.2	3.08605	2.0454	11.0089	8.44886
756	TRIM62	148.13	108.406	129.354	35.0024
757	RP11-131M11.3	9.25814	6.818	10.0915	4.82792
758	ZNF362	244.826	141.133	126.602	61.556
759	RP11-415J8.7	8.22945	5.4544	5.50444	8.44886
760	A3GALT2	2.05736	0.6818	0.917406	1.20698
761	RP11-415J8.3	130.643	46.3624	41.2833	80.8677
762	PHC2	2363.91	1652.68	1594.45	401.924
763	AL513327.1	8.22945	3.409	6.42184	1.20698
764	RN7SKP16	9.25814	1.3636	5.50444	8.44886
765	RP11-415J8.5	18.5163	5.4544	2.75222	2.41396
766	ZSCAN20	152.245	145.905	101.832	119.491
767	RP4-580O19.2	0	0	0	0
768	CSMD2	1.02868	0.6818	0	0
769	SMIM12	362.096	604.757	356.871	403.131
770	GJB5	0	0	0	0
771	GJB4	0	0	0	0
772	GJB3	0	0	0	0
773	GJA4	1.02868	0	0	1.20698
774	RP5-997D16.2	4.11473	7.4998	18.3481	10.8628
775	DLGAP3	0	0.6818	4.58703	0
776	RP11-244H3.1	7.20077	4.0908	11.0089	4.82792
777	ZMYM6NB	0	0	1.83481	0
778	ZMYM6	170.761	175.223	140.363	222.084
779	ZMYM1	575.033	839.978	385.31	640.906
780	EFCAB14P1	1.02868	1.3636	1.83481	0
781	SFPQ	4643.47	8313.19	4751.25	6340.27
782	Y_RNA	0	0	0	0
783	ZMYM4	1608.86	1773.36	1474.27	1808.06
784	RN7SL503P	2.05736	0.6818	0	0
785	SNORA62	0	0	1.83481	0
786	RPL5P4	11.3155	29.3174	21.1003	27.7605
787	ZMYM4-AS1	3.08605	0.6818	0	1.20698
788	KIAA0319L	1475.13	1198.6	855.022	617.974
789	RP4-728D4.3	2.05736	0.6818	0.917406	3.62094
790	NCDN	171.79	191.586	138.528	51.9001
791	RP4-728D4.2	1.02868	0	2.75222	0
792	TFAP2E	16.4589	20.454	21.1003	16.8977
793	PSMB2	1885.57	2027.67	845.848	1179.22
794	C1orf216	259.228	426.125	343.11	334.333
795	CLSPN	1067.77	2397.89	536.682	1190.08
796	RP11-435D7.3	1.02868	0.6818	1.83481	6.0349
797	AGO4	648.07	424.762	442.19	424.857
798	AGO1	2022.39	1390.19	1068.78	1299.92
799	RP4-789D17.4	0	0	0	0
800	AGO3	813.687	687.937	385.31	556.418
801	RP4-665N4.8	3.08605	2.0454	2.75222	3.62094
802	TEKT2	2.05736	0.6818	0	0
803	ADPRHL2	227.339	290.447	146.785	47.0722
804	COL8A2	4.11473	3.409	3.66962	1.20698
805	TRAPPC3	655.27	1032.25	417.42	486.413
806	MAP7D1	465.993	687.937	477.051	175.012
807	THRAP3	2667.37	3481.95	2165.08	2499.66
808	UBE2V2P4	4.11473	1.3636	2.75222	4.82792
809	AL360074.1	0	0	0	1.20698
810	SH3D21	116.241	104.315	19.2655	12.0698
811	EVA1B	13.3729	10.9088	0	0
812	RP11-268J15.5	9.25814	6.1362	5.50444	6.0349
813	STK40	621.324	530.441	516.5	129.147
814	LSM10	158.417	70.2254	87.1536	60.349
815	RNU4-27P	0	1.3636	0.917406	0
816	OSCP1	86.4093	63.4074	43.1181	44.6583
817	SNORA63	4.11473	0.6818	0	3.62094
818	MRPS15	1295.11	1311.1	710.99	739.879
819	CSF3R	0	0	0.917406	1.20698
820	GRIK3	6.17209	0.6818	0	0
821	LINC01137	4.11473	1.3636	12.8437	4.82792
822	ZC3H12A	20.5736	19.7722	18.3481	8.44886
823	MEAF6	566.804	871.341	359.623	436.927
824	MIR5581	4.11473	2.7272	0	1.20698
825	SNIP1	203.679	399.535	161.463	224.498
826	FTH1P1	4.11473	1.3636	3.66962	1.20698
827	RP3-423B22.5	8.22945	1.3636	1.83481	4.82792
828	DNALI1	10.2868	25.2266	38.531	21.7256
829	GNL2	1366.09	2385.62	1244.92	1262.5
830	C1orf109	294.203	632.711	259.626	265.536
831	CDCA8	759.167	965.429	348.614	400.717
832	EPHA10	6.17209	2.7272	7.33925	2.41396
833	MANEAL	213.966	136.36	120.18	94.1444
834	YRDC	421.76	557.031	363.293	316.229
835	C1orf122	188.249	142.496	103.667	42.2443
836	MTF1	327.121	309.537	242.195	417.615
837	RP11-109P14.8	0	0	0	1.20698
838	INPP5B	1041.03	611.575	644.936	333.126
839	SNORA63	1.02868	0.6818	0	6.0349
840	RNU6-584P	1.02868	0.6818	0	0
841	SF3A3	2104.68	4045.12	1626.56	1767.02
842	RNU6-510P	1.02868	1.3636	0.917406	1.20698
843	FHL3	112.126	59.3166	44.9529	16.8977
844	UTP11L	813.687	1568.82	608.24	760.397
845	POU3F1	7.20077	13.636	8.25665	0
846	RP5-884C9.2	0	0	0	0
847	RP5-884C9.3	0	0	0	0
848	LINC01343	0	0.6818	0	0
849	RP11-334L9.1	4.11473	0.6818	0.917406	6.0349
850	RRAGC	412.501	261.13	183.481	447.79
851	RP5-864K19.4	2.05736	2.7272	10.0915	2.41396
852	MYCBP	232.482	379.763	98.1624	149.666
853	RP5-864K19.6	0	0	0	0
854	GJA9	0	0	1.83481	1.20698
855	RHBDL2	0	1.3636	3.66962	20.5187
856	AKIRIN1	1545.08	2541.07	806.4	897.993
857	NDUFS5	1657.21	2240.4	770.621	949.893
858	MACF1	13581.7	8217.06	6048.46	7549.66
859	RNU6-608P	0	1.3636	0.917406	1.20698
860	RNA5SP44	1.02868	0	1.83481	2.41396
861	RP11-416A14.1	2.05736	2.0454	0	0
862	RP11-420K8.1	3.08605	0	1.83481	1.20698
863	HSPE1P8	3.08605	2.7272	0	0
864	BMP8A	4.11473	0.6818	0.917406	0
865	OXCT2P1	3.08605	0.6818	0	1.20698
866	RP11-69E11.4	10.2868	12.2724	16.5133	4.82792
867	PPIEL	12.3442	15.6814	7.33925	8.44886
868	PABPC4	4175.42	2745.61	1600.87	1666.84
869	RP11-69E11.8	18.5163	33.4082	15.5959	20.5187
870	SNORA55	11.3155	13.636	8.25665	9.65584
871	NT5C1A	5.14341	2.7272	0	0
872	HPCAL4	62.7496	202.495	10.0915	12.0698
873	PPIE	582.234	623.165	366.962	296.917
874	RP1-144F13.4	1.02868	0	0	1.20698
875	BMP8B	240.712	325.219	751.355	469.515
876	OXCT2	4.11473	4.0908	1.83481	2.41396
877	RP1-118J21.25	2.05736	2.7272	2.75222	0
878	TRIT1	584.291	616.347	436.685	442.962
879	Y_RNA	8.22945	1.3636	2.75222	2.41396
880	MYCL	21.6023	13.636	51.3747	10.8628
881	RP1-118J21.5	0	0	0.917406	0
882	MFSD2A	109.04	185.45	68.8054	51.9001
883	RP3-342P20.2	8.22945	2.7272	23.8526	3.62094
884	CAP1	8642.98	16670	3599.9	3932.34
885	PPT1	3127.19	3194.23	1635.73	2323.44
886	RLF	1229.27	1412.69	520.169	1077.83
887	RNU6-1237P	0	0	0.917406	1.20698
888	TMCO2	0	0.6818	0.917406	2.41396
889	RP1-39G22.7	38.0612	48.4078	62.3836	55.5211
890	ZMPSTE24	872.322	1907	999.972	2166.53
891	RP1-39G22.4	4.11473	3.409	1.83481	3.62094
892	COL9A2	31.8891	20.454	0.917406	2.41396
893	RP1-228H13.1	0	0	7.33925	2.41396
894	SMAP2	522.57	587.712	440.355	519.001
895	ZFP69B	69.9504	49.0896	12.8437	21.7256
896	RP1-228H13.5	7.20077	2.7272	8.25665	6.0349
897	RP11-656D10.7	0	0	0.917406	0
898	ZFP69	99.7821	50.4532	0.917406	0
899	RP11-656D10.3	2.05736	0	0.917406	1.20698
900	EXO5	3.08605	0	6.42184	7.24188
901	RP11-656D10.6	0	0	1.83481	1.20698
902	ZNF684	100.811	117.27	53.2095	57.935
903	RIMS3	72.0077	11.5906	50.4573	30.1745
904	RP4-739H11.3	0	0	0.917406	0
905	NFYC-AS1	22.631	26.5902	25.6874	32.5885
906	NFYC	558.574	421.353	288.065	294.503
907	MIR30E	1.02868	0.6818	0	0
908	MIR30C1	0	0.6818	0.917406	0
909	KCNQ4	31.8891	5.4544	13.7611	0
910	CITED4	1.02868	0	10.0915	1.20698
911	RP5-1066H13.4	0	0	0.917406	0
912	CTPS1	2156.12	1363.6	916.489	1337.33
913	SLFNL1-AS1	38.0612	16.3632	21.1003	12.0698
914	SLFNL1	25.717	7.4998	23.8526	24.1396
915	SCMH1	549.316	300.674	427.511	243.81
916	RPL23AP17	1.02868	0	0	2.41396
917	RP11-399E6.1	0	0	11.0089	8.44886
918	RP11-399E6.2	0	0	0	2.41396
919	FOXO6	4.11473	6.1362	0	0
920	RP11-399E6.4	0	4.0908	0	0
921	HIVEP3	111.098	111.815	141.281	281.226
922	RP11-486B10.3	0	0	0	1.20698
923	RP11-486B10.4	7.20077	0	2.75222	10.8628
924	AL451006.1	0	0	0	3.62094
925	GUCA2A	2.05736	0	0	0
926	FOXJ3	1284.82	1797.23	780.712	1040.42
927	RP11-223A3.1	0	0	0	0
928	RIMKLA	8.22945	59.9984	12.8437	14.4838
929	RP11-157D18.2	0	0	0	0
930	ZMYND12	12.3442	19.7722	4.58703	4.82792
931	PPCS	510.226	638.847	330.266	397.096
932	CCDC30	8.22945	19.0904	25.6874	19.3117
933	RP11-163G10.2	0	0	0	0
934	TMSB4XP1	1.02868	0	0	1.20698
935	RP11-163G10.4	0	0	0.917406	0
936	PPIH	363.125	563.167	193.573	290.882
937	RP5-994D16.3	8.22945	10.227	3.66962	3.62094
938	YBX1	12529.3	17005.5	6685.14	5371.06
939	CLDN19	0	0	0.917406	0
940	P3H1	689.217	501.805	606.405	429.685
941	C1orf50	74.0651	81.816	56.8792	32.5885
942	RP5-994D16.9	12.3442	14.3178	13.7611	6.0349
943	RP5-994D16.11	0	0	1.83481	0
944	SVBP	59.6635	61.362	31.1918	37.4164
945	ERMAP	52.4628	59.9984	37.6136	44.6583
946	RP11-342M1.3	17.4876	21.1358	7.33925	7.24188
947	ZNF691	131.671	105.679	64.2184	54.3141
948	ATP6V1E1P1	0	2.0454	0	4.82792
949	SLC2A1	601.779	654.528	1171.53	1080.25
950	SLC2A1-AS1	8.22945	3.409	18.3481	8.44886
951	FAM183A	1.02868	2.0454	0.917406	0
952	EBNA1BP2	1078.06	2327.67	1125.66	1239.57
953	CFAP57	3.08605	4.0908	0.917406	0
954	TMEM125	3.08605	0	0	0
955	C1orf210	0	0	0	1.20698
956	TIE1	16.4589	6.1362	0	0
957	MPL	0	0.6818	0.917406	0
958	RP1-92O14.3	10.2868	6.1362	2.75222	1.20698
959	CDC20	1753.9	1805.41	513.747	568.488
960	ELOVL1	937.129	1199.29	499.069	403.131
961	MED8	702.59	971.565	417.42	310.194
962	RP1-92O14.6	9.25814	6.818	7.33925	6.0349
963	SZT2	1055.43	578.848	528.426	247.431
964	SZT2-AS1	0	0	0.917406	0
965	HYI	33.9465	53.1804	55.9618	33.7954
966	HYI-AS1	1.02868	0	1.83481	2.41396
967	PTPRF	603.836	314.992	1351.34	665.046
968	KDM4A	903.183	646.347	821.996	532.278
969	KDM4A-AS1	13.3729	22.4994	17.4307	20.5187
970	ST3GAL3	115.212	55.9076	111.924	84.4886
971	RP11-184I16.4	2.05736	1.3636	2.75222	4.82792
972	RP11-184I16.3	3.08605	0.6818	4.58703	4.82792
973	SHMT1P1	4.11473	0.6818	3.66962	3.62094
974	ARTN	1.02868	0	2.75222	1.20698
975	RP11-7O11.3	0	12.2724	9.17406	2.41396
976	IPO13	548.287	321.81	732.09	261.915
977	DPH2	340.494	477.26	366.962	184.668
978	ATP6V0B	1157.27	1193.15	721.998	269.157
979	B4GALT2	461.878	412.489	270.635	82.0746
980	CCDC24	11.3155	10.227	11.0089	4.82792
981	SLC6A9	16.4589	8.8634	8.25665	2.41396
982	RP5-1198O20.4	13.3729	15.6814	1.83481	3.62094
983	RP11-570P14.1	2.05736	0.6818	12.8437	4.82792
984	RP5-891H21.5	0	0	0.917406	0
985	DMAP1	316.834	173.177	106.419	82.0746
986	ERI3	464.964	460.215	381.641	210.015
987	ERI3-IT1	7.20077	3.409	0.917406	4.82792
988	AL390776.1	0	0.6818	0	1.20698
989	RNF220	314.777	301.356	329.349	141.217
990	TMEM53	96.6961	57.953	71.5577	22.9326
991	C1orf228	1.02868	2.0454	1.83481	0
992	RNU5F-1	203.679	249.539	31.1918	115.87
993	RNU5D-1	148.13	149.314	10.0915	61.556
994	KIF2C	1669.55	2138.13	1004.56	1223.88
995	RP11-269F19.2	8.22945	2.0454	4.58703	8.44886
996	RPS8	14376.9	10216.8	6727.34	3868.37
997	SNORD46	28.8031	55.2258	26.6048	8.44886
998	SNORD38A	7.20077	0.6818	1.83481	1.20698
999	RPS15AP11	2.05736	4.0908	8.25665	8.44886
1000	BEST4	1.02868	2.0454	1.83481	2.41396
1001	PLK3	109.04	188.177	230.269	42.2443
1002	TCTEX1D4	2.05736	0	3.66962	0
1003	BTBD19	55.5488	36.1354	121.098	49.4862
1004	PTCH2	22.631	31.3628	9.17406	8.44886
1005	RP5-882O7.1	6.17209	2.0454	0	1.20698
1006	EIF2B3	635.725	918.385	359.623	481.585
1007	AL136380.1	0	0	0	0
1008	RNA5SP47	0	0.6818	0	0
1009	CCNB1IP1P1	4.11473	0	0.917406	0
1010	RP5-882O7.4	0	0	0	1.20698
1011	MRPS17P1	0	0.6818	1.83481	0
1012	HECTD3	500.968	500.441	197.242	129.147
1013	UROD	1001.94	1250.42	710.99	266.743
1014	ZSWIM5	54.5201	86.5886	62.3836	24.1396
1015	OSTCP5	0	0	0	0
1016	LINC01144	8.22945	6.1362	5.50444	1.20698
1017	HPDL	356.953	292.492	13.7611	2.41396
1018	MUTYH	206.765	129.542	91.7406	36.2094
1019	TOE1	506.111	637.483	200.912	168.977
1020	TESK2	602.808	765.662	175.225	80.8677
1021	RP11-291L19.1	6.17209	2.0454	0	1.20698
1022	CCDC163P	32.9178	72.2708	75.2273	45.8652
1023	MMACHC	368.268	490.896	592.644	389.855
1024	PRDX1	4021.12	8159.79	1495.37	3302.3
1025	AKR1A1	3158.05	2281.3	482.556	158.114
1026	AL355480.3	0	1.3636	0.917406	1.20698
1027	AL355480.1	0	0.6818	0.917406	0
1028	NASP	1731.27	3585.59	1225.65	1356.65
1029	AL355480.2	1.02868	2.0454	0	0
1030	AL355480.4	1.02868	0	0	0
1031	CCDC17	14.4015	17.045	18.3481	12.0698
1032	GPBP1L1	1457.64	2397.21	1310.06	1273.36
1033	RPS15AP10	1.02868	5.4544	1.83481	14.4838
1034	RP11-767N6.2	16.4589	21.8176	3.66962	9.65584
1035	TMEM69	521.542	708.391	225.682	237.775
1036	IPP	353.867	381.126	158.711	136.389
1037	RP11-767N6.7	42.176	34.7718	5.50444	9.65584
1038	RP11-630I5.1	0	0	1.83481	1.20698
1039	MAST2	558.574	479.987	665.119	394.682
1040	TMA16P2	1.02868	1.3636	0.917406	2.41396
1041	PIK3R3	545.201	1285.19	127.519	289.675
1042	RP4-533D7.4	4.11473	2.7272	2.75222	4.82792
1043	RP4-533D7.3	0	1.3636	0	1.20698
1044	RP4-533D7.5	1.02868	1.3636	0	3.62094
1045	TSPAN1	5.14341	13.636	11.0089	7.24188
1046	AL672043.1	0	0	0	2.41396
1047	POMGNT1	1624.29	1881.77	1126.57	578.143
1048	LURAP1	63.7783	77.0434	0	0
1049	RAD54L	320.949	285.674	217.425	265.536
1050	LRRC41	571.947	744.526	631.175	321.057
1051	UQCRH	2812.42	4002.85	1773.35	2085.66
1052	NSUN4	481.423	539.986	303.661	316.229
1053	RP4-603I14.3	0	0	0	1.20698
1054	FAAH	9.25814	3.409	0.917406	1.20698
1055	FAAHP1	8.22945	2.0454	1.83481	0
1056	LINC01398	2.05736	0.6818	0	0
1057	DMBX1	4.11473	0	11.0089	9.65584
1058	MKNK1-AS1	3.08605	5.4544	4.58703	2.41396
1059	KNCN	1.02868	0	0	0
1060	MKNK1	261.285	298.629	162.381	171.391
1061	MOB3C	59.6635	109.77	122.932	55.5211
1062	ATPAF1	918.613	1731.09	760.529	1018.69
1063	NENFP1	0	0.6818	1.83481	0
1064	TEX38	1.02868	0	0.917406	0
1065	EFCAB14-AS1	7.20077	2.7272	4.58703	6.0349
1066	EFCAB14	1727.16	2864.92	1153.18	1905.82
1067	CYP4A11	0	0.6818	0	2.41396
1068	CYP4X1	0	0	0	0
1069	CYP4Z1	0	0	0	1.20698
1070	CYP4A22-AS1	4.11473	1.3636	0.917406	0
1071	CYP4A22	3.08605	0	0	1.20698
1072	MTND1P34	0	0	0	1.20698
1073	LINC00853	1.02868	0.6818	2.75222	0
1074	TAL1	0	0.6818	0	1.20698
1075	STIL	572.976	1361.56	497.234	1363.89
1076	CMPK1	902.154	2417.66	1112.81	2252.22
1077	LINC01389	0	1.3636	7.33925	7.24188
1078	FOXE3	0	0	0	1.20698
1079	FOXD2-AS1	15.4302	6.818	41.2833	19.3117
1080	FOXD2	12.3442	10.227	51.3747	41.0373
1081	TRABD2B	1.02868	0.6818	3.66962	3.62094
1082	RP11-330M19.1	0	0	0	4.82792
1083	SKINTL	0	0	0	0
1084	RP5-1024N4.2	1.02868	0.6818	0	0
1085	SLC5A9	156.36	127.497	1.83481	8.44886
1086	RP5-1024N4.4	0	0	0	1.20698
1087	SPATA6	203.679	240.676	62.3836	156.907
1088	PPP1R8P1	2.05736	2.7272	0.917406	0
1089	RNU6-723P	2.05736	1.3636	0.917406	0
1090	RP11-329A14.1	9.25814	3.409	1.83481	4.82792
1091	RNU4-61P	0	0	0	0
1092	AGBL4	0	0.6818	0.917406	1.20698
1093	BEND5	2.05736	3.409	0	2.41396
1094	ELAVL4	2.05736	6.818	104.584	73.6258
1095	RP11-183G22.1	3.08605	0	0	0
1096	FCF1P6	1.02868	0	0.917406	0
1097	DMRTA2	0	0	0	0
1098	FAF1	818.831	1317.24	1149.51	1168.36
1099	RP5-850O15.3	5.14341	4.7726	6.42184	22.9326
1100	Y_RNA	1.02868	0	0	2.41396
1101	RNU6-1026P	2.05736	0	1.83481	1.20698
1102	PHBP12	9.25814	6.818	4.58703	12.0698
1103	MRPS6P2	1.02868	0.6818	0	2.41396
1104	CDKN2C	53.4915	92.043	176.142	254.673
1105	MIR4421	0	0	0	0
1106	CFL1P2	1.02868	0	0	2.41396
1107	LINC01562	0	0	0	0
1108	RNF11	666.586	1619.96	832.087	1471.31
1109	RP11-296A18.5	1.02868	0	2.75222	1.20698
1110	RP11-296A18.6	0	0	1.83481	2.41396
1111	TTC39A	125.499	340.218	6.42184	9.65584
1112	EPS15	1565.65	2006.54	933.919	1233.53
1113	RP11-275F13.3	7.20077	1.3636	2.75222	4.82792
1114	RNU6-877P	1.02868	0	0.917406	0
1115	RP11-253A20.1	2.05736	4.0908	0.917406	3.62094
1116	RP11-191G24.1	0	0	0.917406	1.20698
1117	CALR4P	1.02868	0	0	0
1118	OSBPL9	2004.9	3306.05	1134.83	1716.33
1119	GAPDHP51	1.02868	2.7272	0	0
1120	SLC25A6P3	1.02868	0	0	0
1121	SNORA26	0	0	0.917406	0
1122	NRD1	1700.41	1481.55	1421.06	2135.15
1123	RP4-657D16.3	3.08605	4.7726	7.33925	16.8977
1124	RP4-657D16.6	2.05736	1.3636	0.917406	2.41396
1125	TSEN15P2	2.05736	0.6818	0.917406	2.41396
1126	RAB3B	4.11473	123.406	0	13.2768
1127	TXNDC12	660.414	1034.97	738.512	1095.94
1128	KTI12	80.2372	173.859	122.015	111.042
1129	RP11-91A18.4	2.05736	1.3636	0.917406	0
1130	TXNDC12-AS1	0	3.409	1.83481	1.20698
1131	BTF3L4	367.239	806.57	654.11	665.046
1132	ZFYVE9	399.129	578.167	632.093	626.423
1133	RN7SL788P	1.02868	0	0	0
1134	RP4-800M22.1	2.05736	2.0454	2.75222	0
1135	RP4-800M22.2	0	1.3636	0.917406	4.82792
1136	PDCL3P6	0	0	0	0
1137	RP4-800M22.4	1.02868	0	1.83481	0
1138	DNAJC19P7	1.02868	0	1.83481	0
1139	ANAPC10P1	0	0	0.917406	2.41396
1140	CC2D1B	483.48	634.074	309.166	172.598
1141	RP11-155O18.6	4.11473	4.0908	4.58703	1.20698
1142	PLA2G12AP1	1.02868	2.0454	1.83481	8.44886
1143	ORC1	366.211	762.253	175.225	346.403
1144	PRPF38A	336.379	584.303	370.632	619.181
1145	ZCCHC11	605.894	807.252	718.329	974.033
1146	RP11-25O10.2	0	0	0	0
1147	EEF1GP7	0	0	0	0
1148	GPX7	42.176	90.6794	0	0
1149	FAM159A	0	0.6818	0	1.20698
1150	COA7	341.522	919.749	565.122	650.562
1151	ZYG11B	794.142	1483.6	885.297	1256.47
1152	RPS13P2	13.3729	22.4994	22.0177	14.4838
1153	RNU6-969P	0	0.6818	1.83481	0
1154	ZYG11A	0	0	0.917406	2.41396
1155	RP4-631H13.2	0	0	0	0
1156	ECHDC2	25.717	8.8634	33.0266	39.8303
1157	RP4-631H13.6	0	0.6818	0	0
1158	RP4-631H13.4	0	0	0	0
1159	SCP2	492.739	747.935	646.771	901.614
1160	MIR1273F	0	1.3636	0	0
1161	RP4-631H13.5	0	0.6818	0	0
1162	RP11-334A14.2	0	0	2.75222	0
1163	AL445183.1	0	0.6818	0.917406	1.20698
1164	PODN	6.17209	3.409	0	1.20698
1165	SLC1A7	0	0	0	0
1166	RP11-334A14.8	0	0	0	0
1167	CPT2	188.249	240.676	187.151	150.873
1168	RP5-1024G6.2	3.08605	1.3636	0	1.20698
1169	C1orf123	177.962	235.903	217.425	193.117
1170	RP5-1024G6.7	4.11473	2.7272	4.58703	1.20698
1171	MAGOH	141.958	271.357	253.204	276.398
1172	RP5-1024G6.5	4.11473	2.0454	9.17406	6.0349
1173	LRP8	633.668	873.386	1752.25	1897.37
1174	RP4-784A16.2	3.08605	0	0.917406	1.20698
1175	RP4-784A16.3	1.02868	3.409	0	3.62094
1176	RP4-784A16.4	4.11473	7.4998	1.83481	16.8977
1177	RP4-784A16.5	1.02868	5.4544	10.0915	8.44886
1178	GLIS1	0	0	0	0
1179	NDC1	1335.23	2926.97	958.689	2142.39
1180	SNORA58	0	1.3636	0	1.20698
1181	YIPF1	192.363	299.31	259.626	248.638
1182	DIO1	0	0.6818	2.75222	9.65584
1183	HSPB11	165.618	473.169	116.511	383.82
1184	LRRC42	228.367	454.761	206.416	337.954
1185	HNRNPA3P12	4.11473	0	2.75222	2.41396
1186	TMEM59	1056.46	2231.53	1052.26	1803.23
1187	RP4-758J24.6	2.05736	2.7272	3.66962	1.20698
1188	TCEANC2	157.388	347.718	151.372	166.563
1189	RP4-758J24.4	0	0.6818	0	0
1190	CDCP2	0	0	0	0
1191	RP11-446E24.3	1.02868	0.6818	0	0
1192	RP11-446E24.4	0	0	0	0
1193	CYB5RL	77.1511	66.1346	109.171	48.2792
1194	MRPL37	845.576	1436.55	1103.64	869.026
1195	SSBP3	168.704	191.586	166.968	113.456
1196	SSBP3-AS1	8.22945	4.7726	4.58703	6.0349
1197	RP5-997D24.3	2.05736	1.3636	1.83481	0
1198	ACOT11	27.7744	27.272	0.917406	1.20698
1199	FAM151A	1.02868	2.0454	0	1.20698
1200	MROH7	1.02868	0	0	0
1201	MROH7-TTC4	0	0	0.917406	0
1202	TTC4	11.3155	11.5906	22.9351	12.0698
1203	PARS2	84.3519	96.1338	97.245	56.7281
1204	LEXM	0	0	0.917406	0
1205	DHCR24	2767.15	2725.84	1488.95	1907.03
1206	RP11-67L3.5	0	1.3636	1.83481	0
1207	RP11-67L3.4	0	2.0454	0.917406	2.41396
1208	PCSK9	0	0.6818	4.58703	4.82792
1209	USP24	2007.99	2557.43	1709.13	2284.81
1210	RP11-101C11.1	0	0	0	0
1211	GYG1P3	0	0	0.917406	1.20698
1212	GOT2P1	1.02868	0	0	0
1213	RP4-633H17.2	0	0	0	0
1214	RN7SKP291	0	0	0	0
1215	RP11-90C4.1	6.17209	7.4998	0.917406	0
1216	RPSAP20	0	0	0	0
1217	RP11-504A18.1	0	0.6818	0.917406	0
1218	AC119674.1	0	0.6818	0	0
1219	RP4-710M16.2	0	0.6818	0	7.24188
1220	PLPP3	98.7535	453.397	273.387	217.256
1221	RPL21P23	0	0	2.75222	4.82792
1222	RP11-377K22.2	3.08605	0.6818	0.917406	1.20698
1223	PRKAA2	156.36	453.397	419.254	376.578
1224	C1orf168	0	0.6818	0.917406	2.41396
1225	C8A	5.14341	0	0	6.0349
1226	C8B	9.25814	0	0	8.44886
1227	DAB1	0	0	17.4307	45.8652
1228	RP6-102O10.1	0	0	0	1.20698
1229	DAB1-AS1	0	0	0.917406	0
1230	HNRNPA1P6	0	0	3.66962	0
1231	RPS26P15	1.02868	0.6818	0	0
1232	OMA1	273.629	439.079	200.912	258.294
1233	RP4-592A1.2	8.22945	4.7726	3.66962	6.0349
1234	MYSM1	553.431	741.117	928.415	1494.24
1235	AL136985.1	0	0	0	0
1236	JUN	17.4876	100.906	198.16	113.456
1237	LINC01135	0	0	0.917406	0
1238	RP11-63G10.3	1.02868	0	0.917406	0
1239	RP4-794H19.1	1.02868	5.4544	0.917406	1.20698
1240	LINC01358	0	0.6818	0	0
1241	PHBP3	3.08605	0	0.917406	1.20698
1242	FGGY	59.6635	51.8168	41.2833	49.4862
1243	RP4-782L23.2	0	0	0	0
1244	HOOK1	1.02868	1.3636	0	2.41396
1245	CYP2J2	31.8891	72.9526	0	2.41396
1246	C1orf87	0	0	0	0
1247	RP11-776H12.1	0	0	0	0
1248	RP11-436K8.1	1.02868	0	0	0
1249	NFIA	559.603	367.49	109.171	100.179
1250	NFIA-AS2	0	1.3636	0	0
1251	RP4-802A10.1	4.11473	0.6818	0	0
1252	NFIA-AS1	2.05736	1.3636	0	0
1253	RP11-430G17.1	0	0	0	0
1254	TM2D1	175.905	298.629	243.113	273.984
1255	RP11-430G17.3	1.02868	1.3636	0	1.20698
1256	INADL	230.425	192.949	386.228	237.775
1257	LAMTOR5P1	0	0	0	0
1258	RN7SL180P	0	0	0	0
1259	L1TD1	0	0	0	0
1260	USP1	914.498	2591.52	1601.79	2727.77
1261	DOCK7	2099.54	3025.83	2374.25	3355.4
1262	RP11-293K19.1	0	0	0.917406	0
1263	ANGPTL3	24.6884	6.818	12.8437	62.763
1264	RP5-849H19.3	9.25814	4.0908	8.25665	18.1047
1265	RP5-849H19.2	2.05736	4.7726	3.66962	3.62094
1266	RP11-230B22.1	4.11473	4.0908	3.66962	4.82792
1267	ATG4C	199.564	430.216	185.316	288.468
1268	RP4-771M4.3	0	0.6818	0	0
1269	RP11-5P4.1	0	0.6818	0	1.20698
1270	LINC00466	7.20077	8.1816	1.83481	1.20698
1271	RP11-335E6.3	3.08605	0	0	0
1272	RPSAP65	0	0	0	0
1273	FOXD3-AS1	25.717	27.272	14.6785	25.3466
1274	FOXD3	8.22945	37.499	28.4396	16.8977
1275	RP4-792G4.3	1.02868	0	0	0
1276	ALG6	339.465	610.211	167.885	334.333
1277	ITGB3BP	289.06	374.99	186.233	423.65
1278	EFCAB7	59.6635	102.952	108.254	160.528
1279	RNU7-123P	0	0.6818	0	1.20698
1280	DLEU2L	9.25814	6.818	21.1003	38.6234
1281	PGM1	1048.23	1317.24	1526.56	1379.58
1282	RN7SL130P	2.05736	4.0908	8.25665	4.82792
1283	ROR1	133.729	380.445	112.841	141.217
1284	RP4-597J3.1	4.11473	1.3636	1.83481	2.41396
1285	CFL1P3	1.02868	1.3636	0	0
1286	ROR1-AS1	8.22945	3.409	5.50444	9.65584
1287	UBE2U	2.05736	0.6818	0	0
1288	CACHD1	396.042	360.672	391.732	311.401
1289	RAVER2	207.794	433.625	388.063	499.69
1290	JAK1	1352.72	2001.08	1817.38	1900.99
1291	RP11-182I10.1	0	0	0	3.62094
1292	RP11-182I10.2	0	0.6818	2.75222	7.24188
1293	LINC01359	5.14341	3.409	4.58703	1.20698
1294	SLC2A3P2	5.14341	1.3636	0	1.20698
1295	RP4-535B20.4	2.05736	2.0454	0.917406	2.41396
1296	RNU6-1176P	0	0	0	0
1297	MIR3671	4.11473	1.3636	1.83481	0
1298	MIR101-1	0	0	0	0
1299	RP4-535B20.1	0	2.0454	0	0
1300	MRPS21P1	0	0	1.83481	0
1301	AK4	161.503	582.257	556.865	601.076
1302	RP4-700A9.1	1.02868	1.3636	0	0
1303	DNAJC6	17.4876	23.1812	282.561	470.722
1304	RP5-1044H5.1	1.02868	0	0	4.82792
1305	COX6CP13	0	0	0	2.41396
1306	LEPROT	447.477	1149.52	544.939	756.776
1307	LEPR	50.4054	53.8622	62.3836	97.7654
1308	RP4-630A11.3	0	0.6818	0	1.20698
1309	RP11-430H12.2	0	0	0.917406	0
1310	PDE4B	341.522	323.173	52.2921	113.456
1311	RP11-397C12.1	0	0	0	1.20698
1312	SGIP1	3.08605	0	0.917406	2.41396
1313	TCTEX1D1	36.0039	17.045	0	0
1314	WDR78	5.14341	4.0908	1.83481	4.82792
1315	MIER1	348.723	676.346	415.585	694.014
1316	SLC35D1	237.625	544.758	416.502	520.208
1317	RP4-547N15.3	0	0	0	0
1318	IL23R	49.3767	14.3178	0	0
1319	IL12RB2	952.559	585.666	765.117	861.784
1320	SERBP1	3162.17	6543.92	4220.98	5961.27
1321	RNU6-387P	0	2.7272	2.75222	2.41396
1322	RP11-393N21.2	0	0	0	0
1323	RP11-393N21.1	0	0	0	0
1324	GADD45A	119.327	437.716	293.57	149.666
1325	GNG12	3769.09	8780.91	4380.61	6323.37
1326	RNU7-80P	4.11473	1.3636	2.75222	2.41396
1327	GNG12-AS1	21.6023	19.0904	26.6048	43.4513
1328	RP4-609E1.2	0	0	0	0
1329	DIRAS3	0	0	0	3.62094
1330	AL157407.1	0	0	0	0
1331	WLS	574.004	951.111	1063.27	1024.73
1332	CTBP2P8	4.11473	2.0454	1.83481	2.41396
1333	MIR1262	0	0.6818	0.917406	2.41396
1334	RPS7P4	3.08605	0	3.66962	2.41396
1335	TCEB1P18	0	0	0	0
1336	RP5-1033K19.2	0	0	0	1.20698
1337	RPE65	3.08605	12.2724	0	0
1338	DEPDC1	871.293	1676.55	768.786	1592.01
1339	RP4-694A7.2	2.05736	6.1362	2.75222	9.65584
1340	DEPDC1-AS1	3.08605	5.4544	3.66962	8.44886
1341	LRRC7	6.17209	10.9088	8.25665	24.1396
1342	RN7SL538P	1.02868	0	0	0
1343	LRRC40	407.358	926.567	270.635	611.939
1344	RN7SL242P	2.05736	2.7272	0.917406	1.20698
1345	SRSF11	995.764	1591.32	1376.11	1921.51
1346	RP4-677H15.4	2.05736	2.0454	1.83481	4.82792
1347	ANKRD13C	228.367	618.393	435.768	644.527
1348	HHLA3	8.22945	5.4544	7.33925	4.82792
1349	RP11-180O5.2	0	0	0	1.20698
1350	CTH	169.732	204.54	104.584	50.6932
1351	Metazoa_SRP	2.05736	0	0	0
1352	RP11-42O15.3	8.22945	2.0454	0.917406	6.0349
1353	PTGER3	0	2.7272	0.917406	3.62094
1354	RP3-333A15.1	0	0	4.58703	4.82792
1355	ZRANB2-AS1	3.08605	4.7726	5.50444	8.44886
1356	ZRANB2	697.446	1002.93	758.695	1361.47
1357	MIR186	1.02868	2.0454	3.66962	9.65584
1358	ZRANB2-AS2	6.17209	6.818	2.75222	9.65584
1359	NEGR1	2.05736	2.0454	17.4307	111.042
1360	GDI2P2	3.08605	3.409	3.66962	6.0349
1361	RPL31P12	0	0	0.917406	0
1362	RP4-660H19.1	1.02868	0.6818	0	0
1363	RP11-262K1.1	0	0	0	0
1364	LINC01360	0	0	0.917406	0
1365	LRRIQ3	26.7457	46.3624	56.8792	71.2118
1366	FPGT	155.331	321.81	168.803	306.573
1367	FPGT-TNNI3K	1.02868	2.0454	2.75222	1.20698
1368	TNNI3K	0	0	0	0
1369	RP11-439H8.4	0	0	0	0
1370	ERICH3	0	0	2.75222	1.20698
1371	ERICH3-AS1	0	0	0	0
1372	RP11-17E13.2	1.02868	1.3636	0.917406	4.82792
1373	CRYZ	161.503	532.486	232.104	725.395
1374	TYW3	319.92	917.703	542.187	823.16
1375	LHX8	1.02868	1.3636	2.75222	0
1376	SLC44A5	0	2.7272	5.50444	1.20698
1377	RP4-595K12.2	2.05736	3.409	0.917406	1.20698
1378	RP4-682C21.5	3.08605	2.7272	1.83481	1.20698
1379	ACADM	832.204	1665.64	1197.21	1701.84
1380	RP4-682C21.2	19.545	19.0904	24.77	36.2094
1381	RABGGTB	1366.09	2144.94	1991.69	2579.32
1382	MSH4	3.08605	3.409	3.66962	4.82792
1383	RP11-550H2.1	0	0	0	0
1384	RP11-550H2.2	0	0.6818	0	0
1385	ST6GALNAC3	268.486	1391.55	1013.73	534.692
1386	RP11-335E14.1	1.02868	1.3636	1.83481	0
1387	RP5-1102E8.3	2.05736	2.0454	1.83481	3.62094
1388	TPI1P1	22.631	12.9542	25.6874	7.24188
1389	ST6GALNAC5	0	2.0454	0.917406	7.24188
1390	RP4-564M11.2	1.02868	0	0	1.20698
1391	PIGK	866.15	1349.28	685.302	1000.59
1392	RP4-706A16.3	27.7744	21.1358	26.6048	19.3117
1393	RP11-363H12.1	1.02868	0	0	2.41396
1394	AK5	7.20077	9.5452	22.9351	26.5536
1395	RP11-375A5.1	0	0	0	1.20698
1396	ZZZ3	1499.82	1737.91	1488.95	1721.15
1397	RNA5SP20	0	0	0	1.20698
1398	RN7SL370P	0	0.6818	0.917406	0
1399	USP33	1407.24	1964.27	1036.67	1398.89
1400	FAM73A	706.704	790.888	531.178	731.43
1401	RP11-181C21.4	1.02868	0	7.33925	6.0349
1402	NSRP1P1	2.05736	1.3636	0.917406	2.41396
1403	HSPE1P25	3.08605	0	0.917406	0
1404	NEXN-AS1	1.02868	2.7272	1.83481	0
1405	NEXN	14.4015	22.4994	19.2655	13.2768
1406	FUBP1	1344.49	1861.31	1140.34	1735.64
1407	DNAJB4	172.819	286.356	68.8054	225.705
1408	GIPC2	1.02868	0	0.917406	0
1409	RP11-386I14.4	40.1186	46.3624	6.42184	14.4838
1410	RP11-386I14.3	1.02868	0.6818	1.83481	0
1411	PTGFR	2.05736	0	0	2.41396
1412	IFI44L	24.6884	1.3636	0	0
1413	IFI44	153.274	6.818	66.0532	148.459
1414	RP4-641G12.3	0	0	0	0
1415	RP4-641G12.4	0	0	0	1.20698
1416	ADGRL4	3.08605	0	0	0
1417	PSAT1P3	0	1.3636	0	1.20698
1418	HNRNPA1P64	0	0	1.83481	0
1419	RPL7P10	1.02868	0	5.50444	0
1420	ADGRL2	831.175	267.266	504.573	762.811
1421	LINC01362	1.02868	0	0	0
1422	LINC01361	0	0	0	0
1423	RP11-413G15.1	0	0	0	0
1424	RP11-475O6.1	1.02868	2.0454	0	3.62094
1425	RP5-836J3.1	1.02868	0	0	0
1426	TTLL7	623.381	521.577	122.932	334.333
1427	TTLL7-IT1	12.3442	2.7272	0.917406	7.24188
1428	RP11-486G15.2	9.25814	17.7268	9.17406	7.24188
1429	PRKACB	656.299	704.3	888.049	2080.83
1430	RP11-486G15.1	3.08605	0	0.917406	1.20698
1431	AL450063.1	0	0	0	1.20698
1432	RP11-82H13.2	1.02868	1.3636	0	1.20698
1433	SNORA2	0	0.6818	0	0
1434	SAMD13	31.8891	25.2266	37.6136	49.4862
1435	RP11-376N17.4	2.05736	0	0	1.20698
1436	UOX	0	2.0454	0.917406	0
1437	DNASE2B	1.02868	2.0454	0	0
1438	RPF1	335.35	848.841	498.151	741.086
1439	GNG5	661.442	565.894	256.874	726.602
1440	SPATA1	10.2868	5.4544	3.66962	4.82792
1441	CTBS	175.905	125.451	174.307	183.461
1442	LINC01555	0	0.6818	0	0
1443	RP11-484D4.3	0	0	0	1.20698
1444	SSX2IP	300.375	816.115	338.523	724.188
1445	LPAR3	294.203	224.994	412.833	381.406
1446	MCOLN2	136.815	289.083	172.472	284.847
1447	WDR63	8.22945	26.5902	18.3481	60.349
1448	MCOLN3	131.671	197.04	293.57	713.325
1449	MIR4423	0	0	0	0
1450	RP11-33E12.2	9.25814	8.1816	23.8526	31.3815
1451	SYDE2	90.524	110.452	211.921	266.743
1452	C1orf52	100.811	269.311	149.537	216.049
1453	Y_RNA	2.05736	2.0454	2.75222	1.20698
1454	BCL10	147.101	332.037	256.874	336.747
1455	RP11-131L23.1	4.11473	1.3636	4.58703	6.0349
1456	DDAH1	281.859	427.489	77.0621	100.179
1457	RP11-131L23.2	0	0	0	0
1458	RP4-621F18.2	1.02868	4.0908	3.66962	6.0349
1459	RP11-290M5.4	1.02868	0	1.83481	0
1460	CYR61	30.8605	33.4082	149.537	248.638
1461	RP11-290M5.2	0	0	0	0
1462	ZNHIT6	372.383	519.532	422.007	529.864
1463	COL24A1	1.02868	0	0.917406	0
1464	ODF2L	154.302	282.265	299.992	520.208
1465	CLCA2	0	0	0.917406	0
1466	CLCA1	0	0	0	1.20698
1467	RP4-612B15.3	0	1.3636	0.917406	6.0349
1468	SH3GLB1	651.156	1075.2	931.167	1663.22
1469	RP4-612B15.2	4.11473	0	0	2.41396
1470	2015-09-01	716.991	1476.1	783.465	1815.3
1471	HS2ST1	721.106	933.385	631.175	1238.36
1472	RP4-604K5.3	4.11473	1.3636	3.66962	3.62094
1473	AL121989.1	0	0	0	1.20698
1474	RP5-1052I5.2	0	0	0	2.41396
1475	RP11-384B12.2	1.02868	2.7272	1.83481	1.20698
1476	RP11-384B12.3	4.11473	1.3636	0	1.20698
1477	LINC01140	0	2.0454	1.83481	3.62094
1478	LMO4	101.839	104.315	466.042	352.438
1479	LINC01364	0	0	0.917406	1.20698
1480	RP11-60A14.1	1.02868	0	0	1.20698
1481	PKN2-AS1	1.02868	0.6818	9.17406	7.24188
1482	PKN2	999.879	1844.95	914.654	1674.08
1483	RNU6-125P	0	0	0.917406	0
1484	TCEB1P19	3.08605	2.0454	1.83481	1.20698
1485	GTF2B	268.486	625.893	237.608	399.51
1486	RP11-82K18.2	2.05736	2.0454	1.83481	1.20698
1487	CCBL2	168.704	347.036	278.891	385.027
1488	RBMXL1	151.216	713.163	360.541	655.39
1489	GBP3	5.14341	72.9526	88.9884	118.284
1490	GBP1	48.348	148.632	6.42184	43.4513
1491	PTGES3P1	36.0039	9.5452	33.944	35.0024
1492	GBP2	40.1186	40.2262	0.917406	13.2768
1493	GBP4	0	7.4998	0	0
1494	GBP5	0	0.6818	0	1.20698
1495	GBP6	1.02868	0	0	0
1496	GBP1P1	0	2.7272	0	0
1497	LRRC8B	250.998	557.713	173.39	242.603
1498	FLJ27354	22.631	19.0904	0.917406	2.41396
1499	RP11-413E1.4	5.14341	2.0454	1.83481	4.82792
1500	LRRC8C	307.576	873.386	252.287	592.627
1501	RP11-413E1.2	0	0.6818	0	3.62094
1502	RP5-943J3.1	0	0.6818	0	0
1503	RP5-943J3.2	2.05736	4.0908	6.42184	3.62094
1504	LRRC8D	567.832	1011.79	988.046	719.36
1505	RP11-302M6.5	6.17209	2.7272	1.83481	1.20698
1506	GEMIN8P4	19.545	14.3178	11.9263	4.82792
1507	ZNF326	594.578	671.573	410.08	990.931
1508	RP5-827O9.1	0	2.0454	0	0
1509	BARHL2	0	0	2.75222	1.20698
1510	RP4-665J23.1	50.4054	109.088	90.8232	73.6258
1511	RP4-665J23.2	0	1.3636	0	0
1512	RP4-665J23.4	0	3.409	0	0
1513	PHKA1P1	1.02868	0.6818	0.917406	1.20698
1514	ZNF644	886.724	2213.12	1366.93	2156.87
1515	RPL5P6	0	0	0.917406	0
1516	HFM1	24.6884	16.3632	14.6785	13.2768
1517	FEN1P1	2.05736	0	0.917406	1.20698
1518	CDC7	299.346	876.113	230.269	506.932
1519	WDR82P2	1.02868	0.6818	0	0
1520	RP11-91I11.1	0	0	0	0
1521	HSP90B3P	5.14341	0.6818	0.917406	0
1522	TGFBR3	302.432	1256.56	211.921	293.296
1523	RN7SL653P	0	0	0	0
1524	EPHX4	10.2868	55.2258	11.0089	9.65584
1525	LPCAT2BP	0	0	0	0
1526	SETSIP	0	4.7726	21.1003	3.62094
1527	BTBD8	21.6023	10.227	12.8437	8.44886
1528	GAPDHP46	0	0	0.917406	0
1529	PRKAR1AP	1.02868	0	0	1.20698
1530	KIAA1107	105.954	57.953	39.4485	39.8303
1531	RP4-621B10.8	2.05736	0	0	0
1532	C1orf146	3.08605	2.0454	0.917406	2.41396
1533	GLMN	104.926	279.538	90.8232	193.117
1534	RPAP2	261.285	687.937	347.697	558.832
1535	GFI1	7.20077	7.4998	6.42184	0
1536	EVI5	561.66	923.158	1095.38	1654.77
1537	RP4-593M8.1	1.02868	1.3636	0.917406	1.20698
1538	HMGB3P9	4.11473	2.7272	1.83481	4.82792
1539	RNU4-59P	0	0	0	4.82792
1540	RP11-330C7.3	2.05736	3.409	0.917406	13.2768
1541	RP11-330C7.4	1.02868	0.6818	0	0
1542	CCNJP2	1.02868	1.3636	1.83481	2.41396
1543	RPL5	6024.99	10533.1	8109.87	7530.35
1544	FAM69A	157.388	263.857	175.225	388.648
1545	SNORA66	2.05736	8.8634	5.50444	10.8628
1546	SNORA51	0	0	0	0
1547	RP11-386I23.1	10.2868	1.3636	4.58703	4.82792
1548	MTF2	441.304	1084.74	394.485	660.218
1549	TMED5	922.728	2050.86	774.291	1919.1
1550	CCDC18	223.224	441.125	142.198	281.226
1551	RP4-612C19.1	1.02868	0.6818	0	0
1552	RP4-612C19.2	1.02868	0.6818	0	0
1553	RP4-717I23.3	116.241	59.3166	76.1447	43.4513
1554	RP4-717I23.2	6.17209	1.3636	7.33925	0
1555	DR1	983.42	1776.77	1454.09	1948.07
1556	RP4-713B5.2	2.05736	1.3636	0	1.20698
1557	FNBP1L	621.324	1818.36	477.968	477.964
1558	RNA5SP53	0	0	0	2.41396
1559	BCAR3	178.991	385.217	322.927	206.394
1560	RP5-1033H22.2	12.3442	3.409	11.0089	8.44886
1561	RP11-488P3.1	1.02868	1.3636	12.8437	3.62094
1562	MIR760	0	0	0.917406	0
1563	RP4-561L24.3	1.02868	2.0454	2.75222	2.41396
1564	DNTTIP2	490.681	1776.77	915.571	1561.83
1565	GCLM	295.232	804.524	515.582	1116.46
1566	ABCA4	7.20077	1.3636	0	0
1567	ARHGAP29	544.173	924.521	51.3747	118.284
1568	RP11-148B18.1	0	2.0454	0	0
1569	RP11-148B18.4	0	0	0	0
1570	ABCD3	562.689	1402.46	505.491	988.517
1571	F3	11.3155	78.407	26.6048	62.763
1572	RP11-86H7.6	0	1.3636	0	0
1573	LINC01057	48.348	131.587	11.0089	9.65584
1574	KATNBL1P2	1.02868	0	0	0
1575	AC093117.1	2.05736	0	0	0
1576	MIR378G	1.02868	0.6818	0	0
1577	SLC44A3	58.6349	90.6794	18.3481	24.1396
1578	CNN3	2137.6	4281.71	963.276	2273.95
1579	RP4-639F20.1	27.7744	24.5448	11.0089	7.24188
1580	ALG14	127.557	284.993	71.5577	143.631
1581	RP11-313A24.1	1.02868	1.3636	0	2.41396
1582	TMEM56	308.605	529.077	317.422	470.722
1583	TMEM56-RWDD3	6.17209	3.409	3.66962	7.24188
1584	RP11-57H12.2	3.08605	2.0454	0.917406	2.41396
1585	Y_RNA	1.02868	0	0	0
1586	RP11-57H12.3	2.05736	2.0454	4.58703	2.41396
1587	RWDD3	20.5736	34.7718	27.5222	22.9326
1588	RP11-57H12.5	7.20077	4.7726	7.33925	7.24188
1589	EEF1A1P11	81.2659	34.09	74.3099	41.0373
1590	RPL7P9	36.0039	56.5894	36.6962	51.9001
1591	PTBP2	343.58	683.164	219.26	418.822
1592	DPYD	0	6.818	315.588	700.048
1593	DPYD-AS1	0	0	2.75222	9.65584
1594	DPYD-IT1	0	0	1.83481	2.41396
1595	SEC63P1	1.02868	0.6818	9.17406	12.0698
1596	RPL26P9	0	0	0.917406	2.41396
1597	RP11-272L13.2	0	0	0	3.62094
1598	DPYD-AS2	0	0	3.66962	6.0349
1599	RP11-272L13.4	0	0	0	4.82792
1600	RP11-272L13.3	0	0	0	0
1601	RP11-490G2.2	0	0	0	1.20698
1602	MIR137HG	0	0	19.2655	42.2443
1603	RP5-1070A16.1	0	0.6818	0.917406	3.62094
1604	RP11-296E3.2	0	0	0	3.62094
1605	SNX7	162.532	237.267	286.231	652.976
1606	PLPPR5	0	0	2.75222	2.41396
1607	RP11-234N17.1	2.05736	3.409	1.83481	2.41396
1608	PLPPR4	0	0.6818	0	0
1609	PALMD	0	0	1.83481	1.20698
1610	FRRS1	112.126	76.3616	199.077	197.945
1611	AGL	591.492	438.398	669.706	1042.83
1612	RP5-884G6.2	2.05736	3.409	5.50444	0
1613	SLC35A3	392.956	743.844	380.723	696.427
1614	RNU6-750P	1.02868	0	0.917406	2.41396
1615	RNU6-1318P	0	0	0	0
1616	RP4-714D9.5	20.5736	25.2266	11.9263	44.6583
1617	HIAT1	545.201	1124.97	682.55	966.791
1618	RP4-714D9.2	0	0.6818	1.83481	1.20698
1619	SASS6	343.58	576.803	233.939	561.246
1620	RP4-714D9.4	3.08605	2.7272	0	8.44886
1621	TRMT13	149.159	299.31	208.251	295.71
1622	LRRC39	62.7496	13.636	2.75222	3.62094
1623	DBT	489.653	609.529	426.594	482.792
1624	RPL23AP90	0	0	0	0
1625	BRI3P1	0	0	0	0
1626	RP11-305E17.4	2.05736	0.6818	0.917406	0
1627	RTCA-AS1	3.08605	3.409	1.83481	0
1628	RTCA	368.268	822.251	571.544	589.006
1629	MIR553	4.11473	1.3636	0	1.20698
1630	RP5-837M10.1	0	0	0.917406	0
1631	CDC14A	44.2333	88.634	65.1358	119.491
1632	BCAS2P2	2.05736	0.6818	0	2.41396
1633	RP5-837M10.4	0	0	0	1.20698
1634	VCAM1	0	0.6818	0.917406	0
1635	EXTL2	270.543	547.486	256.874	498.483
1636	SLC30A7	832.204	1709.96	1070.61	1839.44
1637	HNRNPA1P68	5.14341	2.0454	3.66962	12.0698
1638	DPH5	392.956	426.807	414.667	308.987
1639	RP11-421L21.2	5.14341	5.4544	2.75222	13.2768
1640	RP11-421L21.3	54.5201	66.1346	59.6314	19.3117
1641	S1PR1	2.05736	0	0	2.41396
1642	RP4-575N6.2	0	0	15.5959	1.20698
1643	RP11-411H5.1	0	0.6818	0	0
1644	RPSAP19	4.11473	11.5906	28.4396	7.24188
1645	OLFM3	31.8891	6.1362	0	0
1646	RP11-202K23.1	0	0	0	0
1647	COL11A1	2.05736	0.6818	0	3.62094
1648	SOD2P1	0	0	0	0
1649	RP11-153F1.2	0	0	1.83481	10.8628
1650	RP11-153F1.1	0	0	0	2.41396
1651	RN7SKP285	0	0.6818	1.83481	0
1652	RNPC3	92.5814	143.178	133.941	203.98
1653	AMY2B	5.14341	8.8634	5.50444	6.0349
1654	RP11-97C18.1	1.02868	0	0	0
1655	FTLP17	0	0	0.917406	0
1656	SEPT2P1	0	0.6818	0	0
1657	RP11-90H3.2	1.02868	0	0	0
1658	RP11-90H3.1	3.08605	0.6818	0.917406	4.82792
1659	PRMT6	131.671	206.585	160.546	264.329
1660	NTNG1	0	0	91.7406	117.077
1661	RP11-270C12.3	2.05736	2.0454	4.58703	6.0349
1662	VAV3	105.954	36.8172	59.6314	95.3514
1663	RP11-356N1.2	0	0	0	1.20698
1664	SLC25A24	449.534	1202.01	733.925	1432.69
1665	RP11-483I13.6	0	0	0.917406	3.62094
1666	NBPF4	0	0	6.42184	1.20698
1667	SLC25A24P1	1.02868	0.6818	22.0177	59.142
1668	NBPF6	0	0	0	0
1669	NBPF5P	0	0	0.917406	1.20698
1670	SLC25A24P2	0	0	5.50444	2.41396
1671	FAM102B	603.836	1711.32	353.201	750.742
1672	HENMT1	0	5.4544	56.8792	91.7305
1673	PRPF38B	290.088	839.296	659.615	657.804
1674	FNDC7	0	0	0	0
1675	STXBP3	455.706	859.068	353.201	601.076
1676	RP11-475E11.2	7.20077	0.6818	0.917406	2.41396
1677	AKNAD1	2.05736	4.7726	3.66962	6.0349
1678	SPATA42	0	0	0	1.20698
1679	GPSM2	416.616	707.709	512.83	924.547
1680	CLCC1	213.966	502.487	466.042	429.685
1681	WDR47	140.929	372.945	256.874	561.246
1682	RP5-1065J22.2	0	0	0	0
1683	RP11-20O24.4	11.3155	23.1812	19.2655	8.44886
1684	RP11-20O24.1	1.02868	0	0	1.20698
1685	RANP5	0	0	0.917406	0
1686	TAF13	152.245	441.807	258.708	514.173
1687	RP5-1065J22.8	0	1.3636	2.75222	3.62094
1688	TMEM167B	210.88	495.669	456.868	418.822
1689	RP5-1065J22.4	2.05736	6.818	11.0089	8.44886
1690	C1orf194	3.08605	0	5.50444	10.8628
1691	KIAA1324	1.02868	1.3636	3.66962	2.41396
1692	SARS	1428.84	2194.03	5351.23	1087.49
1693	CELSR2	354.895	274.084	252.287	80.8677
1694	PSRC1	258.199	621.802	179.812	152.079
1695	MYBPHL	0	0.6818	1.83481	0
1696	SORT1	4184.68	5215.09	3743.93	4581.7
1697	PSMA5	674.815	1891.31	781.63	1165.94
1698	SYPL2	0	2.0454	13.7611	8.44886
1699	ATXN7L2	17.4876	31.3628	19.2655	6.0349
1700	CYB561D1	72.0077	74.998	115.593	103.8
1701	AMIGO1	11.3155	32.7264	10.0915	13.2768
1702	GPR61	1.02868	6.1362	2.75222	4.82792
1703	GNAI3	1000.91	2900.38	1320.15	2166.53
1704	RNU6V	1.02868	2.7272	0	3.62094
1705	AMPD2	155.331	155.45	310.083	96.5584
1706	RPL7P8	0	0.6818	2.75222	1.20698
1707	GSTM4	205.736	341.582	270.635	164.149
1708	GSTM2	57.6062	38.8626	5.50444	7.24188
1709	GSTM1	1.02868	0	0	1.20698
1710	GSTM5	0	0	0	0
1711	RP4-735C1.4	0	0.6818	0	0
1712	GSTM3	93.61	222.267	15.5959	18.1047
1713	NDUFA5P10	0	0	0	0
1714	RP11-195M16.3	1.02868	0	0	0
1715	CSF1	63.7783	100.225	98.1624	56.7281
1716	AHCYL1	1410.32	1527.91	4232.91	2526.21
1717	STRIP1	348.723	529.759	346.779	165.356
1718	RP4-773N10.4	82.2945	91.3612	69.7228	54.3141
1719	ALX3	0	0	0	0
1720	LINC01397	0	2.0454	0	0
1721	UBL4B	2.05736	0	0	0
1722	SLC6A17	335.35	289.083	191.738	30.1745
1723	RP5-1028L10.1	0	0.6818	0.917406	0
1724	RP5-1028L10.2	4.11473	5.4544	9.17406	9.65584
1725	KCNC4-AS1	0	0	0	0
1726	KCNC4	125.499	35.4536	52.2921	77.2467
1727	RP5-1003J2.4	0	0	0	0
1728	RP5-1074L1.1	3.08605	2.0454	4.58703	6.0349
1729	RBM15	528.742	761.571	555.031	444.169
1730	LAMTOR5-AS1	42.176	44.9988	46.7877	63.9699
1731	SLC16A4	202.65	139.087	174.307	179.84
1732	RP5-1074L1.4	21.6023	22.4994	27.5222	98.9724
1733	LAMTOR5	513.312	774.525	422.007	627.63
1734	CYMP	0	0	0	0
1735	RP11-470L19.2	0	0	0	0
1736	KCNA2	101.839	42.9534	0.917406	0
1737	NRBF2P3	1.02868	0.6818	0.917406	0
1738	CD53	2.05736	0.6818	0	1.20698
1739	RP11-96K19.4	19.545	10.227	9.17406	20.5187
1740	RP11-96K19.2	12.3442	10.227	14.6785	8.44886
1741	LRIF1	323.006	567.94	320.175	323.471
1742	RP11-96K19.5	3.08605	1.3636	4.58703	1.20698
1743	DRAM2	382.67	429.534	349.532	380.199
1744	CEPT1	341.522	610.893	289.9	435.72
1745	DENND2D	701.561	865.886	3.66962	13.2768
1746	CHI3L2	14.4015	15.6814	0	0
1747	CHIAP1	6.17209	4.7726	0	0
1748	CHIAP2	0	0	0.917406	0
1749	PIFO	1.02868	6.1362	0	0
1750	CHIAP3	0	0	0	0
1751	PGCP1	0	1.3636	0	0
1752	OVGP1	1.02868	1.3636	3.66962	9.65584
1753	RP11-552M11.8	3.08605	7.4998	11.0089	8.44886
1754	UBE2FP3	3.08605	5.4544	7.33925	15.6907
1755	RP11-552M11.4	3.08605	8.1816	2.75222	12.0698
1756	WDR77	284.945	605.439	255.956	321.057
1757	Y_RNA	2.05736	2.7272	0	1.20698
1758	ATP5F1	2357.74	4523.75	2254.98	3149.01
1759	C1orf162	1.02868	1.3636	5.50444	2.41396
1760	TMIGD3	0	2.0454	0	2.41396
1761	RAP1A	438.218	335.446	183.481	477.964
1762	LINC01160	0	0.6818	0	0
1763	KRT18P57	7.20077	0.6818	1.83481	2.41396
1764	RNU6-151P	3.08605	0.6818	0	1.20698
1765	FAM212B	42.176	81.1342	19.2655	20.5187
1766	FAM212B-AS1	0	0	0	1.20698
1767	DDX20	336.379	1193.15	384.393	727.809
1768	KCND3	1.02868	6.1362	9.17406	15.6907
1769	KCND3-AS1	0	0	0	0
1770	RP11-88H9.2	0	0	0	0
1771	CTTNBP2NL	209.851	319.083	289.9	491.241
1772	WNT2B	22.631	15.6814	22.9351	13.2768
1773	RP4-671G15.2	1.02868	0.6818	0	1.20698
1774	ST7L	135.786	266.584	153.207	195.531
1775	CAPZA1	1809.45	4678.51	2027.47	3289.02
1776	MRPL53P1	0	1.3636	5.50444	7.24188
1777	RNU7-70P	1.02868	0.6818	0	4.82792
1778	MOV10	329.178	329.991	422.924	146.045
1779	RP11-426L16.3	0	4.7726	4.58703	0
1780	RHOC	309.633	524.986	383.476	131.561
1781	RP11-426L16.10	0	0	0	0
1782	PPM1J	4.11473	1.3636	8.25665	2.41396
1783	RP11-426L16.9	0	0	0	1.20698
1784	FAM19A3	1.02868	9.5452	0	3.62094
1785	LINC01356	5.14341	11.5906	3.66962	0
1786	RP3-522D1.1	4.11473	7.4998	0	0
1787	SLC16A1	1408.27	5122.37	2083.43	2681.91
1788	AKR7A2P1	6.17209	4.7726	0	1.20698
1789	SLC16A1-AS1	113.155	83.1796	151.372	129.147
1790	RP11-31F15.2	12.3442	11.5906	11.9263	7.24188
1791	LRIG2	267.457	452.034	267.883	385.027
1792	Metazoa_SRP	1.02868	1.3636	0	3.62094
1793	RP11-389O22.4	0	0	0.917406	0
1794	MAGI3	226.31	297.265	220.177	498.483
1795	RP11-512F24.1	3.08605	0.6818	0.917406	1.20698
1796	MTND5P20	0	0	0	0
1797	PHTF1	141.958	438.398	283.478	494.862
1798	RP4-730K3.3	1.02868	2.0454	3.66962	7.24188
1799	RSBN1	241.74	392.717	326.597	529.864
1800	RP5-1073O3.2	2.05736	0.6818	0	0
1801	PTPN22	0	1.3636	0	0
1802	AP4B1-AS1	3.08605	4.0908	4.58703	1.20698
1803	BCL2L15	0	2.0454	5.50444	6.0349
1804	AP4B1	85.3806	195.677	103.667	123.112
1805	DCLRE1B	129.614	358.627	195.407	275.191
1806	HIPK1-AS1	1.02868	4.7726	7.33925	8.44886
1807	HIPK1	895.982	1152.24	1078.87	1682.53
1808	OLFML3	13.3729	127.497	3.66962	10.8628
1809	SYT6	3.08605	6.1362	0	1.20698
1810	TRIM33	1923.63	3447.86	1513.72	2334.3
1811	RP4-591B8.2	2.05736	3.409	0.917406	8.44886
1812	EIF2S2P5	2.05736	2.7272	0	2.41396
1813	Y_RNA	0	0.6818	0	3.62094
1814	PKMP1	2.05736	0.6818	3.66962	1.20698
1815	BCAS2	320.949	963.384	425.676	625.216
1816	DENND2C	13.3729	50.4532	28.4396	48.2792
1817	AMPD1	1.02868	3.409	0	0
1818	NRAS	1493.65	4651.24	1176.11	2389.82
1819	CSDE1	6074.37	13148.5	6757.61	8332.99
1820	RNY1P13	2.05736	2.7272	1.83481	1.20698
1821	SIKE1	458.792	1008.38	563.287	820.746
1822	SYCP1	0	0	0	1.20698
1823	TSPAN2	0	0	0.917406	3.62094
1824	VANGL1	970.047	2357.67	1083.46	1874.44
1825	CASQ2	36.0039	75.6798	1.83481	0
1826	NHLH2	8.22945	9.5452	0	0
1827	HNRNPA1P43	0	1.3636	3.66962	1.20698
1828	RP11-12L8.1	1.02868	1.3636	0.917406	0
1829	SLC22A15	242.769	176.586	611.91	251.052
1830	RP11-159M11.2	4.11473	1.3636	4.58703	6.0349
1831	MAB21L3	3.08605	3.409	4.58703	0
1832	ATP1A1	12109.6	9446.34	15950	10788
1833	ATP1A1-AS1	39.0899	43.6352	46.7877	31.3815
1834	RNU6-817P	3.08605	0.6818	2.75222	7.24188
1835	RP4-655J12.4	57.6062	12.9542	27.5222	38.6234
1836	RP4-655J12.5	4.11473	2.7272	4.58703	2.41396
1837	Y_RNA	4.11473	0.6818	0	0
1838	RP5-1086K13.1	168.704	85.225	240.36	109.835
1839	CD58	88.4666	182.722	142.198	312.608
1840	NAP1L4P1	14.4015	12.2724	27.5222	41.0373
1841	MIR548AC	0	0	0.917406	0
1842	IGSF3	1198.41	1992.22	2034.81	2094.11
1843	AL355794.1	2.05736	0	0	0
1844	C1orf137	1.02868	0	0	0
1845	GAPDHP64	2.05736	0	0	0
1846	RP4-753F5.1	2.05736	0.6818	0	0
1847	PTGFRN	1348.6	2076.76	1326.57	970.412
1848	CD101	10.2868	12.2724	3.66962	7.24188
1849	RP11-27K13.3	3.08605	3.409	0.917406	1.20698
1850	TTF2	1357.86	1921.31	1056.85	1579.94
1851	MIR942	1.02868	1.3636	1.83481	1.20698
1852	TRIM45	70.979	53.1804	131.189	63.9699
1853	VTCN1	0	0.6818	4.58703	0
1854	RP11-188D8.1	1.02868	0.6818	3.66962	0
1855	MAN1A2	593.549	1137.92	1412.81	2019.28
1856	RP4-675C20.4	1.02868	0.6818	0.917406	4.82792
1857	VPS25P1	1.02868	0	0	0
1858	AL157902.3	0	0.6818	0	0
1859	FAM46C	28.8031	48.4078	1.83481	15.6907
1860	VDAC2P3	1.02868	0	0	2.41396
1861	PNRC2P1	1.02868	2.0454	1.83481	0
1862	GDAP2	532.857	685.891	1066.03	1392.85
1863	WDR3	1046.17	2995.15	1553.17	2108.59
1864	SPAG17	1.02868	6.1362	3.66962	4.82792
1865	PSMC1P12	0	0.6818	2.75222	1.20698
1866	TBX15	0	0.6818	0.917406	4.82792
1867	RP4-712E4.1	0	0.6818	0	0
1868	WARS2	190.306	320.446	194.49	222.084
1869	WARS2-IT1	2.05736	0.6818	0	8.44886
1870	RBMX2P3	1.02868	0	2.75222	1.20698
1871	RPS3AP12	1.02868	0	0	2.41396
1872	RP11-418J17.1	88.4666	70.2254	119.263	111.042
1873	RPL6P2	1.02868	0	0.917406	2.41396
1874	RP11-418J17.3	1.02868	0.6818	0.917406	0
1875	RP5-834N19.1	5.14341	2.7272	0	0
1876	HAO2	0	1.3636	0	1.20698
1877	HSD3B2	0	1.3636	0	0
1878	GAPDHP74	0	0	0	0
1879	HSD3BP2	0	0	0	0
1880	GAPDHP23	0	0.6818	0	1.20698
1881	HSD3BP1	1.02868	0	0	2.41396
1882	GAPDHP58	1.02868	0	0	0
1883	HSD3B1	2.05736	0	0	2.41396
1884	GAPDHP32	2.05736	2.0454	2.75222	3.62094
1885	HSD3BP3	1.02868	1.3636	5.50444	1.20698
1886	GAPDHP27	5.14341	0.6818	4.58703	6.0349
1887	HSD3BP4	19.545	6.818	14.6785	22.9326
1888	GAPDHP33	19.545	6.818	27.5222	30.1745
1889	LINC00622	77.1511	74.998	170.637	229.326
1890	HSD3BP5	138.872	106.361	366.962	292.089
1891	ZNF697	1307.45	2528.12	1879.76	1908.24
1892	PHGDH	796.2	548.167	0.917406	3.62094
1893	HMGCS2	2.05736	0	0	2.41396
1894	ADAM30	0	0	0	0
1895	RP5-1042I8.7	10.2868	15.6814	20.1829	27.7605
1896	NOTCH2	4217.6	7540.71	2505.44	2965.55
1897	SEC22B	399.129	1184.29	550.444	683.151
1898	CH17-472G23.1	0	0	7.33925	0
1899	CH17-472G23.2	5.14341	4.7726	10.0915	3.62094
1900	U1	0	6.1362	0	0
1901	PFN1P2	8.22945	9.5452	11.0089	18.1047
1902	NBPF8	134.757	377.717	288.983	154.493
1903	CH17-472G23.4	132.7	88.634	30.2744	24.1396
1904	U2	1.02868	0.6818	0	0
1905	AC253572.1	34.9752	38.8626	15.5959	12.0698
1906	NBPF26	75.0938	151.36	54.1269	49.4862
1907	RNVU1-19	99.7821	212.04	30.2744	30.1745
1908	AC241377.2	0	0	0	0
1909	LINC00623	1.02868	5.4544	10.0915	2.41396
1910	RNVU1-4	54.5201	102.952	0	0
1911	CH17-118O6.3	0	0	0.917406	0
1912	FCGR1B	0	0	0.917406	0
1913	RP11-439A17.10	0	0	9.17406	8.44886
1914	RP11-439A17.9	0	0	0	1.20698
1915	HIST2H2BA	1.02868	0.6818	10.0915	3.62094
1916	RP11-439A17.4	0	0	0.917406	0
1917	FAM72B	63.7783	79.0888	57.7966	97.7654
1918	SRGAP2C	225.281	484.078	509.16	434.513
1919	CH17-219N22.1	0	0.6818	1.83481	0
1920	SRGAP2-AS1	1.02868	4.0908	6.42184	9.65584
1921	CH17-437K3.1	0	13.636	1.83481	21.7256
1922	AC244021.1	0	0	0	0
1923	RP11-343N15.2	0	2.0454	1.83481	1.20698
1924	RP11-344P13.4	0	0	3.66962	0
1925	RP11-344P13.3	3.08605	2.0454	2.75222	2.41396
1926	RP11-344P13.6	0	0	1.83481	3.62094
1927	EMBP1	0	6.818	21.1003	31.3815
1928	RP11-344P13.1	0	0	0.917406	0
1929	CH17-13I23.3	5.14341	3.409	2.75222	2.41396
1930	NBPF17P	18.5163	12.9542	0	0
1931	RNVU1-17	5.14341	0.6818	0	0
1932	RNU1-92P	6.17209	7.4998	0	0
1933	AC239800.1	0	0.6818	0	0
1934	RNVU1-18	20.5736	38.8626	5.50444	7.24188
1935	RP11-403I13.5	1.02868	1.3636	0	0
1936	RP11-403I13.4	0	0	0	0
1937	FAM91A3P	2.05736	0	0	0
1938	HIST2H2BB	0	0	2.75222	0
1939	RP5-998N21.4	0	0	0	0
1940	RP5-998N21.7	0	0	0.917406	0
1941	FAM72C	37.0325	20.454	23.8526	54.3141
1942	SRGAP2D	45.262	85.9068	41.2833	27.7605
1943	RP11-14N7.2	3.08605	7.4998	2.75222	0
1944	RNVU1-15	158.417	165.677	42.2007	53.1071
1945	NBPF15	437.19	505.214	349.532	315.022
1946	PFN1P6	7.20077	1.3636	7.33925	1.20698
1947	U1	37.0325	87.9522	17.4307	10.8628
1948	U1	19.545	27.272	2.75222	3.62094
1949	AC253578.1	1.02868	4.0908	0	0
1950	U1	7.20077	0.6818	104.584	113.456
1951	CH17-125A10.2	0	0	0	0
1952	RP11-289H16.1	0	1.3636	0	2.41396
1953	SRGAP2B	104.926	193.631	174.307	65.1769
1954	RP3-365I19.2	1.02868	0.6818	0	0
1955	FAM72D	33.9465	29.9992	17.4307	41.0373
1956	RP11-403I13.8	17.4876	6.1362	34.8614	9.65584
1957	U1	0	0	0.917406	0
1958	RP11-289I10.2	1.02868	0.6818	0	0
1959	CH17-373J23.1	73.0364	76.3616	46.7877	28.9675
1960	RP11-89F3.2	1.02868	0	0	0
1961	NBPF20	81.2659	102.27	43.1181	54.3141
1962	PFN1P3	3.08605	4.0908	2.75222	0
1963	U1	306.547	402.262	121.098	232.947
1964	CH17-262O2.1	2.05736	0.6818	0	0
1965	NBPF25P	10.2868	13.636	13.7611	25.3466
1966	GPR89A	75.0938	126.815	47.7051	56.7281
1967	PDZK1	4.11473	5.4544	2.75222	6.0349
1968	CD160	8.22945	14.9996	14.6785	18.1047
1969	RNF115	553.431	745.208	567.874	689.186
1970	POLR3C	371.354	561.122	613.745	461.066
1971	NUDT17	43.2046	16.3632	33.0266	8.44886
1972	PIAS3	181.048	164.996	78.8969	114.663
1973	ITGA10	81.2659	124.088	44.0355	41.0373
1974	RP11-315I20.3	0	0	0	0
1975	PEX11B	152.245	191.586	146.785	105.007
1976	RBM8A	560.632	932.703	552.278	469.515
1977	GNRHR2	4.11473	0.6818	11.0089	9.65584
1978	RP11-315I20.1	3.08605	2.7272	1.83481	3.62094
1979	LIX1L	564.746	646.347	513.747	692.807
1980	ANKRD34A	22.631	12.2724	7.33925	2.41396
1981	POLR3GL	59.6635	100.906	77.9795	60.349
1982	TXNIP	33.9465	1034.97	2236.64	440.548
1983	HFE2	1.02868	0	0.917406	1.20698
1984	RNVU1-6	122.413	104.315	39.4485	68.7979
1985	RP11-458D21.1	10.2868	2.7272	22.0177	13.2768
1986	NBPF10	19.545	34.09	39.4485	31.3815
1987	RP11-458D21.5	0	0	0	0
1988	NOTCH2NL	30.8605	19.7722	24.77	20.5187
1989	CH17-353B19.1	0	0	0	0
1990	CH17-385C13.2	0	0.6818	0	0
1991	AC243756.1	0	0	0	1.20698
1992	U1	48.348	65.4528	11.0089	8.44886
1993	AC245407.1	43.2046	35.4536	10.0915	6.0349
1994	U1	51.4341	96.1338	11.9263	14.4838
1995	CH17-408M7.1	1.02868	1.3636	0	0
1996	HYDIN2	99.7821	45.6806	0	1.20698
1997	NBPF12	129.614	130.906	130.272	115.87
1998	PFN1P8	1.02868	0	0.917406	0
1999	RP4-704D21.2	0	0	0	0
[truncated: 34,501 more rows]
