# Supplementary material for: Loss of Gene Information: Discrepancies between RNA Sequencing, cDNA Microarray, and qRT-PCR
Source: Int J Mol Sci. 2021 Aug 28;22(17):9349. doi: 10.3390/ijms22179349 (PMC8430810; doi:10.3390/ijms22179349)
Supplement: Supplementary file 1 [file ijms-22-09349-s001.zip › Supplementary_Table_S3.xlsx]

## Sheet: Intersect_MelImJuso_RNA_0
Probe Set ID	MaMelIm	Gene Accession	gene_name	gene_id	GeneSymbol	mean_MelIm	Log2_MelIm	cuttoff_RNA_MelIm	cuttoff_MA_MelIm	highlight
16947034	2.61744	ENST00000471766	AADACP1	ENSG00000240602	AADACP1	0	0	FALSE	FALSE	normal
16904793	5.04866	NM_003742	ABCB11	ENSG00000073734	ABCB11	0	0	FALSE	TRUE	normal
16835556	6.94269	NM_001135186	ABI3	ENSG00000108798	ABI3	0	0	FALSE	TRUE	normal
16848366	3.42704	OTTHUMT00000255323	AC002539.1	ENSG00000230258	AC002539.1	0	0	FALSE	TRUE	normal
17062199	5.75676	OTTHUMT00000316690	AC003084.2	ENSG00000234826	AC003084.2	0	0	FALSE	TRUE	normal
17055649	2.99864	OTTHUMT00000326541	AC004543.2	ENSG00000237921	AC004543.2	0	0	FALSE	FALSE	normal
16886802	5.62936	OTTHUMT00000333268	AC005042.5	ENSG00000228586	AC005042.5	0	0	FALSE	TRUE	normal
17055334	5.48233	OTTHUMT00000326038	AC005281.2	ENSG00000225606	AC005281.2	0	0	FALSE	TRUE	normal
17054129	5.69632	OTTHUMT00000327103	AC005481.5	ENSG00000222012	AC005481.5	0	0	FALSE	TRUE	normal
16914948	4.32613	OTTHUMT00000079761	AC005808.3	ENSG00000235415	AC005808.3	0	0	FALSE	TRUE	normal
16879199	2.4399	OTTHUMT00000326759	AC006369.3	ENSG00000236572	AC006369.3	0	0	FALSE	FALSE	normal
16974446	3.75883	OTTHUMT00000360341	AC007126.1	ENSG00000250497	AC007126.1	0	0	FALSE	TRUE	normal
16890049	4.70149	OTTHUMT00000336791	AC007879.1	ENSG00000224342	AC007879.1	0	0	FALSE	TRUE	normal
16890055	3.83715	OTTHUMT00000336775	AC007879.4	ENSG00000225916	AC007879.4	0	0	FALSE	TRUE	normal
16887007	3.35466	OTTHUMT00000332726	AC008063.3	ENSG00000233397	AC008063.3	0	0	FALSE	TRUE	normal
16895200	4.55368	OTTHUMT00000324295	AC008073.7	ENSG00000232642	AC008073.7	0	0	FALSE	TRUE	normal
16877717	4.38971	OTTHUMT00000324299	AC009228.1	ENSG00000242628	AC009228.1	0	0	FALSE	TRUE	normal
16895054	4.42705	OTTHUMT00000324014	AC009411.2	ENSG00000235537	AC009411.2	0	0	FALSE	TRUE	normal
16889998	3.26303	OTTHUMT00000336805	AC010731.3	ENSG00000231653	AC010731.3	0	0	FALSE	TRUE	normal
16890608	5.00297	OTTHUMT00000337344	AC012513.6	ENSG00000231092	AC012513.6	0	0	FALSE	TRUE	normal
16908106	3.02561	OTTHUMT00000337321	AC012668.1	ENSG00000234938	AC012668.1	0	0	FALSE	TRUE	normal
16908112	3.52872	OTTHUMT00000337310	AC012668.3	ENSG00000227981	AC012668.3	0	0	FALSE	TRUE	normal
16905425	3.41807	OTTHUMT00000334066	AC017048.1	ENSG00000229434	AC017048.1	0	0	FALSE	TRUE	normal
17057703	4.16183	OTTHUMT00000342116	AC020743.2	ENSG00000228005	AC020743.2	0	0	FALSE	TRUE	normal
16880894	4.10886	OTTHUMT00000328343	AC023115.4	ENSG00000236605	AC023115.4	0	0	FALSE	TRUE	normal
16963564	5.76135	OTTHUMT00000340266	AC024560.2	ENSG00000236833	AC024560.2	0	0	FALSE	TRUE	normal
16832629	4.58148	OTTHUMT00000256290	AC024619.2	ENSG00000238007	AC024619.2	0	0	FALSE	TRUE	normal
17122668	2.42083	OTTHUMT00000331368	AC024704.2	ENSG00000244063	AC024704.2	0	0	FALSE	FALSE	normal
16838382	5.22742	OTTHUMT00000255896	AC061992.2	ENSG00000267737	AC061992.2	0	0	FALSE	TRUE	normal
16734330	7.57776	OTTHUMT00000105340	AC068580.5	ENSG00000229512	AC068580.5	0	0	FALSE	TRUE	normal
16896337	4.86228	OTTHUMT00000325414	AC073218.3	ENSG00000232153	AC073218.3	0	0	FALSE	TRUE	normal
16890672	5.0375	OTTHUMT00000339548	AC073321.4	ENSG00000225794	AC073321.4	0	0	FALSE	TRUE	normal
16902387	3.44169	OTTHUMT00000331148	AC073409.1	ENSG00000226708	AC073409.1	0	0	FALSE	TRUE	normal
16905472	5.84786	OTTHUMT00000333896	AC079305.8	ENSG00000229337	AC079305.8	0	0	FALSE	TRUE	normal
16833780	5.95492	OTTHUMT00000255987	AC087491.2	ENSG00000214546	AC087491.2	0	0	FALSE	TRUE	normal
16798525	5.69839	OTTHUMT00000250916	AC090696.2	ENSG00000232394	AC090696.2	0	0	FALSE	TRUE	normal
16900858	5.59047	OTTHUMT00000329534	AC092675.3	ENSG00000222000	AC092675.3	0	0	FALSE	TRUE	normal
16876487	4.7474	OTTHUMT00000322385	AC093326.3	ENSG00000233633	AC093326.3	0	0	FALSE	TRUE	normal
16910309	6.21026	OTTHUMT00000324084	AC093585.6	ENSG00000229996	AC093585.6	0	0	FALSE	TRUE	normal
17042677	2.88031	OTTHUMT00000322479	AC093627.11	ENSG00000239715	AC093627.11	0	0	FALSE	FALSE	normal
17054211	6.44459	OTTHUMT00000322480	AC093627.7	ENSG00000232325	AC093627.7	0	0	FALSE	TRUE	normal
16877292	3.54842	OTTHUMT00000323586	AC096559.2	ENSG00000223360	AC096559.2	0	0	FALSE	TRUE	normal
16887906	5.88917	OTTHUMT00000334492	AC096649.2	ENSG00000229750	AC096649.2	0	0	FALSE	TRUE	normal
16883957	3.42107	OTTHUMT00000329746	AC096669.1	ENSG00000225588	AC096669.1	0	0	FALSE	TRUE	normal
16908480	4.42636	OTTHUMT00000336517	AC097468.7	ENSG00000235024	AC097468.7	0	0	FALSE	TRUE	normal
17064764	4.11816	OTTHUMT00000322236	AC099552.4	ENSG00000217825	AC099552.4	0	0	FALSE	TRUE	normal
16903516	2.61044	OTTHUMT00000332336	AC104777.1	ENSG00000232359	AC104777.1	0	0	FALSE	FALSE	normal
16886472	3.53313	OTTHUMT00000332350	AC104777.3	ENSG00000237220	AC104777.3	0	0	FALSE	TRUE	normal
16878657	2.35013	OTTHUMT00000324767	AC106870.2	ENSG00000197644	AC106870.2	0	0	FALSE	FALSE	normal
16910526	5.39694	OTTHUMT00000322791	AC114730.5	ENSG00000215023	AC114730.5	0	0	FALSE	TRUE	normal
16876517	6.02658	OTTHUMT00000322426	AC116609.2	ENSG00000223751	AC116609.2	0	0	FALSE	TRUE	normal
16876514	6.42378	OTTHUMT00000322420	AC116609.3	ENSG00000231173	AC116609.3	0	0	FALSE	TRUE	normal
16950069	4.91663	OTTHUMT00000340292	AC128709.2	ENSG00000237167	AC128709.2	0	0	FALSE	TRUE	normal
16938398	3.25027	OTTHUMT00000341068	AC133680.1	ENSG00000237838	AC133680.1	0	0	FALSE	TRUE	normal
17121716	5.54609	OTTHUMT00000438908	AC144831.1	ENSG00000261888	AC144831.1	0	0	FALSE	TRUE	normal
17054239	5.01168	OTTHUMT00000322539	AC147651.1	ENSG00000234471	AC147651.1	0	0	FALSE	TRUE	normal
16824639	3.94865	ENST00000329697	ACSM2B	ENSG00000066813	ACSM2B	0	0	FALSE	TRUE	normal
16707773	4.02041	NM_207321	ACSM6	ENSG00000173124	ACSM6	0	0	FALSE	TRUE	normal
17096855	5.7428	ENST00000374667	ACTL7B	ENSG00000148156	ACTL7B	0	0	FALSE	TRUE	normal
17076538	3.35403	NM_001278113	ADAM2	ENSG00000104755	ADAM2	0	0	FALSE	TRUE	normal
16972516	3.53886	NM_001278125	ADAM29	ENSG00000168594	ADAM29	0	0	FALSE	TRUE	normal
16691662	4.2071	NM_021794	ADAM30	ENSG00000134249	ADAM30	0	0	FALSE	TRUE	normal
16916763	6.15358	NM_001282447	ADAM33	ENSG00000149451	ADAM33	0	0	FALSE	TRUE	normal
16828550	5.12106	NM_199355	ADAMTS18	ENSG00000140873	ADAMTS18	0	0	FALSE	TRUE	normal
16924620	5.29363	NM_007038	ADAMTS5	ENSG00000154736	ADAMTS5	0	0	FALSE	TRUE	normal
17083793	5.19042	NM_001040272	ADAMTSL1	ENSG00000178031	ADAMTSL1	0	0	FALSE	TRUE	normal
17013410	2.6356	NM_024694	ADGB	ENSG00000118492	ADGB	0	0	FALSE	FALSE	normal
16949397	4.33708	NM_001177800	ADIPOQ	ENSG00000181092	ADIPOQ	0	0	FALSE	TRUE	normal
17107749	4.08482	OTTHUMT00000060865	AF003626.1	ENSG00000230153	AF003626.1	0	0	FALSE	TRUE	normal
16818394	4.60784	NM_016633	AHSP	ENSG00000169877	AHSP	0	0	FALSE	TRUE	normal
16760944	4.12487	ENST00000537228	AICDA	ENSG00000111732	AICDA	0	0	FALSE	TRUE	normal
17106609	3.22224	ENST00000371431	AKAP14	ENSG00000186471	AKAP14	0	0	FALSE	TRUE	normal
16878744	5.69753	OTTHUMT00000325125	AL133247.2	ENSG00000228563	AL133247.2	0	0	FALSE	TRUE	normal
16944969	4.97822	ENST00000500525	ALDH1L1-AS2	ENSG00000246022	ALDH1L1-AS2	0	0	FALSE	TRUE	normal
16876686	4.93228	NM_018436	ALLC	ENSG00000151360	ALLC	0	0	FALSE	TRUE	normal
16690682	5.63736	NM_006492	ALX3	ENSG00000156150	ALX3	0	0	FALSE	TRUE	normal
16967523	4.66754	NM_016519	AMBN	ENSG00000178522	AMBN	0	0	FALSE	TRUE	normal
16743614	3.22322	NM_178127	ANGPTL5	ENSG00000187151	ANGPTL5	0	0	FALSE	TRUE	normal
16731384	6.16012	NM_178510	ANKK1	ENSG00000170209	ANKK1	0	0	FALSE	TRUE	normal
16900201	2.97365	NR_003366	ANKRD20A8P	ENSG00000229089	ANKRD20A8P	0	0	FALSE	FALSE	normal
16703934	3.39472	ENST00000374660	ANKRD30A	ENSG00000148513	ANKRD30A	0	0	FALSE	TRUE	normal
16704489	4.461	NM_001278688	ANTXRL	ENSG00000274209	ANTXRL	0	0	FALSE	TRUE	normal
16705277	5.52165	NR_001446	ANXA2P3	ENSG00000216740	ANXA2P3	0	0	FALSE	TRUE	normal
16921818	2.52198	OTTHUMT00000171140	AP000233.3	ENSG00000223870	AP000233.3	0	0	FALSE	FALSE	normal
16728251	4.27872	OTTHUMT00000397433	AP000439.1	ENSG00000255980	AP000439.1	0	0	FALSE	TRUE	normal
16924343	2.70915	OTTHUMT00000158230	AP000998.2	ENSG00000227330	AP000998.2	0	0	FALSE	FALSE	normal
16923583	4.52216	OTTHUMT00000195846	AP001062.9	ENSG00000232969	AP001062.9	0	0	FALSE	TRUE	normal
16921892	3.8318	OTTHUMT00000171649	AP001601.2	ENSG00000223563	AP001601.2	0	0	FALSE	TRUE	normal
16923235	3.51848	OTTHUMT00000195398	AP001625.5	ENSG00000231867	AP001625.5	0	0	FALSE	TRUE	normal
16926078	6.2288	OTTHUMT00000195486	AP001628.7	ENSG00000233754	AP001628.7	0	0	FALSE	TRUE	normal
16732028	5.27627	OTTHUMT00000389307	AP002954.4	ENSG00000255422	AP002954.4	0	0	FALSE	TRUE	normal
16739899	4.50476	OTTHUMT00000104844	AP003774.1	ENSG00000236935	AP003774.1	0	0	FALSE	TRUE	normal
16934458	4.50349	NM_030643	APOL4	ENSG00000100336	APOL4	0	0	FALSE	TRUE	normal
16671405	5.99292	ENST00000355197	AQP10	ENSG00000143595	AQP10	0	0	FALSE	TRUE	normal
16817196	5.50495	NM_001169	AQP8	ENSG00000103375	AQP8	0	0	FALSE	TRUE	normal
17111636	4.69355	NR_046803	ARHGEF9-IT1	ENSG00000231729	ARHGEF9-IT1	0	0	FALSE	TRUE	normal
16938819	3.96389	NM_001267616	ARPP21	ENSG00000172995	ARPP21	0	0	FALSE	TRUE	normal
16734659	5.56813	NM_001079536	ART5	ENSG00000167311	ART5	0	0	FALSE	TRUE	normal
16980905	3.51169	NM_017419	ASIC5	ENSG00000256394	ASIC5	0	0	FALSE	TRUE	normal
16949692	3.1723	NR_046726	ATP13A4-AS1	ENSG00000225473	ATP13A4-AS1	0	0	FALSE	TRUE	normal
16962763	4.75143	NM_198505	ATP13A5	ENSG00000187527	ATP13A5	0	0	FALSE	TRUE	normal
17106645	5.37383	NM_001142447	ATP1B4	ENSG00000101892	ATP1B4	0	0	FALSE	TRUE	normal
16911660	4.57624	NM_001014977	BANF2	ENSG00000125888	BANF2	0	0	FALSE	TRUE	normal
17090640	6.60209	ENST00000263610	BARHL1	ENSG00000125492	BARHL1	0	0	FALSE	TRUE	normal
16968356	5.59661	NM_001201	BMP3	ENSG00000152785	BMP3	0	0	FALSE	TRUE	normal
16946254	5.16791	NR_026783	BPESC1	ENSG00000232416	BPESC1	0	0	FALSE	TRUE	normal
16912790	5.4327	NM_033197	BPIFB1	ENSG00000125999	BPIFB1	0	0	FALSE	TRUE	normal
16954113	2.0653	ENST00000442384	BSN-AS1	ENSG00000235120	BSN-AS1	0	0	FALSE	FALSE	normal
16700243	5.45236	NM_001287262	BTNL10	ENSG00000215811	BTNL10	0	0	FALSE	TRUE	normal
16993538	4.46676	NM_001040462	BTNL8	ENSG00000113303	BTNL8	0	0	FALSE	TRUE	normal
16727628	5.88408	ENST00000308963	C11orf86	ENSG00000173237	C11orf86	0	0	FALSE	TRUE	normal
16737194	7.10699	NM_001166692	C11orf91	ENSG00000205177	C11orf91	0	0	FALSE	TRUE	normal
16769315	4.90099	NM_001278419	C12orf42	ENSG00000179088	C12orf42	0	0	FALSE	TRUE	normal
16807337	5.58767	ENST00000559727	C15orf56	ENSG00000176753	C15orf56	0	0	FALSE	TRUE	normal
16823359	6.1184	XM_005255502	C16orf90	ENSG00000215131	C16orf90	0	0	FALSE	TRUE	normal
16843315	4.39308	NM_207454	C17orf102	ENSG00000197322	C17orf102	0	0	FALSE	TRUE	normal
16844026	5.84713	NM_001080465	C17orf98	ENSG00000275489	C17orf98	0	0	FALSE	TRUE	normal
16853051	3.30599	NM_001174123	C18orf63	ENSG00000206043	C18orf63	0	0	FALSE	TRUE	normal
16687931	4.20011	NM_152377	C1orf87	ENSG00000162598	C1orf87	0	0	FALSE	TRUE	normal
16777452	2.59353	ENST00000449656	C1QTNF9-AS1	ENSG00000240868	C1QTNF9-AS1	0	0	FALSE	FALSE	normal
16918736	5.76341	NR_026933	C20orf173	ENSG00000125975	C20orf173	0	0	FALSE	TRUE	normal
16910674	5.89439	NM_001009612	C20orf202	ENSG00000215595	C20orf202	0	0	FALSE	TRUE	normal
16974001	4.83185	ENST00000324058	C4orf50	ENSG00000181215	C4orf50	0	0	FALSE	TRUE	normal
17001357	4.03231	NM_206966	C5orf46	ENSG00000178776	C5orf46	0	0	FALSE	TRUE	normal
17069782	5.00508	NM_052958	C8orf34	ENSG00000165084	C8orf34	0	0	FALSE	TRUE	normal
17076459	5.40737	NM_207412	C8orf86	ENSG00000196166	C8orf86	0	0	FALSE	TRUE	normal
17099052	6.35344	NM_199350	C9orf50	ENSG00000179058	C9orf50	0	0	FALSE	TRUE	normal
17092642	2.98259	NM_001271829	C9orf92	ENSG00000205549	C9orf92	0	0	FALSE	FALSE	normal
17084723	5.08212	NM_001216	CA9	ENSG00000107159	CA9	0	0	FALSE	TRUE	normal
16759998	3.22514	NR_046578	CACNA1C-AS4	ENSG00000256025	CACNA1C-AS4	0	0	FALSE	TRUE	normal
16746804	4.31702	NR_046769	CACNA1C-IT3	ENSG00000256721	CACNA1C-IT3	0	0	FALSE	TRUE	normal
17110849	5.75432	NM_001256789	CACNA1F	ENSG00000102001	CACNA1F	0	0	FALSE	TRUE	normal
16837172	5.4156	NM_014405	CACNG4	ENSG00000075461	CACNG4	0	0	FALSE	TRUE	normal
16820849	5.44128	NM_001740	CALB2	ENSG00000172137	CALB2	0	0	FALSE	TRUE	normal
16719868	6.30918	NM_015722	CALY	ENSG00000130643	CALY	0	0	FALSE	TRUE	normal
16699672	5.60272	NM_001143962	CAPN8	ENSG00000203697	CAPN8	0	0	FALSE	TRUE	normal
16743874	3.57307	NM_001136109	CASP5	ENSG00000137757	CASP5	0	0	FALSE	TRUE	normal
16672567	5.25751	NM_001231	CASQ1	ENSG00000143318	CASQ1	0	0	FALSE	TRUE	normal
16944632	5.79144	NM_000388	CASR	ENSG00000036828	CASR	0	0	FALSE	TRUE	normal
16908368	5.77934	NR_110573	CATIP-AS1	ENSG00000225062	CATIP-AS1	0	0	FALSE	TRUE	normal
16795908	3.03884	NM_024764	CATSPERB	ENSG00000133962	CATSPERB	0	0	FALSE	TRUE	normal
16707836	2.81357	NM_001159747	CC2D2B	ENSG00000188649	CC2D2B	0	0	FALSE	FALSE	normal
16774994	5.57136	NM_031290	CCDC70	ENSG00000123171	CCDC70	0	0	FALSE	TRUE	normal
16843309	5.46852	NM_002981	CCL1	ENSG00000108702	CCL1	0	0	FALSE	TRUE	normal
17093536	6.16931	NM_006274	CCL19	ENSG00000172724	CCL19	0	0	FALSE	TRUE	normal
16857842	5.4372	NM_001201359	CCL25	ENSG00000131142	CCL25	0	0	FALSE	TRUE	normal
17058863	5.21974	NM_006072	CCL26	ENSG00000006606	CCL26	0	0	FALSE	TRUE	normal
16833224	4.18635	NM_005623	CCL8	ENSG00000108700	CCL8	0	0	FALSE	TRUE	normal
16760792	4.24434	NM_004244	CD163	ENSG00000177575	CD163	0	0	FALSE	TRUE	normal
16672315	5.30989	NM_001763	CD1A	ENSG00000158477	CD1A	0	0	FALSE	TRUE	normal
16740725	6.24012	NM_020404	CD248	ENSG00000174807	CD248	0	0	FALSE	TRUE	normal
16848593	6.41804	NM_006678	CD300C	ENSG00000167850	CD300C	0	0	FALSE	TRUE	normal
16848609	6.27721	NM_181449	CD300E	ENSG00000186407	CD300E	0	0	FALSE	TRUE	normal
16848583	5.81417	NM_174892	CD300LB	ENSG00000178789	CD300LB	0	0	FALSE	TRUE	normal
16761201	3.94421	NM_001781	CD69	ENSG00000110848	CD69	0	0	FALSE	TRUE	normal
16687505	5.29851	NM_201546	CDCP2	ENSG00000157211	CDCP2	0	0	FALSE	TRUE	normal
16852702	4.81568	NM_031891	CDH20	ENSG00000101542	CDH20	0	0	FALSE	TRUE	normal
16919784	5.63244	NM_021248	CDH22	ENSG00000149654	CDH22	0	0	FALSE	TRUE	normal
16954191	4.91146	NM_001007540	CDHR4	ENSG00000187492	CDHR4	0	0	FALSE	TRUE	normal
16873190	5.92958	NM_001102597	CEACAM20	ENSG00000273777	CEACAM20	0	0	FALSE	TRUE	normal
16862563	3.92332	NM_002483	CEACAM6	ENSG00000086548	CEACAM6	0	0	FALSE	TRUE	normal
17122132	5.65362	ENST00000434624	CEACAMP1	ENSG00000233681	CEACAMP1	0	0	FALSE	TRUE	normal
17090727	3.39664	NR_001275	CELP	ENSG00000170827	CELP	0	0	FALSE	TRUE	normal
16704796	5.3319	BC130615	CHAT	ENSG00000070748	CHAT	0	0	FALSE	TRUE	normal
17052060	5.00855	NM_000739	CHRM2	ENSG00000181072	CHRM2	0	0	FALSE	TRUE	normal
16966240	4.48618	NM_017581	CHRNA9	ENSG00000174343	CHRNA9	0	0	FALSE	TRUE	normal
16812192	5.2977	uc010blh.1	CHRNB4	ENSG00000117971	CHRNB4	0	0	FALSE	TRUE	normal
16785437	8.0883	NM_001202558	CHURC1-FNTB	ENSG00000125954	CHURC1-FNTB	0	0	FALSE	TRUE	normal
16810713	5.30013	NM_003613	CILP	ENSG00000138615	CILP	0	0	FALSE	TRUE	normal
16860074	5.84829	NM_153221	CILP2	ENSG00000160161	CILP2	0	0	FALSE	TRUE	normal
16748262	2.96577	NM_001129998	CLEC12B	ENSG00000256660	CLEC12B	0	0	FALSE	FALSE	normal
17063722	4.00077	NM_013252	CLEC5A	ENSG00000258227	CLEC5A	0	0	FALSE	TRUE	normal
16974325	3.35199	NM_052964	CLNK	ENSG00000109684	CLNK	0	0	FALSE	TRUE	normal
16791419	4.31189	NM_001836	CMA1	ENSG00000092009	CMA1	0	0	FALSE	TRUE	normal
16769690	6.41979	NM_001142343	CMKLR1	ENSG00000174600	CMKLR1	0	0	FALSE	TRUE	normal
17020268	4.38351	NM_030820	COL21A1	ENSG00000124749	COL21A1	0	0	FALSE	TRUE	normal
16946744	3.64707	NM_001870	CPA3	ENSG00000163751	CPA3	0	0	FALSE	TRUE	normal
17077974	2.94098	NM_020361	CPA6	ENSG00000165078	CPA6	0	0	FALSE	FALSE	normal
16870087	6.16736	NM_015692	CPAMD8	ENSG00000160111	CPAMD8	0	0	FALSE	TRUE	normal
16855572	3.2239	NM_181654	CPLX4	ENSG00000166569	CPLX4	0	0	FALSE	TRUE	normal
16890037	4.62881	NM_173077	CPO	ENSG00000144410	CPO	0	0	FALSE	TRUE	normal
17105224	3.83101	NM_001184771	CPXCR1	ENSG00000147183	CPXCR1	0	0	FALSE	TRUE	normal
16676795	3.9386	NM_001006658	CR2	ENSG00000117322	CR2	0	0	FALSE	TRUE	normal
17019864	2.33731	NM_001142407	CRISP2	ENSG00000124490	CRISP2	0	0	FALSE	FALSE	normal
16928553	5.50755	NM_001886	CRYBA4	ENSG00000196431	CRYBA4	0	0	FALSE	TRUE	normal
16929677	6.04705	NM_000395	CSF2RB	ENSG00000100368	CSF2RB	0	0	FALSE	TRUE	normal
16833953	6.50273	NM_000759	CSF3	ENSG00000108342	CSF3	0	0	FALSE	TRUE	normal
16727232	6.73537	NM_001323	CST6	ENSG00000175315	CST6	0	0	FALSE	TRUE	normal
16944647	3.75322	NM_005213	CSTA	ENSG00000121552	CSTA	0	0	FALSE	TRUE	normal
17113513	6.4759	NM_001017978	CT83	ENSG00000204019	CT83	0	0	FALSE	TRUE	normal
16928399	2.6343	OTTHUMT00000320348	CTA-221G9.7	ENSG00000236641	CTA-221G9.7	0	0	FALSE	FALSE	normal
17070485	2.14198	OTTHUMT00000374498	CTA-392E5.1	ENSG00000253154	CTA-392E5.1	0	0	FALSE	FALSE	normal
16928626	5.12604	OTTHUMT00000320630	CTA-929C8.8	ENSG00000230051	CTA-929C8.8	0	0	FALSE	TRUE	normal
17063975	5.11149	NM_178561	CTAGE6	ENSG00000271321	CTAGE6	0	0	FALSE	TRUE	normal
16989448	5.99359	OTTHUMT00000371695	CTB-138E5.1	ENSG00000249639	CTB-138E5.1	0	0	FALSE	TRUE	normal
17000677	5.90233	OTTHUMT00000372776	CTB-35F21.3	ENSG00000251387	CTB-35F21.3	0	0	FALSE	TRUE	normal
16992442	4.67803	OTTHUMT00000372514	CTC-308K20.2	ENSG00000254295	CTC-308K20.2	0	0	FALSE	TRUE	normal
17000736	5.7037	OTTHUMT00000374363	CTC-329D1.3	ENSG00000253965	CTC-329D1.3	0	0	FALSE	TRUE	normal
16862656	5.4922	OTTHUMT00000416146	CTC-378H22.2	ENSG00000259436	CTC-378H22.2	0	0	FALSE	TRUE	normal
16997586	6.05424	OTTHUMT00000369922	CTC-431G16.2	ENSG00000250258	CTC-431G16.2	0	0	FALSE	TRUE	normal
16991632	2.79295	OTTHUMT00000373937	CTC-436K13.3	ENSG00000253424	CTC-436K13.3	0	0	FALSE	FALSE	normal
16996880	2.27222	OTTHUMT00000368691	CTC-498J12.1	ENSG00000250237	CTC-498J12.1	0	0	FALSE	FALSE	normal
16997928	2.98856	OTTHUMT00000370142	CTC-498M16.4	ENSG00000271904	CTC-498M16.4	0	0	FALSE	FALSE	normal
16996847	5.04663	OTTHUMT00000368587	CTC-537E7.3	ENSG00000248884	CTC-537E7.3	0	0	FALSE	TRUE	normal
16998789	2.7281	OTTHUMT00000372487	CTC-551A13.1	ENSG00000248428	CTC-551A13.1	0	0	FALSE	FALSE	normal
16997172	5.0066	OTTHUMT00000368964	CTC-575I10.1	ENSG00000249293	CTC-575I10.1	0	0	FALSE	TRUE	normal
16999564	5.30538	OTTHUMT00000371451	CTC-575N7.1	ENSG00000251680	CTC-575N7.1	0	0	FALSE	TRUE	normal
16729784	4.86599	OTTHUMT00000393803	CTD-2005H7.2	ENSG00000255250	CTD-2005H7.2	0	0	FALSE	TRUE	normal
16997769	2.59262	OTTHUMT00000370364	CTD-2015A6.1	ENSG00000248393	CTD-2015A6.1	0	0	FALSE	FALSE	normal
16997771	3.6126	OTTHUMT00000370360	CTD-2015A6.2	ENSG00000248870	CTD-2015A6.2	0	0	FALSE	TRUE	normal
16788449	6.04253	OTTHUMT00000414338	CTD-2062F14.3	ENSG00000259031	CTD-2062F14.3	0	0	FALSE	TRUE	normal
16996478	3.71278	OTTHUMT00000367876	CTD-2176I21.2	ENSG00000248733	CTD-2176I21.2	0	0	FALSE	TRUE	normal
16982750	5.09701	NR_109912	CTD-2194D22.4	ENSG00000249326	CTD-2194D22.4	0	0	FALSE	TRUE	normal
16786470	6.48359	OTTHUMT00000413602	CTD-2207P18.1	ENSG00000258425	CTD-2207P18.1	0	0	FALSE	TRUE	normal
16998446	4.51104	OTTHUMT00000370876	CTD-2215E18.3	ENSG00000251054	CTD-2215E18.3	0	0	FALSE	TRUE	normal
16994025	5.29681	OTTHUMT00000369485	CTD-2245E15.3	ENSG00000251532	CTD-2245E15.3	0	0	FALSE	TRUE	normal
16858725	4.82297	OTTHUMT00000451541	CTD-2265O21.3	ENSG00000267424	CTD-2265O21.3	0	0	FALSE	TRUE	normal
16983016	4.17884	OTTHUMT00000366354	CTD-2296D1.1	ENSG00000251678	CTD-2296D1.1	0	0	FALSE	TRUE	normal
16994143	7.06612	NR_109915	CTD-2297D10.2	ENSG00000250579	CTD-2297D10.2	0	0	FALSE	TRUE	normal
16994813	2.52252	OTTHUMT00000366520	CTD-2306M5.1	ENSG00000248605	CTD-2306M5.1	0	0	FALSE	FALSE	normal
16813459	3.48429	OTTHUMT00000414950	CTD-2313J17.1	ENSG00000258922	CTD-2313J17.1	0	0	FALSE	TRUE	normal
16986959	2.44409	OTTHUMT00000369662	CTD-2331D11.4	ENSG00000249842	CTD-2331D11.4	0	0	FALSE	FALSE	normal
16987655	4.42879	OTTHUMT00000370331	CTD-2333K2.1	ENSG00000248261	CTD-2333K2.1	0	0	FALSE	TRUE	normal
16998663	5.03852	OTTHUMT00000374820	CTD-2374C24.1	ENSG00000253584	CTD-2374C24.1	0	0	FALSE	TRUE	normal
16829290	6.23556	OTTHUMT00000430645	CTD-2555A7.2	ENSG00000256982	CTD-2555A7.2	0	0	FALSE	TRUE	normal
17122080	6.04694	OTTHUMT00000463423	CTD-2626G11.2	ENSG00000268416	CTD-2626G11.2	0	0	FALSE	TRUE	normal
16723157	4.73452	OTTHUMT00000387992	CTD-3012A18.1	ENSG00000255029	CTD-3012A18.1	0	0	FALSE	TRUE	normal
16740825	6.56493	OTTHUMT00000362463	CTD-3074O7.2	ENSG00000250105	CTD-3074O7.2	0	0	FALSE	TRUE	normal
16858647	4.54245	OTTHUMT00000344130	CTD-3105H18.7	ENSG00000234848	CTD-3105H18.7	0	0	FALSE	TRUE	normal
16828415	5.92692	ENST00000481611	CTRB2	ENSG00000168928	CTRB2	0	0	FALSE	TRUE	normal
17086561	3.38415	NR_033405	CTSLP8	ENSG00000234575	CTSLP8	0	0	FALSE	TRUE	normal
16854114	4.667	NR_024076	CXADRP3	ENSG00000265766	CXADRP3	0	0	FALSE	TRUE	normal
16977052	3.53046	NM_001565	CXCL10	ENSG00000169245	CXCL10	0	0	FALSE	TRUE	normal
16977058	4.52815	NM_005409	CXCL11	ENSG00000169248	CXCL11	0	0	FALSE	TRUE	normal
16968098	3.21765	NM_006419	CXCL13	ENSG00000156234	CXCL13	0	0	FALSE	TRUE	normal
16976827	5.35104	NM_002994	CXCL5	ENSG00000163735	CXCL5	0	0	FALSE	TRUE	normal
16668572	5.69281	NR_003599	CYMP	ENSG00000240194	CYMP	0	0	FALSE	TRUE	normal
16920497	4.31515	NM_000782	CYP24A1	ENSG00000019186	CYP24A1	0	0	FALSE	TRUE	normal
16707534	5.76523	NM_183374	CYP26C1	ENSG00000187553	CYP26C1	0	0	FALSE	TRUE	normal
16872528	7.66755	NM_000764	CYP2A7	ENSG00000198077	CYP2A7	0	0	FALSE	TRUE	normal
16862368	5.44889	NR_040249	CYP2G1P	ENSG00000130612	CYP2G1P	0	0	FALSE	TRUE	normal
16862427	6.75474	NM_030622	CYP2S1	ENSG00000167600	CYP2S1	0	0	FALSE	TRUE	normal
17049032	3.16193	NM_022820	CYP3A43	ENSG00000021461	CYP3A43	0	0	FALSE	TRUE	normal
16859148	5.69788	NM_007253	CYP4F8	ENSG00000186526	CYP4F8	0	0	FALSE	TRUE	normal
16664388	4.56415	NM_178033	CYP4X1	ENSG00000186377	CYP4X1	0	0	FALSE	TRUE	normal
17077442	3.97868	NM_000780	CYP7A1	ENSG00000167910	CYP7A1	0	0	FALSE	TRUE	normal
16774724	4.52873	NM_020377	CYSLTR2	ENSG00000152207	CYSLTR2	0	0	FALSE	TRUE	normal
16924592	5.0252	AK304124	CYYR1	ENSG00000166265	CYYR1	0	0	FALSE	TRUE	normal
16858800	6.88591	NM_152654	DAND5	ENSG00000179284	DAND5	0	0	FALSE	TRUE	normal
16951332	4.62757	NM_001190811	DAZL	ENSG00000092345	DAZL	0	0	FALSE	TRUE	normal
17099578	5.59016	NR_102735	DBH-AS1	ENSG00000225756	DBH-AS1	0	0	FALSE	TRUE	normal
17113378	4.58339	NM_000555	DCX	ENSG00000077279	DCX	0	0	FALSE	TRUE	normal
17074296	4.08929	NM_005218	DEFB1	ENSG00000164825	DEFB1	0	0	FALSE	TRUE	normal
17104427	4.58309	NM_198512	DGAT2L6	ENSG00000184210	DGAT2L6	0	0	FALSE	TRUE	normal
16926984	5.5704	uc002zoi.4	DGCR6	ENSG00000183628	DGCR6	0	0	FALSE	TRUE	normal
17110948	5.34268	NM_001013742	DGKK	ENSG00000274588	DGKK	0	0	FALSE	TRUE	normal
16887237	3.2391	NM_001142270	DHRS9	ENSG00000073737	DHRS9	0	0	FALSE	TRUE	normal
17095656	5.62295	NM_017594	DIRAS2	ENSG00000165023	DIRAS2	0	0	FALSE	TRUE	normal
17099885	5.75567	NR_026964	DKFZP434A062	ENSG00000262075	DKFZP434A062	0	0	FALSE	TRUE	normal
16864076	6.26876	NM_001197301	DKKL1	ENSG00000104901	DKKL1	0	0	FALSE	TRUE	normal
17065138	5.22079	NM_001277161	DLGAP2	ENSG00000198010	DLGAP2	0	0	FALSE	TRUE	normal
17074091	5.18215	ENST00000518009	DLGAP2-AS1	ENSG00000253267	DLGAP2-AS1	0	0	FALSE	TRUE	normal
16788475	5.4283	NM_003836	DLK1	ENSG00000185559	DLK1	0	0	FALSE	TRUE	normal
16686945	4.52776	NM_032110	DMRTA2	ENSG00000142700	DMRTA2	0	0	FALSE	TRUE	normal
16837516	5.77897	NM_001172810	DNAI2	ENSG00000171595	DNAI2	0	0	FALSE	TRUE	normal
16878191	4.04044	NM_173650	DNAJC5G	ENSG00000163793	DNAJC5G	0	0	FALSE	TRUE	normal
17053804	5.13807	NM_001039350	DPP6	ENSG00000130226	DPP6	0	0	FALSE	TRUE	normal
17002962	5.08037	NM_000794	DRD1	ENSG00000184845	DRD1	0	0	FALSE	TRUE	normal
16925809	4.60141	NM_001271534	DSCAM	ENSG00000171587	DSCAM	0	0	FALSE	TRUE	normal
16744848	6.08109	NM_020693	DSCAML1	ENSG00000177103	DSCAML1	0	0	FALSE	TRUE	normal
16965880	2.78605	NM_001136536	DTHD1	ENSG00000197057	DTHD1	0	0	FALSE	FALSE	normal
16808609	6.23181	NM_001276267	DUOXA1	ENSG00000140254	DUOXA1	0	0	FALSE	TRUE	normal
16715738	6.0409	NM_001007272	DUSP13	ENSG00000079393	DUSP13	0	0	FALSE	TRUE	normal
16875941	3.57351	NM_001012729	DUXA	ENSG00000258873	DUXA	0	0	FALSE	TRUE	normal
16716082	3.16515	NM_001269053	DYDC1	ENSG00000170788	DYDC1	0	0	FALSE	TRUE	normal
16909567	6.01707	NM_001290787	ECEL1	ENSG00000171551	ECEL1	0	0	FALSE	TRUE	normal
16915412	6.22298	NM_000114	EDN3	ENSG00000124205	EDN3	0	0	FALSE	TRUE	normal
16775611	2.89916	NR_103853	EDNRB-AS1	ENSG00000225579	EDNRB-AS1	0	0	FALSE	FALSE	normal
16899032	5.02758	NM_001965	EGR4	ENSG00000135625	EGR4	0	0	FALSE	TRUE	normal
16992879	6.31685	ENST00000515458	EIF4E1B	ENSG00000175766	EIF4E1B	0	0	FALSE	TRUE	normal
16737282	4.88648	NM_001243080	ELF5	ENSG00000135374	ELF5	0	0	FALSE	TRUE	normal
16863723	4.35749	NM_022142	ELSPBP1	ENSG00000169393	ELSPBP1	0	0	FALSE	TRUE	normal
16981931	4.5412	NM_153343	ENPP6	ENSG00000164303	ENPP6	0	0	FALSE	TRUE	normal
17100467	6.54182	NM_001033113	ENTPD8	ENSG00000188833	ENTPD8	0	0	FALSE	TRUE	normal
17052690	6.07244	NM_001280794	EPHB6	ENSG00000106123	EPHB6	0	0	FALSE	TRUE	normal
16768391	3.43955	ENST00000550203	EPYC	ENSG00000083782	EPYC	0	0	FALSE	TRUE	normal
16967843	4.46603	NM_001432	EREG	ENSG00000124882	EREG	0	0	FALSE	TRUE	normal
16666200	3.81569	NR_121670	ERICH3-AS1	ENSG00000234497	ERICH3-AS1	0	0	FALSE	TRUE	normal
16864905	4.7144	NM_152473	ERVV-1	ENSG00000269526	ERVV-1	0	0	FALSE	TRUE	normal
16864907	10.463	NM_001191055	ERVV-2	ENSG00000268964	ERVV-2	0	0	FALSE	TRUE	normal
16789127	6.38245	NM_001077594	EXOC3L4	ENSG00000205436	EXOC3L4	0	0	FALSE	TRUE	normal
16884747	5.41354	NR_026821	FAM138B	ENSG00000226516	FAM138B	0	0	FALSE	TRUE	normal
16943401	5.04227	NR_036433	FAM172BP	ENSG00000175841	FAM172BP	0	0	FALSE	TRUE	normal
16796159	5.47714	ENST00000554742	FAM181A-AS1	ENSG00000258584	FAM181A-AS1	0	0	FALSE	TRUE	normal
16806445	5.51128	NM_015307	FAM189A1	ENSG00000104059	FAM189A1	0	0	FALSE	TRUE	normal
16710223	3.86943	NM_001029888	FAM24A	ENSG00000203795	FAM24A	0	0	FALSE	TRUE	normal
17123488	7.63486	ENST00000340703	FAM86MP	ENSG00000186234	FAM86MP	0	0	FALSE	TRUE	normal
16864920	6.1833	ENST00000593323	FAM90A27P	ENSG00000189348	FAM90A27P	0	0	FALSE	TRUE	normal
17107816	5.49199	NM_033085	FATE1	ENSG00000147378	FATE1	0	0	FALSE	TRUE	normal
16698734	5.29429	NM_001122979	FCAMR	ENSG00000162897	FCAMR	0	0	FALSE	TRUE	normal
16694980	5.17267	NM_001159397	FCRL1	ENSG00000163534	FCRL1	0	0	FALSE	TRUE	normal
16694928	4.92785	NM_052939	FCRL3	ENSG00000160856	FCRL3	0	0	FALSE	TRUE	normal
17080834	4.78622	NR_040044	FER1L6-AS1	ENSG00000181171	FER1L6-AS1	0	0	FALSE	TRUE	normal
16949322	5.10606	NM_014375	FETUB	ENSG00000090512	FETUB	0	0	FALSE	TRUE	normal
16861010	7.06885	NM_005303	FFAR1	ENSG00000126266	FFAR1	0	0	FALSE	TRUE	normal
17008056	4.99374	NM_173558	FGD2	ENSG00000146192	FGD2	0	0	FALSE	TRUE	normal
17066436	5.97709	ENST00000359441	FGF17	ENSG00000158815	FGF17	0	0	FALSE	TRUE	normal
16717764	6.06014	NM_033163	FGF8	ENSG00000107831	FGF8	0	0	FALSE	TRUE	normal
16668033	4.66807	NM_001144937	FNDC7	ENSG00000143107	FNDC7	0	0	FALSE	TRUE	normal
16833297	5.16028	NM_017559	FNDC8	ENSG00000073598	FNDC8	0	0	FALSE	TRUE	normal
16728642	5.64914	NM_000803	FOLR2	ENSG00000165457	FOLR2	0	0	FALSE	TRUE	normal
16900050	5.7929	NM_001135649	FOXI3	ENSG00000214336	FOXI3	0	0	FALSE	TRUE	normal
16874945	4.68014	NM_001193306	FPR1	ENSG00000171051	FPR1	0	0	FALSE	TRUE	normal
16864756	4.30052	NM_002030	FPR3	ENSG00000187474	FPR3	0	0	FALSE	TRUE	normal
16980231	4.83478	NM_001168235	FREM3	ENSG00000183090	FREM3	0	0	FALSE	TRUE	normal
17025775	5.17399	NM_001122841	FRMD1	ENSG00000153303	FRMD1	0	0	FALSE	TRUE	normal
17085015	4.58085	ENST00000377765	FRMPD1	ENSG00000070601	FRMPD1	0	0	FALSE	TRUE	normal
16897427	4.3549	NM_000145	FSHR	ENSG00000170820	FSHR	0	0	FALSE	TRUE	normal
16867579	6.21251	NM_002034	FUT5	ENSG00000130383	FUT5	0	0	FALSE	TRUE	normal
16704199	6.09065	NM_001184963	FXYD4	ENSG00000150201	FXYD4	0	0	FALSE	TRUE	normal
16887228	3.97066	NM_001081686	G6PC2	ENSG00000152254	G6PC2	0	0	FALSE	TRUE	normal
17103608	4.76197	NM_001098413	GAGE10	ENSG00000215274	GAGE10	0	0	FALSE	TRUE	normal
16772588	5.86802	NM_001122636	GALNT9	ENSG00000182870	GALNT9	0	0	FALSE	TRUE	normal
17053711	4.42926	ENST00000414073	GALNTL5	ENSG00000106648	GALNTL5	0	0	FALSE	TRUE	normal
16944251	5.56803	NM_001130064	GAP43	ENSG00000172020	GAP43	0	0	FALSE	TRUE	normal
17015629	5.15633	NM_004752	GCM2	ENSG00000124827	GCM2	0	0	FALSE	TRUE	normal
16864105	4.07397	NM_001195256	GFY	ENSG00000261949	GFY	0	0	FALSE	TRUE	normal
16662322	5.57551	NM_001005752	GJB3	ENSG00000188910	GJB3	0	0	FALSE	TRUE	normal
16662317	5.19816	NM_153212	GJB4	ENSG00000189433	GJB4	0	0	FALSE	TRUE	normal
16662313	5.71184	NM_005268	GJB5	ENSG00000189280	GJB5	0	0	FALSE	TRUE	normal
16977248	3.85824	NM_033214	GK2	ENSG00000196475	GK2	0	0	FALSE	TRUE	normal
16687403	6.6048	NM_147193	GLIS1	ENSG00000174332	GLIS1	0	0	FALSE	TRUE	normal
17008325	5.44958	NM_002062	GLP1R	ENSG00000112164	GLP1R	0	0	FALSE	TRUE	normal
16831063	4.87145	ENST00000262441	GLP2R	ENSG00000065325	GLP2R	0	0	FALSE	TRUE	normal
16759106	4.66876	NM_144669	GLT1D1	ENSG00000151948	GLT1D1	0	0	FALSE	TRUE	normal
16940951	5.09526	NM_000172	GNAT1	ENSG00000114349	GNAT1	0	0	FALSE	TRUE	normal
16873567	6.61904	NM_033258	GNG8	ENSG00000167414	GNG8	0	0	FALSE	TRUE	normal
16780189	3.62362	NR_046520	GPC5-AS1	ENSG00000235984	GPC5-AS1	0	0	FALSE	TRUE	normal
16780186	3.24771	ENST00000417589	GPC5-AS2	ENSG00000232885	GPC5-AS2	0	0	FALSE	TRUE	normal
16740211	6.36249	NM_130769	GPHA2	ENSG00000149735	GPHA2	0	0	FALSE	TRUE	normal
16893246	5.94952	NM_001195381	GPR35	ENSG00000178623	GPR35	0	0	FALSE	TRUE	normal
16787208	3.91325	NM_003608	GPR65	ENSG00000140030	GPR65	0	0	FALSE	TRUE	normal
16765537	4.54946	ENST00000551809	GPR84	ENSG00000139572	GPR84	0	0	FALSE	TRUE	normal
17055052	6.29806	NM_001145118	GRID2IP	ENSG00000215045	GRID2IP	0	0	FALSE	TRUE	normal
16922049	3.60722	NR_027021	GRIK1-AS1	ENSG00000174680	GRIK1-AS1	0	0	FALSE	TRUE	normal
16856338	6.11524	NM_138690	GRIN3B	ENSG00000116032	GRIN3B	0	0	FALSE	TRUE	normal
17018347	6.2581	NM_000841	GRM4	ENSG00000124493	GRM4	0	0	FALSE	TRUE	normal
17003613	4.98372	NM_000843	GRM6	ENSG00000113262	GRM6	0	0	FALSE	TRUE	normal
16852676	7.10059	NM_001012512	GRP	ENSG00000134443	GRP	0	0	FALSE	TRUE	normal
16989484	4.10203	OTTHUMT00000381627	GS1-39E22.2	ENSG00000254239	GS1-39E22.2	0	0	FALSE	TRUE	normal
16833921	6.21975	NM_178171	GSDMA	ENSG00000167914	GSDMA	0	0	FALSE	TRUE	normal
16668397	5.11015	NM_000851	GSTM5	ENSG00000134201	GSTM5	0	0	FALSE	TRUE	normal
16830863	6.32464	NM_000180	GUCY2D	ENSG00000132518	GUCY2D	0	0	FALSE	TRUE	normal
16742391	6.14186	NR_024042	GUCY2EP	ENSG00000204529	GUCY2EP	0	0	FALSE	TRUE	normal
16980267	2.96043	NM_002099	GYPA	ENSG00000170180	GYPA	0	0	FALSE	FALSE	normal
17104283	5.16927	NM_001130860	HEPH	ENSG00000089472	HEPH	0	0	FALSE	TRUE	normal
16658385	6.7123	NM_001024598	HES3	ENSG00000173673	HES3	0	0	FALSE	TRUE	normal
16964455	5.88246	NM_001297439	HGFAC	ENSG00000109758	HGFAC	0	0	FALSE	TRUE	normal
16943656	2.93259	NM_001282556	HHLA2	ENSG00000114455	HHLA2	0	0	FALSE	FALSE	normal
16863423	5.70555	NM_022462	HIF3A	ENSG00000124440	HIF3A	0	0	FALSE	TRUE	normal
16872421	6.0007	NM_144685	HIPK4	ENSG00000160396	HIPK4	0	0	FALSE	TRUE	normal
17003124	4.74599	NM_002115	HK3	ENSG00000160883	HK3	0	0	FALSE	TRUE	normal
17023807	5.78664	NR_037938	HMGA1P7	ENSG00000216753	HMGA1P7	0	0	FALSE	TRUE	normal
16855539	7.11306	ENST00000589286	HMGN1P30	ENSG00000235028	HMGN1P30	0	0	FALSE	TRUE	normal
16771390	4.69889	NR_024345	HNF1A-AS1	ENSG00000241388	HNF1A-AS1	0	0	FALSE	TRUE	normal
16843853	4.47091	NM_000458	HNF1B	ENSG00000275410	HNF1B	0	0	FALSE	TRUE	normal
16681884	5.91077	uc010obg.2	HNRNPCL2	ENSG00000275774	HNRNPCL2	0	0	FALSE	TRUE	normal
17081321	4.12042	NR_026684	HPYR1	ENSG00000253521	HPYR1	0	0	FALSE	TRUE	normal
16841525	4.81444	NM_006042	HS3ST3A1	ENSG00000153976	HS3ST3A1	0	0	FALSE	TRUE	normal
16926801	3.1777	NR_003607	HSFY1P1	ENSG00000229027	HSFY1P1	0	0	FALSE	TRUE	normal
16984768	4.28275	NM_006308	HSPB3	ENSG00000169271	HSPB3	0	0	FALSE	TRUE	normal
16948632	3.73079	NM_001145143	HTR3D	ENSG00000186090	HTR3D	0	0	FALSE	TRUE	normal
16948659	3.71344	NM_001256614	HTR3E	ENSG00000186038	HTR3E	0	0	FALSE	TRUE	normal
16749095	3.17715	NM_000415	IAPP	ENSG00000121351	IAPP	0	0	FALSE	TRUE	normal
16968653	3.94479	NM_004967	IBSP	ENSG00000029559	IBSP	0	0	FALSE	TRUE	normal
16868679	6.98449	NM_002162	ICAM3	ENSG00000076662	ICAM3	0	0	FALSE	TRUE	normal
17092875	2.3966	NM_176891	IFNE	ENSG00000184995	IFNE	0	0	FALSE	FALSE	normal
16863393	4.84621	NM_001002915	IGFL2	ENSG00000204866	IGFL2	0	0	FALSE	TRUE	normal
16797336	7.39324	ENST00000390539	IGHA2	ENSG00000211890	IGHA2	0	0	FALSE	TRUE	normal
16797340	6.32327	ENST00000390541	IGHE	ENSG00000211891	IGHE	0	0	FALSE	TRUE	normal
16797353	5.26816	ENST00000390543	IGHG4	ENSG00000211892	IGHG4	0	0	FALSE	TRUE	normal
16797563	6.47771	ENST00000390626	IGHV5-51	ENSG00000211966	IGHV5-51	0	0	FALSE	TRUE	normal
16882744	5.89101	ENST00000453184	IGKV1D-27	ENSG00000224607	IGKV1D-27	0	0	FALSE	TRUE	normal
16928411	7.35598	NR_029395	IGLL3P	ENSG00000206066	IGLL3P	0	0	FALSE	TRUE	normal
16927827	6.82831	ENST00000390316	IGLV3-9	ENSG00000211670	IGLV3-9	0	0	FALSE	TRUE	normal
16821830	6.42507	NM_013278	IL17C	ENSG00000124391	IL17C	0	0	FALSE	TRUE	normal
16820822	5.24429	NM_001172771	IL34	ENSG00000157368	IL34	0	0	FALSE	TRUE	normal
16884594	5.30126	NM_019618	IL36G	ENSG00000136688	IL36G	0	0	FALSE	TRUE	normal
16884607	5.49062	NM_012275	IL36RN	ENSG00000136695	IL36RN	0	0	FALSE	TRUE	normal
16874432	7.31427	uc002pqv.2	IL4I1	ENSG00000104951	IL4I1	0	0	FALSE	TRUE	normal
16999799	3.36306	NM_000879	IL5	ENSG00000113525	IL5	0	0	FALSE	TRUE	normal
17000180	4.32846	NM_000590	IL9	ENSG00000145839	IL9	0	0	FALSE	TRUE	normal
16958065	5.8348	NM_001199799	ILDR1	ENSG00000145103	ILDR1	0	0	FALSE	TRUE	normal
16941252	4.83245	NM_001085479	IQCF3	ENSG00000229972	IQCF3	0	0	FALSE	TRUE	normal
16746492	6.027	NM_001170738	IQSEC3	ENSG00000120645	IQSEC3	0	0	FALSE	TRUE	normal
16994081	5.77375	ENST00000382611	IRX2	ENSG00000170561	IRX2	0	0	FALSE	TRUE	normal
16994054	5.86919	NM_001278632	IRX4	ENSG00000113430	IRX4	0	0	FALSE	TRUE	normal
16802960	5.78023	NM_005545	ISLR	ENSG00000129009	ISLR	0	0	FALSE	TRUE	normal
16923686	5.06028	NR_038311	ITGB2-AS1	ENSG00000227039	ITGB2-AS1	0	0	FALSE	TRUE	normal
16695463	5.19005	NM_017625	ITLN1	ENSG00000179914	ITLN1	0	0	FALSE	TRUE	normal
16671094	4.25124	NM_005547	IVL	ENSG00000163207	IVL	0	0	FALSE	TRUE	normal
16974011	4.27315	NM_001099433	JAKMIP1	ENSG00000152969	JAKMIP1	0	0	FALSE	TRUE	normal
17071460	2.81788	OTTHUMT00000380212	KB-1083B1.1	ENSG00000253740	KB-1083B1.1	0	0	FALSE	FALSE	normal
17071451	4.20199	OTTHUMT00000379896	KB-1615E4.2	ENSG00000253666	KB-1615E4.2	0	0	FALSE	TRUE	normal
17071455	4.95845	OTTHUMT00000379898	KB-1615E4.3	ENSG00000254364	KB-1615E4.3	0	0	FALSE	TRUE	normal
17079622	5.16923	OTTHUMT00000379858	KB-173C10.2	ENSG00000253824	KB-173C10.2	0	0	FALSE	TRUE	normal
16945174	3.41458	NM_207335	KBTBD12	ENSG00000187715	KBTBD12	0	0	FALSE	TRUE	normal
16668753	4.05289	ENST00000419258	KCND3-AS1	ENSG00000237556	KCND3-AS1	0	0	FALSE	TRUE	normal
16904388	4.81782	NM_033272	KCNH7	ENSG00000184611	KCNH7	0	0	FALSE	TRUE	normal
16992217	4.53688	NM_001034837	KCNIP1	ENSG00000182132	KCNIP1	0	0	FALSE	TRUE	normal
16886656	4.43461	ENST00000295101	KCNJ3	ENSG00000162989	KCNJ3	0	0	FALSE	TRUE	normal
16935036	6.20039	NM_152868	KCNJ4	ENSG00000168135	KCNJ4	0	0	FALSE	TRUE	normal
16795567	5.21003	NM_021161	KCNK10	ENSG00000100433	KCNK10	0	0	FALSE	TRUE	normal
17002712	5.42764	NM_004137	KCNMB1	ENSG00000145936	KCNMB1	0	0	FALSE	TRUE	normal
17117126	4.36738	NM_001146705	KDM5D	ENSG00000012817	KDM5D	0	0	FALSE	TRUE	normal
16865349	5.23904	AK024467	KIR3DX1	ENSG00000104970	KIR3DX1	0	0	FALSE	TRUE	normal
16874740	6.85272	NM_144947	KLK11	ENSG00000167757	KLK11	0	0	FALSE	TRUE	normal
16874751	5.03568	NM_145894	KLK12	ENSG00000186474	KLK12	0	0	FALSE	TRUE	normal
16864616	5.72934	NM_001030047	KLK3	ENSG00000142515	KLK3	0	0	FALSE	TRUE	normal
16874683	5.47608	NM_001077491	KLK5	ENSG00000167754	KLK5	0	0	FALSE	TRUE	normal
16761370	2.76003	ENST00000536188	KLRC1	ENSG00000134545	KLRC1	0	0	FALSE	FALSE	normal
16748327	3.05882	NM_001114396	KLRD1	ENSG00000134539	KLRD1	0	0	FALSE	TRUE	normal
17060211	4.67149	NM_001145715	KPNA7	ENSG00000185467	KPNA7	0	0	FALSE	TRUE	normal
16844775	5.82489	NM_002276	KRT19	ENSG00000171345	KRT19	0	0	FALSE	TRUE	normal
16844497	4.33837	NM_019010	KRT20	ENSG00000171431	KRT20	0	0	FALSE	TRUE	normal
16844653	4.98794	NM_002279	KRT33B	ENSG00000131738	KRT33B	0	0	FALSE	TRUE	normal
16844663	3.57149	NM_021013	KRT34	ENSG00000131737	KRT34	0	0	FALSE	TRUE	normal
16765080	5.68095	NM_002272	KRT4	ENSG00000170477	KRT4	0	0	FALSE	TRUE	normal
16764923	4.4794	NM_005554	KRT6A	ENSG00000205420	KRT6A	0	0	FALSE	TRUE	normal
16764894	5.53291	NM_005555	KRT6B	ENSG00000185479	KRT6B	0	0	FALSE	TRUE	normal
16764989	4.45233	NM_001146225	KRT72	ENSG00000170486	KRT72	0	0	FALSE	TRUE	normal
16765005	4.18308	ENST00000546934	KRT73	ENSG00000186049	KRT73	0	0	FALSE	TRUE	normal
16764882	5.44593	NM_004693	KRT75	ENSG00000170454	KRT75	0	0	FALSE	TRUE	normal
16765116	5.61696	NM_173352	KRT78	ENSG00000170423	KRT78	0	0	FALSE	TRUE	normal
16764858	4.80496	NM_033045	KRT84	ENSG00000161849	KRT84	0	0	FALSE	TRUE	normal
16721771	4.60419	NR_027713	KRT8P41	ENSG00000213538	KRT8P41	0	0	FALSE	TRUE	normal
16844793	4.69922	NM_000226	KRT9	ENSG00000171403	KRT9	0	0	FALSE	TRUE	normal
16844572	4.97247	NM_030967	KRTAP1-1	ENSG00000188581	KRTAP1-1	0	0	FALSE	TRUE	normal
16924814	2.84236	NM_181621	KRTAP13-2	ENSG00000182816	KRTAP13-2	0	0	FALSE	FALSE	normal
16844558	4.79897	NM_031957	KRTAP1-5	ENSG00000221852	KRTAP1-5	0	0	FALSE	TRUE	normal
16924862	3.04247	ENST00000333892	KRTAP21-2	ENSG00000187026	KRTAP21-2	0	0	FALSE	TRUE	normal
16924808	5.94186	NM_001077711	KRTAP27-1	ENSG00000206107	KRTAP27-1	0	0	FALSE	TRUE	normal
16734281	6.94634	NM_001005922	KRTAP5-1	ENSG00000205869	KRTAP5-1	0	0	FALSE	TRUE	normal
16665439	4.6342	NM_001164835	L1TD1	ENSG00000240563	L1TD1	0	0	FALSE	TRUE	normal
16911382	5.77366	NM_001199897	LAMP5	ENSG00000125869	LAMP5	0	0	FALSE	TRUE	normal
16671065	3.61213	NM_178354	LCE1F	ENSG00000240386	LCE1F	0	0	FALSE	TRUE	normal
16693335	4.53406	NM_032563	LCE3D	ENSG00000163202	LCE3D	0	0	FALSE	TRUE	normal
17091110	6.10102	NM_001252617	LCN1	ENSG00000160349	LCN1	0	0	FALSE	TRUE	normal
17100109	6.07904	ENST00000406721	LCN10	ENSG00000187922	LCN10	0	0	FALSE	TRUE	normal
16676453	4.41973	NR_038425	LEMD1-AS1	ENSG00000226235	LEMD1-AS1	0	0	FALSE	TRUE	normal
17051152	5.149	NM_000230	LEP	ENSG00000174697	LEP	0	0	FALSE	TRUE	normal
16754134	3.88928	NM_001277226	LGR5	ENSG00000139292	LGR5	0	0	FALSE	TRUE	normal
16675975	5.67966	NM_001017403	LGR6	ENSG00000133067	LGR6	0	0	FALSE	TRUE	normal
16865424	5.29301	uc002qgp.3	LILRB4	ENSG00000186818	LILRB4	0	0	FALSE	TRUE	normal
16875387	5.62956	AK090399	LILRB5	ENSG00000105609	LILRB5	0	0	FALSE	TRUE	normal
16921937	3.64028	NR_026552	LINC00161	ENSG00000226935	LINC00161	0	0	FALSE	TRUE	normal
16921999	3.5977	ENST00000420364	LINC00189	ENSG00000215533	LINC00189	0	0	FALSE	TRUE	normal
17025965	4.54467	NR_026781	LINC00242	ENSG00000229214	LINC00242	0	0	FALSE	TRUE	normal
17115966	6.47708	NR_046502	LINC00278	ENSG00000231535	LINC00278	0	0	FALSE	TRUE	normal
16821919	5.7728	NR_024347	LINC00304	ENSG00000180422	LINC00304	0	0	FALSE	TRUE	normal
16821581	4.39911	BC030801	LINC00311	ENSG00000179219	LINC00311	0	0	FALSE	TRUE	normal
16923738	5.10788	ENST00000328344	LINC00334	ENSG00000182586	LINC00334	0	0	FALSE	TRUE	normal
16772898	6.08778	NR_034026	LINC00421	ENSG00000236834	LINC00421	0	0	FALSE	TRUE	normal
16777363	5.18174	ENST00000413124	LINC00424	ENSG00000226722	LINC00424	0	0	FALSE	TRUE	normal
16778553	2.54059	ENST00000415620	LINC00428	ENSG00000229546	LINC00428	0	0	FALSE	FALSE	normal
16772875	4.41129	NR_026852	LINC00442	ENSG00000232685	LINC00442	0	0	FALSE	TRUE	normal
16762332	3.16825	NR_029451	LINC00477	ENSG00000197503	LINC00477	0	0	FALSE	TRUE	normal
16979938	4.63283	ENST00000504369	LINC00498	ENSG00000248397	LINC00498	0	0	FALSE	TRUE	normal
16948158	4.99791	NR_047465	LINC00501	ENSG00000203645	LINC00501	0	0	FALSE	TRUE	normal
16759075	3.78843	NR_046392	LINC00507	ENSG00000256193	LINC00507	0	0	FALSE	TRUE	normal
17080364	5.18905	NR_046215	LINC00536	ENSG00000249917	LINC00536	0	0	FALSE	TRUE	normal
16877157	4.29209	NR_047499	LINC00570	ENSG00000224177	LINC00570	0	0	FALSE	TRUE	normal
17107392	3.82226	NR_028345	LINC00632	ENSG00000203930	LINC00632	0	0	FALSE	TRUE	normal
16845278	5.76095	NR_027254	LINC00671	ENSG00000213373	LINC00671	0	0	FALSE	TRUE	normal
16736855	3.2208	NR_102708	LINC00678	ENSG00000254934	LINC00678	0	0	FALSE	TRUE	normal
17054190	4.49689	NR_024394	LINC00689	ENSG00000231419	LINC00689	0	0	FALSE	TRUE	normal
16701947	4.50321	NR_108054	LINC00703	ENSG00000224382	LINC00703	0	0	FALSE	TRUE	normal
16711553	4.52538	NR_108074	LINC00706	ENSG00000281186	LINC00706	0	0	FALSE	TRUE	normal
16713224	5.29299	NR_038932	LINC00838	ENSG00000261683	LINC00838	0	0	FALSE	TRUE	normal
17080991	4.4564	NR_038446	LINC00861	ENSG00000245164	LINC00861	0	0	FALSE	TRUE	normal
16707260	2.58404	NR_038382	LINC00865	ENSG00000232229	LINC00865	0	0	FALSE	FALSE	normal
16826494	2.81493	NR_038233	LINC00919	ENSG00000260268	LINC00919	0	0	FALSE	FALSE	normal
16772240	4.79926	NR_034132	LINC00939	ENSG00000249267	LINC00939	0	0	FALSE	TRUE	normal
16759030	5.23653	NR_038256	LINC00943	ENSG00000189238	LINC00943	0	0	FALSE	TRUE	normal
16696132	4.7239	NR_104091	LINC00970	ENSG00000203601	LINC00970	0	0	FALSE	TRUE	normal
16955795	4.41229	NR_033978	LINC00994	ENSG00000189196	LINC00994	0	0	FALSE	TRUE	normal
16780153	3.39288	ENST00000415193	LINC01047	ENSG00000232225	LINC01047	0	0	FALSE	TRUE	normal
16775765	4.08683	NR_120414	LINC01049	ENSG00000234384	LINC01049	0	0	FALSE	TRUE	normal
16777854	4.84804	ENST00000420694	LINC01058	ENSG00000225039	LINC01058	0	0	FALSE	TRUE	normal
16779978	3.25213	NR_108076	LINC01069	ENSG00000236133	LINC01069	0	0	FALSE	TRUE	normal
16682807	5.64434	NR_033887	LINC01141	ENSG00000236963	LINC01141	0	0	FALSE	TRUE	normal
16881189	6.76309	ENST00000449073	LINC01143	ENSG00000237751	LINC01143	0	0	FALSE	TRUE	normal
16787213	4.93665	ENST00000557355	LINC01146	ENSG00000258867	LINC01146	0	0	FALSE	TRUE	normal
16901347	6.15048	NR_110373	LINC01159	ENSG00000229743	LINC01159	0	0	FALSE	TRUE	normal
16710588	4.49388	NR_120619	LINC01163	ENSG00000280953	LINC01163	0	0	FALSE	TRUE	normal
16719692	5.7982	XR_242765	LINC01165	ENSG00000229081	LINC01165	0	0	FALSE	TRUE	normal
16884821	4.82765	NR_034128	LINC01191	ENSG00000234199	LINC01191	0	0	FALSE	TRUE	normal
16943749	3.82051	NR_109841	LINC01205	ENSG00000228980	LINC01205	0	0	FALSE	TRUE	normal
16948465	4.65228	NR_104146	LINC01206	ENSG00000242512	LINC01206	0	0	FALSE	TRUE	normal
16748396	5.03137	NR_033890	LINC01252	ENSG00000247157	LINC01252	0	0	FALSE	TRUE	normal
16936803	2.54891	NR_110118	LINC01266	ENSG00000224957	LINC01266	0	0	FALSE	FALSE	normal
16908192	5.26103	NR_110392	LINC01280	ENSG00000224391	LINC01280	0	0	FALSE	TRUE	normal
16931545	6.1728	NR_038944	LINC01310	ENSG00000205632	LINC01310	0	0	FALSE	TRUE	normal
16997773	3.37881	NR_105016	LINC01338	ENSG00000281327	LINC01338	0	0	FALSE	TRUE	normal
16987601	3.44877	NR_105028	LINC01340	ENSG00000250331	LINC01340	0	0	FALSE	TRUE	normal
17126284	5.95651	NR_027454	LINC01348	ENSG00000280587	LINC01348	0	0	FALSE	TRUE	normal
16688850	3.89676	NR_110632	LINC01361	ENSG00000236268	LINC01361	0	0	FALSE	TRUE	normal
16746095	4.72865	NR_120582	LINC01395	ENSG00000281097	LINC01395	0	0	FALSE	TRUE	normal
16757051	5.52119	ENST00000547607	LINC01405	ENSG00000185847	LINC01405	0	0	FALSE	TRUE	normal
16911125	5.82893	NR_033917	LINC01433	ENSG00000230176	LINC01433	0	0	FALSE	TRUE	normal
17056976	4.20028	NR_110831	LINC01450	ENSG00000232458	LINC01450	0	0	FALSE	TRUE	normal
16866937	5.56054	NM_001101391	LINGO3	ENSG00000220008	LINGO3	0	0	FALSE	TRUE	normal
16762413	3.45926	NM_001145728	LMNTD1	ENSG00000152936	LMNTD1	0	0	FALSE	TRUE	normal
16761938	4.65799	NM_001001395	LMO3	ENSG00000048540	LMO3	0	0	FALSE	TRUE	normal
16854954	5.62156	NM_144612	LOXHD1	ENSG00000167210	LOXHD1	0	0	FALSE	TRUE	normal
16783739	3.97276	NM_152447	LRFN5	ENSG00000165379	LRFN5	0	0	FALSE	TRUE	normal
16982508	6.59961	NM_001080478	LRRC14B	ENSG00000185028	LRRC14B	0	0	FALSE	TRUE	normal
16681940	5.01497	NM_001010847	LRRC38	ENSG00000162494	LRRC38	0	0	FALSE	TRUE	normal
16673241	4.64949	NM_001005214	LRRC52	ENSG00000162763	LRRC52	0	0	FALSE	TRUE	normal
17053316	5.98873	NM_001142928	LRRC61	ENSG00000127399	LRRC61	0	0	FALSE	TRUE	normal
17059647	2.77819	NM_001161528	LRRD1	ENSG00000240720	LRRD1	0	0	FALSE	FALSE	normal
16722987	3.74153	NM_001009909	LUZP2	ENSG00000187398	LUZP2	0	0	FALSE	TRUE	normal
17073220	5.36168	ENST00000522591	LY6K	ENSG00000160886	LY6K	0	0	FALSE	TRUE	normal
17081951	5.88131	NM_205545	LYPD2	ENSG00000197353	LYPD2	0	0	FALSE	TRUE	normal
16868027	4.90422	NR_033250	LYPLA2P2	ENSG00000269153	LYPLA2P2	0	0	FALSE	TRUE	normal
17114916	5.63493	ENST00000427671	MAGEA8-AS1	ENSG00000230899	MAGEA8-AS1	0	0	FALSE	TRUE	normal
17102279	4.55564	NM_173699	MAGEB18	ENSG00000176774	MAGEB18	0	0	FALSE	TRUE	normal
16845971	2.53741	NR_024559	MAPT-AS1	ENSG00000264589	MAPT-AS1	0	0	FALSE	FALSE	normal
16994565	5.58907	NM_001102562	MARCHF11	ENSG00000183654	MARCH11	0	0	FALSE	TRUE	normal
17014361	5.27266	NM_002377	MAS1	ENSG00000130368	MAS1	0	0	FALSE	TRUE	normal
16867153	6.54101	NM_002378	MATK	ENSG00000007264	MATK	0	0	FALSE	TRUE	normal
16791167	6.35985	NM_001199821	MDP1	ENSG00000213920	MDP1	0	0	FALSE	TRUE	normal
16885509	6.58486	NR_033903	MED15P9	ENSG00000223760	MED15P9	0	0	FALSE	TRUE	normal
16773681	4.5287	NM_032849	MEDAG	ENSG00000102802	MEDAG	0	0	FALSE	TRUE	normal
16898447	4.97288	NR_046438	MEIS1-AS3	ENSG00000226819	MEIS1-AS3	0	0	FALSE	TRUE	normal
16845427	6.59444	ENST00000318579	MEOX1	ENSG00000005102	MEOX1	0	0	FALSE	TRUE	normal
17055447	4.53754	NM_005924	MEOX2	ENSG00000106511	MEOX2	0	0	FALSE	TRUE	normal
16760953	5.02903	NM_003480	MFAP5	ENSG00000197614	MFAP5	0	0	FALSE	TRUE	normal
16979985	5.31325	NM_032623	MGARP	ENSG00000137463	MGARP	0	0	FALSE	TRUE	normal
16710608	5.45875	NM_002412	MGMT	ENSG00000170430	MGMT	0	0	FALSE	TRUE	normal
16865957	2.23162	NR_024059	MIMT1	ENSG00000268654	MIMT1	0	0	FALSE	FALSE	normal
16931716	5.76436	NM_017584	MIOX	ENSG00000100253	MIOX	0	0	FALSE	TRUE	normal
16688212	5.13804	NR_029516	MIR101-1	ENSG00000199135	MIR101-1	0	0	FALSE	TRUE	normal
17002610	3.14979	NR_029520	MIR103A1	ENSG00000199035	MIR103A1	0	0	FALSE	TRUE	normal
17115037	4.41941	NR_029522	MIR105-2	ENSG00000207818	MIR105-2	0	0	FALSE	TRUE	normal
16745501	4.14173	NR_029671	MIR125B1	ENSG00000207971	MIR125B1	0	0	FALSE	TRUE	normal
16921646	3.94232	NR_029694	MIR125B2	ENSG00000207863	MIR125B2	0	0	FALSE	TRUE	normal
16992807	4.35647	NR_031569	MIR1271	ENSG00000221464	MIR1271	0	0	FALSE	TRUE	normal
16932473	5.95343	NR_031618	MIR1286	ENSG00000221039	MIR1286	0	0	FALSE	TRUE	normal
16831427	3.84609	NR_031698	MIR1288	ENSG00000221355	MIR1288	0	0	FALSE	TRUE	normal
16682485	7.27163	NR_031622	MIR1290	ENSG00000221662	MIR1290	0	0	FALSE	TRUE	normal
17096338	1.86464	NR_031637	MIR1302-8	ENSG00000221269	MIR1302-8	0	0	FALSE	FALSE	normal
16820653	3.29412	NR_029681	MIR140	ENSG00000208017	MIR140	0	0	FALSE	TRUE	normal
16697662	2.89071	NR_029626	MIR181A1	ENSG00000207759	MIR181A1	0	0	FALSE	FALSE	normal
16697660	5.77943	NR_029612	MIR181B1	ENSG00000207975	MIR181B1	0	0	FALSE	TRUE	normal
16979112	2.27696	NR_029835	MIR302A	ENSG00000207927	MIR302A	0	0	FALSE	FALSE	normal
16908832	6.13083	NR_036082	MIR3132	ENSG00000265252	MIR3132	0	0	FALSE	TRUE	normal
17071620	5.47325	NR_036106	MIR3151	ENSG00000265657	MIR3151	0	0	FALSE	TRUE	normal
17119286	6.8618	NR_036162	MIR3194	ENSG00000266761	MIR3194	0	0	FALSE	TRUE	normal
16929049	3.94818	NR_036171	MIR3200	ENSG00000264661	AL022336.1	0	0	FALSE	TRUE	normal
16788727	2.89954	NR_029968	MIR329-2	ENSG00000207762	MIR329-2	0	0	FALSE	FALSE	normal
16788404	6.4272	NR_029906	MIR345	ENSG00000198984	MIR345	0	0	FALSE	TRUE	normal
17103746	5.26933	NR_029850	MIR362	ENSG00000208015	MIR362	0	0	FALSE	TRUE	normal
16979108	1.82803	NR_029860	MIR367	ENSG00000199169	MIR367	0	0	FALSE	FALSE	normal
17099701	6.67886	NR_039694	MIR3689D2	ENSG00000264136	MIR3689D2	0	0	FALSE	TRUE	normal
17099703	5.35668	NR_039695	MIR3689E	ENSG00000266827	MIR3689E	0	0	FALSE	TRUE	normal
17112189	2.25778	NR_030620	MIR374B	ENSG00000212027	MIR374B	0	0	FALSE	FALSE	normal
16929560	4.21966	NR_037471	MIR3909	ENSG00000266320	MIR3909	0	0	FALSE	TRUE	normal
17018652	5.47955	NR_037491	MIR3925	ENSG00000263894	MIR3925	0	0	FALSE	TRUE	normal
16684579	6.1125	NR_036216	MIR4254	ENSG00000266580	MIR4254	0	0	FALSE	TRUE	normal
16782958	3.31382	NR_036193	MIR4307	ENSG00000265165	MIR4307	0	0	FALSE	TRUE	normal
16849339	7.13032	NR_036200	MIR4316	ENSG00000264060	MIR4316	0	0	FALSE	TRUE	normal
16664579	4.27467	NR_039617	MIR4421	ENSG00000265538	MIR4421	0	0	FALSE	TRUE	normal
16666723	2.68122	NR_039619	MIR4423	ENSG00000266110	MIR4423	0	0	FALSE	FALSE	normal
16909154	1.98871	NR_039641	MIR4439	ENSG00000263828	MIR4439	0	0	FALSE	FALSE	normal
17114318	2.06635	NR_030587	MIR450B	ENSG00000216001	MIR450B	0	0	FALSE	FALSE	normal
16840415	2.68607	NR_039745	MIR4520-1	ENSG00000264468	MIR4520-1	0	0	FALSE	FALSE	normal
16842515	7.15779	NR_039748	MIR4522	ENSG00000263583	MIR4522	0	0	FALSE	TRUE	normal
16852267	2.77445	NR_039753	MIR4527	ENSG00000266582	MIR4527	0	0	FALSE	FALSE	normal
16993908	6.07727	NR_039778	MIR4635	ENSG00000263834	MIR4635	0	0	FALSE	TRUE	normal
17082258	3.83985	NR_039810	MIR4664	ENSG00000265660	MIR4664	0	0	FALSE	TRUE	normal
16833024	5.74918	NR_039878	MIR4725	ENSG00000265976	MIR4725	0	0	FALSE	TRUE	normal
16858310	6.67937	NR_039903	MIR4748	ENSG00000265879	MIR4748	0	0	FALSE	TRUE	normal
16892114	1.89033	NR_039937	MIR4777	ENSG00000263641	MIR4777	0	0	FALSE	FALSE	normal
16948132	3.09671	NR_039952	MIR4789	ENSG00000264974	MIR4789	0	0	FALSE	TRUE	normal
16957673	3.03648	NR_039959	MIR4796	ENSG00000264623	AC078986.1	0	0	FALSE	TRUE	normal
17103744	6.89327	NR_030224	MIR500A	ENSG00000207785	MIR500A	0	0	FALSE	TRUE	normal
17103750	6.26473	NR_036257	MIR500B	ENSG00000239057	MIR500B	0	0	FALSE	TRUE	normal
16680836	5.03152	NR_030277	MIR551A	ENSG00000207776	MIR551A	0	0	FALSE	TRUE	normal
16947780	7.2836	NR_030294	MIR551B	ENSG00000207717	MIR551B	0	0	FALSE	TRUE	normal
16673034	1.74669	NR_030283	MIR556	ENSG00000207729	MIR556	0	0	FALSE	FALSE	normal
17065630	5.28331	NR_030327	MIR597	ENSG00000207701	MIR597	0	0	FALSE	TRUE	normal
17079523	3.98031	NR_030329	MIR599	ENSG00000207804	MIR599	0	0	FALSE	TRUE	normal
17106198	3.32448	NR_030381	MIR652	ENSG00000208013	MIR652	0	0	FALSE	TRUE	normal
16723939	4.20258	XR_247629	MIR670HG	ENSG00000235661	MIR670HG	0	0	FALSE	TRUE	normal
16742742	2.87687	NR_030598	MIR708	ENSG00000211997	MIR708	0	0	FALSE	FALSE	normal
16857248	5.62711	NR_027148	MIR7-3HG	ENSG00000176840	MIR7-3HG	0	0	FALSE	TRUE	normal
16863391	5.72432	NR_030412	MIR769	ENSG00000211580	MIR769	0	0	FALSE	TRUE	normal
17093074	2.74849	NR_030597	MIR876	ENSG00000215966	MIR876	0	0	FALSE	FALSE	normal
16749227	6.21753	NR_030625	MIR920	ENSG00000216192	MIR920	0	0	FALSE	TRUE	normal
16921644	3.15384	ENST00000362160	MIRLET7C	ENSG00000199030	MIRLET7C	0	0	FALSE	TRUE	normal
17111364	2.04564	NR_029484	MIRLET7F2	ENSG00000208012	MIRLET7F2	0	0	FALSE	FALSE	normal
16954759	4.68438	NR_029660	MIRLET7G	ENSG00000199150	MIRLET7G	0	0	FALSE	TRUE	normal
16856249	6.03593	NM_173481	MISP	ENSG00000099812	MISP	0	0	FALSE	TRUE	normal
16712773	4.53897	NM_001242702	MKX	ENSG00000150051	MKX	0	0	FALSE	TRUE	normal
16936306	5.90986	NM_015166	MLC1	ENSG00000100427	MLC1	0	0	FALSE	TRUE	normal
16743707	3.3094	NM_002425	MMP10	ENSG00000166670	MMP10	0	0	FALSE	TRUE	normal
16931598	4.38932	NM_001164105	MOV10L1	ENSG00000073146	MOV10L1	0	0	FALSE	TRUE	normal
17063738	4.16646	NR_024346	MOXD2P	ENSG00000240268	MOXD2P	0	0	FALSE	TRUE	normal
16720997	6.16201	NR_027138	MRGPRG-AS1	ENSG00000236301	MRGPRG-AS1	0	0	FALSE	TRUE	normal
16995721	4.18051	NM_173489	MROH2B	ENSG00000171495	MROH2B	0	0	FALSE	TRUE	normal
17081857	6.65244	NM_207414	MROH5	ENSG00000226807	MROH5	0	0	FALSE	TRUE	normal
17113860	5.29162	ENST00000435941	MRRFP1	ENSG00000224236	MRRFP1	0	0	FALSE	TRUE	normal
16738819	4.33355	NM_001247999	MS4A6A	ENSG00000110077	MS4A6A	0	0	FALSE	TRUE	normal
16725201	2.40021	NM_139249	MS4A6E	ENSG00000166926	MS4A6E	0	0	FALSE	FALSE	normal
16906471	3.78177	NM_005259	MSTN	ENSG00000138379	MSTN	0	0	FALSE	TRUE	normal
17009908	2.6991	NM_001190706	MTRNR2L9	ENSG00000255633	MTRNR2L9	0	0	FALSE	FALSE	normal
17049627	5.72987	ENST00000379442	MUC12	ENSG00000205277	MUC12	0	0	FALSE	TRUE	normal
16868265	5.62941	NM_024690	MUC16	ENSG00000181143	MUC16	0	0	FALSE	TRUE	normal
16850041	6.37834	NM_001145113	MYADML2	ENSG00000185105	MYADML2	0	0	FALSE	TRUE	normal
16698174	6.41524	NM_004997	MYBPH	ENSG00000133055	MYBPH	0	0	FALSE	TRUE	normal
16877413	6.31179	NM_001293228	MYCN	ENSG00000134323	MYCN	0	0	FALSE	TRUE	normal
16894680	4.52766	NR_026766	MYCNOS	ENSG00000233718	MYCNOS	0	0	FALSE	TRUE	normal
16790832	4.75487	NM_002471	MYH6	ENSG00000197616	MYH6	0	0	FALSE	TRUE	normal
16770165	5.96616	NM_000432	MYL2	ENSG00000111245	MYL2	0	0	FALSE	TRUE	normal
17123290	4.80955	ENST00000509077	MYLKP1	ENSG00000228868	MYLKP1	0	0	FALSE	TRUE	normal
16780906	3.08452	ENST00000412809	MYO16-AS2	ENSG00000229938	MYO16-AS2	0	0	FALSE	TRUE	normal
16893884	5.42138	NM_015025	MYT1L	ENSG00000186487	MYT1L	0	0	FALSE	TRUE	normal
16961675	1.96959	NR_046713	NAALADL2-AS2	ENSG00000226779	NAALADL2-AS2	0	0	FALSE	FALSE	normal
16747865	4.55974	AY455283	NANOGP1	ENSG00000176654	NANOGP1	0	0	FALSE	TRUE	normal
17112137	4.12494	NM_021963	NAP1L2	ENSG00000186462	NAP1L2	0	0	FALSE	TRUE	normal
16736665	4.57938	NR_033989	NAV2-AS4	ENSG00000254622	NAV2-AS4	0	0	FALSE	TRUE	normal
16736658	4.35666	NR_049725	NAV2-AS5	ENSG00000255043	NAV2-AS5	0	0	FALSE	TRUE	normal
17123016	8.50903	ENST00000420638	NBEAP3	ENSG00000223875	NBEAP3	0	0	FALSE	TRUE	normal
16929662	5.78728	NM_000631	NCF4	ENSG00000100365	NCF4	0	0	FALSE	TRUE	normal
16844185	5.50396	NM_006160	NEUROD2	ENSG00000171532	NEUROD2	0	0	FALSE	TRUE	normal
16795075	6.38733	NM_021257	NGB	ENSG00000165553	NGB	0	0	FALSE	TRUE	normal
17104832	5.85199	NM_001013627	NHSL2	ENSG00000204131	NHSL2	0	0	FALSE	TRUE	normal
16874828	6.64257	NM_005601	NKG7	ENSG00000105374	NKG7	0	0	FALSE	TRUE	normal
16792144	6.43918	NM_014360	NKX2-8	ENSG00000136327	NKX2-8	0	0	FALSE	TRUE	normal
16875836	5.03349	NM_176810	NLRP13	ENSG00000173572	NLRP13	0	0	FALSE	TRUE	normal
16721549	3.55306	NM_176822	NLRP14	ENSG00000158077	NLRP14	0	0	FALSE	TRUE	normal
16865789	4.85921	NM_134444	NLRP4	ENSG00000160505	NLRP4	0	0	FALSE	TRUE	normal
16865818	4.96478	NM_153447	NLRP5	ENSG00000171487	NLRP5	0	0	FALSE	TRUE	normal
16875530	5.84558	NM_001127255	NLRP7	ENSG00000167634	NLRP7	0	0	FALSE	TRUE	normal
16909532	6.39177	NM_006056	NMUR1	ENSG00000171596	NMUR1	0	0	FALSE	TRUE	normal
17001976	4.78791	NM_020167	NMUR2	ENSG00000132911	NMUR2	0	0	FALSE	TRUE	normal
16832221	5.67067	ENST00000458685	NOS2P3	ENSG00000230528	NOS2P3	0	0	FALSE	TRUE	normal
16871495	5.41808	NM_004646	NPHS1	ENSG00000161270	NPHS1	0	0	FALSE	TRUE	normal
16821033	5.77652	ENST00000429990	NPIPB15	ENSG00000196436	NPIPB15	0	0	FALSE	TRUE	normal
16681806	5.99202	NM_002521	NPPB	ENSG00000120937	NPPB	0	0	FALSE	TRUE	normal
17056564	3.43687	NR_015356	NPSR1-AS1	ENSG00000197085	NPSR1-AS1	0	0	FALSE	TRUE	normal
16683903	5.19083	NM_021969	NR0B2	ENSG00000131910	NR0B2	0	0	FALSE	TRUE	normal
17067729	4.17455	NR_104156	NRG1-IT1	ENSG00000253974	NRG1-IT1	0	0	FALSE	TRUE	normal
17005326	4.07129	NM_080723	NRSN1	ENSG00000152954	NRSN1	0	0	FALSE	TRUE	normal
16733597	6.24956	NR_046820	NTM-IT	ENSG00000238262	NTM-IT	0	0	FALSE	TRUE	normal
16874023	5.57786	NM_145807	NTN5	ENSG00000142233	NTN5	0	0	FALSE	TRUE	normal
16672186	5.22689	NM_001007792	NTRK1	ENSG00000198400	NTRK1	0	0	FALSE	TRUE	normal
17113129	4.97227	NM_017681	NUP62CL	ENSG00000198088	NUP62CL	0	0	FALSE	TRUE	normal
16870217	6.51469	NM_138454	NXNL1	ENSG00000171773	NXNL1	0	0	FALSE	TRUE	normal
16731515	3.39178	NM_182495	NXPE2	ENSG00000204361	NXPE2	0	0	FALSE	TRUE	normal
17102781	6.39878	ENST00000342595	NYX	ENSG00000188937	NYX	0	0	FALSE	TRUE	normal
16676172	5.72109	NM_014359	OPTC	ENSG00000188770	OPTC	0	0	FALSE	TRUE	normal
16721529	4.05056	NM_207186	OR10A4	ENSG00000170782	OR10A4	0	0	FALSE	TRUE	normal
16701593	3.22649	NM_012353	OR1C1	ENSG00000221888	OR1C1	0	0	FALSE	TRUE	normal
16815409	4.81067	NR_002169	OR1F2P	ENSG00000203581	OR1F2P	0	0	FALSE	TRUE	normal
17125152	4.31804	ENST00000448731	OR1H1P	ENSG00000228914	OR1H1P	0	0	FALSE	TRUE	normal
17098118	4.98656	NM_012363	OR1N1	ENSG00000171505	OR1N1	0	0	FALSE	TRUE	normal
17088809	2.31456	BC140713	OR1Q1	ENSG00000165202	OR1Q1	0	0	FALSE	FALSE	normal
17052914	4.47906	ENST00000408899	OR2A14	ENSG00000221938	OR2A14	0	0	FALSE	TRUE	normal
17052910	5.02872	ENST00000408979	OR2A2	ENSG00000221989	OR2A2	0	0	FALSE	TRUE	normal
17016518	3.85129	NM_033057	OR2B2	ENSG00000168131	OR2B2	0	0	FALSE	TRUE	normal
17005884	3.31373	NM_012367	OR2B6	ENSG00000124657	OR2B6	0	0	FALSE	TRUE	normal
16679731	5.15345	NM_001001915	OR2G2	ENSG00000177489	OR2G2	0	0	FALSE	TRUE	normal
16679733	4.48007	NM_001001914	OR2G3	ENSG00000177476	OR2G3	0	0	FALSE	TRUE	normal
16679785	4.56557	NR_002141	OR2M1P	ENSG00000177233	OR2M1P	0	0	FALSE	TRUE	normal
16679789	2.56462	NM_001004688	OR2M2	ENSG00000198601	OR2M2	0	0	FALSE	FALSE	normal
16679795	4.84332	NM_017504	OR2M4	ENSG00000171180	OR2M4	0	0	FALSE	TRUE	normal
16679787	5.72702	NM_001004690	OR2M5	ENSG00000162727	OR2M5	0	0	FALSE	TRUE	normal
16701603	1.85381	BC136994	OR2T33	ENSG00000177212	OR2T33	0	0	FALSE	FALSE	normal
16724722	3.40333	BC140748	OR4A16	ENSG00000181961	OR4A16	0	0	FALSE	TRUE	normal
16721247	4.98167	NM_001005162	OR52B6	ENSG00000187747	OR52B6	0	0	FALSE	TRUE	normal
16721313	3.74714	NM_001005165	OR52E4	ENSG00000180974	OR52E4	0	0	FALSE	TRUE	normal
16734958	3.39916	NM_001005167	OR52E6	ENSG00000205409	OR52E6	0	0	FALSE	TRUE	normal
16734961	2.33653	NM_001005168	OR52E8	ENSG00000183269	OR52E8	0	0	FALSE	FALSE	normal
16721310	4.90415	NM_001005174	OR52N2	ENSG00000180988	OR52N2	0	0	FALSE	TRUE	normal
16734975	4.12339	NM_001001917	OR56A1	ENSG00000180934	OR56A1	0	0	FALSE	TRUE	normal
16721320	3.56079	NM_001003443	OR56A3	ENSG00000184478	OR56A3	0	0	FALSE	TRUE	normal
16734971	3.71779	NM_001005179	OR56A4	ENSG00000183389	OR56A4	0	0	FALSE	TRUE	normal
16734965	5.10736	NM_001146033	OR56A5	ENSG00000188691	OR56A5	0	0	FALSE	TRUE	normal
16738615	2.61848	NM_001005566	OR5B2	ENSG00000172365	OR5B2	0	0	FALSE	FALSE	normal
16738628	5.72648	NM_001005218	OR5B21	ENSG00000198283	OR5B21	0	0	FALSE	TRUE	normal
16735317	2.64257	ENST00000329434	OR5P2	ENSG00000183303	OR5P2	0	0	FALSE	FALSE	normal
16910111	3.93464	BC137561	OR6B2	ENSG00000182083	OR6B2	0	0	FALSE	TRUE	normal
16745612	2.63699	NM_001005188	OR6X1	ENSG00000221931	OR6X1	0	0	FALSE	FALSE	normal
16738357	4.70785	NR_027688	OR7E5P	ENSG00000214880	OR7E5P	0	0	FALSE	TRUE	normal
17052509	2.55245	ENST00000548136	OR9A4	ENSG00000258083	OR9A4	0	0	FALSE	FALSE	normal
16740541	5.09404	NR_108085	OVOL1-AS1	ENSG00000255120	OVOL1-AS1	0	0	FALSE	TRUE	normal
16960573	4.29716	NM_176894	P2RY13	ENSG00000181631	P2RY13	0	0	FALSE	TRUE	normal
17111804	5.26262	NM_002565	P2RY4	ENSG00000186912	P2RY4	0	0	FALSE	TRUE	normal
16728788	6.05138	NM_001277204	P2RY6	ENSG00000171631	P2RY6	0	0	FALSE	TRUE	normal
16988980	3.0735	NR_047470	P4HA2-AS1	ENSG00000237714	P4HA2-AS1	0	0	FALSE	TRUE	normal
16660081	5.49488	NM_207421	PADI6	ENSG00000276747	PADI6	0	0	FALSE	TRUE	normal
17111549	4.17464	NR_033460	PAGE3	ENSG00000204279	PAGE3	0	0	FALSE	TRUE	normal
16737344	4.60794	NM_001001991	PAMR1	ENSG00000149090	PAMR1	0	0	FALSE	TRUE	normal
16911995	6.67746	NM_001257096	PAX1	ENSG00000125813	PAX1	0	0	FALSE	TRUE	normal
17093973	5.91357	NM_001280547	PAX5	ENSG00000196092	PAX5	0	0	FALSE	TRUE	normal
16660182	5.7605	NM_001135254	PAX7	ENSG00000009709	PAX7	0	0	FALSE	TRUE	normal
16714433	4.32186	NM_001142763	PCDH15	ENSG00000150275	PCDH15	0	0	FALSE	TRUE	normal
16779595	4.45522	NM_022843	PCDH20	ENSG00000280165	PCDH20	0	0	FALSE	TRUE	normal
16910536	6.14824	NM_005018	PDCD1	ENSG00000188389	PDCD1	0	0	FALSE	TRUE	normal
16732271	5.93102	NM_001168468	PDZD3	ENSG00000172367	PDZD3	0	0	FALSE	TRUE	normal
17075405	5.11554	NM_144962	PEBP4	ENSG00000134020	PEBP4	0	0	FALSE	TRUE	normal
16875909	5.4604	NM_001146184	PEG3	ENSG00000198300	PEG3	0	0	FALSE	TRUE	normal
17077359	5.69447	NM_001135690	PENK	ENSG00000181195	PENK	0	0	FALSE	TRUE	normal
16948348	2.9294	ENST00000466064	PEX5L-AS1	ENSG00000243799	PEX5L-AS1	0	0	FALSE	FALSE	normal
17019103	5.19384	NM_001166424	PGC	ENSG00000096088	PGC	0	0	FALSE	TRUE	normal
16873501	5.34333	NM_005091	PGLYRP1	ENSG00000008438	PGLYRP1	0	0	FALSE	TRUE	normal
17109765	4.10918	NR_046639	PHEX-AS1	ENSG00000224204	PHEX-AS1	0	0	FALSE	TRUE	normal
16846389	6.65684	NM_001143804	PHOSPHO1	ENSG00000173868	PHOSPHO1	0	0	FALSE	TRUE	normal
16914171	5.85519	NM_002638	PI3	ENSG00000124102	PI3	0	0	FALSE	TRUE	normal
16759159	4.38005	NM_001190971	PIWIL1	ENSG00000125207	PIWIL1	0	0	FALSE	TRUE	normal
16771279	4.99094	NM_000928	PLA2G1B	ENSG00000170890	PLA2G1B	0	0	FALSE	TRUE	normal
16682792	5.36082	NM_001105572	PLA2G2C	ENSG00000187980	PLA2G2C	0	0	FALSE	TRUE	normal
16682785	5.42425	NM_001271814	PLA2G2D	ENSG00000117215	PLA2G2D	0	0	FALSE	TRUE	normal
17019728	4.9236	NM_001168357	PLA2G7	ENSG00000146070	PLA2G7	0	0	FALSE	TRUE	normal
16701119	5.14952	NM_001195811	PLD5	ENSG00000180287	PLD5	0	0	FALSE	TRUE	normal
16867334	7.15365	NM_001013706	PLIN5	ENSG00000214456	PLIN5	0	0	FALSE	TRUE	normal
16856613	6.01995	NM_001243079	PLK5	ENSG00000185988	PLK5	0	0	FALSE	TRUE	normal
16985844	3.73251	NR_003922	PMCHL2	ENSG00000169040	PMCHL2	0	0	FALSE	TRUE	normal
16709629	5.52357	NM_000936	PNLIP	ENSG00000175535	PNLIP	0	0	FALSE	TRUE	normal
17112498	2.89247	NM_024921	POF1B	ENSG00000124429	POF1B	0	0	FALSE	FALSE	normal
16895337	4.32249	NM_001035256	POMC	ENSG00000115138	POMC	0	0	FALSE	TRUE	normal
16885596	4.90743	NM_001277083	POTEJ	ENSG00000222038	POTEJ	0	0	FALSE	TRUE	normal
17105126	3.9004	NM_000307	POU3F4	ENSG00000196767	POU3F4	0	0	FALSE	TRUE	normal
16976821	3.24608	NM_002704	PPBP	ENSG00000163736	PPBP	0	0	FALSE	TRUE	normal
16974049	5.44773	NM_001206995	PPP2R2C	ENSG00000074211	PPP2R2C	0	0	FALSE	TRUE	normal
16846301	4.25983	NM_032391	PRAC1	ENSG00000159182	PRAC1	0	0	FALSE	TRUE	normal
16659371	2.92899	NM_001294139	PRAMEF1	ENSG00000116721	PRAMEF1	0	0	FALSE	FALSE	normal
16681856	4.11231	NM_001009611	PRAMEF4	ENSG00000243073	PRAMEF4	0	0	FALSE	TRUE	normal
16761559	6.75155	ENST00000545829	PRB2	ENSG00000121335	PRB2	0	0	FALSE	TRUE	normal
17078048	5.50734	NM_024504	PRDM14	ENSG00000147596	PRDM14	0	0	FALSE	TRUE	normal
16911139	6.04463	NM_012409	PRND	ENSG00000171864	PRND	0	0	FALSE	TRUE	normal
16916971	6.0321	AK289995	PROKR2	ENSG00000101292	PROKR2	0	0	FALSE	TRUE	normal
17090103	6.16141	NM_016307	PRRX2	ENSG00000167157	PRRX2	0	0	FALSE	TRUE	normal
16823215	7.17632	NM_022119	PRSS22	ENSG00000005001	PRSS22	0	0	FALSE	TRUE	normal
17084389	4.64278	NM_001197097	PRSS3	ENSG00000010438	PRSS3	0	0	FALSE	TRUE	normal
16712576	3.83393	NM_001282786	PRTFDC1	ENSG00000099256	PRTFDC1	0	0	FALSE	TRUE	normal
16869639	6.21091	NM_000955	PTGER1	ENSG00000160951	PTGER1	0	0	FALSE	TRUE	normal
16908728	5.13989	NM_001199763	PTPRN	ENSG00000054356	PTPRN	0	0	FALSE	TRUE	normal
16919351	5.31446	NM_007050	PTPRT	ENSG00000196090	PTPRT	0	0	FALSE	TRUE	normal
16934643	5.55517	NM_002854	PVALB	ENSG00000100362	PVALB	0	0	FALSE	TRUE	normal
16798254	4.8273	NR_022009	PWAR1	ENSG00000279050	PWAR1	0	0	FALSE	TRUE	normal
16797924	2.57455	ENST00000563016	PWRN4	ENSG00000260232	PWRN4	0	0	FALSE	FALSE	normal
16832423	6.65548	NR_003064	PYY2	ENSG00000237575	PYY2	0	0	FALSE	TRUE	normal
16902683	5.27928	NR_036537	RAB6C-AS1	ENSG00000225449	RAB6C-AS1	0	0	FALSE	TRUE	normal
17125664	3.55453	ENST00000413361	RANP4	ENSG00000225125	RANP4	0	0	FALSE	TRUE	normal
16739942	4.84844	NM_001098670	RASGRP2	ENSG00000068831	RASGRP2	0	0	FALSE	TRUE	normal
16921048	6.66032	NM_080833	RBBP8NL	ENSG00000130701	RBBP8NL	0	0	FALSE	TRUE	normal
16815670	4.13279	XM_005255380	RBFOX1	ENSG00000078328	RBFOX1	0	0	FALSE	TRUE	normal
16881951	5.22772	NM_001008387	REG3G	ENSG00000143954	REG3G	0	0	FALSE	TRUE	normal
16865778	3.55092	ENST00000434937	RFPL4A	ENSG00000223638	RFPL4A	0	0	FALSE	TRUE	normal
16865782	4.44956	ENST00000341750	RFPL4AL1	ENSG00000229292	RFPL4AL1	0	0	FALSE	TRUE	normal
17011790	4.23095	NM_001013734	RFPL4B	ENSG00000251258	RFPL4B	0	0	FALSE	TRUE	normal
17012011	4.21396	NM_173560	RFX6	ENSG00000185002	RFX6	0	0	FALSE	TRUE	normal
16901537	4.5067	NR_024439	RGPD4-AS1	ENSG00000230651	RGPD4-AS1	0	0	FALSE	TRUE	normal
16675290	3.77882	NM_001039152	RGS21	ENSG00000253148	RGS21	0	0	FALSE	TRUE	normal
16674705	4.11949	NM_001137669	RGSL1	ENSG00000121446	RGSL1	0	0	FALSE	TRUE	normal
16672052	6.13045	NM_001256395	RHBG	ENSG00000132677	RHBG	0	0	FALSE	TRUE	normal
16727650	6.80815	NM_014578	RHOD	ENSG00000173156	RHOD	0	0	FALSE	TRUE	normal
16966214	4.52618	NM_001278359	RHOH	ENSG00000168421	RHOH	0	0	FALSE	TRUE	normal
16927581	5.56185	OTTHUMT00000320196	RIMBP3B	ENSG00000274600	RIMBP3B	0	0	FALSE	TRUE	normal
17010198	4.4311	NM_014989	RIMS1	ENSG00000079841	RIMS1	0	0	FALSE	TRUE	normal
17010708	5.67852	NM_001009994	RIPPLY2	ENSG00000203877	RIPPLY2	0	0	FALSE	TRUE	normal
16922639	5.42451	NM_018962	RIPPLY3	ENSG00000183145	RIPPLY3	0	0	FALSE	TRUE	normal
16755465	4.23911	ENST00000538559	RMST	ENSG00000255794	RMST	0	0	FALSE	TRUE	normal
17021752	4.72929	ENST00000410146	RN7SKP110	ENSG00000222078	RN7SKP110	0	0	FALSE	TRUE	normal
16983458	2.4459	ENST00000364845	RN7SKP133	ENSG00000201715	RN7SKP133	0	0	FALSE	FALSE	normal
16906524	5.19675	ENST00000516126	RN7SKP179	ENSG00000251935	RN7SKP179	0	0	FALSE	TRUE	normal
16783979	4.07236	ENST00000364488	RN7SKP193	ENSG00000201358	RN7SKP193	0	0	FALSE	TRUE	normal
17112572	2.96559	ENST00000411328	RN7SKP194	ENSG00000223260	RN7SKP194	0	0	FALSE	FALSE	normal
16879956	2.32948	ENST00000364140	RN7SKP224	ENSG00000201010	RN7SKP224	0	0	FALSE	FALSE	normal
17084479	3.79394	ENST00000515888	RN7SKP24	ENSG00000251697	RN7SKP24	0	0	FALSE	TRUE	normal
16724838	4.07346	ENST00000411066	RN7SKP259	ENSG00000222998	RN7SKP259	0	0	FALSE	TRUE	normal
16687715	2.23843	ENST00000362961	RN7SKP291	ENSG00000199831	RN7SKP291	0	0	FALSE	FALSE	normal
16729023	2.57533	ENST00000411270	RN7SKP297	ENSG00000223202	RN7SKP297	0	0	FALSE	FALSE	normal
16679565	11.0196	ENST00000364888	RN7SKP55	ENSG00000201758	RN7SKP55	0	0	FALSE	TRUE	normal
16998848	5.70867	ENST00000517248	RN7SKP57	ENSG00000253057	RN7SKP57	0	0	FALSE	TRUE	normal
16897035	3.74335	ENST00000516681	RN7SKP66	ENSG00000252490	RN7SKP66	0	0	FALSE	TRUE	normal
16980468	4.58162	ENST00000517142	RNA5SP165	ENSG00000252951	RNA5SP165	0	0	FALSE	TRUE	normal
17010614	4.29549	ENST00000391034	RNA5SP210	ENSG00000212336	RNA5SP210	0	0	FALSE	TRUE	normal
17067422	4.62999	ENST00000365541	RNA5SP259	ENSG00000202411	RNA5SP259	0	0	FALSE	TRUE	normal
17070703	4.46054	ENST00000362484	RNA5SP273	ENSG00000199354	RNA5SP273	0	0	FALSE	TRUE	normal
17093395	4.34388	ENST00000516355	RNA5SP282	ENSG00000252164	RNA5SP282	0	0	FALSE	TRUE	normal
17097209	3.45058	ENST00000411306	RNA5SP294	ENSG00000223238	RNA5SP294	0	0	FALSE	TRUE	normal
16719450	4.69856	ENST00000410808	RNA5SP328	ENSG00000222740	RNA5SP328	0	0	FALSE	TRUE	normal
16721323	1.74389	ENST00000365277	RNA5SP329	ENSG00000202147	RNA5SP329	0	0	FALSE	FALSE	normal
16729220	4.17764	ENST00000411081	RNA5SP344	ENSG00000223013	RNA5SP344	0	0	FALSE	TRUE	normal
16763095	3.02742	ENST00000364838	RNA5SP359	ENSG00000201708	RNA5SP359	0	0	FALSE	TRUE	normal
16754933	3.4445	ENST00000516938	RNA5SP364	ENSG00000252747	RNA5SP364	0	0	FALSE	TRUE	normal
16828808	2.43266	ENST00000364491	RNA5SP433	ENSG00000201361	RNA5SP433	0	0	FALSE	FALSE	normal
16858605	2.37186	ENST00000516737	RNA5SP466	ENSG00000252546	RNA5SP466	0	0	FALSE	FALSE	normal
16917746	3.9588	ENST00000362639	RNA5SP477	ENSG00000199509	RNA5SP477	0	0	FALSE	TRUE	normal
16913075	1.97354	ENST00000363431	RNA5SP483	ENSG00000200301	RNA5SP483	0	0	FALSE	FALSE	normal
16922634	6.20387	ENST00000362936	RNA5SP491	ENSG00000199806	RNA5SP491	0	0	FALSE	TRUE	normal
16895266	2.47896	ENST00000365560	RNA5SP88	ENSG00000202430	RNA5SP88	0	0	FALSE	FALSE	normal
16898576	4.30485	ENST00000516041	RNA5SP96	ENSG00000251850	RNA5SP96	0	0	FALSE	TRUE	normal
16836349	6.2937	NR_002818	RNF126P1	ENSG00000261192	RNF126P1	0	0	FALSE	TRUE	normal
17097432	4.4489	ENST00000297894	RNF183	ENSG00000165188	RNF183	0	0	FALSE	TRUE	normal
17100393	4.5951	NM_031297	RNF208	ENSG00000212864	RNF208	0	0	FALSE	TRUE	normal
16718037	4.97566	ENST00000391111	RNU11-3P	ENSG00000212413	RNU11-3P	0	0	FALSE	TRUE	normal
16987778	4.02027	ENST00000365040	RNU1-140P	ENSG00000201910	RNU1-140P	0	0	FALSE	TRUE	normal
16706894	7.25156	ENST00000363306	RNU1-19P	ENSG00000200176	RNU1-19P	0	0	FALSE	TRUE	normal
16780767	4.38284	ENST00000364285	RNU1-24P	ENSG00000201155	RNU1-24P	0	0	FALSE	TRUE	normal
16961485	3.68983	ENST00000362618	RNU1-70P	ENSG00000199488	RNU1-70P	0	0	FALSE	TRUE	normal
16766940	10.0406	ENST00000363426	RNU1-83P	ENSG00000200296	RNU1-83P	0	0	FALSE	TRUE	normal
16881430	1.91897	ENST00000410604	RNU2-39P	ENSG00000222536	RNU2-39P	0	0	FALSE	FALSE	normal
17087136	3.12958	ENST00000517038	RNU2-46P	ENSG00000252847	RNU2-46P	0	0	FALSE	TRUE	normal
16717702	1.76116	ENST00000410482	RNU2-59P	ENSG00000222414	RNU2-59P	0	0	FALSE	FALSE	normal
17094753	4.09524	ENST00000410533	RNU2-5P	ENSG00000222465	RNU2-5P	0	0	FALSE	TRUE	normal
16731022	2.31433	ENST00000517290	RNU2-60P	ENSG00000253099	RNU2-60P	0	0	FALSE	FALSE	normal
17021544	3.61733	ENST00000411069	RNU2-61P	ENSG00000223001	RNU2-61P	0	0	FALSE	TRUE	normal
17016449	1.91538	ENST00000410868	RNU2-62P	ENSG00000222800	RNU2-62P	0	0	FALSE	FALSE	normal
16942687	3.57737	ENST00000411315	RNU2-64P	ENSG00000223247	RNU2-64P	0	0	FALSE	TRUE	normal
16855562	2.112	ENST00000516061	RNU2-69P	ENSG00000251870	RNU2-69P	0	0	FALSE	FALSE	normal
17048603	3.28877	ENST00000364737	RNU4-16P	ENSG00000201607	RNU4-16P	0	0	FALSE	TRUE	normal
16832656	4.72611	ENST00000410431	RNU4-34P	ENSG00000222363	RNU4-34P	0	0	FALSE	TRUE	normal
16695390	2.44439	ENST00000364738	RNU4-42P	ENSG00000201608	RNU4-42P	0	0	FALSE	FALSE	normal
16664514	6.37244	ENST00000411243	RNU4-61P	ENSG00000223175	RNU4-61P	0	0	FALSE	TRUE	normal
16789303	4.72279	ENST00000364314	RNU4-68P	ENSG00000201184	RNU4-68P	0	0	FALSE	TRUE	normal
17067611	1.67634	ENST00000522581	RNU5A-3P	ENSG00000254172	RNU5A-3P	0	0	FALSE	FALSE	normal
17088098	4.8257	ENST00000384180	RNU6-1013P	ENSG00000206907	RNU6-1013P	0	0	FALSE	TRUE	normal
16877147	5.92067	ENST00000384537	RNU6-1081P	ENSG00000207267	RNU6-1081P	0	0	FALSE	TRUE	normal
17097778	2.18074	ENST00000364574	RNU6-1082P	ENSG00000201444	RNU6-1082P	0	0	FALSE	FALSE	normal
16771277	5.99593	ENST00000516850	RNU6-1088P	ENSG00000252659	RNU6-1088P	0	0	FALSE	TRUE	normal
16764600	2.66337	ENST00000391194	RNU6-1093P	ENSG00000212496	RNU6-1093P	0	0	FALSE	FALSE	normal
16962659	1.95198	ENST00000391187	RNU6-1109P	ENSG00000212489	RNU6-1109P	0	0	FALSE	FALSE	normal
16966210	5.48591	ENST00000363585	RNU6-1112P	ENSG00000200455	RNU6-1112P	0	0	FALSE	TRUE	normal
16915104	2.30607	ENST00000516282	RNU6-1146P	ENSG00000252091	RNU6-1146P	0	0	FALSE	FALSE	normal
16995455	5.11163	ENST00000410811	RNU6-1190P	ENSG00000222743	RNU6-1190P	0	0	FALSE	TRUE	normal
16828694	3.81116	ENST00000516799	RNU6-1191P	ENSG00000252608	RNU6-1191P	0	0	FALSE	TRUE	normal
16851301	3.49884	ENST00000363775	RNU6-1210P	ENSG00000200645	RNU6-1210P	0	0	FALSE	TRUE	normal
16854395	3.07912	ENST00000384431	RNU6-1289P	ENSG00000207160	RNU6-1289P	0	0	FALSE	TRUE	normal
16959981	1.79435	ENST00000515995	RNU6-1294P	ENSG00000251804	RNU6-1294P	0	0	FALSE	FALSE	normal
16696098	1.96818	ENST00000384153	RNU6-1310P	ENSG00000206880	RNU6-1310P	0	0	FALSE	FALSE	normal
16690065	2.39991	ENST00000365389	RNU6-1318P	ENSG00000202259	RNU6-1318P	0	0	FALSE	FALSE	normal
16909914	2.10935	ENST00000516162	RNU6-1333P	ENSG00000251971	RNU6-1333P	0	0	FALSE	FALSE	normal
16816406	4.86399	ENST00000384438	RNU6-1340P	ENSG00000207167	RNU6-1340P	0	0	FALSE	TRUE	normal
16908413	2.31543	ENST00000384663	RNU6-136P	ENSG00000207393	RNU6-136P	0	0	FALSE	FALSE	normal
17020960	4.88889	ENST00000516347	RNU6-155P	ENSG00000252156	RNU6-155P	0	0	FALSE	TRUE	normal
16982357	3.33298	ENST00000364215	RNU6-173P	ENSG00000201085	RNU6-173P	0	0	FALSE	TRUE	normal
16693720	3.49967	ENST00000363350	RNU6-179P	ENSG00000200220	RNU6-179P	0	0	FALSE	TRUE	normal
16976129	2.03221	ENST00000516680	RNU6-197P	ENSG00000252489	RNU6-197P	0	0	FALSE	FALSE	normal
16964314	3.4328	ENST00000362465	RNU6-204P	ENSG00000199335	RNU6-204P	0	0	FALSE	TRUE	normal
17063446	3.39574	ENST00000384116	RNU6-206P	ENSG00000206843	RNU6-206P	0	0	FALSE	TRUE	normal
16824307	3.57094	ENST00000384051	RNU6-213P	ENSG00000206778	RNU6-213P	0	0	FALSE	TRUE	normal
17000672	2.38008	ENST00000363886	RNU6-236P	ENSG00000200756	RNU6-236P	0	0	FALSE	FALSE	normal
16750254	4.45245	ENST00000363016	RNU6-249P	ENSG00000199886	RNU6-249P	0	0	FALSE	TRUE	normal
16762032	1.8945	ENST00000363377	RNU6-254P	ENSG00000200247	RNU6-254P	0	0	FALSE	FALSE	normal
16745279	1.94887	ENST00000410317	RNU6-262P	ENSG00000222249	RNU6-262P	0	0	FALSE	FALSE	normal
16747967	2.08102	ENST00000364910	RNU6-275P	ENSG00000201780	RNU6-275P	0	0	FALSE	FALSE	normal
17078252	2.23867	ENST00000410556	RNU6-285P	ENSG00000222488	RNU6-285P	0	0	FALSE	FALSE	normal
16658971	2.90015	ENST00000384720	RNU6-291P	ENSG00000207451	RNU6-291P	0	0	FALSE	FALSE	normal
16706818	4.19923	ENST00000411132	RNU6-325P	ENSG00000223064	RNU6-325P	0	0	FALSE	TRUE	normal
16800297	7.97599	ENST00000364266	RNU6-353P	ENSG00000201136	RNU6-353P	0	0	FALSE	TRUE	normal
16907718	6.36532	ENST00000390944	RNU6-360P	ENSG00000212246	RNU6-360P	0	0	FALSE	TRUE	normal
16988299	4.77713	ENST00000411247	RNU6-373P	ENSG00000223179	RNU6-373P	0	0	FALSE	TRUE	normal
17046208	5.01021	ENST00000517048	RNU6-389P	ENSG00000252857	RNU6-389P	0	0	FALSE	TRUE	normal
16699550	3.87219	ENST00000363163	RNU6-403P	ENSG00000200033	RNU6-403P	0	0	FALSE	TRUE	normal
17011391	3.20092	ENST00000459408	RNU6-437P	ENSG00000238420	RNU6-437P	0	0	FALSE	TRUE	normal
17056562	2.67516	ENST00000365561	RNU6-438P	ENSG00000202431	RNU6-438P	0	0	FALSE	FALSE	normal
16836858	2.05044	ENST00000362827	RNU6-446P	ENSG00000199697	RNU6-446P	0	0	FALSE	FALSE	normal
16938100	4.94088	ENST00000364292	RNU6-454P	ENSG00000201162	RNU6-454P	0	0	FALSE	TRUE	normal
16942985	2.02776	ENST00000515918	RNU6-488P	ENSG00000251727	RNU6-488P	0	0	FALSE	FALSE	normal
16763017	3.56661	ENST00000517254	RNU6-494P	ENSG00000253063	RNU6-494P	0	0	FALSE	TRUE	normal
16998337	2.51861	ENST00000384270	RNU6-524P	ENSG00000206997	RNU6-524P	0	0	FALSE	FALSE	normal
16748451	2.78331	ENST00000362681	RNU6-545P	ENSG00000199551	RNU6-545P	0	0	FALSE	FALSE	normal
16802042	3.19718	ENST00000384433	RNU6-549P	ENSG00000207162	RNU6-549P	0	0	FALSE	TRUE	normal
16970215	3.35312	ENST00000391057	RNU6-550P	ENSG00000212359	RNU6-550P	0	0	FALSE	TRUE	normal
16885866	2.40849	ENST00000516879	RNU6-579P	ENSG00000252688	RNU6-579P	0	0	FALSE	FALSE	normal
16736266	3.58518	ENST00000364716	RNU6-593P	ENSG00000201586	RNU6-593P	0	0	FALSE	TRUE	normal
16791803	3.05629	ENST00000411155	RNU6-602P	ENSG00000223087	RNU6-602P	0	0	FALSE	TRUE	normal
17022384	2.48647	ENST00000363074	RNU6-653P	ENSG00000199944	RNU6-653P	0	0	FALSE	FALSE	normal
16715783	2.00065	ENST00000365084	RNU6-673P	ENSG00000201954	RNU6-673P	0	0	FALSE	FALSE	normal
16896706	4.27492	ENST00000384565	RNU6-851P	ENSG00000207295	RNU6-851P	0	0	FALSE	TRUE	normal
17068367	3.89722	ENST00000384125	RNU6-895P	ENSG00000206852	RNU6-895P	0	0	FALSE	TRUE	normal
17022612	3.0482	ENST00000384700	RNU6-906P	ENSG00000207431	RNU6-906P	0	0	FALSE	TRUE	normal
16906654	5.13363	ENST00000364943	RNU6-915P	ENSG00000201813	RNU6-915P	0	0	FALSE	TRUE	normal
16920579	1.99276	ENST00000384429	RNU6-929P	ENSG00000207158	RNU6-929P	0	0	FALSE	FALSE	normal
16872405	2.98401	ENST00000383947	RNU6-945P	ENSG00000206674	RNU6-945P	0	0	FALSE	FALSE	normal
16906283	2.41231	ENST00000362756	RNU6-989P	ENSG00000199626	RNU6-989P	0	0	FALSE	FALSE	normal
16681840	3.82048	ENST00000408413	RNU6ATAC18P	ENSG00000221340	RNU6ATAC18P	0	0	FALSE	TRUE	normal
16942050	3.79276	ENST00000388106	RNU6ATAC26P	ENSG00000210841	RNU6ATAC26P	0	0	FALSE	TRUE	normal
16660386	2.17858	ENST00000516105	RNU7-200P	ENSG00000251914	RNU7-200P	0	0	FALSE	FALSE	normal
17053047	2.03782	ENST00000515903	RNU7-20P	ENSG00000251712	RNU7-20P	0	0	FALSE	FALSE	normal
16735727	4.67922	ENST00000516759	RNU7-28P	ENSG00000252568	RNU7-28P	0	0	FALSE	TRUE	normal
16891816	2.92739	ENST00000459349	RNU7-9P	ENSG00000238782	RNU7-9P	0	0	FALSE	FALSE	normal
17022996	4.40869	NM_002944	ROS1	ENSG00000047936	ROS1	0	0	FALSE	TRUE	normal
17013865	6.23707	OTTHUMT00000042761	RP1-101K10.6	ENSG00000227627	RP1-101K10.6	0	0	FALSE	TRUE	normal
16747152	5.13302	OTTHUMT00000400482	RP11-1038A11.1	ENSG00000255983	RP11-1038A11.1	0	0	FALSE	TRUE	normal
16793348	3.6204	OTTHUMT00000412903	RP11-108M12.3	ENSG00000258592	RP11-108M12.3	0	0	FALSE	TRUE	normal
16793711	5.65521	OTTHUMT00000411752	RP11-1112J20.2	ENSG00000259093	RP11-1112J20.2	0	0	FALSE	TRUE	normal
17094372	2.98288	OTTHUMT00000037086	RP11-111F5.3	ENSG00000231212	RP11-111F5.3	0	0	FALSE	FALSE	normal
16684757	6.73643	OTTHUMT00000099440	RP11-114B7.6	ENSG00000224409	RP11-114B7.6	0	0	FALSE	TRUE	normal
16948168	2.64642	OTTHUMT00000348098	RP11-114M1.1	ENSG00000228561	RP11-114M1.1	0	0	FALSE	FALSE	normal
16957278	3.51446	OTTHUMT00000353896	RP11-119D18.1	ENSG00000240895	RP11-119D18.1	0	0	FALSE	TRUE	normal
16719879	5.30154	OTTHUMT00000051134	RP11-122K13.7	ENSG00000226699	RP11-122K13.7	0	0	FALSE	TRUE	normal
16704793	4.39803	OTTHUMT00000047989	RP11-123B3.2	ENSG00000235939	RP11-123B3.2	0	0	FALSE	TRUE	normal
16993286	6.70469	OTTHUMT00000374288	RP11-1259L22.1	ENSG00000253698	RP11-1259L22.1	0	0	FALSE	TRUE	normal
16853863	6.00092	OTTHUMT00000442259	RP11-138E9.2	ENSG00000264876	RP11-138E9.2	0	0	FALSE	TRUE	normal
17122268	6.65	OTTHUMT00000464592	RP11-13J10.1	ENSG00000269707	RP11-13J10.1	0	0	FALSE	TRUE	normal
17059608	5.43463	OTTHUMT00000342905	RP11-142A5.1	ENSG00000235450	RP11-142A5.1	0	0	FALSE	TRUE	normal
16689866	4.05101	OTTHUMT00000029386	RP11-148B18.4	ENSG00000236098	RP11-148B18.4	0	0	FALSE	TRUE	normal
17067182	4.4928	OTTHUMT00000376746	RP11-14I17.2	ENSG00000253430	RP11-14I17.2	0	0	FALSE	TRUE	normal
16749626	5.62646	OTTHUMT00000403574	RP11-155I9.1	ENSG00000257932	RP11-155I9.1	0	0	FALSE	TRUE	normal
17074240	4.78836	OTTHUMT00000374527	RP11-158A14.1	ENSG00000253189	RP11-158A14.1	0	0	FALSE	TRUE	normal
16791630	3.62869	OTTHUMT00000409699	RP11-159L20.2	ENSG00000258558	RP11-159L20.2	0	0	FALSE	TRUE	normal
17086287	3.34907	OTTHUMT00000052823	RP11-15B24.5	ENSG00000228430	RP11-15B24.5	0	0	FALSE	TRUE	normal
16677223	5.90977	OTTHUMT00000090178	RP11-15I11.2	ENSG00000229983	RP11-15I11.2	0	0	FALSE	TRUE	normal
16981561	3.3451	OTTHUMT00000362023	RP11-161D15.2	ENSG00000250043	RP11-161D15.2	0	0	FALSE	TRUE	normal
16960468	4.2269	OTTHUMT00000357112	RP11-167H9.5	ENSG00000241048	RP11-167H9.5	0	0	FALSE	TRUE	normal
17080806	3.3875	OTTHUMT00000381287	RP11-174I12.2	ENSG00000254113	RP11-174I12.2	0	0	FALSE	TRUE	normal
16679276	5.93853	OTTHUMT00000095378	RP11-177F15.1	ENSG00000231877	RP11-177F15.1	0	0	FALSE	TRUE	normal
16979712	4.22057	OTTHUMT00000364059	RP11-184M15.1	ENSG00000248187	RP11-184M15.1	0	0	FALSE	TRUE	normal
16690193	2.93887	OTTHUMT00000029981	RP11-202K23.1	ENSG00000233359	RP11-202K23.1	0	0	FALSE	FALSE	normal
17075565	2.78733	OTTHUMT00000375440	RP11-203E8.1	ENSG00000253891	RP11-203E8.1	0	0	FALSE	FALSE	normal
16676305	5.39174	OTTHUMT00000087890	RP11-203F10.5	ENSG00000231691	RP11-203F10.5	0	0	FALSE	TRUE	normal
16946817	5.18617	OTTHUMT00000356331	RP11-206M11.7	ENSG00000244468	RP11-206M11.7	0	0	FALSE	TRUE	normal
16800756	3.38514	OTTHUMT00000416881	RP11-208K4.1	ENSG00000259754	RP11-208K4.1	0	0	FALSE	TRUE	normal
16728248	4.60439	OTTHUMT00000430311	RP11-211G23.1	ENSG00000259854	RP11-211G23.1	0	0	FALSE	TRUE	normal
16784038	4.78993	OTTHUMT00000411028	RP11-218E20.2	ENSG00000258687	RP11-218E20.2	0	0	FALSE	TRUE	normal
16980869	4.49009	OTTHUMT00000365261	RP11-21G20.3	ENSG00000249041	RP11-21G20.3	0	0	FALSE	TRUE	normal
16742415	6.13871	OTTHUMT00000382867	RP11-21L23.4	ENSG00000254632	RP11-21L23.4	0	0	FALSE	TRUE	normal
17093997	3.29204	OTTHUMT00000052438	RP11-220I1.2	ENSG00000233242	RP11-220I1.2	0	0	FALSE	TRUE	normal
16685983	5.66615	OTTHUMT00000018314	RP11-223A3.1	ENSG00000227527	RP11-223A3.1	0	0	FALSE	TRUE	normal
16970988	3.32271	OTTHUMT00000364586	RP11-223C24.2	ENSG00000251248	RP11-223C24.2	0	0	FALSE	TRUE	normal
16723127	3.73765	OTTHUMT00000388388	RP11-22P4.2	ENSG00000254606	RP11-22P4.2	0	0	FALSE	TRUE	normal
16972053	4.44465	OTTHUMT00000364865	RP11-234O6.2	ENSG00000249568	RP11-234O6.2	0	0	FALSE	TRUE	normal
17005228	5.15159	OTTHUMT00000039981	RP11-239H6.2	ENSG00000227803	RP11-239H6.2	0	0	FALSE	TRUE	normal
17089996	5.95331	OTTHUMT00000106335	RP11-247A12.1	ENSG00000234055	RP11-247A12.1	0	0	FALSE	TRUE	normal
16987461	3.59995	OTTHUMT00000370577	RP11-254I22.2	ENSG00000250158	RP11-254I22.2	0	0	FALSE	TRUE	normal
16998339	3.24705	OTTHUMT00000370532	RP11-254I22.3	ENSG00000249746	RP11-254I22.3	0	0	FALSE	TRUE	normal
16783451	2.98789	OTTHUMT00000409827	RP11-259K15.2	ENSG00000258844	RP11-259K15.2	0	0	FALSE	FALSE	normal
17011945	3.56741	OTTHUMT00000041949	RP11-259P20.1	ENSG00000234117	RP11-259P20.1	0	0	FALSE	TRUE	normal
16749867	3.33088	OTTHUMT00000404498	RP11-267D19.1	ENSG00000257435	RP11-267D19.1	0	0	FALSE	TRUE	normal
16976024	4.32033	OTTHUMT00000361425	RP11-273B19.2	ENSG00000249727	RP11-273B19.2	0	0	FALSE	TRUE	normal
16965099	3.14323	OTTHUMT00000358985	RP11-281P23.1	ENSG00000251152	RP11-281P23.1	0	0	FALSE	TRUE	normal
16955635	3.54668	OTTHUMT00000353800	RP11-285B24.1	ENSG00000243903	RP11-285B24.1	0	0	FALSE	TRUE	normal
16713558	5.69288	OTTHUMT00000047762	RP11-285G1.2	ENSG00000234504	RP11-285G1.2	0	0	FALSE	TRUE	normal
16748237	2.4279	OTTHUMT00000399543	RP11-290C10.1	ENSG00000255882	RP11-290C10.1	0	0	FALSE	FALSE	normal
16734979	3.53312	OTTHUMT00000384691	RP11-290F24.3	ENSG00000254444	RP11-290F24.3	0	0	FALSE	TRUE	normal
16666749	5.65223	OTTHUMT00000029185	RP11-290M5.2	ENSG00000230285	RP11-290M5.2	0	0	FALSE	TRUE	normal
16969360	2.53763	OTTHUMT00000363303	RP11-297P16.3	ENSG00000251577	RP11-297P16.3	0	0	FALSE	FALSE	normal
16978626	2.35077	OTTHUMT00000363302	RP11-297P16.4	ENSG00000250920	RP11-297P16.4	0	0	FALSE	FALSE	normal
16804684	2.79453	OTTHUMT00000416374	RP11-300G22.2	ENSG00000259561	RP11-300G22.2	0	0	FALSE	FALSE	normal
16772883	2.88806	OTTHUMT00000044000	RP11-301J16.7	ENSG00000226619	RP11-301J16.7	0	0	FALSE	FALSE	normal
16835646	4.59942	OTTHUMT00000366203	RP11-304F15.4	ENSG00000248954	RP11-304F15.4	0	0	FALSE	TRUE	normal
16835652	5.83604	OTTHUMT00000376579	RP11-304F15.6	ENSG00000254039	RP11-304F15.6	0	0	FALSE	TRUE	normal
16806246	5.7573	OTTHUMT00000415257	RP11-30G8.1	ENSG00000258853	RP11-30G8.1	0	0	FALSE	TRUE	normal
17046198	5.01006	OTTHUMT00000343069	RP11-310H4.1	ENSG00000223475	RP11-310H4.1	0	0	FALSE	TRUE	normal
16809319	3.66035	OTTHUMT00000418938	RP11-313P18.2	ENSG00000259241	RP11-313P18.2	0	0	FALSE	TRUE	normal
16779975	4.43338	OTTHUMT00000045354	RP11-318G21.4	ENSG00000233379	RP11-318G21.4	0	0	FALSE	TRUE	normal
17084042	3.43627	OTTHUMT00000051950	RP11-321L2.1	ENSG00000231460	RP11-321L2.1	0	0	FALSE	TRUE	normal
16720099	4.76582	OTTHUMT00000385709	RP11-326C3.12	ENSG00000255328	RP11-326C3.12	0	0	FALSE	TRUE	normal
17107851	2.70745	OTTHUMT00000060914	RP11-329E24.6	ENSG00000231937	RP11-329E24.6	0	0	FALSE	FALSE	normal
17099189	7.40982	OTTHUMT00000054735	RP11-334J6.6	ENSG00000230289	RP11-334J6.6	0	0	FALSE	TRUE	normal
16803575	4.75044	OTTHUMT00000418872	RP11-335K5.2	ENSG00000259555	RP11-335K5.2	0	0	FALSE	TRUE	normal
16698168	5.92527	OTTHUMT00000101325	RP11-335O13.8	ENSG00000224671	RP11-335O13.8	0	0	FALSE	TRUE	normal
17118028	5.11274	OTTHUMT00000359237	RP11-341G5.2	ENSG00000224569	RP11-341G5.2	0	0	FALSE	TRUE	normal
17011819	2.59174	OTTHUMT00000041896	RP11-346D19.1	ENSG00000236347	RP11-346D19.1	0	0	FALSE	FALSE	normal
16802490	4.71228	OTTHUMT00000416782	RP11-352D13.5	ENSG00000259504	RP11-352D13.5	0	0	FALSE	TRUE	normal
16763473	3.97436	OTTHUMT00000404206	RP11-352M15.1	ENSG00000257657	RP11-352M15.1	0	0	FALSE	TRUE	normal
17121302	4.157	OTTHUMT00000415918	RP11-356M20.1	ENSG00000259674	RP11-356M20.1	0	0	FALSE	TRUE	normal
16699568	5.22394	OTTHUMT00000090768	RP11-358H9.1	ENSG00000226643	RP11-358H9.1	0	0	FALSE	TRUE	normal
16977156	5.4295	OTTHUMT00000347366	RP11-359D14.3	ENSG00000224218	RP11-359D14.3	0	0	FALSE	TRUE	normal
16928639	4.45145	OTTHUMT00000320736	RP11-375H17.1	ENSG00000226169	RP11-375H17.1	0	0	FALSE	TRUE	normal
16977283	6.01227	OTTHUMT00000362781	RP11-377G16.2	ENSG00000248719	RP11-377G16.2	0	0	FALSE	TRUE	normal
17098729	4.11083	OTTHUMT00000054335	RP11-379C10.4	ENSG00000230536	RP11-379C10.4	0	0	FALSE	TRUE	normal
17086368	4.78114	OTTHUMT00000052873	RP11-380F14.2	ENSG00000233262	RP11-380F14.2	0	0	FALSE	TRUE	normal
16957706	4.08513	OTTHUMT00000354813	RP11-384F7.1	ENSG00000243276	RP11-384F7.1	0	0	FALSE	TRUE	normal
16917394	2.64696	OTTHUMT00000078094	RP11-388K2.1	ENSG00000225181	RP11-388K2.1	0	0	FALSE	FALSE	normal
17069726	3.53444	OTTHUMT00000382725	RP11-396J6.1	ENSG00000255130	RP11-396J6.1	0	0	FALSE	TRUE	normal
17004379	4.59037	OTTHUMT00000039697	RP1-140K8.1	ENSG00000233068	RP1-140K8.1	0	0	FALSE	TRUE	normal
16711525	4.94075	OTTHUMT00000046624	RP11-414H17.5	ENSG00000213994	RP11-414H17.5	0	0	FALSE	TRUE	normal
17010403	4.51115	OTTHUMT00000459169	RP11-415D17.3	ENSG00000237174	RP11-415D17.3	0	0	FALSE	TRUE	normal
16722713	5.05647	OTTHUMT00000389875	RP11-428C19.5	ENSG00000255160	RP11-428C19.5	0	0	FALSE	TRUE	normal
17022618	2.69274	OTTHUMT00000041830	RP11-428F8.2	ENSG00000231046	RP11-428F8.2	0	0	FALSE	FALSE	normal
16676347	4.59427	OTTHUMT00000097796	RP11-430C7.5	ENSG00000240219	RP11-430C7.5	0	0	FALSE	TRUE	normal
16960695	2.81486	OTTHUMT00000353431	RP11-439C8.2	ENSG00000243953	RP11-439C8.2	0	0	FALSE	FALSE	normal
16767040	3.31038	OTTHUMT00000401157	RP11-439H13.2	ENSG00000256199	RP11-439H13.2	0	0	FALSE	TRUE	normal
16688558	4.21878	OTTHUMT00000092523	RP11-439H8.4	ENSG00000237324	RP11-439H8.4	0	0	FALSE	TRUE	normal
17104193	4.27532	OTTHUMT00000056910	RP11-445O16.3	ENSG00000224799	RP11-445O16.3	0	0	FALSE	TRUE	normal
16974819	3.06352	OTTHUMT00000359926	RP11-453O5.1	ENSG00000249547	RP11-453O5.1	0	0	FALSE	TRUE	normal
16728883	2.2233	OTTHUMT00000397658	RP11-456I15.2	ENSG00000255928	RP11-456I15.2	0	0	FALSE	FALSE	normal
16972984	3.58222	OTTHUMT00000347985	RP11-45I20.1	ENSG00000235149	RP11-45I20.1	0	0	FALSE	TRUE	normal
17093144	2.95159	OTTHUMT00000052017	RP11-462B18.2	ENSG00000231193	RP11-462B18.2	0	0	FALSE	FALSE	normal
16723142	2.6337	OTTHUMT00000387986	RP11-466I1.1	ENSG00000254526	RP11-466I1.1	0	0	FALSE	FALSE	normal
16997376	2.78809	OTTHUMT00000368748	RP11-466P24.6	ENSG00000250348	RP11-466P24.6	0	0	FALSE	FALSE	normal
17047650	4.13425	OTTHUMT00000473089	RP11-467H10.2	ENSG00000259628	RP11-467H10.2	0	0	FALSE	TRUE	normal
16821213	6.10147	OTTHUMT00000434544	RP11-467I17.1	ENSG00000261472	RP11-467I17.1	0	0	FALSE	TRUE	normal
16778641	5.7837	OTTHUMT00000468171	RP11-478K15.6	ENSG00000230731	RP11-478K15.6	0	0	FALSE	TRUE	normal
16715957	5.56904	OTTHUMT00000048939	RP11-481G8.2	ENSG00000229569	RP11-481G8.2	0	0	FALSE	TRUE	normal
17067510	3.48976	OTTHUMT00000375602	RP11-486M23.2	ENSG00000253182	RP11-486M23.2	0	0	FALSE	TRUE	normal
16794313	3.46965	OTTHUMT00000413007	RP11-486O13.4	ENSG00000257759	RP11-486O13.4	0	0	FALSE	TRUE	normal
16701535	4.52213	OTTHUMT00000099306	RP11-488L18.8	ENSG00000232347	RP11-488L18.8	0	0	FALSE	TRUE	normal
16988264	3.43168	OTTHUMT00000370934	RP11-492L8.2	ENSG00000250949	RP11-492L8.2	0	0	FALSE	TRUE	normal
16789857	3.47737	OTTHUMT00000409117	RP11-496I2.2	ENSG00000257310	RP11-496I2.2	0	0	FALSE	TRUE	normal
16719512	3.3439	OTTHUMT00000050985	RP11-4C20.3	ENSG00000232259	RP11-4C20.3	0	0	FALSE	TRUE	normal
16964139	4.51113	OTTHUMT00000360902	RP11-503N18.4	ENSG00000248399	RP11-503N18.4	0	0	FALSE	TRUE	normal
16976239	2.69524	OTTHUMT00000365877	RP11-506N2.1	ENSG00000251339	RP11-506N2.1	0	0	FALSE	FALSE	normal
16820868	3.30337	OTTHUMT00000434130	RP11-510M2.6	ENSG00000260520	RP11-510M2.6	0	0	FALSE	TRUE	normal
17081480	4.42776	OTTHUMT00000378268	RP11-513H8.1	ENSG00000253627	RP11-513H8.1	0	0	FALSE	TRUE	normal
16735924	4.34838	OTTHUMT00000386175	RP11-51B23.3	ENSG00000254847	RP11-51B23.3	0	0	FALSE	TRUE	normal
16876941	5.1364	OTTHUMT00000353402	RP11-521D12.1	ENSG00000240687	RP11-521D12.1	0	0	FALSE	TRUE	normal
16805436	4.76754	OTTHUMT00000415391	RP11-522B15.3	ENSG00000259275	RP11-522B15.3	0	0	FALSE	TRUE	normal
16984538	3.03079	OTTHUMT00000367910	RP11-53O19.2	ENSG00000248779	RP11-53O19.2	0	0	FALSE	TRUE	normal
16796641	3.35926	OTTHUMT00000413820	RP11-543C4.3	ENSG00000258672	RP11-543C4.3	0	0	FALSE	TRUE	normal
16695504	6.37841	OTTHUMT00000467404	RP11-544M22.13	ENSG00000270149	RP11-544M22.13	0	0	FALSE	TRUE	normal
16718367	6.28695	OTTHUMT00000050324	RP11-549L6.3	ENSG00000228417	RP11-549L6.3	0	0	FALSE	TRUE	normal
16680031	4.02754	OTTHUMT00000097998	RP11-54O7.11	ENSG00000224969	RP11-54O7.11	0	0	FALSE	TRUE	normal
16695142	2.9093	OTTHUMT00000090626	RP11-550P17.5	ENSG00000228560	RP11-550P17.5	0	0	FALSE	FALSE	normal
17010395	2.8134	OTTHUMT00000041236	RP11-554D15.4	ENSG00000224583	RP11-554D15.4	0	0	FALSE	FALSE	normal
16769202	2.83299	OTTHUMT00000409325	RP11-554E23.2	ENSG00000258308	RP11-554E23.2	0	0	FALSE	FALSE	normal
16965472	4.15324	OTTHUMT00000362975	RP11-556G22.2	ENSG00000248343	RP11-556G22.2	0	0	FALSE	TRUE	normal
16695759	4.17443	OTTHUMT00000076790	RP11-565P22.2	ENSG00000227094	RP11-565P22.2	0	0	FALSE	TRUE	normal
16697862	6.57931	OTTHUMT00000097762	RP11-567E21.3	ENSG00000229821	RP11-567E21.3	0	0	FALSE	TRUE	normal
16701031	3.71327	OTTHUMT00000096220	RP11-567G24.3	ENSG00000233735	RP11-567G24.3	0	0	FALSE	TRUE	normal
16716298	4.30539	OTTHUMT00000049224	RP11-57C13.3	ENSG00000196566	RP11-57C13.3	0	0	FALSE	TRUE	normal
16980142	3.20614	OTTHUMT00000364738	RP11-586L23.1	ENSG00000248747	RP11-586L23.1	0	0	FALSE	TRUE	normal
16737528	5.13233	OTTHUMT00000389899	RP11-58K22.5	ENSG00000254693	RP11-58K22.5	0	0	FALSE	TRUE	normal
16818501	8.52066	OTTHUMT00000431831	RP11-598D12.4	ENSG00000198555	RP11-598D12.4	0	0	FALSE	TRUE	normal
16661435	4.90755	OTTHUMT00000009779	RP1-159A19.4	ENSG00000237429	RP1-159A19.4	0	0	FALSE	TRUE	normal
16945093	6.70537	OTTHUMT00000356623	RP11-59J16.2	ENSG00000240562	RP11-59J16.2	0	0	FALSE	TRUE	normal
16765896	5.05574	OTTHUMT00000407916	RP11-603J24.14	ENSG00000257809	RP11-603J24.14	0	0	FALSE	TRUE	normal
16967182	3.57929	OTTHUMT00000365887	RP11-622J8.1	ENSG00000249111	RP11-622J8.1	0	0	FALSE	TRUE	normal
17080998	4.47963	OTTHUMT00000381475	RP11-622O11.4	ENSG00000254227	RP11-622O11.4	0	0	FALSE	TRUE	normal
17075569	3.55887	OTTHUMT00000375554	RP11-624C23.1	ENSG00000253535	RP11-624C23.1	0	0	FALSE	TRUE	normal
16749236	4.27294	OTTHUMT00000402020	RP11-625L16.1	ENSG00000255745	RP11-625L16.1	0	0	FALSE	TRUE	normal
16947776	3.66819	OTTHUMT00000351306	RP11-637O11.2	ENSG00000241882	RP11-637O11.2	0	0	FALSE	TRUE	normal
16771042	5.78789	OTTHUMT00000401646	RP11-64B16.3	ENSG00000256884	RP11-64B16.3	0	0	FALSE	TRUE	normal
16771045	2.61126	OTTHUMT00000401651	RP11-64B16.4	ENSG00000256609	RP11-64B16.4	0	0	FALSE	FALSE	normal
16749245	5.39817	OTTHUMT00000402090	RP11-662I13.2	ENSG00000255921	RP11-662I13.2	0	0	FALSE	TRUE	normal
16965152	4.14381	OTTHUMT00000359239	RP11-669M16.1	ENSG00000249988	RP11-669M16.1	0	0	FALSE	TRUE	normal
16736698	3.39272	OTTHUMT00000387600	RP11-670N15.1	ENSG00000255167	RP11-670N15.1	0	0	FALSE	TRUE	normal
16704051	4.71552	OTTHUMT00000047630	RP11-672F9.1	ENSG00000226113	RP11-672F9.1	0	0	FALSE	TRUE	normal
16729514	4.4273	OTTHUMT00000391454	RP11-673F18.1	ENSG00000254563	RP11-673F18.1	0	0	FALSE	TRUE	normal
17076471	6.5072	OTTHUMT00000376671	RP11-675F6.4	ENSG00000253361	RP11-675F6.3	0	0	FALSE	TRUE	normal
16870815	4.94693	OTTHUMT00000464022	RP11-678G14.3	ENSG00000268555	RP11-678G14.3	0	0	FALSE	TRUE	normal
17072005	4.57238	OTTHUMT00000380837	RP11-67H2.1	ENSG00000253207	RP11-67H2.1	0	0	FALSE	TRUE	normal
16745866	3.85032	OTTHUMT00000386743	RP11-680F20.4	ENSG00000254790	RP11-680F20.4	0	0	FALSE	TRUE	normal
16978100	4.97799	OTTHUMT00000381039	RP11-681L8.1	ENSG00000254044	RP11-681L8.1	0	0	FALSE	TRUE	normal
16811932	6.18075	OTTHUMT00000419490	RP11-685G9.2	ENSG00000259514	RP11-685G9.2	0	0	FALSE	TRUE	normal
17096792	3.86918	OTTHUMT00000053524	RP11-6F6.1	ENSG00000225002	RP11-6F6.1	0	0	FALSE	TRUE	normal
16971248	3.13673	OTTHUMT00000366941	RP11-6L6.7	ENSG00000251010	RP11-6L6.7	0	0	FALSE	TRUE	normal
16750941	5.77752	OTTHUMT00000405533	RP11-70F11.7	ENSG00000257253	RP11-70F11.7	0	0	FALSE	TRUE	normal
17123636	4.65182	OTTHUMT00000359675	RP11-713C19.2	ENSG00000213331	RP11-713C19.2	0	0	FALSE	TRUE	normal
16969118	3.75172	OTTHUMT00000363750	RP11-724M22.1	ENSG00000251523	RP11-724M22.1	0	0	FALSE	TRUE	normal
16742849	6.56875	OTTHUMT00000392939	RP11-727A23.7	ENSG00000254551	RP11-727A23.7	0	0	FALSE	TRUE	normal
17078367	3.41973	OTTHUMT00000379073	RP11-730G20.1	ENSG00000254080	RP11-730G20.1	0	0	FALSE	TRUE	normal
16745467	5.51299	OTTHUMT00000387624	RP11-730K11.1	ENSG00000246790	RP11-730K11.1	0	0	FALSE	TRUE	normal
16876845	5.4902	OTTHUMT00000353374	RP11-734K21.4	ENSG00000240980	RP11-734K21.4	0	0	FALSE	TRUE	normal
17062808	5.49697	OTTHUMT00000349362	RP11-738B7.1	ENSG00000242078	RP11-738B7.1	0	0	FALSE	TRUE	normal
16680767	6.6871	OTTHUMT00000001338	RP11-740P5.3	ENSG00000231630	RP11-740P5.3	0	0	FALSE	TRUE	normal
16977855	3.64767	OTTHUMT00000363598	RP11-742B18.1	ENSG00000249001	RP11-742B18.1	0	0	FALSE	TRUE	normal
16813642	3.86641	OTTHUMT00000416597	RP11-753A21.1	ENSG00000259478	RP11-753A21.1	0	0	FALSE	TRUE	normal
16769137	2.37081	OTTHUMT00000408810	RP11-755O11.2	ENSG00000257514	RP11-755O11.2	0	0	FALSE	FALSE	normal
16977601	3.32846	OTTHUMT00000363957	RP11-767N15.1	ENSG00000249171	RP11-767N15.1	0	0	FALSE	TRUE	normal
16813508	4.61008	OTTHUMT00000415170	RP11-76E17.2	ENSG00000259123	RP11-76E17.2	0	0	FALSE	TRUE	normal
16805335	3.32743	OTTHUMT00000415174	RP11-76E17.4	ENSG00000258831	RP11-76E17.4	0	0	FALSE	TRUE	normal
16715732	3.60112	OTTHUMT00000048776	RP11-77G23.5	ENSG00000227186	RP11-77G23.5	0	0	FALSE	TRUE	normal
17003671	6.05975	OTTHUMT00000374246	RP11-798K23.4	ENSG00000253652	RP11-798K23.4	0	0	FALSE	TRUE	normal
16976271	3.44437	OTTHUMT00000361762	RP11-798L4.1	ENSG00000205682	RP11-798L4.1	0	0	FALSE	TRUE	normal
16965849	3.80986	OTTHUMT00000360333	RP11-79E3.2	ENSG00000250723	RP11-79E3.2	0	0	FALSE	TRUE	normal
16738861	5.11064	OTTHUMT00000395741	RP11-804A23.2	ENSG00000255959	RP11-804A23.2	0	0	FALSE	TRUE	normal
16763099	3.69728	OTTHUMT00000403913	RP11-804F13.1	ENSG00000258119	RP11-804F13.1	0	0	FALSE	TRUE	normal
16983533	3.92823	OTTHUMT00000375796	RP11-804N13.1	ENSG00000253766	RP11-804N13.1	0	0	FALSE	TRUE	normal
16828925	4.372	OTTHUMT00000467195	RP11-805I24.4	ENSG00000268078	RP11-805I24.4	0	0	FALSE	TRUE	normal
16769457	3.31802	OTTHUMT00000407792	RP11-818F20.5	ENSG00000257732	RP11-818F20.5	0	0	FALSE	TRUE	normal
16792547	2.7658	OTTHUMT00000410522	RP11-831F12.2	ENSG00000258400	RP11-831F12.2	0	0	FALSE	FALSE	normal
16764814	5.36605	OTTHUMT00000405179	RP11-845M18.7	ENSG00000257830	RP11-845M18.7	0	0	FALSE	TRUE	normal
16661907	5.63229	OTTHUMT00000381911	RP11-84A19.3	ENSG00000254545	RP11-84A19.3	0	0	FALSE	TRUE	normal
16790135	3.62882	OTTHUMT00000411340	RP11-84C10.3	ENSG00000258772	RP11-84C10.3	0	0	FALSE	TRUE	normal
16743414	5.30557	OTTHUMT00000396687	RP11-856F16.2	ENSG00000256469	RP11-856F16.2	0	0	FALSE	TRUE	normal
16855807	5.32766	OTTHUMT00000442445	RP11-861L17.3	ENSG00000264472	RP11-861L17.3	0	0	FALSE	TRUE	normal
16966797	4.63704	OTTHUMT00000361531	RP11-89B16.1	ENSG00000249706	RP11-89B16.1	0	0	FALSE	TRUE	normal
17056558	3.96404	OTTHUMT00000343605	RP11-89N17.3	ENSG00000233219	RP11-89N17.3	0	0	FALSE	TRUE	normal
17069269	3.37505	OTTHUMT00000383467	RP11-91I20.1	ENSG00000255289	RP11-91I20.1	0	0	FALSE	TRUE	normal
17070217	2.6031	OTTHUMT00000379416	RP11-91P17.1	ENSG00000254001	RP11-91P17.1	0	0	FALSE	FALSE	normal
16921105	6.1826	OTTHUMT00000080051	RP11-93B14.4	ENSG00000223669	RP11-93B14.4	0	0	FALSE	TRUE	normal
17070266	4.28868	OTTHUMT00000379180	RP11-941H19.3	ENSG00000253238	RP11-941H19.3	0	0	FALSE	TRUE	normal
16795690	4.2689	OTTHUMT00000411021	RP11-944C7.1	ENSG00000258792	RP11-944C7.1	0	0	FALSE	TRUE	normal
16762689	5.20736	OTTHUMT00000403477	RP11-946L16.1	ENSG00000257258	RP11-946L16.1	0	0	FALSE	TRUE	normal
16974746	3.30223	OTTHUMT00000365542	RP11-94H6.1	ENSG00000249441	RP11-94H6.1	0	0	FALSE	TRUE	normal
16707274	3.74321	OTTHUMT00000049337	RP11-94M14.2	ENSG00000224750	RP11-94M14.2	0	0	FALSE	TRUE	normal
16701572	4.20619	OTTHUMT00000097755	RP11-978I15.10	ENSG00000236817	RP11-978I15.10	0	0	FALSE	TRUE	normal
16933431	4.4714	OTTHUMT00000320628	RP1-213J1P__B.1	ENSG00000227838	RP1-213J1P__B.1	0	0	FALSE	TRUE	normal
16934305	4.87483	OTTHUMT00000128992	RP1-302D9.1	ENSG00000228622	RP1-302D9.1	0	0	FALSE	TRUE	normal
16673425	2.91445	OTTHUMT00000097976	RP1-313L4.3	ENSG00000232194	RP1-313L4.3	0	0	FALSE	FALSE	normal
17105239	4.10181	OTTHUMT00000057428	RP13-212L9.1	ENSG00000206062	RP13-212L9.1	0	0	FALSE	TRUE	normal
16971133	3.70312	OTTHUMT00000365113	RP13-539F13.3	ENSG00000250406	RP13-539F13.3	0	0	FALSE	TRUE	normal
16722075	4.94076	OTTHUMT00000385878	RP13-631K18.3	ENSG00000254991	RP13-631K18.3	0	0	FALSE	TRUE	normal
16960106	4.63062	OTTHUMT00000355002	RP13-635I23.3	ENSG00000240888	RP13-635I23.3	0	0	FALSE	TRUE	normal
17024356	4.1991	OTTHUMT00000042505	RP1-45I4.3	ENSG00000227192	RP1-45I4.3	0	0	FALSE	TRUE	normal
16770177	5.11644	OTTHUMT00000404687	RP1-46F2.3	ENSG00000258240	RP1-46F2.3	0	0	FALSE	TRUE	normal
16770471	4.3285	OTTHUMT00000405897	RP1-71H24.1	ENSG00000257452	RP1-71H24.1	0	0	FALSE	TRUE	normal
16933685	5.58544	OTTHUMT00000322077	RP1-76B20.11	ENSG00000232396	RP1-76B20.11	0	0	FALSE	TRUE	normal
17067786	3.87863	OTTHUMT00000376665	RP1-84O15.2	ENSG00000253108	RP1-84O15.2	0	0	FALSE	TRUE	normal
17013840	2.29416	OTTHUMT00000042742	RP3-398G3.5	ENSG00000226193	RP3-398G3.5	0	0	FALSE	FALSE	normal
16786245	5.79529	OTTHUMT00000414426	RP3-414A15.2	ENSG00000258695	RP3-414A15.2	0	0	FALSE	TRUE	normal
17016254	3.99492	OTTHUMT00000040031	RP3-425P12.1	ENSG00000223623	RP3-425P12.1	0	0	FALSE	TRUE	normal
16933756	6.14425	OTTHUMT00000320511	RP3-438O4.4	ENSG00000225676	RP3-438O4.4	0	0	FALSE	TRUE	normal
17024772	5.68243	OTTHUMT00000043922	RP3-443C4.2	ENSG00000233823	RP3-443C4.2	0	0	FALSE	TRUE	normal
17005014	5.24328	OTTHUMT00000039919	RP3-448I9.1	ENSG00000234540	RP3-448I9.1	0	0	FALSE	TRUE	normal
17009282	5.53299	OTTHUMT00000040744	RP3-449H6.1	ENSG00000237530	RP3-449H6.1	0	0	FALSE	TRUE	normal
16928982	4.50609	OTTHUMT00000321955	RP4-539M6.14	ENSG00000181123	RP4-539M6.14	0	0	FALSE	TRUE	normal
16661788	4.1219	OTTHUMT00000091345	RP4-591L5.2	ENSG00000231949	RP4-591L5.2	0	0	FALSE	TRUE	normal
16692285	5.12312	OTTHUMT00000102088	RP4-704D21.2	ENSG00000234225	RP4-704D21.2	0	0	FALSE	TRUE	normal
17058276	3.3902	OTTHUMT00000344642	RP4-736H5.3	ENSG00000233423	RP4-736H5.3	0	0	FALSE	TRUE	normal
16657758	5.59929	OTTHUMT00000008135	RP4-758J18.7	ENSG00000225905	RP4-758J18.7	0	0	FALSE	TRUE	normal
16687911	4.4488	OTTHUMT00000024224	RP4-782L23.2	ENSG00000226883	RP4-782L23.2	0	0	FALSE	TRUE	normal
16691969	8.82871	OTTHUMT00000384603	RP4-791M13.3	ENSG00000254539	RP4-791M13.3	0	0	FALSE	TRUE	normal
17122794	5.39324	OTTHUMT00000470101	RP4-806M20.5	ENSG00000270279	RP4-806M20.5	0	0	FALSE	TRUE	normal
16675297	3.60461	OTTHUMT00000098613	RP5-1011O1.3	ENSG00000236069	RP5-1011O1.3	0	0	FALSE	TRUE	normal
16913716	5.71995	OTTHUMT00000079225	RP5-1031J8.1	ENSG00000229976	RP5-1031J8.1	0	0	FALSE	TRUE	normal
17086693	5.25686	OTTHUMT00000144686	RP5-1050E16.2	ENSG00000226206	RP5-1050E16.2	0	0	FALSE	TRUE	normal
16934554	5.30617	OTTHUMT00000319022	RP5-1119A7.14	ENSG00000228719	RP5-1119A7.14	0	0	FALSE	TRUE	normal
17059591	3.83691	OTTHUMT00000350757	RP5-1121E10.2	ENSG00000238358	RP5-1121E10.2	0	0	FALSE	TRUE	normal
17113573	5.11518	OTTHUMT00000058025	RP5-1139I1.2	ENSG00000226661	RP5-1139I1.2	0	0	FALSE	TRUE	normal
16846543	4.9258	OTTHUMT00000366660	RP5-875H18.4	ENSG00000250282	RP5-875H18.4	0	0	FALSE	TRUE	normal
16741169	2.0602	OTTHUMT00000394105	RP5-903G2.2	ENSG00000254610	RP5-903G2.2	0	0	FALSE	FALSE	normal
16915688	7.21167	OTTHUMT00000080037	RP5-908M14.5	ENSG00000233017	RP5-908M14.5	0	0	FALSE	TRUE	normal
16917386	3.37713	OTTHUMT00000078093	RP5-974N19.1	ENSG00000237832	RP5-974N19.1	0	0	FALSE	TRUE	normal
16911391	2.90955	OTTHUMT00000077960	RP5-986I17.2	ENSG00000232738	RP5-986I17.2	0	0	FALSE	FALSE	normal
17047744	3.6717	NR_003680	RPL13AP17	ENSG00000231322	RPL13AP17	0	0	FALSE	TRUE	normal
16903863	5.7925	NM_019845	RPRM	ENSG00000177519	RPRM	0	0	FALSE	TRUE	normal
17104845	5.51244	NR_002309	RPS26P11	ENSG00000196933	RPS26P11	0	0	FALSE	TRUE	normal
16926050	4.74668	NM_080860	RSPH1	ENSG00000160188	RSPH1	0	0	FALSE	TRUE	normal
16890723	5.6575	NR_034176	RUFY4	ENSG00000188282	RUFY4	0	0	FALSE	TRUE	normal
16983836	5.62692	NM_016568	RXFP3	ENSG00000182631	RXFP3	0	0	FALSE	TRUE	normal
16693427	3.8916	NM_002963	S100A7	ENSG00000143556	S100A7	0	0	FALSE	TRUE	normal
16693414	4.8791	ENST00000477801	S100A8	ENSG00000143546	S100A8	0	0	FALSE	TRUE	normal
16856906	6.37843	NM_003775	S1PR4	ENSG00000125910	S1PR4	0	0	FALSE	TRUE	normal
16892525	5.7193	NM_000541	SAG	ENSG00000130561	SAG	0	0	FALSE	TRUE	normal
17023517	4.24743	NM_001017373	SAMD3	ENSG00000164483	SAMD3	0	0	FALSE	TRUE	normal
17106877	5.67135	NM_018990	SASH3	ENSG00000122122	SASH3	0	0	FALSE	TRUE	normal
17112488	4.30015	NM_001012980	SATL1	ENSG00000184788	SATL1	0	0	FALSE	TRUE	normal
16871403	6.49362	NM_001166034	SBSN	ENSG00000189001	SBSN	0	0	FALSE	TRUE	normal
16871259	6.37066	NR_027620	SCGB1B2P	ENSG00000268751	SCGB1B2P	0	0	FALSE	TRUE	normal
16725846	3.2025	NM_002411	SCGB2A2	ENSG00000110484	SCGB2A2	0	0	FALSE	TRUE	normal
16816962	5.34523	NM_001039	SCNN1G	ENSG00000166828	SCNN1G	0	0	FALSE	TRUE	normal
16916362	5.36945	NM_033129	SCRT2	ENSG00000215397	SCRT2	0	0	FALSE	TRUE	normal
16902233	5.35218	NM_002980	SCTR	ENSG00000080293	SCTR	0	0	FALSE	TRUE	normal
16796286	4.0376	NM_001042518	SERPINA9	ENSG00000170054	SERPINA9	0	0	FALSE	TRUE	normal
16711695	3.51653	NR_027082	SFTA1P	ENSG00000225383	SFTA1P	0	0	FALSE	TRUE	normal
16706522	3.98342	NM_001093770	SFTPA1	ENSG00000122852	SFTPA1	0	0	FALSE	TRUE	normal
17074896	4.95099	NM_139167	SGCZ	ENSG00000185053	SGCZ	0	0	FALSE	TRUE	normal
16728425	6.23557	NR_046567	SHANK2-AS1	ENSG00000226627	SHANK2-AS1	0	0	FALSE	TRUE	normal
16728429	4.82342	ENST00000429268	SHANK2-AS2	ENSG00000236262	SHANK2-AS2	0	0	FALSE	TRUE	normal
16866435	6.56071	NM_012435	SHC2	ENSG00000129946	SHC2	0	0	FALSE	TRUE	normal
16916802	6.05179	NM_023068	SIGLEC1	ENSG00000088827	SIGLEC1	0	0	FALSE	TRUE	normal
16874878	5.90959	NM_053003	SIGLEC12	ENSG00000254521	SIGLEC12	0	0	FALSE	TRUE	normal
17022018	4.38082	ENST00000369208	SIM1	ENSG00000112246	SIM1	0	0	FALSE	TRUE	normal
16916462	4.30271	NM_001122962	SIRPB2	ENSG00000196209	SIRPB2	0	0	FALSE	TRUE	normal
16879659	5.78699	NM_005413	SIX3	ENSG00000138083	SIX3	0	0	FALSE	TRUE	normal
16855071	5.26779	NM_001278063	SKOR2	ENSG00000215474	SKOR2	0	0	FALSE	TRUE	normal
17081373	5.1656	NM_001045556	SLA	ENSG00000155926	SLA	0	0	FALSE	TRUE	normal
17062378	4.34157	ENST00000194130	SLC13A1	ENSG00000081800	SLC13A1	0	0	FALSE	TRUE	normal
16840417	5.16989	NM_001143838	SLC13A5	ENSG00000141485	SLC13A5	0	0	FALSE	TRUE	normal
16780481	4.65712	NM_005073	SLC15A1	ENSG00000088386	SLC15A1	0	0	FALSE	TRUE	normal
16869725	5.19185	NR_073589	SLC1A6	ENSG00000105143	SLC1A6	0	0	FALSE	TRUE	normal
16739673	5.63788	NM_001184732	SLC22A8	ENSG00000149452	SLC22A8	0	0	FALSE	TRUE	normal
16774548	4.9745	NR_047031	SLC25A30-AS1	ENSG00000251015	SLC25A30-AS1	0	0	FALSE	TRUE	normal
17009974	4.99744	NR_026540	SLC25A51P1	ENSG00000220483	SLC25A51P1	0	0	FALSE	TRUE	normal
16988837	3.9134	NM_001017372	SLC27A6	ENSG00000113396	SLC27A6	0	0	FALSE	TRUE	normal
16802088	5.60573	NM_178859	SLC51B	ENSG00000186198	SLC51B	0	0	FALSE	TRUE	normal
16817154	5.13152	NM_001258411	SLC5A11	ENSG00000158865	SLC5A11	0	0	FALSE	TRUE	normal
17106398	4.1489	NM_007231	SLC6A14	ENSG00000268104	SLC6A14	0	0	FALSE	TRUE	normal
16950766	2.98082	NR_046647	SLC6A1-AS1	ENSG00000232287	SLC6A1-AS1	0	0	FALSE	FALSE	normal
16780092	4.0216	NM_001281503	SLITRK1	ENSG00000178235	SLITRK1	0	0	FALSE	TRUE	normal
16744043	4.75405	NM_003063	SLN	ENSG00000170290	SLN	0	0	FALSE	TRUE	normal
16778632	4.2936	NM_024058	SMIM2	ENSG00000139656	SMIM2	0	0	FALSE	TRUE	normal
16815601	4.57644	NM_001253790	SMIM22	ENSG00000267795	SMIM22	0	0	FALSE	TRUE	normal
17014798	4.45727	NM_001166412	SMOC2	ENSG00000112562	SMOC2	0	0	FALSE	TRUE	normal
16829815	6.10509	NM_001114974	SMTNL2	ENSG00000188176	SMTNL2	0	0	FALSE	TRUE	normal
16988477	4.83301	uc003ksx.1	SNCAIP	ENSG00000064692	SNCAIP	0	0	FALSE	TRUE	normal
16699507	4.30198	NR_002994	SNORA36B	ENSG00000222370	SNORA36B	0	0	FALSE	TRUE	normal
16904484	2.86274	NR_033309	SNORA70F	ENSG00000206869	SNORA70F	0	0	FALSE	FALSE	normal
16788663	7.95824	NR_003207	SNORD114-14	ENSG00000199593	SNORD114-14	0	0	FALSE	TRUE	normal
16788681	2.15513	NR_003213	SNORD114-20	ENSG00000202048	SNORD114-20	0	0	FALSE	FALSE	normal
16788620	2.83349	NR_003195	SNORD114-3	ENSG00000201839	SNORD114-3	0	0	FALSE	FALSE	normal
16798158	4.63299	NR_003326	SNORD116-11	ENSG00000206609	SNORD116-11	0	0	FALSE	TRUE	normal
16798160	2.2583	NR_003327	SNORD116-12	ENSG00000207197	SNORD116-12	0	0	FALSE	FALSE	normal
16798222	2.13562	NR_003339	SNORD116-25	ENSG00000252326	SNORD116-25	0	0	FALSE	FALSE	normal
16798242	3.78351	NR_047032	SNORD116-30	ENSG00000252277	SNORD116-30	0	0	FALSE	TRUE	normal
17119732	9.4915	NR_000016	SNORD36C	ENSG00000252542	SNORD36C	0	0	FALSE	TRUE	normal
16700498	3.7855	NR_033826	SNRPD2P2	ENSG00000223982	SNRPD2P2	0	0	FALSE	TRUE	normal
16876520	4.87798	NM_018968	SNTG2	ENSG00000172554	SNTG2	0	0	FALSE	TRUE	normal
17002226	5.38097	NM_178424	SOX30	ENSG00000039600	SOX30	0	0	FALSE	TRUE	normal
16703150	4.89792	NM_001253855	SPAG6	ENSG00000077327	SPAG6	0	0	FALSE	TRUE	normal
17107462	3.97773	NM_001009613	SPANXN4	ENSG00000189326	SPANXN4	0	0	FALSE	TRUE	normal
16839695	3.44681	NM_001170695	SPATA22	ENSG00000141255	SPATA22	0	0	FALSE	TRUE	normal
17086265	4.56106	NR_026851	SPATA31D5P	ENSG00000240632	SPATA31D5P	0	0	FALSE	TRUE	normal
16981694	4.07569	NM_144644	SPATA4	ENSG00000150628	SPATA4	0	0	FALSE	TRUE	normal
17018408	6.82016	NM_001252294	SPDEF	ENSG00000124664	SPDEF	0	0	FALSE	TRUE	normal
16841048	5.36577	NM_001128076	SPDYE4	ENSG00000183318	SPDYE4	0	0	FALSE	TRUE	normal
17058351	5.69241	uc010lal.1	SPDYE7P	ENSG00000179994	SPDYE7P	0	0	FALSE	TRUE	normal
16990778	3.05803	ENST00000512953	SPINK13	ENSG00000214510	SPINK13	0	0	FALSE	TRUE	normal
16990787	4.13554	ENST00000274565	SPINK7	ENSG00000145879	SPINK7	0	0	FALSE	TRUE	normal
16915134	3.25154	NM_012444	SPO11	ENSG00000054796	SPO11	0	0	FALSE	TRUE	normal
16693357	6.07305	ENST00000392653	SPRR2A	ENSG00000241794	SPRR2A	0	0	FALSE	TRUE	normal
16693375	6.3129	NM_001014450	SPRR2F	ENSG00000244094	SPRR2F	0	0	FALSE	TRUE	normal
16961056	4.7723	NM_001040100	SPTSSB	ENSG00000196542	SPTSSB	0	0	FALSE	TRUE	normal
16986694	4.70894	NM_032567	SPZ1	ENSG00000164299	SPZ1	0	0	FALSE	TRUE	normal
16916352	7.01094	NM_080725	SRXN1	ENSG00000271303	SRXN1	0	0	FALSE	TRUE	normal
16702790	3.75212	NR_034129	ST8SIA6-AS1	ENSG00000204832	ST8SIA6-AS1	0	0	FALSE	TRUE	normal
17051956	3.84172	NM_182489	STRA8	ENSG00000146857	STRA8	0	0	FALSE	TRUE	normal
16884045	3.83045	NR_037191	SULT1C2P1	ENSG00000237223	SULT1C2P1	0	0	FALSE	TRUE	normal
16884020	3.40692	NM_001008743	SULT1C3	ENSG00000196228	SULT1C3	0	0	FALSE	TRUE	normal
16935879	5.55647	ENST00000422525	SULT4A1	ENSG00000130540	SULT4A1	0	0	FALSE	TRUE	normal
16896467	2.92834	NM_001032377	SULT6B1	ENSG00000138068	SULT6B1	0	0	FALSE	FALSE	normal
16918363	5.70739	NM_080675	SUN5	ENSG00000167098	SUN5	0	0	FALSE	TRUE	normal
16936643	4.2984	NM_001123225	SYCE3	ENSG00000217442	SYCE3	0	0	FALSE	TRUE	normal
16794695	5.14769	NM_001105579	SYNDIG1L	ENSG00000183379	SYNDIG1L	0	0	FALSE	TRUE	normal
16942344	4.44691	uc010hnt.3	SYNPR	ENSG00000163630	SYNPR	0	0	FALSE	TRUE	normal
16854828	4.14355	NM_020783	SYT4	ENSG00000132872	SYT4	0	0	FALSE	TRUE	normal
16978631	4.54617	NM_001059	TACR3	ENSG00000169836	TACR3	0	0	FALSE	TRUE	normal
16682450	5.79653	NM_152232	TAS1R2	ENSG00000179002	TAS1R2	0	0	FALSE	TRUE	normal
16832336	5.17549	NR_033892	TBC1D3P5	ENSG00000266433	TBC1D3P5	0	0	FALSE	TRUE	normal
16793277	4.42194	NM_199047	TBPL2	ENSG00000182521	TBPL2	0	0	FALSE	TRUE	normal
16835313	5.9574	NM_013351	TBX21	ENSG00000073861	TBX21	0	0	FALSE	TRUE	normal
17105543	3.75097	NM_080390	TCEAL2	ENSG00000184905	TCEAL2	0	0	FALSE	TRUE	normal
16916349	5.68939	NM_004609	TCF15	ENSG00000125878	TCF15	0	0	FALSE	TRUE	normal
16878114	6.11037	NM_175769	TCF23	ENSG00000163792	TCF23	0	0	FALSE	TRUE	normal
17019574	5.55004	NM_182539	TCTE1	ENSG00000146221	TCTE1	0	0	FALSE	TRUE	normal
17008384	4.59201	ENST00000373170	TDRG1	ENSG00000204091	TDRG1	0	0	FALSE	TRUE	normal
16862804	4.35744	NM_031451	TEX101	ENSG00000131126	TEX101	0	0	FALSE	TRUE	normal
16898801	4.04474	NR_046798	TGFA-IT1	ENSG00000224606	TGFA-IT1	0	0	FALSE	TRUE	normal
17023405	3.37169	NM_001010923	THEMIS	ENSG00000172673	THEMIS	0	0	FALSE	TRUE	normal
16886066	4.13537	NM_001080427	THSD7B	ENSG00000144229	THSD7B	0	0	FALSE	TRUE	normal
16849822	6.14765	NM_178520	TMEM105	ENSG00000185332	TMEM105	0	0	FALSE	TRUE	normal
17060167	6.36734	NM_001134450	TMEM130	ENSG00000166448	TMEM130	0	0	FALSE	TRUE	normal
16772405	5.54194	NM_133448	TMEM132D	ENSG00000151952	TMEM132D	0	0	FALSE	TRUE	normal
16927261	7.03939	AK093171	TMEM191B	ENSG00000278558	TMEM191B	0	0	FALSE	TRUE	normal
17055640	5.27021	ENST00000405764	TMEM196	ENSG00000173452	TMEM196	0	0	FALSE	TRUE	normal
16962671	4.11541	NM_207316	TMEM207	ENSG00000198398	TMEM207	0	0	FALSE	TRUE	normal
16793644	5.25783	NM_001017970	TMEM30B	ENSG00000182107	TMEM30B	0	0	FALSE	TRUE	normal
17105770	4.85689	NM_182541	TMEM31	ENSG00000179363	TMEM31	0	0	FALSE	TRUE	normal
16950877	5.60495	NM_001284406	TMEM40	ENSG00000088726	TMEM40	0	0	FALSE	TRUE	normal
16786872	6.05196	NM_020431	TMEM63C	ENSG00000165548	TMEM63C	0	0	FALSE	TRUE	normal
16678532	3.3271	ENST00000323223	TMEM78	ENSG00000177800	TMEM78	0	0	FALSE	TRUE	normal
16976455	3.3217	NM_001114387	TMPRSS11A	ENSG00000187054	TMPRSS11A	0	0	FALSE	TRUE	normal
16815918	3.16155	NM_001192	TNFRSF17	ENSG00000048462	TNFRSF17	0	0	FALSE	TRUE	normal
16680075	6.97891	NM_004195	TNFRSF18	ENSG00000186891	TNFRSF18	0	0	FALSE	TRUE	normal
16681288	4.22771	NM_001561	TNFRSF9	ENSG00000049249	TNFRSF9	0	0	FALSE	TRUE	normal
16954817	6.96214	ENST00000232975	TNNC1	ENSG00000114854	TNNC1	0	0	FALSE	TRUE	normal
16949537	4.15954	NM_001114978	TP63	ENSG00000073282	TP63	0	0	FALSE	TRUE	normal
16680874	4.68748	NR_033709	TP73-AS1	ENSG00000227372	TP73-AS1	0	0	FALSE	TRUE	normal
17083444	3.97812	NM_001001874	TPD52L3	ENSG00000170777	TPD52L3	0	0	FALSE	TRUE	normal
16822637	6.91628	NM_024164	TPSB2	ENSG00000197253	TPSB2	0	0	FALSE	TRUE	normal
16822629	6.5052	NM_012467	TPSG1	ENSG00000116176	TPSG1	0	0	FALSE	TRUE	normal
17022952	3.63066	NM_001139444	TRAPPC3L	ENSG00000173626	TRAPPC3L	0	0	FALSE	TRUE	normal
16781904	4.88777	ENST00000390445	TRAV17	ENSG00000211797	TRAV17	0	0	FALSE	TRUE	normal
16781986	3.88916	ENST00000390468	TRAV41	ENSG00000211820	TRAV41	0	0	FALSE	TRUE	normal
17052685	5.50415	ENST00000466254	TRBC2	ENSG00000211772	TRBC2	0	0	FALSE	TRUE	normal
17063796	5.32388	ENST00000454561	TRBV5-4	ENSG00000230099	TRBV5-4	0	0	FALSE	TRUE	normal
17019056	5.34185	NM_018643	TREM1	ENSG00000124731	TREM1	0	0	FALSE	TRUE	normal
17019040	5.34048	NM_024807	TREML2	ENSG00000112195	TREML2	0	0	FALSE	TRUE	normal
16767606	3.50879	NR_026836	TRHDE-AS1	ENSG00000236333	TRHDE-AS1	0	0	FALSE	TRUE	normal
16998974	2.91336	ENST00000503723	TRIM36-IT1	ENSG00000250472	TRIM36-IT1	0	0	FALSE	FALSE	normal
16972123	5.08889	NM_001258025	TRIM60	ENSG00000176979	TRIM60	0	0	FALSE	TRUE	normal
16734441	6.39426	NM_014555	TRPM5	ENSG00000070985	TRPM5	0	0	FALSE	TRUE	normal
16858424	4.8664	NM_001282509	TSPAN16	ENSG00000130167	TSPAN16	0	0	FALSE	TRUE	normal
17008928	6.72998	NM_032538	TTBK1	ENSG00000146216	TTBK1	0	0	FALSE	TRUE	normal
16783537	4.48132	ENST00000267368	TTC6	ENSG00000139865	TTC6	0	0	FALSE	TRUE	normal
16657656	6.69565	NM_153254	TTLL10	ENSG00000162571	TTLL10	0	0	FALSE	TRUE	normal
17117165	4.22184	NR_001542	TTTY10	ENSG00000229236	TTTY10	0	0	FALSE	TRUE	normal
17097060	3.14449	NM_001003936	TXNDC8	ENSG00000204193	TXNDC8	0	0	FALSE	TRUE	normal
16982931	6.07624	NM_001145161	UBE2QL1	ENSG00000215218	UBE2QL1	0	0	FALSE	TRUE	normal
17100833	7.91339	ENST00000308076	UNC93B3	ENSG00000172971	UNC93B3	0	0	FALSE	TRUE	normal
16931190	5.30303	NM_006953	UPK3A	ENSG00000100373	UPK3A	0	0	FALSE	TRUE	normal
16886736	4.36326	NM_001135098	UPP2	ENSG00000007001	UPP2	0	0	FALSE	TRUE	normal
16857490	5.15792	NM_001258206	VAV1	ENSG00000141968	VAV1	0	0	FALSE	TRUE	normal
17101304	2.06091	NM_013452	VCX	ENSG00000182583	VCX	0	0	FALSE	FALSE	normal
16694527	4.38685	NM_001004319	VHLL	ENSG00000189030	VHLL	0	0	FALSE	TRUE	normal
16879094	4.96365	NM_053276	VIT	ENSG00000205221	VIT	0	0	FALSE	TRUE	normal
16898432	6.3095	ENST00000516091	VTRNA2-2P	ENSG00000251900	VTRNA2-2P	0	0	FALSE	TRUE	normal
16704690	5.23377	NM_020945	WDFY4	ENSG00000128815	WDFY4	0	0	FALSE	TRUE	normal
16914285	5.37089	NM_172005	WFDC13	ENSG00000168634	WFDC13	0	0	FALSE	TRUE	normal
16919531	5.5871	NM_145652	WFDC5	ENSG00000175121	WFDC5	0	0	FALSE	TRUE	normal
17062127	5.00902	NM_003391	WNT2	ENSG00000105989	WNT2	0	0	FALSE	TRUE	normal
16891101	5.67545	NM_006522	WNT6	ENSG00000115596	WNT6	0	0	FALSE	TRUE	normal
16936044	5.54723	NM_058238	WNT7B	ENSG00000188064	WNT7B	0	0	FALSE	TRUE	normal
16700147	6.67884	NM_003395	WNT9A	ENSG00000143816	WNT9A	0	0	FALSE	TRUE	normal
16723283	5.02844	NR_120547	WT1-AS	ENSG00000183242	WT1-AS	0	0	FALSE	TRUE	normal
16843873	3.82913	NR_024178	YWHAEP7	ENSG00000276715	YWHAEP7	0	0	FALSE	TRUE	normal
17053325	5.7187	NM_138434	ZBED6CL	ENSG00000188707	ZBED6CL	0	0	FALSE	TRUE	normal
16944231	3.13404	ENST00000478301	ZBTB20-AS2	ENSG00000241295	ZBTB20-AS2	0	0	FALSE	TRUE	normal
16963275	5.98984	NM_001039617	ZDHHC19	ENSG00000163958	ZDHHC19	0	0	FALSE	TRUE	normal
16795065	4.84485	NM_174976	ZDHHC22	ENSG00000177108	ZDHHC22	0	0	FALSE	TRUE	normal
17116765	2.4731	ENST00000417305	ZFY-AS1	ENSG00000233070	ZFY-AS1	0	0	FALSE	FALSE	normal
16829858	6.46341	NM_001136046	ZMYND15	ENSG00000141497	ZMYND15	0	0	FALSE	TRUE	normal
16918466	6.03991	NR_110623	ZNF341-AS1	ENSG00000230753	ZNF341-AS1	0	0	FALSE	TRUE	normal
16997097	5.07342	ENST00000318442	ZNF366	ENSG00000178175	ZNF366	0	0	FALSE	TRUE	normal
16906031	3.85851	NM_152520	ZNF385B	ENSG00000144331	ZNF385B	0	0	FALSE	TRUE	normal
16938315	3.04369	ENST00000448980	ZNF385D-AS2	ENSG00000223351	ZNF385D-AS2	0	0	FALSE	TRUE	normal
16993311	5.08254	NM_001178089	ZNF454	ENSG00000178187	ZNF454	0	0	FALSE	TRUE	normal
17064210	5.60293	NM_207336	ZNF467	ENSG00000181444	ZNF467	0	0	FALSE	TRUE	normal
16865917	4.46023	NM_020813	ZNF471	ENSG00000196263	ZNF471	0	0	FALSE	TRUE	normal
17046426	3.17305	NM_153363	ZNF679	ENSG00000197123	ZNF679	0	0	FALSE	TRUE	normal
16870759	4.1666	uc002nop.3	ZNF682	ENSG00000197124	ZNF682	0	0	FALSE	TRUE	normal
16875140	4.44331	NR_003578	ZNF702P	ENSG00000242779	ZNF702P	0	0	FALSE	TRUE	normal
17046339	4.43878	NM_001159279	ZNF716	ENSG00000182111	ZNF716	0	0	FALSE	TRUE	normal
17121976	2.24925	ENST00000600766	ZNF723	ENSG00000268696	ZNF723P	0	0	FALSE	FALSE	normal
17121990	2.02704	NM_001277403	ZNF730	ENSG00000183850	ZNF730	0	0	FALSE	FALSE	normal
16973296	3.65325	NM_001137608	ZNF732	ENSG00000186777	ZNF732	0	0	FALSE	TRUE	normal
17058083	4.21682	NR_003952	ZNF733P	ENSG00000185037	ZNF733P	0	0	FALSE	TRUE	normal
16871839	3.69054	NM_152605	ZNF781	ENSG00000196381	ZNF781	0	0	FALSE	TRUE	normal
16861563	4.53549	NM_001013659	ZNF793	ENSG00000188227	ZNF793	0	0	FALSE	TRUE	normal
16860273	4.8533	ENST00000594711	ZNF849P	ENSG00000198153	ZNF849P	0	0	FALSE	TRUE	normal
16870879	2.46133	NM_001080409	ZNF99	ENSG00000213973	ZNF99	0	0	FALSE	FALSE	normal
16700989	4.37972	NM_021186	ZP4	ENSG00000116996	ZP4	0	0	FALSE	TRUE	normal
16833903	4.38931	NM_198844	ZPBP2	ENSG00000186075	ZPBP2	0	0	FALSE	TRUE	normal
16865860	4.38285	ENST00000534327	ZSCAN5C	ENSG00000204532	ZSCAN5CP	0	0	FALSE	TRUE	normal
NA	NA	NA	NA	ENSG00000223972	DDX11L1	0	0	FALSE	NA	normal
NA	NA	NA	NA	ENSG00000278267	MIR6859-1	0	0	FALSE	NA	normal
NA	NA	NA	NA	ENSG00000243485	RP11-34P13.3	0	0	FALSE	NA	normal
NA	NA	NA	NA	ENSG00000240361	OR4G11P	0	0	FALSE	NA	normal
NA	NA	NA	NA	ENSG00000238009	RP11-34P13.7	0	0	FALSE	NA	normal
NA	NA	NA	NA	ENSG00000236679	RPL23AP24	0	0	FALSE	NA	normal
NA	NA	NA	NA	ENSG00000230021	RP5-857K21.4	0	0	FALSE	NA	normal
NA	NA	NA	NA	ENSG00000230699	RP11-54O7.1	0	0	FALSE	NA	normal
NA	NA	NA	NA	ENSG00000223764	RP11-54O7.3	0	0	FALSE	NA	normal
NA	NA	NA	NA	ENSG00000272512	RP11-54O7.17	0	0	FALSE	NA	normal
NA	NA	NA	NA	ENSG00000231702	RP11-54O7.10	0	0	FALSE	NA	normal
NA	NA	NA	NA	ENSG00000184163	FAM132A	0	0	FALSE	NA	normal
NA	NA	NA	NA	ENSG00000234396	RP11-181G12.4	0	0	FALSE	NA	normal
NA	NA	NA	NA	ENSG00000149527	PLCH2	0	0	FALSE	NA	normal
NA	NA	NA	NA	ENSG00000237058	RP13-436F16.1	0	0	FALSE	NA	normal
NA	NA	NA	NA	ENSG00000177133	LINC00982	0	0	FALSE	NA	normal
NA	NA	NA	NA	ENSG00000279839	RP11-193J6.1	0	0	FALSE	NA	normal
NA	NA	NA	NA	ENSG00000272235	RP11-22L13.1	0	0	FALSE	NA	normal
NA	NA	NA	NA	ENSG00000272088	RP11-168F9.2	0	0	FALSE	NA	normal
NA	NA	NA	NA	ENSG00000227589	RP5-1092A11.5	0	0	FALSE	NA	normal
NA	NA	NA	NA	ENSG00000235131	RP5-1092A11.2	0	0	FALSE	NA	normal
NA	NA	NA	NA	ENSG00000233304	LINC01346	0	0	FALSE	NA	normal
NA	NA	NA	NA	ENSG00000237728	RP3-453P22.2	0	0	FALSE	NA	normal
NA	NA	NA	NA	ENSG00000225126	RP4-549F15.1	0	0	FALSE	NA	normal
NA	NA	NA	NA	ENSG00000270171	RP11-338N10.1	0	0	FALSE	NA	normal
NA	NA	NA	NA	ENSG00000270035	RP11-338N10.2	0	0	FALSE	NA	normal
NA	NA	NA	NA	ENSG00000269978	RP11-338N10.3	0	0	FALSE	NA	normal
NA	NA	NA	NA	ENSG00000232848	CTA-215D11.4	0	0	FALSE	NA	normal
NA	NA	NA	NA	ENSG00000221083	SNORA77	0	0	FALSE	NA	normal
NA	NA	NA	NA	ENSG00000226545	RP4-633I8.3	0	0	FALSE	NA	normal
NA	NA	NA	NA	ENSG00000232208	RP3-477M7.5	0	0	FALSE	NA	normal
NA	NA	NA	NA	ENSG00000179840	PIK3CD-AS1	0	0	FALSE	NA	normal
NA	NA	NA	NA	ENSG00000280113	AL357140.1	0	0	FALSE	NA	normal
NA	NA	NA	NA	ENSG00000271989	RP4-736L20.3	0	0	FALSE	NA	normal
NA	NA	NA	NA	ENSG00000204624	PTCHD2	0	0	FALSE	NA	normal
NA	NA	NA	NA	ENSG00000235643	RP1-69M21.2	0	0	FALSE	NA	normal
NA	NA	NA	NA	ENSG00000270914	RP5-1077B9.5	0	0	FALSE	NA	normal
NA	NA	NA	NA	ENSG00000280999	AC243836.1	0	0	FALSE	NA	normal
NA	NA	NA	NA	ENSG00000229484	RP5-888M10.2	0	0	FALSE	NA	normal
NA	NA	NA	NA	ENSG00000277058	HNRNPCL3	0	0	FALSE	NA	normal
NA	NA	NA	NA	ENSG00000252417	RNU7-179P	0	0	FALSE	NA	normal
NA	NA	NA	NA	ENSG00000178715	RP11-169K16.8	0	0	FALSE	NA	normal
NA	NA	NA	NA	ENSG00000232456	RP11-5P18.10	0	0	FALSE	NA	normal
NA	NA	NA	NA	ENSG00000233929	MT1XP1	0	0	FALSE	NA	normal
NA	NA	NA	NA	ENSG00000224174	RP4-798A10.4	0	0	FALSE	NA	normal
NA	NA	NA	NA	ENSG00000204362	RP11-380J14.1	0	0	FALSE	NA	normal
NA	NA	NA	NA	ENSG00000280226	AC004824.2	0	0	FALSE	NA	normal
NA	NA	NA	NA	ENSG00000235282	DYNLL1P3	0	0	FALSE	NA	normal
NA	NA	NA	NA	ENSG00000255275	RP13-279N23.2	0	0	FALSE	NA	normal
NA	NA	NA	NA	ENSG00000235432	RP5-930J4.5	0	0	FALSE	NA	normal
NA	NA	NA	NA	ENSG00000236216	PPP1R11P1	0	0	FALSE	NA	normal
NA	NA	NA	NA	ENSG00000232037	RP11-26H16.1	0	0	FALSE	NA	normal
NA	NA	NA	NA	ENSG00000234397	RP11-415K20.1	0	0	FALSE	NA	normal
NA	NA	NA	NA	ENSG00000229106	BTBD6P1	0	0	FALSE	NA	normal
NA	NA	NA	NA	ENSG00000230228	RP11-4M23.4	0	0	FALSE	NA	normal
NA	NA	NA	NA	ENSG00000259984	RP11-335G20.7	0	0	FALSE	NA	normal
NA	NA	NA	NA	ENSG00000207302	Y_RNA	0	0	FALSE	NA	normal
NA	NA	NA	NA	ENSG00000236155	RP11-231P20.2	0	0	FALSE	NA	normal
NA	NA	NA	NA	ENSG00000241188	RN7SL165P	0	0	FALSE	NA	normal
NA	NA	NA	NA	ENSG00000243659	RP11-4K3__A.3	0	0	FALSE	NA	normal
NA	NA	NA	NA	ENSG00000271398	RP5-1092A3.5	0	0	FALSE	NA	normal
NA	NA	NA	NA	ENSG00000252777	SCARNA24	0	0	FALSE	NA	normal
NA	NA	NA	NA	ENSG00000277958	Metazoa_SRP	0	0	FALSE	NA	normal
NA	NA	NA	NA	ENSG00000225142	RP11-490K7.1	0	0	FALSE	NA	normal
NA	NA	NA	NA	ENSG00000223907	LINC01226	0	0	FALSE	NA	normal
NA	NA	NA	NA	ENSG00000264078	RP11-73M7.9	0	0	FALSE	NA	normal
NA	NA	NA	NA	ENSG00000266203	MIR5585	0	0	FALSE	NA	normal
NA	NA	NA	NA	ENSG00000270850	RP11-395N6.4	0	0	FALSE	NA	normal
NA	NA	NA	NA	ENSG00000229259	LRRC37A12P	0	0	FALSE	NA	normal
NA	NA	NA	NA	ENSG00000235907	RP4-580O19.2	0	0	FALSE	NA	normal
NA	NA	NA	NA	ENSG00000243749	ZMYM6NB	0	0	FALSE	NA	normal
NA	NA	NA	NA	ENSG00000201868	Y_RNA	0	0	FALSE	NA	normal
NA	NA	NA	NA	ENSG00000201542	SNORA62	0	0	FALSE	NA	normal
NA	NA	NA	NA	ENSG00000271164	RP4-789D17.4	0	0	FALSE	NA	normal
NA	NA	NA	NA	ENSG00000278491	AL360074.1	0	0	FALSE	NA	normal
NA	NA	NA	NA	ENSG00000235673	RP11-109P14.8	0	0	FALSE	NA	normal
NA	NA	NA	NA	ENSG00000224592	RP5-884C9.2	0	0	FALSE	NA	normal
NA	NA	NA	NA	ENSG00000223589	RP5-884C9.3	0	0	FALSE	NA	normal
NA	NA	NA	NA	ENSG00000274944	RP5-864K19.6	0	0	FALSE	NA	normal
NA	NA	NA	NA	ENSG00000236546	RP1-118J21.5	0	0	FALSE	NA	normal
NA	NA	NA	NA	ENSG00000227311	RP1-228H13.1	0	0	FALSE	NA	normal
NA	NA	NA	NA	ENSG00000279667	RP11-656D10.7	0	0	FALSE	NA	normal
NA	NA	NA	NA	ENSG00000235358	RP11-399E6.1	0	0	FALSE	NA	normal
NA	NA	NA	NA	ENSG00000213987	RP11-399E6.2	0	0	FALSE	NA	normal
NA	NA	NA	NA	ENSG00000264896	AL451006.1	0	0	FALSE	NA	normal
NA	NA	NA	NA	ENSG00000235002	RP11-157D18.2	0	0	FALSE	NA	normal
NA	NA	NA	NA	ENSG00000230116	RP11-163G10.2	0	0	FALSE	NA	normal
NA	NA	NA	NA	ENSG00000236180	RP11-163G10.4	0	0	FALSE	NA	normal
NA	NA	NA	NA	ENSG00000274386	RP5-994D16.11	0	0	FALSE	NA	normal
NA	NA	NA	NA	ENSG00000229372	SZT2-AS1	0	0	FALSE	NA	normal
NA	NA	NA	NA	ENSG00000271329	RP5-891H21.5	0	0	FALSE	NA	normal
NA	NA	NA	NA	ENSG00000266294	AL136380.1	0	0	FALSE	NA	normal
NA	NA	NA	NA	ENSG00000232369	RP5-882O7.4	0	0	FALSE	NA	normal
NA	NA	NA	NA	ENSG00000234315	OSTCP5	0	0	FALSE	NA	normal
NA	NA	NA	NA	ENSG00000236111	RP11-630I5.1	0	0	FALSE	NA	normal
NA	NA	NA	NA	ENSG00000281129	AL672043.1	0	0	FALSE	NA	normal
NA	NA	NA	NA	ENSG00000225779	RP4-603I14.3	0	0	FALSE	NA	normal
NA	NA	NA	NA	ENSG00000225514	MTND1P34	0	0	FALSE	NA	normal
NA	NA	NA	NA	ENSG00000242267	SKINTL	0	0	FALSE	NA	normal
NA	NA	NA	NA	ENSG00000272491	RP5-1024N4.4	0	0	FALSE	NA	normal
NA	NA	NA	NA	ENSG00000203356	LINC01562	0	0	FALSE	NA	normal
NA	NA	NA	NA	ENSG00000236434	RP11-296A18.6	0	0	FALSE	NA	normal
NA	NA	NA	NA	ENSG00000227070	RP11-191G24.1	0	0	FALSE	NA	normal
NA	NA	NA	NA	ENSG00000212624	SNORA26	0	0	FALSE	NA	normal
NA	NA	NA	NA	ENSG00000224255	PDCL3P6	0	0	FALSE	NA	normal
NA	NA	NA	NA	ENSG00000213735	ANAPC10P1	0	0	FALSE	NA	normal
NA	NA	NA	NA	ENSG00000272371	RP11-25O10.2	0	0	FALSE	NA	normal
NA	NA	NA	NA	ENSG00000236290	EEF1GP7	0	0	FALSE	NA	normal
NA	NA	NA	NA	ENSG00000242391	RP4-631H13.2	0	0	FALSE	NA	normal
NA	NA	NA	NA	ENSG00000231866	RP4-631H13.4	0	0	FALSE	NA	normal
NA	NA	NA	NA	ENSG00000236360	RP11-334A14.2	0	0	FALSE	NA	normal
NA	NA	NA	NA	ENSG00000162383	SLC1A7	0	0	FALSE	NA	normal
NA	NA	NA	NA	ENSG00000235563	RP11-334A14.8	0	0	FALSE	NA	normal
NA	NA	NA	NA	ENSG00000256407	RP11-446E24.4	0	0	FALSE	NA	normal
NA	NA	NA	NA	ENSG00000271723	MROH7-TTC4	0	0	FALSE	NA	normal
NA	NA	NA	NA	ENSG00000162398	LEXM	0	0	FALSE	NA	normal
NA	NA	NA	NA	ENSG00000231090	RP11-101C11.1	0	0	FALSE	NA	normal
NA	NA	NA	NA	ENSG00000231095	GYG1P3	0	0	FALSE	NA	normal
NA	NA	NA	NA	ENSG00000232198	RP4-633H17.2	0	0	FALSE	NA	normal
NA	NA	NA	NA	ENSG00000229871	RPSAP20	0	0	FALSE	NA	normal
NA	NA	NA	NA	ENSG00000236776	RPL21P23	0	0	FALSE	NA	normal
NA	NA	NA	NA	ENSG00000173406	DAB1	0	0	FALSE	NA	normal
NA	NA	NA	NA	ENSG00000226759	DAB1-AS1	0	0	FALSE	NA	normal
NA	NA	NA	NA	ENSG00000229887	HNRNPA1P6	0	0	FALSE	NA	normal
NA	NA	NA	NA	ENSG00000264081	AL136985.1	0	0	FALSE	NA	normal
NA	NA	NA	NA	ENSG00000226476	RP11-776H12.1	0	0	FALSE	NA	normal
NA	NA	NA	NA	ENSG00000223920	RP11-430G17.1	0	0	FALSE	NA	normal
NA	NA	NA	NA	ENSG00000236646	LAMTOR5P1	0	0	FALSE	NA	normal
NA	NA	NA	NA	ENSG00000242860	RN7SL180P	0	0	FALSE	NA	normal
NA	NA	NA	NA	ENSG00000270549	RP11-293K19.1	0	0	FALSE	NA	normal
NA	NA	NA	NA	ENSG00000223683	RPSAP65	0	0	FALSE	NA	normal
NA	NA	NA	NA	ENSG00000234784	RP11-182I10.1	0	0	FALSE	NA	normal
NA	NA	NA	NA	ENSG00000212257	RNU6-1176P	0	0	FALSE	NA	normal
NA	NA	NA	NA	ENSG00000234496	MRPS21P1	0	0	FALSE	NA	normal
NA	NA	NA	NA	ENSG00000234144	COX6CP13	0	0	FALSE	NA	normal
NA	NA	NA	NA	ENSG00000224570	RP11-430H12.2	0	0	FALSE	NA	normal
NA	NA	NA	NA	ENSG00000227466	RP11-397C12.1	0	0	FALSE	NA	normal
NA	NA	NA	NA	ENSG00000275678	RP4-547N15.3	0	0	FALSE	NA	normal
NA	NA	NA	NA	ENSG00000235200	RP11-393N21.2	0	0	FALSE	NA	normal
NA	NA	NA	NA	ENSG00000238139	RP11-393N21.1	0	0	FALSE	NA	normal
NA	NA	NA	NA	ENSG00000235055	RP4-609E1.2	0	0	FALSE	NA	normal
NA	NA	NA	NA	ENSG00000263542	AL157407.1	0	0	FALSE	NA	normal
NA	NA	NA	NA	ENSG00000237622	TCEB1P18	0	0	FALSE	NA	normal
NA	NA	NA	NA	ENSG00000229440	RP5-1033K19.2	0	0	FALSE	NA	normal
NA	NA	NA	NA	ENSG00000226088	RP11-180O5.2	0	0	FALSE	NA	normal
NA	NA	NA	NA	ENSG00000227207	RPL31P12	0	0	FALSE	NA	normal
NA	NA	NA	NA	ENSG00000227016	RP11-262K1.1	0	0	FALSE	NA	normal
NA	NA	NA	NA	ENSG00000116783	TNNI3K	0	0	FALSE	NA	normal
NA	NA	NA	NA	ENSG00000225605	RP11-550H2.1	0	0	FALSE	NA	normal
NA	NA	NA	NA	ENSG00000238015	RP4-641G12.3	0	0	FALSE	NA	normal
NA	NA	NA	NA	ENSG00000235400	RP4-641G12.4	0	0	FALSE	NA	normal
NA	NA	NA	NA	ENSG00000213559	HNRNPA1P64	0	0	FALSE	NA	normal
NA	NA	NA	NA	ENSG00000231364	RP11-413G15.1	0	0	FALSE	NA	normal
NA	NA	NA	NA	ENSG00000266671	AL450063.1	0	0	FALSE	NA	normal
NA	NA	NA	NA	ENSG00000232622	RP11-484D4.3	0	0	FALSE	NA	normal
NA	NA	NA	NA	ENSG00000273264	RP11-131L23.2	0	0	FALSE	NA	normal
NA	NA	NA	NA	ENSG00000280842	AL121989.1	0	0	FALSE	NA	normal
NA	NA	NA	NA	ENSG00000232393	RPL5P6	0	0	FALSE	NA	normal
NA	NA	NA	NA	ENSG00000229067	RP11-91I11.1	0	0	FALSE	NA	normal
NA	NA	NA	NA	ENSG00000239794	RN7SL653P	0	0	FALSE	NA	normal
NA	NA	NA	NA	ENSG00000233228	LPCAT2BP	0	0	FALSE	NA	normal
NA	NA	NA	NA	ENSG00000224678	GAPDHP46	0	0	FALSE	NA	normal
NA	NA	NA	NA	ENSG00000207022	SNORA51	0	0	FALSE	NA	normal
NA	NA	NA	NA	ENSG00000226128	RPL26P9	0	0	FALSE	NA	normal
NA	NA	NA	NA	ENSG00000230718	RP11-272L13.2	0	0	FALSE	NA	normal
NA	NA	NA	NA	ENSG00000270911	RP11-272L13.4	0	0	FALSE	NA	normal
NA	NA	NA	NA	ENSG00000269998	RP11-272L13.3	0	0	FALSE	NA	normal
NA	NA	NA	NA	ENSG00000259946	RP11-490G2.2	0	0	FALSE	NA	normal
NA	NA	NA	NA	ENSG00000225206	MIR137HG	0	0	FALSE	NA	normal
NA	NA	NA	NA	ENSG00000280040	RP11-296E3.2	0	0	FALSE	NA	normal
NA	NA	NA	NA	ENSG00000117598	PLPPR5	0	0	FALSE	NA	normal
NA	NA	NA	NA	ENSG00000271415	RPL23AP90	0	0	FALSE	NA	normal
NA	NA	NA	NA	ENSG00000225169	BRI3P1	0	0	FALSE	NA	normal
NA	NA	NA	NA	ENSG00000215871	RP5-837M10.1	0	0	FALSE	NA	normal
NA	NA	NA	NA	ENSG00000228399	RP4-575N6.2	0	0	FALSE	NA	normal
NA	NA	NA	NA	ENSG00000234257	SOD2P1	0	0	FALSE	NA	normal
NA	NA	NA	NA	ENSG00000230759	RP11-153F1.2	0	0	FALSE	NA	normal
NA	NA	NA	NA	ENSG00000224613	RP11-153F1.1	0	0	FALSE	NA	normal
NA	NA	NA	NA	ENSG00000228347	FTLP17	0	0	FALSE	NA	normal
NA	NA	NA	NA	ENSG00000226822	RP11-356N1.2	0	0	FALSE	NA	normal
NA	NA	NA	NA	ENSG00000280186	RP11-483I13.6	0	0	FALSE	NA	normal
NA	NA	NA	NA	ENSG00000186086	NBPF6	0	0	FALSE	NA	normal
NA	NA	NA	NA	ENSG00000243967	NBPF5P	0	0	FALSE	NA	normal
NA	NA	NA	NA	ENSG00000238118	SLC25A24P2	0	0	FALSE	NA	normal
NA	NA	NA	NA	ENSG00000237349	RP5-1065J22.2	0	0	FALSE	NA	normal
NA	NA	NA	NA	ENSG00000228054	RANP5	0	0	FALSE	NA	normal
NA	NA	NA	NA	ENSG00000224927	NDUFA5P10	0	0	FALSE	NA	normal
NA	NA	NA	NA	ENSG00000224965	KCNC4-AS1	0	0	FALSE	NA	normal
NA	NA	NA	NA	ENSG00000282852	RP5-1003J2.4	0	0	FALSE	NA	normal
NA	NA	NA	NA	ENSG00000235407	RP11-470L19.2	0	0	FALSE	NA	normal
NA	NA	NA	NA	ENSG00000203878	CHIAP2	0	0	FALSE	NA	normal
NA	NA	NA	NA	ENSG00000234020	CHIAP3	0	0	FALSE	NA	normal
NA	NA	NA	NA	ENSG00000227811	FAM212B-AS1	0	0	FALSE	NA	normal
NA	NA	NA	NA	ENSG00000231437	RP11-88H9.2	0	0	FALSE	NA	normal
NA	NA	NA	NA	ENSG00000271810	RP11-426L16.10	0	0	FALSE	NA	normal
NA	NA	NA	NA	ENSG00000261595	RP11-426L16.9	0	0	FALSE	NA	normal
NA	NA	NA	NA	ENSG00000233839	RP11-389O22.4	0	0	FALSE	NA	normal
NA	NA	NA	NA	ENSG00000238256	MTND5P20	0	0	FALSE	NA	normal
NA	NA	NA	NA	ENSG00000264419	MIR548AC	0	0	FALSE	NA	normal
NA	NA	NA	NA	ENSG00000232780	GAPDHP74	0	0	FALSE	NA	normal
NA	NA	NA	NA	ENSG00000203858	HSD3BP2	0	0	FALSE	NA	normal
NA	NA	NA	NA	ENSG00000274642	CH17-472G23.1	0	0	FALSE	NA	normal
NA	NA	NA	NA	ENSG00000281741	AC241377.2	0	0	FALSE	NA	normal
NA	NA	NA	NA	ENSG00000275585	CH17-118O6.3	0	0	FALSE	NA	normal
NA	NA	NA	NA	ENSG00000198019	FCGR1B	0	0	FALSE	NA	normal
NA	NA	NA	NA	ENSG00000234998	RP11-439A17.10	0	0	FALSE	NA	normal
NA	NA	NA	NA	ENSG00000233029	RP11-439A17.9	0	0	FALSE	NA	normal
NA	NA	NA	NA	ENSG00000227193	RP11-439A17.4	0	0	FALSE	NA	normal
NA	NA	NA	NA	ENSG00000274366	AC244021.1	0	0	FALSE	NA	normal
NA	NA	NA	NA	ENSG00000272583	RP11-344P13.6	0	0	FALSE	NA	normal
NA	NA	NA	NA	ENSG00000224857	RP11-344P13.1	0	0	FALSE	NA	normal
NA	NA	NA	NA	ENSG00000223779	RP11-403I13.4	0	0	FALSE	NA	normal
NA	NA	NA	NA	ENSG00000240929	HIST2H2BB	0	0	FALSE	NA	normal
NA	NA	NA	NA	ENSG00000234571	RP5-998N21.4	0	0	FALSE	NA	normal
NA	NA	NA	NA	ENSG00000230186	RP5-998N21.7	0	0	FALSE	NA	normal
NA	NA	NA	NA	ENSG00000277199	CH17-125A10.2	0	0	FALSE	NA	normal
NA	NA	NA	NA	ENSG00000277678	U1	0	0	FALSE	NA	normal
NA	NA	NA	NA	ENSG00000244619	RP11-315I20.3	0	0	FALSE	NA	normal
NA	NA	NA	NA	ENSG00000213240	RP11-458D21.5	0	0	FALSE	NA	normal
NA	NA	NA	NA	ENSG00000276509	CH17-353B19.1	0	0	FALSE	NA	normal
NA	NA	NA	NA	ENSG00000270339	AC243756.1	0	0	FALSE	NA	normal
NA	NA	NA	NA	ENSG00000272443	OR13Z2P	0	0	FALSE	NA	normal
NA	NA	NA	NA	ENSG00000232265	XXyac-YX155B6.5	0	0	FALSE	NA	normal
NA	NA	NA	NA	ENSG00000252744	Y_RNA	0	0	FALSE	NA	normal
NA	NA	NA	NA	ENSG00000275140	CH17-478G19.2	0	0	FALSE	NA	normal
NA	NA	NA	NA	ENSG00000272755	RP11-326G21.1	0	0	FALSE	NA	normal
NA	NA	NA	NA	ENSG00000274423	RP11-544O24.2	0	0	FALSE	NA	normal
NA	NA	NA	NA	ENSG00000275557	RP11-353N4.6	0	0	FALSE	NA	normal
NA	NA	NA	NA	ENSG00000264553	MIR4257	0	0	FALSE	NA	normal
NA	NA	NA	NA	ENSG00000276103	U4	0	0	FALSE	NA	normal
NA	NA	NA	NA	ENSG00000206931	RNU6-1042P	0	0	FALSE	NA	normal
NA	NA	NA	NA	ENSG00000229357	CYCSP51	0	0	FALSE	NA	normal
NA	NA	NA	NA	ENSG00000232536	RP11-74C1.4	0	0	FALSE	NA	normal
NA	NA	NA	NA	ENSG00000249602	RP11-98D18.3	0	0	FALSE	NA	normal
NA	NA	NA	NA	ENSG00000268288	RP11-98D18.16	0	0	FALSE	NA	normal
NA	NA	NA	NA	ENSG00000269489	RP11-98D18.17	0	0	FALSE	NA	normal
NA	NA	NA	NA	ENSG00000229021	AL591893.1	0	0	FALSE	NA	normal
NA	NA	NA	NA	ENSG00000199565	Y_RNA	0	0	FALSE	NA	normal
NA	NA	NA	NA	ENSG00000207039	Y_RNA	0	0	FALSE	NA	normal
NA	NA	NA	NA	ENSG00000228013	RP11-350G8.5	0	0	FALSE	NA	normal
NA	NA	NA	NA	ENSG00000223503	RP11-29H23.6	0	0	FALSE	NA	normal
NA	NA	NA	NA	ENSG00000224276	RP11-336K24.5	0	0	FALSE	NA	normal
NA	NA	NA	NA	ENSG00000242252	BGLAP	0	0	FALSE	NA	normal
NA	NA	NA	NA	ENSG00000272971	RP11-284F21.11	0	0	FALSE	NA	normal
NA	NA	NA	NA	ENSG00000227295	ELL2P1	0	0	FALSE	NA	normal
NA	NA	NA	NA	ENSG00000265589	AL359753.1	0	0	FALSE	NA	normal
NA	NA	NA	NA	ENSG00000224943	RP11-180D21.3	0	0	FALSE	NA	normal
NA	NA	NA	NA	ENSG00000223603	CRPP1	0	0	FALSE	NA	normal
NA	NA	NA	NA	ENSG00000256029	RP11-190A12.7	0	0	FALSE	NA	normal
NA	NA	NA	NA	ENSG00000279430	RP11-190A12.9	0	0	FALSE	NA	normal
NA	NA	NA	NA	ENSG00000273933	RP11-48O20.5	0	0	FALSE	NA	normal
NA	NA	NA	NA	ENSG00000198358	RP11-544M22.1	0	0	FALSE	NA	normal
NA	NA	NA	NA	ENSG00000228917	RP11-544M22.8	0	0	FALSE	NA	normal
NA	NA	NA	NA	ENSG00000238934	ACA64	0	0	FALSE	NA	normal
NA	NA	NA	NA	ENSG00000277882	RP11-122G18.9	0	0	FALSE	NA	normal
NA	NA	NA	NA	ENSG00000171722	C1orf111	0	0	FALSE	NA	normal
NA	NA	NA	NA	ENSG00000243173	RN7SL861P	0	0	FALSE	NA	normal
NA	NA	NA	NA	ENSG00000185860	CCDC190	0	0	FALSE	NA	normal
NA	NA	NA	NA	ENSG00000225755	RP11-267N12.2	0	0	FALSE	NA	normal
NA	NA	NA	NA	ENSG00000269887	RP11-477H21.2	0	0	FALSE	NA	normal
NA	NA	NA	NA	ENSG00000230659	RP11-466F5.9	0	0	FALSE	NA	normal
NA	NA	NA	NA	ENSG00000226292	RP11-7G12.1	0	0	FALSE	NA	normal
NA	NA	NA	NA	ENSG00000273160	RP11-104L21.3	0	0	FALSE	NA	normal
NA	NA	NA	NA	ENSG00000250762	RP1-313L4.4	0	0	FALSE	NA	normal
NA	NA	NA	NA	ENSG00000228697	RP5-968D22.1	0	0	FALSE	NA	normal
NA	NA	NA	NA	ENSG00000237658	RP5-968D22.3	0	0	FALSE	NA	normal
NA	NA	NA	NA	ENSG00000243051	RN7SL269P	0	0	FALSE	NA	normal
NA	NA	NA	NA	ENSG00000235378	MRPS10P1	0	0	FALSE	NA	normal
NA	NA	NA	NA	ENSG00000201126	RNU6-773P	0	0	FALSE	NA	normal
NA	NA	NA	NA	ENSG00000276381	Z98750.1	0	0	FALSE	NA	normal
NA	NA	NA	NA	ENSG00000232261	RP4-560B9.5	0	0	FALSE	NA	normal
NA	NA	NA	NA	ENSG00000230630	DNM3OS	0	0	FALSE	NA	normal
NA	NA	NA	NA	ENSG00000232751	RP11-296O14.1	0	0	FALSE	NA	normal
NA	NA	NA	NA	ENSG00000224977	RP11-160H22.3	0	0	FALSE	NA	normal
NA	NA	NA	NA	ENSG00000227373	RP11-160H22.5	0	0	FALSE	NA	normal
NA	NA	NA	NA	ENSG00000237317	RP4-809F4.1	0	0	FALSE	NA	normal
NA	NA	NA	NA	ENSG00000234041	RP11-345I18.1	0	0	FALSE	NA	normal
NA	NA	NA	NA	ENSG00000201619	SNORA67	0	0	FALSE	NA	normal
NA	NA	NA	NA	ENSG00000223794	COX5BP8	0	0	FALSE	NA	normal
NA	NA	NA	NA	ENSG00000261250	RP11-545A16.1	0	0	FALSE	NA	normal
NA	NA	NA	NA	ENSG00000281572	U6	0	0	FALSE	NA	normal
NA	NA	NA	NA	ENSG00000231684	EIF1P3	0	0	FALSE	NA	normal
NA	NA	NA	NA	ENSG00000207472	RNU6-41P	0	0	FALSE	NA	normal
NA	NA	NA	NA	ENSG00000265042	AL137800.1	0	0	FALSE	NA	normal
NA	NA	NA	NA	ENSG00000252612	Y_RNA	0	0	FALSE	NA	normal
NA	NA	NA	NA	ENSG00000261729	GS1-204I12.4	0	0	FALSE	NA	normal
NA	NA	NA	NA	ENSG00000229739	RP11-295K2.3	0	0	FALSE	NA	normal
NA	NA	NA	NA	ENSG00000233196	GS1-304P7.1	0	0	FALSE	NA	normal
NA	NA	NA	NA	ENSG00000273129	PACERR	0	0	FALSE	NA	normal
NA	NA	NA	NA	ENSG00000235083	RP11-669M2.2	0	0	FALSE	NA	normal
NA	NA	NA	NA	ENSG00000236792	RP11-142L4.2	0	0	FALSE	NA	normal
NA	NA	NA	NA	ENSG00000232498	RP5-1011O1.2	0	0	FALSE	NA	normal
NA	NA	NA	NA	ENSG00000234871	LINC01032	0	0	FALSE	NA	normal
NA	NA	NA	NA	ENSG00000273093	RP11-532L16.3	0	0	FALSE	NA	normal
NA	NA	NA	NA	ENSG00000260088	RP11-92G12.3	0	0	FALSE	NA	normal
NA	NA	NA	NA	ENSG00000282221	RP11-27G14.4	0	0	FALSE	NA	normal
NA	NA	NA	NA	ENSG00000223774	RP11-307B6.3	0	0	FALSE	NA	normal
NA	NA	NA	NA	ENSG00000229120	CYCSP4	0	0	FALSE	NA	normal
NA	NA	NA	NA	ENSG00000232626	RP11-175B9.2	0	0	FALSE	NA	normal
NA	NA	NA	NA	ENSG00000260021	RP11-480I12.10	0	0	FALSE	NA	normal
NA	NA	NA	NA	ENSG00000184774	MGAT4EP	0	0	FALSE	NA	normal
NA	NA	NA	NA	ENSG00000236523	NPM1P40	0	0	FALSE	NA	normal
NA	NA	NA	NA	ENSG00000230550	RP11-74C13.3	0	0	FALSE	NA	normal
NA	NA	NA	NA	ENSG00000237848	RP11-739N20.3	0	0	FALSE	NA	normal
NA	NA	NA	NA	ENSG00000224717	RP11-576D8.4	0	0	FALSE	NA	normal
NA	NA	NA	NA	ENSG00000229509	RP11-421E17.4	0	0	FALSE	NA	normal
NA	NA	NA	NA	ENSG00000199349	Y_RNA	0	0	FALSE	NA	normal
NA	NA	NA	NA	ENSG00000227591	RP1-28O10.1	0	0	FALSE	NA	normal
NA	NA	NA	NA	ENSG00000236136	ADORA2BP1	0	0	FALSE	NA	normal
NA	NA	NA	NA	ENSG00000270936	RP5-879K22.1	0	0	FALSE	NA	normal
NA	NA	NA	NA	ENSG00000224763	FDPSP8	0	0	FALSE	NA	normal
NA	NA	NA	NA	ENSG00000212205	Y_RNA	0	0	FALSE	NA	normal
NA	NA	NA	NA	ENSG00000212044	AL360091.1	0	0	FALSE	NA	normal
NA	NA	NA	NA	ENSG00000235862	RP11-338C15.5	0	0	FALSE	NA	normal
NA	NA	NA	NA	ENSG00000232809	VDAC1P10	0	0	FALSE	NA	normal
NA	NA	NA	NA	ENSG00000202498	SNORD116	0	0	FALSE	NA	normal
NA	NA	NA	NA	ENSG00000233620	RP11-22M7.2	0	0	FALSE	NA	normal
NA	NA	NA	NA	ENSG00000236292	RP5-1099E6.3	0	0	FALSE	NA	normal
NA	NA	NA	NA	ENSG00000228247	UBBP2	0	0	FALSE	NA	normal
NA	NA	NA	NA	ENSG00000223375	RP11-224O19.5	0	0	FALSE	NA	normal
NA	NA	NA	NA	ENSG00000230024	RP11-95P13.1	0	0	FALSE	NA	normal
NA	NA	NA	NA	ENSG00000281745	AC096643.1	0	0	FALSE	NA	normal
NA	NA	NA	NA	ENSG00000233012	HDAC1P2	0	0	FALSE	NA	normal
NA	NA	NA	NA	ENSG00000228437	RP11-400N13.2	0	0	FALSE	NA	normal
NA	NA	NA	NA	ENSG00000264972	AC092765.1	0	0	FALSE	NA	normal
NA	NA	NA	NA	ENSG00000278610	RP11-455P21.3	0	0	FALSE	NA	normal
NA	NA	NA	NA	ENSG00000234523	NDUFB1P2	0	0	FALSE	NA	normal
NA	NA	NA	NA	ENSG00000233771	CICP5	0	0	FALSE	NA	normal
NA	NA	NA	NA	ENSG00000229930	RP11-504P24.5	0	0	FALSE	NA	normal
NA	NA	NA	NA	ENSG00000232628	RP11-365O16.3	0	0	FALSE	NA	normal
NA	NA	NA	NA	ENSG00000237101	RP11-365O16.6	0	0	FALSE	NA	normal
NA	NA	NA	NA	ENSG00000225334	RP11-449J1.1	0	0	FALSE	NA	normal
NA	NA	NA	NA	ENSG00000272562	RP11-396C23.4	0	0	FALSE	NA	normal
NA	NA	NA	NA	ENSG00000275406	RP11-125A15.3	0	0	FALSE	NA	normal
NA	NA	NA	NA	ENSG00000177770	CDKN2AIPNLP1	0	0	FALSE	NA	normal
NA	NA	NA	NA	ENSG00000236636	RP11-211A18.1	0	0	FALSE	NA	normal
NA	NA	NA	NA	ENSG00000232864	NUCKS1P1	0	0	FALSE	NA	normal
NA	NA	NA	NA	ENSG00000225934	RP4-566D2.1	0	0	FALSE	NA	normal
NA	NA	NA	NA	ENSG00000269934	RP5-1139B12.3	0	0	FALSE	NA	normal
NA	NA	NA	NA	ENSG00000270110	RP5-1139B12.4	0	0	FALSE	NA	normal
NA	NA	NA	NA	ENSG00000270104	RP11-245P10.6	0	0	FALSE	NA	normal
NA	NA	NA	NA	ENSG00000168148	HIST3H3	0	0	FALSE	NA	normal
NA	NA	NA	NA	ENSG00000230841	RPL23AP15	0	0	FALSE	NA	normal
NA	NA	NA	NA	ENSG00000223635	RP4-613A2.1	0	0	FALSE	NA	normal
NA	NA	NA	NA	ENSG00000229367	HMGN2P19	0	0	FALSE	NA	normal
NA	NA	NA	NA	ENSG00000213028	RP11-108F13.2	0	0	FALSE	NA	normal
NA	NA	NA	NA	ENSG00000225984	HMGB1P26	0	0	FALSE	NA	normal
NA	NA	NA	NA	ENSG00000240502	RN7SL837P	0	0	FALSE	NA	normal
NA	NA	NA	NA	ENSG00000270106	TSNAX-DISC1	0	0	FALSE	NA	normal
NA	NA	NA	NA	ENSG00000236497	RP11-66A2.2	0	0	FALSE	NA	normal
NA	NA	NA	NA	ENSG00000212144	U8	0	0	FALSE	NA	normal
NA	NA	NA	NA	ENSG00000233018	RP4-597N16.1	0	0	FALSE	NA	normal
NA	NA	NA	NA	ENSG00000270710	RP11-293G6__B.8	0	0	FALSE	NA	normal
NA	NA	NA	NA	ENSG00000227236	RP11-365D9.1	0	0	FALSE	NA	normal
NA	NA	NA	NA	ENSG00000229291	RP4-580N22.2	0	0	FALSE	NA	normal
NA	NA	NA	NA	ENSG00000235371	RP4-764D2.1	0	0	FALSE	NA	normal
NA	NA	NA	NA	ENSG00000270188	MTRNR2L11	0	0	FALSE	NA	normal
NA	NA	NA	NA	ENSG00000215805	RP11-438O11.1	0	0	FALSE	NA	normal
NA	NA	NA	NA	ENSG00000223694	ADH5P3	0	0	FALSE	NA	normal
NA	NA	NA	NA	ENSG00000230015	RP11-80B9.4	0	0	FALSE	NA	normal
NA	NA	NA	NA	ENSG00000223963	PRKRIRP8	0	0	FALSE	NA	normal
NA	NA	NA	NA	ENSG00000238085	RP11-435F13.2	0	0	FALSE	NA	normal
NA	NA	NA	NA	ENSG00000213026	CFL1P4	0	0	FALSE	NA	normal
NA	NA	NA	NA	ENSG00000226828	RP11-278H7.1	0	0	FALSE	NA	normal
NA	NA	NA	NA	ENSG00000238952	AC099757.1	0	0	FALSE	NA	normal
NA	NA	NA	NA	ENSG00000252282	RNU6-1089P	0	0	FALSE	NA	normal
NA	NA	NA	NA	ENSG00000232192	RP11-62I21.1	0	0	FALSE	NA	normal
NA	NA	NA	NA	ENSG00000207326	Y_RNA	0	0	FALSE	NA	normal
NA	NA	NA	NA	ENSG00000224014	RP11-488L18.6	0	0	FALSE	NA	normal
NA	NA	NA	NA	ENSG00000215795	RP11-488L18.3	0	0	FALSE	NA	normal
NA	NA	NA	NA	ENSG00000214144	RP11-488L18.1	0	0	FALSE	NA	normal
NA	NA	NA	NA	ENSG00000202079	Y_RNA	0	0	FALSE	NA	normal
NA	NA	NA	NA	ENSG00000198452	OR14L1P	0	0	FALSE	NA	normal
NA	NA	NA	NA	ENSG00000230411	OR3D1P	0	0	FALSE	NA	normal
NA	NA	NA	NA	ENSG00000239395	RP11-634B7.5	0	0	FALSE	NA	normal
NA	NA	NA	NA	ENSG00000241128	OR14A2	0	0	FALSE	NA	normal
NA	NA	NA	NA	ENSG00000224830	OR2X1P	0	0	FALSE	NA	normal
NA	NA	NA	NA	ENSG00000237492	OR2L9P	0	0	FALSE	NA	normal
NA	NA	NA	NA	ENSG00000232215	OR2L6P	0	0	FALSE	NA	normal
NA	NA	NA	NA	ENSG00000276520	WI2-2118C23.2	0	0	FALSE	NA	normal
NA	NA	NA	NA	ENSG00000259823	LYPD8	0	0	FALSE	NA	normal
NA	NA	NA	NA	ENSG00000227363	AC019172.2	0	0	FALSE	NA	normal
NA	NA	NA	NA	ENSG00000232044	LINC01105	0	0	FALSE	NA	normal
NA	NA	NA	NA	ENSG00000220999	AC017076.1	0	0	FALSE	NA	normal
NA	NA	NA	NA	ENSG00000213774	AC010904.1	0	0	FALSE	NA	normal
NA	NA	NA	NA	ENSG00000207086	Y_RNA	0	0	FALSE	NA	normal
NA	NA	NA	NA	ENSG00000271787	RP11-254F7.3	0	0	FALSE	NA	normal
NA	NA	NA	NA	ENSG00000212558	SNORA26	0	0	FALSE	NA	normal
NA	NA	NA	NA	ENSG00000206898	SNORA51	0	0	FALSE	NA	normal
NA	NA	NA	NA	ENSG00000217258	AC007249.3	0	0	FALSE	NA	normal
NA	NA	NA	NA	ENSG00000223850	MYCNUT	0	0	FALSE	NA	normal
NA	NA	NA	NA	ENSG00000279663	RP11-542H15.1	0	0	FALSE	NA	normal
NA	NA	NA	NA	ENSG00000236348	PSMC1P10	0	0	FALSE	NA	normal
NA	NA	NA	NA	ENSG00000238111	AC066692.3	0	0	FALSE	NA	normal
NA	NA	NA	NA	ENSG00000243847	RN7SL610P	0	0	FALSE	NA	normal
NA	NA	NA	NA	ENSG00000276087	RP11-507M3.1	0	0	FALSE	NA	normal
NA	NA	NA	NA	ENSG00000232963	HMGN2P20	0	0	FALSE	NA	normal
NA	NA	NA	NA	ENSG00000202479	SNORD14	0	0	FALSE	NA	normal
NA	NA	NA	NA	ENSG00000276653	RN7SL856P	0	0	FALSE	NA	normal
NA	NA	NA	NA	ENSG00000237629	UQCRHP2	0	0	FALSE	NA	normal
NA	NA	NA	NA	ENSG00000233438	AC109829.1	0	0	FALSE	NA	normal
NA	NA	NA	NA	ENSG00000205334	LINC01460	0	0	FALSE	NA	normal
NA	NA	NA	NA	ENSG00000270640	RP11-373D23.2	0	0	FALSE	NA	normal
NA	NA	NA	NA	ENSG00000270210	RP11-373D23.3	0	0	FALSE	NA	normal
NA	NA	NA	NA	ENSG00000242699	RN7SL516P	0	0	FALSE	NA	normal
NA	NA	NA	NA	ENSG00000242272	AK2P2	0	0	FALSE	NA	normal
NA	NA	NA	NA	ENSG00000274159	AL133243.3	0	0	FALSE	NA	normal
NA	NA	NA	NA	ENSG00000223951	AL133244.1	0	0	FALSE	NA	normal
NA	NA	NA	NA	ENSG00000266861	AC097506.1	0	0	FALSE	NA	normal
NA	NA	NA	NA	ENSG00000281381	U6	0	0	FALSE	NA	normal
NA	NA	NA	NA	ENSG00000213594	GAPDHP25	0	0	FALSE	NA	normal
NA	NA	NA	NA	ENSG00000271443	RP11-541E12.1	0	0	FALSE	NA	normal
NA	NA	NA	NA	ENSG00000233128	AC007317.1	0	0	FALSE	NA	normal
NA	NA	NA	NA	ENSG00000272814	RP11-15I20.1	0	0	FALSE	NA	normal
NA	NA	NA	NA	ENSG00000281003	Metazoa_SRP	0	0	FALSE	NA	normal
NA	NA	NA	NA	ENSG00000242441	GTF2A1L	0	0	FALSE	NA	normal
NA	NA	NA	NA	ENSG00000282890	RP11-460M2.1	0	0	FALSE	NA	normal
NA	NA	NA	NA	ENSG00000204993	AC139712.2	0	0	FALSE	NA	normal
NA	NA	NA	NA	ENSG00000232668	AC010967.1	0	0	FALSE	NA	normal
NA	NA	NA	NA	ENSG00000235937	AC008280.1	0	0	FALSE	NA	normal
NA	NA	NA	NA	ENSG00000231334	AC104781.1	0	0	FALSE	NA	normal
NA	NA	NA	NA	ENSG00000233251	AC007743.1	0	0	FALSE	NA	normal
NA	NA	NA	NA	ENSG00000273063	RP11-334G22.1	0	0	FALSE	NA	normal
NA	NA	NA	NA	ENSG00000226884	AC016727.3	0	0	FALSE	NA	normal
NA	NA	NA	NA	ENSG00000227361	RPS24P7	0	0	FALSE	NA	normal
NA	NA	NA	NA	ENSG00000230702	RP11-681L4.1	0	0	FALSE	NA	normal
NA	NA	NA	NA	ENSG00000277498	RP11-681L4.2	0	0	FALSE	NA	normal
NA	NA	NA	NA	ENSG00000278523	Y_RNA	0	0	FALSE	NA	normal
NA	NA	NA	NA	ENSG00000239958	RN7SL51P	0	0	FALSE	NA	normal
NA	NA	NA	NA	ENSG00000270335	RP11-642D6.1	0	0	FALSE	NA	normal
NA	NA	NA	NA	ENSG00000233702	AC107083.1	0	0	FALSE	NA	normal
NA	NA	NA	NA	ENSG00000281071	AC016734.1	0	0	FALSE	NA	normal
NA	NA	NA	NA	ENSG00000279644	AC008074.1	0	0	FALSE	NA	normal
NA	NA	NA	NA	ENSG00000233694	AC007365.1	0	0	FALSE	NA	normal
NA	NA	NA	NA	ENSG00000227791	AC007365.4	0	0	FALSE	NA	normal
NA	NA	NA	NA	ENSG00000273398	RP11-474G23.1	0	0	FALSE	NA	normal
NA	NA	NA	NA	ENSG00000252250	Y_RNA	0	0	FALSE	NA	normal
NA	NA	NA	NA	ENSG00000281301	AC079121.1	0	0	FALSE	NA	normal
NA	NA	NA	NA	ENSG00000215996	AC017084.1	0	0	FALSE	NA	normal
NA	NA	NA	NA	ENSG00000228034	HMGN2P21	0	0	FALSE	NA	normal
NA	NA	NA	NA	ENSG00000228568	AC006461.2	0	0	FALSE	NA	normal
NA	NA	NA	NA	ENSG00000229798	KRT18P26	0	0	FALSE	NA	normal
NA	NA	NA	NA	ENSG00000263909	MIR5000	0	0	FALSE	NA	normal
NA	NA	NA	NA	ENSG00000238410	snoU109	0	0	FALSE	NA	normal
NA	NA	NA	NA	ENSG00000270996	RP11-342K6.4	0	0	FALSE	NA	normal
NA	NA	NA	NA	ENSG00000237077	AC105399.2	0	0	FALSE	NA	normal
NA	NA	NA	NA	ENSG00000229494	AC012494.1	0	0	FALSE	NA	normal
NA	NA	NA	NA	ENSG00000277171	RP11-191H23.1	0	0	FALSE	NA	normal
NA	NA	NA	NA	ENSG00000230237	AC010975.2	0	0	FALSE	NA	normal
NA	NA	NA	NA	ENSG00000223427	AC016716.1	0	0	FALSE	NA	normal
NA	NA	NA	NA	ENSG00000233444	AC013262.1	0	0	FALSE	NA	normal
NA	NA	NA	NA	ENSG00000260840	RP11-60H5.1	0	0	FALSE	NA	normal
NA	NA	NA	NA	ENSG00000230299	AC093162.3	0	0	FALSE	NA	normal
NA	NA	NA	NA	ENSG00000266931	RP11-1252D15.1	0	0	FALSE	NA	normal
NA	NA	NA	NA	ENSG00000275597	RP11-1378G18.1	0	0	FALSE	NA	normal
NA	NA	NA	NA	ENSG00000235129	FABP7P2	0	0	FALSE	NA	normal
NA	NA	NA	NA	ENSG00000233037	AC009237.10	0	0	FALSE	NA	normal
NA	NA	NA	NA	ENSG00000274206	Metazoa_SRP	0	0	FALSE	NA	normal
NA	NA	NA	NA	ENSG00000275655	RN7SL313P	0	0	FALSE	NA	normal
NA	NA	NA	NA	ENSG00000277701	RP11-734K23.9	0	0	FALSE	NA	normal
NA	NA	NA	NA	ENSG00000235833	AC159540.14	0	0	FALSE	NA	normal
NA	NA	NA	NA	ENSG00000196872	KIAA1211L	0	0	FALSE	NA	normal
NA	NA	NA	NA	ENSG00000273155	RP11-38C17.1	0	0	FALSE	NA	normal
NA	NA	NA	NA	ENSG00000270699	RP11-292K15.1	0	0	FALSE	NA	normal
NA	NA	NA	NA	ENSG00000238029	AC012493.1	0	0	FALSE	NA	normal
NA	NA	NA	NA	ENSG00000227259	HMGN2P22	0	0	FALSE	NA	normal
NA	NA	NA	NA	ENSG00000281681	Metazoa_SRP	0	0	FALSE	NA	normal
NA	NA	NA	NA	ENSG00000264857	MIR5696	0	0	FALSE	NA	normal
NA	NA	NA	NA	ENSG00000277527	AC007251.2	0	0	FALSE	NA	normal
NA	NA	NA	NA	ENSG00000224509	AC010884.1	0	0	FALSE	NA	normal
NA	NA	NA	NA	ENSG00000227513	AC114755.3	0	0	FALSE	NA	normal
NA	NA	NA	NA	ENSG00000235486	AC114755.7	0	0	FALSE	NA	normal
NA	NA	NA	NA	ENSG00000237745	AC009963.5	0	0	FALSE	NA	normal
NA	NA	NA	NA	ENSG00000235325	AC009963.6	0	0	FALSE	NA	normal
NA	NA	NA	NA	ENSG00000231221	LINC01593	0	0	FALSE	NA	normal
NA	NA	NA	NA	ENSG00000227597	WASF1P1	0	0	FALSE	NA	normal
NA	NA	NA	NA	ENSG00000261209	SULT1C2P2	0	0	FALSE	NA	normal
NA	NA	NA	NA	ENSG00000230650	AC112229.1	0	0	FALSE	NA	normal
NA	NA	NA	NA	ENSG00000236330	RPL5P9	0	0	FALSE	NA	normal
NA	NA	NA	NA	ENSG00000280878	RP11-68E19.2	0	0	FALSE	NA	normal
NA	NA	NA	NA	ENSG00000271635	RP11-68E19.1	0	0	FALSE	NA	normal
NA	NA	NA	NA	ENSG00000232277	AC104651.3	0	0	FALSE	NA	normal
NA	NA	NA	NA	ENSG00000221541	AC079753.1	0	0	FALSE	NA	normal
NA	NA	NA	NA	ENSG00000227368	AC079753.5	0	0	FALSE	NA	normal
NA	NA	NA	NA	ENSG00000236878	AC012363.7	0	0	FALSE	NA	normal
NA	NA	NA	NA	ENSG00000227788	AC012363.8	0	0	FALSE	NA	normal
NA	NA	NA	NA	ENSG00000234065	MTND4P26	0	0	FALSE	NA	normal
NA	NA	NA	NA	ENSG00000223549	MTND5P28	0	0	FALSE	NA	normal
NA	NA	NA	NA	ENSG00000271709	RP11-297J22.1	0	0	FALSE	NA	normal
NA	NA	NA	NA	ENSG00000279721	RP11-416H1.2	0	0	FALSE	NA	normal
NA	NA	NA	NA	ENSG00000213239	NPM1P32	0	0	FALSE	NA	normal
NA	NA	NA	NA	ENSG00000201470	RNY4P7	0	0	FALSE	NA	normal
NA	NA	NA	NA	ENSG00000274010	RP5-935K16.2	0	0	FALSE	NA	normal
NA	NA	NA	NA	ENSG00000232101	AC108059.2	0	0	FALSE	NA	normal
NA	NA	NA	NA	ENSG00000229758	DYNLT3P2	0	0	FALSE	NA	normal
NA	NA	NA	NA	ENSG00000231240	KLF2P1	0	0	FALSE	NA	normal
NA	NA	NA	NA	ENSG00000224087	AC018804.3	0	0	FALSE	NA	normal
NA	NA	NA	NA	ENSG00000227632	AC018804.6	0	0	FALSE	NA	normal
NA	NA	NA	NA	ENSG00000234934	MTND5P29	0	0	FALSE	NA	normal
NA	NA	NA	NA	ENSG00000226915	AC068137.13	0	0	FALSE	NA	normal
NA	NA	NA	NA	ENSG00000239402	CYP4F62P	0	0	FALSE	NA	normal
NA	NA	NA	NA	ENSG00000136698	CFC1	0	0	FALSE	NA	normal
NA	NA	NA	NA	ENSG00000230450	NEK2P4	0	0	FALSE	NA	normal
NA	NA	NA	NA	ENSG00000236956	NF1P8	0	0	FALSE	NA	normal
NA	NA	NA	NA	ENSG00000227817	ARHGAP42P1	0	0	FALSE	NA	normal
NA	NA	NA	NA	ENSG00000273073	RP11-109E12.1	0	0	FALSE	NA	normal
NA	NA	NA	NA	ENSG00000226886	AC093787.1	0	0	FALSE	NA	normal
NA	NA	NA	NA	ENSG00000163046	ANKRD30BL	0	0	FALSE	NA	normal
NA	NA	NA	NA	ENSG00000234060	EDDM3CP	0	0	FALSE	NA	normal
NA	NA	NA	NA	ENSG00000279024	RP11-1193F23.1	0	0	FALSE	NA	normal
NA	NA	NA	NA	ENSG00000230037	UBBP1	0	0	FALSE	NA	normal
NA	NA	NA	NA	ENSG00000224231	AC069394.1	0	0	FALSE	NA	normal
NA	NA	NA	NA	ENSG00000229781	AC013444.1	0	0	FALSE	NA	normal
NA	NA	NA	NA	ENSG00000270390	RP11-470B22.1	0	0	FALSE	NA	normal
NA	NA	NA	NA	ENSG00000231758	AC092652.1	0	0	FALSE	NA	normal
NA	NA	NA	NA	ENSG00000232377	AC016910.1	0	0	FALSE	NA	normal
NA	NA	NA	NA	ENSG00000234119	AC079248.1	0	0	FALSE	NA	normal
NA	NA	NA	NA	ENSG00000281772	RP11-567F11.2	0	0	FALSE	NA	normal
NA	NA	NA	NA	ENSG00000212181	SNORA48	0	0	FALSE	NA	normal
NA	NA	NA	NA	ENSG00000224007	AC019070.1	0	0	FALSE	NA	normal
NA	NA	NA	NA	ENSG00000226340	AC105402.3	0	0	FALSE	NA	normal
NA	NA	NA	NA	ENSG00000228236	TXNP5	0	0	FALSE	NA	normal
NA	NA	NA	NA	ENSG00000223604	AC007394.3	0	0	FALSE	NA	normal
NA	NA	NA	NA	ENSG00000162947	AC007364.1	0	0	FALSE	NA	normal
NA	NA	NA	NA	ENSG00000224048	AC104777.4	0	0	FALSE	NA	normal
NA	NA	NA	NA	ENSG00000242113	RN7SL124P	0	0	FALSE	NA	normal
NA	NA	NA	NA	ENSG00000230251	PHBP4	0	0	FALSE	NA	normal
NA	NA	NA	NA	ENSG00000224675	AC009227.2	0	0	FALSE	NA	normal
NA	NA	NA	NA	ENSG00000226383	AC093375.1	0	0	FALSE	NA	normal
NA	NA	NA	NA	ENSG00000282440	RP11-605B16.1	0	0	FALSE	NA	normal
NA	NA	NA	NA	ENSG00000213194	AC016732.2	0	0	FALSE	NA	normal
NA	NA	NA	NA	ENSG00000271320	RP11-1152H14.1	0	0	FALSE	NA	normal
NA	NA	NA	NA	ENSG00000234890	HNRNPDLP2	0	0	FALSE	NA	normal
NA	NA	NA	NA	ENSG00000275141	MIR6888	0	0	FALSE	NA	normal
NA	NA	NA	NA	ENSG00000207117	Y_RNA	0	0	FALSE	NA	normal
NA	NA	NA	NA	ENSG00000225813	AC009299.4	0	0	FALSE	NA	normal
NA	NA	NA	NA	ENSG00000251621	AC009487.5	0	0	FALSE	NA	normal
NA	NA	NA	NA	ENSG00000280105	RP11-334E15.1	0	0	FALSE	NA	normal
NA	NA	NA	NA	ENSG00000231445	TIMM8AP1	0	0	FALSE	NA	normal
NA	NA	NA	NA	ENSG00000236841	AC007750.5	0	0	FALSE	NA	normal
NA	NA	NA	NA	ENSG00000224331	AC019181.3	0	0	FALSE	NA	normal
NA	NA	NA	NA	ENSG00000233255	AC019181.2	0	0	FALSE	NA	normal
NA	NA	NA	NA	ENSG00000214211	CTAGE14P	0	0	FALSE	NA	normal
NA	NA	NA	NA	ENSG00000235335	AC016723.4	0	0	FALSE	NA	normal
NA	NA	NA	NA	ENSG00000214369	AC009967.3	0	0	FALSE	NA	normal
NA	NA	NA	NA	ENSG00000231898	AC012594.1	0	0	FALSE	NA	normal
NA	NA	NA	NA	ENSG00000232555	AC104088.1	0	0	FALSE	NA	normal
NA	NA	NA	NA	ENSG00000231735	RP11-1O7.1	0	0	FALSE	NA	normal
NA	NA	NA	NA	ENSG00000227187	RP11-6C10.1	0	0	FALSE	NA	normal
NA	NA	NA	NA	ENSG00000281719	AC009336.1	0	0	FALSE	NA	normal
NA	NA	NA	NA	ENSG00000272551	RP11-324L17.1	0	0	FALSE	NA	normal
NA	NA	NA	NA	ENSG00000201102	Y_RNA	0	0	FALSE	NA	normal
NA	NA	NA	NA	ENSG00000271825	RP11-337N6.2	0	0	FALSE	NA	normal
NA	NA	NA	NA	ENSG00000249909	CYCTP	0	0	FALSE	NA	normal
NA	NA	NA	NA	ENSG00000270956	RP11-65L3.4	0	0	FALSE	NA	normal
NA	NA	NA	NA	ENSG00000270277	RP11-65L3.2	0	0	FALSE	NA	normal
NA	NA	NA	NA	ENSG00000279598	RP11-65L3.3	0	0	FALSE	NA	normal
NA	NA	NA	NA	ENSG00000271011	RP11-171I2.5	0	0	FALSE	NA	normal
NA	NA	NA	NA	ENSG00000270574	RP11-171I2.2	0	0	FALSE	NA	normal
NA	NA	NA	NA	ENSG00000271141	RP11-171I2.4	0	0	FALSE	NA	normal
NA	NA	NA	NA	ENSG00000271401	RP11-171I2.3	0	0	FALSE	NA	normal
NA	NA	NA	NA	ENSG00000267784	RP11-171I2.1	0	0	FALSE	NA	normal
NA	NA	NA	NA	ENSG00000231541	RPS6P2	0	0	FALSE	NA	normal
NA	NA	NA	NA	ENSG00000231203	KRT8P10	0	0	FALSE	NA	normal
NA	NA	NA	NA	ENSG00000237824	RPL23AP33	0	0	FALSE	NA	normal
NA	NA	NA	NA	ENSG00000225406	AC080125.1	0	0	FALSE	NA	normal
NA	NA	NA	NA	ENSG00000224019	RPL21P32	0	0	FALSE	NA	normal
NA	NA	NA	NA	ENSG00000226553	AC018735.1	0	0	FALSE	NA	normal
NA	NA	NA	NA	ENSG00000231739	GAPDHP59	0	0	FALSE	NA	normal
NA	NA	NA	NA	ENSG00000233996	AC013439.4	0	0	FALSE	NA	normal
NA	NA	NA	NA	ENSG00000223824	AC019178.3	0	0	FALSE	NA	normal
NA	NA	NA	NA	ENSG00000213110	AC019178.2	0	0	FALSE	NA	normal
NA	NA	NA	NA	ENSG00000233766	AC098617.1	0	0	FALSE	NA	normal
NA	NA	NA	NA	ENSG00000213946	DNAJB1P1	0	0	FALSE	NA	normal
NA	NA	NA	NA	ENSG00000224219	AC074290.1	0	0	FALSE	NA	normal
NA	NA	NA	NA	ENSG00000224670	AC068135.1	0	0	FALSE	NA	normal
NA	NA	NA	NA	ENSG00000203435	E2F3P2	0	0	FALSE	NA	normal
NA	NA	NA	NA	ENSG00000227878	AC114760.1	0	0	FALSE	NA	normal
NA	NA	NA	NA	ENSG00000282836	RP11-369J9.1	0	0	FALSE	NA	normal
NA	NA	NA	NA	ENSG00000252923	SCARNA16	0	0	FALSE	NA	normal
NA	NA	NA	NA	ENSG00000280176	RP11-84A12.1	0	0	FALSE	NA	normal
NA	NA	NA	NA	ENSG00000243478	AOX2P	0	0	FALSE	NA	normal
NA	NA	NA	NA	ENSG00000202008	Y_RNA	0	0	FALSE	NA	normal
NA	NA	NA	NA	ENSG00000227736	MTCO3P16	0	0	FALSE	NA	normal
NA	NA	NA	NA	ENSG00000224590	MTND3P16	0	0	FALSE	NA	normal
NA	NA	NA	NA	ENSG00000249177	MTND4P29	0	0	FALSE	NA	normal
NA	NA	NA	NA	ENSG00000273209	RP11-107N15.1	0	0	FALSE	NA	normal
NA	NA	NA	NA	ENSG00000227890	PSMA2P3	0	0	FALSE	NA	normal
NA	NA	NA	NA	ENSG00000264275	RN7SL753P	0	0	FALSE	NA	normal
NA	NA	NA	NA	ENSG00000272966	RP11-686O6.1	0	0	FALSE	NA	normal
NA	NA	NA	NA	ENSG00000232479	AC010900.2	0	0	FALSE	NA	normal
NA	NA	NA	NA	ENSG00000225124	RPL23AP36	0	0	FALSE	NA	normal
NA	NA	NA	NA	ENSG00000213925	NPM1P33	0	0	FALSE	NA	normal
NA	NA	NA	NA	ENSG00000223890	AC008171.1	0	0	FALSE	NA	normal
NA	NA	NA	NA	ENSG00000234491	HNRNPA1P51	0	0	FALSE	NA	normal
NA	NA	NA	NA	ENSG00000234902	AC007879.2	0	0	FALSE	NA	normal
NA	NA	NA	NA	ENSG00000213081	AC012362.3	0	0	FALSE	NA	normal
NA	NA	NA	NA	ENSG00000231294	AC006994.2	0	0	FALSE	NA	normal
NA	NA	NA	NA	ENSG00000236007	AC105921.5	0	0	FALSE	NA	normal
NA	NA	NA	NA	ENSG00000225166	AC012462.2	0	0	FALSE	NA	normal
NA	NA	NA	NA	ENSG00000235444	PSMB3P2	0	0	FALSE	NA	normal
NA	NA	NA	NA	ENSG00000224414	AC010886.2	0	0	FALSE	NA	normal
NA	NA	NA	NA	ENSG00000231035	RPL7L1P9	0	0	FALSE	NA	normal
NA	NA	NA	NA	ENSG00000275458	MIR6809	0	0	FALSE	NA	normal
NA	NA	NA	NA	ENSG00000223923	AC010136.2	0	0	FALSE	NA	normal
NA	NA	NA	NA	ENSG00000224159	HMGB1P9	0	0	FALSE	NA	normal
NA	NA	NA	NA	ENSG00000228135	LINC01494	0	0	FALSE	NA	normal
NA	NA	NA	NA	ENSG00000224928	KRT8P30	0	0	FALSE	NA	normal
NA	NA	NA	NA	ENSG00000268603	RP11-316O14.1	0	0	FALSE	NA	normal
NA	NA	NA	NA	ENSG00000221432	AC079834.2	0	0	FALSE	NA	normal
NA	NA	NA	NA	ENSG00000226726	TMEM256P2	0	0	FALSE	NA	normal
NA	NA	NA	NA	ENSG00000234446	AC068489.1	0	0	FALSE	NA	normal
NA	NA	NA	NA	ENSG00000267034	RP11-384O8.1	0	0	FALSE	NA	normal
NA	NA	NA	NA	ENSG00000203531	AC016712.1	0	0	FALSE	NA	normal
NA	NA	NA	NA	ENSG00000235225	AC016712.2	0	0	FALSE	NA	normal
NA	NA	NA	NA	ENSG00000224826	AC019109.1	0	0	FALSE	NA	normal
NA	NA	NA	NA	ENSG00000261379	RP11-395N3.1	0	0	FALSE	NA	normal
NA	NA	NA	NA	ENSG00000212391	SNORA48	0	0	FALSE	NA	normal
NA	NA	NA	NA	ENSG00000229172	AC073065.3	0	0	FALSE	NA	normal
NA	NA	NA	NA	ENSG00000183514	TDGF1P2	0	0	FALSE	NA	normal
NA	NA	NA	NA	ENSG00000235993	AC007559.1	0	0	FALSE	NA	normal
NA	NA	NA	NA	ENSG00000243650	RN7SL834P	0	0	FALSE	NA	normal
NA	NA	NA	NA	ENSG00000250011	HMGB1P3	0	0	FALSE	NA	normal
NA	NA	NA	NA	ENSG00000261829	RP11-223I10.1	0	0	FALSE	NA	normal
NA	NA	NA	NA	ENSG00000172799	ZBTB8OSP2	0	0	FALSE	NA	normal
NA	NA	NA	NA	ENSG00000231494	AC104634.3	0	0	FALSE	NA	normal
NA	NA	NA	NA	ENSG00000251485	AC068134.10	0	0	FALSE	NA	normal
NA	NA	NA	NA	ENSG00000230122	ECEL1P3	0	0	FALSE	NA	normal
NA	NA	NA	NA	ENSG00000259793	RP11-400N9.1	0	0	FALSE	NA	normal
NA	NA	NA	NA	ENSG00000241119	UGT1A9	0	0	FALSE	NA	normal
NA	NA	NA	NA	ENSG00000167165	UGT1A6	0	0	FALSE	NA	normal
NA	NA	NA	NA	ENSG00000264676	RN7SL204P	0	0	FALSE	NA	normal
NA	NA	NA	NA	ENSG00000270540	RP11-785G17.1	0	0	FALSE	NA	normal
NA	NA	NA	NA	ENSG00000232893	IQCA1-AS1	0	0	FALSE	NA	normal
NA	NA	NA	NA	ENSG00000277842	MIR6811	0	0	FALSE	NA	normal
NA	NA	NA	NA	ENSG00000186235	AC016757.3	0	0	FALSE	NA	normal
NA	NA	NA	NA	ENSG00000264103	AC017028.2	0	0	FALSE	NA	normal
NA	NA	NA	NA	ENSG00000265416	AC017028.6	0	0	FALSE	NA	normal
NA	NA	NA	NA	ENSG00000220256	AC093802.1	0	0	FALSE	NA	normal
NA	NA	NA	NA	ENSG00000219159	AC011298.2	0	0	FALSE	NA	normal
NA	NA	NA	NA	ENSG00000233392	AC104809.4	0	0	FALSE	NA	normal
NA	NA	NA	NA	ENSG00000225521	AC005237.4	0	0	FALSE	NA	normal
NA	NA	NA	NA	ENSG00000263752	MIR3133	0	0	FALSE	NA	normal
NA	NA	NA	NA	ENSG00000224272	AC114730.3	0	0	FALSE	NA	normal
NA	NA	NA	NA	ENSG00000216921	AC131097.4	0	0	FALSE	NA	normal
NA	NA	NA	NA	ENSG00000234325	MRPS10P2	0	0	FALSE	NA	normal
NA	NA	NA	NA	ENSG00000275981	EGOT	0	0	FALSE	NA	normal
NA	NA	NA	NA	ENSG00000281217	AC018816.1	0	0	FALSE	NA	normal
NA	NA	NA	NA	ENSG00000281863	SNORA43	0	0	FALSE	NA	normal
NA	NA	NA	NA	ENSG00000235830	SRGAP3-AS4	0	0	FALSE	NA	normal
NA	NA	NA	NA	ENSG00000214041	PGAM1P4	0	0	FALSE	NA	normal
NA	NA	NA	NA	ENSG00000250151	ARPC4-TTLL3	0	0	FALSE	NA	normal
NA	NA	NA	NA	ENSG00000269886	RP11-266J6.2	0	0	FALSE	NA	normal
NA	NA	NA	NA	ENSG00000213964	CHCHD4P4	0	0	FALSE	NA	normal
NA	NA	NA	NA	ENSG00000225026	AC091492.2	0	0	FALSE	NA	normal
NA	NA	NA	NA	ENSG00000274514	Metazoa_SRP	0	0	FALSE	NA	normal
NA	NA	NA	NA	ENSG00000180438	TPRXL	0	0	FALSE	NA	normal
NA	NA	NA	NA	ENSG00000230524	COL6A4P1	0	0	FALSE	NA	normal
NA	NA	NA	NA	ENSG00000226427	HMGN2P7	0	0	FALSE	NA	normal
NA	NA	NA	NA	ENSG00000231780	AC090960.1	0	0	FALSE	NA	normal
NA	NA	NA	NA	ENSG00000271841	RNU7-10P	0	0	FALSE	NA	normal
NA	NA	NA	NA	ENSG00000214286	PDCL3P3	0	0	FALSE	NA	normal
NA	NA	NA	NA	ENSG00000272477	RP11-158G18.1	0	0	FALSE	NA	normal
NA	NA	NA	NA	ENSG00000230697	SAP18P3	0	0	FALSE	NA	normal
NA	NA	NA	NA	ENSG00000280519	SNORA32	0	0	FALSE	NA	normal
NA	NA	NA	NA	ENSG00000228171	AC121251.1	0	0	FALSE	NA	normal
NA	NA	NA	NA	ENSG00000221506	AC092038.1	0	0	FALSE	NA	normal
NA	NA	NA	NA	ENSG00000264219	MIR4442	0	0	FALSE	NA	normal
NA	NA	NA	NA	ENSG00000224237	MINOS1P3	0	0	FALSE	NA	normal
NA	NA	NA	NA	ENSG00000230807	AC099535.4	0	0	FALSE	NA	normal
NA	NA	NA	NA	ENSG00000225548	AC098973.2	0	0	FALSE	NA	normal
NA	NA	NA	NA	ENSG00000230480	AC093142.2	0	0	FALSE	NA	normal
NA	NA	NA	NA	ENSG00000228214	LINC00693	0	0	FALSE	NA	normal
NA	NA	NA	NA	ENSG00000226216	RPS12P5	0	0	FALSE	NA	normal
NA	NA	NA	NA	ENSG00000227795	MTND4LP9	0	0	FALSE	NA	normal
NA	NA	NA	NA	ENSG00000281372	AC108485.1	0	0	FALSE	NA	normal
[truncated: 3,367 more rows]
