# Supplementary material for: Loss of Gene Information: Discrepancies between RNA Sequencing, cDNA Microarray, and qRT-PCR
Source: Int J Mol Sci. 2021 Aug 28;22(17):9349. doi: 10.3390/ijms22179349 (PMC8430810; doi:10.3390/ijms22179349)
Supplement: Supplementary file 1 [file ijms-22-09349-s001.zip › Supplementary_Table_S4.xlsx]

## Sheet: Tabelle
Probe Set ID	A674_01_Mel Ho_log2 Signal	A674_02_501 Mel_log2 Signal	A674_03_A375_log2 Signal	Gene Accession	Gene Symbol	Gene Description	Cytoband	mRNA Accession	mRNA Source	mRna - Description	mRNA Assignment Score	mRNA Assignment Coverage	mRNA - Direct Probes	mRNA - Possible Probes	mRNA - xhyb	UniGene ID	UniGene Expression Information	Chromosome	Strand	Start	Stop	SwissProt mRna Accession	SwissProt accession	GO Biological Process ID	GO Biological Process Term	GO Biological Process Evidence	GO Cellular Component ID	GO Cellular Component Term	GO Cellular Component Evidence	GO Molecular Function ID	GO Molecular Function Term	GO Molecular Function Evidence	Pathway Source	Pathway Name	Protein Domains - Source	Protein Domains - Accession or domain name	Protein Domains - Description	transcript_cluster_id	total_probes	crosshyb_type	category
7892501					---	---	---	---	---	pos_control																													4		normgene->exon
7892502					---	---	---	---	---	neg_control																													4		normgene->intron
7892503					---	---	---	---	---	neg_control																													4		normgene->intron
7892504					---	---	---	---	---	neg_control																													4		normgene->intron
7892505					---	---	---	---	---	neg_control																													4		normgene->intron
7892506					---	---	---	---	---	neg_control																													4		normgene->intron
7892507					---	---	---	---	---	neg_control																													4		normgene->intron
7892508					---	---	---	---	---	neg_control																													4		normgene->intron
7892509					---	---	---	---	---	pos_control																													4		normgene->exon
7892510					---	---	---	---	---	neg_control																													4		normgene->intron
7892511					---	---	---	---	---	neg_control																													4		normgene->intron
7892512					---	---	---	---	---	neg_control																													4		normgene->intron
7892513					---	---	---	---	---	neg_control																													4		normgene->intron
7892514					---	---	---	---	---	pos_control																													4		normgene->exon
7892515					---	---	---	---	---	neg_control																													4		normgene->intron
7892516					---	---	---	---	---	pos_control																													4		normgene->exon
7892517					---	---	---	---	---	neg_control																													4		normgene->intron
7892518					---	---	---	---	---	neg_control																													4		normgene->intron
7892519					---	---	---	---	---	neg_control																													4		normgene->intron
7892520					---	---	---	---	---	neg_control																													4		normgene->intron
7892521					---	---	---	---	---	pos_control																													4		normgene->exon
7892522					---	---	---	---	---	neg_control																													4		normgene->intron
7892524					---	---	---	---	---	neg_control																													4		normgene->intron
7892525					---	---	---	---	---	neg_control																													4		normgene->intron
7892526					---	---	---	---	---	neg_control																													4		normgene->intron
7892527					---	---	---	---	---	neg_control																													4		normgene->intron
7892528					---	---	---	---	---	neg_control																													4		normgene->intron
7892529					---	---	---	---	---	neg_control																													4		normgene->intron
7892530					---	---	---	---	---	pos_control																													4		normgene->exon
7892531					---	---	---	---	---	neg_control																													4		normgene->intron
7892532					---	---	---	---	---	neg_control																													4		normgene->intron
7892533					---	---	---	---	---	neg_control																													3		normgene->intron
7892534					---	---	---	---	---	neg_control																													4		normgene->intron
7892535					---	---	---	---	---	neg_control																													1		normgene->intron
7892536					---	---	---	---	---	pos_control																													4		normgene->exon
7892537					---	---	---	---	---	neg_control																													4		normgene->intron
7892538					---	---	---	---	---	neg_control																													4		normgene->intron
7892539					---	---	---	---	---	neg_control																													4		normgene->intron
7892540					---	---	---	---	---	neg_control																													2		normgene->intron
7892541					---	---	---	---	---	pos_control																													4		normgene->exon
7892542					---	---	---	---	---	pos_control																													4		normgene->exon
7892543					---	---	---	---	---	neg_control																													4		normgene->intron
7892544					---	---	---	---	---	neg_control																													4		normgene->intron
7892545					---	---	---	---	---	neg_control																													4		normgene->intron
7892547					---	---	---	---	---	neg_control																													4		normgene->intron
7892548					---	---	---	---	---	pos_control																													4		normgene->exon
7892549					---	---	---	---	---	pos_control																													4		normgene->exon
7892550					---	---	---	---	---	neg_control																													4		normgene->intron
7892551					---	---	---	---	---	neg_control																													4		normgene->intron
7892552					---	---	---	---	---	neg_control																													4		normgene->intron
7892553					---	---	---	---	---	neg_control																													4		normgene->intron
7892554					---	---	---	---	---	neg_control																													4		normgene->intron
7892555					---	---	---	---	---	pos_control																													4		normgene->exon
7892556					---	---	---	---	---	pos_control																													4		normgene->exon
7892557					---	---	---	---	---	neg_control																													4		normgene->intron
7892558					---	---	---	---	---	neg_control																													4		normgene->intron
7892559					---	---	---	---	---	pos_control																													4		normgene->exon
7892560					---	---	---	---	---	neg_control																													4		normgene->intron
7892561					---	---	---	---	---	pos_control																													4		normgene->exon
7892562					---	---	---	---	---	pos_control																													4		normgene->exon
7892563					---	---	---	---	---	neg_control																													4		normgene->intron
7892564					---	---	---	---	---	pos_control																													4		normgene->exon
7892565					---	---	---	---	---	pos_control																													4		normgene->exon
7892566					---	---	---	---	---	neg_control																													4		normgene->intron
7892567					---	---	---	---	---	neg_control																													4		normgene->intron
7892568					---	---	---	---	---	pos_control																													4		normgene->exon
7892569					---	---	---	---	---	pos_control																													4		normgene->exon
7892570					---	---	---	---	---	neg_control																													4		normgene->intron
7892571					---	---	---	---	---	neg_control																													4		normgene->intron
7892572					---	---	---	---	---	neg_control																													1		normgene->intron
7892573					---	---	---	---	---	neg_control																													4		normgene->intron
7892574					---	---	---	---	---	pos_control																													4		normgene->exon
7892575					---	---	---	---	---	neg_control																													4		normgene->intron
7892576					---	---	---	---	---	pos_control																													4		normgene->exon
7892577					---	---	---	---	---	neg_control																													4		normgene->intron
7892578					---	---	---	---	---	pos_control																													4		normgene->exon
7892579					---	---	---	---	---	pos_control																													4		normgene->exon
7892580					---	---	---	---	---	neg_control																													4		normgene->intron
7892581					---	---	---	---	---	neg_control																													4		normgene->intron
7892582					---	---	---	---	---	neg_control																													4		normgene->intron
7892583					---	---	---	---	---	neg_control																													4		normgene->intron
7892584					---	---	---	---	---	neg_control																													4		normgene->intron
7892585					---	---	---	---	---	neg_control																													4		normgene->intron
7892586					---	---	---	---	---	neg_control																													4		normgene->intron
7892587					---	---	---	---	---	neg_control																													4		normgene->intron
7892588					---	---	---	---	---	neg_control																													4		normgene->intron
7892589					---	---	---	---	---	neg_control																													2		normgene->intron
7892590					---	---	---	---	---	neg_control																													2		normgene->intron
7892591					---	---	---	---	---	neg_control																													4		normgene->intron
7892592					---	---	---	---	---	neg_control																													4		normgene->intron
7892593					---	---	---	---	---	neg_control																													4		normgene->intron
7892594					---	---	---	---	---	neg_control																													4		normgene->intron
7892595					---	---	---	---	---	neg_control																													4		normgene->intron
7892596					---	---	---	---	---	pos_control																													4		normgene->exon
7892597					---	---	---	---	---	neg_control																													4		normgene->intron
7892598					---	---	---	---	---	pos_control																													4		normgene->exon
7892599					---	---	---	---	---	pos_control																													4		normgene->exon
7892600					---	---	---	---	---	neg_control																													4		normgene->intron
7892601					---	---	---	---	---	---																													470		control->bgp->antigenomic
7892602					---	---	---	---	---	neg_control																													4		normgene->intron
7892603					---	---	---	---	---	neg_control																													4		normgene->intron
7892604					---	---	---	---	---	neg_control																													4		normgene->intron
7892605					---	---	---	---	---	pos_control																													3		normgene->exon
7892606					---	---	---	---	---	neg_control																													4		normgene->intron
7892608					---	---	---	---	---	neg_control																													4		normgene->intron
7892609					---	---	---	---	---	pos_control																													1		normgene->exon
7892610					---	---	---	---	---	pos_control																													4		normgene->exon
7892611					---	---	---	---	---	neg_control																													4		normgene->intron
7892612					---	---	---	---	---	neg_control																													4		normgene->intron
7892613					---	---	---	---	---	neg_control																													4		normgene->intron
7892614					---	---	---	---	---	neg_control																													4		normgene->intron
7892615					---	---	---	---	---	neg_control																													4		normgene->intron
7892616					---	---	---	---	---	neg_control																													4		normgene->intron
7892617					---	---	---	---	---	neg_control																													3		normgene->intron
7892618					---	---	---	---	---	pos_control																													4		normgene->exon
7892619					---	---	---	---	---	neg_control																													4		normgene->intron
7892620					---	---	---	---	---	pos_control																													4		normgene->exon
7892621					---	---	---	---	---	pos_control																													4		normgene->exon
7892622					---	---	---	---	---	pos_control																													4		normgene->exon
7892623					---	---	---	---	---	pos_control																													4		normgene->exon
7892624					---	---	---	---	---	neg_control																													4		normgene->intron
7892625					---	---	---	---	---	pos_control																													4		normgene->exon
7892626					---	---	---	---	---	neg_control																													4		normgene->intron
7892627					---	---	---	---	---	pos_control																													4		normgene->exon
7892628					---	---	---	---	---	pos_control																													3		normgene->exon
7892629					---	---	---	---	---	neg_control																													4		normgene->intron
7892630					---	---	---	---	---	pos_control																													4		normgene->exon
7892631					---	---	---	---	---	neg_control																													4		normgene->intron
7892632					---	---	---	---	---	neg_control																													4		normgene->intron
7892633					---	---	---	---	---	neg_control																													4		normgene->intron
7892634					---	---	---	---	---	neg_control																													4		normgene->intron
7892635					---	---	---	---	---	pos_control																													4		normgene->exon
7892636					---	---	---	---	---	neg_control																													4		normgene->intron
7892637					---	---	---	---	---	neg_control																													4		normgene->intron
7892638					---	---	---	---	---	neg_control																													4		normgene->intron
7892639					---	---	---	---	---	pos_control																													2		normgene->exon
7892640					---	---	---	---	---	pos_control																													4		normgene->exon
7892641					---	---	---	---	---	neg_control																													4		normgene->intron
7892642					---	---	---	---	---	neg_control																													4		normgene->intron
7892643					---	---	---	---	---	pos_control																													4		normgene->exon
7892644					---	---	---	---	---	pos_control																													4		normgene->exon
7892645					---	---	---	---	---	neg_control																													4		normgene->intron
7892646					---	---	---	---	---	neg_control																													4		normgene->intron
7892647					---	---	---	---	---	neg_control																													4		normgene->intron
7892648					---	---	---	---	---	pos_control																													4		normgene->exon
7892649					---	---	---	---	---	neg_control																													4		normgene->intron
7892650					---	---	---	---	---	pos_control																													4		normgene->exon
7892651					---	---	---	---	---	neg_control																													4		normgene->intron
7892652					---	---	---	---	---	pos_control																													4		normgene->exon
7892653					---	---	---	---	---	neg_control																													4		normgene->intron
7892654					---	---	---	---	---	neg_control																													4		normgene->intron
7892655					---	---	---	---	---	neg_control																													4		normgene->intron
7892656					---	---	---	---	---	neg_control																													4		normgene->intron
7892657					---	---	---	---	---	neg_control																													4		normgene->intron
7892658					---	---	---	---	---	neg_control																													4		normgene->intron
7892659					---	---	---	---	---	neg_control																													4		normgene->intron
7892660					---	---	---	---	---	neg_control																													1		normgene->intron
7892661					---	---	---	---	---	pos_control																													4		normgene->exon
7892662					---	---	---	---	---	pos_control																													4		normgene->exon
7892663					---	---	---	---	---	pos_control																													4		normgene->exon
7892664					---	---	---	---	---	neg_control																													4		normgene->intron
7892665					---	---	---	---	---	neg_control																													4		normgene->intron
7892666					---	---	---	---	---	neg_control																													4		normgene->intron
7892667					---	---	---	---	---	neg_control																													4		normgene->intron
7892668					---	---	---	---	---	pos_control																													1		normgene->exon
7892669					---	---	---	---	---	neg_control																													4		normgene->intron
7892670					---	---	---	---	---	pos_control																													4		normgene->exon
7892671					---	---	---	---	---	neg_control																													4		normgene->intron
7892672					---	---	---	---	---	neg_control																													4		normgene->intron
7892673					---	---	---	---	---	neg_control																													4		normgene->intron
7892674					---	---	---	---	---	pos_control																													4		normgene->exon
7892675					---	---	---	---	---	neg_control																													2		normgene->intron
7892676					---	---	---	---	---	neg_control																													4		normgene->intron
7892677					---	---	---	---	---	neg_control																													4		normgene->intron
7892678					---	---	---	---	---	pos_control																													4		normgene->exon
7892679					---	---	---	---	---	pos_control																													4		normgene->exon
7892680					---	---	---	---	---	pos_control																													4		normgene->exon
7892681					---	---	---	---	---	neg_control																													4		normgene->intron
7892682					---	---	---	---	---	pos_control																													4		normgene->exon
7892683					---	---	---	---	---	neg_control																													4		normgene->intron
7892684					---	---	---	---	---	pos_control																													3		normgene->exon
7892685					---	---	---	---	---	neg_control																													4		normgene->intron
7892686					---	---	---	---	---	neg_control																													4		normgene->intron
7892687					---	---	---	---	---	pos_control																													4		normgene->exon
7892688					---	---	---	---	---	pos_control																													4		normgene->exon
7892689					---	---	---	---	---	neg_control																													4		normgene->intron
7892690					---	---	---	---	---	neg_control																													4		normgene->intron
7892691					---	---	---	---	---	neg_control																													4		normgene->intron
7892692					---	---	---	---	---	neg_control																													4		normgene->intron
7892693					---	---	---	---	---	neg_control																													3		normgene->intron
7892694					---	---	---	---	---	pos_control																													4		normgene->exon
7892695					---	---	---	---	---	neg_control																													4		normgene->intron
7892696					---	---	---	---	---	neg_control																													4		normgene->intron
7892697					---	---	---	---	---	pos_control																													4		normgene->exon
7892698					---	---	---	---	---	---																													162		control->bgp->antigenomic
7892699					---	---	---	---	---	pos_control																													4		normgene->exon
7892700					---	---	---	---	---	neg_control																													4		normgene->intron
7892701					---	---	---	---	---	pos_control																													4		normgene->exon
7892702					---	---	---	---	---	neg_control																													4		normgene->intron
7892703					---	---	---	---	---	pos_control																													4		normgene->exon
7892704					---	---	---	---	---	pos_control																													4		normgene->exon
7892705					---	---	---	---	---	neg_control																													4		normgene->intron
7892706					---	---	---	---	---	neg_control																													4		normgene->intron
7892707					---	---	---	---	---	neg_control																													4		normgene->intron
7892708					---	---	---	---	---	neg_control																													4		normgene->intron
7892709					---	---	---	---	---	neg_control																													4		normgene->intron
7892710					---	---	---	---	---	neg_control																													4		normgene->intron
7892711					---	---	---	---	---	neg_control																													3		normgene->intron
7892712					---	---	---	---	---	neg_control																													4		normgene->intron
7892713					---	---	---	---	---	neg_control																													3		normgene->intron
7892714					---	---	---	---	---	neg_control																													4		normgene->intron
7892715					---	---	---	---	---	neg_control																													4		normgene->intron
7892716					---	---	---	---	---	neg_control																													4		normgene->intron
7892717					---	---	---	---	---	pos_control																													4		normgene->exon
7892718					---	---	---	---	---	neg_control																													4		normgene->intron
7892719					---	---	---	---	---	neg_control																													4		normgene->intron
7892720					---	---	---	---	---	pos_control																													4		normgene->exon
7892721					---	---	---	---	---	neg_control																													4		normgene->intron
7892722					---	---	---	---	---	neg_control																													3		normgene->intron
7892723					---	---	---	---	---	neg_control																													4		normgene->intron
7892724					---	---	---	---	---	neg_control																													2		normgene->intron
7892725					---	---	---	---	---	neg_control																													2		normgene->intron
7892726					---	---	---	---	---	neg_control																													4		normgene->intron
7892727					---	---	---	---	---	neg_control																													4		normgene->intron
7892728					---	---	---	---	---	neg_control																													2		normgene->intron
7892729					---	---	---	---	---	neg_control																													4		normgene->intron
7892730					---	---	---	---	---	neg_control																													4		normgene->intron
7892731					---	---	---	---	---	neg_control																													4		normgene->intron
7892732					---	---	---	---	---	pos_control																													1		normgene->exon
7892733					---	---	---	---	---	neg_control																													4		normgene->intron
7892734					---	---	---	---	---	neg_control																													4		normgene->intron
7892735					---	---	---	---	---	neg_control																													4		normgene->intron
7892736					---	---	---	---	---	neg_control																													4		normgene->intron
7892737					---	---	---	---	---	neg_control																													4		normgene->intron
7892738					---	---	---	---	---	neg_control																													4		normgene->intron
7892739					---	---	---	---	---	neg_control																													4		normgene->intron
7892740					---	---	---	---	---	neg_control																													1		normgene->intron
7892741					---	---	---	---	---	neg_control																													4		normgene->intron
7892742					---	---	---	---	---	pos_control																													4		normgene->exon
7892743					---	---	---	---	---	neg_control																													4		normgene->intron
7892744					---	---	---	---	---	neg_control																													1		normgene->intron
7892745					---	---	---	---	---	pos_control																													4		normgene->exon
7892746					---	---	---	---	---	neg_control																													4		normgene->intron
7892747					---	---	---	---	---	pos_control																													4		normgene->exon
7892748					---	---	---	---	---	neg_control																													4		normgene->intron
7892749					---	---	---	---	---	neg_control																													4		normgene->intron
7892750					---	---	---	---	---	neg_control																													4		normgene->intron
7892751					---	---	---	---	---	neg_control																													4		normgene->intron
7892752					---	---	---	---	---	neg_control																													4		normgene->intron
7892753					---	---	---	---	---	neg_control																													4		normgene->intron
7892754					---	---	---	---	---	neg_control																													4		normgene->intron
7892755					---	---	---	---	---	neg_control																													4		normgene->intron
7892756					---	---	---	---	---	---																													431		control->bgp->antigenomic
7892757					---	---	---	---	---	pos_control																													4		normgene->exon
7892758					---	---	---	---	---	neg_control																													4		normgene->intron
7892759					---	---	---	---	---	neg_control																													4		normgene->intron
7892760					---	---	---	---	---	neg_control																													4		normgene->intron
7892761					---	---	---	---	---	neg_control																													4		normgene->intron
7892762					---	---	---	---	---	pos_control																													4		normgene->exon
7892763					---	---	---	---	---	neg_control																													4		normgene->intron
7892764					---	---	---	---	---	pos_control																													4		normgene->exon
7892765					---	---	---	---	---	neg_control																													4		normgene->intron
7892766					---	---	---	---	---	pos_control																													4		normgene->exon
7892767					---	---	---	---	---	neg_control																													4		normgene->intron
7892768					---	---	---	---	---	neg_control																													4		normgene->intron
7892769					---	---	---	---	---	neg_control																													4		normgene->intron
7892770					---	---	---	---	---	pos_control																													1		normgene->exon
7892771					---	---	---	---	---	pos_control																													4		normgene->exon
7892772					---	---	---	---	---	neg_control																													4		normgene->intron
7892773					---	---	---	---	---	pos_control																													4		normgene->exon
7892774					---	---	---	---	---	neg_control																													4		normgene->intron
7892775					---	---	---	---	---	neg_control																													4		normgene->intron
7892776					---	---	---	---	---	pos_control																													4		normgene->exon
7892777					---	---	---	---	---	neg_control																													4		normgene->intron
7892778					---	---	---	---	---	pos_control																													4		normgene->exon
7892779					---	---	---	---	---	neg_control																													4		normgene->intron
7892780					---	---	---	---	---	neg_control																													4		normgene->intron
7892781					---	---	---	---	---	neg_control																													4		normgene->intron
7892782					---	---	---	---	---	neg_control																													4		normgene->intron
7892783					---	---	---	---	---	neg_control																													4		normgene->intron
7892784					---	---	---	---	---	neg_control																													4		normgene->intron
7892785					---	---	---	---	---	neg_control																													4		normgene->intron
7892786					---	---	---	---	---	pos_control																													4		normgene->exon
7892787					---	---	---	---	---	neg_control																													4		normgene->intron
7892788					---	---	---	---	---	pos_control																													4		normgene->exon
7892789					---	---	---	---	---	neg_control																													4		normgene->intron
7892790					---	---	---	---	---	neg_control																													4		normgene->intron
7892791					---	---	---	---	---	pos_control																													3		normgene->exon
7892792					---	---	---	---	---	neg_control																													4		normgene->intron
7892793					---	---	---	---	---	neg_control																													4		normgene->intron
7892794					---	---	---	---	---	neg_control																													4		normgene->intron
7892795					---	---	---	---	---	neg_control																													4		normgene->intron
7892796					---	---	---	---	---	AFFX-CreX-5_at, bac_spike																													20		control->affx
7892797					---	---	---	---	---	pos_control																													4		normgene->exon
7892798					---	---	---	---	---	neg_control																													4		normgene->intron
7892799					---	---	---	---	---	neg_control																													4		normgene->intron
7892800					---	---	---	---	---	neg_control																													4		normgene->intron
7892801					---	---	---	---	---	neg_control																													4		normgene->intron
7892802					---	---	---	---	---	pos_control																													4		normgene->exon
7892803					---	---	---	---	---	pos_control																													4		normgene->exon
7892804					---	---	---	---	---	neg_control																													4		normgene->intron
7892805					---	---	---	---	---	neg_control																													4		normgene->intron
7892806					---	---	---	---	---	neg_control																													4		normgene->intron
7892807					---	---	---	---	---	neg_control																													4		normgene->intron
7892808					---	---	---	---	---	pos_control																													4		normgene->exon
7892809					---	---	---	---	---	neg_control																													4		normgene->intron
7892810					---	---	---	---	---	neg_control																													4		normgene->intron
7892811					---	---	---	---	---	neg_control																													4		normgene->intron
7892812					---	---	---	---	---	neg_control																													4		normgene->intron
7892813					---	---	---	---	---	neg_control																													4		normgene->intron
7892814					---	---	---	---	---	pos_control																													4		normgene->exon
7892815					---	---	---	---	---	---																													480		control->bgp->antigenomic
7892816					---	---	---	---	---	neg_control																													4		normgene->intron
7892817					---	---	---	---	---	pos_control																													2		normgene->exon
7892818					---	---	---	---	---	neg_control																													4		normgene->intron
7892819					---	---	---	---	---	neg_control																													1		normgene->intron
7892820					---	---	---	---	---	pos_control																													4		normgene->exon
7892821					---	---	---	---	---	neg_control																													4		normgene->intron
7892822					---	---	---	---	---	neg_control																													4		normgene->intron
7892823					---	---	---	---	---	neg_control																													2		normgene->intron
7892824					---	---	---	---	---	neg_control																													4		normgene->intron
7892825					---	---	---	---	---	pos_control																													4		normgene->exon
7892826					---	---	---	---	---	neg_control																													4		normgene->intron
7892827					---	---	---	---	---	neg_control																													4		normgene->intron
7892828					---	---	---	---	---	neg_control																													4		normgene->intron
7892829					---	---	---	---	---	pos_control																													4		normgene->exon
7892830					---	---	---	---	---	pos_control																													4		normgene->exon
7892831					---	---	---	---	---	pos_control																													4		normgene->exon
7892832					---	---	---	---	---	pos_control																													4		normgene->exon
7892833					---	---	---	---	---	neg_control																													4		normgene->intron
7892834					---	---	---	---	---	neg_control																													4		normgene->intron
7892835					---	---	---	---	---	pos_control																													4		normgene->exon
7892836					---	---	---	---	---	pos_control																													4		normgene->exon
7892837					---	---	---	---	---	pos_control																													2		normgene->exon
7892838					---	---	---	---	---	pos_control																													4		normgene->exon
7892839					---	---	---	---	---	neg_control																													4		normgene->intron
7892840					---	---	---	---	---	neg_control																													4		normgene->intron
7892841					---	---	---	---	---	pos_control																													4		normgene->exon
7892842					---	---	---	---	---	neg_control																													4		normgene->intron
7892843					---	---	---	---	---	neg_control																													4		normgene->intron
7892844					---	---	---	---	---	neg_control																													4		normgene->intron
7892845					---	---	---	---	---	neg_control																													4		normgene->intron
7892846					---	---	---	---	---	pos_control																													4		normgene->exon
7892847					---	---	---	---	---	pos_control																													4		normgene->exon
7892848					---	---	---	---	---	pos_control																													4		normgene->exon
7892849					---	---	---	---	---	neg_control																													4		normgene->intron
7892850					---	---	---	---	---	neg_control																													4		normgene->intron
7892851					---	---	---	---	---	neg_control																													4		normgene->intron
7892852					---	---	---	---	---	neg_control																													4		normgene->intron
7892853					---	---	---	---	---	pos_control																													4		normgene->exon
7892854					---	---	---	---	---	neg_control																													2		normgene->intron
7892855					---	---	---	---	---	neg_control																													4		normgene->intron
7892856					---	---	---	---	---	neg_control																													4		normgene->intron
7892857					---	---	---	---	---	pos_control																													4		normgene->exon
7892858					---	---	---	---	---	neg_control																													3		normgene->intron
7892859					---	---	---	---	---	neg_control																													4		normgene->intron
7892860					---	---	---	---	---	neg_control																													4		normgene->intron
7892861					---	---	---	---	---	pos_control																													4		normgene->exon
7892862					---	---	---	---	---	neg_control																													4		normgene->intron
7892863					---	---	---	---	---	neg_control																													4		normgene->intron
7892864					---	---	---	---	---	neg_control																													4		normgene->intron
7892865					---	---	---	---	---	neg_control																													4		normgene->intron
7892866					---	---	---	---	---	neg_control																													4		normgene->intron
7892867					---	---	---	---	---	neg_control																													4		normgene->intron
7892868					---	---	---	---	---	pos_control																													4		normgene->exon
7892869					---	---	---	---	---	neg_control																													4		normgene->intron
7892870					---	---	---	---	---	pos_control																													1		normgene->exon
7892871					---	---	---	---	---	neg_control																													4		normgene->intron
7892872					---	---	---	---	---	neg_control																													4		normgene->intron
7892873					---	---	---	---	---	neg_control																													3		normgene->intron
7892874					---	---	---	---	---	neg_control																													4		normgene->intron
7892875					---	---	---	---	---	neg_control																													4		normgene->intron
7892876					---	---	---	---	---	pos_control																													4		normgene->exon
7892877					---	---	---	---	---	neg_control																													4		normgene->intron
7892878					---	---	---	---	---	neg_control																													4		normgene->intron
7892879					---	---	---	---	---	neg_control																													4		normgene->intron
7892880					---	---	---	---	---	pos_control																													4		normgene->exon
7892881					---	---	---	---	---	neg_control																													4		normgene->intron
7892882					---	---	---	---	---	pos_control																													4		normgene->exon
7892883					---	---	---	---	---	neg_control																													4		normgene->intron
7892884					---	---	---	---	---	pos_control																													4		normgene->exon
7892885					---	---	---	---	---	neg_control																													4		normgene->intron
7892886					---	---	---	---	---	neg_control																													4		normgene->intron
7892887					---	---	---	---	---	neg_control																													4		normgene->intron
7892888					---	---	---	---	---	neg_control																													4		normgene->intron
7892889					---	---	---	---	---	neg_control																													4		normgene->intron
7892890					---	---	---	---	---	pos_control																													4		normgene->exon
7892891					---	---	---	---	---	neg_control																													4		normgene->intron
7892892					---	---	---	---	---	neg_control																													4		normgene->intron
7892893					---	---	---	---	---	pos_control																													4		normgene->exon
7892894					---	---	---	---	---	pos_control																													4		normgene->exon
7892895					---	---	---	---	---	neg_control																													4		normgene->intron
7892896					---	---	---	---	---	pos_control																													4		normgene->exon
7892897					---	---	---	---	---	neg_control																													1		normgene->intron
7892898					---	---	---	---	---	pos_control																													4		normgene->exon
7892899					---	---	---	---	---	neg_control																													4		normgene->intron
7892900					---	---	---	---	---	pos_control																													4		normgene->exon
7892901					---	---	---	---	---	pos_control																													4		normgene->exon
7892902					---	---	---	---	---	pos_control																													4		normgene->exon
7892903					---	---	---	---	---	neg_control																													4		normgene->intron
7892904					---	---	---	---	---	neg_control																													4		normgene->intron
7892905					---	---	---	---	---	pos_control																													4		normgene->exon
7892906					---	---	---	---	---	pos_control																													4		normgene->exon
7892907					---	---	---	---	---	pos_control																													4		normgene->exon
7892908					---	---	---	---	---	neg_control																													4		normgene->intron
7892909					---	---	---	---	---	neg_control																													4		normgene->intron
7892910					---	---	---	---	---	neg_control																													1		normgene->intron
7892911					---	---	---	---	---	pos_control																													4		normgene->exon
7892912					---	---	---	---	---	pos_control																													4		normgene->exon
7892913					---	---	---	---	---	neg_control																													2		normgene->intron
7892914					---	---	---	---	---	neg_control																													4		normgene->intron
7892915					---	---	---	---	---	neg_control																													4		normgene->intron
7892916					---	---	---	---	---	---																													406		control->bgp->antigenomic
7892917					---	---	---	---	---	neg_control																													4		normgene->intron
7892918					---	---	---	---	---	neg_control																													4		normgene->intron
7892919					---	---	---	---	---	pos_control																													1		normgene->exon
7892920					---	---	---	---	---	neg_control																													4		normgene->intron
7892921					---	---	---	---	---	neg_control																													4		normgene->intron
7892922					---	---	---	---	---	neg_control																													4		normgene->intron
7892923					---	---	---	---	---	neg_control																													4		normgene->intron
7892924					---	---	---	---	---	neg_control																													4		normgene->intron
7892925					---	---	---	---	---	AFFX-BioC-3_at, bac_spike																													20		control->affx
7892926					---	---	---	---	---	neg_control																													4		normgene->intron
7892927					---	---	---	---	---	neg_control																													4		normgene->intron
7892928					---	---	---	---	---	neg_control																													4		normgene->intron
7892929					---	---	---	---	---	neg_control																													4		normgene->intron
7892930					---	---	---	---	---	neg_control																													4		normgene->intron
7892931					---	---	---	---	---	neg_control																													4		normgene->intron
7892932					---	---	---	---	---	neg_control																													4		normgene->intron
7892933					---	---	---	---	---	neg_control																													4		normgene->intron
7892934					---	---	---	---	---	neg_control																													4		normgene->intron
7892935					---	---	---	---	---	pos_control																													4		normgene->exon
7892936					---	---	---	---	---	neg_control																													4		normgene->intron
7892937					---	---	---	---	---	neg_control																													4		normgene->intron
7892938					---	---	---	---	---	neg_control																													4		normgene->intron
7892939					---	---	---	---	---	pos_control																													4		normgene->exon
7892940					---	---	---	---	---	neg_control																													4		normgene->intron
7892941					---	---	---	---	---	pos_control																													4		normgene->exon
7892942					---	---	---	---	---	neg_control																													4		normgene->intron
7892943					---	---	---	---	---	---																													456		control->bgp->antigenomic
7892944					---	---	---	---	---	pos_control																													4		normgene->exon
7892945					---	---	---	---	---	neg_control																													4		normgene->intron
7892946					---	---	---	---	---	neg_control																													4		normgene->intron
7892947					---	---	---	---	---	pos_control																													4		normgene->exon
7892948					---	---	---	---	---	neg_control																													4		normgene->intron
7892949					---	---	---	---	---	neg_control																													4		normgene->intron
7892950					---	---	---	---	---	neg_control																													4		normgene->intron
7892951					---	---	---	---	---	pos_control																													4		normgene->exon
7892952					---	---	---	---	---	neg_control																													4		normgene->intron
7892953					---	---	---	---	---	pos_control																													4		normgene->exon
7892954					---	---	---	---	---	pos_control																													4		normgene->exon
7892955					---	---	---	---	---	neg_control																													4		normgene->intron
7892956					---	---	---	---	---	neg_control																													4		normgene->intron
7892957					---	---	---	---	---	neg_control																													4		normgene->intron
7892958					---	---	---	---	---	neg_control																													4		normgene->intron
7892959					---	---	---	---	---	pos_control																													4		normgene->exon
7892960					---	---	---	---	---	neg_control																													4		normgene->intron
7892961					---	---	---	---	---	neg_control																													4		normgene->intron
7892962					---	---	---	---	---	neg_control																													4		normgene->intron
7892963					---	---	---	---	---	neg_control																													4		normgene->intron
7892964					---	---	---	---	---	neg_control																													4		normgene->intron
7892965					---	---	---	---	---	neg_control																													4		normgene->intron
7892966					---	---	---	---	---	pos_control																													4		normgene->exon
7892967					---	---	---	---	---	pos_control																													3		normgene->exon
7892968					---	---	---	---	---	pos_control																													4		normgene->exon
7892969					---	---	---	---	---	neg_control																													4		normgene->intron
7892970					---	---	---	---	---	neg_control																													4		normgene->intron
7892971					---	---	---	---	---	---																													458		control->bgp->antigenomic
7892972					---	---	---	---	---	pos_control																													4		normgene->exon
7892973					---	---	---	---	---	neg_control																													4		normgene->intron
7892974					---	---	---	---	---	neg_control																													4		normgene->intron
7892975					---	---	---	---	---	neg_control																													4		normgene->intron
7892976					---	---	---	---	---	neg_control																													4		normgene->intron
7892977					---	---	---	---	---	pos_control																													4		normgene->exon
7892978					---	---	---	---	---	neg_control																													4		normgene->intron
7892979					---	---	---	---	---	pos_control																													4		normgene->exon
7892980					---	---	---	---	---	neg_control																													4		normgene->intron
7892981					---	---	---	---	---	pos_control																													4		normgene->exon
7892982					---	---	---	---	---	neg_control																													1		normgene->intron
7892983					---	---	---	---	---	pos_control																													4		normgene->exon
7892984					---	---	---	---	---	neg_control																													4		normgene->intron
7892985					---	---	---	---	---	neg_control																													4		normgene->intron
7892986					---	---	---	---	---	pos_control																													4		normgene->exon
7892987					---	---	---	---	---	neg_control																													4		normgene->intron
7892988					---	---	---	---	---	neg_control																													4		normgene->intron
7892989					---	---	---	---	---	neg_control																													4		normgene->intron
7892990					---	---	---	---	---	neg_control																													3		normgene->intron
7892991					---	---	---	---	---	neg_control																													4		normgene->intron
7892992					---	---	---	---	---	neg_control																													4		normgene->intron
7892993					---	---	---	---	---	neg_control																													4		normgene->intron
7892994					---	---	---	---	---	neg_control																													4		normgene->intron
7892995					---	---	---	---	---	pos_control																													4		normgene->exon
7892996					---	---	---	---	---	neg_control																													4		normgene->intron
7892997					---	---	---	---	---	neg_control																													4		normgene->intron
7892998					---	---	---	---	---	neg_control																													4		normgene->intron
7892999					---	---	---	---	---	neg_control																													2		normgene->intron
7893000					---	---	---	---	---	neg_control																													4		normgene->intron
7893001					---	---	---	---	---	pos_control																													4		normgene->exon
7893002					---	---	---	---	---	pos_control																													4		normgene->exon
7893003					---	---	---	---	---	neg_control																													4		normgene->intron
7893004					---	---	---	---	---	neg_control																													2		normgene->intron
7893005					---	---	---	---	---	pos_control																													3		normgene->exon
7893006					---	---	---	---	---	neg_control																													4		normgene->intron
7893007					---	---	---	---	---	neg_control																													4		normgene->intron
7893008					---	---	---	---	---	neg_control																													4		normgene->intron
7893009					---	---	---	---	---	neg_control																													4		normgene->intron
7893010					---	---	---	---	---	neg_control																													4		normgene->intron
7893011					---	---	---	---	---	neg_control																													4		normgene->intron
7893012					---	---	---	---	---	pos_control																													4		normgene->exon
7893013					---	---	---	---	---	neg_control																													4		normgene->intron
7893014					---	---	---	---	---	neg_control																													4		normgene->intron
7893015					---	---	---	---	---	pos_control																													1		normgene->exon
7893016					---	---	---	---	---	neg_control																													4		normgene->intron
7893017					---	---	---	---	---	neg_control																													4		normgene->intron
7893018					---	---	---	---	---	neg_control																													4		normgene->intron
7893019					---	---	---	---	---	pos_control																													4		normgene->exon
7893021					---	---	---	---	---	neg_control																													4		normgene->intron
7893022					---	---	---	---	---	neg_control																													4		normgene->intron
7893023					---	---	---	---	---	pos_control																													4		normgene->exon
7893024					---	---	---	---	---	neg_control																													4		normgene->intron
7893025					---	---	---	---	---	pos_control																													4		normgene->exon
7893026					---	---	---	---	---	---																													419		control->bgp->antigenomic
7893027					---	---	---	---	---	pos_control																													4		normgene->exon
7893028					---	---	---	---	---	neg_control																													4		normgene->intron
7893029					---	---	---	---	---	pos_control																													4		normgene->exon
7893030					---	---	---	---	---	pos_control																													3		normgene->exon
7893031					---	---	---	---	---	pos_control																													4		normgene->exon
7893032					---	---	---	---	---	pos_control																													4		normgene->exon
7893033					---	---	---	---	---	neg_control																													1		normgene->intron
7893034					---	---	---	---	---	neg_control																													4		normgene->intron
7893035					---	---	---	---	---	neg_control																													4		normgene->intron
7893036					---	---	---	---	---	pos_control																													4		normgene->exon
7893037					---	---	---	---	---	neg_control																													4		normgene->intron
7893038					---	---	---	---	---	neg_control																													4		normgene->intron
7893039					---	---	---	---	---	pos_control																													1		normgene->exon
7893040					---	---	---	---	---	neg_control																													4		normgene->intron
7893041					---	---	---	---	---	neg_control																													4		normgene->intron
7893042					---	---	---	---	---	neg_control																													4		normgene->intron
7893043					---	---	---	---	---	neg_control																													4		normgene->intron
7893044					---	---	---	---	---	neg_control																													4		normgene->intron
7893045					---	---	---	---	---	neg_control																													4		normgene->intron
7893046					---	---	---	---	---	neg_control																													4		normgene->intron
7893047					---	---	---	---	---	neg_control																													4		normgene->intron
7893048					---	---	---	---	---	neg_control																													4		normgene->intron
7893049					---	---	---	---	---	neg_control																													3		normgene->intron
7893050					---	---	---	---	---	pos_control																													4		normgene->exon
7893051					---	---	---	---	---	neg_control																													2		normgene->intron
7893052					---	---	---	---	---	neg_control																													4		normgene->intron
7893053					---	---	---	---	---	neg_control																													4		normgene->intron
7893055					---	---	---	---	---	neg_control																													4		normgene->intron
7893056					---	---	---	---	---	neg_control																													3		normgene->intron
7893057					---	---	---	---	---	neg_control																													4		normgene->intron
7893058					---	---	---	---	---	pos_control																													4		normgene->exon
7893059					---	---	---	---	---	neg_control																													4		normgene->intron
7893060					---	---	---	---	---	neg_control																													4		normgene->intron
7893061					---	---	---	---	---	pos_control																													4		normgene->exon
7893062					---	---	---	---	---	neg_control																													4		normgene->intron
7893063					---	---	---	---	---	neg_control																													4		normgene->intron
7893064					---	---	---	---	---	pos_control																													4		normgene->exon
7893065					---	---	---	---	---	neg_control																													4		normgene->intron
7893066					---	---	---	---	---	neg_control																													4		normgene->intron
7893067					---	---	---	---	---	neg_control																													4		normgene->intron
7893068					---	---	---	---	---	neg_control																													4		normgene->intron
7893069					---	---	---	---	---	neg_control																													4		normgene->intron
7893070					---	---	---	---	---	pos_control																													4		normgene->exon
7893071					---	---	---	---	---	neg_control																													4		normgene->intron
7893072					---	---	---	---	---	neg_control																													4		normgene->intron
7893073					---	---	---	---	---	pos_control																													4		normgene->exon
7893074					---	---	---	---	---	pos_control																													4		normgene->exon
7893075					---	---	---	---	---	neg_control																													4		normgene->intron
7893076					---	---	---	---	---	neg_control																													3		normgene->intron
7893077					---	---	---	---	---	neg_control																													4		normgene->intron
7893078					---	---	---	---	---	neg_control																													3		normgene->intron
7893079					---	---	---	---	---	pos_control																													4		normgene->exon
7893080					---	---	---	---	---	neg_control																													4		normgene->intron
7893081					---	---	---	---	---	pos_control																													4		normgene->exon
7893082					---	---	---	---	---	neg_control																													4		normgene->intron
7893083					---	---	---	---	---	neg_control																													4		normgene->intron
7893084					---	---	---	---	---	neg_control																													4		normgene->intron
7893085					---	---	---	---	---	neg_control																													4		normgene->intron
7893086					---	---	---	---	---	pos_control																													4		normgene->exon
7893087					---	---	---	---	---	pos_control																													4		normgene->exon
7893088					---	---	---	---	---	neg_control																													2		normgene->intron
7893089					---	---	---	---	---	neg_control																													4		normgene->intron
7893090					---	---	---	---	---	pos_control																													4		normgene->exon
7893091					---	---	---	---	---	pos_control																													1		normgene->exon
7893092					---	---	---	---	---	neg_control																													4		normgene->intron
7893093					---	---	---	---	---	neg_control																													4		normgene->intron
7893094					---	---	---	---	---	pos_control																													4		normgene->exon
7893095					---	---	---	---	---	neg_control																													4		normgene->intron
7893096					---	---	---	---	---	neg_control																													4		normgene->intron
7893097					---	---	---	---	---	pos_control																													4		normgene->exon
7893098					---	---	---	---	---	neg_control																													4		normgene->intron
7893099					---	---	---	---	---	neg_control																													2		normgene->intron
7893100					---	---	---	---	---	neg_control																													4		normgene->intron
7893101					---	---	---	---	---	neg_control																													4		normgene->intron
7893102					---	---	---	---	---	neg_control																													4		normgene->intron
7893103					---	---	---	---	---	pos_control																													3		normgene->exon
7893104					---	---	---	---	---	neg_control																													4		normgene->intron
7893105					---	---	---	---	---	neg_control																													4		normgene->intron
7893106					---	---	---	---	---	neg_control																													4		normgene->intron
7893107					---	---	---	---	---	neg_control																													4		normgene->intron
7893108					---	---	---	---	---	neg_control																													1		normgene->intron
7893109					---	---	---	---	---	neg_control																													4		normgene->intron
7893110					---	---	---	---	---	neg_control																													4		normgene->intron
7893111					---	---	---	---	---	neg_control																													4		normgene->intron
7893112					---	---	---	---	---	neg_control																													4		normgene->intron
7893113					---	---	---	---	---	pos_control																													4		normgene->exon
7893114					---	---	---	---	---	neg_control																													4		normgene->intron
7893115					---	---	---	---	---	neg_control																													4		normgene->intron
7893116					---	---	---	---	---	neg_control																													4		normgene->intron
7893117					---	---	---	---	---	neg_control																													4		normgene->intron
7893118					---	---	---	---	---	pos_control																													4		normgene->exon
7893119					---	---	---	---	---	neg_control																													4		normgene->intron
7893120					---	---	---	---	---	neg_control																													4		normgene->intron
7893121					---	---	---	---	---	neg_control																													4		normgene->intron
7893122					---	---	---	---	---	pos_control																													4		normgene->exon
7893123					---	---	---	---	---	neg_control																													4		normgene->intron
7893124					---	---	---	---	---	neg_control																													4		normgene->intron
7893125					---	---	---	---	---	pos_control																													4		normgene->exon
7893126					---	---	---	---	---	neg_control																													4		normgene->intron
7893127					---	---	---	---	---	neg_control																													3		normgene->intron
7893128					---	---	---	---	---	pos_control																													4		normgene->exon
7893129					---	---	---	---	---	neg_control																													4		normgene->intron
7893130					---	---	---	---	---	AFFX-BioDn-5_at, bac_spike																													20		control->affx
7893131					---	---	---	---	---	pos_control																													4		normgene->exon
7893132					---	---	---	---	---	neg_control																													4		normgene->intron
7893133					---	---	---	---	---	pos_control																													4		normgene->exon
7893134					---	---	---	---	---	neg_control																													4		normgene->intron
7893135					---	---	---	---	---	neg_control																													1		normgene->intron
7893136					---	---	---	---	---	neg_control																													4		normgene->intron
7893137					---	---	---	---	---	neg_control																													4		normgene->intron
7893138					---	---	---	---	---	pos_control																													4		normgene->exon
7893139					---	---	---	---	---	pos_control																													4		normgene->exon
7893140					---	---	---	---	---	neg_control																													4		normgene->intron
7893141					---	---	---	---	---	neg_control																													4		normgene->intron
7893142					---	---	---	---	---	neg_control																													4		normgene->intron
7893143					---	---	---	---	---	neg_control																													4		normgene->intron
7893144					---	---	---	---	---	neg_control																													4		normgene->intron
7893145					---	---	---	---	---	neg_control																													1		normgene->intron
7893146					---	---	---	---	---	neg_control																													4		normgene->intron
7893147					---	---	---	---	---	neg_control																													4		normgene->intron
7893148					---	---	---	---	---	neg_control																													4		normgene->intron
7893149					---	---	---	---	---	neg_control																													4		normgene->intron
7893150					---	---	---	---	---	neg_control																													4		normgene->intron
7893151					---	---	---	---	---	neg_control																													4		normgene->intron
7893152					---	---	---	---	---	neg_control																													4		normgene->intron
7893153					---	---	---	---	---	pos_control																													4		normgene->exon
7893154					---	---	---	---	---	neg_control																													4		normgene->intron
7893155					---	---	---	---	---	neg_control																													4		normgene->intron
7893156					---	---	---	---	---	neg_control																													4		normgene->intron
7893157					---	---	---	---	---	neg_control																													4		normgene->intron
7893158					---	---	---	---	---	neg_control																													4		normgene->intron
7893159					---	---	---	---	---	neg_control																													4		normgene->intron
7893160					---	---	---	---	---	pos_control																													4		normgene->exon
7893161					---	---	---	---	---	neg_control																													4		normgene->intron
7893162					---	---	---	---	---	neg_control																													4		normgene->intron
7893163					---	---	---	---	---	neg_control																													4		normgene->intron
7893164					---	---	---	---	---	pos_control																													4		normgene->exon
7893165					---	---	---	---	---	neg_control																													4		normgene->intron
7893166					---	---	---	---	---	pos_control																													4		normgene->exon
7893167					---	---	---	---	---	neg_control																													4		normgene->intron
7893168					---	---	---	---	---	neg_control																													4		normgene->intron
7893169					---	---	---	---	---	neg_control																													4		normgene->intron
7893170					---	---	---	---	---	pos_control																													4		normgene->exon
7893171					---	---	---	---	---	neg_control																													4		normgene->intron
7893172					---	---	---	---	---	neg_control																													3		normgene->intron
7893173					---	---	---	---	---	pos_control																													4		normgene->exon
7893174					---	---	---	---	---	neg_control																													4		normgene->intron
7893175					---	---	---	---	---	neg_control																													1		normgene->intron
7893176					---	---	---	---	---	neg_control																													4		normgene->intron
7893177					---	---	---	---	---	neg_control																													1		normgene->intron
7893178					---	---	---	---	---	neg_control																													4		normgene->intron
7893179					---	---	---	---	---	neg_control																													4		normgene->intron
7893180					---	---	---	---	---	neg_control																													4		normgene->intron
7893181					---	---	---	---	---	pos_control																													4		normgene->exon
7893182					---	---	---	---	---	neg_control																													4		normgene->intron
7893183					---	---	---	---	---	neg_control																													4		normgene->intron
7893184					---	---	---	---	---	pos_control																													3		normgene->exon
7893185					---	---	---	---	---	neg_control																													4		normgene->intron
7893186					---	---	---	---	---	neg_control																													4		normgene->intron
7893187					---	---	---	---	---	pos_control																													4		normgene->exon
7893188					---	---	---	---	---	neg_control																													4		normgene->intron
7893189					---	---	---	---	---	neg_control																													4		normgene->intron
7893190					---	---	---	---	---	neg_control																													4		normgene->intron
7893191					---	---	---	---	---	pos_control																													4		normgene->exon
7893192					---	---	---	---	---	neg_control																													4		normgene->intron
7893193					---	---	---	---	---	neg_control																													1		normgene->intron
7893194					---	---	---	---	---	pos_control																													1		normgene->exon
7893195					---	---	---	---	---	neg_control																													4		normgene->intron
7893196					---	---	---	---	---	pos_control																													1		normgene->exon
7893197					---	---	---	---	---	neg_control																													4		normgene->intron
7893198					---	---	---	---	---	neg_control																													4		normgene->intron
7893199					---	---	---	---	---	neg_control																													4		normgene->intron
7893200					---	---	---	---	---	neg_control																													4		normgene->intron
7893201					---	---	---	---	---	pos_control																													4		normgene->exon
7893202					---	---	---	---	---	neg_control																													4		normgene->intron
7893203					---	---	---	---	---	neg_control																													4		normgene->intron
7893204					---	---	---	---	---	neg_control																													4		normgene->intron
7893205					---	---	---	---	---	pos_control																													4		normgene->exon
7893206					---	---	---	---	---	pos_control																													4		normgene->exon
7893207					---	---	---	---	---	neg_control																													4		normgene->intron
7893208					---	---	---	---	---	pos_control																													4		normgene->exon
7893209					---	---	---	---	---	neg_control																													4		normgene->intron
7893210					---	---	---	---	---	neg_control																													4		normgene->intron
7893211					---	---	---	---	---	neg_control																													4		normgene->intron
7893212					---	---	---	---	---	neg_control																													4		normgene->intron
7893213					---	---	---	---	---	neg_control																													4		normgene->intron
7893214					---	---	---	---	---	neg_control																													3		normgene->intron
7893215					---	---	---	---	---	neg_control																													4		normgene->intron
7893216					---	---	---	---	---	neg_control																													4		normgene->intron
7893217					---	---	---	---	---	pos_control																													2		normgene->exon
7893218					---	---	---	---	---	pos_control																													4		normgene->exon
7893219					---	---	---	---	---	neg_control																													4		normgene->intron
7893220					---	---	---	---	---	neg_control																													4		normgene->intron
7893221					---	---	---	---	---	neg_control																													4		normgene->intron
7893222					---	---	---	---	---	neg_control																													4		normgene->intron
7893223					---	---	---	---	---	neg_control																													2		normgene->intron
7893224					---	---	---	---	---	neg_control																													4		normgene->intron
7893225					---	---	---	---	---	neg_control																													4		normgene->intron
7893226					---	---	---	---	---	neg_control																													4		normgene->intron
7893227					---	---	---	---	---	neg_control																													4		normgene->intron
7893228					---	---	---	---	---	neg_control																													4		normgene->intron
7893229					---	---	---	---	---	pos_control																													4		normgene->exon
7893230					---	---	---	---	---	neg_control																													1		normgene->intron
7893231					---	---	---	---	---	neg_control																													4		normgene->intron
7893232					---	---	---	---	---	pos_control																													4		normgene->exon
7893233					---	---	---	---	---	neg_control																													4		normgene->intron
7893234					---	---	---	---	---	neg_control																													4		normgene->intron
7893235					---	---	---	---	---	pos_control																													4		normgene->exon
7893236					---	---	---	---	---	neg_control																													4		normgene->intron
7893237					---	---	---	---	---	neg_control																													4		normgene->intron
7893238					---	---	---	---	---	pos_control																													4		normgene->exon
7893239					---	---	---	---	---	neg_control																													4		normgene->intron
7893240					---	---	---	---	---	pos_control																													4		normgene->exon
7893241					---	---	---	---	---	neg_control																													3		normgene->intron
7893242					---	---	---	---	---	neg_control																													4		normgene->intron
7893243					---	---	---	---	---	neg_control																													4		normgene->intron
7893244					---	---	---	---	---	pos_control																													4		normgene->exon
7893245					---	---	---	---	---	neg_control																													4		normgene->intron
7893246					---	---	---	---	---	neg_control																													4		normgene->intron
7893247					---	---	---	---	---	neg_control																													4		normgene->intron
7893248					---	---	---	---	---	pos_control																													4		normgene->exon
7893249					---	---	---	---	---	pos_control																													4		normgene->exon
7893250					---	---	---	---	---	pos_control																													4		normgene->exon
7893251					---	---	---	---	---	neg_control																													4		normgene->intron
7893252					---	---	---	---	---	neg_control																													4		normgene->intron
7893253					---	---	---	---	---	neg_control																													4		normgene->intron
7893254					---	---	---	---	---	neg_control																													4		normgene->intron
7893255					---	---	---	---	---	neg_control																													4		normgene->intron
7893256					---	---	---	---	---	neg_control																													4		normgene->intron
7893257					---	---	---	---	---	pos_control																													4		normgene->exon
7893258					---	---	---	---	---	pos_control																													4		normgene->exon
7893259					---	---	---	---	---	pos_control																													4		normgene->exon
7893260					---	---	---	---	---	neg_control																													4		normgene->intron
7893261					---	---	---	---	---	pos_control																													4		normgene->exon
7893262					---	---	---	---	---	pos_control																													4		normgene->exon
7893263					---	---	---	---	---	neg_control																													4		normgene->intron
7893264					---	---	---	---	---	pos_control																													4		normgene->exon
7893265					---	---	---	---	---	neg_control																													4		normgene->intron
7893266					---	---	---	---	---	pos_control																													4		normgene->exon
7893267					---	---	---	---	---	neg_control																													2		normgene->intron
7893268					---	---	---	---	---	pos_control																													4		normgene->exon
7893269					---	---	---	---	---	neg_control																													4		normgene->intron
7893270					---	---	---	---	---	pos_control																													4		normgene->exon
7893271					---	---	---	---	---	pos_control																													4		normgene->exon
7893272					---	---	---	---	---	pos_control																													4		normgene->exon
7893273					---	---	---	---	---	pos_control																													4		normgene->exon
7893274					---	---	---	---	---	neg_control																													4		normgene->intron
7893275					---	---	---	---	---	neg_control																													4		normgene->intron
7893276					---	---	---	---	---	neg_control																													4		normgene->intron
7893277					---	---	---	---	---	pos_control																													4		normgene->exon
7893278					---	---	---	---	---	neg_control																													4		normgene->intron
7893279					---	---	---	---	---	neg_control																													4		normgene->intron
7893280					---	---	---	---	---	neg_control																													4		normgene->intron
7893281					---	---	---	---	---	neg_control																													4		normgene->intron
7893282					---	---	---	---	---	neg_control																													4		normgene->intron
7893283					---	---	---	---	---	neg_control																													4		normgene->intron
7893284					---	---	---	---	---	neg_control																													4		normgene->intron
7893285					---	---	---	---	---	neg_control																													4		normgene->intron
7893286					---	---	---	---	---	neg_control																													4		normgene->intron
7893287					---	---	---	---	---	neg_control																													4		normgene->intron
7893288					---	---	---	---	---	neg_control																													4		normgene->intron
7893289					---	---	---	---	---	neg_control																													4		normgene->intron
7893290					---	---	---	---	---	neg_control																													4		normgene->intron
7893291					---	---	---	---	---	pos_control																													4		normgene->exon
7893292					---	---	---	---	---	neg_control																													4		normgene->intron
7893293					---	---	---	---	---	neg_control																													4		normgene->intron
7893294					---	---	---	---	---	neg_control																													4		normgene->intron
7893295					---	---	---	---	---	neg_control																													4		normgene->intron
7893296					---	---	---	---	---	neg_control																													4		normgene->intron
7893297					---	---	---	---	---	pos_control																													4		normgene->exon
7893298					---	---	---	---	---	pos_control																													4		normgene->exon
7893299					---	---	---	---	---	neg_control																													2		normgene->intron
7893300					---	---	---	---	---	neg_control																													4		normgene->intron
7893301					---	---	---	---	---	neg_control																													4		normgene->intron
7893302					---	---	---	---	---	neg_control																													4		normgene->intron
7893303					---	---	---	---	---	neg_control																													4		normgene->intron
7893304					---	---	---	---	---	neg_control																													4		normgene->intron
7893305					---	---	---	---	---	pos_control																													4		normgene->exon
7893306					---	---	---	---	---	AFFX-Bs-thr_st, polya_spike																													1160		control->affx
7893307					---	---	---	---	---	neg_control																													4		normgene->intron
7893308					---	---	---	---	---	neg_control																													4		normgene->intron
7893309					---	---	---	---	---	pos_control																													4		normgene->exon
7893310					---	---	---	---	---	neg_control																													4		normgene->intron
7893311					---	---	---	---	---	neg_control																													4		normgene->intron
7893312					---	---	---	---	---	neg_control																													2		normgene->intron
7893313					---	---	---	---	---	pos_control																													4		normgene->exon
7893314					---	---	---	---	---	neg_control																													4		normgene->intron
7893315					---	---	---	---	---	neg_control																													4		normgene->intron
7893316					---	---	---	---	---	pos_control																													4		normgene->exon
7893317					---	---	---	---	---	neg_control																													4		normgene->intron
7893318					---	---	---	---	---	neg_control																													2		normgene->intron
7893319					---	---	---	---	---	neg_control																													4		normgene->intron
7893320					---	---	---	---	---	neg_control																													4		normgene->intron
7893321					---	---	---	---	---	neg_control																													4		normgene->intron
7893322					---	---	---	---	---	neg_control																													1		normgene->intron
7893323					---	---	---	---	---	neg_control																													4		normgene->intron
7893324					---	---	---	---	---	neg_control																													4		normgene->intron
7893325					---	---	---	---	---	pos_control																													4		normgene->exon
7893326					---	---	---	---	---	neg_control																													4		normgene->intron
7893327					---	---	---	---	---	neg_control																													4		normgene->intron
7893328					---	---	---	---	---	neg_control																													4		normgene->intron
7893329					---	---	---	---	---	neg_control																													4		normgene->intron
7893330					---	---	---	---	---	neg_control																													4		normgene->intron
7893331					---	---	---	---	---	neg_control																													4		normgene->intron
7893332					---	---	---	---	---	neg_control																													4		normgene->intron
7893333					---	---	---	---	---	pos_control																													4		normgene->exon
7893334					---	---	---	---	---	neg_control																													2		normgene->intron
7893335					---	---	---	---	---	neg_control																													4		normgene->intron
7893336					---	---	---	---	---	neg_control																													4		normgene->intron
7893337					---	---	---	---	---	neg_control																													4		normgene->intron
7893338					---	---	---	---	---	neg_control																													4		normgene->intron
7893339					---	---	---	---	---	pos_control																													4		normgene->exon
7893340					---	---	---	---	---	pos_control																													4		normgene->exon
7893341					---	---	---	---	---	neg_control																													4		normgene->intron
7893342					---	---	---	---	---	neg_control																													4		normgene->intron
7893343					---	---	---	---	---	neg_control																													4		normgene->intron
7893344					---	---	---	---	---	pos_control																													4		normgene->exon
7893345					---	---	---	---	---	pos_control																													4		normgene->exon
7893346					---	---	---	---	---	pos_control																													4		normgene->exon
7893347					---	---	---	---	---	neg_control																													4		normgene->intron
7893348					---	---	---	---	---	---																													203		control->bgp->antigenomic
7893349					---	---	---	---	---	pos_control																													4		normgene->exon
7893350					---	---	---	---	---	pos_control																													4		normgene->exon
7893351					---	---	---	---	---	neg_control																													4		normgene->intron
7893352					---	---	---	---	---	neg_control																													4		normgene->intron
7893353					---	---	---	---	---	neg_control																													4		normgene->intron
7893354					---	---	---	---	---	pos_control																													4		normgene->exon
7893355					---	---	---	---	---	neg_control																													1		normgene->intron
7893356					---	---	---	---	---	pos_control																													4		normgene->exon
7893357					---	---	---	---	---	pos_control																													4		normgene->exon
7893358					---	---	---	---	---	neg_control																													1		normgene->intron
7893359					---	---	---	---	---	pos_control																													2		normgene->exon
7893360					---	---	---	---	---	neg_control																													4		normgene->intron
7893361					---	---	---	---	---	neg_control																													4		normgene->intron
7893362					---	---	---	---	---	pos_control																													1		normgene->exon
7893363					---	---	---	---	---	pos_control																													4		normgene->exon
7893364					---	---	---	---	---	pos_control																													4		normgene->exon
7893365					---	---	---	---	---	neg_control																													4		normgene->intron
7893366					---	---	---	---	---	neg_control																													4		normgene->intron
7893367					---	---	---	---	---	neg_control																													4		normgene->intron
7893368					---	---	---	---	---	---																													442		control->bgp->antigenomic
7893369					---	---	---	---	---	neg_control																													4		normgene->intron
7893370					---	---	---	---	---	neg_control																													4		normgene->intron
7893371					---	---	---	---	---	pos_control																													4		normgene->exon
7893372					---	---	---	---	---	neg_control																													1		normgene->intron
7893373					---	---	---	---	---	neg_control																													3		normgene->intron
7893374					---	---	---	---	---	pos_control																													4		normgene->exon
7893375					---	---	---	---	---	neg_control																													4		normgene->intron
7893376					---	---	---	---	---	neg_control																													3		normgene->intron
7893377					---	---	---	---	---	neg_control																													4		normgene->intron
7893378					---	---	---	---	---	neg_control																													4		normgene->intron
7893379					---	---	---	---	---	neg_control																													4		normgene->intron
7893380					---	---	---	---	---	neg_control																													4		normgene->intron
7893381					---	---	---	---	---	neg_control																													4		normgene->intron
7893382					---	---	---	---	---	pos_control																													4		normgene->exon
7893383					---	---	---	---	---	neg_control																													4		normgene->intron
7893384					---	---	---	---	---	pos_control																													4		normgene->exon
7893385					---	---	---	---	---	pos_control																													4		normgene->exon
7893386					---	---	---	---	---	pos_control																													4		normgene->exon
7893387					---	---	---	---	---	neg_control																													4		normgene->intron
7893388					---	---	---	---	---	neg_control																													4		normgene->intron
7893389					---	---	---	---	---	neg_control																													4		normgene->intron
7893390					---	---	---	---	---	pos_control																													3		normgene->exon
7893391					---	---	---	---	---	neg_control																													4		normgene->intron
7893392					---	---	---	---	---	pos_control																													4		normgene->exon
7893393					---	---	---	---	---	pos_control																													2		normgene->exon
7893394					---	---	---	---	---	pos_control																													4		normgene->exon
7893395					---	---	---	---	---	pos_control																													4		normgene->exon
7893396					---	---	---	---	---	neg_control																													4		normgene->intron
7893397					---	---	---	---	---	neg_control																													4		normgene->intron
7893398					---	---	---	---	---	neg_control																													4		normgene->intron
7893399					---	---	---	---	---	pos_control																													4		normgene->exon
7893400					---	---	---	---	---	neg_control																													4		normgene->intron
7893401					---	---	---	---	---	neg_control																													4		normgene->intron
7893402					---	---	---	---	---	neg_control																													4		normgene->intron
7893403					---	---	---	---	---	neg_control																													4		normgene->intron
7893404					---	---	---	---	---	neg_control																													4		normgene->intron
7893405					---	---	---	---	---	neg_control																													4		normgene->intron
7893406					---	---	---	---	---	neg_control																													1		normgene->intron
7893407					---	---	---	---	---	pos_control																													4		normgene->exon
7893408					---	---	---	---	---	neg_control																													4		normgene->intron
7893409					---	---	---	---	---	---																													472		control->bgp->antigenomic
7893410					---	---	---	---	---	neg_control																													4		normgene->intron
7893411					---	---	---	---	---	neg_control																													4		normgene->intron
7893412					---	---	---	---	---	neg_control																													4		normgene->intron
7893413					---	---	---	---	---	pos_control																													4		normgene->exon
7893414					---	---	---	---	---	neg_control																													4		normgene->intron
7893415					---	---	---	---	---	neg_control																													4		normgene->intron
7893416					---	---	---	---	---	neg_control																													4		normgene->intron
7893417					---	---	---	---	---	neg_control																													2		normgene->intron
7893418					---	---	---	---	---	neg_control																													4		normgene->intron
7893419					---	---	---	---	---	pos_control																													4		normgene->exon
7893420					---	---	---	---	---	pos_control																													4		normgene->exon
7893421					---	---	---	---	---	neg_control																													4		normgene->intron
7893422					---	---	---	---	---	pos_control																													4		normgene->exon
7893423					---	---	---	---	---	neg_control																													4		normgene->intron
7893424					---	---	---	---	---	pos_control																													4		normgene->exon
7893425					---	---	---	---	---	neg_control																													4		normgene->intron
7893426					---	---	---	---	---	---																													480		control->bgp->antigenomic
7893427					---	---	---	---	---	neg_control																													4		normgene->intron
7893428					---	---	---	---	---	neg_control																													4		normgene->intron
7893429					---	---	---	---	---	neg_control																													4		normgene->intron
7893430					---	---	---	---	---	neg_control																													4		normgene->intron
7893431					---	---	---	---	---	neg_control																													4		normgene->intron
7893432					---	---	---	---	---	neg_control																													4		normgene->intron
7893433					---	---	---	---	---	neg_control																													4		normgene->intron
7893434					---	---	---	---	---	neg_control																													4		normgene->intron
7893435					---	---	---	---	---	neg_control																													4		normgene->intron
7893436					---	---	---	---	---	neg_control																													4		normgene->intron
7893437					---	---	---	---	---	neg_control																													4		normgene->intron
7893438					---	---	---	---	---	neg_control																													4		normgene->intron
7893439					---	---	---	---	---	pos_control																													4		normgene->exon
7893440					---	---	---	---	---	neg_control																													4		normgene->intron
7893441					---	---	---	---	---	pos_control																													1		normgene->exon
7893442					---	---	---	---	---	neg_control																													4		normgene->intron
7893443					---	---	---	---	---	pos_control																													4		normgene->exon
7893444					---	---	---	---	---	neg_control																													4		normgene->intron
7893445					---	---	---	---	---	neg_control																													3		normgene->intron
7893446					---	---	---	---	---	neg_control																													4		normgene->intron
7893447					---	---	---	---	---	pos_control																													4		normgene->exon
7893448					---	---	---	---	---	neg_control																													2		normgene->intron
7893449					---	---	---	---	---	pos_control																													4		normgene->exon
7893450					---	---	---	---	---	neg_control																													4		normgene->intron
7893451					---	---	---	---	---	neg_control																													4		normgene->intron
7893452					---	---	---	---	---	neg_control																													2		normgene->intron
7893453					---	---	---	---	---	pos_control																													4		normgene->exon
7893454					---	---	---	---	---	pos_control																													2		normgene->exon
7893455					---	---	---	---	---	pos_control																													4		normgene->exon
7893456					---	---	---	---	---	neg_control																													4		normgene->intron
7893457					---	---	---	---	---	neg_control																													4		normgene->intron
7893458					---	---	---	---	---	pos_control																													4		normgene->exon
7893459					---	---	---	---	---	neg_control																													4		normgene->intron
7893460					---	---	---	---	---	pos_control																													4		normgene->exon
7893461					---	---	---	---	---	pos_control																													4		normgene->exon
7893462					---	---	---	---	---	neg_control																													4		normgene->intron
7893463					---	---	---	---	---	pos_control																													4		normgene->exon
7893464					---	---	---	---	---	neg_control																													4		normgene->intron
7893465					---	---	---	---	---	neg_control																													3		normgene->intron
7893466					---	---	---	---	---	pos_control																													4		normgene->exon
7893467					---	---	---	---	---	pos_control																													4		normgene->exon
7893468					---	---	---	---	---	neg_control																													4		normgene->intron
7893469					---	---	---	---	---	neg_control																													4		normgene->intron
7893470					---	---	---	---	---	neg_control																													4		normgene->intron
7893471					---	---	---	---	---	neg_control																													4		normgene->intron
7893472					---	---	---	---	---	neg_control																													4		normgene->intron
7893473					---	---	---	---	---	neg_control																													2		normgene->intron
7893474					---	---	---	---	---	neg_control																													4		normgene->intron
7893475					---	---	---	---	---	neg_control																													4		normgene->intron
7893476					---	---	---	---	---	pos_control																													4		normgene->exon
7893477					---	---	---	---	---	pos_control																													4		normgene->exon
7893478					---	---	---	---	---	neg_control																													4		normgene->intron
7893479					---	---	---	---	---	neg_control																													4		normgene->intron
7893480					---	---	---	---	---	neg_control																													4		normgene->intron
7893481					---	---	---	---	---	pos_control																													4		normgene->exon
7893482					---	---	---	---	---	neg_control																													4		normgene->intron
7893483					---	---	---	---	---	neg_control																													4		normgene->intron
7893484					---	---	---	---	---	neg_control																													1		normgene->intron
7893485					---	---	---	---	---	pos_control																													4		normgene->exon
7893486					---	---	---	---	---	pos_control																													4		normgene->exon
7893487					---	---	---	---	---	neg_control																													4		normgene->intron
7893488					---	---	---	---	---	neg_control																													4		normgene->intron
7893489					---	---	---	---	---	neg_control																													4		normgene->intron
7893490					---	---	---	---	---	neg_control																													4		normgene->intron
7893491					---	---	---	---	---	neg_control																													4		normgene->intron
7893492					---	---	---	---	---	neg_control																													1		normgene->intron
7893493					---	---	---	---	---	neg_control																													4		normgene->intron
7893494					---	---	---	---	---	pos_control																													4		normgene->exon
7893495					---	---	---	---	---	neg_control																													4		normgene->intron
7893496					---	---	---	---	---	neg_control																													4		normgene->intron
7893497					---	---	---	---	---	pos_control																													4		normgene->exon
7893498					---	---	---	---	---	neg_control																													4		normgene->intron
7893499					---	---	---	---	---	neg_control																													4		normgene->intron
7893500					---	---	---	---	---	pos_control																													3		normgene->exon
7893501					---	---	---	---	---	neg_control																													2		normgene->intron
7893502					---	---	---	---	---	neg_control																													4		normgene->intron
7893503					---	---	---	---	---	neg_control																													4		normgene->intron
7893504					---	---	---	---	---	pos_control																													4		normgene->exon
7893505					---	---	---	---	---	neg_control																													4		normgene->intron
7893506					---	---	---	---	---	pos_control																													4		normgene->exon
7893507					---	---	---	---	---	neg_control																													4		normgene->intron
7893508					---	---	---	---	---	neg_control																													4		normgene->intron
7893509					---	---	---	---	---	neg_control																													4		normgene->intron
7893510					---	---	---	---	---	neg_control																													4		normgene->intron
7893511					---	---	---	---	---	neg_control																													4		normgene->intron
7893512					---	---	---	---	---	neg_control																													4		normgene->intron
7893513					---	---	---	---	---	neg_control																													4		normgene->intron
7893514					---	---	---	---	---	neg_control																													4		normgene->intron
7893515					---	---	---	---	---	neg_control																													4		normgene->intron
7893516					---	---	---	---	---	pos_control																													4		normgene->exon
7893517					---	---	---	---	---	pos_control																													4		normgene->exon
7893518					---	---	---	---	---	pos_control																													4		normgene->exon
7893519					---	---	---	---	---	neg_control																													4		normgene->intron
7893520					---	---	---	---	---	neg_control																													4		normgene->intron
7893521					---	---	---	---	---	neg_control																													4		normgene->intron
7893522					---	---	---	---	---	neg_control																													4		normgene->intron
7893523					---	---	---	---	---	neg_control																													4		normgene->intron
7893524					---	---	---	---	---	neg_control																													4		normgene->intron
7893525					---	---	---	---	---	neg_control																													3		normgene->intron
7893526					---	---	---	---	---	neg_control																													4		normgene->intron
7893527					---	---	---	---	---	neg_control																													4		normgene->intron
7893528					---	---	---	---	---	pos_control																													1		normgene->exon
7893529					---	---	---	---	---	neg_control																													4		normgene->intron
7893530					---	---	---	---	---	pos_control																													4		normgene->exon
7893531					---	---	---	---	---	neg_control																													4		normgene->intron
7893532					---	---	---	---	---	neg_control																													1		normgene->intron
7893533					---	---	---	---	---	neg_control																													4		normgene->intron
7893534					---	---	---	---	---	pos_control																													4		normgene->exon
7893535					---	---	---	---	---	neg_control																													4		normgene->intron
7893536					---	---	---	---	---	neg_control																													4		normgene->intron
7893537					---	---	---	---	---	neg_control																													4		normgene->intron
7893538					---	---	---	---	---	neg_control																													4		normgene->intron
7893539					---	---	---	---	---	pos_control																													4		normgene->exon
7893540					---	---	---	---	---	neg_control																													4		normgene->intron
7893541					---	---	---	---	---	neg_control																													4		normgene->intron
7893542					---	---	---	---	---	neg_control																													4		normgene->intron
7893543					---	---	---	---	---	pos_control																													4		normgene->exon
7893544					---	---	---	---	---	pos_control																													4		normgene->exon
7893545					---	---	---	---	---	neg_control																													4		normgene->intron
7893546					---	---	---	---	---	neg_control																													4		normgene->intron
7893547					---	---	---	---	---	pos_control																													4		normgene->exon
7893548					---	---	---	---	---	neg_control																													4		normgene->intron
7893549					---	---	---	---	---	pos_control																													4		normgene->exon
7893550					---	---	---	---	---	pos_control																													4		normgene->exon
7893551					---	---	---	---	---	pos_control																													4		normgene->exon
7893552					---	---	---	---	---	pos_control																													4		normgene->exon
7893553					---	---	---	---	---	neg_control																													4		normgene->intron
7893554					---	---	---	---	---	pos_control																													4		normgene->exon
7893555					---	---	---	---	---	neg_control																													3		normgene->intron
7893556					---	---	---	---	---	neg_control																													4		normgene->intron
7893557					---	---	---	---	---	neg_control																													4		normgene->intron
7893558					---	---	---	---	---	pos_control																													4		normgene->exon
7893559					---	---	---	---	---	pos_control																													4		normgene->exon
7893560					---	---	---	---	---	neg_control																													4		normgene->intron
7893561					---	---	---	---	---	pos_control																													4		normgene->exon
7893562					---	---	---	---	---	neg_control																													4		normgene->intron
7893563					---	---	---	---	---	neg_control																													4		normgene->intron
7893564					---	---	---	---	---	pos_control																													4		normgene->exon
7893565					---	---	---	---	---	neg_control																													4		normgene->intron
7893566					---	---	---	---	---	neg_control																													4		normgene->intron
7893567					---	---	---	---	---	neg_control																													4		normgene->intron
7893568					---	---	---	---	---	pos_control																													4		normgene->exon
7893569					---	---	---	---	---	neg_control																													4		normgene->intron
7893570					---	---	---	---	---	neg_control																													1		normgene->intron
7893571					---	---	---	---	---	pos_control																													4		normgene->exon
7893572					---	---	---	---	---	pos_control																													4		normgene->exon
7893573					---	---	---	---	---	pos_control																													1		normgene->exon
7893574					---	---	---	---	---	pos_control																													4		normgene->exon
7893575					---	---	---	---	---	neg_control																													4		normgene->intron
7893576					---	---	---	---	---	neg_control																													3		normgene->intron
7893577					---	---	---	---	---	neg_control																													4		normgene->intron
7893578					---	---	---	---	---	neg_control																													4		normgene->intron
7893579					---	---	---	---	---	neg_control																													4		normgene->intron
7893580					---	---	---	---	---	neg_control																													4		normgene->intron
7893581					---	---	---	---	---	neg_control																													4		normgene->intron
7893582					---	---	---	---	---	pos_control																													4		normgene->exon
7893583					---	---	---	---	---	neg_control																													4		normgene->intron
7893584					---	---	---	---	---	neg_control																													4		normgene->intron
7893585					---	---	---	---	---	neg_control																													4		normgene->intron
7893586					---	---	---	---	---	neg_control																													4		normgene->intron
7893587					---	---	---	---	---	pos_control																													4		normgene->exon
7893588					---	---	---	---	---	neg_control																													4		normgene->intron
7893589					---	---	---	---	---	neg_control																													4		normgene->intron
7893590					---	---	---	---	---	neg_control																													4		normgene->intron
7893591					---	---	---	---	---	pos_control																													4		normgene->exon
7893592					---	---	---	---	---	pos_control																													4		normgene->exon
7893593					---	---	---	---	---	pos_control																													4		normgene->exon
7893594					---	---	---	---	---	pos_control																													4		normgene->exon
7893595					---	---	---	---	---	neg_control																													3		normgene->intron
7893596					---	---	---	---	---	neg_control																													4		normgene->intron
7893597					---	---	---	---	---	neg_control																													4		normgene->intron
7893598					---	---	---	---	---	neg_control																													4		normgene->intron
7893599					---	---	---	---	---	neg_control																													4		normgene->intron
7893600					---	---	---	---	---	neg_control																													4		normgene->intron
7893601					---	---	---	---	---	neg_control																													4		normgene->intron
7893602					---	---	---	---	---	pos_control																													4		normgene->exon
7893603					---	---	---	---	---	pos_control																													4		normgene->exon
7893604					---	---	---	---	---	neg_control																													4		normgene->intron
7893605					---	---	---	---	---	neg_control																													4		normgene->intron
7893606					---	---	---	---	---	neg_control																													4		normgene->intron
7893607					---	---	---	---	---	neg_control																													4		normgene->intron
7893608					---	---	---	---	---	pos_control																													4		normgene->exon
7893609					---	---	---	---	---	pos_control																													4		normgene->exon
7893610					---	---	---	---	---	neg_control																													4		normgene->intron
7893611					---	---	---	---	---	neg_control																													4		normgene->intron
7893612					---	---	---	---	---	neg_control																													4		normgene->intron
7893613					---	---	---	---	---	AFFX-BioB-3_at, bac_spike																													20		control->affx
7893614					---	---	---	---	---	neg_control																													4		normgene->intron
7893615					---	---	---	---	---	neg_control																													1		normgene->intron
7893616					---	---	---	---	---	neg_control																													4		normgene->intron
7893617					---	---	---	---	---	neg_control																													1		normgene->intron
7893618					---	---	---	---	---	neg_control																													4		normgene->intron
7893619					---	---	---	---	---	pos_control																													3		normgene->exon
7893620					---	---	---	---	---	neg_control																													1		normgene->intron
7893621					---	---	---	---	---	neg_control																													2		normgene->intron
7893622					---	---	---	---	---	neg_control																													1		normgene->intron
7893623					---	---	---	---	---	neg_control																													4		normgene->intron
7893624					---	---	---	---	---	neg_control																													4		normgene->intron
7893625					---	---	---	---	---	---																													477		control->bgp->antigenomic
7893626					---	---	---	---	---	neg_control																													4		normgene->intron
7893627					---	---	---	---	---	neg_control																													4		normgene->intron
7893628					---	---	---	---	---	pos_control																													4		normgene->exon
7893629					---	---	---	---	---	neg_control																													4		normgene->intron
7893630					---	---	---	---	---	pos_control																													3		normgene->exon
7893631					---	---	---	---	---	neg_control																													4		normgene->intron
7893632					---	---	---	---	---	pos_control																													4		normgene->exon
7893633					---	---	---	---	---	neg_control																													4		normgene->intron
7893634					---	---	---	---	---	neg_control																													4		normgene->intron
7893635					---	---	---	---	---	neg_control																													4		normgene->intron
7893636					---	---	---	---	---	neg_control																													4		normgene->intron
7893637					---	---	---	---	---	neg_control																													2		normgene->intron
7893638					---	---	---	---	---	neg_control																													4		normgene->intron
7893639					---	---	---	---	---	pos_control																													2		normgene->exon
7893640					---	---	---	---	---	pos_control																													4		normgene->exon
7893641					---	---	---	---	---	pos_control																													4		normgene->exon
7893642					---	---	---	---	---	pos_control																													4		normgene->exon
7893643					---	---	---	---	---	---																													489		control->bgp->antigenomic
7893644					---	---	---	---	---	neg_control																													4		normgene->intron
7893645					---	---	---	---	---	neg_control																													4		normgene->intron
7893646					---	---	---	---	---	neg_control																													4		normgene->intron
7893647					---	---	---	---	---	pos_control																													4		normgene->exon
7893648					---	---	---	---	---	neg_control																													4		normgene->intron
7893649					---	---	---	---	---	pos_control																													4		normgene->exon
7893650					---	---	---	---	---	pos_control																													4		normgene->exon
7893651					---	---	---	---	---	neg_control																													4		normgene->intron
7893652					---	---	---	---	---	neg_control																													4		normgene->intron
7893653					---	---	---	---	---	neg_control																													1		normgene->intron
7893654					---	---	---	---	---	neg_control																													4		normgene->intron
7893655					---	---	---	---	---	neg_control																													4		normgene->intron
7893656					---	---	---	---	---	neg_control																													4		normgene->intron
7893657					---	---	---	---	---	pos_control																													4		normgene->exon
7893658					---	---	---	---	---	neg_control																													4		normgene->intron
7893659					---	---	---	---	---	neg_control																													4		normgene->intron
7893660					---	---	---	---	---	neg_control																													4		normgene->intron
7893661					---	---	---	---	---	neg_control																													4		normgene->intron
7893662					---	---	---	---	---	pos_control																													4		normgene->exon
7893663					---	---	---	---	---	neg_control																													4		normgene->intron
7893664					---	---	---	---	---	pos_control																													4		normgene->exon
7893665					---	---	---	---	---	neg_control																													4		normgene->intron
7893666					---	---	---	---	---	neg_control																													4		normgene->intron
7893667					---	---	---	---	---	neg_control																													4		normgene->intron
7893668					---	---	---	---	---	neg_control																													1		normgene->intron
7893669					---	---	---	---	---	neg_control																													4		normgene->intron
7893670					---	---	---	---	---	neg_control																													4		normgene->intron
7893671					---	---	---	---	---	neg_control																													4		normgene->intron
7893672					---	---	---	---	---	neg_control																													1		normgene->intron
7893673					---	---	---	---	---	neg_control																													3		normgene->intron
7893674					---	---	---	---	---	neg_control																													3		normgene->intron
7893675					---	---	---	---	---	neg_control																													4		normgene->intron
7893676					---	---	---	---	---	pos_control																													4		normgene->exon
7893677					---	---	---	---	---	neg_control																													4		normgene->intron
7893678					---	---	---	---	---	neg_control																													2		normgene->intron
7893679					---	---	---	---	---	neg_control																													4		normgene->intron
7893681					---	---	---	---	---	pos_control																													1		normgene->exon
7893682					---	---	---	---	---	pos_control																													4		normgene->exon
7893683					---	---	---	---	---	neg_control																													4		normgene->intron
7893684					---	---	---	---	---	pos_control																													4		normgene->exon
7893685					---	---	---	---	---	pos_control																													4		normgene->exon
7893686					---	---	---	---	---	neg_control																													2		normgene->intron
7893687					---	---	---	---	---	---																													463		control->bgp->antigenomic
7893688					---	---	---	---	---	neg_control																													4		normgene->intron
7893689					---	---	---	---	---	neg_control																													4		normgene->intron
7893690					---	---	---	---	---	pos_control																													4		normgene->exon
7893691					---	---	---	---	---	neg_control																													4		normgene->intron
7893692					---	---	---	---	---	neg_control																													4		normgene->intron
7893693					---	---	---	---	---	neg_control																													4		normgene->intron
7893694					---	---	---	---	---	neg_control																													1		normgene->intron
7893695					---	---	---	---	---	neg_control																													4		normgene->intron
7893696					---	---	---	---	---	neg_control																													4		normgene->intron
7893697					---	---	---	---	---	neg_control																													4		normgene->intron
7893698					---	---	---	---	---	neg_control																													4		normgene->intron
7893699					---	---	---	---	---	neg_control																													4		normgene->intron
7893700					---	---	---	---	---	pos_control																													4		normgene->exon
7893701					---	---	---	---	---	neg_control																													4		normgene->intron
7893702					---	---	---	---	---	neg_control																													2		normgene->intron
7893703					---	---	---	---	---	neg_control																													4		normgene->intron
7893704					---	---	---	---	---	neg_control																													4		normgene->intron
7893705					---	---	---	---	---	neg_control																													4		normgene->intron
7893706					---	---	---	---	---	neg_control																													4		normgene->intron
7893707					---	---	---	---	---	neg_control																													4		normgene->intron
7893708					---	---	---	---	---	neg_control																													4		normgene->intron
7893709					---	---	---	---	---	pos_control																													4		normgene->exon
7893710					---	---	---	---	---	neg_control																													4		normgene->intron
7893711					---	---	---	---	---	pos_control																													4		normgene->exon
7893712					---	---	---	---	---	neg_control																													4		normgene->intron
7893713					---	---	---	---	---	neg_control																													4		normgene->intron
7893714					---	---	---	---	---	pos_control																													4		normgene->exon
7893715					---	---	---	---	---	pos_control																													4		normgene->exon
7893716					---	---	---	---	---	neg_control																													4		normgene->intron
7893717					---	---	---	---	---	pos_control																													4		normgene->exon
7893718					---	---	---	---	---	neg_control																													4		normgene->intron
7893719					---	---	---	---	---	neg_control																													4		normgene->intron
7893720					---	---	---	---	---	neg_control																													4		normgene->intron
7893721					---	---	---	---	---	pos_control																													4		normgene->exon
7893722					---	---	---	---	---	neg_control																													3		normgene->intron
7893723					---	---	---	---	---	neg_control																													4		normgene->intron
7893724					---	---	---	---	---	neg_control																													4		normgene->intron
7893725					---	---	---	---	---	neg_control																													4		normgene->intron
7893726					---	---	---	---	---	neg_control																													4		normgene->intron
7893727					---	---	---	---	---	pos_control																													4		normgene->exon
7893728					---	---	---	---	---	neg_control																													4		normgene->intron
7893729					---	---	---	---	---	pos_control																													4		normgene->exon
7893730					---	---	---	---	---	neg_control																													4		normgene->intron
7893731					---	---	---	---	---	neg_control																													4		normgene->intron
7893732					---	---	---	---	---	pos_control																													2		normgene->exon
7893733					---	---	---	---	---	pos_control																													4		normgene->exon
7893734					---	---	---	---	---	pos_control																													4		normgene->exon
7893735					---	---	---	---	---	neg_control																													4		normgene->intron
7893736					---	---	---	---	---	neg_control																													4		normgene->intron
7893737					---	---	---	---	---	neg_control																													4		normgene->intron
7893738					---	---	---	---	---	pos_control																													4		normgene->exon
7893739					---	---	---	---	---	neg_control																													1		normgene->intron
7893740					---	---	---	---	---	pos_control																													4		normgene->exon
7893741					---	---	---	---	---	neg_control																													4		normgene->intron
7893742					---	---	---	---	---	neg_control																													4		normgene->intron
7893743					---	---	---	---	---	neg_control																													4		normgene->intron
7893744					---	---	---	---	---	neg_control																													4		normgene->intron
7893745					---	---	---	---	---	pos_control																													4		normgene->exon
7893746					---	---	---	---	---	neg_control																													4		normgene->intron
7893747					---	---	---	---	---	pos_control																													4		normgene->exon
7893748					---	---	---	---	---	neg_control																													3		normgene->intron
7893749					---	---	---	---	---	neg_control																													4		normgene->intron
7893750					---	---	---	---	---	neg_control																													3		normgene->intron
7893751					---	---	---	---	---	neg_control																													4		normgene->intron
7893752					---	---	---	---	---	pos_control																													4		normgene->exon
7893753					---	---	---	---	---	neg_control																													4		normgene->intron
7893754					---	---	---	---	---	neg_control																													4		normgene->intron
7893755					---	---	---	---	---	neg_control																													4		normgene->intron
7893756					---	---	---	---	---	neg_control																													4		normgene->intron
7893757					---	---	---	---	---	neg_control																													4		normgene->intron
7893758					---	---	---	---	---	neg_control																													4		normgene->intron
7893759					---	---	---	---	---	pos_control																													4		normgene->exon
7893760					---	---	---	---	---	neg_control																													4		normgene->intron
7893761					---	---	---	---	---	neg_control																													4		normgene->intron
7893762					---	---	---	---	---	pos_control																													3		normgene->exon
7893763					---	---	---	---	---	pos_control																													4		normgene->exon
7893764					---	---	---	---	---	neg_control																													4		normgene->intron
7893765					---	---	---	---	---	neg_control																													4		normgene->intron
7893766					---	---	---	---	---	neg_control																													1		normgene->intron
7893767					---	---	---	---	---	neg_control																													4		normgene->intron
7893768					---	---	---	---	---	neg_control																													4		normgene->intron
7893769					---	---	---	---	---	pos_control																													4		normgene->exon
7893770					---	---	---	---	---	neg_control																													4		normgene->intron
7893771					---	---	---	---	---	neg_control																													4		normgene->intron
7893772					---	---	---	---	---	neg_control																													4		normgene->intron
7893773					---	---	---	---	---	pos_control																													4		normgene->exon
7893774					---	---	---	---	---	pos_control																													3		normgene->exon
7893775					---	---	---	---	---	neg_control																													4		normgene->intron
7893776					---	---	---	---	---	neg_control																													4		normgene->intron
7893777					---	---	---	---	---	pos_control																													4		normgene->exon
7893778					---	---	---	---	---	pos_control																													4		normgene->exon
7893779					---	---	---	---	---	pos_control																													4		normgene->exon
7893780					---	---	---	---	---	neg_control																													4		normgene->intron
7893781					---	---	---	---	---	neg_control																													4		normgene->intron
7893782					---	---	---	---	---	pos_control																													4		normgene->exon
7893783					---	---	---	---	---	neg_control																													4		normgene->intron
7893784					---	---	---	---	---	neg_control																													4		normgene->intron
7893785					---	---	---	---	---	pos_control																													4		normgene->exon
7893786					---	---	---	---	---	neg_control																													4		normgene->intron
7893787					---	---	---	---	---	pos_control																													4		normgene->exon
7893788					---	---	---	---	---	pos_control																													1		normgene->exon
7893789					---	---	---	---	---	neg_control																													3		normgene->intron
7893790					---	---	---	---	---	neg_control																													4		normgene->intron
7893791					---	---	---	---	---	neg_control																													4		normgene->intron
7893792					---	---	---	---	---	pos_control																													4		normgene->exon
7893793					---	---	---	---	---	pos_control																													4		normgene->exon
7893794					---	---	---	---	---	neg_control																													4		normgene->intron
7893795					---	---	---	---	---	neg_control																													4		normgene->intron
7893796					---	---	---	---	---	pos_control																													4		normgene->exon
7893797					---	---	---	---	---	neg_control																													4		normgene->intron
7893798					---	---	---	---	---	pos_control																													4		normgene->exon
7893799					---	---	---	---	---	neg_control																													4		normgene->intron
7893800					---	---	---	---	---	neg_control																													4		normgene->intron
7893801					---	---	---	---	---	neg_control																													4		normgene->intron
7893802					---	---	---	---	---	neg_control																													4		normgene->intron
7893803					---	---	---	---	---	neg_control																													4		normgene->intron
7893804					---	---	---	---	---	neg_control																													4		normgene->intron
7893805					---	---	---	---	---	neg_control																													4		normgene->intron
7893806					---	---	---	---	---	pos_control																													4		normgene->exon
7893807					---	---	---	---	---	neg_control																													4		normgene->intron
7893808					---	---	---	---	---	pos_control																													4		normgene->exon
7893809					---	---	---	---	---	neg_control																													4		normgene->intron
7893810					---	---	---	---	---	neg_control																													1		normgene->intron
7893811					---	---	---	---	---	neg_control																													4		normgene->intron
7893812					---	---	---	---	---	neg_control																													4		normgene->intron
7893813					---	---	---	---	---	neg_control																													4		normgene->intron
7893814					---	---	---	---	---	pos_control																													1		normgene->exon
7893815					---	---	---	---	---	pos_control																													4		normgene->exon
7893816					---	---	---	---	---	pos_control																													4		normgene->exon
7893817					---	---	---	---	---	neg_control																													4		normgene->intron
7893818					---	---	---	---	---	neg_control																													4		normgene->intron
7893819					---	---	---	---	---	neg_control																													4		normgene->intron
7893820					---	---	---	---	---	neg_control																													4		normgene->intron
7893821					---	---	---	---	---	pos_control																													4		normgene->exon
7893822					---	---	---	---	---	pos_control																													4		normgene->exon
7893823					---	---	---	---	---	neg_control																													4		normgene->intron
7893824					---	---	---	---	---	neg_control																													4		normgene->intron
7893825					---	---	---	---	---	neg_control																													2		normgene->intron
7893826					---	---	---	---	---	neg_control																													4		normgene->intron
7893827					---	---	---	---	---	pos_control																													4		normgene->exon
7893828					---	---	---	---	---	neg_control																													4		normgene->intron
7893829					---	---	---	---	---	neg_control																													4		normgene->intron
7893830					---	---	---	---	---	neg_control																													4		normgene->intron
7893831					---	---	---	---	---	neg_control																													4		normgene->intron
7893832					---	---	---	---	---	neg_control																													4		normgene->intron
7893833					---	---	---	---	---	neg_control																													4		normgene->intron
7893834					---	---	---	---	---	pos_control																													4		normgene->exon
7893835					---	---	---	---	---	neg_control																													2		normgene->intron
7893836					---	---	---	---	---	neg_control																													4		normgene->intron
7893837					---	---	---	---	---	neg_control																													4		normgene->intron
7893838					---	---	---	---	---	neg_control																													4		normgene->intron
7893839					---	---	---	---	---	neg_control																													4		normgene->intron
7893840					---	---	---	---	---	pos_control																													4		normgene->exon
7893841					---	---	---	---	---	neg_control																													4		normgene->intron
7893842					---	---	---	---	---	neg_control																													4		normgene->intron
7893843					---	---	---	---	---	neg_control																													4		normgene->intron
7893844					---	---	---	---	---	neg_control																													4		normgene->intron
7893845					---	---	---	---	---	neg_control																													4		normgene->intron
7893846					---	---	---	---	---	neg_control																													4		normgene->intron
7893847					---	---	---	---	---	neg_control																													4		normgene->intron
7893848					---	---	---	---	---	neg_control																													4		normgene->intron
7893849					---	---	---	---	---	neg_control																													4		normgene->intron
7893850					---	---	---	---	---	pos_control																													2		normgene->exon
7893851					---	---	---	---	---	neg_control																													4		normgene->intron
7893853					---	---	---	---	---	pos_control																													4		normgene->exon
7893854					---	---	---	---	---	neg_control																													4		normgene->intron
7893855					---	---	---	---	---	pos_control																													4		normgene->exon
7893856					---	---	---	---	---	pos_control																													4		normgene->exon
7893857					---	---	---	---	---	neg_control																													2		normgene->intron
7893858					---	---	---	---	---	neg_control																													4		normgene->intron
7893859					---	---	---	---	---	neg_control																													4		normgene->intron
7893860					---	---	---	---	---	neg_control																													2		normgene->intron
7893861					---	---	---	---	---	neg_control																													4		normgene->intron
7893862					---	---	---	---	---	neg_control																													1		normgene->intron
7893863					---	---	---	---	---	neg_control																													4		normgene->intron
7893864					---	---	---	---	---	neg_control																													4		normgene->intron
7893865					---	---	---	---	---	neg_control																													4		normgene->intron
7893866					---	---	---	---	---	neg_control																													4		normgene->intron
7893867					---	---	---	---	---	neg_control																													4		normgene->intron
7893868					---	---	---	---	---	neg_control																													4		normgene->intron
7893869					---	---	---	---	---	neg_control																													4		normgene->intron
7893870					---	---	---	---	---	pos_control																													4		normgene->exon
7893871					---	---	---	---	---	neg_control																													4		normgene->intron
7893872					---	---	---	---	---	neg_control																													4		normgene->intron
7893873					---	---	---	---	---	neg_control																													2		normgene->intron
7893874					---	---	---	---	---	neg_control																													2		normgene->intron
7893875					---	---	---	---	---	neg_control																													4		normgene->intron
7893876					---	---	---	---	---	neg_control																													4		normgene->intron
7893877					---	---	---	---	---	neg_control																													4		normgene->intron
7893878					---	---	---	---	---	neg_control																													4		normgene->intron
7893879					---	---	---	---	---	neg_control																													4		normgene->intron
7893880					---	---	---	---	---	pos_control																													4		normgene->exon
7893881					---	---	---	---	---	neg_control																													4		normgene->intron
7893882					---	---	---	---	---	neg_control																													3		normgene->intron
7893883					---	---	---	---	---	pos_control																													4		normgene->exon
7893884					---	---	---	---	---	neg_control																													4		normgene->intron
7893885					---	---	---	---	---	neg_control																													1		normgene->intron
7893886					---	---	---	---	---	pos_control																													4		normgene->exon
7893887					---	---	---	---	---	neg_control																													4		normgene->intron
7893888					---	---	---	---	---	pos_control																													4		normgene->exon
7893889					---	---	---	---	---	neg_control																													4		normgene->intron
7893890					---	---	---	---	---	neg_control																													4		normgene->intron
7893891					---	---	---	---	---	neg_control																													4		normgene->intron
7893892					---	---	---	---	---	pos_control																													4		normgene->exon
7893893					---	---	---	---	---	neg_control																													4		normgene->intron
7893894					---	---	---	---	---	neg_control																													4		normgene->intron
7893895					---	---	---	---	---	neg_control																													4		normgene->intron
7893896					---	---	---	---	---	neg_control																													4		normgene->intron
7893897					---	---	---	---	---	neg_control																													4		normgene->intron
7893898					---	---	---	---	---	neg_control																													4		normgene->intron
7893899					---	---	---	---	---	neg_control																													4		normgene->intron
7893900					---	---	---	---	---	neg_control																													4		normgene->intron
7893901					---	---	---	---	---	neg_control																													4		normgene->intron
7893902					---	---	---	---	---	neg_control																													4		normgene->intron
7893904					---	---	---	---	---	pos_control																													4		normgene->exon
7893905					---	---	---	---	---	pos_control																													4		normgene->exon
7893906					---	---	---	---	---	neg_control																													4		normgene->intron
7893907					---	---	---	---	---	neg_control																													1		normgene->intron
7893908					---	---	---	---	---	pos_control																													4		normgene->exon
7893909					---	---	---	---	---	neg_control																													4		normgene->intron
7893910					---	---	---	---	---	pos_control																													4		normgene->exon
7893911					---	---	---	---	---	neg_control																													4		normgene->intron
7893912					---	---	---	---	---	neg_control																													3		normgene->intron
7893913					---	---	---	---	---	pos_control																													4		normgene->exon
7893914					---	---	---	---	---	neg_control																													4		normgene->intron
7893915					---	---	---	---	---	neg_control																													4		normgene->intron
7893916					---	---	---	---	---	neg_control																													4		normgene->intron
7893917					---	---	---	---	---	neg_control																													4		normgene->intron
7893918					---	---	---	---	---	pos_control																													4		normgene->exon
7893919					---	---	---	---	---	pos_control																													4		normgene->exon
7893920					---	---	---	---	---	neg_control																													4		normgene->intron
7893921					---	---	---	---	---	pos_control																													4		normgene->exon
7893922					---	---	---	---	---	pos_control																													4		normgene->exon
7893923					---	---	---	---	---	pos_control																													4		normgene->exon
7893924					---	---	---	---	---	neg_control																													1		normgene->intron
7893925					---	---	---	---	---	neg_control																													4		normgene->intron
7893926					---	---	---	---	---	pos_control																													4		normgene->exon
7893927					---	---	---	---	---	neg_control																													4		normgene->intron
7893928					---	---	---	---	---	pos_control																													4		normgene->exon
7893929					---	---	---	---	---	neg_control																													4		normgene->intron
7893930					---	---	---	---	---	neg_control																													4		normgene->intron
7893931					---	---	---	---	---	neg_control																													4		normgene->intron
7893932					---	---	---	---	---	neg_control																													4		normgene->intron
7893933					---	---	---	---	---	pos_control																													4		normgene->exon
7893934					---	---	---	---	---	neg_control																													4		normgene->intron
7893935					---	---	---	---	---	neg_control																													3		normgene->intron
7893936					---	---	---	---	---	neg_control																													4		normgene->intron
7893937					---	---	---	---	---	neg_control																													4		normgene->intron
7893938					---	---	---	---	---	neg_control																													4		normgene->intron
7893939					---	---	---	---	---	AFFX-BioB-5_at, bac_spike																													20		control->affx
7893940					---	---	---	---	---	neg_control																													4		normgene->intron
7893941					---	---	---	---	---	pos_control																													4		normgene->exon
7893942					---	---	---	---	---	neg_control																													4		normgene->intron
7893943					---	---	---	---	---	neg_control																													4		normgene->intron
7893944					---	---	---	---	---	neg_control																													3		normgene->intron
7893945					---	---	---	---	---	neg_control																													4		normgene->intron
7893946					---	---	---	---	---	pos_control																													4		normgene->exon
7893947					---	---	---	---	---	neg_control																													4		normgene->intron
7893948					---	---	---	---	---	pos_control																													4		normgene->exon
7893949					---	---	---	---	---	neg_control																													4		normgene->intron
7893950					---	---	---	---	---	neg_control																													4		normgene->intron
7893951					---	---	---	---	---	neg_control																													4		normgene->intron
7893952					---	---	---	---	---	pos_control																													4		normgene->exon
7893953					---	---	---	---	---	neg_control																													4		normgene->intron
7893954					---	---	---	---	---	neg_control																													4		normgene->intron
7893955					---	---	---	---	---	neg_control																													4		normgene->intron
7893956					---	---	---	---	---	pos_control																													4		normgene->exon
7893957					---	---	---	---	---	neg_control																													4		normgene->intron
7893958					---	---	---	---	---	neg_control																													4		normgene->intron
7893959					---	---	---	---	---	neg_control																													1		normgene->intron
7893960					---	---	---	---	---	neg_control																													4		normgene->intron
7893961					---	---	---	---	---	pos_control																													4		normgene->exon
7893962					---	---	---	---	---	neg_control																													4		normgene->intron
7893963					---	---	---	---	---	pos_control																													4		normgene->exon
7893964					---	---	---	---	---	neg_control																													4		normgene->intron
7893965					---	---	---	---	---	neg_control																													4		normgene->intron
7893966					---	---	---	---	---	pos_control																													4		normgene->exon
7893967					---	---	---	---	---	neg_control																													4		normgene->intron
7893968					---	---	---	---	---	pos_control																													4		normgene->exon
7893969					---	---	---	---	---	neg_control																													4		normgene->intron
7893970					---	---	---	---	---	neg_control																													4		normgene->intron
7893971					---	---	---	---	---	neg_control																													4		normgene->intron
7893972					---	---	---	---	---	neg_control																													4		normgene->intron
7893973					---	---	---	---	---	pos_control																													4		normgene->exon
7893974					---	---	---	---	---	neg_control																													4		normgene->intron
7893975					---	---	---	---	---	neg_control																													4		normgene->intron
7893976					---	---	---	---	---	neg_control																													4		normgene->intron
7893977					---	---	---	---	---	neg_control																													4		normgene->intron
7893978					---	---	---	---	---	neg_control																													4		normgene->intron
7893979					---	---	---	---	---	pos_control																													4		normgene->exon
7893980					---	---	---	---	---	neg_control																													4		normgene->intron
7893981					---	---	---	---	---	pos_control																													4		normgene->exon
7893982					---	---	---	---	---	neg_control																													3		normgene->intron
7893983					---	---	---	---	---	neg_control																													4		normgene->intron
7893984					---	---	---	---	---	neg_control																													4		normgene->intron
7893985					---	---	---	---	---	neg_control																													4		normgene->intron
7893986					---	---	---	---	---	neg_control																													4		normgene->intron
7893987					---	---	---	---	---	neg_control																													4		normgene->intron
7893988					---	---	---	---	---	---																													348		control->bgp->antigenomic
7893989					---	---	---	---	---	neg_control																													4		normgene->intron
7893990					---	---	---	---	---	neg_control																													4		normgene->intron
7893991					---	---	---	---	---	pos_control																													4		normgene->exon
7893992					---	---	---	---	---	neg_control																													4		normgene->intron
7893993					---	---	---	---	---	neg_control																													4		normgene->intron
7893994					---	---	---	---	---	neg_control																													4		normgene->intron
7893995					---	---	---	---	---	neg_control																													4		normgene->intron
7893996					---	---	---	---	---	neg_control																													2		normgene->intron
7893997					---	---	---	---	---	neg_control																													4		normgene->intron
7893998					---	---	---	---	---	neg_control																													4		normgene->intron
7893999					---	---	---	---	---	neg_control																													4		normgene->intron
7894000					---	---	---	---	---	neg_control																													4		normgene->intron
7894001					---	---	---	---	---	neg_control																													4		normgene->intron
7894002					---	---	---	---	---	neg_control																													4		normgene->intron
7894003					---	---	---	---	---	neg_control																													4		normgene->intron
7894004					---	---	---	---	---	neg_control																													4		normgene->intron
7894005					---	---	---	---	---	neg_control																													4		normgene->intron
7894006					---	---	---	---	---	neg_control																													4		normgene->intron
7894007					---	---	---	---	---	neg_control																													4		normgene->intron
7894008					---	---	---	---	---	neg_control																													2		normgene->intron
7894009					---	---	---	---	---	neg_control																													4		normgene->intron
7894010					---	---	---	---	---	pos_control																													4		normgene->exon
7894011					---	---	---	---	---	pos_control																													4		normgene->exon
7894012					---	---	---	---	---	pos_control																													4		normgene->exon
7894013					---	---	---	---	---	neg_control																													4		normgene->intron
7894014					---	---	---	---	---	neg_control																													4		normgene->intron
7894015					---	---	---	---	---	neg_control																													4		normgene->intron
7894016					---	---	---	---	---	neg_control																													2		normgene->intron
7894017					---	---	---	---	---	neg_control																													4		normgene->intron
7894018					---	---	---	---	---	neg_control																													4		normgene->intron
7894019					---	---	---	---	---	pos_control																													4		normgene->exon
7894020					---	---	---	---	---	neg_control																													4		normgene->intron
7894021					---	---	---	---	---	neg_control																													4		normgene->intron
7894022					---	---	---	---	---	neg_control																													4		normgene->intron
7894023					---	---	---	---	---	neg_control																													4		normgene->intron
7894024					---	---	---	---	---	neg_control																													4		normgene->intron
7894025					---	---	---	---	---	neg_control																													4		normgene->intron
7894026					---	---	---	---	---	neg_control																													4		normgene->intron
7894027					---	---	---	---	---	neg_control																													4		normgene->intron
7894028					---	---	---	---	---	neg_control																													4		normgene->intron
7894029					---	---	---	---	---	pos_control																													1		normgene->exon
7894030					---	---	---	---	---	neg_control																													4		normgene->intron
7894031					---	---	---	---	---	neg_control																													2		normgene->intron
7894032					---	---	---	---	---	neg_control																													4		normgene->intron
7894033					---	---	---	---	---	pos_control																													4		normgene->exon
7894034					---	---	---	---	---	neg_control																													4		normgene->intron
7894035					---	---	---	---	---	neg_control																													4		normgene->intron
7894036					---	---	---	---	---	neg_control																													4		normgene->intron
7894037					---	---	---	---	---	neg_control																													4		normgene->intron
7894038					---	---	---	---	---	neg_control																													3		normgene->intron
7894039					---	---	---	---	---	neg_control																													4		normgene->intron
7894040					---	---	---	---	---	neg_control																													4		normgene->intron
7894041					---	---	---	---	---	pos_control																													4		normgene->exon
7894042					---	---	---	---	---	pos_control																													4		normgene->exon
7894043					---	---	---	---	---	pos_control																													4		normgene->exon
7894044					---	---	---	---	---	pos_control																													4		normgene->exon
7894045					---	---	---	---	---	neg_control																													4		normgene->intron
7894046					---	---	---	---	---	neg_control																													4		normgene->intron
7894047					---	---	---	---	---	neg_control																													4		normgene->intron
7894048					---	---	---	---	---	neg_control																													4		normgene->intron
7894049					---	---	---	---	---	neg_control																													4		normgene->intron
7894050					---	---	---	---	---	neg_control																													4		normgene->intron
7894051					---	---	---	---	---	pos_control																													4		normgene->exon
7894052					---	---	---	---	---	neg_control																													4		normgene->intron
7894053					---	---	---	---	---	neg_control																													4		normgene->intron
7894054					---	---	---	---	---	neg_control																													3		normgene->intron
7894055					---	---	---	---	---	pos_control																													4		normgene->exon
7894056					---	---	---	---	---	pos_control																													4		normgene->exon
7894057					---	---	---	---	---	pos_control																													4		normgene->exon
7894058					---	---	---	---	---	pos_control																													4		normgene->exon
7894059					---	---	---	---	---	neg_control																													4		normgene->intron
7894060					---	---	---	---	---	neg_control																													4		normgene->intron
7894061					---	---	---	---	---	pos_control																													4		normgene->exon
7894062					---	---	---	---	---	neg_control																													4		normgene->intron
7894063					---	---	---	---	---	neg_control																													4		normgene->intron
7894064					---	---	---	---	---	neg_control																													3		normgene->intron
7894065					---	---	---	---	---	neg_control																													4		normgene->intron
7894066					---	---	---	---	---	neg_control																													4		normgene->intron
7894067					---	---	---	---	---	pos_control																													3		normgene->exon
7894068					---	---	---	---	---	pos_control																													1		normgene->exon
7894069					---	---	---	---	---	neg_control																													4		normgene->intron
7894070					---	---	---	---	---	pos_control																													4		normgene->exon
7894071					---	---	---	---	---	neg_control																													4		normgene->intron
7894072					---	---	---	---	---	pos_control																													4		normgene->exon
7894073					---	---	---	---	---	neg_control																													4		normgene->intron
7894074					---	---	---	---	---	pos_control																													4		normgene->exon
7894075					---	---	---	---	---	neg_control																													4		normgene->intron
7894076					---	---	---	---	---	pos_control																													4		normgene->exon
7894077					---	---	---	---	---	neg_control																													4		normgene->intron
7894078					---	---	---	---	---	pos_control																													4		normgene->exon
7894079					---	---	---	---	---	neg_control																													4		normgene->intron
7894080					---	---	---	---	---	neg_control																													4		normgene->intron
7894081					---	---	---	---	---	neg_control																													4		normgene->intron
7894082					---	---	---	---	---	neg_control																													3		normgene->intron
7894083					---	---	---	---	---	pos_control																													4		normgene->exon
7894084					---	---	---	---	---	neg_control																													4		normgene->intron
7894085					---	---	---	---	---	neg_control																													4		normgene->intron
7894086					---	---	---	---	---	pos_control																													4		normgene->exon
7894087					---	---	---	---	---	neg_control																													4		normgene->intron
7894088					---	---	---	---	---	pos_control																													4		normgene->exon
7894089					---	---	---	---	---	neg_control																													4		normgene->intron
7894090					---	---	---	---	---	neg_control																													2		normgene->intron
7894091					---	---	---	---	---	neg_control																													4		normgene->intron
7894092					---	---	---	---	---	neg_control																													4		normgene->intron
7894093					---	---	---	---	---	neg_control																													4		normgene->intron
7894094					---	---	---	---	---	neg_control																													4		normgene->intron
7894095					---	---	---	---	---	neg_control																													4		normgene->intron
7894096					---	---	---	---	---	neg_control																													4		normgene->intron
7894097					---	---	---	---	---	neg_control																													4		normgene->intron
7894098					---	---	---	---	---	pos_control																													4		normgene->exon
7894099					---	---	---	---	---	neg_control																													4		normgene->intron
7894100					---	---	---	---	---	pos_control																													3		normgene->exon
7894101					---	---	---	---	---	neg_control																													4		normgene->intron
7894102					---	---	---	---	---	neg_control																													4		normgene->intron
7894103					---	---	---	---	---	neg_control																													4		normgene->intron
7894104					---	---	---	---	---	pos_control																													4		normgene->exon
7894105					---	---	---	---	---	neg_control																													4		normgene->intron
7894106					---	---	---	---	---	neg_control																													4		normgene->intron
7894107					---	---	---	---	---	pos_control																													4		normgene->exon
7894108					---	---	---	---	---	neg_control																													4		normgene->intron
7894109					---	---	---	---	---	neg_control																													4		normgene->intron
7894110					---	---	---	---	---	pos_control																													4		normgene->exon
7894111					---	---	---	---	---	neg_control																													4		normgene->intron
7894112					---	---	---	---	---	neg_control																													4		normgene->intron
7894113					---	---	---	---	---	neg_control																													4		normgene->intron
7894114					---	---	---	---	---	pos_control																													4		normgene->exon
7894115					---	---	---	---	---	pos_control																													4		normgene->exon
7894116					---	---	---	---	---	neg_control																													4		normgene->intron
7894117					---	---	---	---	---	neg_control																													3		normgene->intron
7894118					---	---	---	---	---	pos_control																													4		normgene->exon
7894119					---	---	---	---	---	pos_control																													4		normgene->exon
7894120					---	---	---	---	---	neg_control																													4		normgene->intron
7894121					---	---	---	---	---	neg_control																													4		normgene->intron
7894122					---	---	---	---	---	neg_control																													4		normgene->intron
7894123					---	---	---	---	---	neg_control																													2		normgene->intron
7894124					---	---	---	---	---	neg_control																													4		normgene->intron
7894125					---	---	---	---	---	pos_control																													4		normgene->exon
7894126					---	---	---	---	---	neg_control																													4		normgene->intron
7894128					---	---	---	---	---	neg_control																													4		normgene->intron
7894129					---	---	---	---	---	neg_control																													4		normgene->intron
7894130					---	---	---	---	---	neg_control																													4		normgene->intron
7894131					---	---	---	---	---	neg_control																													4		normgene->intron
7894132					---	---	---	---	---	---																													132		control->bgp->antigenomic
7894133					---	---	---	---	---	neg_control																													4		normgene->intron
7894134					---	---	---	---	---	pos_control																													4		normgene->exon
7894135					---	---	---	---	---	neg_control																													4		normgene->intron
7894136					---	---	---	---	---	pos_control																													4		normgene->exon
7894137					---	---	---	---	---	neg_control																													4		normgene->intron
7894138					---	---	---	---	---	pos_control																													4		normgene->exon
7894139					---	---	---	---	---	neg_control																													4		normgene->intron
7894140					---	---	---	---	---	neg_control																													4		normgene->intron
7894141					---	---	---	---	---	neg_control																													4		normgene->intron
7894142					---	---	---	---	---	neg_control																													4		normgene->intron
7894143					---	---	---	---	---	neg_control																													4		normgene->intron
7894144					---	---	---	---	---	neg_control																													4		normgene->intron
7894145					---	---	---	---	---	neg_control																													4		normgene->intron
7894146					---	---	---	---	---	pos_control																													4		normgene->exon
7894147					---	---	---	---	---	neg_control																													4		normgene->intron
7894148					---	---	---	---	---	neg_control																													4		normgene->intron
7894149					---	---	---	---	---	neg_control																													4		normgene->intron
7894150					---	---	---	---	---	neg_control																													1		normgene->intron
7894151					---	---	---	---	---	neg_control																													4		normgene->intron
7894152					---	---	---	---	---	neg_control																													4		normgene->intron
7894153					---	---	---	---	---	neg_control																													4		normgene->intron
7894154					---	---	---	---	---	neg_control																													4		normgene->intron
7894155					---	---	---	---	---	neg_control																													2		normgene->intron
7894156					---	---	---	---	---	neg_control																													4		normgene->intron
7894157					---	---	---	---	---	pos_control																													4		normgene->exon
7894158					---	---	---	---	---	pos_control																													4		normgene->exon
7894159					---	---	---	---	---	neg_control																													4		normgene->intron
7894160					---	---	---	---	---	pos_control																													1		normgene->exon
7894161					---	---	---	---	---	pos_control																													4		normgene->exon
7894162					---	---	---	---	---	neg_control																													4		normgene->intron
7894163					---	---	---	---	---	neg_control																													4		normgene->intron
7894165					---	---	---	---	---	pos_control																													4		normgene->exon
7894166					---	---	---	---	---	neg_control																													4		normgene->intron
7894167					---	---	---	---	---	neg_control																													4		normgene->intron
7894168					---	---	---	---	---	neg_control																													4		normgene->intron
7894169					---	---	---	---	---	neg_control																													3		normgene->intron
7894170					---	---	---	---	---	neg_control																													4		normgene->intron
7894171					---	---	---	---	---	pos_control																													4		normgene->exon
7894172					---	---	---	---	---	neg_control																													4		normgene->intron
7894173					---	---	---	---	---	neg_control																													4		normgene->intron
7894174					---	---	---	---	---	neg_control																													4		normgene->intron
7894175					---	---	---	---	---	neg_control																													4		normgene->intron
7894176					---	---	---	---	---	neg_control																													4		normgene->intron
7894177					---	---	---	---	---	neg_control																													4		normgene->intron
7894178					---	---	---	---	---	neg_control																													4		normgene->intron
7894179					---	---	---	---	---	neg_control																													4		normgene->intron
7894180					---	---	---	---	---	neg_control																													4		normgene->intron
7894181					---	---	---	---	---	neg_control																													4		normgene->intron
7894182					---	---	---	---	---	neg_control																													4		normgene->intron
7894183					---	---	---	---	---	neg_control																													4		normgene->intron
7894184					---	---	---	---	---	neg_control																													4		normgene->intron
7894185					---	---	---	---	---	pos_control																													4		normgene->exon
7894186					---	---	---	---	---	pos_control																													3		normgene->exon
7894187					---	---	---	---	---	neg_control																													4		normgene->intron
7894188					---	---	---	---	---	pos_control																													4		normgene->exon
7894189					---	---	---	---	---	neg_control																													4		normgene->intron
7894190					---	---	---	---	---	neg_control																													4		normgene->intron
7894191					---	---	---	---	---	neg_control																													4		normgene->intron
7894192					---	---	---	---	---	neg_control																													4		normgene->intron
7894193					---	---	---	---	---	neg_control																													4		normgene->intron
7894194					---	---	---	---	---	neg_control																													4		normgene->intron
7894195					---	---	---	---	---	pos_control																													4		normgene->exon
7894196					---	---	---	---	---	pos_control																													4		normgene->exon
7894197					---	---	---	---	---	neg_control																													1		normgene->intron
7894198					---	---	---	---	---	---																													160		control->bgp->antigenomic
7894199					---	---	---	---	---	pos_control																													3		normgene->exon
7894200					---	---	---	---	---	neg_control																													4		normgene->intron
7894201					---	---	---	---	---	neg_control																													4		normgene->intron
7894202					---	---	---	---	---	neg_control																													4		normgene->intron
7894203					---	---	---	---	---	neg_control																													4		normgene->intron
7894204					---	---	---	---	---	pos_control																													4		normgene->exon
7894205					---	---	---	---	---	pos_control																													4		normgene->exon
7894206					---	---	---	---	---	neg_control																													4		normgene->intron
7894207					---	---	---	---	---	neg_control																													4		normgene->intron
7894208					---	---	---	---	---	neg_control																													2		normgene->intron
7894209					---	---	---	---	---	pos_control																													4		normgene->exon
7894210					---	---	---	---	---	neg_control																													4		normgene->intron
7894211					---	---	---	---	---	pos_control																													4		normgene->exon
7894212					---	---	---	---	---	pos_control																													4		normgene->exon
7894213					---	---	---	---	---	neg_control																													4		normgene->intron
7894214					---	---	---	---	---	pos_control																													4		normgene->exon
7894215					---	---	---	---	---	neg_control																													4		normgene->intron
7894216					---	---	---	---	---	neg_control																													4		normgene->intron
7894217					---	---	---	---	---	neg_control																													4		normgene->intron
7894218					---	---	---	---	---	neg_control																													4		normgene->intron
7894219					---	---	---	---	---	neg_control																													4		normgene->intron
7894220					---	---	---	---	---	neg_control																													4		normgene->intron
7894221					---	---	---	---	---	neg_control																													4		normgene->intron
7894222					---	---	---	---	---	neg_control																													4		normgene->intron
7894223					---	---	---	---	---	neg_control																													4		normgene->intron
7894224					---	---	---	---	---	neg_control																													4		normgene->intron
7894225					---	---	---	---	---	neg_control																													4		normgene->intron
7894226					---	---	---	---	---	pos_control																													4		normgene->exon
7894227					---	---	---	---	---	neg_control																													4		normgene->intron
7894228					---	---	---	---	---	neg_control																													4		normgene->intron
7894229					---	---	---	---	---	neg_control																													4		normgene->intron
7894230					---	---	---	---	---	neg_control																													4		normgene->intron
7894231					---	---	---	---	---	neg_control																													3		normgene->intron
7894232					---	---	---	---	---	neg_control																													4		normgene->intron
7894233					---	---	---	---	---	neg_control																													4		normgene->intron
7894234					---	---	---	---	---	neg_control																													4		normgene->intron
7894235					---	---	---	---	---	neg_control																													4		normgene->intron
7894236					---	---	---	---	---	neg_control																													4		normgene->intron
7894237					---	---	---	---	---	neg_control																													4		normgene->intron
7894238					---	---	---	---	---	pos_control																													1		normgene->exon
7894239					---	---	---	---	---	pos_control																													4		normgene->exon
7894240					---	---	---	---	---	neg_control																													4		normgene->intron
7894241					---	---	---	---	---	neg_control																													4		normgene->intron
7894242					---	---	---	---	---	neg_control																													4		normgene->intron
7894243					---	---	---	---	---	neg_control																													3		normgene->intron
7894244					---	---	---	---	---	neg_control																													4		normgene->intron
7894245					---	---	---	---	---	neg_control																													4		normgene->intron
7894246					---	---	---	---	---	neg_control																													4		normgene->intron
7894247					---	---	---	---	---	neg_control																													4		normgene->intron
7894248					---	---	---	---	---	neg_control																													4		normgene->intron
7894249					---	---	---	---	---	neg_control																													4		normgene->intron
7894250					---	---	---	---	---	neg_control																													4		normgene->intron
7894251					---	---	---	---	---	pos_control																													4		normgene->exon
7894252					---	---	---	---	---	pos_control																													4		normgene->exon
7894253					---	---	---	---	---	neg_control																													4		normgene->intron
7894254					---	---	---	---	---	neg_control																													4		normgene->intron
7894255					---	---	---	---	---	neg_control																													4		normgene->intron
7894256					---	---	---	---	---	neg_control																													4		normgene->intron
7894257					---	---	---	---	---	neg_control																													4		normgene->intron
7894258					---	---	---	---	---	pos_control																													4		normgene->exon
7894259					---	---	---	---	---	neg_control																													4		normgene->intron
7894260					---	---	---	---	---	neg_control																													4		normgene->intron
7894262					---	---	---	---	---	pos_control																													4		normgene->exon
7894263					---	---	---	---	---	pos_control																													4		normgene->exon
7894264					---	---	---	---	---	pos_control																													4		normgene->exon
7894265					---	---	---	---	---	neg_control																													4		normgene->intron
7894266					---	---	---	---	---	neg_control																													1		normgene->intron
7894267					---	---	---	---	---	pos_control																													4		normgene->exon
7894268					---	---	---	---	---	neg_control																													4		normgene->intron
7894269					---	---	---	---	---	pos_control																													4		normgene->exon
7894270					---	---	---	---	---	neg_control																													4		normgene->intron
7894271					---	---	---	---	---	neg_control																													1		normgene->intron
7894272					---	---	---	---	---	pos_control																													4		normgene->exon
7894273					---	---	---	---	---	neg_control																													3		normgene->intron
7894274					---	---	---	---	---	neg_control																													4		normgene->intron
7894275					---	---	---	---	---	neg_control																													4		normgene->intron
7894276					---	---	---	---	---	neg_control																													4		normgene->intron
7894277					---	---	---	---	---	pos_control																													4		normgene->exon
7894278					---	---	---	---	---	neg_control																													4		normgene->intron
7894279					---	---	---	---	---	neg_control																													4		normgene->intron
7894280					---	---	---	---	---	neg_control																													2		normgene->intron
7894281					---	---	---	---	---	neg_control																													4		normgene->intron
7894282					---	---	---	---	---	pos_control																													4		normgene->exon
7894283					---	---	---	---	---	neg_control																													4		normgene->intron
7894284					---	---	---	---	---	pos_control																													4		normgene->exon
7894285					---	---	---	---	---	neg_control																													4		normgene->intron
7894286					---	---	---	---	---	neg_control																													4		normgene->intron
7894287					---	---	---	---	---	neg_control																													4		normgene->intron
7894288					---	---	---	---	---	neg_control																													4		normgene->intron
7894289					---	---	---	---	---	pos_control																													4		normgene->exon
7894290					---	---	---	---	---	pos_control																													4		normgene->exon
7894291					---	---	---	---	---	pos_control																													4		normgene->exon
7894292					---	---	---	---	---	neg_control																													1		normgene->intron
7894293					---	---	---	---	---	neg_control																													4		normgene->intron
7894294					---	---	---	---	---	pos_control																													4		normgene->exon
7894295					---	---	---	---	---	pos_control																													4		normgene->exon
7894296					---	---	---	---	---	neg_control																													1		normgene->intron
7894297					---	---	---	---	---	neg_control																													3		normgene->intron
7894298					---	---	---	---	---	neg_control																													4		normgene->intron
7894299					---	---	---	---	---	neg_control																													4		normgene->intron
7894300					---	---	---	---	---	neg_control																													4		normgene->intron
7894301					---	---	---	---	---	neg_control																													4		normgene->intron
7894302					---	---	---	---	---	neg_control																													4		normgene->intron
7894303					---	---	---	---	---	neg_control																													4		normgene->intron
7894304					---	---	---	---	---	pos_control																													4		normgene->exon
7894305					---	---	---	---	---	neg_control																													4		normgene->intron
7894306					---	---	---	---	---	pos_control																													4		normgene->exon
7894307					---	---	---	---	---	pos_control																													4		normgene->exon
7894308					---	---	---	---	---	neg_control																													4		normgene->intron
7894309					---	---	---	---	---	neg_control																													4		normgene->intron
7894310					---	---	---	---	---	neg_control																													1		normgene->intron
7894311					---	---	---	---	---	neg_control																													4		normgene->intron
7894312					---	---	---	---	---	neg_control																													4		normgene->intron
7894313					---	---	---	---	---	neg_control																													4		normgene->intron
7894314					---	---	---	---	---	neg_control																													4		normgene->intron
7894315					---	---	---	---	---	pos_control																													4		normgene->exon
7894316					---	---	---	---	---	pos_control																													4		normgene->exon
7894317					---	---	---	---	---	neg_control																													2		normgene->intron
7894318					---	---	---	---	---	neg_control																													4		normgene->intron
7894319					---	---	---	---	---	neg_control																													4		normgene->intron
7894320					---	---	---	---	---	neg_control																													4		normgene->intron
7894321					---	---	---	---	---	pos_control																													3		normgene->exon
7894322					---	---	---	---	---	neg_control																													4		normgene->intron
7894323					---	---	---	---	---	neg_control																													4		normgene->intron
7894324					---	---	---	---	---	pos_control																													4		normgene->exon
7894325					---	---	---	---	---	neg_control																													4		normgene->intron
7894326					---	---	---	---	---	neg_control																													4		normgene->intron
7894327					---	---	---	---	---	neg_control																													4		normgene->intron
7894328					---	---	---	---	---	neg_control																													4		normgene->intron
7894329					---	---	---	---	---	pos_control																													4		normgene->exon
7894330					---	---	---	---	---	neg_control																													2		normgene->intron
7894331					---	---	---	---	---	pos_control																													4		normgene->exon
7894332					---	---	---	---	---	neg_control																													1		normgene->intron
7894333					---	---	---	---	---	neg_control																													4		normgene->intron
7894334					---	---	---	---	---	neg_control																													4		normgene->intron
7894335					---	---	---	---	---	neg_control																													4		normgene->intron
7894336					---	---	---	---	---	pos_control																													4		normgene->exon
7894337					---	---	---	---	---	neg_control																													4		normgene->intron
7894338					---	---	---	---	---	neg_control																													3		normgene->intron
7894339					---	---	---	---	---	neg_control																													4		normgene->intron
7894340					---	---	---	---	---	neg_control																													3		normgene->intron
7894341					---	---	---	---	---	pos_control																													4		normgene->exon
7894342					---	---	---	---	---	neg_control																													4		normgene->intron
7894343					---	---	---	---	---	neg_control																													4		normgene->intron
7894344					---	---	---	---	---	neg_control																													4		normgene->intron
7894345					---	---	---	---	---	neg_control																													1		normgene->intron
7894346					---	---	---	---	---	neg_control																													4		normgene->intron
7894347					---	---	---	---	---	neg_control																													4		normgene->intron
7894349					---	---	---	---	---	neg_control																													4		normgene->intron
7894350					---	---	---	---	---	pos_control																													4		normgene->exon
7894351					---	---	---	---	---	neg_control																													4		normgene->intron
7894352					---	---	---	---	---	neg_control																													4		normgene->intron
7894353					---	---	---	---	---	neg_control																													4		normgene->intron
7894354					---	---	---	---	---	neg_control																													4		normgene->intron
7894355					---	---	---	---	---	pos_control																													4		normgene->exon
7894356					---	---	---	---	---	neg_control																													4		normgene->intron
7894357					---	---	---	---	---	neg_control																													4		normgene->intron
7894358					---	---	---	---	---	neg_control																													4		normgene->intron
7894359					---	---	---	---	---	neg_control																													3		normgene->intron
7894360					---	---	---	---	---	neg_control																													4		normgene->intron
7894361					---	---	---	---	---	neg_control																													4		normgene->intron
7894362					---	---	---	---	---	neg_control																													2		normgene->intron
7894363					---	---	---	---	---	pos_control																													1		normgene->exon
7894364					---	---	---	---	---	neg_control																													4		normgene->intron
7894365					---	---	---	---	---	neg_control																													4		normgene->intron
7894366					---	---	---	---	---	pos_control																													4		normgene->exon
7894367					---	---	---	---	---	neg_control																													4		normgene->intron
7894368					---	---	---	---	---	neg_control																													4		normgene->intron
7894369					---	---	---	---	---	neg_control																													4		normgene->intron
7894370					---	---	---	---	---	neg_control																													4		normgene->intron
7894371					---	---	---	---	---	neg_control																													4		normgene->intron
7894372					---	---	---	---	---	pos_control																													4		normgene->exon
7894373					---	---	---	---	---	pos_control																													4		normgene->exon
7894374					---	---	---	---	---	pos_control																													4		normgene->exon
7894375					---	---	---	---	---	pos_control																													4		normgene->exon
7894376					---	---	---	---	---	pos_control																													4		normgene->exon
7894377					---	---	---	---	---	neg_control																													3		normgene->intron
7894378					---	---	---	---	---	neg_control																													4		normgene->intron
7894379					---	---	---	---	---	pos_control																													4		normgene->exon
7894380					---	---	---	---	---	pos_control																													4		normgene->exon
7894381					---	---	---	---	---	neg_control																													4		normgene->intron
7894382					---	---	---	---	---	neg_control																													4		normgene->intron
7894383					---	---	---	---	---	neg_control																													4		normgene->intron
7894384					---	---	---	---	---	neg_control																													2		normgene->intron
7894385					---	---	---	---	---	neg_control																													4		normgene->intron
7894386					---	---	---	---	---	pos_control																													4		normgene->exon
7894387					---	---	---	---	---	neg_control																													4		normgene->intron
7894388					---	---	---	---	---	neg_control																													4		normgene->intron
7894389					---	---	---	---	---	pos_control																													4		normgene->exon
7894390					---	---	---	---	---	neg_control																													4		normgene->intron
7894391					---	---	---	---	---	neg_control																													4		normgene->intron
7894392					---	---	---	---	---	neg_control																													4		normgene->intron
7894393					---	---	---	---	---	neg_control																													4		normgene->intron
7894394					---	---	---	---	---	neg_control																													4		normgene->intron
7894395					---	---	---	---	---	pos_control																													2		normgene->exon
7894396					---	---	---	---	---	neg_control																													4		normgene->intron
7894397					---	---	---	---	---	neg_control																													4		normgene->intron
7894398					---	---	---	---	---	neg_control																													4		normgene->intron
7894399					---	---	---	---	---	neg_control																													4		normgene->intron
7894400					---	---	---	---	---	neg_control																													4		normgene->intron
7894401					---	---	---	---	---	neg_control																													4		normgene->intron
7894402					---	---	---	---	---	pos_control																													4		normgene->exon
7894403					---	---	---	---	---	neg_control																													4		normgene->intron
7894404					---	---	---	---	---	pos_control																													4		normgene->exon
7894405					---	---	---	---	---	neg_control																													4		normgene->intron
7894406					---	---	---	---	---	neg_control																													4		normgene->intron
7894407					---	---	---	---	---	neg_control																													4		normgene->intron
7894408					---	---	---	---	---	neg_control																													4		normgene->intron
7894409					---	---	---	---	---	neg_control																													3		normgene->intron
7894410					---	---	---	---	---	neg_control																													4		normgene->intron
7894411					---	---	---	---	---	pos_control																													4		normgene->exon
7894412					---	---	---	---	---	pos_control																													4		normgene->exon
7894413					---	---	---	---	---	pos_control																													4		normgene->exon
7894414					---	---	---	---	---	neg_control																													4		normgene->intron
7894415					---	---	---	---	---	neg_control																													4		normgene->intron
7894416					---	---	---	---	---	pos_control																													4		normgene->exon
7894417					---	---	---	---	---	neg_control																													4		normgene->intron
7894418					---	---	---	---	---	neg_control																													4		normgene->intron
7894419					---	---	---	---	---	pos_control																													1		normgene->exon
7894420					---	---	---	---	---	neg_control																													4		normgene->intron
7894421					---	---	---	---	---	pos_control																													4		normgene->exon
7894422					---	---	---	---	---	neg_control																													4		normgene->intron
7894423					---	---	---	---	---	neg_control																													4		normgene->intron
7894425					---	---	---	---	---	neg_control																													4		normgene->intron
7894426					---	---	---	---	---	neg_control																													4		normgene->intron
7894427					---	---	---	---	---	pos_control																													4		normgene->exon
7894428					---	---	---	---	---	pos_control																													4		normgene->exon
7894429					---	---	---	---	---	pos_control																													4		normgene->exon
7894430					---	---	---	---	---	neg_control																													4		normgene->intron
7894431					---	---	---	---	---	pos_control																													4		normgene->exon
7894432					---	---	---	---	---	neg_control																													4		normgene->intron
7894433					---	---	---	---	---	pos_control																													4		normgene->exon
7894434					---	---	---	---	---	neg_control																													4		normgene->intron
7894435					---	---	---	---	---	pos_control																													4		normgene->exon
7894436					---	---	---	---	---	pos_control																													4		normgene->exon
7894437					---	---	---	---	---	pos_control																													2		normgene->exon
7894438					---	---	---	---	---	pos_control																													4		normgene->exon
7894439					---	---	---	---	---	pos_control																													4		normgene->exon
7894440					---	---	---	---	---	neg_control																													4		normgene->intron
7894441					---	---	---	---	---	neg_control																													2		normgene->intron
7894442					---	---	---	---	---	neg_control																													4		normgene->intron
7894443					---	---	---	---	---	neg_control																													4		normgene->intron
7894444					---	---	---	---	---	neg_control																													4		normgene->intron
7894445					---	---	---	---	---	neg_control																													4		normgene->intron
7894446					---	---	---	---	---	neg_control																													4		normgene->intron
7894447					---	---	---	---	---	neg_control																													4		normgene->intron
7894448					---	---	---	---	---	neg_control																													4		normgene->intron
7894449					---	---	---	---	---	pos_control																													4		normgene->exon
7894450					---	---	---	---	---	neg_control																													3		normgene->intron
7894451					---	---	---	---	---	pos_control																													1		normgene->exon
7894452					---	---	---	---	---	neg_control																													4		normgene->intron
7894453					---	---	---	---	---	neg_control																													4		normgene->intron
7894454					---	---	---	---	---	neg_control																													4		normgene->intron
7894455					---	---	---	---	---	neg_control																													4		normgene->intron
7894456					---	---	---	---	---	neg_control																													4		normgene->intron
7894457					---	---	---	---	---	neg_control																													4		normgene->intron
7894458					---	---	---	---	---	neg_control																													4		normgene->intron
7894459					---	---	---	---	---	pos_control																													4		normgene->exon
7894460					---	---	---	---	---	neg_control																													4		normgene->intron
7894461					---	---	---	---	---	neg_control																													4		normgene->intron
7894462					---	---	---	---	---	neg_control																													4		normgene->intron
7894463					---	---	---	---	---	neg_control																													4		normgene->intron
7894464					---	---	---	---	---	neg_control																													4		normgene->intron
7894465					---	---	---	---	---	neg_control																													4		normgene->intron
7894466					---	---	---	---	---	neg_control																													4		normgene->intron
7894467					---	---	---	---	---	neg_control																													4		normgene->intron
7894468					---	---	---	---	---	neg_control																													4		normgene->intron
7894469					---	---	---	---	---	pos_control																													4		normgene->exon
7894470					---	---	---	---	---	pos_control																													4		normgene->exon
7894471					---	---	---	---	---	pos_control																													4		normgene->exon
7894472					---	---	---	---	---	neg_control																													4		normgene->intron
7894473					---	---	---	---	---	neg_control																													4		normgene->intron
7894474					---	---	---	---	---	pos_control																													4		normgene->exon
7894475					---	---	---	---	---	neg_control																													4		normgene->intron
7894476					---	---	---	---	---	neg_control																													4		normgene->intron
7894477					---	---	---	---	---	neg_control																													4		normgene->intron
7894478					---	---	---	---	---	pos_control																													4		normgene->exon
7894479					---	---	---	---	---	pos_control																													4		normgene->exon
7894480					---	---	---	---	---	---																													285		control->bgp->antigenomic
7894481					---	---	---	---	---	neg_control																													4		normgene->intron
7894482					---	---	---	---	---	neg_control																													4		normgene->intron
7894483					---	---	---	---	---	neg_control																													4		normgene->intron
7894484					---	---	---	---	---	neg_control																													4		normgene->intron
7894485					---	---	---	---	---	pos_control																													4		normgene->exon
7894486					---	---	---	---	---	neg_control																													4		normgene->intron
7894487					---	---	---	---	---	neg_control																													4		normgene->intron
7894488					---	---	---	---	---	neg_control																													4		normgene->intron
7894489					---	---	---	---	---	pos_control																													4		normgene->exon
7894490					---	---	---	---	---	neg_control																													4		normgene->intron
7894491					---	---	---	---	---	neg_control																													4		normgene->intron
7894492					---	---	---	---	---	pos_control																													4		normgene->exon
7894493					---	---	---	---	---	neg_control																													4		normgene->intron
7894494					---	---	---	---	---	neg_control																													4		normgene->intron
7894495					---	---	---	---	---	neg_control																													4		normgene->intron
7894496					---	---	---	---	---	pos_control																													4		normgene->exon
7894497					---	---	---	---	---	neg_control																													4		normgene->intron
7894498					---	---	---	---	---	pos_control																													4		normgene->exon
7894499					---	---	---	---	---	neg_control																													4		normgene->intron
7894500					---	---	---	---	---	neg_control																													4		normgene->intron
7894501					---	---	---	---	---	pos_control																													4		normgene->exon
7894502					---	---	---	---	---	neg_control																													4		normgene->intron
7894503					---	---	---	---	---	neg_control																													4		normgene->intron
7894504					---	---	---	---	---	pos_control																													4		normgene->exon
7894505					---	---	---	---	---	neg_control																													4		normgene->intron
7894506					---	---	---	---	---	neg_control																													4		normgene->intron
7894507					---	---	---	---	---	neg_control																													4		normgene->intron
7894508					---	---	---	---	---	neg_control																													4		normgene->intron
7894509					---	---	---	---	---	neg_control																													4		normgene->intron
7894510					---	---	---	---	---	neg_control																													2		normgene->intron
7894511					---	---	---	---	---	neg_control																													4		normgene->intron
7894512					---	---	---	---	---	pos_control																													4		normgene->exon
[truncated: 30,739 more rows]
