# Supplementary material for: Loss of Gene Information: Discrepancies between RNA Sequencing, cDNA Microarray, and qRT-PCR
Source: Int J Mol Sci. 2021 Aug 28;22(17):9349. doi: 10.3390/ijms22179349 (PMC8430810; doi:10.3390/ijms22179349)
Supplement: Supplementary file 1 [file ijms-22-09349-s001.zip › Supplementary_Table_S5.xlsx]

## Sheet: Raw_Norm_CountTable_Melanoma
Gene	GeneName	WM3211_rep1	WM3211_rep2	WM793_rep1	WM793_rep2	WM1366_rep1	WM1366_rep2
ENSG00000223972.5	DDX11L1	1.34977	0	0.979253	1.83209	3.17355	3.14651
ENSG00000227232.5	WASH7P	8.0986	3.43319	0	2.74814	0	3.14651
ENSG00000278267.1	MIR6859-1	0	0	0	0.916047	0	1.57325
ENSG00000243485.3	RP11-34P13.3	0	0	0	0	0	0
ENSG00000274890.1	MIR1302-2	0	0	0	0	0	0
ENSG00000237613.2	FAM138A	0	0	0	0	0	0
ENSG00000268020.3	OR4G4P	0	0	0	0	0	0
ENSG00000240361.1	OR4G11P	0	0	0	0	0	0
ENSG00000186092.4	OR4F5	0	0	0	0	0	0
ENSG00000238009.6	RP11-34P13.7	0	0	0	0	0	0
ENSG00000239945.1	RP11-34P13.8	0	0	0	0	0	0
ENSG00000233750.3	CICP27	0	0	0	0	0	0
ENSG00000268903.1	RP11-34P13.15	0	0	0	0	0	0
ENSG00000269981.1	RP11-34P13.16	0	0	0	0	0	0
ENSG00000239906.1	RP11-34P13.14	0	0	0	0	0	0
ENSG00000241860.6	RP11-34P13.13	1.34977	1.1444	1.95851	1.83209	3.17355	4.71976
ENSG00000222623.1	RNU6-1100P	0	0	0	0	0	0
ENSG00000241599.1	RP11-34P13.9	0	0	0	0	0	0
ENSG00000279928.1	FO538757.3	0	0	0	0.916047	0	0
ENSG00000279457.3	FO538757.2	17.547	14.8772	8.81327	9.16047	7.93388	11.7994
ENSG00000273874.1	MIR6859-2	0	0	0	0	0	0
ENSG00000275135.1	FO538757.1	0	0	0	0	0	0
ENSG00000228463.9	AP006222.2	6.74884	1.1444	4.89626	1.83209	7.93388	3.14651
ENSG00000241670.3	RPL23AP21	0	0	0	0	0	0
ENSG00000236679.2	RPL23AP24	1.34977	0	0	0	0	0
ENSG00000236743.1	RP5-857K21.15	0	0	0	0	0	0
ENSG00000236601.2	RP4-669L17.2	0	0	0	0	0	0
ENSG00000237094.11	RP4-669L17.10	6.74884	8.01079	0.979253	2.74814	9.52065	14.9459
ENSG00000269732.1	WBP1LP7	0	0	0	0	0	0
ENSG00000278566.1	OR4F29	0	0	0	0	0	0
ENSG00000224813.3	SEPT14P13	0	0	0	0	0	0
ENSG00000233653.3	CICP7	0	0	0	0	0	0
ENSG00000250575.1	RP4-669L17.8	0	0	0	0	0	0
ENSG00000278757.1	U6	0	0	0	0	0	0
ENSG00000230021.8	RP5-857K21.4	0	0	0	0.916047	0	0.786627
ENSG00000235146.2	RP5-857K21.2	0	0	0	0	0	0
ENSG00000225972.1	MTND1P23	1.34977	2.2888	0.979253	2.74814	6.3471	8.6529
ENSG00000225630.1	MTND2P28	14.8474	12.5884	11.751	11.9086	17.4545	14.1593
ENSG00000276171.1	AC114498.1	4.0493	1.1444	2.93776	7.32838	6.3471	3.93314
ENSG00000237973.1	MTCO1P12	91.7842	106.429	33.2946	214.355	125.355	169.125
ENSG00000278791.1	MIR6723	0	0	0	0	0	0
ENSG00000229344.1	MTCO2P12	179.519	223.158	19.5851	96.1849	291.967	313.864
ENSG00000240409.1	MTATP8P1	0	0	0	3.66419	1.58678	1.57325
ENSG00000248527.1	MTATP6P1	66.1386	80.1079	26.4398	143.819	133.289	105.408
ENSG00000198744.5	MTCO3P12	95.8335	42.3427	19.5851	98.9331	88.8594	76.3028
ENSG00000268663.1	WBP1LP6	0	0	0	0	0	0
ENSG00000273547.1	OR4F16	0	0	0	0	0	0
ENSG00000229376.3	CICP3	0	0	0.979253	0	0	0.786627
ENSG00000228327.3	RP11-206L10.2	12.1479	2.2888	4.89626	9.16047	11.1074	6.29302
ENSG00000223181.1	RNU6-1199P	2.69953	0	0	0	0	0
ENSG00000229905.1	RP11-206L10.4	0	0	0	0	0	0
ENSG00000237491.8	RP11-206L10.9	10.7981	2.2888	6.85477	9.16047	14.281	10.2262
ENSG00000230092.7	RP11-206L10.8	0	2.2888	3.91701	0.916047	4.76033	2.35988
ENSG00000177757.2	FAM87B	4.0493	2.2888	0	1.83209	6.3471	0.786627
ENSG00000228794.8	LINC01128	62.0893	49.2091	42.1079	56.7949	55.5371	83.3825
ENSG00000225880.5	LINC00115	4.0493	5.72199	3.91701	9.16047	11.1074	6.29302
ENSG00000230368.2	FAM41C	1.34977	0	0	0	0	0
ENSG00000234711.1	TUBB8P11	0	0	0	0	0	0
ENSG00000283040.1	FAM166AP3	0	0	0	0	0	0
ENSG00000272438.1	RP11-54O7.16	0	0	0	0	0	0
ENSG00000230699.2	RP11-54O7.1	0	0	0	0	0	0
ENSG00000241180.1	RP11-54O7.2	0	0	0	0	0	0
ENSG00000223764.2	RP11-54O7.3	0	0	0	0	0	0
ENSG00000187634.10	SAMD11	1.34977	0	0	0.916047	0	0.786627
ENSG00000188976.10	NOC2L	1284.98	1218.78	760.879	677.875	1340.82	1477.29
ENSG00000187961.13	KLHL17	51.2912	24.0324	20.5643	51.2986	69.8181	44.0511
ENSG00000277294.1	AL645608.1	0	0	0	0	0	0
ENSG00000187583.10	PLEKHN1	5.39907	2.2888	19.5851	40.3061	6.3471	3.93314
ENSG00000187642.9	PERM1	2.69953	0	2.93776	2.74814	0	0.786627
ENSG00000272512.1	RP11-54O7.17	1.34977	0	0.979253	2.74814	0	0
ENSG00000188290.10	HES4	9.44837	6.86639	33.2946	27.4814	0	1.57325
ENSG00000187608.8	ISG15	125.528	143.05	89.112	54.9628	111.074	217.896
ENSG00000231702.2	RP11-54O7.10	0	0	0	0	0	0
ENSG00000224969.1	RP11-54O7.11	0	0	0	0	0	0
ENSG00000188157.13	AGRN	315.846	258.634	566.008	665.05	390.347	361.849
ENSG00000242590.1	RP11-54O7.14	0	0	0	0	0	0
ENSG00000217801.9	RP11-465B22.3	103.932	151.061	78.3402	91.6047	103.14	102.262
ENSG00000273443.1	RP11-54O7.18	0	2.2888	1.95851	1.83209	0	1.57325
ENSG00000237330.2	RNF223	0	0	0	0	0	0
ENSG00000131591.17	C1orf159	47.2419	29.7544	47.9834	64.1233	38.0826	51.9174
ENSG00000223823.1	LINC01342	0	1.1444	0	0	0	0
ENSG00000207730.2	MIR200B	0	0	0	0	0	0
ENSG00000207607.2	MIR200A	0	0	0	0	0	0
ENSG00000198976.1	MIR429	0	0	0	0	0	0
ENSG00000272141.1	RP11-465B22.8	0	0	0	0	0	0
ENSG00000205231.1	TTLL10-AS1	0	0	0	0	0	0
ENSG00000162571.13	TTLL10	0	0	0	0	0	0
ENSG00000186891.13	TNFRSF18	0	0	0	0	0	0
ENSG00000186827.10	TNFRSF4	0	0	0	0	0	0
ENSG00000078808.16	SDF4	388.733	456.615	1069.34	673.295	426.842	442.871
ENSG00000176022.4	B3GALT6	159.273	149.916	274.191	244.585	166.611	180.138
ENSG00000184163.3	FAM132A	0	0	0	0	0	1.57325
ENSG00000260179.1	RP5-902P8.12	0	1.1444	0.979253	0.916047	3.17355	0
ENSG00000160087.20	UBE2J2	444.073	418.85	286.921	394.816	523.636	471.976
ENSG00000230415.1	RP5-902P8.10	2.69953	0	0	0.916047	0	0.786627
ENSG00000162572.19	SCNN1D	10.7981	4.57759	0.979253	17.4049	15.8678	1.57325
ENSG00000131584.18	ACAP3	68.8381	42.3427	70.5062	111.758	72.9917	73.1563
ENSG00000278073.1	MIR6726	0	0	0	0	0	0
ENSG00000169972.11	PUSL1	52.6409	62.9419	68.5477	88.8566	69.8181	75.5162
ENSG00000127054.18	CPSF3L	372.536	341.031	337.842	296.799	422.082	419.272
ENSG00000274153.1	MIR6727	0	0	0	0	0	0
ENSG00000240731.1	RP5-890O3.9	6.74884	3.43319	4.89626	7.32838	7.93388	10.2262
ENSG00000224051.6	CPTP	125.528	97.2739	58.7552	62.2912	122.182	153.392
ENSG00000169962.4	TAS1R3	6.74884	1.1444	0	2.74814	6.3471	0.786627
ENSG00000107404.17	DVL1	379.285	255.201	190.954	190.538	414.148	387.021
ENSG00000275884.1	MIR6808	0	0	0	0	0	0
ENSG00000162576.16	MXRA8	6.74884	3.43319	1.95851	4.58023	3.17355	3.93314
ENSG00000175756.13	AURKAIP1	584.449	740.426	497.46	427.794	591.867	729.203
ENSG00000223663.2	RP5-890O3.3	0	0	0	0	0	0
ENSG00000221978.11	CCNL2	249.707	230.024	254.606	424.13	469.685	294.985
ENSG00000224870.6	RP4-758J18.2	101.233	83.5411	111.635	107.177	76.1652	81.8092
ENSG00000242485.5	MRPL20	655.987	769.036	944	851.008	695.007	737.07
ENSG00000264293.2	RN7SL657P	0	0	0	0	0	0
ENSG00000272455.1	RP4-758J18.13	14.8474	13.7328	7.83402	12.8247	19.0413	29.8918
ENSG00000235098.8	ANKRD65	0	0	0	0	0	0
ENSG00000225905.1	RP4-758J18.7	0	0	0	0	0	0
ENSG00000205116.3	TMEM88B	0	0	0	0	0	0
ENSG00000225285.1	RP4-758J18.10	0	0	0	0	0	0
ENSG00000179403.11	VWA1	4.0493	11.444	11.751	5.49628	1.58678	3.14651
ENSG00000215915.9	ATAD3C	1.34977	3.43319	0	0	0	0
ENSG00000160072.19	ATAD3B	349.59	302.121	327.07	370.083	452.231	428.712
ENSG00000197785.13	ATAD3A	247.007	225.446	204.664	191.454	284.033	269.027
ENSG00000205090.8	TMEM240	0	1.1444	0.979253	0	0	0
ENSG00000160075.11	SSU72	1303.88	1169.58	777.527	990.247	1350.35	1257.82
ENSG00000215014.4	RP5-832C2.5	0	2.2888	1.95851	0.916047	4.76033	0.786627
ENSG00000279244.1	AL645728.1	0	0	0	0	0	0.786627
ENSG00000274481.1	RP11-345P4.11	0	0	0	0	0	0
ENSG00000280747.1	Metazoa_SRP	0	0	0	0	0	0
ENSG00000228594.3	C1orf233	18.8967	27.4656	0.979253	1.83209	26.9752	19.6657
ENSG00000272106.1	RP11-345P4.9	12.1479	5.72199	6.85477	1.83209	7.93388	6.29302
ENSG00000197530.12	MIB2	145.775	68.6639	39.1701	58.627	147.57	99.9017
ENSG00000189409.12	MMP23B	0	0	0	0	0	0.786627
ENSG00000248333.8	CDK11B	137.676	135.039	108.697	108.094	165.025	159.685
ENSG00000272004.1	RP11-345P4.10	0	0	0	0	0	0
ENSG00000189339.11	SLC35E2B	29.6949	49.2091	44.0664	38.474	49.19	71.5831
ENSG00000269737.1	RP11-345P4.7	1.34977	2.2888	0	1.83209	0	1.57325
ENSG00000269227.1	RP11-345P4.6	0	0	0.979253	1.83209	1.58678	2.35988
ENSG00000215914.4	MMP23A	0	0	0	0	0	0
ENSG00000008128.22	CDK11A	6.74884	13.7328	3.91701	10.0765	6.3471	8.6529
ENSG00000268575.1	RP1-283E3.8	1.34977	6.86639	2.93776	7.32838	11.1074	7.07965
ENSG00000227775.3	RP1-283E3.4	16.1972	8.01079	35.2531	43.0542	33.3223	25.1721
ENSG00000215790.6	SLC35E2	4.0493	5.72199	7.83402	5.49628	11.1074	9.43953
ENSG00000008130.15	NADK	184.918	153.349	262.44	296.799	220.562	210.816
ENSG00000078369.17	GNB1	1091.96	1078.02	1822.39	2282.79	1223.4	1349.07
ENSG00000231050.1	RP1-140A9.1	4.0493	1.1444	3.91701	4.58023	4.76033	6.29302
ENSG00000169885.9	CALML6	1.34977	0	0	1.83209	0	0
ENSG00000178821.12	TMEM52	13.4977	1.1444	0.979253	0.916047	9.52065	6.29302
ENSG00000142609.17	CFAP74	0	1.1444	0	0	0	0
ENSG00000233542.1	RP11-547D24.1	0	0	0	0	0	0
ENSG00000187730.7	GABRD	0	0	0	0	0	0
ENSG00000226969.1	RP11-547D24.3	0	0	0	0	0	0
ENSG00000067606.15	PRKCZ	0	0	24.4813	11.9086	0	0.786627
ENSG00000271806.1	RP5-892K4.1	0	0	0.979253	1.83209	0	0
ENSG00000182873.5	RP11-181G12.2	0	1.1444	0	3.66419	1.58678	2.35988
ENSG00000162585.16	FAAP20	47.2419	46.9203	50.9211	40.3061	53.9504	57.4238
ENSG00000234396.3	RP11-181G12.4	0	0	0	0	0	0
ENSG00000277082.1	AL590822.1	0	0	0	0	0	0
ENSG00000157933.9	SKI	71.5377	78.9635	109.676	117.254	112.661	177.778
ENSG00000116151.13	MORN1	53.9907	37.7651	41.1286	65.9554	71.4049	46.411
ENSG00000272161.1	RP4-713A8.1	0	0	0	0	0	0
ENSG00000269896.2	RP4-740C4.5	8.0986	5.72199	11.751	7.32838	4.76033	11.0128
ENSG00000272420.1	RP4-740C4.7	0	1.1444	0.979253	0.916047	1.58678	0
ENSG00000157916.18	RER1	855.752	942.984	940.083	814.366	953.652	1037.56
ENSG00000157911.9	PEX10	52.6409	52.6423	79.3195	90.6886	65.0578	64.5034
ENSG00000149527.17	PLCH2	4.0493	0	0	2.74814	1.58678	0
ENSG00000224387.1	RP3-395M20.2	0	0	0	0	0	0
ENSG00000229393.1	RP3-395M20.3	0	0	0	0	0	0
ENSG00000157881.13	PANK4	139.026	116.729	121.427	120.918	122.182	114.061
ENSG00000197921.5	HES5	0	0	0	0	1.58678	0
ENSG00000272449.1	RP3-395M20.12	1.34977	2.2888	0	0	3.17355	0.786627
ENSG00000238164.6	RP3-395M20.8	0	1.1444	1.95851	2.74814	0	0.786627
ENSG00000157873.17	TNFRSF14	4.0493	2.2888	27.4191	45.8023	7.93388	7.86627
ENSG00000225931.3	RP3-395M20.7	0	0	0	0	0	0
ENSG00000228037.1	RP3-395M20.9	0	0	0.979253	0.916047	0	1.57325
ENSG00000157870.14	FAM213B	110.681	89.2631	145.909	133.743	92.033	119.567
ENSG00000142606.15	MMEL1	0	0	0	0	0	0.786627
ENSG00000237058.1	RP13-436F16.1	0	0	0	0	0	0
ENSG00000215912.11	TTC34	0	1.1444	2.93776	3.66419	0	2.35988
ENSG00000233234.1	RP11-740P5.2	0	0	0	0	0	0
ENSG00000231630.1	RP11-740P5.3	0	0	0	0	0	0.786627
ENSG00000169717.6	ACTRT2	0	0	0	0	0	0
ENSG00000177133.10	LINC00982	0	0	0	0	0	0
ENSG00000142611.16	PRDM16	0	0	0	0	0	0.786627
ENSG00000226286.1	RP1-163G9.2	0	0	0	0	0	0
ENSG00000279839.1	RP11-193J6.1	0	0	0	0	0	0
ENSG00000272235.1	RP11-22L13.1	0	0	0.979253	0	0	0
ENSG00000130762.14	ARHGEF16	0	0	39.1701	53.1307	0	0
ENSG00000272088.1	RP11-168F9.2	0	0	0	0	0	0
ENSG00000162591.15	MEGF6	0	0	0	0	0	0
ENSG00000207776.1	MIR551A	0	0	0	0	0	0
ENSG00000238260.1	RP11-46F15.2	2.69953	0	0	0	0	0
ENSG00000158109.14	TPRG1L	64.7888	125.884	67.5684	50.3826	119.008	146.313
ENSG00000116213.15	WRAP73	220.012	218.58	67.5684	74.1998	209.454	202.95
ENSG00000078900.14	TP73	17.547	11.444	0	0	19.0413	22.0256
ENSG00000227589.1	RP5-1092A11.5	0	0	0	0	1.58678	1.57325
ENSG00000235131.1	RP5-1092A11.2	1.34977	3.43319	0	0.916047	1.58678	3.14651
ENSG00000227372.10	TP73-AS1	0	0	4.89626	8.24442	1.58678	0
ENSG00000276189.1	TP73-AS1	0	0	0	0	0	0
ENSG00000162592.8	CCDC27	1.34977	0	0	0	0	1.57325
ENSG00000235169.7	SMIM1	2.69953	0	0	0	1.58678	2.35988
ENSG00000130764.9	LRRC47	296.949	322.72	222.29	221.683	379.239	378.368
ENSG00000266075.2	RN7SL574P	0	0	0	0	1.58678	0
ENSG00000272153.1	RP1-286D6.5	1.34977	6.86639	0.979253	4.58023	15.8678	5.50639
ENSG00000116198.12	CEP104	188.967	181.959	155.701	163.972	268.165	270.6
ENSG00000169598.15	DFFB	41.8428	56.0755	80.2987	44.8863	57.1239	57.4238
ENSG00000198912.10	C1orf174	460.271	566.477	337.842	287.639	577.586	645.034
ENSG00000236423.5	LINC01134	0	1.1444	2.93776	3.66419	1.58678	3.93314
ENSG00000233304.6	LINC01346	1.34977	0	0	0	1.58678	0
ENSG00000226374.2	RP13-614K11.2	0	0	0	0	0	0
ENSG00000229280.1	EEF1DP6	0	0	0	0	0	0
ENSG00000235054.3	RP5-1166F10.1	0	0	0.979253	0	0	0
ENSG00000227169.2	RP1-37J18.1	0	0	0	0	0	0
ENSG00000232596.2	RP1-37J18.2	0	0	0	0	0	0.786627
ENSG00000196581.10	AJAP1	1.34977	0	5.87552	0.916047	0	0
ENSG00000277731.1	AL137795.1	0	0	0	0	0	0
ENSG00000231510.1	RP11-542C10.1	0	0	0	0	0	0
ENSG00000260972.1	RP1-58B11.1	0	0	0	0	0	0
ENSG00000264341.1	MIR4417	0	0	0	0	0	0
ENSG00000236948.1	RP11-154H17.1	0	0	0	0	0	0
ENSG00000216045.2	AL356693.1	0	0	0	0	0	0
ENSG00000264101.1	MIR4689	0	0	0	0	0	0
ENSG00000131697.17	NPHP4	33.7442	49.2091	35.2531	43.9703	57.1239	55.8505
ENSG00000266687.1	AL356261.1	0	0	0	0	0	0
ENSG00000069424.14	KCNAB2	313.146	422.283	15.668	12.8247	452.231	674.14
ENSG00000116254.17	CHD5	0	0	0	0	0	0
ENSG00000116251.9	RPL22	3833.34	3909.26	2943.63	2335.92	4243.04	3859.19
ENSG00000226944.1	RP1-120G22.11	1.34977	3.43319	11.751	6.41233	3.17355	0
ENSG00000158286.12	RNF207	14.8474	13.7328	18.6058	43.9703	15.8678	7.86627
ENSG00000116237.15	ICMT	1468.55	1112.36	1811.62	1715.76	1577.25	1459.19
ENSG00000225077.2	LINC00337	2.69953	1.1444	12.7303	8.24442	6.3471	0
ENSG00000173673.7	HES3	0	0	0	0	0	0
ENSG00000158292.6	GPR153	31.0446	13.7328	36.2324	41.2221	58.7107	48.7709
ENSG00000097021.19	ACOT7	230.81	289.533	455.353	329.777	242.777	423.205
ENSG00000271746.1	RP1-202O8.3	0	0	0	0	0	0
ENSG00000069812.11	HES2	1.34977	0	1.95851	0.916047	0	0.786627
ENSG00000187017.14	ESPN	1.34977	0	0	0.916047	0	0
ENSG00000265392.1	MIR4252	0	0	0	0	0	0
ENSG00000231868.1	RP1-202O8.2	0	0	0	0	0	0
ENSG00000215788.9	TNFRSF25	5.39907	1.1444	5.87552	7.32838	1.58678	1.57325
ENSG00000171680.20	PLEKHG5	26.9953	19.4548	26.4398	40.3061	34.9091	23.5988
ENSG00000162408.10	NOL9	682.982	544.734	570.904	534.971	771.173	802.36
ENSG00000253022.1	RNU6-731P	0	0	0	0.916047	1.58678	0
ENSG00000229519.2	RP11-58A11.2	0	3.43319	5.87552	10.9926	4.76033	6.29302
ENSG00000173662.19	TAS1R1	1.34977	2.2888	0	1.83209	0	0.786627
ENSG00000204859.11	ZBTB48	51.2912	56.0755	48.9626	62.2912	74.5784	51.9174
ENSG00000162413.16	KLHL21	114.73	143.05	143.95	199.698	139.636	195.87
ENSG00000116273.5	PHF13	75.587	78.9635	92.0498	73.2838	79.3388	105.408
ENSG00000041988.15	THAP3	120.129	138.472	135.137	101.681	150.744	143.953
ENSG00000007923.15	DNAJC11	330.693	345.608	376.033	389.32	393.52	383.087
ENSG00000228750.6	RP11-242F24.1	0	0	0	0	0	0
ENSG00000237436.1	RP11-312B8.1	0	1.1444	1.95851	0	0	0.786627
ENSG00000171735.18	CAMTA1	152.524	125.884	237.958	209.775	165.025	148.673
ENSG00000227950.1	RP11-312B8.2	0	0	0	0	0	0.786627
ENSG00000237365.1	RP11-334N17.1	0	0	0	0	0	0
ENSG00000207056.1	RNU1-8P	0	0	0	0	0	0
ENSG00000280801.1	Z98052.1	0	0	0	0	0	0
ENSG00000237402.1	CAMTA1-IT1	0	0	0	0	0	0
ENSG00000237728.2	RP3-453P22.2	0	0	0	0	1.58678	0
ENSG00000225126.1	RP4-549F15.1	0	0	0	0	0	0.786627
ENSG00000270171.1	RP11-338N10.1	0	0	0	0	0	0
ENSG00000270035.1	RP11-338N10.2	0	0	0	0	0	0
ENSG00000269978.1	RP11-338N10.3	0	0	0.979253	0	0	0
ENSG00000049245.12	VAMP3	589.848	600.809	819.635	760.319	685.487	741.789
ENSG00000269925.1	RP3-467L1.6	2.69953	2.2888	2.93776	3.66419	4.76033	5.50639
ENSG00000049246.14	PER3	74.2372	102.996	195.851	339.853	104.727	107.768
ENSG00000236266.1	RP3-467L1.4	0	3.43319	2.93776	2.74814	0	0
ENSG00000049247.13	UTS2	0	1.1444	0	0	0	0
ENSG00000049249.8	TNFRSF9	8.0986	5.72199	5.87552	1.83209	4.76033	8.6529
ENSG00000270330.1	RP5-892F13.2	0	0	0	0	0	0
ENSG00000116288.12	PARK7	2359.39	2827.81	2748.76	2157.29	2599.14	2747.69
ENSG00000200344.1	Y_RNA	1.34977	0	0	0	3.17355	0.786627
ENSG00000116285.12	ERRFI1	3854.94	3139.08	1725.44	1497.74	3371.9	2829.5
ENSG00000238290.1	RP11-431K24.1	2.69953	2.2888	0.979253	5.49628	4.76033	1.57325
ENSG00000232848.1	CTA-215D11.4	6.74884	3.43319	0.979253	2.74814	7.93388	2.35988
ENSG00000229305.1	RP11-431K24.2	0	0	0	0	0	0
ENSG00000227634.2	RP11-431K24.3	0	0	0	0	0	0
ENSG00000200975.1	RNU1-7P	0	0	0	0	0	0
ENSG00000233645.1	RP11-431K24.4	0	0	0	0	0	0
ENSG00000251977.1	RNU6-991P	0	0	0	0	0	0.786627
ENSG00000162426.14	SLC45A1	0	0	10.7718	8.24442	1.58678	3.93314
ENSG00000252254.1	Y_RNA	0	0	0	0.916047	0	0
ENSG00000142599.17	RERE	70.1879	84.6855	116.531	100.765	103.14	158.899
ENSG00000232912.5	RP5-1115A15.1	2.69953	0	0.979253	1.83209	0	0
ENSG00000221083.1	SNORA77	0	0	0	0	0	0
ENSG00000270282.1	RP5-1115A15.2	0	0	0	0	0	0
ENSG00000280851.1	AL096855.1	0	0	0	0	0	0
ENSG00000234619.1	RPL7P11	0	4.57759	0	2.74814	0	3.14651
ENSG00000224315.2	RPL7P7	1.34977	0	0	1.83209	3.17355	1.57325
ENSG00000222511.2	Y_RNA	0	0	0	0	0	0
ENSG00000226545.1	RP4-633I8.3	0	0	0	0.916047	3.17355	0.786627
ENSG00000228423.2	RP4-633I8.4	0	0	0	1.83209	1.58678	0.786627
ENSG00000229716.2	RPL23AP19	0	0	0	0	0	0
ENSG00000074800.13	ENO1	20168.2	23087.1	25366.6	20239.1	22762.3	26827.9
ENSG00000280816.1	Metazoa_SRP	1.34977	3.43319	2.93776	8.24442	4.76033	6.29302
ENSG00000274258.1	MIR6728	0	0	0	0.916047	1.58678	0
ENSG00000236269.1	ENO1-IT1	16.1972	11.444	11.751	25.6493	22.2149	14.9459
ENSG00000230679.1	ENO1-AS1	0	0	0.979253	1.83209	1.58678	0
ENSG00000201725.1	RNU6-304P	0	0	0	0	0	0
ENSG00000238249.2	HMGN2P17	5.39907	6.86639	0	8.24442	15.8678	14.9459
ENSG00000232208.2	RP3-477M7.5	0	0	0	0	0	0
ENSG00000232663.2	RP3-477M7.6	0	1.1444	0	0	0	0
ENSG00000131686.14	CA6	2.69953	2.2888	0.979253	0	3.17355	0.786627
ENSG00000265141.2	RN7SL451P	0	0	0	0	0	0
ENSG00000197241.3	SLC2A7	0	1.1444	0	0	0	0.786627
ENSG00000142583.17	SLC2A5	0	0	0	0.916047	0	0.786627
ENSG00000252404.1	SCARNA16	0	0	0	0	0	0
ENSG00000281506.1	AL158048.1	0	0	0	0	0	0
ENSG00000180758.11	GPR157	41.8428	36.6207	50.9211	55.8789	34.9091	55.0639
ENSG00000228526.4	MIR34AHG	5.39907	2.2888	14.6888	124.582	1.58678	6.29302
ENSG00000207865.1	MIR34A	0	0	0	0	0	0
ENSG00000234546.3	RP3-510D11.2	0	0	5.87552	9.16047	0	1.57325
ENSG00000281937.1	RP3-510D11.4	0	1.1444	0	0	1.58678	0
ENSG00000049239.12	H6PD	32.3944	41.1983	178.224	150.232	42.8429	89.6755
ENSG00000171621.13	SPSB1	183.568	185.393	109.676	138.323	257.058	278.466
ENSG00000252956.1	RNA5SP40	0	0	0	0	0	0
ENSG00000235263.1	RP13-392I16.1	0	0	0	0	0	0
ENSG00000171612.6	SLC25A33	314.496	430.294	152.763	141.987	409.388	460.964
ENSG00000231181.1	RP13-15M17.1	2.69953	2.2888	0	2.74814	1.58678	0.786627
ENSG00000188807.12	TMEM201	117.43	121.306	121.427	118.17	160.264	169.125
ENSG00000171608.15	PIK3CD	213.263	186.537	494.523	512.07	245.95	346.903
ENSG00000179840.5	PIK3CD-AS1	0	0	0	0	1.58678	0
ENSG00000233268.3	RP11-558F24.2	0	0	0	0	1.58678	0
ENSG00000231789.2	PIK3CD-AS2	21.5963	18.3104	10.7718	8.24442	15.8678	23.5988
ENSG00000171603.16	CLSTN1	408.979	455.471	913.643	662.302	415.735	570.305
ENSG00000271264.1	MZT1P1	0	0	0	0	1.58678	0
ENSG00000280113.1	AL357140.1	0	0	0	0	0	0
ENSG00000178585.14	CTNNBIP1	59.3898	102.996	1002.75	958.185	44.4297	83.3825
ENSG00000223989.1	RP11-84A14.5	0	0	0	0	0	0
ENSG00000162441.11	LZIC	284.801	280.378	771.651	549.628	331.636	363.422
ENSG00000228150.1	RP11-84A14.4	2.69953	2.2888	2.93776	4.58023	0	2.35988
ENSG00000173614.13	NMNAT1	40.493	48.0647	365.261	225.348	44.4297	57.4238
ENSG00000202415.1	RN7SKP269	1.34977	1.1444	2.93776	10.9926	4.76033	5.50639
ENSG00000265521.1	MIR5697	0	0	0	0.916047	0	0
ENSG00000241326.1	RP11-807G9.2	0	0	0	0	0	0
ENSG00000162444.11	RBP7	349.59	371.929	23.5021	13.7407	152.33	147.886
ENSG00000130939.18	UBE4B	283.451	274.656	553.278	426.878	323.702	487.709
ENSG00000224340.1	RP11-496H15.2	0	0	0	0.916047	1.58678	0
ENSG00000233623.2	PGAM1P11	0	1.1444	0	0	0	0
ENSG00000201746.1	RNU6-828P	0	0	0	0.916047	0	0
ENSG00000054523.17	KIF1B	548.006	500.102	681.56	785.052	637.884	814.159
ENSG00000264881.1	MIR1273D	0	0	0	0	0	0
ENSG00000199562.1	RNU6-37P	1.34977	1.1444	0	1.83209	1.58678	0
ENSG00000264501.2	RN7SL731P	0	0	0	0	0	0
ENSG00000142657.20	PGD	2112.39	1907.71	1726.42	1244.91	2188.16	2108.95
ENSG00000271989.1	RP4-736L20.3	0	0	0	2.74814	1.58678	0
ENSG00000251503.8	APITD1-CORT	0	2.2888	1.95851	0.916047	0	0.786627
ENSG00000175279.21	APITD1	12.1479	20.5992	26.4398	16.4888	25.3884	25.1721
ENSG00000241563.3	CORT	1.34977	1.1444	0.979253	2.74814	3.17355	0.786627
ENSG00000160049.11	DFFA	2827.76	3068.13	1458.11	1230.25	2979.96	2775.22
ENSG00000203469.2	RP5-1113E3.3	0	0	0	0	0	0
ENSG00000142655.12	PEX14	110.681	131.606	127.303	152.064	114.248	121.141
ENSG00000243267.3	RN7SL614P	1.34977	0	0	0	0	0
ENSG00000130940.14	CASZ1	24.2958	21.7436	3.91701	5.49628	19.0413	12.586
ENSG00000272078.1	RP4-734G22.3	4.0493	0	0.979253	0.916047	0	0.786627
ENSG00000225158.2	HSPE1P24	0	0	0	0	0	0
ENSG00000175262.14	C1orf127	0	0	0	0	0	0
ENSG00000215785.2	CFL1P6	0	0	0	0	0	0
ENSG00000264181.1	AL713997.1	0	0	0	0	0	0
ENSG00000281322.1	Y_RNA	0	0	0	0	0	0
ENSG00000120948.15	TARDBP	311.796	346.753	373.095	378.327	317.355	360.275
ENSG00000277726.4	RP4-635E18.9	0	0	0	0	0	0
ENSG00000009724.16	MASP2	4.0493	2.2888	9.79253	7.32838	3.17355	3.14651
ENSG00000271895.2	RP4-635E18.8	2.69953	2.2888	6.85477	9.16047	4.76033	3.93314
ENSG00000116649.9	SRM	186.268	265.5	147.867	230.844	231.669	343.756
ENSG00000171824.13	EXOSC10	731.574	806.801	1215.25	1033.3	894.941	1010.03
ENSG00000226849.1	RP4-635E18.7	0	2.2888	1.95851	3.66419	0	0.786627
ENSG00000281350.1	Metazoa_SRP	0	0	0	0	0	0
ENSG00000230337.1	RP4-635E18.6	1.34977	1.1444	2.93776	2.74814	3.17355	3.14651
ENSG00000198793.12	MTOR	961.034	740.426	713.875	623.828	1072.66	1179.15
ENSG00000225602.5	MTOR-AS1	0	0	1.95851	0.916047	1.58678	3.14651
ENSG00000253086.1	RNU6-537P	0	0	0	0.916047	1.58678	0
ENSG00000171819.4	ANGPTL7	2.69953	0	0	2.74814	3.17355	2.35988
ENSG00000207451.1	RNU6-291P	0	0	0.979253	2.74814	1.58678	0
ENSG00000238173.1	RPL39P6	8.0986	8.01079	6.85477	1.83209	0	6.29302
ENSG00000120942.13	UBIAD1	209.214	256.345	176.265	163.056	252.297	250.934
ENSG00000238199.1	UBE2V2P3	2.69953	1.1444	0.979253	0.916047	1.58678	1.57325
ENSG00000224338.2	RP11-149P14.1	0	0	0	0	0	0
ENSG00000204624.7	PTCHD2	0	0	0	0	0	0
ENSG00000235643.1	RP1-69M21.2	1.34977	0	0	0.916047	1.58678	0.786627
ENSG00000116661.9	FBXO2	0	0	15.668	5.49628	1.58678	0.786627
ENSG00000132879.13	FBXO44	59.3898	37.7651	65.6099	76.9479	38.0826	32.2517
ENSG00000116663.10	FBXO6	6.74884	5.72199	23.5021	19.237	7.93388	1.57325
ENSG00000116670.14	MAD2L2	464.32	452.037	359.386	333.441	379.239	394.887
ENSG00000162490.6	DRAXIN	0	0	0	0	0	0
ENSG00000177674.15	AGTRAP	66.1386	75.5303	108.697	86.1084	57.1239	57.4238
ENSG00000215910.7	C1orf167	0	0	0	0	0	0
ENSG00000177553.6	RP11-56N19.5	0	0	0	0	0	0
ENSG00000177000.10	MTHFR	16.1972	8.01079	40.1494	51.2986	30.1487	22.0256
ENSG00000011021.21	CLCN6	105.282	80.1079	68.5477	94.3528	144.397	95.1819
ENSG00000242349.5	NPPA-AS1	2.69953	0	0.979253	0	4.76033	1.57325
ENSG00000276470.1	NPPA-AS1_1	0	0	0	0	0	0
ENSG00000278852.1	NPPA-AS1_2	0	0	0	0	0	0
ENSG00000175206.10	NPPA	0	0	0.979253	0	0	0
ENSG00000275915.1	NPPA-AS1_3	0	0	0	0	0	0
ENSG00000120937.8	NPPB	0	0	5.87552	6.41233	0	0
ENSG00000224904.1	RP5-934G17.6	0	0	0	0	0	0
ENSG00000199347.1	RNU5E-1	4.0493	5.72199	5.87552	10.9926	7.93388	11.7994
ENSG00000201801.1	RNU5E-4P	0	2.2888	4.89626	3.66419	1.58678	6.29302
ENSG00000116685.15	KIAA2013	468.369	425.716	445.56	429.626	566.479	618.289
ENSG00000083444.16	PLOD1	395.482	511.546	1229.94	1002.16	472.859	765.388
ENSG00000116688.16	MFN2	1208.04	1021.95	926.373	982.918	1369.39	1294.79
ENSG00000270914.1	RP5-1077B9.5	0	0	0	0	0	0
ENSG00000116691.10	MIIP	112.031	86.9743	68.5477	64.1233	111.074	126.647
ENSG00000202461.1	Y_RNA	0	0	0	0	0	0
ENSG00000276869.1	MIR6729	0	0	0	0	0	0
ENSG00000243539.3	RN7SL649P	0	0	0	0	0	0
ENSG00000120949.14	TNFRSF8	0	0	0	0	0	0.786627
ENSG00000281342.1	Metazoa_SRP	0	0	0	0	0	0
ENSG00000201135.1	RNU6-777P	0	0	0	0	0	0
ENSG00000227875.2	RPL23AP89	0	0	0	0	0	0
ENSG00000275459.1	MIR7846	0	0	0	0	0	0
ENSG00000028137.16	TNFRSF1B	0	2.2888	11.751	8.24442	0	3.14651
ENSG00000263676.1	MIR4632	0	0	0	0	0	0
ENSG00000225196.2	RP5-1118D24.2	0	0	0	0	0	0
ENSG00000252969.1	SNORA70	0	0	0	0	0	0
ENSG00000048707.13	VPS13D	298.299	248.334	429.892	447.031	315.768	345.329
ENSG00000280999.1	AC243836.1	0	0	0	0	0	0
ENSG00000239149.1	SNORA59A	0	1.1444	0	0	0	1.57325
ENSG00000229484.1	RP5-888M10.2	0	0	0	0	0	0
ENSG00000162496.8	DHRS3	0	4.57759	1206.44	661.386	0	7.86627
ENSG00000221340.1	RNU6ATAC18P	0	0	0.979253	0.916047	0	0
ENSG00000276830.1	MIR6730	0	0	0	0	0	0
ENSG00000272482.1	RP11-474O21.5	1.34977	1.1444	18.6058	18.3209	0	3.93314
ENSG00000204518.2	AADACL4	0	0	0	0	0	0
ENSG00000226166.2	RP11-474O21.2	0	0	0	0	0	0
ENSG00000188984.11	AADACL3	1.34977	0	0.979253	0	0	0
ENSG00000157330.9	C1orf158	0	0	0	0	0	0
ENSG00000116726.4	PRAMEF12	0	0	0	0	0	0
ENSG00000116721.9	PRAMEF1	0	0	0	0	0	0
ENSG00000228338.1	RP5-845O24.8	0	0	0	0	0	0
ENSG00000239810.3	PRAMEF11	0	0	0	0	0	0.786627
ENSG00000231103.2	PRAMEF30P	0	0	0	0	0	0
ENSG00000179172.8	HNRNPCL1	24.2958	11.444	2.93776	4.58023	7.93388	10.2262
ENSG00000120952.4	PRAMEF2	0	0	0	0	0	0.786627
ENSG00000243073.3	PRAMEF4	0	0	0	0	0	0
ENSG00000187545.5	PRAMEF10	0	0	0	0	0	2.35988
ENSG00000204510.5	PRAMEF7	0	0	0	0	0	0
ENSG00000207434.1	RNU6-1072P	0	0	0	0	0	0
ENSG00000234064.1	PRAMEF29P	0	0	0	0	0	0
ENSG00000232423.5	PRAMEF6	0	0	0	0	0	0
ENSG00000274178.2	PRAMEF28	0	0	0	0	0	0
ENSG00000274764.5	PRAMEF27	0	0	0	0	0	0
ENSG00000280267.3	PRAMEF26	0	0	0	0	0	0
ENSG00000229571.6	PRAMEF25	0	0	0	0	0	0
ENSG00000277058.2	HNRNPCL3	4.0493	5.72199	0	0.916047	1.58678	3.93314
ENSG00000277862.1	PRAMEF34P	0	0	0	0	0	0
ENSG00000236179.1	PRAMEF35P	0	0	0	0	0	0
ENSG00000275774.2	HNRNPCL2	0	0	1.95851	0	0	0
ENSG00000229978.1	PRAMEF36P	0	0	0	0	0	0
ENSG00000233336.1	RP13-221M14.2	0	0	0	0	0	0
ENSG00000179412.10	HNRNPCL4	0	1.1444	0	0	0	0
ENSG00000204505.4	PRAMEF9	0	0	0	0	0	0
ENSG00000279169.1	PRAMEF13	0	0	0	0	0	0
ENSG00000279804.1	PRAMEF18	0	0	0	0	0	0
ENSG00000250894.1	PRAMEF31P	0	0	0	0	0	0
ENSG00000270601.4	PRAMEF5	0	0	0	0	0	0
ENSG00000231219.1	PRAMEF32P	0	0	0	0	0	0
ENSG00000207511.1	RNU6-771P	0	0	0	0	0	0
ENSG00000182330.10	PRAMEF8	0	0	0	0	0	0
ENSG00000204501.6	PRAMEF15	0	1.1444	0	0	0	0
ENSG00000237700.1	PRAMEF33P	0	0	0	0	0	0
ENSG00000228229.2	RP11-219C24.10	0	0	0	0	0	0
ENSG00000204481.7	PRAMEF14	0	0	0	0	0	0
ENSG00000204480.7	PRAMEF19	0	0	0	0	0	0
ENSG00000204479.4	PRAMEF17	0	0	0	0	0	0
ENSG00000204478.9	PRAMEF20	0	0	0	0	1.58678	0
ENSG00000162494.5	LRRC38	0	0	0	0	0	0
ENSG00000259961.1	RP4-597A16.2	0	0	0	0	0	0
ENSG00000215909.3	BRWD1P1	0	0	0	0	0	0
ENSG00000162493.16	PDPN	1.34977	0	0	0	0	0
ENSG00000222952.1	RNA5SP41	0	0	0	0	0	0
ENSG00000266358.1	AL359771.1	0	0	0	0	0	0
ENSG00000237445.2	CTA-520D8.2	0	0	0	0	0	0
ENSG00000253085.1	SCARNA11	0	0	0	0	0	0
ENSG00000116731.22	PRDM2	103.932	102.996	134.158	157.56	126.942	140.02
ENSG00000252151.1	RNU6-1265P	0	0	0	0	0	0
ENSG00000231606.1	RP11-344F13.1	0	0	0	0	0	0
ENSG00000234593.2	RP4-704D23.1	0	0	0.979253	3.66419	0	1.57325
ENSG00000189337.15	KAZN	17.547	17.166	11.751	9.16047	6.3471	12.586
ENSG00000280763.1	AL034395.1	0	0	0	0	0	0
ENSG00000235829.1	TBCAP2	0	0	0	0	1.58678	0
ENSG00000175147.11	TMEM51-AS1	0	1.1444	1.95851	0.916047	1.58678	0.786627
ENSG00000171729.13	TMEM51	75.587	92.6963	175.286	169.469	109.487	133.727
ENSG00000204464.7	C1orf195	2.69953	0	0	4.58023	0	0.786627
ENSG00000215720.4	RP1-21O18.3	0	1.1444	0	0.916047	1.58678	0
ENSG00000278480.1	RP5-903E17.2	1.34977	2.2888	0	0.916047	1.58678	0.786627
ENSG00000142621.19	FHAD1	102.582	73.2415	23.5021	40.3061	82.5123	91.2488
ENSG00000233485.1	RP3-467K16.2	1.34977	1.1444	0	0	1.58678	0
ENSG00000236045.1	RP3-467K16.7	0	3.43319	0	0	1.58678	0.786627
ENSG00000228140.1	RP3-467K16.4	0	1.1444	0	1.83209	0	0
ENSG00000142634.12	EFHD2	391.433	588.221	636.514	543.216	537.917	836.185
ENSG00000162438.11	CTRC	0	0	0	0.916047	0	0
ENSG00000142615.7	CELA2A	0	0	0	0	0	0
ENSG00000215704.9	CELA2B	0	0	0	0	0	0.786627
ENSG00000132906.17	CASP9	39.1433	49.2091	16.6473	12.8247	47.6033	47.9843
ENSG00000116138.12	DNAJC16	225.411	249.479	195.851	242.752	257.058	346.903
ENSG00000251866.1	SCARNA21	0	0	0	0	0	0
ENSG00000272510.1	RP4-680D5.8	0	1.1444	0	0	3.17355	0
ENSG00000116771.5	AGMAT	53.9907	52.6423	32.3153	31.1456	30.1487	28.3186
ENSG00000237301.1	RP4-680D5.2	1.34977	0	0	0	0	1.57325
ENSG00000235084.3	CHCHD2P6	12.1479	14.8772	12.7303	8.24442	12.6942	11.7994
ENSG00000252417.1	RNU7-179P	0	0	0	0	0	0
ENSG00000236500.1	RP4-680D5.4	0	0	0	0	0	0
ENSG00000197312.11	DDI2	178.169	152.205	163.535	205.195	282.446	298.918
ENSG00000215695.1	RSC1A1	0	0	0	0	0	0
ENSG00000271742.1	RP4-680D5.9	0	0	0	0	0	0.786627
ENSG00000116786.11	PLEKHM2	352.289	288.388	255.585	287.639	428.429	476.696
ENSG00000264048.1	AL121992.1	0	0	0	0	0	0
ENSG00000237938.5	RP11-288I21.1	6.74884	4.57759	4.89626	10.9926	7.93388	6.29302
ENSG00000162461.7	SLC25A34	6.74884	9.15519	0	6.41233	11.1074	6.29302
ENSG00000224459.1	RP11-169K16.4	9.44837	24.0324	2.93776	1.83209	6.3471	7.07965
ENSG00000162460.6	TMEM82	6.74884	1.1444	0	1.83209	1.58678	5.50639
ENSG00000162458.12	FBLIM1	193.017	240.324	266.357	204.278	195.173	294.985
ENSG00000280788.1	Metazoa_SRP	0	0	0	0	0	0
ENSG00000224321.1	RPL12P14	6.74884	28.61	11.751	7.32838	7.93388	18.0924
ENSG00000233954.6	UQCRHL	1742.55	1881.39	558.174	574.361	1827.96	1902.06
ENSG00000178715.8	RP11-169K16.8	13.4977	25.1768	1.95851	4.58023	11.1074	19.6657
ENSG00000179743.4	FLJ37453	29.6949	27.4656	10.7718	19.237	31.7355	24.3854
ENSG00000065526.10	SPEN	191.667	258.634	354.489	369.167	271.339	404.326
ENSG00000270620.1	RP1-134O19.3	1.34977	2.2888	1.95851	3.66419	1.58678	0
ENSG00000116809.11	ZBTB17	110.681	92.6963	97.9253	119.086	128.529	133.727
ENSG00000234607.2	RP11-5P18.1	0	0	0	2.74814	0	0.786627
ENSG00000231353.1	RP11-5P18.3	0	0	0	0	0	0
ENSG00000275503.1	RP11-5P18.11	0	0	0	0	0	0
ENSG00000224966.4	TBC1D3P6	0	0	0	0	0	0
ENSG00000183888.4	C1orf64	0	0	0	0	0	0
ENSG00000233078.1	RP11-5P18.5	0	0	0	0	0	0
ENSG00000173641.17	HSPB7	0	0	0	0	0	0.786627
ENSG00000186510.11	CLCNKA	0	0	0	0.916047	0	0
ENSG00000232456.1	RP11-5P18.10	1.34977	0	0	0	0	0.786627
ENSG00000184908.17	CLCNKB	1.34977	0	0	0	0	1.57325
ENSG00000185519.8	FAM131C	2.69953	1.1444	0	0	1.58678	0.786627
ENSG00000142627.12	EPHA2	815.259	876.609	1419.92	1495.9	1012.36	1219.27
ENSG00000227959.1	RP11-276H7.2	1.34977	2.2888	0.979253	6.41233	3.17355	2.35988
ENSG00000224621.1	RP11-276H7.3	2.69953	0	0	1.83209	4.76033	1.57325
ENSG00000234166.1	ARHGEF19-AS1	0	0	0	0	0	0
ENSG00000142632.16	ARHGEF19	12.1479	5.72199	28.3983	27.4814	17.4545	15.7325
ENSG00000237276.8	ANO7P1	1.34977	1.1444	1.95851	0.916047	0	0.786627
ENSG00000132881.11	RSG1	2.69953	4.57759	9.79253	6.41233	9.52065	4.71976
ENSG00000233929.1	MT1XP1	0	0	0	0.916047	0	0
ENSG00000037637.10	FBXO42	110.681	85.8299	126.324	130.079	134.876	145.526
ENSG00000055070.16	SZRD1	592.548	704.949	465.145	502.91	639.47	834.611
ENSG00000226457.1	RP11-430L17.1	0	2.2888	1.95851	2.74814	7.93388	3.14651
ENSG00000187144.11	SPATA21	1.34977	0	0.979253	1.83209	1.58678	0.786627
ENSG00000281598.1	AL358794.1	0	0	0	0	0	0
ENSG00000157191.19	NECAP2	522.36	601.953	593.427	428.71	501.421	563.225
ENSG00000226029.1	RP4-798A10.2	8.0986	5.72199	3.91701	12.8247	7.93388	6.29302
ENSG00000080947.14	CROCCP3	28.3451	6.86639	8.81327	38.474	19.0413	25.1721
ENSG00000206652.1	RNU1-1	10.7981	17.166	27.4191	27.4814	20.6281	12.586
ENSG00000261135.1	RP4-798A10.7	4.0493	6.86639	2.93776	2.74814	3.17355	4.71976
ENSG00000224174.2	RP4-798A10.4	1.34977	0	0.979253	0	0	0
ENSG00000233421.4	RP5-875O13.1	0	4.57759	1.95851	9.16047	6.3471	1.57325
ENSG00000277344.1	RNU1-6P	0	0	0	0	0	0
ENSG00000268991.2	FAM231C	0	0	0	0	0	0
ENSG00000225710.1	RP5-875O13.6	0	0	0	0	0	0
ENSG00000266584.1	AL355149.1	0	0	0	0	0	0
ENSG00000219481.10	NBPF1	48.5916	52.6423	58.7552	91.6047	98.3801	110.914
ENSG00000271732.1	RP5-1182A14.5	1.34977	0	0	0.916047	0	0
ENSG00000215908.8	CROCCP2	41.8428	30.8988	28.3983	43.9703	66.6446	61.3569
ENSG00000186301.8	MST1P2	0	0	1.95851	0	3.17355	3.14651
ENSG00000282143.1	RP1-163M9.8	0	0	0	0	0	0
ENSG00000207513.1	RNU1-3	1.34977	0	0	0	0	3.14651
ENSG00000237847.2	FAM231A	0	0	0	0	0	0
ENSG00000280114.1	RP5-875O13.7	0	0	0	0	0	0
ENSG00000264742.1	AL021920.1	0	0	0	0	0	0
ENSG00000236698.1	EIF1AXP1	17.547	11.444	5.87552	9.16047	14.281	11.0128
ENSG00000268869.5	ESPNP	0	0	0	0	1.58678	0
ENSG00000279151.1	RP1-163M9.7	0	1.1444	0	0	0	0
ENSG00000279132.1	FAM231C	0	0	0	0	0	0
ENSG00000282740.1	RP5-1182A14.7	0	0	0	0	0	0
ENSG00000058453.16	CROCC	67.4884	65.2307	13.7095	15.5728	161.851	117.207
ENSG00000227684.2	CROCCP4	0	0	0	0	0	0
ENSG00000207389.1	RNU1-4	0	0	0	0	0	0
ENSG00000186715.10	MST1L	0	1.1444	0.979253	0.916047	0	0
ENSG00000223643.6	RP11-108M9.1	0	0	0	0	0	0
ENSG00000230239.1	RP11-108M9.2	0	0	0	0	0	0
ENSG00000263811.1	MIR3675	0	0	0	0	0	0
ENSG00000228549.3	RP11-108M9.3	5.39907	4.57759	9.79253	10.0765	9.52065	6.29302
ENSG00000277234.1	RNU1-5P	0	0	0	0	0	0
ENSG00000238142.1	RP11-108M9.4	2.69953	3.43319	3.91701	3.66419	4.76033	5.50639
ENSG00000235241.1	RP11-108M9.5	1.34977	1.1444	0	0.916047	3.17355	1.57325
ENSG00000207005.1	RNU1-2	18.8967	13.7328	39.1701	34.8098	17.4545	17.3058
ENSG00000272426.1	RP11-108M9.6	1.34977	1.1444	0	0.916047	0	2.35988
ENSG00000117122.13	MFAP2	180.869	274.656	0	0.916047	255.471	282.399
ENSG00000226526.1	RP1-37C10.3	1.34977	0	0	0	0	0.786627
ENSG00000159363.17	ATP13A2	180.869	197.981	165.494	158.476	218.975	276.106
ENSG00000117118.9	SDHB	1287.68	1332.08	1083.05	805.205	1285.29	1323.11
ENSG00000117115.12	PADI2	0	0	0.979253	1.83209	0	0
ENSG00000281330.1	Y_RNA	0	0	0	0	0	0
ENSG00000204362.6	RP11-380J14.1	0	0	0	0.916047	0	1.57325
ENSG00000282843.1	RP11-380J14.4	0	0	0	0	0	0
ENSG00000142623.9	PADI1	0	2.2888	5.87552	6.41233	0	1.57325
ENSG00000142619.4	PADI3	1.34977	2.2888	19.5851	23.8172	0	2.35988
ENSG00000266634.1	MIR3972	0	0	0	0	0	0
ENSG00000159339.13	PADI4	0	0	14.6888	21.9851	0	0
ENSG00000280226.1	AC004824.2	0	0	0	0	0	0
ENSG00000276747.1	PADI6	0	0	0	0	0	0.786627
ENSG00000227751.1	RP1-20B21.4	0	0	0	0	0	0
ENSG00000179051.13	RCC2	777.466	845.71	1087.95	1014.98	963.172	1091.84
ENSG00000266727.1	AC004824.1	0	0	0	0	0	0
ENSG00000074964.16	ARHGEF10L	32.3944	40.0539	23.5021	32.0616	33.3223	58.997
ENSG00000236648.1	RP11-473A10.2	0	0	0	0	0	0
ENSG00000278471.1	AL136529.1	0	0	0	0	0	0
ENSG00000117148.7	ACTL8	0	1.1444	3.91701	1.83209	0	0
ENSG00000261781.1	RP11-174G17.2	0	0	0	0	0	0
ENSG00000117154.11	IGSF21	0	0	0	0	0	0
ENSG00000280222.1	RP11-174G17.3	0	0	0	0	0	0
ENSG00000230035.2	RP11-174G17	0	0	0	0	0	0
ENSG00000225387.1	RP11-422P22.1	0	0	0	0	0	0
ENSG00000179023.8	KLHDC7A	6.74884	1.1444	0	0.916047	1.58678	0
ENSG00000235282.3	DYNLL1P3	0	0	0	0.916047	0	0
ENSG00000225478.2	RP1-8B22.2	0	0	0	0	0	0
ENSG00000009709.11	PAX7	0	0	0.979253	0	0	0
ENSG00000179002.5	TAS1R2	0	0	0	0	0	0
ENSG00000255275.3	RP13-279N23.2	0	0	0.979253	0	0	0
ENSG00000159423.16	ALDH4A1	26.9953	26.3212	6.85477	17.4049	31.7355	31.4651
ENSG00000265606.1	MIR4695	0	0	0	0	0	0
ENSG00000221662.1	MIR1290	0	0	0	0	0	0
ENSG00000169991.10	IFFO2	241.608	279.233	91.0705	90.6886	315.768	446.804
ENSG00000272084.1	RP5-1126H10.2	0	1.1444	0	1.83209	1.58678	2.35988
ENSG00000127481.14	UBR4	913.792	702.661	490.606	701.692	1158.35	1156.34
ENSG00000230424.1	RP1-43E13.2	2.69953	1.1444	1.95851	0.916047	3.17355	0
ENSG00000127463.13	EMC1	993.429	1123.8	1176.08	907.803	1050.45	1289.28
ENSG00000053372.4	MRTO4	1172.95	1486.57	903.85	783.22	1175.8	1383.68
ENSG00000211454.13	AKR7L	0	0	1.95851	0.916047	1.58678	0
ENSG00000162482.4	AKR7A3	1.34977	0	3.91701	2.74814	4.76033	3.93314
ENSG00000270728.1	RP4-657E11.10	0	1.1444	2.93776	3.66419	1.58678	1.57325
ENSG00000053371.12	AKR7A2	309.097	307.843	299.651	219.851	293.553	306.785
ENSG00000200403.1	RNU6-1099P	2.69953	3.43319	0.979253	7.32838	6.3471	1.57325
ENSG00000040487.12	PQLC2	71.5377	80.1079	89.112	98.017	104.727	107.768
ENSG00000077549.17	CAPZB	539.907	532.145	842.157	635.737	595.041	743.363
ENSG00000240490.3	RN7SL277P	9.44837	2.2888	1.95851	2.74814	0	0
ENSG00000201609.1	RNU4-28P	0	0	0	0	0	0
ENSG00000235185.1	RP5-1056L3.1	0	0	0	0	0	0
ENSG00000173436.13	MINOS1	132.277	173.949	313.361	240.92	188.826	179.351
ENSG00000270136.5	MINOS1-NBL1	0	0	0	0	0	0
ENSG00000226396.1	RP5-1056L3.3	2.69953	5.72199	0.979253	4.58023	6.3471	4.71976
ENSG00000158747.13	NBL1	78.2865	84.6855	126.324	82.4442	68.2313	64.5034
ENSG00000158748.3	HTR6	0	0	5.87552	0	0	0
ENSG00000162542.13	TMCO4	49.9414	51.4979	96.946	97.101	69.8181	83.3825
ENSG00000178828.6	RNF186	0	0	0	0	0	0
ENSG00000235434.1	RP11-91K11.2	0	0	0	0	0	0
ENSG00000169914.5	OTUD3	198.416	138.472	75.4025	132.827	291.967	238.348
ENSG00000188784.4	PLA2G2E	0	0	0	0.916047	0	0
ENSG00000242688.3	RN7SL304P	0	0	0	0	0	0
ENSG00000188257.10	PLA2G2A	0	0	0	0	0	0
ENSG00000127472.10	PLA2G5	0	0	0	0	0	0
ENSG00000117215.14	PLA2G2D	0	0	0	0	0	0
ENSG00000158786.4	PLA2G2F	0	0	0	0	0	0
ENSG00000227066.1	RP3-340N1.2	0	0	0	0	0	0
ENSG00000187980.6	PLA2G2C	0	0	0	0	0	0
ENSG00000225986.1	UBXN10-AS1	0	0	0	0	0	0
ENSG00000162543.5	UBXN10	0	0	0.979253	0	0	0
ENSG00000228105.1	RP3-340N1.6	0	0	0	0	0	0
ENSG00000158816.15	VWA5B1	0	0	0	0	1.58678	0
ENSG00000226664.1	RP4-745E8.2	0	0	0	0	0	0
ENSG00000236963.6	LINC01141	1.34977	0	0	0	0	0
ENSG00000226487.1	RP4-749H3.2	0	0	0	0	0	0
ENSG00000162545.5	CAMK2N1	44.5423	49.2091	98.9045	104.429	44.4297	66.8633
ENSG00000090432.6	MUL1	179.519	192.259	223.27	185.041	190.413	213.963
ENSG00000215520.3	RPS4XP4	0	0	0	0	0	0
ENSG00000183114.7	FAM43B	12.1479	8.01079	0	0	6.3471	3.14651
ENSG00000158825.5	CDA	414.379	487.514	8.81327	8.24442	523.636	690.659
ENSG00000158828.5	PINK1	153.873	108.718	45.0456	34.8098	195.173	191.937
ENSG00000273695.1	MIR6084	0	0	0	0	0	0
ENSG00000117242.7	PINK1-AS	9.44837	13.7328	20.5643	12.8247	17.4545	12.586
ENSG00000244038.9	DDOST	1318.72	1379	1138.87	789.632	1190.08	1315.24
ENSG00000117245.12	KIF17	18.8967	16.0216	3.91701	0	22.2149	25.9587
ENSG00000235432.1	RP5-930J4.5	0	0	0	0	0	0.786627
ENSG00000189410.11	SH2D5	220.012	122.451	34.2738	45.8023	231.669	147.886
ENSG00000233069.1	RP5-930J4.2	0	0	0	0.916047	0	0
ENSG00000127483.17	HP1BP3	1278.23	1214.21	1516.86	1591.17	1539.17	1499.31
ENSG00000075151.20	EIF4G3	651.938	611.109	688.415	555.124	804.495	980.924
ENSG00000251914.1	RNU7-200P	0	0	0	0	0	0
ENSG00000221808.1	MIR1256	0	0	0	0	0	0
ENSG00000233072.1	RPS15AP6	0	0	0	0.916047	0	0.786627
ENSG00000236073.2	RP11-487E1.2	0	1.1444	0	3.66419	1.58678	0.786627
ENSG00000235112.1	HSPE1P27	0	0	0	0.916047	0	2.35988
ENSG00000117298.14	ECE1	475.118	642.007	1159.44	1156.05	653.751	914.847
ENSG00000236936.1	RP3-329E20.2	1.34977	0	0.979253	0	3.17355	0.786627
ENSG00000231105.1	RP5-1071N3.1	0	1.1444	0	0.916047	1.58678	0.786627
ENSG00000236216.5	PPP1R11P1	0	0	0	0	0	0
ENSG00000228823.1	RP11-293F5.8	0	0	0	0	0	0
ENSG00000236009.1	RP11-293F5.1	0	0	0	0	1.58678	0
ENSG00000227001.3	NBPF2P	2.69953	1.1444	9.79253	8.24442	6.3471	1.57325
ENSG00000187952.9	HS6ST1P1	0	0	0	0	0	0
ENSG00000186543.7	CROCCP5	0	0	0	0	0	0
ENSG00000142794.18	NBPF3	90.4344	93.8407	150.805	126.414	85.6859	80.236
ENSG00000176378.8	PFN1P10	0	0	0	0	0	0
ENSG00000162551.13	ALPL	0	0	5.87552	5.49628	4.76033	2.35988
ENSG00000233431.1	RP11-63N8.3	0	0	0	0	0	0
ENSG00000221781.1	AL359815.1	0	0	0	0	0	0
ENSG00000076864.19	RAP1GAP	0	0	1.95851	0.916047	0	1.57325
ENSG00000090686.15	USP48	456.221	444.027	769.693	704.44	564.892	583.677
ENSG00000281866.1	U7	0	0	0	0	0	0
ENSG00000231978.2	RP11-132G19.3	0	0	0	0.916047	0	0.786627
ENSG00000187942.11	LDLRAD2	0	0	0	1.83209	1.58678	0.786627
ENSG00000142798.17	HSPG2	26.9953	24.0324	117.51	139.239	79.3388	90.4621
ENSG00000232037.3	RP11-26H16.1	1.34977	0	0	0.916047	0	2.35988
ENSG00000219073.7	CELA3B	0	0	0	0.916047	0	1.57325
ENSG00000273610.1	RN7SL386P	0	0	0	0	0	0
ENSG00000201919.1	RNU6-1022P	0	0	0	0	0	0
ENSG00000142789.19	CELA3A	0	0	0	0	0	0
ENSG00000278124.1	RN7SL186P	0	0	0	0	0	0
ENSG00000201273.1	RNU6-776P	0	0	0	0	0	0
ENSG00000228397.2	RP1-224A6.3	5.39907	2.2888	0	0.916047	1.58678	3.14651
ENSG00000218510.6	LINC00339	39.1433	27.4656	44.0664	37.5579	41.2562	29.1052
ENSG00000070831.15	CDC42	3649.77	4228.55	4817.92	3921.6	3963.76	5520.55
ENSG00000230068.2	CDC42-IT1	1.34977	0	0	2.74814	0	0
ENSG00000271428.1	RP1-224A6.8	1.34977	0	0	3.66419	0	2.35988
ENSG00000271840.1	RP1-224A6.9	0	1.1444	0.979253	4.58023	1.58678	0
ENSG00000162552.14	WNT4	1.34977	2.2888	0	6.41233	4.76033	3.93314
ENSG00000266564.1	MIR4418	0	0	0	0	0	0
ENSG00000234397.3	RP11-415K20.1	0	1.1444	1.95851	0.916047	0	0
ENSG00000279625.1	RP11-415K20.2	0	0	0	0	0	0
ENSG00000184677.16	ZBTB40	275.353	214.002	244.813	251.913	296.727	377.581
ENSG00000237200.1	ZBTB40-IT1	2.69953	0	0	3.66419	7.93388	0.786627
ENSG00000070886.10	EPHA8	0	0	0	0	0	0
ENSG00000276835.1	AL158086.1	0	0	0	0	0	0
ENSG00000173372.16	C1QA	0	0	0	0	0	0
ENSG00000159189.11	C1QC	0	0	0	0	1.58678	0
ENSG00000173369.15	C1QB	1.34977	0	0	0	0	0
ENSG00000133216.16	EPHB2	280.752	351.33	12.7303	17.4049	322.115	447.591
ENSG00000265422.1	MIR4684	0	0	0	0	0	0
ENSG00000216157.2	AL611946.1	0	1.1444	0	0	0	0
ENSG00000225952.1	RP11-69E9.1	0	0	0	0	0	0
ENSG00000264014.1	MIR4253	0	0	0	0	0	0
ENSG00000215906.8	LACTBL1	0	0	0	0	0	0
ENSG00000227868.5	C1orf234	1.34977	0	0	0	0	0
ENSG00000004487.15	KDM1A	1299.83	1435.08	1189.79	974.674	1297.98	1420.65
ENSG00000240553.1	RP1-184J9.2	1.34977	0	2.93776	3.66419	0	3.93314
ENSG00000263793.1	MIR3115	0	0	0	0	0	0
ENSG00000266802.1	MIR4419A	0	0	0	0	0	0.786627
ENSG00000169641.13	LUZP1	593.898	623.697	787.319	802.457	625.189	849.557
ENSG00000229010.1	RP5-979D14.1	0	0	0	0	0	0.786627
ENSG00000206935.1	RNU6-514P	0	0	0	0.916047	1.58678	0
ENSG00000252578.1	RNU6-135P	0	0	0	1.83209	0	0.786627
ENSG00000179546.4	HTR1D	8.0986	13.7328	33.2946	14.6568	4.76033	9.43953
ENSG00000215381.3	RP5-1057J7.1	0	0	0	0	1.58678	0
ENSG00000261326.2	LINC01355	24.2958	26.3212	9.79253	47.6344	50.7768	35.3982
ENSG00000125944.18	HNRNPR	2293.25	2501.65	3766.21	2685.85	2584.86	2880.63
ENSG00000125945.14	ZNF436	161.972	113.295	215.436	247.333	163.438	183.284
ENSG00000249087.6	ZNF436-AS1	5.39907	3.43319	1.95851	9.16047	11.1074	5.50639
ENSG00000201405.1	Y_RNA	0	0	0	0	0	0
ENSG00000271420.1	RP5-1057J7.7	0	0	0	0	0	0
ENSG00000204219.9	TCEA3	206.514	300.977	94.0083	72.3677	147.57	84.9557
ENSG00000232482.2	RP4-654C18.1	0	0	0	0	0	0
ENSG00000088280.18	ASAP3	59.3898	54.9311	135.137	116.338	58.7107	78.6627
ENSG00000007968.6	E2F2	109.331	88.1187	98.9045	83.3603	96.7933	62.9302
ENSG00000280791.1	Metazoa_SRP	0	0	0	0	0	0
ENSG00000235052.1	RP1-150O5.3	0	0	0	0	0	0.786627
ENSG00000117318.8	ID3	1.34977	3.43319	63.6514	46.7184	0	0
ENSG00000197880.8	MDS2	0	0	0.979253	0	0	0
ENSG00000229239.2	RP11-223J15.2	0	0	0	0	0	0
ENSG00000142676.12	RPL11	10953.4	12610.1	6140.89	6059.65	11239.1	12276.1
ENSG00000011007.12	TCEB3	1392.96	1443.09	840.199	842.763	1708.96	1636.97
ENSG00000236810.5	TCEB3-AS1	5.39907	3.43319	5.87552	6.41233	3.17355	4.71976
ENSG00000057757.9	PITHD1	422.477	369.641	291.817	287.639	445.884	482.202
ENSG00000011009.10	LYPLA2	170.071	147.627	142.971	132.827	196.76	227.335
ENSG00000117308.14	GALE	209.214	234.602	375.054	307.792	236.429	269.027
ENSG00000117305.14	HMGCL	64.7888	54.9311	130.241	78.78	60.2975	70.7965
ENSG00000179163.11	FUCA1	70.1879	68.6639	366.241	232.676	66.6446	84.1691
ENSG00000188822.7	CNR2	0	0	0	0	0	0
ENSG00000229106.1	BTBD6P1	0	0	1.95851	0	0	0
ENSG00000232557.3	RP11-4M23.3	0	0	0	0	0	0
ENSG00000264926.1	MIR378F	0	0	0	0	0	0
ENSG00000230228.2	RP11-4M23.4	2.69953	4.57759	8.81327	8.24442	3.17355	9.43953
ENSG00000189266.11	PNRC2	1654.81	1643.36	1558.97	1494.99	1821.62	1729.01
ENSG00000188529.14	SRSF10	2012.5	2269.34	2182.75	2009.81	2196.1	1961.06
ENSG00000215905.4	RP11-4M23.7	0	0	0	0	0	0
ENSG00000225315.2	RP11-293P20.2	0	0	0	0	0	0
ENSG00000142661.18	MYOM3	2.69953	0	0	0	0	0
ENSG00000230703.1	RP11-293P20.4	0	0	0	0	0	0
ENSG00000142677.3	IL22RA1	5.39907	5.72199	0.979253	2.74814	3.17355	3.14651
ENSG00000185436.11	IFNLR1	22.946	21.7436	50.9211	46.7184	33.3223	33.825
ENSG00000230023.2	RP11-10N16.2	0	0	0	0	0	0
ENSG00000221032.3	AL590683.1	0	0	0	0	0	0
ENSG00000266511.1	AL590683.2	0	0	0	0	0	0
ENSG00000232298.2	RP11-10N16.3	0	0	0	0	0	0
ENSG00000158055.15	GRHL3	2.69953	0	1.95851	0.916047	1.58678	1.57325
ENSG00000001460.17	STPG1	78.2865	61.7975	99.8838	115.422	69.8181	70.7965
ENSG00000001461.16	NIPAL3	248.357	208.28	377.992	302.295	314.181	368.142
ENSG00000117602.11	RCAN3	109.331	76.6747	223.27	234.508	115.835	92.0354
ENSG00000264443.1	RP4-594I10.3	0	0	0	0	0	0
ENSG00000184454.6	NCMAP	0	0	0	0	0	0.786627
ENSG00000227312.2	RP11-496D1.2	0	0	0	0	0	0
ENSG00000239106.1	Y_RNA	0	0	0	0	0	0
ENSG00000133226.16	SRRM1	437.325	473.781	558.174	592.682	626.776	670.993
ENSG00000169504.14	CLIC4	1951.76	2293.37	5303.63	3618.39	2524.56	3353.39
ENSG00000238482.1	RNU6-1208P	0	0	0	0	0	0.786627
ENSG00000020633.18	RUNX3	94.4837	132.75	194.871	171.301	142.81	275.32
ENSG00000278034.1	MIR6731	0	0	0	0	0	0
ENSG00000229162.1	RP11-84D1.1	0	0	6.85477	3.66419	0	1.57325
ENSG00000261025.1	RP11-84D1.2	0	1.1444	9.79253	8.24442	0	0
ENSG00000264371.1	MIR4425	0	0	0	0	0	0
ENSG00000233755.1	RP4-799D16.1	0	0	0	0	0	0.786627
ENSG00000233419.3	RP4-781L3.1	0	0	0	0	0	0
ENSG00000231953.2	RP4-706G24.1	0	0	0	0	0	0
ENSG00000117614.9	SYF2	735.623	831.978	420.099	415.885	840.991	792.92
ENSG00000117616.17	RSRP1	183.568	139.617	130.241	188.706	261.818	276.893
ENSG00000272432.1	RP3-465N24.6	0	0	0.979253	0.916047	1.58678	0.786627
ENSG00000261349.1	RP3-465N24.5	2.69953	1.1444	0	2.74814	3.17355	0.786627
ENSG00000187010.18	RHD	2.69953	0	0	1.83209	1.58678	2.35988
ENSG00000224183.1	SDHDP6	5.39907	4.57759	0	3.66419	3.17355	1.57325
ENSG00000259984.1	RP11-335G20.7	0	0	0.979253	0.916047	0	0.786627
ENSG00000183726.10	TMEM50A	757.219	717.538	1183.92	933.452	779.107	893.609
ENSG00000188672.16	RHCE	1.34977	0	1.95851	3.66419	4.76033	1.57325
ENSG00000238084.4	RP3-469D22.1	2.69953	3.43319	0.979253	0	1.58678	1.57325
ENSG00000204178.9	TMEM57	226.761	268.934	242.855	210.691	225.322	258.8
ENSG00000157978.11	LDLRAP1	78.2865	68.6639	163.535	169.469	106.314	93.6086
ENSG00000225643.1	RP11-70P17.1	0	0	1.95851	0	0	0.786627
ENSG00000117643.14	MAN1C1	12.1479	10.2996	29.3776	12.8247	11.1074	7.07965
ENSG00000233478.1	RP1-187B23.1	0	0	0	0	0	0
ENSG00000162430.16	SEPN1	225.411	288.388	309.444	373.747	209.454	266.667
ENSG00000255054.3	RP1-317E23.6	0	0	0	0	0	0
ENSG00000228172.5	RP1-317E23.3	2.69953	1.1444	0.979253	3.66419	4.76033	3.14651
ENSG00000117640.17	MTFR1L	202.465	203.703	194.871	228.096	234.843	223.402
ENSG00000272478.1	RP1-317E23.7	0	0	0	0	0	0
ENSG00000127423.10	AUNIP	167.371	141.905	147.867	207.027	206.281	222.616
ENSG00000236528.1	RP1-125I3.2	1.34977	2.2888	0.979253	0	1.58678	3.14651
ENSG00000182749.5	PAQR7	139.026	131.606	103.801	94.3528	157.091	191.15
ENSG00000207302.1	Y_RNA	0	0	0	0	0	0
ENSG00000117632.20	STMN1	7550.6	9000.69	7008.51	6702.72	8781.21	9730.58
ENSG00000229786.1	SNRPFP2	0	0	0	0.916047	0	0
ENSG00000223624.1	RP1-125I3.4	0	0	0	0	1.58678	0
ENSG00000264021.1	MIR3917	0	0	0	0	0	0
ENSG00000266763.1	AL033528.1	0	0	0	0	0	0
ENSG00000158006.13	PAFAH2	149.824	109.862	196.83	160.308	119.008	162.832
ENSG00000207237.1	RNU6-110P	0	0	0	0	0	0
ENSG00000252190.1	SCARNA17	0	0	0	0	0	0
ENSG00000252691.1	SCARNA18	0	0	0	0	0	0
ENSG00000158008.9	EXTL1	4.0493	3.43319	223.27	200.614	4.76033	3.14651
ENSG00000158014.14	SLC30A2	0	0	5.87552	5.49628	3.17355	1.57325
ENSG00000158022.6	TRIM63	0	0	0	0	0	0
ENSG00000265320.1	AL391650.1	0	0	0	0	0	0
ENSG00000175087.9	PDIK1L	105.282	137.328	70.5062	85.1924	93.6197	129.007
ENSG00000197245.5	FAM110D	0	0	0	0	0	1.57325
ENSG00000282872.1	RP11-96L14.8	0	0	0	0	0	0
ENSG00000236782.6	RP11-96L14.7	1.34977	0	0	0	0	0.786627
ENSG00000142684.7	ZNF593	4.0493	0	0	5.49628	0	4.71976
ENSG00000142675.17	CNKSR1	1.34977	1.1444	1.95851	3.66419	0	2.35988
ENSG00000188782.7	CATSPER4	0	0	0	0	0	0
ENSG00000236155.6	RP11-231P20.2	0	0	1.95851	0	0	0
ENSG00000278572.1	RP11-231P20.6	0	0	0	0	0	0
ENSG00000130695.13	CEP85	334.742	347.897	613.991	676.959	404.628	373.648
ENSG00000270733.1	RP11-231P20.5	1.34977	0	0	3.66419	1.58678	0.786627
ENSG00000142669.13	SH3BGRL3	274.003	448.604	508.232	523.063	409.388	715.044
ENSG00000158062.20	UBXN11	21.5963	19.4548	28.3983	62.2912	49.19	36.9715
ENSG00000169442.8	CD52	0	0	0	0	0	0
ENSG00000176092.13	AIM1L	2.69953	0	3.91701	2.74814	3.17355	3.14651
ENSG00000225854.2	RP11-569G9.7	0	0	0	0	0	0
ENSG00000176083.17	ZNF683	0	0	0.979253	0	0	0
ENSG00000131914.10	LIN28A	0	3.43319	2.93776	3.66419	1.58678	5.50639
ENSG00000117682.16	DHDDS	195.716	195.692	225.228	250.081	226.909	228.909
ENSG00000223583.1	RP3-476K8.4	1.34977	0	0	1.83209	4.76033	2.35988
ENSG00000225891.1	RP3-476K8.3	1.34977	0	2.93776	4.58023	0	2.35988
ENSG00000198830.10	HMGN2	3917.02	5445.05	4654.39	5206.81	4501.68	4601.77
ENSG00000224129.1	DPPA2P2	0	0	0	0	0	0
ENSG00000117676.13	RPS6KA1	202.465	214.002	507.253	408.557	266.578	334.317
ENSG00000238705.1	MIR1976	0	0	0	0	0	0
ENSG00000243905.3	RN7SL679P	0	0	0	0	0	0
ENSG00000252802.1	Y_RNA	0	0	0	0	0	0
ENSG00000252429.2	RNU7-29P	0	0	0	0	0	0
ENSG00000229247.2	RP11-492M19.3	0	0	0	0	0	0
ENSG00000238316.1	snoU13	0	0	0	0	0	0
ENSG00000235069.2	RP4-785J1.1	0	0	0	0	0	0
ENSG00000260063.1	RP5-968P14.2	14.8474	13.7328	10.7718	12.8247	11.1074	18.8791
ENSG00000117713.17	ARID1A	183.568	185.393	266.357	297.715	344.33	354.769
ENSG00000060642.10	PIGV	76.9367	68.6639	198.788	136.491	77.752	73.943
ENSG00000241188.3	RN7SL165P	0	0	0	0	0	0
ENSG00000204160.11	ZDHHC18	139.026	112.151	134.158	160.308	172.958	153.392
ENSG00000175793.11	SFN	8.0986	5.72199	0	1.83209	3.17355	3.93314
ENSG00000226698.1	RP1-50O24.6	0	0	0	0	0	0
ENSG00000142751.14	GPN2	229.46	211.714	186.058	176.797	264.991	252.507
ENSG00000198746.12	GPATCH3	76.9367	65.2307	85.195	64.1233	65.0578	63.7168
ENSG00000090273.13	NUDC	1253.93	1579.27	814.738	927.04	1445.55	1624.39
ENSG00000131910.4	NR0B2	1.34977	0	0	0	0	0.786627
ENSG00000175707.8	KDF1	0	0	0	0.916047	0	0
ENSG00000172746.6	RPL12P13	4.0493	0	0	0	1.58678	0.786627
ENSG00000224064.1	RP11-344H11.5	0	1.1444	0	0	0	0.786627
ENSG00000225294.1	OSTCP2	2.69953	5.72199	2.93776	0.916047	4.76033	1.57325
ENSG00000253368.3	TRNP1	128.228	107.573	285.942	283.975	160.264	191.937
ENSG00000158246.7	FAM46B	62.0893	37.7651	83.2365	98.017	79.3388	116.421
ENSG00000280403.1	AL137860.1	0	0	0	0.916047	0	0
ENSG00000090020.10	SLC9A1	74.2372	89.2631	82.2572	84.2763	107.901	154.966
ENSG00000229985.2	RP11-40H20.5	0	1.1444	0	0	0	0
ENSG00000214973.3	CHCHD3P3	1.34977	5.72199	1.95851	2.74814	3.17355	0.786627
ENSG00000225159.1	NPM1P39	76.9367	74.3859	20.5643	27.4814	65.0578	59.7837
ENSG00000225990.2	SNRPEP7	1.34977	0	0	0.916047	1.58678	0.786627
ENSG00000224311.1	RP11-40H20.4	0	0	0	0	0	0
ENSG00000142784.15	WDTC1	129.578	84.6855	134.158	109.01	160.264	167.552
ENSG00000252098.1	Y_RNA	0	0	0	0	0	0
ENSG00000243659.1	RP11-4K3__A.3	0	0	1.95851	0	0	0
ENSG00000186501.14	TMEM222	66.1386	57.2199	69.5269	99.8491	99.9668	96.7551
ENSG00000206888.1	RNU6-48P	0	0	0	0	1.58678	0.786627
ENSG00000241547.1	ACTG1P20	0	4.57759	0.979253	0	1.58678	4.71976
ENSG00000281023.1	FO393419.1	0	0	0	0	0	0
ENSG00000142765.17	SYTL1	0	1.1444	2.93776	5.49628	4.76033	1.57325
ENSG00000142733.14	MAP3K6	52.6409	45.7759	98.9045	122.75	79.3388	92.0354
ENSG00000142748.12	FCN3	0	0	0.979253	0.916047	0	0
ENSG00000174950.10	CD164L2	0	0	0	0	0	0
ENSG00000231207.1	RP1-144C9.2	0	0	0	0	0	0
ENSG00000181773.6	GPR3	75.587	90.4075	54.8382	52.2147	82.5123	87.3156
ENSG00000158195.10	WASF2	228.111	230.024	301.61	381.076	277.686	380.728
ENSG00000241169.1	RP4-752I6.1	0	0	0	0.916047	1.58678	0
ENSG00000237429.1	RP1-159A19.4	0	0	0	0	1.58678	0
ENSG00000126705.13	AHDC1	28.3451	48.0647	50.9211	81.5282	63.471	77.8761
ENSG00000000938.12	FGR	0	0	0	0	0	0
ENSG00000235912.1	RP1-159A19.3	0	2.2888	6.85477	5.49628	4.76033	0
ENSG00000233975.1	RP11-288L9.1	0	0	0	0	0	0
ENSG00000126709.14	IFI6	220.012	156.783	785.361	795.129	253.884	361.062
ENSG00000225886.3	RP11-288L9.4	0	0	1.95851	2.74814	0	0.786627
ENSG00000206767.1	RNU6-949P	0	0	0	0	0	0
ENSG00000226662.2	CHMP1AP1	0	0	0	0	0	0
ENSG00000207095.1	RNU6-424P	0	0	0	0	0	0
ENSG00000009780.15	FAM76A	137.676	153.349	333.925	283.975	139.636	136.087
ENSG00000231344.1	RP3-426I6.2	2.69953	2.2888	1.95851	0.916047	1.58678	1.57325
ENSG00000230833.1	RPEP3	0	0	0	0	0	0
ENSG00000117758.13	STX12	398.181	509.257	582.655	451.611	425.256	470.403
ENSG00000269971.1	RP3-426I6.5	0	0	1.95851	1.83209	3.17355	0.786627
ENSG00000276889.1	AL020997.1	0	0	0.979253	0	0	0.786627
ENSG00000270031.1	RP3-426I6.6	1.34977	1.1444	2.93776	1.83209	0	1.57325
ENSG00000223062.1	RNU6-1245P	0	0	0	0	0	0
ENSG00000117751.17	PPP1R8	699.179	736.992	717.792	583.522	661.685	728.417
ENSG00000252947.1	SCARNA1	1.34977	10.2996	5.87552	7.32838	6.3471	7.86627
ENSG00000278868.1	AL109927.1	0	0	0	0	0	0
ENSG00000130775.15	THEMIS2	41.8428	38.9095	35.2531	18.3209	36.4958	30.6785
ENSG00000117748.9	RPA2	851.703	1071.16	850.971	603.675	826.71	965.978
ENSG00000130768.14	SMPDL3B	2.69953	3.43319	0	0	3.17355	3.93314
ENSG00000227050.1	RP11-460I13.2	0	0	0	0	0	0
ENSG00000158156.7	XKR8	36.4437	33.1876	0	0	23.8016	43.2645
ENSG00000158161.15	EYA3	464.32	419.994	261.46	278.478	542.677	668.633
ENSG00000238231.2	RP11-460I13.6	0	1.1444	0	0.916047	1.58678	0
ENSG00000281570.1	Metazoa_SRP	0	0	0	0.916047	0	0
ENSG00000240750.3	RN7SL559P	0	1.1444	0	1.83209	0	0.786627
ENSG00000280526.1	AL137792.1	0	0	0	0	0	0
ENSG00000228589.3	SPCS2P4	22.946	22.888	18.6058	22.9012	22.2149	26.7453
ENSG00000228943.1	RP5-1053E7.2	0	0	0	0	0	0
ENSG00000214812.3	RP5-1053E7.3	0	0	0	0	0	0
ENSG00000253005.1	RNU6-176P	0	0	0	0	0	0
ENSG00000169403.11	PTAFR	1.34977	0	1.95851	2.74814	1.58678	0.786627
ENSG00000126698.10	DNAJC8	2432.28	2721.38	2659.65	2101.41	2630.87	2757.13
ENSG00000130770.17	ATPIF1	506.163	684.35	496.481	450.695	628.363	770.108
ENSG00000270605.1	RP5-1092A3.4	5.39907	1.1444	0	1.83209	4.76033	2.35988
ENSG00000271398.1	RP5-1092A3.5	1.34977	0	0	0	0	0.786627
ENSG00000130766.4	SESN2	36.4437	32.0432	73.444	99.8491	26.9752	35.3982
ENSG00000130772.13	MED18	58.04	113.295	145.909	125.498	103.14	136.873
ENSG00000204138.12	PHACTR4	255.106	276.944	236.979	317.868	350.677	435.005
ENSG00000206779.1	Y_RNA	0	0	0	1.83209	1.58678	0
ENSG00000229820.2	RP1-308E4.1	0	0	0	4.58023	1.58678	1.57325
ENSG00000221216.1	RNU6ATAC27P	0	3.43319	0	6.41233	1.58678	0.786627
ENSG00000180198.15	RCC1	1121.66	1330.94	868.597	910.551	1196.43	1464.7
ENSG00000242125.3	SNHG3	1301.18	820.534	300.631	535.887	2227.83	1404.13
ENSG00000274266.1	SNORA73A	0	0	0	0	0	0
ENSG00000200087.1	SNORA73B	79.6363	186.537	167.452	237.256	80.9255	178.564
ENSG00000231468.2	PRDX3P2	1.34977	0	0	3.66419	1.58678	3.14651
ENSG00000279443.1	RP4-669K10.8	2.69953	3.43319	5.87552	3.66419	4.76033	7.07965
ENSG00000180098.9	TRNAU1AP	152.524	183.104	317.278	307.792	182.479	156.539
ENSG00000197989.13	SNHG12	251.057	175.093	128.282	212.523	374.479	295.772
ENSG00000221539.1	SNORD99	8.0986	16.0216	13.7095	8.24442	25.3884	18.8791
ENSG00000278274.1	SNORA61	0	0	0	0	0	0
ENSG00000273544.1	SNORA44	0	0	0	0	0	0
ENSG00000280498.1	SNORA16A	0	0	0	0	0	0
ENSG00000274582.1	SNORA16A	0	0	0	0	0	0
ENSG00000120656.11	TAF12	144.425	146.483	228.166	241.836	190.413	229.695
ENSG00000188060.6	RAB42	2.69953	2.2888	0.979253	0.916047	4.76033	14.1593
ENSG00000229388.1	RP11-442N24__B.1	14.8474	18.3104	11.751	10.0765	17.4545	21.2389
ENSG00000270103.3	RNU11	0	0	0	0	0	0
ENSG00000274978.1	RNU11	0	0	0.979253	0	0	0
ENSG00000162419.12	GMEB1	214.613	156.783	235.021	218.019	187.239	216.322
ENSG00000252777.1	SCARNA24	0	0	0	0	0	0
ENSG00000198492.14	YTHDF2	850.353	825.111	811.8	746.578	955.239	1007.67
ENSG00000116329.10	OPRD1	1.34977	0	314.34	338.021	0	0
ENSG00000233427.1	RP1-212P9.3	0	0	0.979253	1.83209	0	0
ENSG00000199756.1	Y_RNA	0	0	0	0	0	0
ENSG00000159023.18	EPB41	327.993	307.843	237.958	242.752	274.512	287.906
ENSG00000225616.2	RP4-604A21.1	148.474	175.093	32.3153	47.6344	125.355	132.153
ENSG00000206704.1	Y_RNA	0	0	0	0	0	0
ENSG00000277958.1	Metazoa_SRP	0	0	0	0	0	0
ENSG00000253304.1	TMEM200B	53.9907	42.3427	70.5062	54.9628	38.0826	37.7581
ENSG00000225750.1	RP11-242O24.3	0	1.1444	0	3.66419	0	0
ENSG00000116350.16	SRSF4	634.391	671.762	940.083	1012.23	840.991	903.048
ENSG00000277916.1	uc_338	0	0	0	0	0	0
ENSG00000116353.15	MECR	70.1879	76.6747	85.195	87.0245	71.4049	76.3028
ENSG00000237934.1	RP11-467D18.2	1.34977	2.2888	0	0	1.58678	3.14651
ENSG00000060656.19	PTPRU	1.34977	2.2888	9.79253	4.58023	3.17355	3.14651
ENSG00000221550.2	AL645859.1	0	0	0	0	0	0
ENSG00000230523.1	RP3-437I16.1	0	0	0	0	0	0
ENSG00000266678.1	AL139151.1	0	0	0	0	0	0
ENSG00000225011.4	RP11-810H18.1	0	0	0	0.916047	0	0
ENSG00000221126.1	AC092265.1	0	0	0	0	0	0
ENSG00000228176.1	RP4-656G21.1	0	1.1444	0.979253	1.83209	3.17355	0.786627
ENSG00000222787.1	AL645944.1	0	0	0	0	0	0
ENSG00000270927.1	RP11-179G8.1	0	0	0	0	0	0
ENSG00000233399.2	RP11-111I12.1	0	0	0	0	0	0
ENSG00000233372.1	RP5-893G23.1	0	0	0	0	0	0
ENSG00000231251.1	RP3-357I16.1	0	0	0	0	0	0
ENSG00000236335.1	RP4-591L5.1	1.34977	0	0	0	0	0
ENSG00000231949.1	RP4-591L5.2	0	0	0	0	0	0
ENSG00000162510.5	MATN1	0	1.1444	0	0.916047	3.17355	3.14651
ENSG00000186056.9	MATN1-AS1	2.69953	0	2.93776	10.0765	0	7.86627
ENSG00000162511.7	LAPTM5	13.4977	81.2523	16.6473	13.7407	23.8016	119.567
ENSG00000264773.1	MIR4420	0	0	0	0	0	0
ENSG00000280823.1	Metazoa_SRP	0	0	0	0	0	0
ENSG00000229607.1	RP5-1125N11.1	0	0	1.95851	0.916047	0	0
ENSG00000223382.4	RP5-1125N11.2	2.69953	1.1444	36.2324	28.3975	3.17355	0.786627
ENSG00000222784.1	RN7SKP91	0	0	0	0	0	0
ENSG00000235143.1	RP1-65J11.5	0	0	0	0.916047	0	0
ENSG00000162512.15	SDC3	8.0986	14.8772	1140.83	858.336	4.76033	30.6785
ENSG00000266210.2	RN7SL371P	0	0	0	0	0	0
ENSG00000134644.15	PUM1	650.588	542.445	853.908	764.899	833.057	890.462
ENSG00000237329.2	RP11-201O14.1	4.0493	1.1444	0.979253	1.83209	3.17355	1.57325
ENSG00000232768.1	RP11-201O14.2	0	0	0.979253	4.58023	1.58678	0.786627
ENSG00000215900.4	SEPW1P	0	0	0	0	0	0
ENSG00000225142.2	RP11-490K7.1	0	0	0	0	0	0
ENSG00000084628.9	NKAIN1	0	0	0	0.916047	0	0
ENSG00000060688.12	SNRNP40	1070.37	1297.75	1172.17	968.262	1063.14	1266.47
ENSG00000229447.2	RP11-490K7.4	1.34977	0	0.979253	0.916047	1.58678	3.93314
ENSG00000121766.14	ZCCHC17	772.067	779.335	1313.18	887.649	758.478	799.213
ENSG00000229044.1	RP11-266K22.2	0	1.1444	0	0.916047	0	0
ENSG00000121769.7	FABP3	64.7888	61.7975	32.3153	35.7258	96.7933	112.488
ENSG00000168528.11	SERINC2	60.7395	53.7867	45.0456	56.7949	201.52	260.374
ENSG00000215899.3	RP11-439L8.2	0	0	1.95851	0	0	0
ENSG00000206981.1	RNU6-40P	0	0	0	0	0	0
ENSG00000260386.5	LINC01225	0	0	0	0	0	0
ENSG00000265961.1	Y_RNA	0	0	0	0	0	0
ENSG00000223907.1	LINC01226	0	1.1444	0	0	0	0
ENSG00000260636.1	RP11-439L8.5	0	0	0	0	0	0
ENSG00000229167.1	RP11-73M7.1	0	0	0	0	3.17355	0
ENSG00000142910.15	TINAGL1	198.416	311.276	129.261	86.1084	193.587	232.842
ENSG00000121764.11	HCRTR1	1.34977	0	0.979253	0	1.58678	0.786627
ENSG00000162517.12	PEF1	117.43	149.916	187.037	159.392	169.785	199.017
ENSG00000235790.7	RP11-73M7.6	1.34977	2.2888	3.91701	6.41233	1.58678	4.71976
ENSG00000264078.1	RP11-73M7.9	0	0	0	0	0	0
ENSG00000084636.17	COL16A1	8.0986	10.2996	26.4398	92.5207	22.2149	21.2389
ENSG00000121753.12	ADGRB2	64.7888	48.0647	183.12	194.202	44.4297	38.5447
ENSG00000266580.1	MIR4254	0	0	0	0	0	0
ENSG00000254545.1	RP11-84A19.3	0	0	0	0.916047	0	0.786627
ENSG00000134668.12	SPOCD1	56.6902	81.2523	93.029	84.2763	58.7107	49.5575
ENSG00000203620.2	RP11-84A19.2	0	0	0	0	0	0.786627
ENSG00000269967.1	RP11-84A19.4	0	1.1444	0.979253	1.83209	3.17355	1.57325
ENSG00000184007.17	PTP4A2	2923.6	3120.77	2520.6	2444.01	3597.22	4211.6
ENSG00000281319.1	AL136115.1	0	0	0	0	0	0
ENSG00000228634.1	RP4-534N18.2	2.69953	1.1444	0	4.58023	1.58678	1.57325
ENSG00000121774.17	KHDRBS1	711.327	814.812	891.12	916.963	787.04	919.567
ENSG00000203325.3	RP11-277A4.4	1.34977	0	0	0.916047	4.76033	3.14651
ENSG00000121775.17	TMEM39B	105.282	117.873	82.2572	69.6196	125.355	141.593
ENSG00000266203.1	MIR5585	0	0	0	0	0	0
ENSG00000276493.1	Metazoa_SRP	0	0	0	0	0	0.786627
ENSG00000025800.13	KPNA6	642.489	677.484	1138.87	1023.22	814.016	1130.38
ENSG00000250135.1	RP4-622L5.2	0	0	0	0	0	0
ENSG00000084652.15	TXLNA	958.335	885.764	1511.97	1302.62	1142.48	1156.34
ENSG00000160050.14	CCDC28B	43.1926	45.7759	32.3153	29.3135	34.9091	44.8378
ENSG00000224066.1	RP4-622L5.7	0	0	0.979253	1.83209	0	0
ENSG00000160051.11	IQCC	70.1879	52.6423	86.1742	88.8566	52.3636	33.0383
ENSG00000222046.2	DCDC2B	0	0	0.979253	6.41233	4.76033	3.14651
ENSG00000160055.19	TMEM234	32.3944	21.7436	41.1286	64.1233	31.7355	35.3982
ENSG00000084623.11	EIF3I	4788.97	4631.38	2343.35	1983.24	5285.55	5236.58
ENSG00000220785.7	MTMR9LP	9.44837	3.43319	8.81327	10.9926	7.93388	3.93314
ENSG00000183615.5	FAM167B	0	0	0	0	0	0
ENSG00000182866.16	LCK	0	0	0	0	0	0
ENSG00000277617.1	Metazoa_SRP	0	0	0	0	0	0
ENSG00000252450.1	Y_RNA	0	0	0	0	0	0
ENSG00000116478.11	HDAC1	1507.69	1593	1815.53	1369.49	1480.46	1750.25
ENSG00000175130.6	MARCKSL1	352.289	333.02	809.842	655.89	239.603	262.733
ENSG00000233775.1	RP4-811H24.9	0	0	0.979253	0.916047	0	0
ENSG00000162526.6	TSSK3	0	0	1.95851	2.74814	1.58678	3.14651
ENSG00000225828.1	FAM229A	5.39907	1.1444	3.91701	6.41233	0	2.35988
ENSG00000160058.18	BSDC1	232.16	211.714	281.046	296.799	266.578	242.281
ENSG00000224333.1	GAPDHP20	0	0	0	0	0	0
ENSG00000270850.1	RP11-395N6.4	0	0	0	0	0	0
ENSG00000229259.1	LRRC37A12P	0	0	0	0	0	0
ENSG00000263529.2	RN7SL122P	0	0	0	0	0	0
ENSG00000254553.1	RP1-27O5.3	0	0	0	0	0	0
ENSG00000273274.1	ZBTB8B	2.69953	3.43319	0	0	4.76033	5.50639
ENSG00000160062.14	ZBTB8A	45.8921	65.2307	126.324	125.498	46.0165	43.2645
ENSG00000176261.15	ZBTB8OS	790.964	767.891	690.373	594.514	963.172	840.118
ENSG00000200591.1	Y_RNA	1.34977	0	0	2.74814	0	1.57325
ENSG00000162521.18	RBBP4	1051.47	1480.85	2128.9	1637.89	1159.93	1533.92
ENSG00000162520.14	SYNC	0	0	239.917	271.15	1.58678	0.786627
ENSG00000224409.1	RP11-114B7.6	0	0	0	0.916047	0	0
ENSG00000162522.10	KIAA1522	49.9414	35.4763	84.2157	126.414	33.3223	21.2389
ENSG00000134684.10	YARS	901.645	904.075	848.033	834.519	937.784	1025.76
ENSG00000116497.17	S100PBP	359.038	349.041	562.091	466.268	355.438	408.26
ENSG00000160097.15	FNDC5	2.69953	1.1444	0	0.916047	1.58678	1.57325
ENSG00000121905.9	HPCA	0	1.1444	0	2.74814	0	0
ENSG00000121900.18	TMEM54	99.8828	100.707	141.012	122.75	76.1652	84.1691
ENSG00000116514.16	RNF19B	102.582	106.429	156.68	145.651	104.727	164.405
ENSG00000278966.2	RP5-1174N9.2	1.34977	0	0	0	0	0
ENSG00000217644.5	RP4-803A2.1	0	0	0	0	0	0
ENSG00000239670.1	RP4-803A2.2	0	0	0	0	0	0
ENSG00000236065.2	RP1-117O3.2	1.34977	1.1444	1.95851	1.83209	9.52065	3.14651
ENSG00000004455.16	AK2	1899.12	2618.38	1667.67	1266.89	2126.28	2563.62
ENSG00000276645.1	Metazoa_SRP	0	0	0	0	3.17355	1.57325
ENSG00000142920.16	AZIN2	9.44837	10.2996	8.81327	10.0765	9.52065	16.5192
ENSG00000278997.1	RP11-131M11.2	0	0	0	0	0	0
ENSG00000116525.13	TRIM62	9.44837	14.8772	22.5228	16.4888	9.52065	18.8791
ENSG00000279179.1	RP11-131M11.3	0	0	0	0.916047	1.58678	0.786627
ENSG00000160094.14	ZNF362	13.4977	14.8772	90.0912	84.2763	17.4545	25.9587
ENSG00000270115.1	RP11-415J8.7	0	0	0.979253	1.83209	0	0
ENSG00000184389.9	A3GALT2	0	0	0	0.916047	0	0
ENSG00000225313.5	RP11-415J8.3	24.2958	8.01079	16.6473	30.2295	25.3884	31.4651
ENSG00000134686.16	PHC2	859.802	732.415	833.344	731.922	1182.15	1213.77
ENSG00000266239.2	AL513327.1	1.34977	0	0.979253	0.916047	0	2.35988
ENSG00000222112.1	RN7SKP16	1.34977	0	2.93776	3.66419	6.3471	3.93314
ENSG00000233246.1	RP11-415J8.5	1.34977	2.2888	0.979253	1.83209	0	0.786627
ENSG00000221225.1	AL138837.1	0	0	0	0	0	0
ENSG00000234512.1	TLR12P	0	0	0	0	0	0
ENSG00000121903.14	ZSCAN20	22.946	33.1876	54.8382	69.6196	49.19	67.6499
ENSG00000235907.2	RP4-580O19.2	0	0	0.979253	0	0	0
ENSG00000121904.17	CSMD2	5.39907	4.57759	5.87552	3.66419	22.2149	25.9587
ENSG00000280715.1	AL161643.1	0	0	0	0	0	0
ENSG00000227000.2	HSPD1P14	0	0	0	0	0	0
ENSG00000176256.10	HMGB4	0	0	0	0	0	0
ENSG00000231163.5	CSMD2-AS1	0	1.1444	0	0	0	0
ENSG00000201148.1	RNA5SP42	0	0	0	0	0	0
ENSG00000142698.14	C1orf94	0	2.2888	0	0	4.76033	0.786627
ENSG00000221053.1	AC115286.1	0	0	0	0	0	0.786627
ENSG00000270241.1	RP4-657M3.2	0	0	0	0	0	0
ENSG00000207941.1	MIR552	0	0	0	0	0	0
ENSG00000163866.8	SMIM12	657.337	798.79	516.066	453.443	618.842	706.391
ENSG00000189280.3	GJB5	0	0	0	0	0	0
ENSG00000189433.5	GJB4	0	0	0	0	0	0
ENSG00000255811.1	RP1-34M23.5	0	0	0	0	0	0
ENSG00000216162.1	AL121988.1	0	0	0	0	0	0
ENSG00000188910.7	GJB3	0	0	0	0	0	0
ENSG00000187513.8	GJA4	1.34977	0	0	0	0	0
ENSG00000230163.1	RP5-997D16.2	21.5963	4.57759	4.89626	6.41233	15.8678	9.43953
ENSG00000116544.11	DLGAP3	1.34977	0	0	0	0	0
ENSG00000241014.1	RP11-244H3.1	2.69953	0	2.93776	4.58023	0	0.786627
ENSG00000271741.1	RP11-244H3.4	0	0	0	0	0	0
ENSG00000243749.1	ZMYM6NB	1.34977	8.01079	7.83402	4.58023	3.17355	3.14651
ENSG00000163867.16	ZMYM6	89.0846	50.3535	142.971	94.3528	74.5784	81.8092
ENSG00000233940.1	RPL12P45	0	0	0	0	0	0
ENSG00000197056.9	ZMYM1	523.71	573.344	560.133	492.833	566.479	623.009
ENSG00000228348.1	EFCAB14P1	1.34977	1.1444	1.95851	1.83209	1.58678	0.786627
ENSG00000116560.10	SFPQ	5860.69	6526.5	5853.97	5265.44	6094.8	7145.72
ENSG00000201868.1	Y_RNA	0	0	0	0	0	0
ENSG00000146463.11	ZMYM4	832.806	804.512	1110.47	1008.57	952.065	987.217
ENSG00000240374.3	RN7SL503P	0	0	0	0	0	0
ENSG00000201542.1	SNORA62	0	2.2888	0	0	0	0.786627
ENSG00000229994.1	RPL5P4	91.7842	120.162	61.6929	52.2147	107.901	103.048
ENSG00000227409.1	ZMYM4-AS1	0	2.2888	3.91701	0	1.58678	0.786627
ENSG00000278702.1	Metazoa_SRP	0	0	0	0	0	0
ENSG00000142687.17	KIAA0319L	336.092	386.807	508.232	512.07	417.322	491.642
ENSG00000236274.1	RP4-728D4.3	0	0	0	0.916047	0	0
ENSG00000020129.15	NCDN	116.08	105.285	127.303	133.743	122.182	139.233
ENSG00000239636.1	RP4-728D4.2	0	0	0	1.83209	0	0
ENSG00000116819.6	TFAP2E	1.34977	1.1444	15.668	10.9926	3.17355	1.57325
ENSG00000126067.11	PSMB2	777.466	853.721	1120.27	1185.36	964.759	994.297
ENSG00000142686.7	C1orf216	172.77	193.403	251.668	280.31	138.049	157.325
ENSG00000092853.13	CLSPN	697.83	553.889	998.838	1026.89	810.842	840.118
ENSG00000232335.1	RP11-435D7.3	0	0	0	0.916047	1.58678	0
ENSG00000134698.10	AGO4	156.573	147.627	110.656	135.575	122.182	133.727
ENSG00000092847.11	AGO1	542.606	394.817	260.481	267.486	595.041	572.665
ENSG00000271164.1	RP4-789D17.4	0	0	0	0	0	0
ENSG00000271914.1	RP4-789D17.5	0	0	0	0	0	0
ENSG00000126070.19	AGO3	238.909	278.089	170.39	179.545	344.33	375.221
ENSG00000271554.1	RP4-665N4.8	2.69953	3.43319	0	1.83209	4.76033	5.50639
ENSG00000232862.5	RP4-665N4.4	0	0	0	0.916047	0	0
ENSG00000092850.11	TEKT2	0	0	2.93776	0.916047	0	0
ENSG00000116863.10	ADPRHL2	228.111	228.88	150.805	145.651	253.884	264.307
ENSG00000171812.11	COL8A2	4.0493	0	0	3.66419	1.58678	3.14651
ENSG00000054116.11	TRAPPC3	518.311	687.783	695.269	684.287	655.338	776.401
ENSG00000116871.15	MAP7D1	668.135	814.812	1051.72	950.857	986.974	1130.38
ENSG00000264592.2	RN7SL131P	0	0	0	0	0	0
ENSG00000054118.13	THRAP3	1052.82	1095.19	1608.91	1221.09	1118.68	1448.97
ENSG00000231849.1	UBE2V2P4	0	0	0	2.74814	0	0.786627
ENSG00000278491.1	AL360074.1	0	0	0	0.916047	0	0
ENSG00000214193.9	SH3D21	12.1479	10.2996	14.6888	32.0616	25.3884	23.5988
ENSG00000142694.6	EVA1B	43.1926	65.2307	32.3153	37.5579	57.1239	90.4621
ENSG00000116883.8	RP11-268J15.5	1.34977	1.1444	0	7.32838	11.1074	3.93314
ENSG00000196182.10	STK40	287.5	248.334	124.365	128.247	353.851	387.807
ENSG00000181817.5	LSM10	137.676	203.703	96.946	177.713	174.545	226.549
ENSG00000222821.1	RNU4-27P	0	0	0	1.83209	0	0.786627
ENSG00000116885.18	OSCP1	9.44837	17.166	39.1701	35.7258	26.9752	22.8122
ENSG00000201448.1	SNORA63	1.34977	0	0	0	0	0
ENSG00000116898.11	MRPS15	1411.86	1964.93	1211.34	959.101	1401.12	1910.72
ENSG00000119535.17	CSF3R	0	0	0	0	0	0.786627
ENSG00000230214.1	FTLP18	0	0	0	0	0	0
ENSG00000281218.1	AL080286.1	0	0	0	0	0	0
ENSG00000234481.1	RP4-614N24.1	0	0	0	0	0	0
ENSG00000163873.9	GRIK3	0	1.1444	0.979253	1.83209	0	0.786627
ENSG00000280570.1	AC117945.1	0	0	0	0	0	0
ENSG00000264698.1	MIR4255	0	0	0	0	0	0
ENSG00000207328.1	RNU6-636P	0	0	0	0	0	0
ENSG00000223944.1	RP5-1180C18.1	0	0	0	0	0	0
ENSG00000252368.1	RNA5SP43	0	0	0	0	0	0
ENSG00000230451.2	RPS29P6	0	0	0	0	0	0
ENSG00000233621.1	LINC01137	9.44837	13.7328	11.751	4.58023	4.76033	9.43953
ENSG00000163874.8	ZC3H12A	22.946	35.4763	255.585	175.881	46.0165	40.118
ENSG00000278228.1	MIR6732	0	0	0	0	0	0
ENSG00000163875.15	MEAF6	626.292	614.542	431.85	395.732	666.446	689.085
ENSG00000263675.1	MIR5581	1.34977	1.1444	0	0	1.58678	0
ENSG00000163877.9	SNIP1	244.308	297.544	199.768	174.965	311.008	302.851
ENSG00000232273.1	FTH1P1	1.34977	0	0	4.58023	0	0.786627
ENSG00000237749.4	RP3-423B22.5	245.658	219.724	87.1535	211.607	222.149	296.558
ENSG00000163879.10	DNALI1	2.69953	5.72199	0.979253	8.24442	9.52065	6.29302
ENSG00000134697.12	GNL2	1013.68	950.995	948.896	827.19	1113.92	1085.55
ENSG00000169218.13	RSPO1	0	1.1444	0	0	0	0
ENSG00000116922.14	C1orf109	195.716	218.58	207.602	181.377	212.628	213.963
ENSG00000134690.10	CDCA8	548.006	526.423	555.236	688.867	618.842	611.996
ENSG00000183317.16	EPHA10	0	0	0	0	0	1.57325
ENSG00000200421.1	Y_RNA	0	0	0	0	0	0
ENSG00000214141.4	ACTN4P2	0	0	0	0	0	0
ENSG00000227416.2	RP11-109P14.2	0	0	0	0	0	0
ENSG00000185090.14	MANEAL	41.8428	37.7651	68.5477	54.0468	34.9091	38.5447
ENSG00000233728.1	RP11-109P14.9	0	0	0	0	0	0
ENSG00000196449.3	YRDC	249.707	276.944	283.004	213.439	272.925	276.106
ENSG00000197982.13	C1orf122	79.6363	100.707	99.8838	110.842	95.2065	114.848
ENSG00000188786.9	MTF1	136.326	99.5627	106.739	123.666	177.719	150.246
ENSG00000235673.1	RP11-109P14.8	0	2.2888	0	0.916047	1.58678	0
ENSG00000230955.1	RP11-109P14.10	0	0	0	0	0	0
ENSG00000204084.12	INPP5B	252.406	259.778	232.083	262.905	284.033	312.291
ENSG00000252448.1	SNORA63	1.34977	0	0	0.916047	1.58678	0.786627
ENSG00000222282.1	RNU6-584P	0	0	0	0	0	0
ENSG00000277168.1	Metazoa_SRP	0	0	0	0	0	0
ENSG00000183431.11	SF3A3	3026.18	3374.83	2468.7	1970.42	3370.31	3305.41
ENSG00000212541.1	RNU6-510P	0	0	0	0.916047	0	0.786627
ENSG00000183386.9	FHL3	36.4437	38.9095	43.0871	62.2912	36.4958	64.5034
ENSG00000183520.11	UTP11L	1457.75	1621.61	1003.73	804.289	1578.84	1659.78
ENSG00000185668.6	POU3F1	0	0	0	0	0	0.786627
ENSG00000224592.5	RP5-884C9.2	0	0	0	0	0	0
ENSG00000223589.2	RP5-884C9.3	0	0	0	0	0	0
ENSG00000265596.1	MIR3659	0	0	0	0	0	0
ENSG00000237290.1	LINC01343	0	0	0	0	0	0
ENSG00000275350.1	RP11-329N22.2	0	0	0	0	0	0
ENSG00000200796.1	RNU6-753P	0	0	0	0	0	0
ENSG00000238063.2	RP11-329N22.1	0	0	0	0	0	0
ENSG00000215895.4	RP11-334L9.1	8.0986	3.43319	4.89626	6.41233	4.76033	3.93314
ENSG00000116954.7	RRAGC	60.7395	72.0971	98.9045	69.6196	68.2313	87.3156
ENSG00000273637.1	RP5-864K19.7	0	0	0	0	0	0
ENSG00000228436.2	RP5-864K19.4	10.7981	13.7328	2.93776	2.74814	12.6942	21.2389
ENSG00000214114.8	MYCBP	170.071	181.959	286.921	230.844	177.719	195.084
ENSG00000274944.4	RP5-864K19.6	0	0	0	0	0	0
ENSG00000131233.9	GJA9	0	0	1.95851	0	1.58678	0
ENSG00000158315.10	RHBDL2	0	0	0	0	4.76033	0.786627
ENSG00000199963.1	RNU6-605P	0	0	0	0	0	0
ENSG00000207466.1	Y_RNA	0	0	0	0	0	0
ENSG00000235549.1	EIF1P2	0	0	0	0	0	0
ENSG00000174574.15	AKIRIN1	522.36	506.968	496.481	501.078	574.413	619.862
ENSG00000168653.10	NDUFS5	1525.24	1835.61	2670.42	2300.19	1888.26	1802.16
ENSG00000127603.23	MACF1	1904.52	1506.03	1409.14	2073.01	2326.21	2797.25
ENSG00000206654.1	RNU6-608P	0	0	0	0.916047	0	2.35988
ENSG00000222378.1	RNA5SP44	0	0	0	0	0	0.786627
ENSG00000270040.1	RP11-416A14.1	1.34977	0	0	0	0	0
ENSG00000226438.1	RP11-420K8.1	0	1.1444	1.95851	0.916047	0	0.786627
ENSG00000217897.2	HSPE1P8	5.39907	3.43319	1.95851	1.83209	0	3.14651
ENSG00000183682.7	BMP8A	0	1.1444	0	0	0	0.786627
ENSG00000237624.1	OXCT2P1	9.44837	10.2996	1.95851	0	9.52065	7.07965
ENSG00000182109.7	RP11-69E11.4	1.34977	3.43319	0.979253	5.49628	4.76033	3.14651
ENSG00000243970.1	PPIEL	4.0493	3.43319	0	2.74814	0	1.57325
ENSG00000090621.13	PABPC4	1124.36	991.049	1175.1	1346.59	1510.61	1684.96
ENSG00000228060.1	RP11-69E11.8	10.7981	2.2888	8.81327	17.4049	6.3471	14.9459
ENSG00000201457.1	SNORA55	6.74884	10.2996	6.85477	8.24442	11.1074	6.29302
ENSG00000163909.7	HEYL	1.34977	1.1444	0	0	1.58678	0.786627
ENSG00000225903.1	RP1-144F13.3	0	0	0	0	0	0
ENSG00000116981.3	NT5C1A	0	0	0	0	0	0
ENSG00000116983.12	HPCAL4	1.34977	4.57759	13.7095	8.24442	4.76033	1.57325
ENSG00000084072.16	PPIE	372.536	449.749	377.992	311.456	344.33	420.059
ENSG00000225333.6	RP1-144F13.4	14.8474	12.5884	4.89626	1.83209	15.8678	6.29302
ENSG00000252413.1	RNU7-121P	0	0	0	0	0	1.57325
ENSG00000116985.10	BMP8B	9.44837	19.4548	147.867	106.261	14.281	11.7994
ENSG00000198754.5	OXCT2	2.69953	4.57759	0	0	1.58678	3.93314
ENSG00000261798.1	RP1-118J21.25	2.69953	0	0	0.916047	0	0.786627
ENSG00000229213.1	RP1-118J21.24	0	0	0	0	0	0
ENSG00000043514.15	TRIT1	375.235	425.716	315.319	262.905	379.239	420.846
ENSG00000202222.1	Y_RNA	0	0	0	0.916047	3.17355	2.35988
ENSG00000116990.10	MYCL	2.69953	2.2888	21.5436	11.9086	1.58678	0
ENSG00000236546.1	RP1-118J21.5	0	0	0	0	0	0
ENSG00000207356.1	Y_RNA	0	0	0	0	0	0
ENSG00000168389.17	MFSD2A	106.632	120.162	141.992	144.735	147.57	102.262
ENSG00000228477.1	RP3-342P20.2	4.0493	0	1.95851	6.41233	6.3471	6.29302
ENSG00000131236.16	CAP1	4257.17	4140.43	6158.52	4545.42	4442.97	5172.86
ENSG00000131238.16	PPT1	1525.24	1901.99	1883.1	1361.25	1496.33	1702.26
ENSG00000226745.2	RP11-115D7.3	0	0	0	0	0	0
ENSG00000117000.8	RLF	575.001	516.124	730.523	643.065	599.801	733.137
ENSG00000207508.1	RNU6-1237P	0	1.1444	0	0.916047	0	0.786627
ENSG00000188800.5	TMCO2	0	0	1.95851	0.916047	0	0.786627
ENSG00000259943.1	RP1-39G22.7	49.9414	46.9203	32.3153	25.6493	74.5784	66.8633
ENSG00000084073.8	ZMPSTE24	1936.92	2533.7	2202.34	1876.98	2018.38	2692.62
ENSG00000231296.1	RP1-39G22.4	0	2.2888	0	3.66419	3.17355	0.786627
ENSG00000049089.13	COL9A2	1.34977	3.43319	1.95851	3.66419	3.17355	2.35988
ENSG00000227311.3	RP1-228H13.1	0	4.57759	0	0.916047	1.58678	1.57325
ENSG00000084070.11	SMAP2	345.54	331.876	244.813	235.424	333.223	331.957
ENSG00000213172.3	RP1-228H13.2	0	0	0	0	0	0
ENSG00000187801.14	ZFP69B	17.547	17.166	17.6265	16.4888	15.8678	14.9459
ENSG00000260920.2	RP1-228H13.5	2.69953	1.1444	2.93776	10.0765	7.93388	9.43953
ENSG00000279667.1	RP11-656D10.7	1.34977	0	1.95851	0	1.58678	0.786627
ENSG00000187815.9	ZFP69	122.829	124.739	54.8382	42.1382	157.091	129.793
ENSG00000238287.1	RP11-656D10.3	14.8474	9.15519	6.85477	2.74814	4.76033	7.07965
ENSG00000164002.11	EXO5	105.282	114.44	73.444	111.758	103.14	116.421
ENSG00000227278.1	RP11-656D10.5	0	0	0	0	0	0
ENSG00000238186.1	RP11-656D10.6	2.69953	2.2888	3.91701	7.32838	1.58678	3.93314
ENSG00000117010.15	ZNF684	89.0846	100.707	60.7137	57.711	136.463	128.22
ENSG00000236505.1	RP1-63P18.2	0	0	0	0	0	0
ENSG00000233910.1	GTF2F2P2	0	0	0	0	0	0
ENSG00000117016.9	RIMS3	4.0493	0	36.2324	43.0542	0	0
ENSG00000237899.1	RP4-739H11.3	0	0	0	1.83209	0	0
ENSG00000272145.1	NFYC-AS1	13.4977	12.5884	6.85477	11.9086	15.8678	18.0924
ENSG00000066136.19	NFYC	245.658	286.1	276.149	294.967	295.14	371.288
ENSG00000198974.2	MIR30E	1.34977	0	0	0	0	0
ENSG00000207962.1	MIR30C1	0	0	0	0	1.58678	0.786627
ENSG00000117013.14	KCNQ4	0	0	0	0	0	0
ENSG00000264582.2	RN7SL326P	0	0	0	0	0	0
ENSG00000179862.6	CITED4	32.3944	34.3319	1.95851	2.74814	34.9091	54.2773
ENSG00000229528.1	RP5-1066H13.4	1.34977	0	0	0	1.58678	0.786627
ENSG00000228940.1	RP11-348A7.1	0	0	0	0	0	0
ENSG00000273910.1	AL391730.1	0	0	0	0	0	0
ENSG00000233118.2	UBE2V1P8	0	0	0	0	0	0
ENSG00000171793.13	CTPS1	619.543	702.661	500.398	595.431	755.305	774.828
ENSG00000281712.1	AL391730.2	0	0	0	0	0	0
ENSG00000281207.1	SLFNL1-AS1	2.69953	2.2888	2.93776	14.6568	11.1074	3.93314
ENSG00000171790.15	SLFNL1	4.0493	0	0.979253	5.49628	4.76033	1.57325
ENSG00000010803.16	SCMH1	172.77	216.291	255.585	264.738	226.909	215.536
ENSG00000215893.3	RPL23AP17	0	0	0	0	0	0
ENSG00000235358.1	RP11-399E6.1	2.69953	0	0	0	3.17355	1.57325
ENSG00000213987.4	RP11-399E6.2	0	0	0	0	0	0
ENSG00000281479.1	AC093151.2	0	0	0	0	0	0
ENSG00000204060.5	FOXO6	0	3.43319	0	0	1.58678	1.57325
ENSG00000229901.1	RP11-399E6.4	0	0	0	0	0	0
ENSG00000252563.1	RNA5SP45	0	0	0	0	0	0
ENSG00000127129.9	EDN2	0	0	0	0	0	0
ENSG00000127124.13	HIVEP3	48.5916	83.5411	143.95	139.239	72.9917	83.3825
ENSG00000230881.1	RP11-486B10.3	0	0	0	0	0	0
ENSG00000230638.4	RP11-486B10.4	0	0	0.979253	0	0	0
ENSG00000264896.1	AL451006.1	0	0	0	0	0	0
ENSG00000227538.1	HNRNPFP1	0	0	0	0	0	0
ENSG00000228776.2	RP11-319C21.1	0	0	0	0	0	0
ENSG00000044012.3	GUCA2B	0	0	0	0	0	0
ENSG00000197273.3	GUCA2A	0	0	0	0	0	0
ENSG00000198815.8	FOXJ3	712.677	646.585	423.037	514.818	852.098	893.609
ENSG00000227527.2	RP11-223A3.1	0	0	0	0	0	0.786627
ENSG00000177181.14	RIMKLA	0	0	15.668	8.24442	0	0.786627
ENSG00000235002.1	RP11-157D18.2	0	0	0	0	0	0
ENSG00000066185.12	ZMYND12	2.69953	0	13.7095	8.24442	0	3.93314
ENSG00000127125.8	PPCS	170.071	197.981	333.925	269.318	242.777	224.189
ENSG00000186409.14	CCDC30	2.69953	2.2888	9.79253	14.6568	1.58678	12.586
ENSG00000230116.1	RP11-163G10.2	0	0	0	0	0	0
ENSG00000236876.3	TMSB4XP1	0	0	0	0	0	0
ENSG00000200254.1	RNU6-536P	0	0	0	0	0	0
ENSG00000236180.2	RP11-163G10.4	0	0	0	1.83209	0	0
ENSG00000171960.10	PPIH	736.973	825.111	553.278	460.772	679.14	866.077
ENSG00000234917.2	RP5-994D16.3	6.74884	3.43319	3.91701	4.58023	7.93388	4.71976
ENSG00000065978.17	YBX1	14603.1	12868.8	13399.1	10285.4	16711.9	14364.6
ENSG00000164007.10	CLDN19	0	0	0	0	0	0
ENSG00000117385.15	P3H1	302.348	341.031	519.983	436.038	349.091	369.715
ENSG00000164008.13	C1orf50	59.3898	59.5087	46.0249	52.2147	65.0578	65.2901
ENSG00000228452.1	RP5-994D16.9	4.0493	13.7328	9.79253	5.49628	9.52065	7.86627
ENSG00000274386.4	RP5-994D16.11	0	0	0	0	0	0
ENSG00000177868.11	SVBP	80.986	76.6747	58.7552	39.39	103.14	90.4621
ENSG00000164010.13	ERMAP	24.2958	25.1768	46.0249	51.2986	23.8016	24.3854
ENSG00000228192.7	RP11-342M1.3	5.39907	11.444	3.91701	2.74814	15.8678	10.2262
ENSG00000164011.17	ZNF691	114.73	97.2739	70.5062	63.2072	101.554	100.688
ENSG00000233708.1	RP11-342M1.7	0	0	0	0	0	0
ENSG00000237090.1	RP11-342M1.6	0	0	0.979253	0	0	0
ENSG00000225099.1	ATP6V1E1P1	1.34977	1.1444	0.979253	0	0	0.786627
ENSG00000117394.19	SLC2A1	762.619	845.71	1359.2	1364.91	945.718	1209.05
ENSG00000227533.5	SLC2A1-AS1	6.74884	0	8.81327	15.5728	4.76033	8.6529
ENSG00000207256.1	RNU6-880P	0	0	0	0.916047	0	0
ENSG00000277513.1	RP3-393B19.1	0	0	0	0	0	0
ENSG00000186973.10	FAM183A	0	0	0	0	0	0
ENSG00000117395.10	EBNA1BP2	3923.77	4764.13	1633.39	1291.63	4003.43	3737.27
ENSG00000243710.7	CFAP57	5.39907	9.15519	6.85477	4.58023	15.8678	11.7994
ENSG00000199240.1	RNA5SP46	0	0	0	0	0	0
ENSG00000179178.10	TMEM125	0	0	0	0	1.58678	0
ENSG00000253313.5	C1orf210	0	0	0	0	0	0
ENSG00000066056.13	TIE1	1031.22	1167.29	0	0	734.677	846.411
ENSG00000117400.14	MPL	0	0	0	0	1.58678	1.57325
ENSG00000234694.1	RP1-92O14.3	0	2.2888	0.979253	7.32838	1.58678	2.35988
ENSG00000117399.13	CDC20	1276.88	1296.6	1095.78	1276.05	1413.82	2083.78
ENSG00000066322.12	ELOVL1	489.966	448.604	716.813	655.89	615.669	582.891
ENSG00000277622.1	MIR6734	0	0	0	0	0	0
ENSG00000159479.16	MED8	512.912	478.358	262.44	244.585	476.033	533.333
ENSG00000229431.1	RP1-92O14.6	0	2.2888	1.95851	6.41233	4.76033	1.57325
ENSG00000198198.14	SZT2	195.716	149.916	180.182	349.014	307.834	235.202
ENSG00000229372.1	SZT2-AS1	0	0	0	1.83209	0	0
ENSG00000274975.1	MIR6735	0	0	0	0	0	0
ENSG00000178922.16	HYI	70.1879	59.5087	178.224	207.943	168.198	95.1819
ENSG00000229348.1	HYI-AS1	1.34977	0	0.979253	4.58023	0	0.786627
ENSG00000142949.16	PTPRF	1129.76	1115.79	1699	1845.83	1174.21	1404.92
ENSG00000066135.12	KDM4A	193.017	154.494	256.564	268.402	238.016	225.762
ENSG00000236200.5	KDM4A-AS1	21.5963	14.8772	31.3361	32.0616	34.9091	18.0924
ENSG00000126091.19	ST3GAL3	51.2912	65.2307	144.929	176.797	66.6446	95.9685
ENSG00000229444.1	RP11-184I16.4	2.69953	1.1444	0.979253	4.58023	3.17355	2.35988
ENSG00000233674.2	RP11-184I16.3	1.34977	0	0	4.58023	0	0
ENSG00000224751.2	SHMT1P1	1.34977	0	0	2.74814	1.58678	1.57325
ENSG00000117407.16	ARTN	8.0986	8.01079	0.979253	1.83209	22.2149	22.8122
ENSG00000237950.1	RP11-7O11.3	1.34977	0	0.979253	5.49628	1.58678	3.14651
ENSG00000117408.10	IPO13	160.622	136.183	218.373	191.454	192	200.59
ENSG00000132768.13	DPH2	279.402	311.276	152.763	164.888	318.942	357.915
ENSG00000117410.13	ATP6V0B	361.738	428.005	484.73	409.473	393.52	535.693
ENSG00000117411.16	B4GALT2	193.017	257.49	434.788	421.382	199.934	217.896
ENSG00000159214.12	CCDC24	20.2465	16.0216	21.5436	15.5728	19.0413	21.2389
ENSG00000196517.11	SLC6A9	2.69953	2.2888	24.4813	23.8172	6.3471	14.1593
ENSG00000230615.6	RP5-1198O20.4	0	1.1444	45.0456	60.4591	4.76033	10.2262
ENSG00000227163.2	RP5-1198O20.5	0	0	0	0.916047	1.58678	0
ENSG00000271647.1	KRT8P47	0	0	0	0	0	0
ENSG00000281534.1	AL139220.1	0	0	0	0	0	0
ENSG00000239560.3	RN7SL479P	0	0	0	0	0	0
ENSG00000171872.4	KLF17	0	0	2.93776	14.6568	0	1.57325
ENSG00000233514.1	RP11-570P14.1	22.946	12.5884	13.7095	21.0691	7.93388	14.1593
ENSG00000283039.1	KLF18	0	0	0	0	1.58678	0
ENSG00000226804.4	RP4-675G8.3	0	0	0	0	0	0
ENSG00000200171.1	Y_RNA	0	0	0	0	0	0
ENSG00000238037.1	OOSP1P1	0	0	0	0	0	0
ENSG00000227994.1	RP5-891H21.1	0	0	0	0	0	0
ENSG00000271329.1	RP5-891H21.5	0	0	0	0	0	0.786627
ENSG00000178028.13	DMAP1	112.031	106.429	90.0912	138.323	204.694	155.752
ENSG00000117419.14	ERI3	224.061	239.179	229.145	205.195	236.429	277.679
ENSG00000233602.1	ERI3-IT1	1.34977	2.2888	0	5.49628	0	2.35988
ENSG00000252146.1	AL390776.1	0	0	0	0	0	0
ENSG00000199385.1	RNU6-369P	0	0	0	0	0	0
ENSG00000187147.17	RNF220	373.886	268.934	302.589	229.012	284.033	302.851
ENSG00000263381.1	MIR5584	0	0	0	0	0	0
ENSG00000126106.13	TMEM53	20.2465	18.3104	30.3568	32.0616	22.2149	36.9715
ENSG00000198520.10	C1orf228	1.34977	0	0.979253	0	3.17355	0
ENSG00000199377.1	RNU5F-1	5.39907	4.57759	0.979253	1.83209	4.76033	3.93314
ENSG00000200169.1	RNU5D-1	6.74884	2.2888	4.89626	12.8247	11.1074	17.3058
ENSG00000142945.12	KIF2C	777.466	718.682	1510.01	1323.69	842.578	975.418
ENSG00000225721.5	RP11-269F19.2	5.39907	6.86639	3.91701	7.32838	1.58678	7.86627
ENSG00000142937.11	RPS8	6743.44	9512.24	6434.67	5352.46	7151.59	9668.44
ENSG00000264294.1	SNORD55	0	0	0	0	0	0
ENSG00000200913.1	SNORD46	5.39907	5.72199	1.95851	4.58023	1.58678	14.9459
ENSG00000202031.1	SNORD38A	0	0	0	0	1.58678	0
ENSG00000207421.1	SNORD38B	0	0	0	0	0	0
ENSG00000281859.1	SNORD38B	0	0	0	0	0	0
ENSG00000234093.3	RPS15AP11	5.39907	14.8772	5.87552	8.24442	19.0413	16.5192
ENSG00000142959.4	BEST4	1.34977	0	0	0	1.58678	2.35988
ENSG00000173846.12	PLK3	64.7888	56.0755	96.946	112.674	92.033	92.0354
ENSG00000188396.3	TCTEX1D4	0	1.1444	0	0	0	1.57325
ENSG00000222009.8	BTBD19	18.8967	13.7328	11.751	38.474	42.8429	24.3854
ENSG00000117425.13	PTCH2	8.0986	3.43319	10.7718	10.0765	7.93388	14.9459
ENSG00000202444.1	RNU5E-6P	0	0	0	0	0	0
ENSG00000226499.1	RP5-882O7.1	1.34977	1.1444	0.979253	0.916047	1.58678	0.786627
ENSG00000070785.16	EIF2B3	461.62	474.925	380.929	318.784	410.975	517.601
ENSG00000266294.1	AL136380.1	0	0	0	0	0	0
ENSG00000253039.1	RNA5SP47	0	0	0	0	0	0
ENSG00000229815.1	CCNB1IP1P1	0	0	0.979253	0	0	0
ENSG00000232369.1	RP5-882O7.4	0	0	0	0	1.58678	3.14651
ENSG00000268949.1	MRPS17P1	6.74884	4.57759	0	0.916047	3.17355	7.86627
ENSG00000126107.14	HECTD3	137.676	114.44	276.149	227.18	150.744	226.549
ENSG00000126088.12	UROD	1650.77	1693.71	1464.96	1155.14	1486.81	1516.62
ENSG00000162415.6	ZSWIM5	4.0493	9.15519	33.2946	43.0542	11.1074	7.07965
ENSG00000234315.1	OSTCP5	0	0	0.979253	1.83209	0	0
ENSG00000221707.2	AL592294.1	0	0	0	0	0	0
ENSG00000281912.1	LINC01144	0	0	0.979253	4.58023	3.17355	1.57325
ENSG00000186603.5	HPDL	29.6949	46.9203	9.79253	13.7407	44.4297	24.3854
ENSG00000132781.17	MUTYH	75.587	59.5087	95.9668	101.681	88.8594	88.8889
ENSG00000132773.11	TOE1	276.702	373.074	272.232	243.668	366.545	358.702
ENSG00000070759.16	TESK2	22.946	37.7651	28.3983	38.474	42.8429	30.6785
ENSG00000236872.1	RP11-291L19.1	0	0	0	0	0	0
ENSG00000280670.2	CCDC163P	13.4977	13.7328	9.79253	18.3209	28.562	21.2389
ENSG00000132763.14	MMACHC	217.313	226.591	182.141	196.95	263.405	252.507
ENSG00000117450.13	PRDX1	5451.71	5362.65	4210.79	3611.06	5958.34	5943.76
ENSG00000234379.1	HMGB1P48	0	0	0	0	0	0
ENSG00000117448.13	AKR1A1	437.325	500.102	405.411	298.631	498.247	548.279
ENSG00000281133.1	AL355480.3	0	0	0	0	0	0
ENSG00000280836.1	AL355480.1	0	0	0	0	1.58678	0
ENSG00000132780.16	NASP	1483.39	1567.83	1129.08	1374.99	1847.01	1646.41
ENSG00000281112.1	AL355480.2	0	0	0	0.916047	0	0.786627
ENSG00000281825.1	AL355480.4	1.34977	0	0	0	0	0
ENSG00000159588.14	CCDC17	5.39907	6.86639	3.91701	8.24442	11.1074	9.43953
ENSG00000159592.10	GPBP1L1	988.03	994.482	1022.34	922.459	1155.17	1246.8
ENSG00000225447.1	RPS15AP10	0	1.1444	0	2.74814	3.17355	1.57325
ENSG00000234329.1	RP11-767N6.2	5.39907	5.72199	1.95851	3.66419	0	5.50639
ENSG00000159596.6	TMEM69	244.308	280.378	212.498	198.782	260.231	263.52
ENSG00000197429.10	IPP	45.8921	53.7867	278.108	217.103	65.0578	57.4238
ENSG00000230896.1	RP11-767N6.7	2.69953	0	11.751	10.0765	9.52065	3.93314
ENSG00000236111.5	RP11-630I5.1	0	1.1444	0	0	0	0.786627
ENSG00000086015.20	MAST2	263.205	298.688	234.041	423.214	295.14	362.635
ENSG00000232467.2	TMA16P2	0	0	0.979253	1.83209	1.58678	0.786627
ENSG00000117461.14	PIK3R3	26.9953	12.5884	62.6722	76.0319	19.0413	51.1308
ENSG00000278139.1	PIK3R3	0	0	0	0	0	0
ENSG00000226957.1	RP4-533D7.4	1.34977	0	0	0	0	0
ENSG00000233114.2	RP4-533D7.3	0	0	0	0	0	0
ENSG00000227857.2	RP4-533D7.5	1.34977	0	1.95851	0	1.58678	0.786627
ENSG00000117472.9	TSPAN1	13.4977	14.8772	0	0.916047	12.6942	15.7325
ENSG00000250719.1	RP11-322N21.2	0	0	0	0	0	0
ENSG00000281129.1	AL672043.1	0	0	0	0	0	0
ENSG00000085998.13	POMGNT1	295.599	391.384	506.274	389.32	350.677	386.234
ENSG00000171357.5	LURAP1	8.0986	12.5884	7.83402	9.16047	0	13.3727
ENSG00000085999.11	RAD54L	94.4837	94.9851	120.448	109.926	111.074	103.835
ENSG00000132128.16	LRRC41	180.869	195.692	284.963	270.234	285.62	264.307
ENSG00000173660.11	UQCRH	6325.01	6749.66	3659.47	3504.8	7229.35	7484.76
ENSG00000117481.10	NSUN4	180.869	181.959	230.124	185.958	165.025	211.603
ENSG00000225779.1	RP4-603I14.3	0	0	0	0.916047	0	0.786627
ENSG00000117480.15	FAAH	0	1.1444	0	1.83209	0	0.786627
ENSG00000232022.7	FAAHP1	0	0	0	0	0	0
ENSG00000273854.1	AL137797.1	0	0	0	0	0	0
ENSG00000224863.2	LINC01398	1.34977	0	0	0	0	0
ENSG00000197587.10	DMBX1	0	0	16.6473	15.5728	0	0
ENSG00000282881.1	RP11-49P4.7	0	0	0	0	0	0
ENSG00000269956.1	MKNK1-AS1	2.69953	0	3.91701	5.49628	7.93388	7.86627
ENSG00000162456.9	KNCN	0	0	0	0	0	0
ENSG00000079277.19	MKNK1	122.829	109.862	158.639	183.209	153.917	136.873
ENSG00000142961.14	MOB3C	55.3405	70.9527	107.718	103.513	69.8181	119.567
ENSG00000123472.12	ATPAF1	705.928	714.105	518.025	501.994	707.702	707.178
ENSG00000233647.2	NENFP1	1.34977	0	0	0.916047	0	0.786627
ENSG00000186118.8	TEX38	1.34977	1.1444	0	0	0	0
ENSG00000228237.5	EFCAB14-AS1	0	1.1444	2.93776	0.916047	1.58678	1.57325
ENSG00000159658.10	EFCAB14	375.235	363.919	773.61	682.455	409.388	456.244
ENSG00000236476.2	RP11-8J9.5	1.34977	0	0	0	0	0
ENSG00000142973.12	CYP4B1	0	0	0	0	0	0
ENSG00000154198.14	CYP4Z2P	0	0	0	0.916047	0	0
ENSG00000238145.2	RP11-346M5.1	0	0	0	0	0	0
ENSG00000187048.12	CYP4A11	0	1.1444	0	0	0	0
ENSG00000259832.1	CYP4A26P	0	0	0	0	0	0
ENSG00000261196.1	CYP4A43P	0	0	0	0	0	0
ENSG00000261593.1	CYP4A27P	0	0	0	0	0	0
ENSG00000261290.1	CYP4A44P	0	0	0	0	0	0
ENSG00000186377.7	CYP4X1	0	0	3.91701	0	0	0.786627
ENSG00000186160.4	CYP4Z1	0	0	0	0.916047	0	0.786627
ENSG00000225154.2	RP11-184J23.2	0	0	0	0	0	0
ENSG00000225506.2	CYP4A22-AS1	1.34977	0	0.979253	0	0	0
ENSG00000162365.11	CYP4A22	0	0	0.979253	0	0	1.57325
ENSG00000225514.1	MTND1P34	0	0	0	0	0	0
ENSG00000224805.2	LINC00853	0	1.1444	0	0	1.58678	0
ENSG00000162366.7	PDZK1IP1	0	0	0	0	0	0
ENSG00000162367.11	TAL1	0	0	2.93776	5.49628	1.58678	1.57325
ENSG00000226252.1	RP1-18D14.7	0	0	0	0	0	0
ENSG00000123473.15	STIL	473.768	551.6	742.274	873.909	610.908	608.849
ENSG00000162368.13	CMPK1	1376.76	1559.81	1289.68	1313.61	1531.24	1650.34
ENSG00000225762.1	LINC01389	1.34977	1.1444	6.85477	3.66419	0	0.786627
ENSG00000186790.5	FOXE3	0	0	3.91701	1.83209	0	0
ENSG00000237424.1	FOXD2-AS1	4.0493	6.86639	3.91701	14.6568	14.281	8.6529
ENSG00000186564.5	FOXD2	18.8967	13.7328	54.8382	70.5356	15.8678	17.3058
ENSG00000271355.1	RP4-666O22.3	0	0	0	0	0	0
ENSG00000229554.2	RPL21P24	0	0	0	0	0	0
ENSG00000221346.1	AL356458.1	0	0	0	0	0	0
ENSG00000227883.1	ATP6V0E1P4	0	0	0	0	0	0
ENSG00000221447.1	AL591415.1	0	0	0	0	0	0
ENSG00000227947.1	RP11-543D5.1	0	0	0	0	0	0
ENSG00000269113.3	TRABD2B	0	0	0	0.916047	0	0
ENSG00000223814.1	RP11-543D5.2	0	0	0	0	0	0
ENSG00000225028.1	RP11-330M19.1	0	1.1444	0.979253	0	0	0
ENSG00000226133.6	RP4-683M8.2	0	0	0	0	0	0
ENSG00000231413.1	RP11-193P11.3	0	0	0	0	0	0
ENSG00000237180.1	CYP46A4P	0	0	0	0	0	0
ENSG00000242267.6	SKINTL	0	0	0	0	0	0
ENSG00000279096.1	AL356289.1	0	0	0	0	0	0
ENSG00000223720.2	RP5-1024N4.2	0	0	0	0.916047	0	0
ENSG00000117834.12	SLC5A9	0	0	0.979253	5.49628	3.17355	0
ENSG00000272491.1	RP5-1024N4.4	0	0	0	0.916047	0	0
ENSG00000279214.1	RP5-1024N4.5	0	0	0.979253	1.83209	0	0.786627
ENSG00000132122.11	SPATA6	18.8967	27.4656	252.647	200.614	42.8429	43.2645
ENSG00000224986.2	PPP1R8P1	0	0	0	1.83209	3.17355	0.786627
ENSG00000206700.1	RNU6-723P	0	0	0	0	0	0
ENSG00000235105.1	RP11-329A14.1	1.34977	1.1444	2.93776	3.66419	4.76033	1.57325
ENSG00000223175.1	RNU4-61P	0	0	0	0	0	0
ENSG00000232514.1	RP11-329A14.2	0	0	0	0	0	0
ENSG00000186094.16	AGBL4	0	1.1444	0.979253	0.916047	0	0
ENSG00000162373.12	BEND5	0	0	3.91701	0.916047	3.17355	2.35988
ENSG00000229846.1	RP11-141A19.1	0	0	0	0	0	0
ENSG00000230114.1	RP11-141A19.2	0	0	0	0	0	0
ENSG00000225623.1	AGBL4-IT1	0	0	0	0	0	0
ENSG00000237478.2	RP5-926E3.1	0	0	0	0	0	0
ENSG00000215887.5	ZNF859P	1.34977	0	0	0	0	0
ENSG00000221746.1	AL645730.1	0	0	0	0	0	0
ENSG00000279324.1	RP11-93G23.2	0	0	0	0	0	0
ENSG00000233595.2	MTND2P29	0	0	0	0	0	0.786627
ENSG00000162374.16	ELAVL4	0	0	3.91701	5.49628	0	0
ENSG00000230828.1	RP11-492I2.1	0	0	0	0	0	0
ENSG00000237337.1	RP11-567C20.2	0	0	0	0	0	0
ENSG00000233407.1	RP11-567C20.3	0	0	0	0	0	0
ENSG00000234080.3	RP11-183G22.1	1.34977	1.1444	1.95851	0	0	3.14651
ENSG00000229316.1	HMGB1P45	0	0	0	0	0	0
ENSG00000225671.2	FCF1P6	0	2.2888	0	0.916047	1.58678	0.786627
ENSG00000142700.11	DMRTA2	13.4977	13.7328	0	1.83209	14.281	7.07965
ENSG00000185104.19	FAF1	1326.82	1515.18	1038.99	1012.23	1505.85	1706.98
ENSG00000225767.1	RP5-850O15.3	2.69953	2.2888	0	2.74814	6.3471	1.57325
ENSG00000280887.1	Y_RNA	0	0	0	0	0	0
ENSG00000207194.1	RNU6-1026P	0	0	0	0	0	0
ENSG00000230585.2	PHBP12	1.34977	0	0	0.916047	0	3.14651
ENSG00000237130.1	MRPS6P2	0	1.1444	0.979253	0	1.58678	0
ENSG00000123080.10	CDKN2C	110.681	101.851	514.108	547.796	128.529	169.911
ENSG00000265538.1	MIR4421	0	0	0	0	0	0
ENSG00000275816.1	MIR6500	0	0	0.979253	0.916047	0	0
ENSG00000204006.8	C1orf185	0	0	0	0.916047	0	0.786627
ENSG00000200262.1	Y_RNA	0	0	0	0	0	0
ENSG00000213478.2	CFL1P2	0	0	0.979253	0	1.58678	0.786627
ENSG00000239101.1	AL162430.1	0	0	0	0	0	0
ENSG00000203356.2	LINC01562	0	0	0.979253	0	1.58678	0
ENSG00000123091.4	RNF11	989.379	892.631	923.435	840.015	1117.09	1125.66
ENSG00000233406.5	RP11-296A18.5	1.34977	1.1444	0	2.74814	1.58678	3.14651
ENSG00000236434.2	RP11-296A18.6	2.69953	0	0	0	0	0
ENSG00000085831.15	TTC39A	4.0493	2.2888	0.979253	4.58023	1.58678	1.57325
ENSG00000261664.5	TTC39A-AS1	0	0	0	0	0	0
ENSG00000085832.16	EPS15	824.708	1008.21	1062.49	906.886	920.33	952.606
ENSG00000232027.2	RP11-275F13.3	0	1.1444	3.91701	1.83209	3.17355	0
ENSG00000206595.1	RNU6-877P	0	0	0	0	0	0
ENSG00000238140.1	RP11-253A20.1	1.34977	0	0	0	0	0.786627
ENSG00000227070.1	RP11-191G24.1	2.69953	0	0	0	0	0.786627
ENSG00000252032.1	RNU6-1281P	0	0	0	0	0	0
ENSG00000227742.1	CALR4P	0	0	0.979253	0	0	0.786627
ENSG00000117859.18	OSBPL9	1662.91	1508.32	1666.69	1541.71	1613.75	1486.73
ENSG00000236973.2	GAPDHP51	0	0	0	0	0	0
ENSG00000232846.1	SLC25A6P3	0	0	0	0	0	0
ENSG00000212624.1	SNORA26	16.1972	46.9203	3.91701	10.9926	25.3884	51.9174
ENSG00000078618.19	NRD1	1475.3	1300.04	1252.46	1366.74	1937.45	1695.18
ENSG00000266993.3	RP4-657D16.3	2.69953	6.86639	3.91701	2.74814	3.17355	5.50639
ENSG00000272175.1	RP4-657D16.6	1.34977	2.2888	0.979253	1.83209	4.76033	3.14651
ENSG00000212076.1	MIR761	0	0	0	0	0	0
ENSG00000230604.2	TSEN15P2	0	1.1444	0	0	1.58678	0.786627
ENSG00000280742.1	AL589663.1	0	0	0	0	0	0
ENSG00000169213.6	RAB3B	1224.24	1013.94	268.315	287.639	1399.54	1378.17
ENSG00000200839.1	RNA5SP48	0	1.1444	0	0	1.58678	0
ENSG00000229032.1	RP11-91A18.1	2.69953	0	0	0	3.17355	0
ENSG00000264613.2	RN7SL290P	0	0	0	0	0	0
ENSG00000117862.11	TXNDC12	943.487	978.461	756.962	643.065	1085.35	1135.1
ENSG00000198841.3	KTI12	76.9367	75.5303	68.5477	70.5356	71.4049	87.3156
ENSG00000223390.1	RP11-91A18.4	0	0	0	0.916047	0	1.57325
ENSG00000228369.2	TXNDC12-AS1	2.69953	0	0.979253	0	3.17355	1.57325
ENSG00000134717.17	BTF3L4	873.299	1233.66	975.336	752.075	1088.53	1268.83
ENSG00000157077.14	ZFYVE9	440.024	362.774	232.083	197.866	487.14	538.84
ENSG00000241745.3	RN7SL788P	0	0	0	0	0	0
ENSG00000281172.1	AL139156.1	0	0	0	0	0	0
ENSG00000228407.2	RP4-800M22.1	2.69953	3.43319	0.979253	0.916047	3.17355	0.786627
ENSG00000223429.1	RP4-800M22.2	0	1.1444	0	0.916047	1.58678	0.786627
ENSG00000224255.2	PDCL3P6	0	0	0	0.916047	0	0
ENSG00000236004.2	RP4-800M22.4	0	0	0	0	0	0
ENSG00000237663.2	DNAJC19P7	0	0	0	0	0	0
ENSG00000213735.2	ANAPC10P1	0	0	0	1.83209	0	1.57325
ENSG00000154222.14	CC2D1B	155.223	125.884	366.241	403.977	174.545	188.791
ENSG00000272100.1	RP11-155O18.6	2.69953	1.1444	0	3.66419	0	0.786627
ENSG00000224680.4	PLA2G12AP1	1.34977	0	2.93776	10.0765	0	0
ENSG00000085840.12	ORC1	292.9	267.789	284.963	258.325	366.545	300.492
ENSG00000134748.12	PRPF38A	769.367	975.027	650.224	534.971	940.958	1012.39
ENSG00000134744.13	ZCCHC11	408.979	398.251	405.411	362.755	474.446	494.789
ENSG00000272371.1	RP11-25O10.2	0	0	0.979253	1.83209	1.58678	0
ENSG00000236290.1	EEF1GP7	0	0	0	0	0	0
ENSG00000116157.5	GPX7	70.1879	96.1295	1.95851	0	52.3636	66.8633
ENSG00000182183.14	FAM159A	1.34977	0	0	0	1.58678	0.786627
ENSG00000162377.5	COA7	496.714	514.979	363.303	279.394	542.677	565.585
ENSG00000233664.1	NDUFS5P3	0	0	0	0	0	0
ENSG00000239640.3	RN7SL62P	0	0	0	0	0	0
ENSG00000162378.12	ZYG11B	402.231	312.421	639.452	520.315	395.107	425.565
ENSG00000252018.1	RNU2-30P	0	0	0	0	0	0
ENSG00000228929.1	RPS13P2	10.7981	5.72199	4.89626	5.49628	7.93388	7.86627
ENSG00000206627.1	RNU6-969P	0	0	0	0	0	0.786627
ENSG00000203995.9	ZYG11A	0	0	3.91701	2.74814	0	0
ENSG00000242391.2	RP4-631H13.2	0	0	0	0	0	0
ENSG00000121310.16	ECHDC2	28.3451	16.0216	25.4606	40.3061	30.1487	21.2389
ENSG00000230953.2	RP4-631H13.6	4.0493	2.2888	0.979253	1.83209	1.58678	3.93314
ENSG00000231866.2	RP4-631H13.4	0	0	0	0	0	0
ENSG00000116171.16	SCP2	383.334	328.442	566.008	527.643	441.123	500.295
ENSG00000264834.1	MIR1273F	0	0	0	0	0	0
ENSG00000266188.1	MIR5095	0	0	0	0	0	0
ENSG00000265815.1	MIR1273G	0	0	0	0	0	0
ENSG00000237279.2	RP4-631H13.5	0	0	0	0.916047	0	0
ENSG00000236360.2	RP11-334A14.2	2.69953	2.2888	0	0.916047	0	0
ENSG00000226147.1	TUBBP10	0	0	0	0	0	0
ENSG00000279054.1	AL445183.1	0	0	0	0	0	0
ENSG00000174348.13	PODN	0	1.1444	0	0	0	0.786627
ENSG00000232993.1	RP11-334A14.5	0	0	0	0	0	0
ENSG00000227644.2	HIGD1AP11	0	0	0	0	0	0
ENSG00000162383.11	SLC1A7	0	0	0	0	0	0
ENSG00000235563.1	RP11-334A14.8	0	0	0	0	0	0
ENSG00000277397.1	RP5-1024G6.9	0	0	0	0	1.58678	0
ENSG00000157184.5	CPT2	47.2419	65.2307	102.822	79.6961	71.4049	55.0639
ENSG00000236723.2	RP5-1024G6.2	0	0	2.93776	2.74814	1.58678	0.786627
ENSG00000162384.13	C1orf123	149.824	161.36	209.56	193.286	166.611	188.791
ENSG00000259818.1	RP5-1024G6.7	1.34977	0	0	0.916047	0	0.786627
ENSG00000162385.10	MAGOH	375.235	583.643	286.921	296.799	444.297	498.722
ENSG00000226754.1	RP5-1024G6.5	0	3.43319	8.81327	3.66419	3.17355	0
ENSG00000157193.14	LRP8	221.362	193.403	660.996	722.761	266.578	265.093
ENSG00000234578.1	RP4-784A16.1	0	0	0	0	0	0
ENSG00000228838.1	RP4-784A16.2	0	0	0	0	1.58678	0
ENSG00000225030.1	RP4-784A16.3	0	0	0	1.83209	0	0
ENSG00000232762.1	RP4-784A16.4	4.0493	0	0	3.66419	0	0
ENSG00000225675.2	RP4-784A16.5	5.39907	4.57759	1.95851	7.32838	6.3471	1.57325
ENSG00000226938.1	RP11-117D22.1	0	0	0	0	0	0
ENSG00000230138.1	RP11-117D22.2	0	0	0	0	0	0
ENSG00000236253.7	SLC25A3P1	0	0	0	0	0	0
ENSG00000143006.7	DMRTB1	0	0	0	0	0	0
ENSG00000174332.5	GLIS1	0	4.57759	16.6473	28.3975	3.17355	0.786627
ENSG00000239007.1	RNU7-95P	0	0	0	0	0	0
ENSG00000058804.11	NDC1	1665.61	1722.32	1584.43	1438.19	1870.81	2206.49
ENSG00000201003.1	SNORA58	0	1.1444	1.95851	0	1.58678	2.35988
ENSG00000229687.2	RP4-654H19.2	0	0	0	0	0	0
ENSG00000058799.13	YIPF1	170.071	183.104	157.66	98.9331	149.157	197.443
ENSG00000211452.10	DIO1	2.69953	0	0	0.916047	3.17355	0
ENSG00000081870.11	HSPB11	357.688	373.074	401.494	501.078	480.793	420.846
ENSG00000116212.14	LRRC42	359.038	397.106	325.112	258.325	345.917	365.782
ENSG00000219102.3	HNRNPA3P12	0	0	0.979253	2.74814	3.17355	1.57325
ENSG00000203985.10	LDLRAD1	0	1.1444	0	0	0	0
ENSG00000116209.11	TMEM59	1086.56	1472.84	1443.42	1064.45	1194.84	1628.32
ENSG00000280378.1	RP4-758J24.6	4.0493	0	0	2.74814	1.58678	1.57325
ENSG00000116205.10	TCEANC2	222.712	260.923	143.95	148.4	276.099	245.428
ENSG00000264208.1	MIR4781	0	0	0	0	0	0
ENSG00000225183.1	RP4-758J24.4	0	0	0	0.916047	1.58678	0
ENSG00000279049.1	AL353898.1	0	0	0	0	0	0
ENSG00000157211.10	CDCP2	0	0	0	0	0	0
ENSG00000280425.1	RP11-446E24.3	0	0	0	0	0	0
ENSG00000256407.1	RP11-446E24.4	0	0	0	0.916047	0	0
ENSG00000215883.9	CYB5RL	22.946	19.4548	30.3568	26.5654	19.0413	29.1052
ENSG00000116221.15	MRPL37	677.583	740.426	654.141	740.166	823.536	748.082
ENSG00000157216.15	SSBP3	78.2865	83.5411	51.9004	53.1307	92.033	125.86
ENSG00000198711.5	SSBP3-AS1	2.69953	2.2888	0	3.66419	7.93388	1.57325
ENSG00000225632.1	RP5-997D24.3	0	0	0	0	1.58678	0
ENSG00000232245.1	RP4-705F19.1	0	0	0	0	0	0
ENSG00000281315.1	AC099796.2	0	0	0	0	0	0
ENSG00000265404.1	AC099796.1	0	0	0	0	0	0
ENSG00000235741.1	RP5-866L20.1	1.34977	0	0	0	0	0
ENSG00000237173.1	RP5-866L20.2	0	0	0	0	0	0
ENSG00000227453.1	HNRNPA1P63	1.34977	2.2888	0	3.66419	6.3471	4.71976
ENSG00000162390.17	ACOT11	5.39907	3.43319	4.89626	3.66419	3.17355	11.0128
ENSG00000162391.11	FAM151A	0	0	0	0	0	0
ENSG00000230728.1	RP11-240D10.4	0	0	0	0	0	0
ENSG00000184313.19	MROH7	0	0	0.979253	0	0	0
ENSG00000271723.5	MROH7-TTC4	0	0	0	0	0	0
ENSG00000243725.6	TTC4	18.8967	25.1768	18.6058	25.6493	23.8016	13.3727
ENSG00000162396.5	PARS2	40.493	42.3427	51.9004	49.4665	38.0826	47.1976
ENSG00000006555.10	TTC22	0	0	0	0	0	0.786627
ENSG00000237453.1	RP11-67L3.2	0	0	0	0	0	0
ENSG00000162398.11	LEXM	0	0	0.979253	0	0	0.786627
ENSG00000116133.11	DHCR24	2672.54	1971.8	3184.53	2314.85	2380.16	1894.98
ENSG00000242396.1	RP11-67L3.5	0	1.1444	0	0	0	0
ENSG00000233203.6	RP11-67L3.4	0	0	0.979253	1.83209	0	0
ENSG00000143001.4	TMEM61	0	0	0	0	0	0
ENSG00000233271.1	RP11-12C17.2	0	0	0	0	0	0
ENSG00000162399.6	BSND	0	0	0	0	0	0
ENSG00000169174.10	PCSK9	0	0	0	0	0	0
ENSG00000162402.13	USP24	730.224	656.885	786.34	701.692	937.784	1035.2
ENSG00000231090.1	RP11-101C11.1	0	0	0	0	0	0
ENSG00000231095.1	GYG1P3	0	0	0	0	0	0
ENSG00000265822.1	MIR4422	0	0	0	0	0	0
ENSG00000231900.3	GOT2P1	0	0	0.979253	0	0	0
ENSG00000232198.2	RP4-633H17.2	0	0	0	0	0	0
ENSG00000199831.1	RN7SKP291	63.4391	70.9527	165.494	193.286	61.8842	103.835
ENSG00000252162.1	RNU6-830P	0	0	0	0	0	0
ENSG00000272051.1	Y_RNA	0	0	0	0	0	0.786627
ENSG00000234810.2	RP11-90C4.1	0	1.1444	1.95851	0	0	0
ENSG00000230250.2	RP11-90C4.2	0	0	0	0	0	0
ENSG00000227104.3	PIGQP1	0	0	0	0	0	0
ENSG00000233079.1	RP11-90C4.3	0	0	0	0	0	0
ENSG00000235612.1	RP1-158P9.1	0	0	0	0	0	0
ENSG00000229871.1	RPSAP20	0	0	0	0	0	0
ENSG00000260971.3	RP11-504A18.1	4.0493	0	10.7718	5.49628	1.58678	3.93314
ENSG00000223307.2	AC119674.1	0	0	0	0	0	0
ENSG00000223956.2	RP4-710M16.2	0	0	0.979253	0	0	0
ENSG00000162407.8	PLPP3	32.3944	27.4656	219.353	161.224	42.8429	68.4366
ENSG00000236776.1	RPL21P23	0	0	0.979253	2.74814	0	0.786627
ENSG00000224980.1	RPL23AP85	0	0	1.95851	0	0	0
ENSG00000225475.1	RP11-377K22.2	0	2.2888	0	0.916047	0	0.786627
ENSG00000162409.10	PRKAA2	313.146	280.378	475.917	376.495	377.652	350.049
ENSG00000187889.12	C1orf168	1.34977	4.57759	0.979253	0	1.58678	0.786627
ENSG00000229913.1	RP11-378I13.1	0	0	0	0	0	0
ENSG00000157131.10	C8A	0	0	0.979253	0	0	0
ENSG00000021852.12	C8B	0	0	0	0	0	0
ENSG00000236341.1	RP5-1103B4.3	0	0	0	0	0	0
ENSG00000221591.1	AL161740.1	0	0	0	0	0	0
ENSG00000173406.15	DAB1	0	1.1444	61.6929	48.5505	0	0
ENSG00000227935.1	RP6-102O10.1	0	0	0	1.83209	0	0
ENSG00000236888.1	RPS20P5	0	1.1444	0	0	1.58678	0
ENSG00000238773.1	AL137855.1	0	0	0	0	0	0
ENSG00000226759.7	DAB1-AS1	0	1.1444	0.979253	0	0	0
ENSG00000229887.4	HNRNPA1P6	2.69953	0	1.95851	1.83209	3.17355	7.07965
ENSG00000223416.3	RPS26P15	0	0	0	0.916047	4.76033	0.786627
ENSG00000235038.1	RP11-393I23.4	0	0	0	0	0	0.786627
ENSG00000230546.1	RP11-393I23.3	0	0	0	0	0	0
ENSG00000233216.1	RP11-414C16.1	0	0	0	0	0	0
ENSG00000162600.11	OMA1	87.7349	116.729	302.589	177.713	123.768	173.058
ENSG00000270209.1	RP4-592A1.4	0	0	0	0	0	0
ENSG00000264128.2	RN7SL713P	0	0	0.979253	0	0	0
ENSG00000184292.6	TACSTD2	0	0	0	0	0	0
ENSG00000185839.3	RP4-592A1.2	13.4977	9.15519	5.87552	3.66419	11.1074	10.2262
ENSG00000162601.9	MYSM1	317.195	328.442	426.954	486.421	426.842	444.444
ENSG00000264081.1	AL136985.1	2.69953	2.2888	0	0	3.17355	0.786627
ENSG00000177606.6	JUN	1181.05	1121.51	658.058	720.929	1385.25	1329.4
ENSG00000234807.5	LINC01135	0	0	0.979253	2.74814	0	0.786627
ENSG00000272226.1	RP11-63G10.3	0	0	3.91701	0.916047	0	0.786627
ENSG00000231740.1	RP11-63G10.2	0	0	0	0	0	0
ENSG00000232453.6	RP4-794H19.1	0	2.2888	4.89626	0.916047	0	4.71976
ENSG00000237352.3	LINC01358	9.44837	8.01079	8.81327	5.49628	26.9752	18.0924
ENSG00000228121.1	PHBP3	4.0493	1.1444	0	0	0	2.35988
ENSG00000241042.1	RP11-145M4.1	0	0	0	0	0	0
ENSG00000235215.2	RP11-145M4.2	0	0	0	0	0	0
ENSG00000224609.6	HSD52	0	3.43319	0.979253	0.916047	0	3.14651
ENSG00000270457.1	RP11-467C18.1	0	0	0	0	0	0
ENSG00000172456.17	FGGY	10.7981	11.444	21.5436	19.237	26.9752	25.1721
ENSG00000266150.1	MIR4711	0	0	0	0	0	0
ENSG00000226883.1	RP4-782L23.2	0	0	0	0	0	0
ENSG00000134709.10	HOOK1	13.4977	22.888	1.95851	1.83209	23.8016	27.532
ENSG00000134716.9	CYP2J2	20.2465	21.7436	31.3361	14.6568	30.1487	26.7453
ENSG00000265535.2	RN7SL475P	0	0	0	0	0	0
ENSG00000162598.13	C1orf87	0	0	0	0	0	0.786627
ENSG00000229332.2	PGBD4P8	0	0	0	0	0	0
ENSG00000238242.1	RP11-575B7.3	0	0	0	0	0	0.786627
ENSG00000226476.3	RP11-776H12.1	0	1.1444	0.979253	0.916047	3.17355	0.786627
ENSG00000231252.2	RP11-436K8.1	0	0	0	0	0	0
ENSG00000162599.15	NFIA	33.7442	30.8988	7.83402	14.6568	55.5371	53.4907
ENSG00000280760.1	AL355795.1	0	0	0	0	0	0
ENSG00000237928.5	NFIA-AS2	0	0	4.89626	3.66419	0	0
ENSG00000270742.1	RP4-802A10.1	0	0	0	0	0	0
ENSG00000237853.6	NFIA-AS1	0	0	0	0	0	0
ENSG00000264551.1	AC099791.1	0	0	0	0	0	0
ENSG00000223920.2	RP11-430G17.1	0	0	0	0	0	0
ENSG00000162604.12	TM2D1	373.886	596.232	612.033	582.606	445.884	532.547
ENSG00000271200.1	RP11-430G17.3	0	0	0	0.916047	0	0
ENSG00000132849.19	INADL	133.627	93.8407	178.224	166.721	106.314	112.488
ENSG00000200575.1	RNU6-414P	4.0493	0	0	0	0	0
ENSG00000212360.1	RNU6-1177P	0	0	0	0	0	0
ENSG00000236646.1	LAMTOR5P1	0	0	0	0	0	0
ENSG00000242860.3	RN7SL180P	0	0	0	0	0	0
ENSG00000263908.1	MIR3116-2	0	0	0	0	0	0
ENSG00000234204.1	PIGPP2	0	0	0	0	0	0
ENSG00000234088.1	RPS15AP7	0	0	0	0	0	0
ENSG00000240563.1	L1TD1	0	0	0.979253	0	0	0
ENSG00000237227.1	RP5-1155K23.4	0	0	0	0	0	0
ENSG00000200174.1	Y_RNA	0	0	0	0	0	0
ENSG00000132854.18	KANK4	0	0	0	1.83209	0	0
ENSG00000201153.1	RNU6-371P	0	0	0	0	0	0
ENSG00000162607.12	USP1	2358.04	2297.95	2004.53	1841.25	2522.97	2297.74
ENSG00000116641.16	DOCK7	477.818	477.214	896.995	751.158	549.024	648.181
ENSG00000270549.1	RP11-293K19.1	0	0	1.95851	0	0	0
ENSG00000132855.4	ANGPTL3	1.34977	0	2.93776	2.74814	3.17355	2.35988
ENSG00000278967.1	RP5-849H19.3	0	0	0	2.74814	3.17355	0.786627
ENSG00000213703.2	RP5-849H19.2	0	1.1444	0	2.74814	0	0
ENSG00000235545.1	RP11-230B22.1	0	0	1.95851	0.916047	1.58678	0
ENSG00000125703.14	ATG4C	209.214	234.602	218.373	199.698	228.496	256.44
ENSG00000234318.1	RP4-771M4.3	1.34977	0	0	1.83209	0	0
ENSG00000237163.1	RP4-771M4.2	0	0	0	0	0	0
ENSG00000229537.5	RP11-5P4.1	0	0	0.979253	0	0	0
ENSG00000227485.1	RP11-5P4.2	0	0	0	0	0	0.786627
ENSG00000229225.1	RP11-5P4.3	0	0	0	0	0	0
ENSG00000203605.3	RP11-335E6.2	0	0	0	0	0	0.786627
ENSG00000224209.7	LINC00466	0	0	1.95851	2.74814	3.17355	1.57325
ENSG00000252259.1	RNA5SP49	0	0	0	0	0	0
ENSG00000228734.2	RP11-335E6.3	0	0	0	0	3.17355	0.786627
ENSG00000223683.1	RPSAP65	0	0	0	0	0	0
ENSG00000230798.5	FOXD3-AS1	18.8967	11.444	10.7718	5.49628	25.3884	16.5192
ENSG00000187140.5	FOXD3	6.74884	12.5884	7.83402	5.49628	7.93388	14.1593
ENSG00000275836.1	MIR6068	0	0	0	0	0	0
ENSG00000252784.1	Y_RNA	0	0	0	0	0	0
ENSG00000236674.1	RP4-792G4.3	0	0	0	0.916047	0	0
ENSG00000088035.15	ALG6	85.0353	61.7975	190.954	183.209	101.554	114.061
ENSG00000142856.16	ITGB3BP	816.609	1086.03	719.751	609.171	1061.55	1016.32
ENSG00000203965.12	EFCAB7	86.3851	89.2631	122.407	84.2763	99.9668	112.488
ENSG00000264271.2	RN7SL488P	0	0	0	0	0	0
ENSG00000251720.1	RNU7-123P	0	0	0	0	0	0
ENSG00000116652.6	DLEU2L	4.0493	0	1.95851	3.66419	0	1.57325
ENSG00000276884.1	DLEU2_6	0	0	0	0	0	0
ENSG00000278287.1	DLEU2_5	0	0	0	0	0	0
ENSG00000277565.1	DLEU2_4	0	0	0	0	0	0
ENSG00000275823.1	DLEU2_3	0	0	0	0	0	0
ENSG00000277689.1	DLEU2_2	0	0	0	0	0	0
ENSG00000274199.1	DLEU2_1	0	0	0	0	0	0
ENSG00000079739.15	PGM1	330.693	398.251	672.747	534.971	361.785	490.069
ENSG00000244256.3	RN7SL130P	0	0	0.979253	3.66419	0	0
ENSG00000185483.11	ROR1	0	1.1444	92.0498	115.422	1.58678	4.71976
ENSG00000177452.7	RP4-597J3.1	0	0	0	0	0	0
ENSG00000228056.3	CFL1P3	0	0	0	0.916047	0	0.786627
ENSG00000207190.1	RNU6-809P	0	0	0	0.916047	0	0
ENSG00000200508.1	Y_RNA	0	0	0	0.916047	0	0
ENSG00000223949.6	ROR1-AS1	0	0	0	3.66419	0	0.786627
ENSG00000177414.13	UBE2U	0	0	0.979253	0	0	1.57325
ENSG00000238653.1	RNU7-62P	0	0	0	0	0	0
ENSG00000158966.13	CACHD1	47.2419	57.2199	70.5062	55.8789	34.9091	70.7965
ENSG00000264470.1	MIR4794	0	0	0	0	0	0
ENSG00000162437.14	RAVER2	334.742	254.056	264.398	223.515	309.421	270.6
ENSG00000162434.11	JAK1	689.731	603.098	923.435	814.366	874.313	1183.09
ENSG00000234784.2	RP11-182I10.1	0	0	0	0	1.58678	0.786627
ENSG00000233877.2	RP11-182I10.2	0	0	0	0	0	0
ENSG00000226891.7	LINC01359	0	0	0	0	0	0
ENSG00000185031.6	SLC2A3P2	0	0	0	0	0	0
ENSG00000272506.1	RP4-535B20.4	0	0	0	0	0	0
ENSG00000212257.1	RNU6-1176P	0	0	0	0	0	0.786627
ENSG00000265996.1	MIR3671	0	0	0	0	0	0
ENSG00000199135.1	MIR101-1	0	0	0	0	0	0
ENSG00000231485.1	RP4-535B20.1	0	0	0	0	0	1.57325
ENSG00000235804.2	RP4-535B20.2	0	0	0	0	0	0
ENSG00000234496.2	MRPS21P1	0	0	0	0.916047	0	0
ENSG00000162433.14	AK4	105.282	135.039	90.0912	91.6047	138.049	197.443
ENSG00000231622.1	RP4-700A9.1	0	0	0	0	0	1.57325
ENSG00000116675.15	DNAJC6	59.3898	57.2199	227.187	168.553	149.157	122.714
ENSG00000229294.1	RP5-1044H5.1	1.34977	0	0	0	0	0
ENSG00000234144.1	COX6CP13	0	0	0	0.916047	0	0
ENSG00000222624.1	RNU2-15P	0	0	0	0	0	0
ENSG00000213625.8	LEPROT	430.576	576.777	1014.51	815.282	598.214	863.717
ENSG00000116678.18	LEPR	75.587	41.1983	276.149	200.614	190.413	174.631
ENSG00000237852.1	RP4-630A11.3	0	0	0.979253	0	1.58678	2.35988
ENSG00000224570.1	RP11-430H12.2	0	0	0	0.916047	0	0
ENSG00000239319.3	RN7SL854P	0	0	0	0	0	0
ENSG00000184588.17	PDE4B	113.38	109.862	883.286	742.914	271.339	388.594
ENSG00000227466.1	RP11-397C12.1	0	0	0	0	0	0
ENSG00000223152.1	RNU4-88P	0	0	0	0	0	0
ENSG00000118473.21	SGIP1	1.34977	0	0	0	0	1.57325
ENSG00000264720.2	AL139147.1	0	0	0	0	0	0
ENSG00000248458.2	RP4-598P13.1	0	0	0	0	0	0
ENSG00000221655.2	AL354978.1	0	0	0	0	0	0
ENSG00000152760.9	TCTEX1D1	0	0	0	0	0	0.786627
ENSG00000172410.4	INSL5	0	0	0	0	0	0
ENSG00000152763.16	WDR78	2.69953	4.57759	95.9668	105.345	4.76033	7.86627
ENSG00000231080.1	RP11-342H21.2	0	0	0	0	0	0
ENSG00000198160.14	MIER1	892.196	1102.06	1613.81	1411.63	1213.88	1477.29
ENSG00000116704.7	SLC35D1	195.716	179.671	361.344	364.587	225.322	291.052
ENSG00000203963.11	C1orf141	0	0	0	0.916047	0	0
ENSG00000252433.1	SNORA31	0	0	0	0	0	0.786627
ENSG00000275678.1	RP4-547N15.3	0	0	0	0	1.58678	0
ENSG00000162594.14	IL23R	0	0	0	0	0	2.35988
ENSG00000253074.1	RNU6-586P	0	0	0	0	0	0
ENSG00000221733.1	AL109843.1	0	0	0	0	0	0
ENSG00000252116.1	RNU4ATAC4P	0	0	0	0	0	0
ENSG00000228523.1	RP11-131O15.2	0	0	0	0	0	0
ENSG00000081985.10	IL12RB2	28.3451	22.888	2.93776	7.32838	31.7355	29.8918
ENSG00000142864.14	SERBP1	6360.1	6487.59	4399.78	4795.51	7416.59	7694.79
ENSG00000223263.1	RNU6-387P	2.69953	8.01079	2.93776	2.74814	3.17355	9.43953
ENSG00000235200.2	RP11-393N21.2	0	0	0	0	0	0
ENSG00000207504.1	RNU6-1031P	0	0	0	0	0	0
ENSG00000238139.2	RP11-393N21.1	0	0	0	0	0	0
ENSG00000242482.3	RN7SL392P	0	0	0	0	1.58678	0
ENSG00000232048.2	HNRNPCP9	0	0	0	0	0	0
ENSG00000116717.11	GADD45A	284.801	347.897	426.954	449.779	395.107	311.504
ENSG00000172380.5	GNG12	3074.77	3153.96	4897.24	4570.16	3730.51	3916.62
ENSG00000238778.1	RNU7-80P	1.34977	1.1444	0	0	0	1.57325
ENSG00000232284.7	GNG12-AS1	12.1479	3.43319	10.7718	17.4049	9.52065	14.9459
ENSG00000235055.3	RP4-609E1.2	0	0	0	0	0	0
ENSG00000162595.4	DIRAS3	0	0	0.979253	0.916047	1.58678	2.35988
ENSG00000228431.1	ARL5AP3	0	0	0	0	0	0
ENSG00000263542.1	AL157407.1	0	0	0	0	0	0
ENSG00000116729.13	WLS	336.092	247.19	489.626	383.824	328.462	289.479
ENSG00000234383.1	CTBP2P8	1.34977	4.57759	0.979253	3.66419	1.58678	1.57325
ENSG00000221203.1	MIR1262	0	0	0	0	0	0
ENSG00000229133.1	RPS7P4	2.69953	12.5884	0.979253	4.58023	6.3471	1.57325
ENSG00000225242.2	COX6B1P7	0	1.1444	0	0	0	0
ENSG00000237622.1	TCEB1P18	0	1.1444	0.979253	0	0	0
ENSG00000229440.1	RP5-1033K19.2	0	0	0	0	0	0
ENSG00000116745.6	RPE65	0	0	0	0.916047	1.58678	0.786627
ENSG00000024526.16	DEPDC1	2676.59	3141.37	3484.18	3296.85	2997.42	4031.46
ENSG00000233589.1	RP4-694A7.2	10.7981	8.01079	4.89626	15.5728	15.8678	10.2262
ENSG00000234264.1	DEPDC1-AS1	1.34977	6.86639	0.979253	4.58023	3.17355	8.6529
ENSG00000225167.1	TXNP2	0	0	0	0	0	0
ENSG00000223883.1	RP11-424D14.1	0	0	0	0	0	0
ENSG00000235446.1	RP11-74K19.1	0	0	0.979253	0	0	0
ENSG00000229639.1	RP3-380B4.1	0	0	0	0	0	0
ENSG00000033122.18	LRRC7	14.8474	8.01079	26.4398	32.0616	11.1074	15.7325
ENSG00000270615.1	SGOL1P1	0	0	0	0	0	0
ENSG00000240692.3	RN7SL538P	0	0	0	0	0	0
ENSG00000229359.2	PIN1P1	0	0	0	0	0	0
ENSG00000237919.5	RP11-181B18.1	0	0	1.95851	0	0	0.786627
ENSG00000066557.5	LRRC40	462.97	517.268	812.78	659.554	450.644	560.079
ENSG00000244389.3	RN7SL242P	0	2.2888	0	0.916047	0	0.786627
ENSG00000116754.13	SRSF11	1406.46	1478.56	1849.81	1594.84	1724.82	1622.81
ENSG00000228988.1	RP4-677H15.4	0	0	0	0.916047	0	0.786627
ENSG00000118454.12	ANKRD13C	427.876	418.85	525.859	548.712	471.272	508.948
ENSG00000197568.13	HHLA3	2.69953	6.86639	19.5851	21.9851	9.52065	15.7325
ENSG00000226088.1	RP11-180O5.2	0	2.2888	0	0.916047	1.58678	0
ENSG00000279230.1	AL158839.1	0	0	0	0	0	0
ENSG00000116761.11	CTH	29.6949	25.1768	28.3983	10.9926	46.0165	38.5447
ENSG00000278636.1	Metazoa_SRP	0	0	0	0	0	0
ENSG00000271992.1	RP11-42O15.3	0	0	0	0.916047	0	0
ENSG00000233020.1	RP11-42O15.2	6.74884	4.57759	1.95851	0.916047	4.76033	3.93314
ENSG00000237033.2	CASP3P1	0	0	0	0	0	0
ENSG00000229051.1	RP5-952N6.1	1.34977	0	0	0	0	0
ENSG00000226208.1	RP11-99H8.1	0	0	0	0	0	0
ENSG00000050628.20	PTGER3	0	0	5.87552	4.58023	3.17355	1.57325
ENSG00000235782.1	RP3-333A15.1	0	0	0	0	0	0
ENSG00000269933.1	RP3-333A15.2	0	0	0	0	0	0
ENSG00000235079.1	ZRANB2-AS1	1.34977	1.1444	0.979253	2.74814	1.58678	2.35988
ENSG00000132485.12	ZRANB2	1079.81	1498.02	1577.58	1465.68	1278.94	1536.28
ENSG00000207721.1	MIR186	0	0	0	0	0	0
ENSG00000229956.10	ZRANB2-AS2	2.69953	1.1444	4.89626	13.7407	11.1074	3.14651
ENSG00000264239.1	AL360297.1	0	0	0	0	0	0
ENSG00000226324.1	RP11-115M14.1	0	0	0	0	0	0
ENSG00000172260.13	NEGR1	237.559	205.992	147.867	156.644	428.429	444.444
ENSG00000231985.1	RP11-82L20.1	1.34977	0	0	0	0	0
ENSG00000271618.1	RP11-175G14.2	0	0	0	0	0	0.786627
ENSG00000228853.1	NEGR1-IT1	0	0	0	0	0	0
ENSG00000233994.2	GDI2P2	8.0986	9.15519	2.93776	14.6568	12.6942	7.07965
ENSG00000227207.2	RPL31P12	0	0	0	0	0	0
ENSG00000212366.1	RNU6-1246P	0	0	0	0	0	0
ENSG00000225087.1	RP4-660H19.1	0	0	0	0	0	0.786627
ENSG00000227016.3	RP11-262K1.1	0	0	0.979253	0	0	0.786627
ENSG00000280317.1	RP11-25L19.1	0	0	0	0	0	0
ENSG00000229636.2	KRT8P21	0	0	0	0	0	0
ENSG00000251825.1	RN7SKP19	0	0	0	0	0	0
ENSG00000233973.6	LINC01360	0	0	0	0.916047	0	0
ENSG00000223479.3	RP4-788P17.1	0	0	0	0	0	0
ENSG00000200601.1	RNA5SP50	0	0	0	0	0	0
ENSG00000252005.2	RNU4ATAC8P	0	0	0	0	0	0
ENSG00000162620.15	LRRIQ3	76.9367	52.6423	59.7344	56.7949	50.7768	34.6116
ENSG00000254685.6	FPGT	63.4391	57.2199	223.27	162.14	76.1652	81.0226
ENSG00000259030.6	FPGT-TNNI3K	0	0	0.979253	0	1.58678	0
ENSG00000116783.14	TNNI3K	0	0	0	0	0	0.786627
ENSG00000237324.3	RP11-439H8.4	0	0	0	0	0	0.786627
ENSG00000233894.1	RP4-650F12.2	0	0	0	0	0	0
ENSG00000162621.6	LRRC53	0	0	0.979253	0	0	0.786627
ENSG00000178965.13	ERICH3	0	0	2.93776	2.74814	0	0
ENSG00000234497.5	ERICH3-AS1	0	0	0	0	0	0
ENSG00000272864.1	RP11-17E13.2	0	0	0	0	0	0
ENSG00000116791.13	CRYZ	383.334	482.936	1090.89	802.457	390.347	530.973
ENSG00000162623.15	TYW3	697.83	720.971	847.054	725.509	717.222	759.882
ENSG00000229943.1	RP11-93N20.1	0	0	0	0	0	0
ENSG00000261213.1	RP11-510C10.4	0	0	0	0	0	0
ENSG00000224127.1	RP11-510C10.2	0	0	0	0.916047	0	0
ENSG00000162624.14	LHX8	89.0846	48.0647	20.5643	18.3209	90.4462	93.6086
ENSG00000224149.1	RP11-510C10.3	0	0	0	0	0	0
ENSG00000274200.1	AC118550.1	0	0	0	0	0	0
[truncated: 58,726 more rows]
